# Supplementary material for: Metabolite discovery through global annotation of untargeted metabolomics data
Source: Research Square preprint supplement (doi:10.21203/rs.3.rs-142459/v1), 2021-01-22
Supplement: Supplementary file 1 [file 387749ef6e92f1d20634aced.xlsx]

## Sheet:  yeast negative-mode dataset
label	metaGroupId	peak_id	goodPeakCount	medMz	medRt	maxQuality	isotopeLabel	compound	compoundId	formula	expectedRtDiff	ppmDiff	parent	sample
		1		281.248	2.43551	0.834982								9.97471e+08
		2		255.233	2.46972	0.835577								4.60803e+08
		3		253.217	2.48217	0.836559								4.56486e+08
		4		88.0403	13.0122	0.8347								4.4285e+08
		5		143.108	4.21003	0.83782								2.85067e+08
		6		143.108	2.82076	0.829276								2.15649e+08
		7		283.264	2.4324	0.836013								2.70005e+08
		8		146.046	13.4981	0.83841								2.60729e+08
		9		146.046	9.9806	0.835087								4.10941e+06
		10		282.252	2.43551	0.835549								201067121
		11		156.991	13.8907	0.836915								2.01859e+08
		12		121.029	4.21315	0.832376								1.56953e+08
		13		145.062	11.2937	0.737631								248945
		14		173.104	16.7707	0.829713								1.56388e+08
		15		174.088	13.6433	0.837586								1.14817e+08
		16		115.076	4.23504	0.814346								8.70774e+07
		17		115.076	3.01441	0.825202								2.34607e+07
		18		256.236	2.46972	0.836287								8.01866e+07
		19		254.221	2.48217	0.835958								8.08353e+07
		20		205.16	2.57592	0.834501								6.80563e+07
		21		131.083	13.6433	0.83763								7.02662e+07
		22		131.083	16.2423	0.798292								2.16345e+07
		23		131.083	16.7833	0.74463								2.17666e+07
		24		131.084	9.83713	0.744298								67773.1
		25		131.084	9.28824	0.684683								58592.9
		26		284.267	2.43551	0.836785								5.30376e+07
		27		151.061	7.19328	0.786745								5.02193e+07
		28		191.02	14.1822	0.838655								4.6719e+07
		29		118.051	13.0091	0.830246								4.53878e+07
		30		239.06	2.62307	0.808292								2.95986e+07
		31		116.072	11.2098	0.782024								4.03627e+07
		32		165.041	2.56338	0.822604								2.1908e+07
		33		165.041	2.83961	0.822253								2.1908e+07
		34		316.116	13.5802	0.8395								35792213
		35		87.0087	4.20066	0.812106								2.62811e+07
		36		87.0087	3.02078	0.742785								3.91131e+06
		37		87.0087	4.94834	0.639108								1.79359e+07
		38		158.13	14.714	0.819878								9734.35
		39		133.014	13.5422	0.760989								3.01093e+07
		40		144.111	4.21003	0.838548								2.54824e+07
		41		144.111	2.82076	0.827426								1.92427e+07
		42		232.883	13.8437	0.842541								2.17759e+07
		43		194.937	13.8499	0.839704								2.30282e+07
		44		313.079	2.60102	0.819438								13768800
		45		313.081	14.0018	0.845025								202271
		46		445.187	2.77991	0.839522								2.0141e+07
		47		401.13	13.8813	0.840084								1.5319e+07
		48		401.13	14.8218	0.835844								4.46896e+06
		49		311.169	2.08348	0.836508								2.04628e+07
		50		102.056	13.5013	0.837238								2.10479e+07
		51		102.056	12.1664	0.816351								3.99546e+06
		52		306.077	13.4981	0.837283								1.63937e+07
		53		169.123	2.70773	0.832385								1.80452e+07
		54		169.123	4.15988	0.709276								4.78843e+06
		55		128.035	13.495	0.815974								1.81858e+07
		56		128.035	10.3439	0.814665								2.94695e+06
		57		128.035	11.1454	0.77638								8.24498e+06
		58		325.184	2.08028	0.833812								1.6714e+07
		59		299.259	2.63561	0.838712								1.76514e+07
		60		299.259	4.18815	0.82047								4.37419e+06
		61		241.217	2.47906	0.833997								1.77222e+07
		62		283.256	2.43551	0.835418								1.67262e+07
		63		130.087	9.83714	0.780963								1.71104e+07
		64		130.087	9.31435	0.714796								1.37538e+07
		65		89.0436	13.0122	0.835743								1.59573e+07
		66		158.989	13.8907	0.82089								1.52318e+07
		67		132.03	13.5802	0.829778								1.56035e+07
		68		132.03	11.2904	0.836079								6.00972e+06
		69		147.049	13.4981	0.839502								1.48915e+07
		70		164.072	8.83292	0.831178								1.49334e+07
		71		164.072	13.394	0.658591								240290
		72		241.073	4.23504	0.832666								1.05672e+07
		73		241.072	2.37291	0.780983								2.33734e+06
		74		165.055	4.20066	0.833553								1.25987e+07
		75		165.055	2.85223	0.79145								4.23926e+06
		76		349.184	13.6465	0.842054								1.1993e+07
		77		309.28	2.40748	0.838979								11187701
		78		248.08	2.35051	0.83881								1.13061e+07
		79		248.08	3.31242	0.618815								385973
		80		122.033	4.21003	0.832659								1.20759e+07
		81		122.033	2.92844	0.805641								1.45675e+06
		82		206.163	2.57592	0.836558								1.04005e+07
		83		151.04	2.91892	0.826032								1.36133e+07
		84		339.2	2.07071	0.808991								1.05014e+07
		85		269.249	2.45728	0.830107								9.67827e+06
		86		146.065	13.3877	0.838833								1.0827e+07
		87		187.072	11.2937	0.840274								1.01386e+07
		88		330.87	13.8719	0.841588								1.05708e+07
		89		254.968	13.897	0.840573								9.45252e+06
		90		181.072	11.8088	0.841176								1.04495e+07
		91		174.107	16.7675	0.830289								1.05346e+07
		92		611.145	14.1918	0.837825								9.44397e+06
		93		563.505	2.43551	0.851434								7.5476e+06
		94		182.009	13.4193	0.838939								8.98104e+06
		95		157.994	13.8907	0.834183								9.03422e+06
		96		223.028	2.5698	0.809741								6.65324e+06
		97		135.045	4.21003	0.838337								8.31704e+06
		98		135.045	2.87759	0.803623								1.66091e+06
		99		257.176	2.63247	0.836866								8.26091e+06
		100		257.176	4.06748	0.759668								906961
		101		175.072	11.3001	0.838282								8.52594e+06
		102		175.072	12.1697	0.472358								157774
		103		176.038	7.14218	0.784271								9.03201e+06
		104		232.893	13.8593	0.84122								8.15257e+06
		105		127.051	13.3751	0.834542								7960112
		106		131.046	13.4035	0.833628								8.07659e+06
		107		131.046	12.5301	0.818072								160859
		108		175.091	13.637	0.837873								7.83873e+06
		109		297.153	2.09941	0.838915								7.43846e+06
		110		174.077	12.2415	0.839838								7.79477e+06
		111		174.077	11.2421	0.746103								110307
		112		131.071	4.21003	0.829108								6.81126e+06
		113		131.071	2.93797	0.803033								996216
		114		308.795	13.8531	0.843155								6.69088e+06
		115		242.08	13.5865	0.840246								7.13318e+06
		116		242.08	14.353	0.824405								3.60338e+06
		117		242.08	13.0847	0.847431								285216
		118		242.078	9.26866	0.710384								280949
		119		116.08	4.23192	0.81421								5.82846e+06
		120		116.08	3.01441	0.824536								1.53053e+06
		121		245.971	13.5107	0.808241								6.63561e+06
		122		257.24	2.46972	0.834947								5.80737e+06
		123		135.031	7.65917	0.841217								7.01977e+06
		124		225.062	2.83961	0.835431								4.92481e+06
		125		221.06	14.1758	0.821999								6.66613e+06
		126		347.216	16.7738	0.83745								6.56888e+06
		127		267.233	2.45728	0.836282								5.44528e+06
		128		240.063	2.62307	0.821168								1.70054e+06
		129		341.109	14.8251	0.83899								3.50933e+06
		130		341.109	13.8844	0.821272								4.09739e+06
		131		313.238	2.50709	0.837751								5.29019e+06
		132		313.238	4.21628	0.831544								915769
		133		439.076	13.8437	0.844143								2.71924e+06
		134		439.077	14.8251	0.817185								13213.3
		135		292.914	13.8562	0.841488								5.65528e+06
		136		270.839	13.8468	0.842947								5.59561e+06
		137		138.02	13.4161	0.832643								5.58265e+06
		138		446.19	2.78306	0.837275								5.02421e+06
		139		377.237	2.43551	0.83828								4.66822e+06
		140		537.489	2.45728	0.851047								3.97494e+06
		141		104.035	13.4509	0.818755								5.39168e+06
		142		267.073	8.67841	0.776922								5.60774e+06
		143		299.081	2.65131	0.836998								3.42737e+06
		144		606.074	13.7483	0.810076								4.50102e+06
		145		214.048	13.6181	0.841112								5.15218e+06
		146		115.921	13.0122	0.746553								5.10737e+06
		147		115.921	13.3877	0.736121								5.14425e+06
		148		265.181	2.57592	0.833362								4.94965e+06
		149		161.045	13.0594	0.828375								5.09093e+06
		150		91.04	7.05942	0.787004								5.09671e+06
		151		305.069	14.1886	0.838096								4.94931e+06
		152		565.52	2.4324	0.855684								3.42985e+06
		153		279.233	2.4635	0.837719								4.34919e+06
		154		299.201	2.51021	0.832577								2.84495e+06
		155		74.0247	13.337	0.856919								4.94089e+06
		156		74.0246	13.006	0.847899								4.94089e+06
		157		180.066	10.7571	0.803211								5.06686e+06
		158		290.176	2.56339	0.834046								4.2375e+06
		159		290.176	3.81251	0.770873								585516
		160		158.046	11.3258	0.836967								4.57816e+06
		161		158.046	13.3814	0.607692								356947
		162		341.27	2.43862	0.814226								4.30038e+06
		163		130.051	9.03964	0.837635								4.83716e+06
		164		130.051	12.6812	0.786555								241122
		165		164.058	7.7207	0.849895								4.83068e+06
		166		164.056	10.38	0.802058								15871.2
		167		216.099	11.3001	0.838502								4.38083e+06
		168		216.099	12.3364	0.745281								249145
		169		216.099	11.9677	0.611429								249145
		170		233.155	2.53208	0.834567								2.98688e+06
		171		346.056	13.7323	0.766729								4.49378e+06
		172		352.945	13.8875	0.843333								3.56913e+06
		173		294.903	13.9158	0.819144								3.89721e+06
		174		136.017	2.91891	0.831992								2.51241e+06
		175		314.082	2.52283	0.85443								769503
		176		565.048	13.9411	0.787866								3.75795e+06
		177		133.051	7.76614	0.714082								4.34818e+06
		178		317.12	13.577	0.84046								3.90703e+06
		179		160.061	10.7571	0.707082								3.10986e+06
		180		564.508	2.43551	0.850282								2.9295e+06
		181		158.97	13.9095	0.806537								3.74885e+06
		182		312.172	2.08665	0.839512								3.69678e+06
		183		241.056	2.62622	0.857935								2.82597e+06
		184		385.166	2.78306	0.839337								3.34567e+06
		185		151.026	9.01678	0.840754								4.12393e+06
		186		159.102	4.21627	0.8279								3.16774e+06
		187		159.102	2.70773	0.761156								1.55791e+06
		188		159.102	3.77684	0.666883								776570
		189		281.099	2.43862	0.788587								3.76903e+06
		190		166.04	2.57278	0.804566								2.19971e+06
		191		166.04	2.84277	0.824383								2.19971e+06
		192		132.086	13.6402	0.837727								3.84902e+06
		193		132.086	16.2423	0.649825								1.19479e+06
		194		132.086	16.7833	0.640635								1.15741e+06
		195		368.807	13.8437	0.849658								3.12483e+06
		196		172.061	11.2615	0.830943								3.6496e+06
		197		172.061	10.3308	0.827336								1.16451e+06
		198		134.916	13.8499	0.841179								3.55528e+06
		199		170.043	12.9997	0.817168								3.53595e+06
		200		170.043	14.4369	0.790333								43192.3
		201		103.004	13.3877	0.834184								3.47134e+06
		202		175.061	11.9677	0.677368								2.49735e+06
		203		244.067	11.8088	0.784534								3.64211e+06
		204		244.065	9.6022	0.835746								156287
		205		244.067	11.3614	0.745615								3.25181e+06
		206		300.262	2.63246	0.839082								3.44736e+06
		207		300.262	4.18187	0.698237								779485
		208		240.059	2.6168	0.816737								4.35693e+06
		209		315.254	2.47283	0.827748								3.14883e+06
		210		315.254	4.2194	0.804864								1.52267e+06
		211		315.254	2.75162	0.691498								3.14883e+06
		212		310.934	13.897	0.835385								2.85595e+06
		213		188.056	13.2595	0.839039								3.35238e+06
		214		94.0298	13.4161	0.835796								3.44931e+06
		215		142.975	13.8938	0.830957								3.24919e+06
		216		291.131	13.3782	0.851168								3.3816e+06
		217		326.188	2.08348	0.842014								3.18551e+06
		218		88.0121	4.97097	0.654338								647279
		219		306.058	7.59458	0.796289								3.25634e+06
		220		306.058	9.60871	0.845505								171385
		221		88.0667	13.0028	0.836773								3.0696e+06
		222		450.263	7.09439	0.835217								2.74604e+06
		223		450.263	3.06532	0.826366								1.43629e+06
		224		318.207	2.49151	0.832428								2.95507e+06
		225		318.207	3.71849	0.845143								223357
		226		431.191	13.6149	0.844065								2.85658e+06
		227		402.133	13.8813	0.840933								2.13267e+06
		228		402.134	14.8284	0.834918								622268
		229		535.473	2.46661	0.854765								2.59624e+06
		230		321.087	13.6813	0.838495								3.06325e+06
		231		248.582	2.34729	0.841274								2.91498e+06
		232		248.582	3.33492	0.836553								94234.8
		233		145.051	7.1837	0.780988								3.25596e+06
		234		145.098	16.9156	0.816104								3.12273e+06
		235		917.546	2.45417	0.840188								2.53193e+06
		236		132.066	11.3001	0.838723								3.03653e+06
		237		132.066	13.2337	0.765509								8905.24
		238		315.075	2.56977	0.822249								1.70556e+06
		239		242.221	2.48217	0.743526								2.72775e+06
		240		149.009	2.56651	0.782333								1.81932e+06
		241		217.083	13.5834	0.840144								3.06198e+06
		242		217.083	10.2129	0.822524								23671.5
		243		217.083	10.9302	0.813784								20730.9
		244		313.113	13.3719	0.859113								2.95662e+06
		245		313.114	11.5409	0.842711								165158
		246		313.114	12.1468	0.836778								202038
		247		88.0146	13.0249	0.856407								2.96499e+06
		248		214.145	4.20691	0.840468								2.5258e+06
		249		214.145	2.8082	0.82044								1.52762e+06
		250		147.066	5.73642	0.641092								1.27884e+06
		251		243.081	9.06251	0.829657								2.92761e+06
		252		243.083	13.5707	0.839318								451647
		253		243.083	14.3497	0.825825								236156
		254		183.97	13.5044	0.840792								2.78984e+06
		255		170.028	2.8082	0.827833								1.77812e+06
		256		152.064	7.1837	0.747106								2.90932e+06
		257		509.457	2.47283	0.855257								2.25923e+06
		258		281.4	2.43551	0.860465								3.52026e+06
		259		310.283	2.40748	0.831691								2.43313e+06
		260		117.056	4.2194	0.803228								2.22182e+06
		261		117.056	5.275	0.656035								1.59604e+06
		262		265.108	2.78621	0.838893								2.4961e+06
		263		403.149	13.5549	0.843353								2.27795e+06
		264		167.038	2.64817	0.794527								1.53335e+06
		265		315.081	13.495	0.858101								2.2387e+06
		266		184.028	13.006	0.840405								2.58251e+06
		267		288.12	13.4698	0.841617								2.40558e+06
		268		173.057	11.3065	0.83838								2.20524e+06
		269		326.111	7.62687	0.796048								2.47651e+06
		270		326.109	11.2486	0.802173								14455.7
		271		199.07	13.0028	0.842467								2.31819e+06
		272		406.772	13.8499	0.84866								2.33736e+06
		273		662.102	13.9159	0.811421								2.2959e+06
		274		203.083	8.71793	0.83895								2.4388e+06
		275		229.144	2.60417	0.811963								2.2043e+06
		276		478.294	7.09122	0.828811								1.99355e+06
		277		478.294	3.0685	0.826974								1.41416e+06
		278		191.056	13.0248	0.836074								2.22923e+06
		279		191.056	12.0716	0.682313								465940
		280		227.065	13.3877	0.781031								2.29475e+06
		281		227.065	14.4433	0.818542								19152.8
		282		349.205	2.48528	0.840011								1.86331e+06
		283		243.062	7.60103	0.786145								2.28145e+06
		284		243.062	9.61199	0.728499								1.77368e+06
		285		118.023	13.3052	0.839486								2261524
		286		174.101	16.7802	0.809231								2.34466e+06
		287		406.763	13.8468	0.848845								1.95592e+06
		288		340.203	2.06114	0.839681								2.07361e+06
		289		505.988	14.243	0.774402								1.90877e+06
		290		148.048	8.8559	0.824288								29140.9
		291		148.05	9.97735	0.816448								31810.8
		292		428.847	13.8813	0.826686								2.07594e+06
		293		170.127	2.70459	0.834034								2.01006e+06
		294		170.127	4.16618	0.756877								503726
		295		297.28	2.40436	0.821815								1.98368e+06
		296		332.868	13.8719	0.830059								1.98925e+06
		297		117.075	11.2098	0.790331								2.26429e+06
		298		253.345	2.48528	0.795546								1.94782e+06
		299		253.345	3.40881	0.795414								13855.1
		300		259.022	14.1886	0.817327								2.21592e+06
		301		90.0445	13.0154	0.797166								2.11705e+06
		302		111.009	14.179	0.748901								2.13147e+06
		303		160.044	7.59135	0.813938								2.14966e+06
		304		119.054	13.0091	0.833528								2.02151e+06
		305		612.148	14.1758	0.813426								1.97326e+06
		306		307.08	13.495	0.764787								1.62123e+06
		307		351.221	2.46972	0.831612								1.76333e+06
		308		351.221	2.04194	0.725608								592321
		309		73.0295	13.3084	0.636664								2.03163e+06
		310		173.009	13.8687	0.795647								1.48009e+06
		311		152.043	2.92527	0.816521								1.20463e+06
		312		172.098	7.09439	0.829283								1.75126e+06
		313		168.028	13.5076	0.805653								1.91009e+06
		314		156.078	16.7674	0.834797								2.20324e+06
		315		552.33	7.09439	0.826178								1.70221e+06
		316		552.33	3.07169	0.77474								459512
		317		134.047	7.61718	0.817746								2.08773e+06
		318		134.047	5.00973	0.642345								1.58603e+06
		319		134.047	14.9626	0.538375								675817
		320		253.085	3.57618	0.700039								7540.36
		321		272.062	11.5147	0.851327								163864
		322		272.062	8.07893	0.833328								44889.9
		323		272.062	7.74342	0.816444								44889.9
		324		272.062	10.8093	0.802843								22999
		325		272.062	12.4447	0.775622								20061.6
		326		253.144	2.70146	0.827209								1.75376e+06
		327		253.144	4.16618	0.800257								639282
		328		330.861	13.8499	0.849187								1.71426e+06
		329		499.107	13.875	0.805951								1.93987e+06
		330		499.107	14.8153	0.844795								54193
		331		566.524	2.43551	0.851009								1.38977e+06
		332		237.084	13.6591	0.859434								1.89964e+06
		333		237.084	14.1085	0.846239								1.13895e+06
		334		239.202	2.50398	0.83358								1.85536e+06
		335		197.04	14.1982	0.782751								1.03492e+06
		336		272.065	13.755	0.780088								1.87839e+06
		337		818.308	2.51646	0.857								1.53586e+06
		338		818.308	3.41528	0.62687								24304
		339		241.063	2.56979	0.823516								245857
		340		343.285	2.4324	0.808986								1.58264e+06
		341		343.285	4.14366	0.827901								86776.8
		342		426.022	14.005	0.771594								1.74843e+06
		343		213.15	2.83017	0.81662								1.39467e+06
		344		143.054	7.16137	0.817751								49768.4
		345		143.162	3.72172	0.77215								11769.9
		346		115.004	13.5549	0.686416								1.9121e+06
		347		114.98	13.9316	0.786974								1.73478e+06
		348		237.061	13.0815	0.829178								1.8192e+06
		349		269.212	4.21003	0.706134								753711
		350		889.515	2.4884	0.855826								1.48669e+06
		351		157.062	13.6433	0.854251								893249
		352		918.549	2.45417	0.857535								1.48751e+06
		353		330.851	13.8468	0.855564								1.32755e+06
		354		205.035	14.0826	0.805456								1.76279e+06
		355		603.004	13.919	0.839014								1.64825e+06
		356		78.959	14.2046	0.717552								1.65119e+06
		357		242.076	4.23192	0.837633								1.25052e+06
		358		242.076	3.0685	0.822393								34955.1
		359		242.076	3.59547	0.792717								28319.7
		360		404.105	14.8218	0.840659								1.6848e+06
		361		404.104	13.8813	0.813075								852938
		362		404.104	13.4382	0.836499								188998
		363		197.155	2.59788	0.825108								1.56018e+06
		364		197.155	2.18604	0.736603								1.23556e+06
		365		507.442	2.49151	0.857485								1.33179e+06
		366		158.939	13.0752	0.681871								711743
		367		196.935	13.8499	0.840374								1.59811e+06
		368		222.135	11.2195	0.816907								1.48759e+06
		369		166.044	2.57278	0.853335								931009
		370		166.044	2.83647	0.785812								931009
		371		255.107	16.7643	0.80813								1.72868e+06
		372		255.11	11.8542	0.83655								134022
		373		538.492	2.45728	0.855952								1.34056e+06
		374		350.187	13.6465	0.843005								1.47167e+06
		375		891.531	2.47906	0.850597								1.30751e+06
		376		274.014	13.6465	0.858667								1.6211e+06
		377		105.019	11.2969	0.811397								1.55568e+06
		378		252.892	13.919	0.833933								1.36222e+06
		379		256.091	13.6433	0.817007								1.58306e+06
		380		256.091	14.4014	0.825664								25919.7
		381		392.88	13.9064	0.836346								1.20414e+06
		382		318.096	13.5739	0.840252								1.40652e+06
		383		145.99	13.5138	0.822537								1.52261e+06
		384		158.995	13.8907	0.830016								1.66622e+06
		385		379.252	2.4324	0.838592								1.16438e+06
		386		201.981	13.5013	0.830022								1.57351e+06
		387		244.987	13.3877	0.838248								1.58847e+06
		388		215.165	2.62304	0.829831								1.34654e+06
		389		201.981	12.1926	0.806735								10941.9
		390		146.059	13.3908	0.858832								1.46622e+06
		391		494.252	7.09758	0.833583								1.2068e+06
		392		236.861	13.9253	0.819549								1.24136e+06
		393		143.053	4.20691	0.787604								1.68343e+06
		394		143.053	2.82076	0.781276								1.2881e+06
		395		176.056	13.3814	0.651469								1.56172e+06
		396		215.115	13.3782	0.841974								1.4072e+06
		397		496.178	13.8875	0.827534								781333
		398		496.178	14.8251	0.839013								86024.8
		399		224.028	2.61681	0.807991								921805
		400		303.233	2.49151	0.801144								1.12623e+06
		401		145.112	4.21003	0.834609								1.17212e+06
		402		145.112	2.81762	0.814342								899021
		403		304.061	13.4761	0.857583								1.31455e+06
		404		304.061	13.0217	0.82402								963725
		405		304.061	12.2252	0.804897								44992.5
		406		511.473	2.46661	0.855329								1.03733e+06
		407		279.039	7.59457	0.84152								1.37819e+06
		408		250.145	2.05157	0.802595								1.00433e+06
		409		250.145	2.60732	0.707476								147923
		410		275.125	14.0115	0.836645								1.3434e+06
		411		249.055	13.394	0.83713								1.20201e+06
		412		157.05	10.1867	0.685751								856010
		413		536.476	2.47283	0.855693								1.0591e+06
		414		165.075	8.83292	0.813522								1.48831e+06
		415		235.17	2.52271	0.829868								1.27602e+06
		416		256.966	13.8938	0.807111								1.28092e+06
		417		131.035	13.0815	0.827998								1.33886e+06
		418		196.073	11.284	0.839302								1.34217e+06
		419		327.254	2.4324	0.826626								1.30892e+06
		420		228.049	13.5044	0.80432								1.30788e+06
		421		228.049	14.4401	0.819018								11182.9
		422		281.397	2.44484	0.859677								2.97329e+06
		423		203.129	4.20378	0.828215								1.27495e+06
		424		203.129	2.81762	0.790162								961301
		425		298.156	2.10261	0.822114								1.26852e+06
		426		314.242	2.50398	0.829822								978698
		427		314.242	4.21315	0.847204								172247
		428		314.242	3.69577	0.778942								24267.2
		429		145.014	12.862	0.798928								1.33223e+06
		430		284.259	2.43551	0.763735								834998
		431		241.144	2.18604	0.805695								1.19549e+06
		432		231.098	13.4129	0.838458								1.25418e+06
		433		444.718	13.8468	0.855213								1.19308e+06
		434		175.085	13.637	0.839412								1.29683e+06
		435		88.0283	13.0091	0.791545								360892
		436		310.793	13.8499	0.854968								1.10963e+06
		437		166.059	4.20378	0.833293								1.19407e+06
		438		166.059	2.86173	0.805607								386265
		439		168.043	14.3529	0.829434								1.24047e+06
		440		168.043	13.5833	0.773431								83048.4
		441		174.043	6.00972	0.692793								1.33433e+06
		442		314.078	2.57291	0.826484								2.47339e+06
		443		134.018	13.5359	0.773202								1.32335e+06
		444		258.179	2.63246	0.838156								1.18045e+06
		445		258.179	4.04824	0.843849								125426
		446		110.985	13.7004	0.832356								1.20274e+06
		447		88.0136	13.0216	0.857368								3.10409e+06
		448		137.996	13.9253	0.787146								1.36255e+06
		449		137.061	3.03353	0.82623								1.12408e+06
		450		225.008	4.21627	0.824844								603359
		451		225.008	3.07168	0.761223								514281
		452		200.997	13.3908	0.783266								1.22654e+06
		453		99.0088	13.3052	0.82239								1.14095e+06
		454		407.237	16.7674	0.855641								1.11493e+06
		455		289.115	14.1918	0.840124								1.06503e+06
		456		554.31	3.0685	0.833048								1.05447e+06
		457		554.31	7.09439	0.808677								718070
		458		644.03	13.7681	0.849786								906314
		459		302.533	13.7483	0.857284								1.13033e+06
		460		293.099	13.4981	0.855733								1.03534e+06
		461		229.156	7.08487	0.833804								980393
		462		182.987	13.3971	0.834783								1.13794e+06
		463		890.518	2.49151	0.8551								862750
		464		305.57	14.1918	0.838226								1.07216e+06
		465		338.067	13.9762	0.834103								1.06257e+06
		466		287.223	4.2194	0.819296								1.06075e+06
		467		131.091	9.83063	0.716415								1.16202e+06
		468		131.091	9.31436	0.635229								908273
		469		234.891	13.8531	0.841702								1.02464e+06
		470		93.0345	4.21315	0.791815								907390
		471		299.026	2.95388	0.851722								733971
		472		299.026	2.65444	0.847296								733971
		473		281.75	2.4324	0.856242								739996
		474		145.117	13.3814	0.794338								1.09276e+06
		475		504.73	13.8468	0.849881								837481
		476		342.273	2.4324	0.789411								893240
		477		243.16	2.62933	0.826039								1.05639e+06
		478		243.16	8.58938	0.840653								205580
		479		243.16	4.08374	0.83019								137917
		480		510.461	2.47594	0.8552								816428
		481		121.072	2.92209	0.796171								117767
		482		178.973	14.3949	0.732973								979361
		483		212.957	13.9222	0.816345								1.00019e+06
		484		258.038	13.6781	0.841549								1.02323e+06
		485		258.038	14.1375	0.830289								252799
		486		329.085	7.63333	0.778151								1.07749e+06
		487		329.087	13.3782	0.824655								48722.6
		488		88.1281	13.006	0.795428								785947
		489		215.033	6.82469	0.694679								33334.2
		490		129.019	6.50697	0.705961								618592
		491		580.362	3.07168	0.850504								339585
		492		580.362	7.09758	0.826165								951170
		493		580.362	3.61168	0.755554								7946.64
		494		190.054	7.10395	0.829819								984652
		495		129.039	11.1389	0.622675								454586
		496		146.082	9.90883	0.85812								1.11623e+06
		497		156.928	13.8876	0.8128								1.07443e+06
		498		212.013	13.6496	0.824135								1.06683e+06
		499		604.07	14.1085	0.840379								991448
		500		215.96	13.5013	0.856391								964724
		501		187.109	12.9462	0.809708								1.06115e+06
		502		187.109	8.63557	0.822828								146421
		503		187.109	9.51385	0.659215								305404
		504		569.273	7.09122	0.834381								898507
		505		356.103	5.01296	0.743991								889896
		506		356.103	14.9724	0.76334								387533
		507		249.078	2.35051	0.83824								934056
		508		249.078	3.34455	0.831109								29590.9
		509		362.051	14.0826	0.834063								993258
		510		554.123	14.1918	0.813648								955916
		511		110.976	8.18372	0.834403								112969
		512		296.882	13.9285	0.816512								804508
		513		187.965	12.9934	0.825894								1.00433e+06
		514		268.236	2.45417	0.834387								898231
		515		255.197	2.62304	0.833052								909229
		516		522.283	7.09122	0.836346								900086
		517		919.558	2.45417	0.854243								587181
		518		145.114	4.21315	0.83925								945403
		519		145.114	2.82076	0.821658								706448
		520		256.192	2.62304	0.834107								821503
		521		256.192	3.96158	0.84103								141375
		522		243.196	4.22566	0.822518								821746
		523		100.934	13.0091	0.780937								921161
		524		100.934	11.3065	0.786931								27257.9
		525		100.934	8.82309	0.790389								5957.81
		526		323.029	13.9285	0.799185								910034
		527		408.911	13.897	0.85462								720254
		528		201.113	2.30548	0.73829								297096
		529		193.108	4.35008	0.831835								632048
		530		313.165	2.08346	0.839346								851633
		531		256.947	13.9127	0.816737								1.07371e+06
		532		234.879	13.8468	0.849141								2.19053e+06
		533		521.327	16.7738	0.830825								947024
		534		280.236	2.46351	0.791311								788198
		535		327.291	2.54147	0.838117								801629
		536		301.217	2.46973	0.769179								787133
		537		296.901	13.9158	0.828002								783405
		538		539.505	2.45417	0.853481								704978
		539		184.025	12.9206	0.840013								882033
		540		255.088	2.33446	0.834822								830502
		541		103.059	13.495	0.835025								930255
		542		103.059	12.186	0.838325								180282
		543		387.097	2.5634	0.855631								526519
		544		238.068	11.3001	0.839521								906895
		545		234.881	13.8468	0.848923								1.06058e+06
		546		308.072	13.5013	0.839439								663617
		547		255.362	2.47283	0.786434								1.82147e+06
		548		296.1	7.88323	0.807546								957382
		549		147.043	13.495	0.841197								952559
		550		167.044	13.3909	0.837819								915776
		551		167.044	14.3949	0.83355								13906.3
		552		283.415	2.43551	0.858049								1.00723e+06
		553		521.137	2.51334	0.853247								400149
		554		524.111	2.52896	0.854387								500930
		555		99.9258	13.0217	0.666758								899215
		556		253.987	13.4446	0.772914								672531
		557		253.987	14.1053	0.783264								170302
		558		253.987	14.3077	0.761948								117713
		559		203.029	13.006	0.814747								893176
		560		291.18	2.56651	0.855577								709177
		561		291.18	3.79306	0.84046								103857
		562		146.966	3.20632	0.849359								483933
		563		386.169	2.78306	0.837861								740166
		564		300.205	2.50397	0.848251								593551
		565		288.86	13.8781	0.812005								831851
		566		607.078	13.7483	0.85674								747821
		567		301.157	7.10076	0.830392								788584
		568		266.184	2.57591	0.857019								784697
		569		152.047	13.5644	0.693914								454797
		570		194.946	14.1343	0.776689								864153
		571		88.0171	13.0122	0.851778								124788
		572		892.534	2.47594	0.854209								715243
		573		176.035	5.8568	0.657723								393178
		574		188.076	11.2904	0.840883								789632
		575		354.943	13.8844	0.854439								701865
		576		225.025	2.57291	0.732496								599258
		577		100.934	13.3782	0.78448								921366
		578		159.03	13.3751	0.783186								823760
		579		537.053	13.8499	0.854568								741534
		580		174.041	13.3751	0.694397								818090
		581		371.066	2.63873	0.849633								393813
		582		173.032	16.7706	0.854333								793395
		583		223.134	2.68578	0.851341								456115
		584		140.035	12.9174	0.732922								840604
		585		429.155	2.77991	0.841038								713518
		586		453.078	13.9033	0.855945								469650
		587		582.341	3.06851	0.836654								779962
		588		582.341	7.10076	0.849097								383649
		589		582.341	3.5697	0.806548								42259.7
		590		198.075	11.2002	0.820357								833124
		591		198.075	9.29804	0.819337								40339.2
		592		198.075	9.84041	0.7889								19720.7
		593		87.9523	13.0091	0.815298								791190
		594		319.043	14.1726	0.801042								792141
		595		319.211	2.49463	0.85444								596854
		596		319.211	3.70874	0.831898								46405.4
		597		402.995	14.1085	0.790125								822943
		598		214.022	9.03312	0.805696								849416
		599		179.035	2.84276	0.838996								136892
		600		348.219	16.7738	0.825452								776671
		601		496.268	7.09439	0.833405								730162
		602		155.01	8.56959	0.854719								833875
		603		282.1	2.4324	0.856812								682237
		604		123.036	4.21315	0.8287								369423
		605		354.924	13.9032	0.835095								645010
		606		371.166	13.6433	0.854378								732143
		607		211.082	9.89905	0.817326								790811
		608		211.084	13.1624	0.798408								216117
		609		211.084	12.4414	0.623251								81239
		610		386.164	2.08345	0.845047								26787
		611		282.084	9.71007	0.819759								774846
		612		259.191	4.20378	0.836471								573132
		613		237.186	2.51958	0.834739								653841
		614		142.051	7.16772	0.711163								793087
		615		234.158	2.53209	0.851642								461937
		616		294.915	13.8531	0.854083								650032
		617		178.087	2.89031	0.831907								477072
		618		447.193	2.77362	0.837808								613779
		619		497.167	2.34729	0.856326								666481
		620		497.167	3.3285	0.834537								48070.1
		621		370.805	13.8437	0.817209								588791
		622		158.082	7.0944	0.77249								664494
		623		450.922	13.8875	0.853515								589100
		624		316.257	2.47594	0.807651								613833
		625		316.257	4.21315	0.814054								263578
		626		207.166	2.56966	0.821129								682655
		627		259.091	13.0248	0.855047								756716
		628		116.057	11.242	0.84425								24070.1
		629		446.182	2.80506	0.818828								631743
		630		85.0659	7.07852	0.820527								589546
		631		85.0658	4.19753	0.821923								73549.9
		632		136.048	4.20691	0.833999								681636
		633		136.048	2.87759	0.847389								137484
		634		176.092	13.6402	0.803507								714003
		635		176.093	11.2292	0.823289								42812.1
		636		176.093	9.30129	0.804415								26875.4
		637		176.093	9.84367	0.736846								14422.4
		638		183.013	13.4161	0.841052								662042
		639		72.0091	13.006	0.74513								601231
		640		451.266	7.09758	0.853638								559425
		641		451.266	3.06532	0.850247								308299
		642		504.749	13.8593	0.854519								643268
		643		312.291	2.53209	0.853826								590969
		644		132.923	13.006	0.738208								744969
		645		132.923	13.394	0.673385								753405
		646		229.181	4.22879	0.824364								381078
		647		229.181	2.43862	0.735989								510685
		648		300.084	2.64817	0.853726								217065
		649		217.048	11.8056	0.8547								699899
		650		217.048	11.3711	0.847434								593507
		651		327.18	2.08346	0.825175								692547
		652		598.13	2.51958	0.855518								412890
		653		189.077	4.09964	0.710645								731995
		654		115.059	11.9742	0.813402								742914
		655		295.264	2.41994	0.822755								554800
		656		280.746	2.45106	0.855837								542734
		657		760.08	13.9064	0.838044								532584
		658		120.987	4.20691	0.822714								1.00854e+06
		659		120.987	2.93479	0.787424								118066
		660		171.006	13.5865	0.832527								695049
		661		241.039	2.87759	0.818288								366164
		662		160.04	7.14538	0.692803								637112
		663		96.0455	12.9271	0.840355								679275
		664		342.112	14.8284	0.840054								424194
		665		342.112	13.8813	0.822644								481483
		666		114.02	2.75164	0.592552								584626
		667		597.304	7.09122	0.837431								575092
		668		328.881	13.8562	0.801594								672474
		669		159.992	13.8656	0.856162								618432
		670		133.992	2.26994	0.839838								636918
		671		133.992	2.62933	0.76577								636918
		672		408.77	13.8531	0.854708								632715
		673		599.32	7.09122	0.835812								551217
		674		440.08	13.8468	0.853588								332134
		675		253.091	2.48528	0.852696								1.49915e+06
		676		101.072	13.3845	0.838716								664505
		677		202.12	14.714	0.808482								644805
		678		202.12	14.2398	0.669723								353781
		679		148.044	10.0754	0.856855								685842
		680		542.685	13.8468	0.850399								530480
		681		246.971	13.5107	0.854862								653177
		682		133.033	13.577	0.853958								666642
		683		133.034	11.2872	0.848321								257001
		684		201.099	13.4446	0.839508								574054
		685		302.101	13.5833	0.841366								659708
		686		193.026	14.1822	0.852757								87281.5
		687		207.051	4.94512	0.798361								676288
		688		207.051	12.2317	0.832733								95765.6
		689		419.284	2.4324	0.855239								479141
		690		512.476	2.46972	0.852896								397667
		691		182.075	11.8056	0.803098								686330
		692		182.075	11.3614	0.735752								512332
		693		226.061	2.83647	0.833062								466902
		694		302.045	13.0216	0.855163								590706
		695		302.045	13.5138	0.842808								154781
		696		115.116	3.01122	0.815492								155099
		697		115.116	4.22566	0.76359								560377
		698		482.674	13.8499	0.85307								551071
		699		175.111	16.7675	0.852835								261411
		700		299.223	2.47283	0.698591								599608
		701		241.574	2.37291	0.856349								525673
		702		241.574	3.3799	0.835055								22701.5
		703		430.826	13.8844	0.85449								575242
		704		452.901	13.8875	0.854242								542375
		705		447.064	2.61989	0.848935								340380
		706		312.933	13.8875	0.855213								546563
		707		445.053	14.0115	0.834953								521605
		708		508.445	2.48217	0.853338								444739
		709		176.076	11.3001	0.837563								567056
		710		176.076	12.1958	0.62319								7722.94
		711		200.054	13.0028	0.809598								605700
		712		386.837	13.8844	0.854589								594053
		713		486.158	12.9934	0.819685								557260
		714		196.916	13.8405	0.854142								584695
		715		613.14	14.179	0.827282								605479
		716		389.144	13.6275	0.854702								515230
		717		247.093	11.2744	0.853888								605396
		718		193.024	14.179	0.767467								662003
		719		285.243	2.34088	0.838436								588493
		720		285.243	2.65443	0.789596								588493
		721		285.243	4.20378	0.750249								228361
		722		255.971	13.8907	0.798283								553251
		723		116.921	13.0028	0.759661								576528
		724		116.921	11.3323	0.808808								21517.5
		725		116.921	13.4035	0.697114								561496
		726		819.311	2.53208	0.854912								527656
		727		98.9491	1.99035	0.83001								629577
		728		463.219	2.07708	0.803596								39765.6
		729		175.08	12.235	0.840869								610063
		730		111.02	7.59135	0.69903								690876
		731		111.02	8.55634	0.696148								663997
		732		141.092	4.22566	0.801615								548349
		733		141.092	2.8177	0.713764								271654
		734		175.108	16.7865	0.823891								633848
		735		406.002	13.4981	0.85478								470092
		736		430.845	13.8813	0.854271								584687
		737		314.097	13.4509	0.85492								484117
		738		408.76	13.8499	0.854058								457334
		739		174.015	13.6402	0.807632								611533
		740		452.278	7.09439	0.853224								512116
		741		452.278	3.06532	0.851002								307183
		742		452.278	3.64077	0.828154								8819.09
		743		566.051	13.9285	0.807788								566815
		744		102.02	9.98714	0.83581								554165
		745		322.045	14.0244	0.832232								550981
		746		268.077	8.66852	0.794967								602953
		747		200.056	7.59782	0.841809								24622.5
		748		303.083	7.59457	0.833721								573048
		749		516.204	13.8875	0.853649								297717
		750		174.161	13.6402	0.854038								610006
		751		168.03	2.61046	0.815435								388879
		752		325.275	2.43551	0.790158								498769
		753		143.29	4.20378	0.853028								343372
		754		143.29	2.81448	0.838711								211454
		755		255.666	2.46972	0.8549								347798
		756		649.101	14.1631	0.797522								532499
		757		193.072	4.4985	0.687248								589339
		758		487.309	2.43551	0.854927								474034
		759		274.104	13.6496	0.781126								546190
		760		189.113	4.21003	0.765345								455408
		761		448.174	2.79249	0.839264								459672
		762		195.086	16.7738	0.793516								575037
		763		195.087	7.48774	0.692333								423019
		764		195.087	8.05934	0.651093								126956
		765		159.077	13.2696	0.852846								309470
		766		159.077	11.3097	0.835347								569183
		767		159.077	13.6623	0.848197								319102
		768		159.077	12.8489	0.744482								274885
		769		332.174	2.06114	0.838445								461468
		770		96.8585	13.8593	0.855411								433936
		771		277.007	7.04983	0.671803								545178
		772		284.223	2.53833	0.854851								467278
		773		284.223	3.79956	0.833154								48499.1
		774		672.149	2.50709	0.854003								285315
		775		337.311	2.38242	0.852673								420778
		776		398.124	13.0342	0.724114								506457
		777		506.728	13.8468	0.854561								465642
		778		273.171	4.22879	0.801875								440531
		779		272.093	2.60417	0.855098								513042
		780		177.038	7.12623	0.839977								85433.1
		781		219.175	2.58534	0.846925								337990
		782		300.193	7.09758	0.834151								463998
		783		403.134	13.8813	0.85506								387852
		784		403.135	14.8284	0.848296								104782
		785		553.334	7.09122	0.833437								460725
		786		160.025	13.4541	0.830651								442586
		787		479.297	7.09122	0.841514								460345
		788		274.104	11.6589	0.813511								54529.4
		789		123.034	4.21315	0.828235								663645
		790		263.07	13.4635	0.807977								449358
		791		128.033	13.006	0.854539								501397
		792		714.508	4.23819	0.830594								485848
		793		714.508	3.0399	0.814688								367675
		794		173.137	16.7738	0.849475								80157.6
		795		192.957	13.9412	0.737019								567561
		796		383.114	13.4035	0.776861								476450
		797		88.0486	13.0154	0.854051								602838
		798		466.774	13.8468	0.851031								393979
		799		173.093	11.3033	0.834176								513438
		800		173.093	13.6023	0.828952								297377
		801		173.093	11.9029	0.829902								166828
		802		173.093	13.0851	0.803241								55628.5
		803		224.032	2.57605	0.785827								325676
		804		663.105	13.919	0.855589								508765
		805		251.202	2.50398	0.816643								492157
		806		528.286	7.09758	0.85584								404210
		807		208.057	13.3751	0.855019								524528
		808		280.634	2.43862	0.854294								369519
		809		217.976	13.0216	0.854189								508136
		810		240.205	2.50086	0.853575								345055
		811		427.322	2.75161	0.855082								468335
		812		271.081	16.7674	0.855476								452091
		813		202.083	11.342	0.840374								447239
		814		202.083	13.0752	0.846095								118082
		815		202.083	11.8575	0.832097								40670.1
		816		202.083	12.77	0.772817								118082
		817		490.857	13.9001	0.854329								393628
		818		302.066	7.62687	0.784953								490039
		819		206.082	3.04308	0.801143								288985
		820		206.082	5.782	0.749092								437424
		821		206.082	4.23192	0.711433								412671
		822		226.075	13.006	0.841619								483527
		823		315.058	2.71087	0.850421								263106
		824		175.051	5.90886	0.707927								523527
		825		479.297	3.07168	0.83441								328276
		826		331.174	13.2466	0.811117								33414.5
		827		334.838	13.9158	0.828698								458711
		828		188.093	13.0279	0.620817								57216.5
		829		350.869	13.9064	0.790382								385736
		830		540.053	13.9064	0.799134								405030
		831		321.141	13.5928	0.853675								492282
		832		369.198	16.7738	0.85437								506421
		833		182.057	11.2937	0.839486								418196
		834		137.024	2.40437	0.754303								490359
		835		190.965	7.19329	0.690016								452385
		836		253.089	3.43132	0.81091								13030.3
		837		222.063	14.1599	0.821244								484572
		838		127.017	7.01785	0.854752								516405
		839		482.961	14.3691	0.775912								451147
		840		333.059	14.0018	0.849329								467368
		841		117.081	4.23818	0.804492								351189
		842		287.052	11.3065	0.841493								445295
		843		175.036	13.6339	0.85412								474760
		844		153.065	7.19649	0.766115								771497
		845		200.129	4.22879	0.827176								407814
		846		200.129	2.91256	0.845187								152484
		847		200.129	3.81256	0.772985								325506
		848		132.078	13.5928	0.851347								308076
		849		318.12	13.5802	0.850205								471516
		850		553.334	3.07487	0.844199								124224
		851		195.94	13.8468	0.840453								456024
		852		305.249	2.42928	0.855653								360444
		853		128.055	13.3877	0.854506								442165
		854		468.782	13.8844	0.854091								361327
		855		269.089	13.5897	0.784926								412932
		856		446.716	13.8499	0.854128								392274
		857		234.064	2.38558	0.834621								403284
		858		216.944	13.3052	0.849158								434759
		859		281.863	2.43551	0.85377								361705
		860		257.078	5.28795	0.809098								473278
		861		257.078	7.95815	0.803877								24159.8
		862		301.077	2.6513	0.854182								301331
		863		575.01	13.8562	0.85397								425958
		864		243.027	7.0562	0.685575								411985
		865		407.221	7.10076	0.838072								432623
		866		261.073	13.394	0.817293								428195
		867		261.073	14.0244	0.83836								74386.4
		868		245.078	7.84745	0.812378								423742
		869		245.077	9.06251	0.585991								111860
		870		341.196	2.06752	0.854671								404748
		871		347.059	13.7291	0.854658								446191
		872		298.283	2.41372	0.856398								402727
		873		139.023	13.4193	0.745557								365153
		874		209.155	2.69832	0.819711								403910
		875		209.155	4.16932	0.840999								146954
		876		432.195	13.6086	0.853103								383370
		877		253.646	2.48217	0.854075								317458
		878		353.172	2.56652	0.853498								346324
		879		177.088	12.9997	0.854472								425343
		880		311.097	2.96343	0.844003								121714
		881		311.097	14.195	0.823								26522.5
		882		389.133	13.577	0.853939								411734
		883		279.094	11.3097	0.842853								411161
		884		196.07	13.6465	0.855773								373393
		885		196.07	14.3787	0.818176								12091.9
		886		191.104	6.16911	0.78716								463913
		887		119.023	13.3148	0.855084								436292
		888		243.051	13.3719	0.844197								42625.3
		889		280.75	2.43551	0.854911								250353
		890		331.874	13.8656	0.853951								371715
		891		427.322	4.22253	0.85408								383941
		892		230.024	13.6496	0.85551								401460
		893		230.022	14.3238	0.837762								18715.7
		894		238.994	13.9316	0.732315								377752
		895		238.994	14.4078	0.637155								225785
		896		331.072	13.4887	0.856386								399362
		897		296.074	9.46805	0.855171								450297
		898		330.061	13.5108	0.85041								32915.7
		899		307.264	2.40748	0.853779								387661
		900		528.07	2.73907	0.854556								194936
		901		208.065	13.0028	0.814149								373548
		902		227.165	2.76733	0.70937								376549
		903		316.192	2.51645	0.855202								326396
		904		316.192	3.74444	0.827975								28326.6
		905		242.06	2.61374	0.844512								158316
		906		242.059	5.93488	0.839805								11109.2
		907		163.04	12.4184	0.834253								460949
		908		266.111	2.77677	0.854792								349743
		909		213.086	16.2456	0.855933								432913
		910		329.158	13.7163	0.852935								359031
		911		87.9326	13.006	0.855387								253477
		912		281.317	2.44173	0.852807								317214
		913		330.069	8.66852	0.803644								441434
		914		330.068	11.4199	0.827004								7868.97
		915		394.878	13.9033	0.853371								328824
		916		315.082	2.51667	0.854027								188021
		917		112.023	5.3268	0.854544								440265
		918		112.023	8.51999	0.820328								30361.6
		919		112.023	7.58812	0.805879								29424
		920		213.088	13.4224	0.814944								20416.6
		921		213.087	9.90557	0.828173								8236.45
		922		271.037	13.3909	0.848674								32237
		923		146.233	13.5107	0.852926								305537
		924		237.15	2.36971	0.853077								341338
		925		237.15	2.68264	0.844445								341338
		926		359.048	2.65758	0.854439								454282
		927		259.016	14.1503	0.853721								344292
		928		317.225	2.4324	0.85561								300082
		929		226.065	2.83332	0.835673								279712
		930		415.307	2.66698	0.855555								365383
		931		281.036	7.59458	0.806868								413757
		932		380.033	2.93479	0.852121								255773
		933		174.947	14.2174	0.60781								387860
		934		686.477	4.24447	0.826732								360226
		935		686.477	3.0399	0.816968								330075
		936		121.072	4.21627	0.787184								1.00492e+06
		937		171.114	4.23818	0.852673								291781
		938		171.114	3.18379	0.708185								51564.5
		939		281.296	2.42928	0.838839								317693
		940		306.067	14.1918	0.809111								391349
		941		790.524	3.07168	0.813207								355459
		942		790.524	4.41129	0.796004								370929
		943		450.093	2.56027	0.853059								275103
		944		249.083	3.36384	0.813719								10006
		945		227.059	2.83647	0.836654								306827
		946		178.034	7.15494	0.855239								400289
		947		324.254	2.44484	0.855123								342730
		948		233.883	13.8437	0.852725								303788
		949		296.082	5.00004	0.790932								365084
		950		316.075	2.56969	0.853405								221702
		951		239.095	4.20378	0.851575								314241
		952		239.096	2.81762	0.820907								259470
		953		241.181	2.67951	0.743479								357195
		954		920.564	2.45106	0.852827								297376
		955		308.074	7.84745	0.838304								366295
		956		461.294	2.47283	0.850906								218236
		957		257.212	4.22253	0.773513								247303
		958		257.212	2.75161	0.748266								362813
		959		313.094	3.06215	0.795128								121724
		960		573.219	13.5802	0.853026								317701
		961		136.034	7.66887	0.81955								385107
		962		136.035	8.66523	0.812301								9530.92
		963		217.108	7.09758	0.7701								213393
		964		207.012	2.32803	0.855586								308779
		965		266.089	7.61718	0.799765								371901
		966		266.089	8.64546	0.822896								16625.5
		967		365.231	2.44795	0.855226								376054
		968		244.166	13.4351	0.854777								359446
		969		244.166	13.755	0.832946								359446
		970		350.209	2.48217	0.8514								278465
		971		350.208	2.08667	0.824913								394329
		972		554.346	7.09439	0.854199								303952
		973		148.007	11.2583	0.841191								321068
		974		148.007	10.3767	0.813002								16773.7
		975		389.077	2.62931	0.854719								218360
		976		425.123	13.0154	0.717709								377325
		977		156.066	12.2415	0.727774								378494
		978		234.888	13.8499	0.854657								333011
		979		252.788	2.46972	0.847221								229806
		980		337.201	2.50087	0.850054								91358.1
		981		227.108	2.7328	0.85503								325342
		982		89.0373	13.0154	0.667041								2.36085e+06
		983		279.004	7.04983	0.663122								372566
		984		249.087	3.96799	0.816493								5389.59
		985		404.152	13.5517	0.854293								306439
		986		156.781	13.8719	0.853267								228561
		987		597.084	13.8781	0.853856								383968
		988		132.075	4.20065	0.774369								416061
		989		132.075	2.94434	0.812722								56170.9
		990		142.925	4.20378	0.853794								332953
		991		244.014	13.4918	0.854229								357951
		992		454.051	2.79562	0.853845								203083
		993		381.203	2.48528	0.855038								270766
		994		381.203	3.73794	0.823949								11125.4
		995		332.849	13.8437	0.855899								333659
		996		444.033	13.7681	0.826767								290717
		997		246.029	13.006	0.853382								361056
		998		89.0464	13.0122	0.855682								377986
		999		281.196	2.4324	0.854696								365154
		1000		207.03	11.8543	0.840697								346439
		1001		95.9523	13.8405	0.835554								162316
		1002		95.9523	7.2157	0.74388								375816
		1003		88.0326	13.0342	0.855104								458311
		1004		227.96	13.495	0.854563								348858
		1005		227.96	10.8452	0.820153								76150
		1006		227.96	11.1421	0.726654								76150
		1007		250.068	11.2937	0.854514								343752
		1008		489.325	2.42928	0.854709								282811
		1009		334.202	2.68264	0.852022								302708
		1010		334.202	4.19752	0.848369								205690
		1011		121.016	4.2069	0.851431								110415
		1012		132.049	13.4035	0.854215								346589
		1013		132.049	11.2453	0.820971								22404.3
		1014		88.0633	13.006	0.852028								104846
		1015		212.015	7.11986	0.834994								333310
		1016		212.016	6.12353	0.496193								14904.4
		1017		126.056	7.19649	0.704207								368162
		1018		216.919	13.8499	0.785239								351542
		1019		302.073	13.2699	0.797924								293172
		1020		302.073	11.9191	0.753599								357628
		1021		302.073	12.7897	0.710838								341114
		1022		300.08	2.65131	0.853222								446694
		1023		207.077	8.94792	0.85449								369073
		1024		132.049	7.1901	0.832084								44391.9
		1025		243.179	5.26853	0.704957								104243
		1026		253.131	11.255	0.839283								334381
		1027		254.799	2.46972	0.854365								245422
		1028		280.997	11.8153	0.77737								357568
		1029		280.997	11.3646	0.765542								303188
		1030		246.974	13.5107	0.853442								305337
		1031		374.212	4.22253	0.852131								272414
		1032		344.289	4.09643	0.780904								16123
		1033		180.921	13.8499	0.853718								324283
		1034		203.067	13.7227	0.853991								339709
		1035		203.067	11.3001	0.848012								216719
		1036		292.016	13.1014	0.853795								303684
		1037		263.044	6.41288	0.85353								344275
		1038		221.082	2.59474	0.820145								339227
		1039		314.109	11.2937	0.853368								293825
		1040		70.439	2.42928	0.851011								307188
		1041		254.092	2.4884	0.853507								321704
		1042		580.641	13.8468	0.853057								248602
		1043		404.783	13.8499	0.853266								316954
		1044		304.236	2.49151	0.854191								223893
		1045		142.926	2.82391	0.731739								195688
		1046		328.058	13.4856	0.854468								291304
		1047		314.896	13.8593	0.800498								324303
		1048		121.171	4.20691	0.851864								204777
		1049		146.028	7.11031	0.820142								1.20391e+06
		1050		146.028	13.5044	0.82146								212911
		1051		146.028	8.73767	0.681799								183420
		1052		371.317	2.56026	0.854307								307139
		1053		371.317	3.86764	0.829449								32248.5
		1054		215.14	7.16453	0.853982								340360
		1055		215.148	4.20378	0.852026								280297
		1056		215.148	2.81134	0.743591								178454
		1057		160.106	4.22253	0.829566								272693
		1058		160.106	7.1135	0.799632								39602.2
		1059		160.106	3.81253	0.637819								272531
		1060		184.971	13.5076	0.853331								280907
		1061		254.891	13.9222	0.819349								273412
		1062		282.401	2.44173	0.856111								668579
		1063		292.134	13.3719	0.853396								332770
		1064		303.145	7.09439	0.816883								76453
		1065		303.145	7.44231	0.784702								76453
		1066		188.035	6.5913	0.854547								341115
		1067		217.119	14.4336	0.850792								338869
		1068		217.119	8.88545	0.775133								238322
		1069		217.119	9.26215	0.536581								244910
		1070		328.071	13.0123	0.646789								293792
		1071		269.092	16.7928	0.854923								310211
		1072		88.0524	13.0028	0.822373								374520
		1073		581.365	7.10076	0.854082								279989
		1074		298.046	2.63248	0.844508								167959
		1075		157.062	9.18367	0.683912								88370.7
		1076		157.2	13.897	0.854382								228575
		1077		495.256	7.10395	0.853096								267380
		1078		165.061	7.74991	0.838862								323814
		1079		162.049	13.0499	0.701781								321203
		1080		247.072	2.39184	0.855041								278899
		1081		247.072	3.44095	0.829621								18624.6
		1082		243.976	13.5013	0.854737								295130
		1083		500.11	13.8531	0.854475								329544
		1084		500.111	14.8316	0.812268								6679.32
		1085		181.05	12.425	0.831652								346107
		1086		322.091	13.6781	0.854021								293226
		1087		116.979	13.3084	0.849163								334807
		1088		116.978	13.9033	0.847945								116908
		1089		307.126	13.6118	0.853366								291936
		1090		329.233	8.03322	0.834414								77158.3
		1091		365.139	2.35371	0.812693								313261
		1092		365.137	11.2937	0.831863								54205.3
		1093		236.988	13.5264	0.853152								296881
		1094		580.652	13.8562	0.853541								285387
		1095		578.01	13.9033	0.853182								225239
		1096		387.14	13.7004	0.853631								242339
		1097		328.257	2.44173	0.855369								226952
		1098		521.082	2.55722	0.853468								150516
		1099		402.165	13.5644	0.855591								282079
		1100		484.672	13.8531	0.852436								232984
		1101		222.077	7.46178	0.854771								319808
		1102		258.182	12.9934	0.78127								304099
		1103		258.182	11.8705	0.821754								49089.4
		1104		258.182	13.3656	0.815327								302456
		1105		261.069	2.70146	0.854144								301524
		1106		481.164	13.3719	0.853372								314656
		1107		282.756	2.44795	0.850417								261972
		1108		133.087	4.35331	0.83349								206487
		1109		555.313	3.06532	0.853997								278469
		1110		187.025	13.072	0.849491								169372
		1111		187.025	13.919	0.794919								272515
		1112		175.097	8.50345	0.84078								101437
		1113		245.114	13.0185	0.800395								287934
		1114		245.114	12.655	0.841402								287934
		1115		229.083	13.7195	0.845466								57909.6
		1116		314.11	13.3656	0.810737								26991.1
		1117		96.9696	14.2078	0.755164								1.28544e+07
		1118		442.017	14.2656	0.765482								279233
		1119		155.976	13.0311	0.85304								295365
		1120		229.08	13.0091	0.822518								279918
		1121		612.955	13.8531	0.852813								256386
		1122		477.032	13.8531	0.853431								228024
		1123		88.1479	13.0311	0.854592								249980
		1124		162.041	13.6275	0.848767								278752
		1125		162.039	7.61072	0.830487								90627.8
		1126		162.042	8.29539	0.799246								90058.2
		1127		162.041	16.2783	0.553678								76701.5
		1128		173.986	13.0154	0.853055								287544
		1129		353.948	13.8907	0.852648								260112
		1130		152.996	9.72964	0.790446								318441
		1131		135.018	13.5391	0.854999								318629
		1132		160.108	7.6172	0.845224								8789.86
		1133		299.149	2.09622	0.846772								297997
		1134		136.914	13.8437	0.852968								273069
		1135		196.941	13.8625	0.853617								281227
		1136		186.017	13.8625	0.85252								283442
		1137		186.017	13.0091	0.842814								110798
		1138		359.125	13.1272	0.841377								39083.6
		1139		359.125	12.5432	0.839327								24256.3
		1140		281.2	2.43862	0.854749								512329
		1141		218.086	13.5897	0.853182								257669
		1142		470.761	13.8844	0.853489								269173
		1143		411.206	2.67011	0.852244								190342
		1144		88.0311	13.0248	0.855007								509712
		1145		147.045	4.08371	0.841148								135584
		1146		147.045	8.8559	0.778411								301534
		1147		492.836	13.9096	0.852485								254189
		1148		599.131	2.51333	0.853658								165604
		1149		133.087	13.6402	0.852632								275539
		1150		311.287	2.4106	0.853649								226079
		1151		149.035	4.20378	0.834536								71655.2
		1152		149.035	13.7259	0.825812								312140
		1153		230.148	2.60103	0.853639								264503
		1154		230.148	3.90011	0.829132								30234.1
		1155		368.816	13.8437	0.85366								233268
		1156		373.169	2.08028	0.85372								248572
		1157		244.155	7.10076	0.848483								174560
		1158		244.155	4.22253	0.834333								233406
		1159		244.155	2.89349	0.832265								64967
		1160		288.226	4.22253	0.812416								186588
		1161		376.074	2.60103	0.852594								188758
		1162		544.683	13.8499	0.853159								254831
		1163		137.038	7.66243	0.836358								5476.73
		1164		356.903	13.9064	0.854441								227428
		1165		283.228	2.54773	0.852582								275436
		1166		327.108	7.61396	0.837672								36055.9
		1167		230.052	12.9966	0.853026								278175
		1168		290.935	13.9253	0.852378								259667
		1169		307.061	7.60103	0.821244								293358
		1170		223.056	14.1726	0.853456								285010
		1171		391.198	7.09122	0.844189								33320.9
		1172		277.115	13.394	0.852595								275629
		1173		160.968	13.9064	0.804654								272673
		1174		152.927	13.8499	0.852674								264725
		1175		280.167	7.09122	0.852353								256586
		1176		152.996	13.596	0.830033								60858.5
		1177		219.099	11.2937	0.840383								284940
		1178		254.148	2.70146	0.852926								263928
		1179		254.148	4.17247	0.840702								84785.7
		1180		233.125	16.7675	0.853531								289316
		1181		158.043	13.0248	0.853111								250401
		1182		232.939	13.5296	0.85331								231483
		1183		220.025	7.06579	0.825587								265248
		1184		137.02	2.92526	0.851248								171989
		1185		244.084	13.5897	0.840755								64862
		1186		244.084	9.06904	0.730383								285359
		1187		244.084	14.3497	0.792926								35047.8
		1188		555.313	7.10076	0.849289								180616
		1189		88.0477	13.0028	0.854375								354788
		1190		279.092	4.87406	0.852112								287711
		1191		606.287	13.6181	0.852862								236821
		1192		120.055	13.0091	0.770358								274641
		1193		374.212	2.86807	0.842673								94370.5
		1194		293.029	13.0122	0.854767								236648
		1195		257.155	2.64503	0.854639								189228
		1196		257.155	3.79952	0.828445								16821.7
		1197		581.349	16.7706	0.852814								272317
		1198		148.052	13.4981	0.787744								266970
		1199		294.12	11.9645	0.795126								281729
		1200		293.918	13.8593	0.852753								216639
		1201		487.178	13.8844	0.852997								140906
		1202		258.241	2.46972	0.854848								401695
		1203		437.249	2.43862	0.853027								202323
		1204		140.083	13.6244	0.853283								285301
		1205		176.064	11.9612	0.677778								185924
		1206		176.064	13.006	0.642291								269985
		1207		230.126	14.5016	0.790504								247624
		1208		214.057	9.89904	0.853536								291875
		1209		618.597	13.8468	0.851952								190420
		1210		310.012	13.8123	0.853281								246627
		1211		113.926	13.0154	0.774592								259368
		1212		113.926	11.958	0.807433								18877.5
		1213		113.926	13.4003	0.730906								301928
		1214		212.09	9.82087	0.728562								273725
		1215		212.09	9.3405	0.701859								185577
		1216		316.084	13.5013	0.853244								220946
		1217		173.065	10.3407	0.811654								83980.6
		1218		173.065	11.2679	0.773272								271416
		1219		173.065	9.38298	0.801549								30218.9
		1220		107.036	1.87069	0.840436								63999.8
		1221		215.052	13.6149	0.852927								247565
		1222		219.062	13.6212	0.853843								257299
		1223		247.17	2.58532	0.853651								184681
		1224		556.317	7.09122	0.853582								210296
		1225		243.224	2.48217	0.851427								199786
		1226		550.878	13.9001	0.852912								211007
		1227		299.097	13.394	0.854564								254782
		1228		282.02	13.9064	0.852291								132065
		1229		236.1	16.777	0.853229								261392
		1230		275.056	12.9997	0.847087								222228
		1231		275.054	11.9191	0.827019								33746.7
		1232		715.511	4.23192	0.852482								232918
		1233		715.511	3.0399	0.850519								163854
		1234		452.072	2.63558	0.853005								153178
		1235		570.277	7.09439	0.852716								239142
		1236		431.226	2.0707	0.768499								12686.5
		1237		319.027	13.3339	0.854964								248408
		1238		319.028	14.1631	0.828584								22136.6
		1239		301.266	2.63247	0.853532								260722
		1240		633.127	14.1918	0.854212								247082
		1241		145.248	13.3877	0.852662								162796
		1242		236.174	2.51959	0.853016								214374
		1243		366.837	13.8625	0.853185								234714
		1244		506.746	13.8593	0.853216								253819
		1245		574.999	13.8468	0.853792								213138
		1246		214.039	13.0154	0.85289								249167
		1247		302.221	2.46665	0.85254								170999
		1248		292.821	13.8531	0.853361								240725
		1249		262.096	2.32158	0.851892								196155
		1250		262.093	12.9997	0.838515								44366.5
		1251		303.035	13.755	0.855149								199753
		1252		583.328	16.7833	0.853074								264575
		1253		380.255	2.4324	0.853693								201913
		1254		144.973	13.9032	0.853502								237209
		1255		304.192	2.5227	0.850578								244878
		1256		304.192	3.70227	0.830934								26528.4
		1257		301.115	13.5076	0.853968								239064
		1258		173.346	16.7897	0.79057								175060
		1259		280.05	13.3719	0.852935								241238
		1260		344.04	11.3001	0.853742								235287
		1261		233.078	13.517	0.853472								204896
		1262		270.207	2.57278	0.851551								241480
		1263		270.207	2.96343	0.846627								259094
		1264		484.813	13.8813	0.852621								206652
		1265		604.007	13.9127	0.853017								237538
		1266		387.185	2.08028	0.852453								230357
		1267		583.345	3.06532	0.854429								221594
		1268		88.0618	13.0185	0.849822								37465.8
		1269		161.065	10.7571	0.692317								204877
		1270		256.106	2.46661	0.853608								323155
		1271		695.44	16.7738	0.852289								259261
		1272		439.086	13.8907	0.849948								209307
		1273		439.086	14.8153	0.848671								110048
		1274		289.123	13.4572	0.853534								252383
		1275		274.141	14.1279	0.831021								261049
		1276		143.09	4.20377	0.853468								231124
		1277		132.046	2.80192	0.824629								239935
		1278		131.054	9.03637	0.854507								264141
		1279		131.054	12.6911	0.81176								12819.8
		1280		529.28	2.80506	0.853039								213493
		1281		256.367	2.47283	0.853817								291880
		1282		238.859	13.9348	0.802783								248868
		1283		196.059	12.2382	0.702218								253352
		1284		196.059	11.9612	0.692812								253352
		1285		327.191	2.08348	0.852883								229644
		1286		463.978	13.9826	0.852565								229466
		1287		217.007	11.284	0.851945								246571
		1288		327.087	13.0122	0.686291								233998
		1289		143.125	4.20377	0.853615								216577
		1290		146.046	4.09965	0.811335								327334
		1291		354.061	13.9475	0.836709								250329
		1292		116.031	11.2195	0.852041								230245
		1293		146.046	2.83018	0.74309								231182
		1294		255.59	2.34088	0.853451								188774
		1295		376.022	13.973	0.852753								218525
		1296		163.113	2.62617	0.832827								149201
		1297		556.326	3.07168	0.853977								219275
		1298		700.978	13.9222	0.847451								166865
		1299		108.022	2.92209	0.797519								158043
		1300		457.369	2.36012	0.852524								223315
		1301		523.287	7.09439	0.853534								225091
		1302		202.033	13.0154	0.852684								234966
		1303		497.182	13.8844	0.854088								158504
		1304		497.182	14.8088	0.828552								19470.6
		1305		410.909	13.9001	0.851737								204037
		1306		135.066	8.07241	0.834542								75939.2
		1307		135.066	7.51368	0.781023								242282
		1308		417.211	2.06114	0.848207								235963
		1309		214.153	2.82076	0.761784								163293
		1310		205.083	11.7991	0.81897								252955
		1311		177.077	7.17411	0.711238								228468
		1312		239.023	13.473	0.854279								229319
		1313		281.159	2.05476	0.821568								217023
		1314		309.153	2.13141	0.852217								220501
		1315		189.06	13.2663	0.852749								238996
		1316		87.0217	1.89646	0.804741								9655.53
		1317		147.049	9.9904	0.796758								215577
		1318		147.049	11.2486	0.81864								26044.8
		1319		287.079	4.33721	0.854795								236762
		1320		272.836	13.8531	0.854341								669851
		1321		255.189	2.47594	0.845817								199972
		1322		613.151	14.195	0.85399								215863
		1323		300.026	2.94752	0.848094								136515
		1324		300.026	2.68892	0.85061								136515
		1325		249.58	2.35692	0.854764								230058
		1326		256.095	13.5802	0.852474								173394
		1327		818.555	4.37907	0.851537								237348
		1328		120.888	4.21003	0.84105								203224
		1329		191.103	14.1886	0.851519								225797
		1330		191.104	16.2423	0.806938								15340.9
		1331		242.065	10.5771	0.852502								245004
		1332		350.181	13.6433	0.852794								202268
		1333		369.121	11.8607	0.853564								229097
		1334		310.021	13.7681	0.854002								194425
		1335		90.047	13.0091	0.727177								202883
		1336		302.055	13.0154	0.662308								206325
		1337		302.055	2.67011	0.597903								185965
		1338		481.426	2.5071	0.853665								166370
		1339		190.936	14.1918	0.806333								238538
		1340		190.936	16.3508	0.828351								10287.1
		1341		306.171	4.21315	0.852895								207486
		1342		232.059	8.81326	0.852707								246264
		1343		167.02	2.64817	0.84883								187248
		1344		167.02	3.07488	0.681645								197474
		1345		293.151	7.09122	0.854526								203327
		1346		129.014	7.02746	0.852693								193679
		1347		656.553	13.8437	0.852317								181869
		1348		409.311	2.43862	0.843559								74179.4
		1349		389.094	2.56342	0.852248								83557.6
		1350		373.1	2.59789	0.85378								150273
		1351		146.054	7.15494	0.741464								211418
		1352		506.888	13.897	0.8524								158119
		1353		172.023	13.0028	0.852668								217523
		1354		306.171	2.77992	0.849269								150735
		1355		377.086	13.8813	0.852665								112313
		1356		377.086	14.8186	0.834859								42516.9
		1357		150.017	10.3505	0.827761								34031.8
		1358		441.072	13.8468	0.852899								100504
		1359		142.884	4.20378	0.852077								135883
		1360		285.065	2.67638	0.853339								146416
		1361		143.97	13.897	0.853114								201556
		1362		295.906	13.9064	0.852589								191146
		1363		212.044	13.7419	0.854173								207395
		1364		323.169	2.1058	0.853173								214698
		1365		235.076	14.2882	0.853428								219610
		1366		296.267	2.42928	0.854415								156903
		1367		286.081	13.6749	0.85263								198883
		1368		228.16	6.54592	0.77263								224020
		1369		228.16	2.74848	0.710625								202663
		1370		459.278	2.49152	0.853019								134844
		1371		650.911	13.8531	0.852387								174830
		1372		152.029	9.0135	0.852789								227790
		1373		147.066	7.10713	0.779031								3.01311e+06
		1374		247.033	13.0374	0.841834								22510.9
		1375		222.044	8.79354	0.853045								225835
		1376		222.036	13.0279	0.852588								211980
		1377		82.9541	2.41058	0.849814								163622
		1378		171.03	10.3374	0.820933								59437.1
		1379		171.03	11.2647	0.824957								27483.2
		1380		171.03	10.8943	0.797333								26138.5
		1381		528.803	13.8625	0.852502								206580
		1382		246.146	14.0826	0.829834								194303
		1383		246.146	14.3432	0.745106								194303
		1384		243.046	7.06897	0.761338								228607
		1385		112.955	7.25124	0.753382								237444
		1386		525.112	2.5446	0.851996								145175
		1387		402.011	14.1758	0.766311								214392
		1388		319.133	4.23192	0.852912								172733
		1389		319.133	3.09081	0.82727								19985.4
		1390		319.133	3.62132	0.791658								17769.6
		1391		231.135	4.24132	0.852303								148943
		1392		231.135	3.00804	0.833388								25755.1
		1393		244.2	4.22879	0.850244								121197
		1394		255.292	2.47594	0.852089								132861
		1395		119.048	13.0154	0.719077								175658
		1396		298.861	13.9316	0.819852								178654
		1397		332.858	13.8374	0.852928								193458
		1398		139.976	13.9001	0.793495								197591
		1399		175.025	12.9525	0.849323								198916
		1400		175.027	7.17412	0.814494								27242.4
		1401		281.045	13.9954	0.853824								207577
		1402		146.027	13.5044	0.854045								234227
		1403		242.07	7.5849	0.851943								172839
		1404		242.07	2.37287	0.849526								178727
		1405		242.07	4.22879	0.847449								144471
		1406		242.07	3.39274	0.721915								10065
		1407		235.079	17.1155	0.842946								31430.5
		1408		235.079	16.6876	0.754992								34546.8
		1409		396.857	13.9095	0.852534								160715
		1410		405.108	13.8813	0.849783								114482
		1411		405.108	14.8218	0.837247								201386
		1412		158.028	4.21941	0.832028								171909
		1413		158.028	7.11043	0.814348								25533.2
		1414		158.028	4.86435	0.704218								60293.9
		1415		245.071	11.8121	0.850294								219226
		1416		245.071	11.3744	0.845537								190472
		1417		176.095	13.6339	0.85228								199074
		1418		318.076	13.2663	0.85106								164267
		1419		205.065	2.5728	0.851362								280003
		1420		332.676	2.06114	0.85259								165661
		1421		316.854	13.8531	0.85259								210170
		1422		259.079	12.9997	0.852683								184306
		1423		222.036	10.5574	0.82285								32407.4
		1424		178.044	13.3656	0.686492								175254
		1425		253.276	2.48217	0.851391								145462
		1426		247.041	7.14537	0.758444								206378
		1427		281.178	2.4324	0.855567								303762
		1428		122.025	13.4445	0.667366								169973
		1429		228.036	13.5044	0.852939								200359
		1430		470.78	13.8813	0.852636								135155
		1431		115.208	4.26037	0.847968								87259.8
		1432		88.0271	13.0028	0.852216								196541
		1433		95.0332	13.4161	0.853761								187267
		1434		202.072	7.2221	0.849757								197470
		1435		87.0345	3.0144	0.786851								29158.2
		1436		209.041	13.5233	0.852839								170130
		1437		366.827	13.8311	0.852541								187789
		1438		204.019	13.0248	0.852257								192720
		1439		281.073	13.006	0.852603								195235
		1440		424.247	7.09758	0.852406								149728
		1441		278.929	13.9285	0.853678								212543
		1442		336.836	13.9222	0.853139								126212
		1443		188.137	2.73593	0.850602								182126
		1444		198.158	2.61046	0.853413								199407
		1445		198.158	2.17638	0.838739								121945
		1446		198.158	3.92906	0.783833								16732.7
		1447		147.068	13.3845	0.840494								206002
		1448		100.946	2.00008	0.853999								208974
		1449		190.051	8.9512	0.854233								206995
		1450		117.083	3.01759	0.843194								42617.9
		1451		117.083	4.22878	0.775696								162417
		1452		332.078	13.6433	0.852051								169680
		1453		452.92	13.8844	0.852866								143455
		1454		157.009	13.9064	0.830738								113163
		1455		144.876	13.3877	0.852359								176122
		1456		243.053	2.58856	0.822182								84702.9
		1457		171.377	2.66384	0.850757								164893
		1458		623.49	2.50087	0.851076								159517
		1459		216.168	2.62304	0.850125								168443
		1460		216.168	2.96024	0.839812								168443
		1461		190.882	13.8499	0.852278								145995
		1462		195.936	13.8562	0.852883								161748
		1463		261.098	11.2937	0.79945								28689.6
		1464		387.275	2.69519	0.85414								196310
		1465		421.075	14.3917	0.802932								202912
		1466		454.88	13.8938	0.853415								159366
		1467		522.331	16.7738	0.852499								185688
		1468		159.939	13.0091	0.654101								87370.4
		1469		448.161	2.77991	0.852768								156660
		1470		282.157	15.248	0.774585								203201
		1471		282.157	14.7468	0.704212								90034.1
		1472		155.083	4.23192	0.786338								126642
		1473		143.09	2.82705	0.8475								173807
		1474		313.294	2.52895	0.853316								125624
		1475		109.992	8.77386	0.852511								196127
		1476		198.113	7.09758	0.787409								162489
		1477		148.07	7.09758	0.849085								192472
		1478		506.992	14.2174	0.847621								180881
		1479		119.05	4.14392	0.839572								93379.6
		1480		119.05	2.76418	0.754746								208988
		1481		119.05	10.7571	0.799661								25191
		1482		119.05	8.86575	0.736905								10552.4
		1483		209.085	2.08985	0.852331								200191
		1484		88.0505	13.0248	0.851159								246839
		1485		229.044	13.3814	0.852221								166032
		1486		283.078	10.0492	0.689302								188339
		1487		298.88	13.919	0.852387								160066
		1488		219.045	11.8056	0.851467								209015
		1489		219.045	11.3711	0.84137								171675
		1490		645.034	13.7713	0.852454								166383
		1491		293.486	14.2302	0.850793								166733
		1492		468.257	14.7533	0.852145								196258
		1493		318.131	11.2969	0.852449								168767
		1494		523.287	3.07486	0.849541								40965.9
		1495		251.148	2.05794	0.847661								133325
		1496		261.134	7.09122	0.626277								84474.6
		1497		244.065	7.60749	0.846868								198966
		1498		411.165	13.5739	0.852842								186822
		1499		89.013	5.00651	0.693233								120178
		1500		147.066	8.74097	0.673017								700510
		1501		145.816	13.5139	0.85244								114449
		1502		600.323	7.09758	0.852087								168426
		1503		281.299	2.44173	0.854489								452796
		1504		313.275	2.58532	0.853266								168269
		1505		313.275	2.30549	0.832184								168269
		1506		388.835	13.8719	0.85231								174763
		1507		98.0611	7.88651	0.839517								133924
		1508		98.0611	7.16134	0.820936								51492.6
		1509		98.0612	9.50402	0.806734								20988.3
		1510		193.05	2.26672	0.798623								75907.7
		1511		331.046	13.4918	0.854161								165433
		1512		331.043	11.255	0.825795								19414.7
		1513		146.101	16.9156	0.852869								202287
		1514		402.322	2.87123	0.854221								167889
		1515		171.047	13.0154	0.852353								176791
		1516		547.121	13.9602	0.851865								169917
		1517		386.033	13.5233	0.851939								173459
		1518		543.257	7.10713	0.851714								166339
		1519		791.527	4.41452	0.849496								180815
		1520		791.527	3.06532	0.841807								165525
		1521		291.145	2.13461	0.839345								80348
		1522		291.145	7.09759	0.824873								44396.3
		1523		687.48	3.0399	0.850073								142041
		1524		687.48	4.24448	0.851162								136651
		1525		302.985	3.06851	0.848808								124672
		1526		233.078	11.4558	0.846272								81945
		1527		272.088	13.5013	0.851428								138317
		1528		272.089	14.179	0.815503								26955.7
		1529		608.079	13.7483	0.852528								174688
		1530		196.036	14.1854	0.845306								97012.1
		1531		92.0434	7.09124	0.851838								175571
		1532		281.089	7.27036	0.854071								185063
		1533		281.088	4.90314	0.833265								10103.2
		1534		468.237	7.09758	0.851988								147492
		1535		311.938	13.8938	0.852502								160472
		1536		256.2	2.62931	0.853892								152040
		1537		588.834	13.8907	0.852539								125294
		1538		159.041	11.5376	0.78932								172482
		1539		555.127	14.195	0.853683								177184
		1540		337.185	2.09303	0.851765								158346
		1541		430.159	2.77992	0.852578								156746
		1542		253.26	2.49151	0.85318								205006
		1543		238.189	2.51647	0.850331								106912
		1544		538.056	13.8531	0.852397								116725
		1545		373.1	13.694	0.852908								169000
		1546		159.973	13.8907	0.852667								126955
		1547		267.197	2.28287	0.851472								177158
		1548		267.197	2.62616	0.841894								177158
		1549		240.952	13.8844	0.852784								156137
		1550		432.815	13.9127	0.852207								131776
		1551		522.284	3.07486	0.852684								163864
		1552		114.056	16.8056	0.62368								177964
		1553		170.901	2.67638	0.851296								159643
		1554		106.014	13.3877	0.85228								120199
		1555		132.998	13.5581	0.838013								18390.5
		1556		336.17	7.09439	0.852628								145693
		1557		134.061	2.86491	0.844265								123795
		1558		327.233	2.37926	0.852318								150042
		1559		582.649	13.8656	0.852645								138956
		1560		117.069	11.2098	0.747248								177145
		1561		408.241	16.7643	0.852286								150259
		1562		432.824	13.8719	0.8524								158315
		1563		429.85	13.8719	0.852389								124761
		1564		461.182	2.92843	0.852175								175579
		1565		374.045	2.67008	0.817394								94406
		1566		598.308	7.09439	0.852351								157431
		1567		88.0249	12.9997	0.85151								152378
		1568		197.022	13.577	0.817283								159101
		1569		274.06	7.24138	0.835652								62077.9
		1570		274.061	11.197	0.802015								181639
		1571		192.059	12.088	0.831424								32903
		1572		192.059	13.0248	0.773501								144995
		1573		349.206	2.08666	0.84482								1.92462e+06
		1574		211.113	2.63562	0.853071								150592
		1575		146.09	4.21628	0.850197								151090
		1576		146.09	2.88408	0.81928								40599.5
		1577		492.855	13.8938	0.850617								144652
		1578		309.156	2.83018	0.850911								134430
		1579		87.8752	13.0091	0.852873								131439
		1580		258.945	13.9033	0.851811								150369
		1581		356.922	13.8907	0.851735								141419
		1582		175.105	16.7802	0.852565								146503
		1583		788.545	4.42096	0.848413								170050
		1584		788.545	3.08124	0.73031								142683
		1585		428.325	2.74848	0.851595								149004
		1586		330.04	13.0091	0.840793								68210.6
		1587		330.04	11.2582	0.774929								171345
		1588		605.073	14.1214	0.852205								162688
		1589		244.163	2.62618	0.852239								135063
		1590		244.163	4.08371	0.769946								19639
		1591		210.025	4.9645	0.853438								169932
		1592		435.252	7.09759	0.8528								171926
		1593		220.098	2.9348	0.837977								38914
		1594		295.134	2.52895	0.85336								116805
		1595		192.053	9.26867	0.852668								177954
		1596		205.072	12.9682	0.665184								152488
		1597		231.955	13.5612	0.851846								151071
		1598		117.919	13.0185	0.847288								137697
		1599		117.919	13.3972	0.840369								142382
		1600		454.899	13.9033	0.849829								145282
		1601		403.555	13.5107	0.853055								153314
		1602		517.353	2.66071	0.852134								130303
		1603		299.209	7.89951	0.833573								176990
		1604		144.03	7.51043	0.700673								147727
		1605		165.108	2.83962	0.83459								109108
		1606		233.078	9.46805	0.852291								176526
		1607		497.272	7.09441	0.852575								167500
		1608		149.045	11.2808	0.798081								173415
		1609		181.976	13.5107	0.852127								126339
		1610		238.065	13.0721	0.851715								147227
		1611		360.985	13.9159	0.79578								125112
		1612		567.052	13.9253	0.852655								139124
		1613		498.171	2.35371	0.853069								157651
		1614		498.171	3.36383	0.835441								10072
		1615		157.013	7.65593	0.849273								188587
		1616		157.012	8.88217	0.815107								41673.8
		1617		233.896	13.8437	0.852328								155590
		1618		136.912	13.8374	0.852264								141759
		1619		428.325	4.22879	0.851953								110678
		1620		88.0538	13.0154	0.850799								165960
		1621		173.101	7.09122	0.851951								135456
		1622		262.07	10.7539	0.851967								169304
		1623		247.97	13.5044	0.786387								150267
		1624		274.998	11.3033	0.852289								149156
		1625		306.071	14.1886	0.853382								155669
		1626		118.076	11.2324	0.853086								167654
		1627		227.071	16.239	0.852862								165564
		1628		204.132	4.21003	0.85132								129688
		1629		204.132	2.82705	0.849314								97294.5
		1630		133.063	13.5422	0.853347								183285
		1631		314.209	7.09758	0.852699								120024
		1632		427.025	14.005	0.848476								158602
		1633		96.9866	13.8405	0.841137								50899.6
		1634		214.955	13.9127	0.850881								124069
		1635		320.157	13.6275	0.852324								166507
		1636		298.06	13.006	0.685335								130629
		1637		276.128	14.0115	0.852581								148679
		1638		537.063	13.8844	0.852405								119460
		1639		142.884	2.82076	0.852506								123262
		1640		542.695	13.8562	0.851022								130041
		1641		70.946	6.75671	0.851478								160221
		1642		97.0616	13.8687	0.85535								405642
		1643		272.828	13.8593	0.852242								152187
		1644		349.054	14.2624	0.800629								164923
		1645		236.065	13.5139	0.776101								70265.2
		1646		483.152	2.36971	0.85251								139048
		1647		483.151	3.34778	0.834851								9967.44
		1648		143.088	4.2069	0.846416								129930
		1649		672.986	13.8499	0.851336								121648
		1650		143.331	4.20066	0.850781								117053
		1651		74.9907	2.57606	0.849365								113729
		1652		143.091	4.21316	0.852535								187906
		1653		197.043	7.46827	0.793112								191370
		1654		266.088	14.2046	0.851269								145781
		1655		530.283	7.09441	0.850376								126997
		1656		256.155	2.88713	0.703558								77646.7
		1657		328.294	2.54147	0.852997								156090
		1658		328.294	3.91621	0.82257								8672.24
		1659		319.037	14.1758	0.852787								151776
		1660		494.252	3.0685	0.852065								139214
		1661		294.96	13.8939	0.851877								144339
		1662		200.073	13.006	0.852626								139136
		1663		336.818	13.9285	0.85247								139958
		1664		319.1	13.5581	0.853229								135627
		1665		352.868	13.9159	0.851715								103361
		1666		651.521	2.51958	0.852942								146238
		1667		92.0254	7.65593	0.761094								174975
		1668		305.099	7.84745	0.853138								169969
		1669		305.099	13.0028	0.740175								8837.66
		1670		441.082	13.8625	0.849277								74377.5
		1671		273.073	12.984	0.849343								42945
		1672		273.073	12.3955	0.682303								4013.62
		1673		271.155	4.22566	0.836714								128729
		1674		133.07	11.2969	0.851986								155268
		1675		604.705	13.8719	0.851954								132685
		1676		444.023	13.8374	0.851393								110552
		1677		242.148	2.18283	0.853165								157712
		1678		131.035	13.2337	0.817788								1.33886e+06
		1679		664.117	13.4161	0.851719								130141
		1680		303.131	13.8343	0.849756								84366.4
		1681		303.131	11.8672	0.83962								41808.6
		1682		281.979	13.8437	0.819384								98711.3
		1683		439.096	14.1567	0.852799								140168
		1684		243.171	3.03034	0.824861								103264
		1685		821.283	2.55086	0.852233								79725.3
		1686		640.96	13.9127	0.852549								126473
		1687		487.343	2.77048	0.852457								126655
		1688		326.27	2.4822	0.84831								75358.9
		1689		158.054	10.203	0.84042								60209.3
		1690		700.058	13.9158	0.851179								149312
		1691		475.111	13.5013	0.852205								138694
		1692		223.064	14.1758	0.830297								48900.2
		1693		223.065	3.06532	0.78711								130453
		1694		174.062	13.6339	0.850541								58297.1
		1695		390.798	13.8531	0.851268								122233
		1696		314.98	13.8719	0.847528								129013
		1697		336.971	13.897	0.850646								125059
		1698		301.06	2.88078	0.850777								88768.2
		1699		602.726	13.8656	0.852012								126870
		1700		131.048	9.03965	0.838849								21102.4
		1701		214.976	13.394	0.851072								143633
		1702		443.317	2.82077	0.849186								113504
		1703		139.051	5.73644	0.711236								148285
		1704		196.926	13.9316	0.744024								134206
		1705		328.89	13.9127	0.849104								90208.2
		1706		156.961	13.9158	0.850636								80249.1
		1707		421.142	2.77048	0.851308								124050
		1708		146.02	13.5044	0.852096								142765
		1709		202.981	13.495	0.851036								156006
		1710		399.348	3.84171	0.82538								14161.6
		1711		77.0395	4.21628	0.851744								127559
		1712		283.137	2.11539	0.851702								118692
		1713		245.987	13.3877	0.85238								162718
		1714		213.013	13.656	0.809811								104834
		1715		213.013	11.1486	0.690405								168619
		1716		213.013	10.8354	0.627886								168619
		1717		247.119	7.12948	0.800404								49293
		1718		340.125	11.3291	0.851778								135768
		1719		171.077	13.3972	0.708086								139167
		1720		171.077	11.5999	0.757726								23559
		1721		171.077	12.5301	0.655459								97943.6
		1722		328.177	2.30872	0.851471								127024
		1723		156.734	13.897	0.850924								105232
		1724		761.083	13.9033	0.851573								131344
		1725		300.131	13.4383	0.852064								113568
		1726		468.771	13.8437	0.85183								87589.6
		1727		213.049	13.4003	0.853543								127661
		1728		288.131	14.1663	0.846728								132846
		1729		288.131	14.8153	0.846954								94540.9
		1730		401.2	2.07708	0.851977								150833
		1731		253.093	12.1566	0.850519								157861
		1732		253.093	11.5966	0.838813								64815.8
		1733		494.815	13.9159	0.850502								117161
		1734		184.974	13.5107	0.852227								110720
		1735		472.759	13.8875	0.852047								105992
		1736		189.088	11.3387	0.750436								150663
		1737		260.976	14.411	0.744111								128457
		1738		260.976	16.0909	0.492924								49966.3
		1739		563.218	2.58221	0.850752								106479
		1740		191.987	13.4887	0.849796								124341
		1741		191.987	14.1085	0.834442								37166.7
		1742		191.987	14.3012	0.736573								29445.1
		1743		521.151	13.7036	0.851831								110524
		1744		210.077	8.84279	0.848623								146586
		1745		243.135	7.11986	0.85346								119743
		1746		243.135	6.50038	0.678621								6465.85
		1747		241.05	13.3814	0.852619								122175
		1748		384.012	13.7582	0.850994								134332
		1749		256.111	16.7802	0.848529								137983
		1750		481.257	4.22566	0.851418								94750.9
		1751		96.9689	13.8499	0.852749								1.28544e+07
		1752		348.213	16.7897	0.851536								144775
		1753		328.183	2.07709	0.851792								131904
		1754		144.834	13.3908	0.851135								100264
		1755		145.044	13.3972	0.851049								157014
		1756		371.137	11.8121	0.851661								147427
		1757		371.137	11.3033	0.817334								11441.3
		1758		72.9431	6.66912	0.851363								137034
		1759		758.498	3.0399	0.85271								122366
		1760		614.144	14.1822	0.850826								109261
		1761		658.551	13.8531	0.851212								107365
		1762		292.906	13.8468	0.852278								137919
		1763		189.04	13.0562	0.765286								112311
		1764		75.0777	3.43128	0.844446								101982
		1765		448.846	13.9033	0.852025								98688.7
		1766		205.942	2.07071	0.851734								138909
		1767		167.997	12.9589	0.851946								151121
		1768		210.065	13.6591	0.851708								106595
		1769		160.993	13.8844	0.85188								118791
		1770		453.282	7.09122	0.851866								116516
		1771		302.161	7.10076	0.852432								126650
		1772		143.976	12.9997	0.851366								143900
		1773		143.976	13.5675	0.838387								47894.3
		1774		204.994	7.1358	0.789299								124179
		1775		371.144	12.235	0.849009								33389
		1776		273.069	13.7454	0.852812								141406
		1777		245.039	10.5311	0.741115								145285
		1778		587.979	14.227	0.851289								135484
		1779		147.066	2.80506	0.68238								691767
		1780		161.047	7.59453	0.847151								183843
		1781		301.006	2.90644	0.841752								74683.9
		1782		324.2	3.06532	0.849203								117161
		1783		324.2	4.49201	0.84719								114448
		1784		270.003	13.5896	0.846803								134566
		1785		246.073	13.6654	0.851725								130178
		1786		462.738	13.8625	0.852163								118033
		1787		508.726	13.8593	0.851858								100901
		1788		162.085	4.21316	0.590372								111669
		1789		143.132	4.21627	0.852213								134415
		1790		156.028	13.302	0.851142								138618
		1791		156.028	13.006	0.839095								138618
		1792		281.114	8.4902	0.819519								13665
		1793		274.152	13.8844	0.850273								93834
		1794		274.152	14.1279	0.841659								93834
		1795		918.301	2.56026	0.850839								108817
		1796		401.161	2.94433	0.852291								129906
		1797		168.033	7.58488	0.851687								146852
		1798		583.345	7.1135	0.851935								114854
		1799		74.9396	3.11644	0.845452								106624
		1800		74.9396	3.41843	0.65016								106624
		1801		314.168	2.08667	0.852229								136192
		1802		319.091	13.5802	0.851739								136762
		1803		216.135	14.3723	0.803084								148650
		1804		260.026	14.1822	0.852763								135535
		1805		257.195	2.61361	0.851545								121348
		1806		257.195	4.06435	0.828407								24328.4
		1807		305.064	13.4698	0.850254								134244
		1808		292.115	13.4509	0.851955								109952
		1809		125.001	13.5328	0.852997								126856
		1810		554.346	3.06532	0.852543								109968
		1811		301.023	2.94751	0.84688								85699.9
		1812		323.097	13.4856	0.850079								118711
		1813		323.096	11.7991	0.838546								36770.8
		1814		192.066	5.60623	0.743898								73902.6
		1815		140.033	13.0122	0.850965								128467
		1816		361.138	13.5739	0.849088								119469
		1817		361.135	11.838	0.842686								61073
		1818		257.095	13.6465	0.851376								114295
		1819		117.019	13.3084	0.837937								5.12128e+07
		1820		206.038	14.0278	0.565358								126191
		1821		287.074	13.3846	0.851805								142817
		1822		163.061	4.10601	0.711875								121566
		1823		178.06	16.7643	0.850993								140711
		1824		120.856	4.21316	0.853178								70520.9
		1825		274.063	13.7419	0.852084								121254
		1826		387.115	13.8813	0.850236								116768
		1827		387.115	14.8382	0.837665								41882.6
		1828		426.858	13.8593	0.851117								106307
		1829		294.101	12.9997	0.850094								126962
		1830		294.102	13.4981	0.848801								101798
		1831		102.089	13.4918	0.852854								140305
		1832		102.089	12.1631	0.837878								27000.6
		1833		356.999	14.179	0.851657								111944
		1834		209.998	13.4541	0.842387								117153
		1835		209.998	14.1118	0.839222								27347.5
		1836		241.012	12.0716	0.804642								145585
		1837		354.086	13.0091	0.65788								113739
		1838		582.378	7.09122	0.851564								110567
		1839		304.115	12.9777	0.721425								134604
		1840		102.023	12.1598	0.839036								26912.8
		1841		636.294	2.51334	0.848061								94984.2
		1842		251.004	13.3719	0.85126								110884
		1843		315.937	13.5802	0.848898								129547
		1844		176.044	14.4239	0.666244								136531
		1845		429.192	2.84909	0.85166								132940
		1846		358.883	13.9253	0.850809								105297
		1847		304.034	11.3097	0.851896								134210
		1848		104.007	13.3972	0.852805								110889
		1849		156.969	13.9096	0.851681								123690
		1850		286.998	11.3001	0.850067								122986
		1851		709.123	14.2046	0.852126								135039
		1852		357.218	3.94219	0.804122								7301.23
		1853		339.113	4.87081	0.669657								132712
		1854		664.107	13.919	0.85139								107551
		1855		246.075	9.04619	0.841293								52525.1
		1856		246.071	11.8056	0.837801								58295.7
		1857		246.071	11.3581	0.813208								48135.4
		1858		143.978	13.9033	0.851395								108826
		1859		272.05	11.2937	0.820117								111497
		1860		272.056	13.7611	0.850806								100498
		1861		134.034	13.5739	0.850877								124342
		1862		134.034	11.2872	0.837756								49423.5
		1863		472.74	13.8844	0.85207								95884.1
		1864		286.188	12.9493	0.821849								37354
		1865		286.188	12.1174	0.77442								136802
		1866		360.047	2.65129	0.852173								68321.8
		1867		369.097	13.0091	0.731421								135740
		1868		307.074	13.495	0.849275								116705
		1869		174.013	13.7225	0.849911								309146
		1870		174.012	14.1822	0.812228								94423.5
		1871		194.082	2.5446	0.742947								118263
		1872		216.118	13.3688	0.851334								111771
		1873		688.294	13.6023	0.851661								94884.2
		1874		157.081	16.7802	0.851627								128873
		1875		320.074	5.30414	0.850622								131230
		1876		835.981	13.8844	0.849722								87865.6
		1877		218.877	13.8625	0.851505								100124
		1878		243.039	13.7713	0.850603								116698
		1879		243.039	13.3845	0.82994								120118
		1880		144.166	4.20065	0.851696								140652
		1881		151.061	9.88927	0.701145								2.30289e+06
		1882		283.105	13.5265	0.852464								103148
		1883		174.333	13.656	0.8507								87778
		1884		771.339	2.77677	0.850652								108246
		1885		272.125	12.9966	0.850305								101967
		1886		502.76	13.8593	0.849246								99913.4
		1887		605.001	13.9127	0.850667								87240.6
		1888		243.03	13.3877	0.852416								115804
		1889		89.0703	12.9997	0.849625								119035
		1890		378.25	2.74848	0.852005								106677
		1891		350.103	14.2366	0.852159								126140
		1892		201.997	13.4129	0.851618								121814
		1893		820.315	2.52583	0.852259								87834.3
		1894		222.044	13.5138	0.850385								109718
		1895		164.973	2.55712	0.853146								109131
		1896		590.813	13.9001	0.851043								93688.7
		1897		331.228	2.60106	0.851466								77381.9
		1898		236.918	13.9411	0.85087								128886
		1899		286.247	2.65757	0.851247								103127
		1900		434.794	13.919	0.851563								93783
		1901		90.0406	13.0122	0.685462								92281
		1902		581.365	3.0685	0.85253								105584
		1903		146.115	4.20378	0.848286								82837.8
		1904		293.055	5.30415	0.851564								130939
		1905		293.052	7.66888	0.834429								40251.6
		1906		293.052	8.76065	0.774389								12389.5
		1907		145.079	13.3972	0.851877								148100
		1908		335.061	8.67182	0.851745								134076
		1909		181.072	11.3581	0.836254								7.42986e+06
		1910		181.07	10.7897	0.843151								675402
		1911		295.137	2.14103	0.852672								118723
		1912		267.146	9.78831	0.796833								123876
		1913		96.7693	13.8437	0.851007								85750.9
		1914		236.877	13.8531	0.851798								108745
		1915		146.071	13.4918	0.844213								154118
		1916		249.088	7.10395	0.849768								111627
		1917		249.088	8.72121	0.847058								62091.1
		1918		439.22	13.0468	0.851698								102988
		1919		819.558	4.36618	0.847789								127953
		1920		819.558	3.07806	0.693865								78280.9
		1921		163.043	3.45057	0.627613								133477
		1922		347.967	13.8061	0.851838								108560
		1923		246.955	13.4793	0.851804								100786
		1924		151.099	2.91574	0.850344								74982.6
		1925		695.062	13.875	0.851978								94780.9
		1926		289.986	13.8311	0.851302								114320
		1927		256.972	13.897	0.851642								96227.2
		1928		483.272	4.2194	0.852328								77441.6
		1929		132.946	13.8562	0.85197								100130
		1930		334.866	13.8625	0.851525								116605
		1931		145.289	13.3845	0.851777								97446.8
		1932		339.07	13.9826	0.851606								102888
		1933		256.08	12.2317	0.839579								128265
		1934		184.013	13.4098	0.851221								80857.9
		1935		568.738	13.8844	0.851457								91475.4
		1936		280.498	2.26349	0.851922								91898.5
		1937		125.072	11.2969	0.850346								112629
		1938		244.141	14.1021	0.851684								129099
		1939		145.087	13.3845	0.599858								109604
		1940		230.913	13.9348	0.849037								117279
		1941		422.977	2.15387	0.851532								118131
		1942		186.038	13.4477	0.851318								91130.6
		1943		225.032	2.62626	0.835875								35771.8
		1944		121.043	4.20377	0.853425								115600
		1945		146.276	13.4981	0.851867								114735
		1946		483.183	12.9746	0.850552								90672.4
		1947		217.017	4.21003	0.851193								84201.7
		1948		116.017	7.64301	0.841116								21727.4
		1949		150.056	3.70879	0.557969								53957.5
		1950		369.151	11.2969	0.851822								119108
		1951		265.042	14.211	0.852881								59465.6
		1952		295.024	13.0091	0.852847								95232.4
		1953		571.289	3.07487	0.851934								102175
		1954		259.141	14.7925	0.83915								58473.2
		1955		259.141	14.3368	0.749464								127234
		1956		529.289	7.09758	0.851551								106226
		1957		403.986	13.473	0.8521								109829
		1958		157.013	13.8405	0.852245								119898
		1959		680.607	13.8499	0.851537								97515.5
		1960		192.967	7.06898	0.668417								123437
		1961		321.137	4.23192	0.851436								81036.9
		1962		277.123	4.31471	0.852833								115651
		1963		277.123	3.15498	0.800756								11283.2
		1964		272.173	13.0594	0.851638								112341
		1965		121.01	4.21628	0.852881								85494
		1966		239.177	2.57921	0.816859								122450
		1967		331.094	16.7706	0.850938								116956
		1968		149.053	13.5013	0.851668								115758
		1969		229.029	13.5707	0.85101								106636
		1970		131.13	16.7802	0.768273								130778
		1971		131.13	16.2423	0.768864								134103
		1972		114.056	7.59781	0.675656								131337
		1973		188.966	13.006	0.85191								108745
		1974		237.055	13.9667	0.850715								119531
		1975		232.102	13.4035	0.852261								112469
		1976		216.96	13.4981	0.85172								101791
		1977		227.14	8.8756	0.705896								111935
		1978		227.14	7.97445	0.608841								50890.9
		1979		357.107	4.24764	0.812629								34200
		1980		88.0556	13.0091	0.850833								168710
		1981		207.164	2.5728	0.852555								112439
		1982		244.059	14.3497	0.851509								110972
		1983		445.193	16.7674	0.850513								96099.8
		1984		89.0169	13.0091	0.852157								114412
		1985		195.024	13.8656	0.851545								99211.4
		1986		425.251	7.10395	0.849113								27664.9
		1987		251.041	16.2423	0.85101								122851
		1988		459.385	2.5446	0.849892								81176.6
		1989		279.197	2.62619	0.851777								77425.9
		1990		88.0515	13.006	0.852701								265985
		1991		219.041	7.4845	0.850709								116895
		1992		219.041	7.07534	0.847806								108366
		1993		199.072	13.5865	0.850048								110437
		1994		199.072	11.2969	0.839177								27725.6
		1995		287.1	14.0244	0.851118								110231
		1996		287.097	14.6846	0.80084								10602.5
		1997		145.042	13.3908	0.815188								149955
		1998		361.074	13.3275	0.853399								108139
		1999		268.86	13.8531	0.851242								104474
[truncated: 3,589 more rows]

## Sheet: atom difference rule table
category	name	formula	mass	direction	rdbe	note
Biotransform	O-HN	O1N-1H-1	0.984016	0	0	Deamination
Biotransform	NH3-O	N1H3O-1	1.03163	0	-1	Transamination
Biotransform	H2	H2	2.01565	0	-1	Hydrogenation
Biotransform	CH2	C1H2	14.0157	0	0	Methylation
Biotransform	NH	N1H1	15.0109	0	0	Amination
Biotransform	O	O1	15.9949	0	0	Hydroxylation
Biotransform	N1H3	N1H3	17.0265	0	-1	Amination (+NH3)
Biotransform	H2O	H2O1	18.0106	0	-1	Hydration
Biotransform	CO	C1O1	27.9949	0	1	Formylation (+CO)
Biotransform	C2H4	C2H4	28.0313	0	0	Beta oxidation
Biotransform	CH2O	C1H2O1	30.0106	0	0	Deamination
Biotransform	S1	S1	31.9721	0	0	Thiolation (S)
Biotransform	H2S	H2S1	33.9877	0	-1	Sulfurization (H2S)
Biotransform	C2H2O	C2H2O1	42.0106	0	1	Acetylation
Biotransform	CO2	C1O2	43.9898	0	1	Carboxylation (+CO2)
Biotransform	C5H8	C5H8	68.0626	1	1	Isoprenylation
Biotransform	SO3	S1O3	79.9568	0	0	Sulfurylatoin
Biotransform	HPO3	H1P1O3	79.9663	0	0	Phosphorylation
Biotransform	C6H10O5	C6H10O5	162.053	1	1	Hexose
Biotransform	C6H8O6	C6H8O6	176.032	1	2	Uronate
Biotransform	C16H30O	C16H30O1	238.23	1	1	Palmitoylation
Biotransform	C11H17NO8	C11H17N1O8	291.095	1	3	sialic acid
Biotransform	C10H12N5O6P1	C10H12N5O6P1	329.053	1	7	AMP
Biotransform	C9H13N3O10P2	C9H13N3O10P2	385.008	1	5	CDP
Biotransform	C15H21N5O13P2	C15H21N5O13P2	541.061	1	8	ADP-ribosylation
Natural_abundance	[10]B	[10]B-1B1	0.996368	-1	0
Natural_abundance	[15]N	[15]N1N-1	0.997035	1	0
Natural_abundance	[30]Si-[29]Si	[29]Si-1[30]Si1	0.997275	1	0
Natural_abundance	[29]Si	[29]Si1Si-1	0.999568	1	0
Natural_abundance	[53]Cr	[53]Cr1Cr-1	1.00014	1	0
Natural_abundance	[13]C	[13]C1C-1	1.00335	1	0
Natural_abundance	[2]H	[2]H1H-1	1.00628	1	0
Natural_abundance	[34]S	[34]S1S-1	1.9958	1	0
Natural_abundance	[30]Si	[30]Si1Si-1	1.99684	1	0
Natural_abundance	[37]Cl	[37]Cl1Cl-1	1.99705	1	0
Natural_abundance	[41]K	[41]K1K-1	1.99812	1	0
Natural_abundance	[18]O	[18]O1O-1	2.00425	1	0
Natural_abundance	[44]Ca	[44]Ca1Ca-1	3.99289	1	0
Natural_abundance	[60]Ni	[60]Ni1Ni-1	1.99544	1	0
Natural_abundance	[62]Ni	[62]Ni1Ni-1	3.993	1	0
Adduct	Na-H	H-1Na1	21.9819	1	0
Adduct	HCl	Cl1H1	35.9767	1	0
Adduct	K-H	H-1K1	37.9559	1	0
Adduct	Ni-2H	H-2Ni1	55.9197	1	0
Adduct	Ca-2H	Ca1H-2	37.9469	1	0
Adduct	HCOOH	C1H2O2	46.0055	1	0
Adduct	HCOONa	C1H1Na1O2	67.9874	1	0
Adduct	HCOOK	C1H1K1O2	83.9614	1	0
Adduct	C2H4O2	C2H4O2	60.0211	1	0
Adduct	CH3COONa	C2H3Na1O2	82.0031	1	0
Adduct	CH3COOK	C2H3K1O2	97.977	1	0
Adduct	CH2COONi	C2H2Ni1O2	115.941	1	0
Adduct	CH2COOCa	C2Ca1H2O2	97.9681	1	0
Adduct	H2SO4	H2O4S1	97.9674	1	0
Adduct	NaHSO4	H1Na1O4S1	119.949	1	0
Adduct	KHSO4	H1K1O4S1	135.923	1	0
Adduct	HNO3	H1N1O3	62.9956	1	0
Adduct	NaNO3	N1Na1O3	84.9776	1	0
Adduct	H2CO3	H2C1O3	62.0004	1	0
Adduct	NaHCO3	Na1H1C1O3	83.9823	1	0
Adduct	KHCO3	K1H1C1O3	99.9563	1	0
Adduct	H3PO4	H3O4P1	97.9769	1	0
Adduct	NaH2PO4	H2Na1O4P1	119.959	1	0
Adduct	KH2PO4	H2K1O4P1	135.933	1	0
Adduct	CrO3	Cr1O3	99.9253	1	0
Adduct	H4SiO4	H4O4Si1	95.9879	1	0
Adduct	NH3	H3N1	17.0265	1	0
Adduct	2Na-2H	H-2Na2	43.9639	1	0
Adduct	2K-2H	H-2K2	75.9118	1	0
Adduct	HCN	C1H1N1	27.0109	1	0
Adduct	CH3OH	C1H4O1	32.0262	1	0
Adduct	H3PO4 dimer	H6O8P2	195.954	1	0
Adduct	H3BO3-3H2O	B1H-3	7.98583	1	2
Adduct	H3BO3-2H2O	B1H-1O1	25.9964	1	1
Adduct	H2SiO3	H2O3Si1	77.9773	1	0
Adduct	NaOH	H1Na1O1	39.9925	1	0
Adduct	KOH	H1K1O1	55.9664	1	0
Adduct	CH3CN	C2H3N1	41.0265	1	0
Adduct	C3H8SiO3	C3H8O3Si1	120.024	1	0
Fragment	CO2	C1O2	43.9898	-1	1
Fragment	CH2O	C1H2O1	30.0106	-1	0
Fragment	H2O	H2O1	18.0106	-1	-1
Fragment	NH3	N1H3	17.0265	-1	-1
Radical	H	H	1.00782	-1	-0.5

## Sheet: HMDB metabolite information
accession	iupac_name	name	SMILES	status	formula	mass	rdbe	category
HMDB0000001	(2S)-2-amino-3-(1-methyl-1H-imidazol-4-yl)propanoic acid	1-Methylhistidine	CN1C=NC(C[C@H](N)C(O)=O)=C1	quantified	C7H11N3O2	169.085	4	Metabolite
HMDB0000002	propane-1,3-diamine	1,3-Diaminopropane	NCCCN	quantified	C3H10N2	74.0844	0	Metabolite
HMDB0000005	2-oxobutanoic acid	2-Ketobutyric acid	CCC(=O)C(O)=O	quantified	C4H6O3	102.032	2	Metabolite
HMDB0000008	2-hydroxybutanoic acid	2-Hydroxybutyric acid	CCC(O)C(O)=O	quantified	C4H8O3	104.047	1	Metabolite
HMDB0000010	(1S,10R,11S,15S)-5-hydroxy-4-methoxy-15-methyltetracyclo[8.7.0.0?7.0????????,?]heptadeca-2(7),3,5-trien-14-one	2-Methoxyestrone	[H][C@@]12CCC(=O)[C@@]1(C)CC[C@]1([H])C3=C(CC[C@@]21[H])C=C(O)C(OC)=C3	quantified	C19H24O3	300.173	8	Metabolite
HMDB0000011	(3R)-3-hydroxybutanoic acid	(R)-3-Hydroxybutyric acid	C[C@@H](O)CC(O)=O	quantified	C4H8O3	104.047	1	Metabolite
HMDB0000012	1-[(2R,4S,5R)-4-hydroxy-5-(hydroxymethyl)oxolan-2-yl]-1,2,3,4-tetrahydropyrimidine-2,4-dione	Deoxyuridine	OC[C@H]1O[C@H](C[C@@H]1O)N1C=CC(=O)NC1=O	quantified	C9H12N2O5	228.075	5	Metabolite
HMDB0000014	4-amino-1-[(2R,4S,5R)-4-hydroxy-5-(hydroxymethyl)oxolan-2-yl]-1,2-dihydropyrimidin-2-one	Deoxycytidine	NC1=NC(=O)N(C=C1)[C@H]1C[C@H](O)[C@@H](CO)O1	quantified	C9H13N3O4	227.091	5	Metabolite
HMDB0000015	(1S,2R,10R,11S,14R,15S)-14-hydroxy-14-(2-hydroxyacetyl)-2,15-dimethyltetracyclo[8.7.0.0^{2,7}.0^{11,15}]heptadec-6-en-5-one	Cortexolone	[H][C@@]12CC[C@](O)(C(=O)CO)[C@@]1(C)CC[C@@]1([H])[C@@]2([H])CCC2=CC(=O)CC[C@]12C	quantified	C21H30O4	346.214	7	Metabolite
HMDB0000016	(1S,2R,10S,11S,14S,15S)-14-(2-hydroxyacetyl)-2,15-dimethyltetracyclo[8.7.0.0^{2,7}.0^{11,15}]heptadec-6-en-5-one	Deoxycorticosterone	[H][C@@]12CC[C@H](C(=O)CO)[C@@]1(C)CC[C@@]1([H])[C@@]2([H])CCC2=CC(=O)CC[C@]12C	quantified	C21H30O3	330.219	7	Metabolite
HMDB0000017	3-hydroxy-5-(hydroxymethyl)-2-methylpyridine-4-carboxylic acid	4-Pyridoxic acid	CC1=NC=C(CO)C(C(O)=O)=C1O	quantified	C8H9N1O4	183.053	5	Metabolite
HMDB0000019	3-methyl-2-oxobutanoic acid	alpha-Ketoisovaleric acid	CC(C)C(=O)C(O)=O	quantified	C5H8O3	116.047	2	Metabolite
HMDB0000020	2-(4-hydroxyphenyl)acetic acid	p-Hydroxyphenylacetic acid	OC(=O)CC1=CC=C(O)C=C1	quantified	C8H8O3	152.047	5	Metabolite
HMDB0000021	(2S)-2-amino-3-(4-hydroxy-3-iodophenyl)propanoic acid	Iodotyrosine	N[C@@H](CC1=CC=C(O)C(I)=C1)C(O)=O	quantified	C9H10I1N1O3	306.971	5	Metabolite
HMDB0000022	4-(2-aminoethyl)-2-methoxyphenol	3-Methoxytyramine	COC1=C(O)C=CC(CCN)=C1	quantified	C9H13N1O2	167.095	4	Metabolite
HMDB0000023	(2S)-3-hydroxy-2-methylpropanoic acid	(S)-3-Hydroxyisobutyric acid	C[C@@H](CO)C(O)=O	quantified	C4H8O3	104.047	1	Metabolite
HMDB0000024	[(2R,3R,4S,5S,6R)-3,5-dihydroxy-2-{[(2S,3R,4E)-3-hydroxy-2-tetracosanamidooctadec-4-en-1-yl]oxy}-6-(hydroxymethyl)oxan-4-yl]oxidanesulfonic acid	3-O-Sulfogalactosylceramide (d18:1/24:0)	CCCCCCCCCCCCCCCCCCCCCCCC(=O)N[C@@H](CO[C@@H]1O[C@H](CO)[C@H](O)[C@H](OS(O)(=O)=O)[C@H]1O)[C@H](O)\C=C\CCCCCCCCCCCCC	quantified	C48H93N1O11S1	891.647	3	Metabolite
HMDB0000026	3-(carbamoylamino)propanoic acid	Ureidopropionic acid	NC(=O)NCCC(O)=O	quantified	C4H8N2O3	132.053	2	Metabolite
HMDB0000027	2-amino-6-(1,2-dihydroxypropyl)-1,4,5,6,7,8-hexahydropteridin-4-one	Tetrahydrobiopterin	CC(O)C(O)C1CNC2=C(N1)C(=O)N=C(N)N2	quantified	C9H15N5O3	241.117	5	Metabolite
HMDB0000030	5-[(3aS,4S,6aR)-2-oxo-hexahydro-1H-thieno[3,4-d]imidazolidin-4-yl]pentanoic acid	Biotin	[H][C@]12CS[C@@H](CCCCC(O)=O)[C@@]1([H])NC(=O)N2	quantified	C10H16N2O3S1	244.088	4	Metabolite
HMDB0000031	(1S,2S,5R,7S,10R,11S,15S)-5-hydroxy-2,15-dimethyltetracyclo[8.7.0.0^{2,7}.0^{11,15}]heptadecan-14-one	Androsterone	[H][C@@]12CCC(=O)[C@@]1(C)CC[C@@]1([H])[C@@]2([H])CC[C@@]2([H])C[C@H](O)CC[C@]12C	quantified	C19H30O2	290.225	5	Metabolite
HMDB0000032	(1S,2R,5S,11R,14R,15R)-2,15-dimethyl-14-[(2R)-6-methylheptan-2-yl]tetracyclo[8.7.0.0^{2,7}.0^{11,15}]heptadeca-7,9-dien-5-ol	7-Dehydrocholesterol	[H][C@@]1(CC[C@@]2([H])C3=CC=C4C[C@@H](O)CC[C@]4(C)[C@@]3([H])CC[C@]12C)[C@H](C)CCCC(C)C	quantified	C27H44O1	384.339	6	Metabolite
HMDB0000033	(2S)-2-(3-aminopropanamido)-3-(1H-imidazol-5-yl)propanoic acid	Carnosine	NCCC(=O)N[C@@H](CC1=CN=CN1)C(O)=O	quantified	C9H14N4O3	226.107	5	Metabolite
HMDB0000034	7H-purin-6-amine	Adenine	NC1=C2NC=NC2=NC=N1	quantified	C5H5N5	135.054	6	Metabolite
HMDB0000036	2-[(4R)-4-[(1S,2S,5R,7S,9R,10R,11S,14R,15R,16S)-5,9,16-trihydroxy-2,15-dimethyltetracyclo[8.7.0.0^{2,7}.0^{11,15}]heptadecan-14-yl]pentanamido]ethane-1-sulfonic acid	Taurocholic acid	[H][C@@]1(CC[C@@]2([H])[C@]3([H])[C@H](O)C[C@]4([H])C[C@H](O)CC[C@]4(C)[C@@]3([H])C[C@H](O)[C@]12C)[C@H](C)CCC(=O)NCCS(O)(=O)=O	quantified	C26H45N1O7S1	515.292	5	Metabolite
HMDB0000037	(2R,14S,15R,17S)-17-hydroxy-14-(2-hydroxyacetyl)-2-methyl-5-oxotetracyclo[8.7.0.0?7.0????????,?]heptadec-6-ene-15-carbaldehyde	Aldosterone	C[C@]12CCC(=O)C=C1CCC1C3CC[C@H](C(=O)CO)[C@]3(C[C@H](O)C21)C=O	quantified	C21H28O5	360.194	8	Metabolite
HMDB0000038	2-amino-6-(1,2-dihydroxypropyl)-3,4,7,8-tetrahydropteridin-4-one	Dihydrobiopterin	CC(O)C(O)C1=NC2=C(NC1)N=C(N)NC2=O	quantified	C9H13N5O3	239.102	6	Metabolite
HMDB0000039	butanoic acid	Butyric acid	CCCC(O)=O	quantified	C4H8O2	88.0524	1	Metabolite
HMDB0000042	acetic acid	Acetic acid	CC(O)=O	quantified	C2H4O2	60.0211	1	Adduct
HMDB0000043	2-(trimethylazaniumyl)acetate	Betaine	C[N+](C)(C)CC([O-])=O	quantified	C5H11N1O2	117.079	1	Metabolite
HMDB0000044	(5R)-5-[(1S)-1,2-dihydroxyethyl]-3,4-dihydroxy-2,5-dihydrofuran-2-one	Ascorbic acid	[H][C@@]1(OC(=O)C(O)=C1O)[C@@H](O)CO	quantified	C6H8O6	176.032	3	Metabolite
HMDB0000045	{[(2R,3S,4R,5R)-5-(6-amino-9H-purin-9-yl)-3,4-dihydroxyoxolan-2-yl]methoxy}phosphonic acid	Adenosine monophosphate	NC1=C2N=CN([C@@H]3O[C@H](COP(O)(O)=O)[C@@H](O)[C@H]3O)C2=NC=N1	quantified	C10H14N5O7P1	347.063	7	Metabolite
HMDB0000048	(2S,3R,4S,5R,6R)-6-({[(2S,3S,4S,5S,6R)-3,4,5-trihydroxy-6-(hydroxymethyl)oxan-2-yl]oxy}methyl)oxane-2,3,4,5-tetrol	Melibiose	OC[C@H]1O[C@H](OC[C@H]2OC(O)[C@H](O)[C@@H](O)[C@@H]2O)[C@H](O)[C@@H](O)[C@H]1O	quantified	C12H22O11	342.116	2	Metabolite
HMDB0000050	(2R,3R,4S,5R)-2-(6-amino-9H-purin-9-yl)-5-(hydroxymethyl)oxolane-3,4-diol	Adenosine	NC1=C2N=CN([C@@H]3O[C@H](CO)[C@@H](O)[C@H]3O)C2=NC=N1	quantified	C10H13N5O4	267.097	7	Metabolite
HMDB0000052	(2S)-2-{3-[(4S)-4-amino-4-carboxybutyl]carbamimidamido}butanedioic acid	Argininosuccinic acid	N[C@@H](CCCNC(=N)N[C@@H](CC(O)=O)C(O)=O)C(O)=O	quantified	C10H18N4O6	290.123	4	Metabolite
HMDB0000053	(1S,2R,10R,11S,15S)-2,15-dimethyltetracyclo[8.7.0.0?7.0????????,?]heptadec-6-ene-5,14-dione	Androstenedione	[H][C@@]12CCC(=O)[C@@]1(C)CC[C@@]1([H])[C@@]2([H])CCC2=CC(=O)CC[C@]12C	quantified	C19H26O2	286.193	7	Metabolite
HMDB0000054	3-(2-{[3-(2-carboxyethyl)-5-{[(2E)-4-ethenyl-3-methyl-5-oxo-2,5-dihydro-1H-pyrrol-2-ylidene]methyl}-4-methyl-1H-pyrrol-2-yl]methyl}-5-{[(2Z)-3-ethenyl-4-methyl-5-oxo-2,5-dihydro-1H-pyrrol-2-ylidene]methyl}-4-methyl-1H-pyrrol-3-yl)propanoic acid	Bilirubin	CC1=C(C=C)\C(NC1=O)=C\C1=C(C)C(CCC(O)=O)=C(CC2=C(CCC(O)=O)C(C)=C(N2)\C=C2/NC(=O)C(C=C)=C2C)N1	quantified	C33H36N4O6	584.263	18	Metabolite
HMDB0000055	(2R,3S,4S,5R,6S)-2-(hydroxymethyl)-6-{[(2R,3S,4R,5R,6R)-4,5,6-trihydroxy-2-(hydroxymethyl)oxan-3-yl]oxy}oxane-3,4,5-triol	Cellobiose	OC[C@H]1O[C@@H](O[C@H]2[C@H](O)[C@@H](O)[C@H](O)O[C@@H]2CO)[C@H](O)[C@@H](O)[C@@H]1O	expected	C12H22O11	342.116	2	Metabolite
HMDB0000056	3-aminopropanoic acid	beta-Alanine	NCCC(O)=O	quantified	C3H7N1O2	89.0477	1	Metabolite
HMDB0000058	(4aR,6R,7R,7aS)-6-(6-amino-9H-purin-9-yl)-2,7-dihydroxy-hexahydro-2<U+03BB>5-furo[3,2-d][1,3,2]dioxaphosphinin-2-one	Cyclic AMP	NC1=NC=NC2=C1N=CN2[C@@H]1O[C@@H]2COP(O)(=O)O[C@H]2[C@H]1O	quantified	C10H12N5O6P1	329.053	8	Metabolite
HMDB0000060	3-oxobutanoic acid	Acetoacetic acid	CC(=O)CC(O)=O	quantified	C4H6O3	102.032	2	Metabolite
HMDB0000061	{[(2R,3S,4R,5R)-5-(6-amino-9H-purin-9-yl)-4-hydroxy-3-(phosphonooxy)oxolan-2-yl]methoxy}phosphonic acid	Adenosine 3',5'-diphosphate	NC1=NC=NC2=C1N=CN2[C@@H]1O[C@H](COP(O)(O)=O)[C@@H](OP(O)(O)=O)[C@H]1O	quantified	C10H15N5O10P2	427.029	7	Metabolite
HMDB0000062	(3R)-3-hydroxy-4-(trimethylazaniumyl)butanoate	L-Carnitine	C[N+](C)(C)C[C@H](O)CC([O-])=O	quantified	C7H15N1O3	161.105	1	Metabolite
HMDB0000063	(1S,2R,10S,11S,14R,15S,17S)-14,17-dihydroxy-14-(2-hydroxyacetyl)-2,15-dimethyltetracyclo[8.7.0.0^{2,7}.0^{11,15}]heptadec-6-en-5-one	Cortisol	[H][C@@]12CC[C@](O)(C(=O)CO)[C@@]1(C)C[C@H](O)[C@@]1([H])[C@@]2([H])CCC2=CC(=O)CC[C@]12C	quantified	C21H30O5	362.209	7	Metabolite
HMDB0000064	2-(N-methylcarbamimidamido)acetic acid	Creatine	CN(CC(O)=O)C(N)=N	quantified	C4H9N3O2	131.069	2	Metabolite
HMDB0000067	(1S,2R,5S,10S,11S,14R,15R)-2,15-dimethyl-14-[(2R)-6-methylheptan-2-yl]tetracyclo[8.7.0.0^{2,7}.0^{11,15}]heptadec-7-en-5-ol	Cholesterol	[H][C@@]1(CC[C@@]2([H])[C@]3([H])CC=C4C[C@@H](O)CC[C@]4(C)[C@@]3([H])CC[C@]12C)[C@H](C)CCCC(C)C	quantified	C27H46O1	386.355	5	Metabolite
HMDB0000068	4-[(1R)-1-hydroxy-2-(methylamino)ethyl]benzene-1,2-diol	Epinephrine	CNC[C@H](O)C1=CC(O)=C(O)C=C1	quantified	C9H13N1O3	183.09	4	Metabolite
HMDB0000070	piperidine-2-carboxylic acid	Pipecolic acid	OC(=O)C1CCCCN1	quantified	C6H11N1O2	129.079	2	Metabolite
HMDB0000071	9-[(2R,4S,5R)-4-hydroxy-5-(hydroxymethyl)oxolan-2-yl]-9H-purin-6-ol	Deoxyinosine	OC[C@H]1O[C@H](C[C@@H]1O)N1C=NC2=C1N=CNC2=O	quantified	C10H12N4O4	252.086	7	Metabolite
HMDB0000072	(1Z)-prop-1-ene-1,2,3-tricarboxylic acid	cis-Aconitic acid	OC(=O)C\C(=C\C(O)=O)C(O)=O	quantified	C6H6O6	174.016	4	Metabolite
HMDB0000073	4-(2-aminoethyl)benzene-1,2-diol	Dopamine	NCCC1=CC(O)=C(O)C=C1	quantified	C8H11N1O2	153.079	4	Metabolite
HMDB0000076	1,3-diazinane-2,4-dione	Dihydrouracil	O=C1CCNC(=O)N1	quantified	C4H6N2O2	114.043	3	Metabolite
HMDB0000077	(1S,2R,5S,10R,11S,15S)-5-hydroxy-2,15-dimethyltetracyclo[8.7.0.0^{2,7}.0^{11,15}]heptadec-7-en-14-one	Dehydroepiandrosterone	[H][C@@]12CCC(=O)[C@@]1(C)CC[C@@]1([H])[C@@]2([H])CC=C2C[C@@H](O)CC[C@]12C	quantified	C19H28O2	288.209	6	Metabolite
HMDB0000078	2-[(2R)-2-amino-3-sulfanylpropanamido]acetic acid	Cysteinylglycine	N[C@@H](CS)C(=O)NCC(O)=O	quantified	C5H10N2O3S1	178.041	2	Metabolite
HMDB0000079	5-methyl-1,3-diazinane-2,4-dione	Dihydrothymine	CC1CNC(=O)NC1=O	quantified	C5H8N2O2	128.059	3	Metabolite
HMDB0000082	({[({[(2R,3S,4R,5R)-5-(4-amino-2-oxo-1,2-dihydropyrimidin-1-yl)-3,4-dihydroxyoxolan-2-yl]methoxy}(hydroxy)phosphoryl)oxy](hydroxy)phosphoryl}oxy)phosphonic acid	Cytidine triphosphate	NC1=NC(=O)N(C=C1)[C@@H]1O[C@H](COP(O)(=O)OP(O)(=O)OP(O)(O)=O)[C@@H](O)[C@H]1O	quantified	C9H16N3O14P3	482.985	5	Metabolite
HMDB0000085	2-amino-9-[(2R,4S,5R)-4-hydroxy-5-(hydroxymethyl)oxolan-2-yl]-6,9-dihydro-1H-purin-6-one	Deoxyguanosine	NC1=NC2=C(N=CN2[C@H]2C[C@H](O)[C@@H](CO)O2)C(=O)N1	quantified	C10H13N5O4	267.097	7	Metabolite
HMDB0000086	(2-{[(2S)-2,3-dihydroxypropyl phosphonato]oxy}ethyl)trimethylazanium	Glycerophosphocholine	C[N+](C)(C)CCOP([O-])(=O)OC[C@@H](O)CO	quantified	C8H20N1O6P1	257.103	0	Metabolite
HMDB0000087	dimethylamine	Dimethylamine	CNC	quantified	C2H7N1	45.0578	0	Metabolite
HMDB0000089	4-amino-1-[(2R,3S,4S,5R)-3,4-dihydroxy-5-(hydroxymethyl)oxolan-2-yl]-1,2-dihydropyrimidin-2-one	Cytidine	NC1=NC(=O)N(C=C1)[C@@H]1O[C@H](CO)[C@@H](O)[C@H]1O	quantified	C9H13N3O5	243.086	5	Metabolite
HMDB0000092	2-(dimethylamino)acetic acid	Dimethylglycine	CN(C)CC(O)=O	quantified	C4H9N1O2	103.063	1	Metabolite
HMDB0000094	2-hydroxypropane-1,2,3-tricarboxylic acid	Citric acid	OC(=O)CC(O)(CC(O)=O)C(O)=O	quantified	C6H8O7	192.027	3	Metabolite
HMDB0000095	{[(2R,3S,4R,5R)-5-(4-amino-2-oxo-1,2-dihydropyrimidin-1-yl)-3,4-dihydroxyoxolan-2-yl]methoxy}phosphonic acid	Cytidine monophosphate	NC1=NC(=O)N(C=C1)[C@@H]1O[C@H](COP(O)(O)=O)[C@@H](O)[C@H]1O	quantified	C9H14N3O8P1	323.052	5	Metabolite
HMDB0000097	(2-hydroxyethyl)trimethylazanium	Choline	C[N+](C)(C)CCO	quantified	C5H13N1O1	103.1	0	Metabolite
HMDB0000098	(3R,4S,5R)-oxane-2,3,4,5-tetrol	D-Xylose	O[C@@H]1COC(O)[C@H](O)[C@H]1O	quantified	C5H10O5	150.053	1	Metabolite
HMDB0000099	(2S)-2-amino-4-{[(2R)-2-amino-2-carboxyethyl]sulfanyl}butanoic acid	L-Cystathionine	N[C@@H](CCSC[C@H](N)C(O)=O)C(O)=O	quantified	C7H14N2O4S1	222.067	2	Metabolite
HMDB0000101	(2R,3S,5R)-5-(6-amino-9H-purin-9-yl)-2-(hydroxymethyl)oxolan-3-ol	Deoxyadenosine	NC1=NC=NC2=C1N=CN2[C@H]1C[C@H](O)[C@@H](CO)O1	quantified	C10H13N5O3	251.102	7	Metabolite
HMDB0000107	(2R,3S,4R,5S)-hexane-1,2,3,4,5,6-hexol	Galactitol	OC[C@H](O)[C@@H](O)[C@@H](O)[C@H](O)CO	quantified	C6H14O6	182.079	0	Metabolite
HMDB0000108	ethanol	Ethanol	CCO	quantified	C2H6O1	46.0419	0	Metabolite
HMDB0000112	4-aminobutanoic acid	gamma-Aminobutyric acid	NCCCC(O)=O	quantified	C4H9N1O2	103.063	1	Metabolite
HMDB0000114	[(2,3-dihydroxypropyl)(2-hydroxyethyl)amino]phosphonic acid	Glycerylphosphorylethanolamine	OCCN(CC(O)CO)P(O)(O)=O	detected	C5H14N1O6P1	215.056	0	Metabolite
HMDB0000115	2-hydroxyacetic acid	Glycolic acid	OCC(O)=O	quantified	C2H4O3	76.016	1	Metabolite
HMDB0000118	2-(4-hydroxy-3-methoxyphenyl)acetic acid	Homovanillic acid	COC1=CC(CC(O)=O)=CC=C1O	quantified	C9H10O4	182.058	5	Metabolite
HMDB0000119	2-oxoacetic acid	Glyoxylic acid	OC(=O)C=O	quantified	C2H2O3	74.0004	2	Metabolite
HMDB0000121	(2S)-2-[(4-{[(2-amino-4-oxo-1,4-dihydropteridin-6-yl)methyl]amino}phenyl)formamido]pentanedioic acid	Folic acid	NC1=NC(=O)C2=NC(CNC3=CC=C(C=C3)C(=O)N[C@@H](CCC(O)=O)C(O)=O)=CN=C2N1	quantified	C19H19N7O6	441.14	14	Metabolite
HMDB0000122	(3R,4S,5S,6R)-6-(hydroxymethyl)oxane-2,3,4,5-tetrol	D-Glucose	OC[C@H]1OC(O)[C@H](O)[C@@H](O)[C@@H]1O	quantified	C6H12O6	180.063	1	Metabolite
HMDB0000123	2-aminoacetic acid	Glycine	NCC(O)=O	quantified	C2H5N1O2	75.032	1	Metabolite
HMDB0000124	{[(2R,3R,4S)-2,3,4,6-tetrahydroxy-5-oxohexyl]oxy}phosphonic acid	Fructose 6-phosphate	OCC(=O)[C@@H](O)[C@H](O)[C@H](O)COP(O)(O)=O	quantified	C6H13O9P1	260.03	1	Metabolite
HMDB0000125	(2S)-2-amino-4-{[(1R)-1-[(carboxymethyl)carbamoyl]-2-sulfanylethyl]carbamoyl}butanoic acid	Glutathione	N[C@@H](CCC(=O)N[C@@H](CS)C(=O)NCC(O)=O)C(O)=O	quantified	C10H17N3O6S1	307.084	4	Metabolite
HMDB0000126	[(2R)-2,3-dihydroxypropoxy]phosphonic acid	Glycerol 3-phosphate	OC[C@@H](O)COP(O)(O)=O	quantified	C3H9O6P1	172.014	0	Metabolite
HMDB0000127	(2S,3S,4S,5R,6S)-3,4,5,6-tetrahydroxyoxane-2-carboxylic acid	D-Glucuronic acid	O[C@H]1O[C@@H]([C@@H](O)[C@H](O)[C@H]1O)C(O)=O	quantified	C6H10O7	194.043	2	Metabolite
HMDB0000128	2-carbamimidamidoacetic acid	Guanidoacetic acid	NC(=N)NCC(O)=O	quantified	C3H7N3O2	117.054	2	Metabolite
HMDB0000130	2-(2,5-dihydroxyphenyl)acetic acid	Homogentisic acid	OC(=O)CC1=C(O)C=CC(O)=C1	quantified	C8H8O4	168.042	5	Metabolite
HMDB0000131	propane-1,2,3-triol	Glycerol	OCC(O)CO	quantified	C3H8O3	92.0473	0	Metabolite
HMDB0000132	2-amino-6,7-dihydro-3H-purin-6-one	Guanine	NC1=NC(=O)C2=C(N1)N=CN2	quantified	C5H5N5O1	151.049	6	Metabolite
HMDB0000133	2-amino-9-[(2R,3R,4S,5R)-3,4-dihydroxy-5-(hydroxymethyl)oxolan-2-yl]-6,9-dihydro-1H-purin-6-one	Guanosine	NC1=NC2=C(N=CN2[C@@H]2O[C@H](CO)[C@@H](O)[C@H]2O)C(=O)N1	quantified	C10H13N5O5	283.092	7	Metabolite
HMDB0000134	(2E)-but-2-enedioic acid	Fumaric acid	OC(=O)\C=C\C(O)=O	quantified	C4H4O4	116.011	3	Metabolite
HMDB0000138	2-[(4R)-4-[(1S,2S,5R,9R,10R,11S,14R,15R,16S)-5,9,16-trihydroxy-2,15-dimethyltetracyclo[8.7.0.0?7.0????????,?]heptadecan-14-yl]pentanamido]acetic acid	Glycocholic acid	[H][C@@]12CC[C@H]([C@H](C)CCC(=O)NCC(O)=O)[C@@]1(C)[C@@H](O)C[C@@]1([H])[C@@]2([H])[C@H](O)CC2C[C@H](O)CC[C@]12C	quantified	C26H43N1O6	465.309	6	Metabolite
HMDB0000139	(2R)-2,3-dihydroxypropanoic acid	Glyceric acid	OC[C@@H](O)C(O)=O	quantified	C3H6O4	106.027	1	Metabolite
HMDB0000140	N-[(2S,3R,4E)-3-hydroxy-1-{[(2R,3R,4S,6R)-3,4,5-trihydroxy-6-(hydroxymethyl)oxan-2-yl]oxy}octadec-4-en-2-yl]tetracosanamide	Glucosylceramide	CCCCCCCCCCCCCCCCCCCCCCCC(=O)N[C@@H](CO[C@@H]1O[C@H](CO)C(O)[C@H](O)[C@H]1O)[C@H](O)\C=C\CCCCCCCCCCCCC	quantified	C48H93N1O8	811.69	3	Metabolite
HMDB0000142	formic acid	Formic acid	OC=O	quantified	C1H2O2	46.0055	1	Adduct
HMDB0000143	(2S,3R,4S,5R,6R)-6-(hydroxymethyl)oxane-2,3,4,5-tetrol	D-Galactose	OC[C@H]1O[C@H](O)[C@H](O)[C@@H](O)[C@H]1O	quantified	C6H12O6	180.063	1	Metabolite
HMDB0000145	(1S,10R,11S,15S)-5-hydroxy-15-methyltetracyclo[8.7.0.0?7.0????????,?]heptadeca-2(7),3,5-trien-14-one	Estrone	[H][C@@]12CCC(=O)[C@@]1(C)CC[C@]1([H])C3=C(CC[C@@]21[H])C=C(O)C=C3	quantified	C18H22O2	270.162	8	Metabolite
HMDB0000148	(2S)-2-aminopentanedioic acid	L-Glutamic acid	N[C@@H](CCC(O)=O)C(O)=O	quantified	C5H9N1O4	147.053	2	Metabolite
HMDB0000149	2-aminoethan-1-ol	Ethanolamine	NCCO	quantified	C2H7N1O1	61.0528	0	Metabolite
HMDB0000150	(3R,4S,5S,6R)-3,4,5-trihydroxy-6-(hydroxymethyl)oxan-2-one	Gluconolactone	OC[C@H]1OC(=O)[C@H](O)[C@@H](O)[C@@H]1O	quantified	C6H10O6	178.048	2	Metabolite
HMDB0000151	(1S,10R,11S,14S,15S)-15-methyltetracyclo[8.7.0.0?7.0????????,?]heptadeca-2(7),3,5-triene-5,14-diol	Estradiol	[H][C@@]12CC[C@H](O)[C@@]1(C)CC[C@]1([H])C3=C(CC[C@@]21[H])C=C(O)C=C3	quantified	C18H24O2	272.178	7	Metabolite
HMDB0000152	2,5-dihydroxybenzoic acid	Gentisic acid	OC(=O)C1=C(O)C=CC(O)=C1	quantified	C7H6O4	154.027	5	Metabolite
HMDB0000153	(1S,10R,11S,13R,14R,15S)-15-methyltetracyclo[8.7.0.0?7.0????????,?]heptadeca-2(7),3,5-triene-5,13,14-triol	Estriol	[H][C@@]12C[C@@H](O)[C@H](O)[C@@]1(C)CC[C@]1([H])C3=C(CC[C@@]21[H])C=C(O)C=C3	quantified	C18H24O3	288.173	7	Metabolite
HMDB0000156	(2S)-2-hydroxybutanedioic acid	L-Malic acid	O[C@@H](CC(O)=O)C(O)=O	quantified	C4H6O5	134.022	2	Metabolite
HMDB0000157	7H-purin-6-ol	Hypoxanthine	OC1=NC=NC2=C1NC=N2	quantified	C5H4N4O1	136.039	6	Metabolite
HMDB0000158	(2S)-2-amino-3-(4-hydroxyphenyl)propanoic acid	L-Tyrosine	N[C@@H](CC1=CC=C(O)C=C1)C(O)=O	quantified	C9H11N1O3	181.074	5	Metabolite
HMDB0000159	(2S)-2-amino-3-phenylpropanoic acid	L-Phenylalanine	N[C@@H](CC1=CC=CC=C1)C(O)=O	quantified	C9H11N1O2	165.079	5	Metabolite
HMDB0000161	(2S)-2-aminopropanoic acid	L-Alanine	C[C@H](N)C(O)=O	quantified	C3H7N1O2	89.0477	1	Metabolite
HMDB0000162	(2S)-pyrrolidine-2-carboxylic acid	L-Proline	OC(=O)[C@@H]1CCCN1	quantified	C5H9N1O2	115.063	2	Metabolite
HMDB0000163	(2R,3S,4S,5R,6R)-2-(hydroxymethyl)-6-{[(2R,3S,4R,5S,6S)-4,5,6-trihydroxy-2-(hydroxymethyl)oxan-3-yl]oxy}oxane-3,4,5-triol	D-Maltose	OC[C@H]1O[C@H](O[C@H]2[C@H](O)[C@H](O)[C@@H](O)O[C@@H]2CO)[C@H](O)[C@@H](O)[C@@H]1O	quantified	C12H22O11	342.116	2	Metabolite
HMDB0000164	methanamine	Methylamine	CN	quantified	C1H5N1	31.0422	0	Adduct
HMDB0000167	(2S,3R)-2-amino-3-hydroxybutanoic acid	L-Threonine	C[C@@H](O)[C@H](N)C(O)=O	quantified	C4H9N1O3	119.058	1	Metabolite
HMDB0000168	(2S)-2-amino-3-carbamoylpropanoic acid	L-Asparagine	N[C@@H](CC(N)=O)C(O)=O	quantified	C4H8N2O3	132.053	2	Metabolite
HMDB0000169	(3S,4S,5S,6R)-6-(hydroxymethyl)oxane-2,3,4,5-tetrol	D-Mannose	OC[C@H]1OC(O)[C@@H](O)[C@@H](O)[C@@H]1O	quantified	C6H12O6	180.063	1	Metabolite
HMDB0000172	(2S,3S)-2-amino-3-methylpentanoic acid	L-Isoleucine	CC[C@H](C)[C@H](N)C(O)=O	quantified	C6H13N1O2	131.095	1	Metabolite
HMDB0000174	(3R,4R,5R,6S)-6-methyloxane-2,3,4,5-tetrol	L-Fucose	C[C@@H]1OC(O)[C@@H](O)[C@H](O)[C@@H]1O	quantified	C6H12O5	164.068	1	Metabolite
HMDB0000175	{[(2R,3S,4R,5R)-3,4-dihydroxy-5-(6-oxo-6,9-dihydro-1H-purin-9-yl)oxolan-2-yl]methoxy}phosphonic acid	Inosinic acid	O[C@@H]1[C@@H](COP(O)(O)=O)O[C@H]([C@@H]1O)N1C=NC2=C1N=CNC2=O	quantified	C10H13N4O8P1	348.047	7	Metabolite
HMDB0000176	(2E)-but-2-enedioic acid	Maleic acid	OC(=O)\C=C/C(O)=O	quantified	C4H4O4	116.011	3	Metabolite
HMDB0000177	(2S)-2-amino-3-(1H-imidazol-5-yl)propanoic acid	L-Histidine	N[C@@H](CC1=CN=CN1)C(O)=O	quantified	C6H9N3O2	155.069	4	Metabolite
HMDB0000181	(2S)-2-amino-3-(3,4-dihydroxyphenyl)propanoic acid	L-Dopa	N[C@@H](CC1=CC(O)=C(O)C=C1)C(O)=O	quantified	C9H11N1O4	197.069	5	Metabolite
HMDB0000182	(2S)-2,6-diaminohexanoic acid	L-Lysine	NCCCC[C@H](N)C(O)=O	quantified	C6H14N2O2	146.106	1	Metabolite
HMDB0000186	(2R,3R,4S,5R,6S)-2-(hydroxymethyl)-6-{[(2R,3S,4R,5R,6S)-4,5,6-trihydroxy-2-(hydroxymethyl)oxan-3-yl]oxy}oxane-3,4,5-triol	Alpha-Lactose	OC[C@H]1O[C@@H](O[C@H]2[C@H](O)[C@@H](O)[C@@H](O)O[C@@H]2CO)[C@H](O)[C@@H](O)[C@H]1O	quantified	C12H22O11	342.116	2	Metabolite
HMDB0000187	(2S)-2-amino-3-hydroxypropanoic acid	L-Serine	N[C@@H](CO)C(O)=O	quantified	C3H7N1O3	105.043	1	Metabolite
HMDB0000189	({[({[(2R,3S,4R,5R)-3,4-dihydroxy-5-(6-hydroxy-9H-purin-9-yl)oxolan-2-yl]methoxy}(hydroxy)phosphoryl)oxy](hydroxy)phosphoryl}oxy)phosphonic acid	Inosine triphosphate	O[C@@H]1[C@@H](COP(O)(=O)OP(O)(=O)OP(O)(O)=O)O[C@H]([C@@H]1O)N1C=NC2=C1N=CN=C2O	expected	C10H15N4O14P3	507.98	7	Metabolite
HMDB0000190	(2R)-2-hydroxypropanoic acid	L-Lactic acid	C[C@H](O)C(O)=O	quantified	C3H6O3	90.0317	1	Metabolite
HMDB0000191	(2S)-2-aminobutanedioic acid	L-Aspartic acid	N[C@@H](CC(O)=O)C(O)=O	quantified	C4H7N1O4	133.038	2	Metabolite
HMDB0000192	(2R)-2-amino-3-{[(2R)-2-amino-2-carboxyethyl]disulfanyl}propanoic acid	L-Cystine	N[C@@H](CSSC[C@H](N)C(O)=O)C(O)=O	quantified	C6H12N2O4S2	240.024	2	Metabolite
HMDB0000193	1-hydroxypropane-1,2,3-tricarboxylic acid	Isocitric acid	OC(C(CC(O)=O)C(O)=O)C(O)=O	quantified	C6H8O7	192.027	3	Metabolite
HMDB0000194	(2S)-2-(3-aminopropanamido)-3-(1-methyl-1H-imidazol-5-yl)propanoic acid	Anserine	CN1C=NC=C1C[C@H](NC(=O)CCN)C(O)=O	quantified	C10H16N4O3	240.122	5	Metabolite
HMDB0000195	9-[(2R,3R,4S,5R)-3,4-dihydroxy-5-(hydroxymethyl)oxolan-2-yl]-6,9-dihydro-3H-purin-6-one	Inosine	OC[C@H]1O[C@H]([C@H](O)[C@@H]1O)N1C=NC2=C1NC=NC2=O	quantified	C10H12N4O5	268.081	7	Metabolite
HMDB0000197	2-(1H-indol-3-yl)acetic acid	Indoleacetic acid	OC(=O)CC1=CNC2=C1C=CC=C2	quantified	C10H9N1O2	175.063	7	Metabolite
HMDB0000201	(3R)-3-(acetyloxy)-4-(trimethylazaniumyl)butanoate	L-Acetylcarnitine	CC(=O)O[C@H](CC([O-])=O)C[N+](C)(C)C	quantified	C9H17N1O4	203.116	2	Metabolite
HMDB0000202	2-methylpropanedioic acid	Methylmalonic acid	CC(C(O)=O)C(O)=O	quantified	C4H6O4	118.027	2	Metabolite
HMDB0000205	2-oxo-3-phenylpropanoic acid	Phenylpyruvic acid	OC(=O)C(=O)CC1=CC=CC=C1	quantified	C9H8O3	164.047	6	Metabolite
HMDB0000206	(2S)-2-amino-6-acetamidohexanoic acid	N6-Acetyl-L-lysine	CC(=O)NCCCC[C@H](N)C(O)=O	quantified	C8H16N2O3	188.116	2	Metabolite
HMDB0000207	(9Z)-octadec-9-enoic acid	Oleic acid	CCCCCCCC\C=C/CCCCCCCC(O)=O	quantified	C18H34O2	282.256	2	Metabolite
HMDB0000208	2-oxopentanedioic acid	Oxoglutaric acid	OC(=O)CCC(=O)C(O)=O	quantified	C5H6O5	146.022	3	Metabolite
HMDB0000209	2-phenylacetic acid	Phenylacetic acid	OC(=O)CC1=CC=CC=C1	quantified	C8H8O2	136.052	5	Metabolite
HMDB0000210	3-[(2R)-2,4-dihydroxy-3,3-dimethylbutanamido]propanoic acid	Pantothenic acid	CC(C)(CO)[C@@H](O)C(=O)NCCC(O)=O	quantified	C9H17N1O5	219.111	2	Metabolite
HMDB0000211	(1R,2R,3r,4S,5S,6s)-cyclohexane-1,2,3,4,5,6-hexol	myo-Inositol	O[C@H]1[C@H](O)[C@@H](O)[C@H](O)[C@H](O)[C@@H]1O	quantified	C6H12O6	180.063	1	Metabolite
HMDB0000212	N-[(2S,3R,4R,5R,6R)-2,4,5-trihydroxy-6-(hydroxymethyl)oxan-3-yl]acetamide	N-Acetylgalactosamine	CC(=O)N[C@H]1[C@@H](O)O[C@H](CO)[C@H](O)[C@@H]1O	detected	C8H15N1O6	221.09	2	Metabolite
HMDB0000213	{[(1R,2S,3R,4R,5S,6S)-2,3,4,5,6-pentahydroxycyclohexyl]oxy}phosphonic acid	Myo-inositol 1-phosphate	O[C@H]1[C@H](O)[C@H](O)[C@H](OP(O)(O)=O)[C@@H](O)[C@@H]1O	detected	C6H13O9P1	260.03	1	Metabolite
HMDB0000214	(2S)-2,5-diaminopentanoic acid	Ornithine	NCCC[C@H](N)C(O)=O	quantified	C5H12N2O2	132.09	1	Metabolite
HMDB0000215	N-[(3R,4R,5S,6R)-2,4,5-trihydroxy-6-(hydroxymethyl)oxan-3-yl]acetamide	N-Acetyl-D-glucosamine	CC(=O)N[C@H]1C(O)O[C@H](CO)[C@@H](O)[C@@H]1O	quantified	C8H15N1O6	221.09	2	Metabolite
HMDB0000216	4-[(1R)-2-amino-1-hydroxyethyl]benzene-1,2-diol	Norepinephrine	NC[C@H](O)C1=CC(O)=C(O)C=C1	quantified	C8H11N1O3	169.074	4	Metabolite
HMDB0000217	1-[(2R,3R,4S,5R)-5-[({[({[(2R,3R,4R,5R)-5-(6-amino-9H-purin-9-yl)-3-hydroxy-4-(phosphonooxy)oxolan-2-yl]methoxy}(hydroxy)phosphoryl)oxy](hydroxy)phosphoryl}oxy)methyl]-3,4-dihydroxyoxolan-2-yl]-3-carbamoyl-1<U+03BB>5-pyridin-1-ylium	NADP	NC(=O)C1=C[N+](=CC=C1)[C@@H]1O[C@H](CO[P@](O)(=O)O[P@](O)(=O)OC[C@H]2O[C@H]([C@H](OP(O)(O)=O)[C@@H]2O)N2C=NC3=C(N)N=CN=C23)[C@@H](O)[C@H]1O	quantified	C21H28N7O17P3	743.075	13	Metabolite
HMDB0000218	3-[(2R,3R,4S,5R)-3,4-dihydroxy-5-[(phosphonooxy)methyl]oxolan-2-yl]-2,6-dioxo-1,2,3,6-tetrahydropyrimidine-4-carboxylic acid	Orotidylic acid	O[C@H]1[C@@H](O)[C@@H](O[C@@H]1COP(O)(O)=O)N1C(=O)NC(=O)C=C1C(O)=O	quantified	C10H13N2O11P1	368.026	6	Metabolite
HMDB0000220	hexadecanoic acid	Palmitic acid	CCCCCCCCCCCCCCCC(O)=O	quantified	C16H32O2	256.24	1	Metabolite
HMDB0000221	{[(2S,3S,4S,5S)-2-(6-amino-9H-purin-9-yl)-5-[({[({[(2S,3R,4S,5S)-5-(3-carbamoyl-1,4-dihydropyridin-1-yl)-3,4-dihydroxyoxolan-2-yl]methoxy}(hydroxy)phosphoryl)oxy](hydroxy)phosphoryl}oxy)methyl]-4-hydroxyoxolan-3-yl]oxy}phosphonic acid	NADPH	NC(=O)C1=CN(C=CC1)[C@H]1O[C@@H](COP(O)(=O)OP(O)(=O)OC[C@@H]2O[C@@H]([C@@H](OP(O)(O)=O)[C@H]2O)N2C=NC3=C(N)N=CN=C23)[C@H](O)[C@@H]1O	quantified	C21H30N7O17P3	745.091	12	Metabolite
HMDB0000222	(3R)-3-(hexadecanoyloxy)-4-(trimethylazaniumyl)butanoate	L-Palmitoylcarnitine	CCCCCCCCCCCCCCCC(=O)O[C@H](CC([O-])=O)C[N+](C)(C)C	quantified	C23H45N1O4	399.335	2	Metabolite
HMDB0000223	2-oxobutanedioic acid	Oxalacetic acid	OC(=O)CC(=O)C(O)=O	quantified	C4H4O5	132.006	3	Metabolite
HMDB0000224	(2-aminoethoxy)phosphonic acid	O-Phosphoethanolamine	NCCOP(O)(O)=O	quantified	C2H8N1O4P1	141.019	0	Metabolite
HMDB0000225	2-oxohexanedioic acid	Oxoadipic acid	OC(=O)CCCC(=O)C(O)=O	quantified	C6H8O5	160.037	3	Metabolite
HMDB0000226	2,6-dioxo-1,2,3,6-tetrahydropyrimidine-4-carboxylic acid	Orotic acid	OC(=O)C1=CC(=O)NC(=O)N1	quantified	C5H4N2O4	156.017	5	Metabolite
HMDB0000227	3,5-dihydroxy-3-methylpentanoic acid	Mevalonic acid	CC(O)(CCO)CC(O)=O	quantified	C6H12O4	148.074	1	Metabolite
HMDB0000228	phenol	Phenol	OC1=CC=CC=C1	quantified	C6H6O1	94.0419	4	Metabolite
HMDB0000229	3-carbamoyl-1-[(2R,3R,4S,5R)-5-[(hydrogen phosphonatooxy)methyl]-3,4-dihydroxyoxolan-2-yl]-1<U+03BB>5-pyridin-1-ylium	Nicotinamide ribotide	NC(=O)C1=CC=C[N+](=C1)[C@@H]1O[C@H](COP(O)([O-])=O)[C@@H](O)[C@H]1O	quantified	C11H15N2O8P1	334.057	6	Metabolite
HMDB0000230	(2S,4S,5R,6R)-5-acetamido-2,4-dihydroxy-6-[(1R,2R)-1,2,3-trihydroxypropyl]oxane-2-carboxylic acid	N-Acetylneuraminic acid	CC(=O)N[C@@H]1[C@@H](O)C[C@](O)(O[C@H]1[C@H](O)[C@H](O)CO)C(O)=O	quantified	C11H19N1O9	309.106	3	Metabolite
HMDB0000232	pyridine-2,3-dicarboxylic acid	Quinolinic acid	OC(=O)C1=CC=CN=C1C(O)=O	quantified	C7H5N1O4	167.022	6	Metabolite
HMDB0000234	(1S,2R,10R,11S,14R,15S)-14-hydroxy-2,15-dimethyltetracyclo[8.7.0.0?7.0????????,?]heptadec-6-en-5-one	Testosterone	[H][C@@]12CC[C@H](O)[C@@]1(C)CC[C@@]1([H])[C@@]2([H])CCC2=CC(=O)CC[C@]12C	quantified	C19H28O2	288.209	6	Metabolite
HMDB0000235	3-[(4-amino-2-methylpyrimidin-5-yl)methyl]-5-(2-hydroxyethyl)-4-methyl-1,3-thiazol-3-ium	Thiamine	CC1=C(CCO)SC=[N+]1CC1=CN=C(C)N=C1N	quantified	C12H16N4O1S1	264.104	7	Metabolite
HMDB0000237	propanoic acid	Propionic acid	CCC(O)=O	quantified	C3H6O2	74.0368	1	Metabolite
HMDB0000238	2-amino-6-[(2S)-2-hydroxypropanoyl]-1,4,7,8-tetrahydropteridin-4-one	Sepiapterin	C[C@H](O)C(=O)C1=NC2=C(NC1)NC(N)=NC2=O	quantified	C9H11N5O3	237.086	7	Metabolite
HMDB0000239	4,5-bis(hydroxymethyl)-2-methylpyridin-3-ol	Pyridoxine	CC1=C(O)C(CO)=C(CO)C=N1	quantified	C8H11N1O3	169.074	4	Metabolite
HMDB0000240	sulfurous acid	Sulfite	OS(O)=O	quantified	H2O3S1	81.9725	0	Adduct
HMDB0000241	3-[20-(2-carboxyethyl)-9,14-diethenyl-5,10,15,19-tetramethyl-21,22,23,24-tetraazapentacyclo[16.2.1.1?6.18,????????.1????????,?]tetracosa-1(21),2,4,6,8(23),9,11,13,15,17,19-undecaen-4-yl]propanoic acid	Protoporphyrin IX	CC1=C(CCC(O)=O)/C2=C/C3=N/C(=C\C4=C(C)C(C=C)=C(N4)/C=C4\N=C(\C=C\1/N\2)C(C=C)=C4C)/C(C)=C3CCC(O)=O	quantified	C34H34N4O4	562.258	20	Metabolite
HMDB0000243	2-oxopropanoic acid	Pyruvic acid	CC(=O)C(O)=O	quantified	C3H4O3	88.016	2	Metabolite
HMDB0000244	7,8-dimethyl-10-[(2S,3S,4R)-2,3,4,5-tetrahydroxypentyl]-2H,3H,4H,10H-benzo[g]pteridine-2,4-dione	Riboflavin	CC1=C(C)C=C2N(C[C@H](O)[C@H](O)[C@H](O)CO)C3=NC(=O)NC(=O)C3=NC2=C1	quantified	C17H20N4O6	376.138	10	Metabolite
HMDB0000245	3-[5-(aminomethyl)-4-(carboxymethyl)-1H-pyrrol-3-yl]propanoic acid	Porphobilinogen	NCC1=C(CC(O)=O)C(CCC(O)=O)=CN1	quantified	C10H14N2O4	226.095	5	Metabolite
HMDB0000246	oxolane	Tetrahydrofuran	C1CCOC1	quantified	C4H8O1	72.0575	1	Metabolite
HMDB0000247	(2R,3R,4R,5S)-hexane-1,2,3,4,5,6-hexol	Sorbitol	OC[C@H](O)[C@@H](O)[C@H](O)[C@H](O)CO	quantified	C6H14O6	182.079	0	Metabolite
HMDB0000248	(2S)-2-amino-3-[4-(4-hydroxy-3,5-diiodophenoxy)-3,5-diiodophenyl]propanoic acid	Thyroxine	N[C@@H](CC1=CC(I)=C(OC2=CC(I)=C(O)C(I)=C2)C(I)=C1)C(O)=O	quantified	C15H11I4N1O4	776.687	9	Metabolite
HMDB0000250	(phosphonooxy)phosphonic acid	Pyrophosphate	OP(O)(=O)OP(O)(O)=O	quantified	H4O7P2	177.943	0	Adduct
HMDB0000251	2-aminoethane-1-sulfonic acid	Taurine	NCCS(O)(=O)=O	quantified	C2H7N1O3S1	125.015	0	Metabolite
HMDB0000252	(4E)-2-aminooctadec-4-ene-1,3-diol	Sphingosine	CCCCCCCCCCCCC\C=C\C(O)C(N)CO	quantified	C18H37N1O2	299.282	1	Metabolite
HMDB0000253	1-[(1S,2R,5S,10S,11S,14S,15S)-5-hydroxy-2,15-dimethyltetracyclo[8.7.0.0^{2,7}.0^{11,15}]heptadec-7-en-14-yl]ethan-1-one	Pregnenolone	[H][C@@]12CC[C@H](C(C)=O)[C@@]1(C)CC[C@@]1([H])[C@@]2([H])CC=C2C[C@@H](O)CC[C@]12C	quantified	C21H32O2	316.24	6	Metabolite
HMDB0000254	butanedioic acid	Succinic acid	OC(=O)CCC(O)=O	quantified	C4H6O4	118.027	2	Metabolite
HMDB0000256	(6Z,10E,14E,18E)-2,6,10,15,19,23-hexamethyltetracosa-2,6,10,14,18,22-hexaene	Squalene	CC(C)=CCC\C(C)=C/CC\C(C)=C\CC\C=C(/C)CC\C=C(/C)CCC=C(C)C	quantified	C30H50	410.391	6	Metabolite
HMDB0000257	sulfanesulfonic acid	Thiosulfate	OS(S)(=O)=O	quantified	H2O3S2	113.945	0	Adduct
HMDB0000258	(2R,3R,4S,5S,6R)-2-{[(2S,3S,4S,5R)-3,4-dihydroxy-2,5-bis(hydroxymethyl)oxolan-2-yl]oxy}-6-(hydroxymethyl)oxane-3,4,5-triol	Sucrose	OC[C@H]1O[C@@](CO)(O[C@H]2O[C@H](CO)[C@@H](O)[C@H](O)[C@H]2O)[C@@H](O)[C@@H]1O	quantified	C12H22O11	342.116	2	Metabolite
HMDB0000259	3-(2-aminoethyl)-1H-indol-5-ol	Serotonin	NCCC1=CNC2=CC=C(O)C=C12	quantified	C10H12N2O1	176.095	6	Metabolite
HMDB0000262	5-methyl-1,2,3,4-tetrahydropyrimidine-2,4-dione	Thymine	CC1=CNC(=O)NC1=O	quantified	C5H6N2O2	126.043	4	Metabolite
HMDB0000263	2-(phosphonooxy)prop-2-enoic acid	Phosphoenolpyruvic acid	OC(=O)C(=C)OP(O)(O)=O	quantified	C3H5O6P1	167.982	2	Metabolite
HMDB0000265	(2S)-2-amino-3-[4-(4-hydroxy-3-iodophenoxy)-3,5-diiodophenyl]propanoic acid	Liothyronine	N[C@@H](CC1=CC(I)=C(OC2=CC(I)=C(O)C=C2)C(I)=C1)C(O)=O	quantified	C15H12I3N1O4	650.79	9	Metabolite
HMDB0000267	(2S)-5-oxopyrrolidine-2-carboxylic acid	Pyroglutamic acid	OC(=O)[C@@H]1CCC(=O)N1	quantified	C5H7N1O3	129.043	3	Metabolite
HMDB0000268	1-[(1S,2S,5R,7R,11S,14S,15S,17S)-5,17-dihydroxy-2,15-dimethyltetracyclo[8.7.0.0?7.0????????,?]heptadecan-14-yl]-2-hydroxyethan-1-one	Tetrahydrocorticosterone	[H][C@@]12CC[C@H](C(=O)CO)[C@@]1(C)C[C@H](O)[C@@]1([H])C2CC[C@]2([H])C[C@H](O)CC[C@]12C	quantified	C21H34O4	350.246	5	Metabolite
HMDB0000269	(2S,3R)-2-aminooctadecane-1,3-diol	Sphinganine	CCCCCCCCCCCCCCC[C@@H](O)[C@@H](N)CO	quantified	C18H39N1O2	301.298	0	Metabolite
HMDB0000271	2-(methylamino)acetic acid	Sarcosine	CNCC(O)=O	quantified	C3H7N1O2	89.0477	1	Metabolite
HMDB0000272	(2S)-2-amino-3-(phosphonooxy)propanoic acid	Phosphoserine	N[C@@H](COP(O)(O)=O)C(O)=O	quantified	C3H8N1O6P1	185.009	1	Metabolite
HMDB0000273	1-[(2R,4S,5R)-4-hydroxy-5-(hydroxymethyl)oxolan-2-yl]-5-methyl-1,2,3,4-tetrahydropyrimidine-2,4-dione	Thymidine	CC1=CN([C@H]2C[C@H](O)[C@@H](CO)O2)C(=O)NC1=O	quantified	C10H14N2O5	242.09	5	Metabolite
HMDB0000277	{[(2S,3R,4E)-2-amino-3-hydroxyoctadec-4-en-1-yl]oxy}phosphonic acid	Sphingosine 1-phosphate	CCCCCCCCCCCCC\C=C\[C@@H](O)[C@@H](N)COP(O)(O)=O	quantified	C18H38N1O5P1	379.249	1	Metabolite
HMDB0000279	(2S)-2-{[(5S)-5-amino-5-carboxypentyl]amino}pentanedioic acid	Saccharopine	N[C@@H](CCCCN[C@@H](CCC(O)=O)C(O)=O)C(O)=O	detected	C11H20N2O6	276.132	3	Metabolite
HMDB0000280	[({[(2R,3R,4S,5R)-3,4-dihydroxy-5-[(phosphonooxy)methyl]oxolan-2-yl]oxy}(hydroxy)phosphoryl)oxy]phosphonic acid	Phosphoribosyl pyrophosphate	O[C@H]1[C@@H](O)[C@@H](O[P@](O)(=O)OP(O)(O)=O)O[C@@H]1COP(O)(O)=O	quantified	C5H13O14P3	389.952	1	Metabolite
HMDB0000283	(3R,4S,5R)-5-(hydroxymethyl)oxolane-2,3,4-triol	D-Ribose	OC[C@H]1OC(O)[C@H](O)[C@@H]1O	quantified	C5H10O5	150.053	1	Metabolite
HMDB0000285	({[({[(2R,3S,4R,5R)-5-(2,4-dioxo-1,2,3,4-tetrahydropyrimidin-1-yl)-3,4-dihydroxyoxolan-2-yl]methoxy}(hydroxy)phosphoryl)oxy](hydroxy)phosphoryl}oxy)phosphonic acid	Uridine triphosphate	O[C@H]1[C@@H](O)[C@@H](O[C@@H]1COP(O)(=O)OP(O)(=O)OP(O)(O)=O)N1C=CC(=O)NC1=O	quantified	C9H15N2O15P3	483.969	5	Metabolite
HMDB0000286	[({[(2S,3R,4S,5S)-5-(2,4-dioxo-1,2,3,4-tetrahydropyrimidin-1-yl)-3,4-dihydroxyoxolan-2-yl]methoxy}(hydroxy)phosphoryl)oxy]({[(3S,4R,5R,6S)-3,4,5-trihydroxy-6-(hydroxymethyl)oxan-2-yl]oxy})phosphinic acid	Uridine diphosphate glucose	OC[C@@H]1OC(OP(O)(=O)OP(O)(=O)OC[C@@H]2O[C@@H]([C@@H](O)[C@H]2O)N2C=CC(=O)NC2=O)[C@@H](O)[C@H](O)[C@H]1O	quantified	C15H24N2O17P2	566.055	6	Metabolite
HMDB0000288	{[(2R,3S,4R,5R)-5-(2,4-dioxo-1,2,3,4-tetrahydropyrimidin-1-yl)-3,4-dihydroxyoxolan-2-yl]methoxy}phosphonic acid	Uridine 5'-monophosphate	O[C@H]1[C@@H](O)[C@@H](O[C@@H]1COP(O)(O)=O)N1C=CC(=O)NC1=O	quantified	C9H13N2O9P1	324.036	5	Metabolite
HMDB0000289	2,3,6,7,8,9-hexahydro-1H-purine-2,6,8-trione	Uric acid	O=C1NC2=C(N1)C(=O)NC(=O)N2	quantified	C5H4N4O3	168.028	6	Metabolite
HMDB0000290	[({[(2R,3S,4R,5R)-5-(2,4-dioxo-1,2,3,4-tetrahydropyrimidin-1-yl)-3,4-dihydroxyoxolan-2-yl]methoxy}(hydroxy)phosphoryl)oxy]({[(2R,3R,4R,5S,6R)-3-acetamido-4,5-dihydroxy-6-(hydroxymethyl)oxan-2-yl]oxy})phosphinic acid	Uridine diphosphate-N-acetylglucosamine	CC(=O)N[C@@H]1[C@@H](O)[C@H](O)[C@@H](CO)O[C@@H]1OP(O)(=O)OP(O)(=O)OC[C@H]1O[C@H]([C@H](O)[C@@H]1O)N1C=CC(=O)NC1=O	quantified	C17H27N3O17P2	607.082	7	Metabolite
HMDB0000291	(2S)-2-hydroxy-2-(4-hydroxy-3-methoxyphenyl)acetic acid	Vanillylmandelic acid	COC1=C(O)C=CC(=C1)[C@H](O)C(O)=O	quantified	C9H10O5	198.053	5	Metabolite
HMDB0000292	2,3,6,7-tetrahydro-1H-purine-2,6-dione	Xanthine	O=C1NC2=C(NC=N2)C(=O)N1	quantified	C5H4N4O2	152.033	6	Metabolite
HMDB0000293	({[({[(2R,3S,4R,5R)-5-(2,6-dihydroxy-9H-purin-9-yl)-3,4-dihydroxyoxolan-2-yl]methoxy}(hydroxy)phosphoryl)oxy](hydroxy)phosphoryl}oxy)phosphonic acid	Xanthosine 5-triphosphate	O[C@@H]1[C@@H](COP(O)(=O)OP(O)(=O)OP(O)(O)=O)O[C@H]([C@@H]1O)N1C=NC2=C1N=C(O)N=C2O	expected	C10H15N4O15P3	523.975	7	Metabolite
HMDB0000294	urea	Urea	NC(N)=O	quantified	C1H4N2O1	60.0324	1	Adduct
HMDB0000295	[({[(2R,3S,4R,5R)-5-(2,4-dioxo-1,2,3,4-tetrahydropyrimidin-1-yl)-3,4-dihydroxyoxolan-2-yl]methoxy}(hydroxy)phosphoryl)oxy]phosphonic acid	Uridine 5'-diphosphate	O[C@H]1[C@@H](O)[C@@H](O[C@@H]1COP(O)(=O)OP(O)(O)=O)N1C=CC(=O)NC1=O	quantified	C9H14N2O12P2	404.002	5	Metabolite
HMDB0000296	1-[(2R,3R,4S,5R)-3,4-dihydroxy-5-(hydroxymethyl)oxolan-2-yl]-1,2,3,4-tetrahydropyrimidine-2,4-dione	Uridine	OC[C@H]1O[C@H]([C@H](O)[C@@H]1O)N1C=CC(=O)NC1=O	quantified	C9H12N2O6	244.07	5	Metabolite
HMDB0000299	9-[(2R,3R,4S,5R)-3,4-dihydroxy-5-(hydroxymethyl)oxolan-2-yl]-9H-purine-2,6-diol	Xanthosine	OC[C@H]1O[C@H]([C@H](O)[C@@H]1O)N1C=NC2=C1N=C(O)N=C2O	quantified	C10H12N4O6	284.076	7	Metabolite
HMDB0000300	1,2,3,4-tetrahydropyrimidine-2,4-dione	Uracil	O=C1NC=CC(=O)N1	quantified	C4H4N2O2	112.027	4	Metabolite
HMDB0000301	(2E)-3-(1H-imidazol-4-yl)prop-2-enoic acid	Urocanic acid	OC(=O)\C=C\C1=CNC=N1	quantified	C6H6N2O2	138.043	5	Metabolite
HMDB0000302	[({[(2R,3S,4R,5R)-5-(2,4-dioxo-1,2,3,4-tetrahydropyrimidin-1-yl)-3,4-dihydroxyoxolan-2-yl]methoxy}(hydroxy)phosphoryl)oxy]({[(2R,3R,4S,5R,6R)-3,4,5-trihydroxy-6-(hydroxymethyl)oxan-2-yl]oxy})phosphinic acid	Uridine diphosphategalactose	OC[C@H]1O[C@H](O[P@@](O)(=O)O[P@@](O)(=O)OC[C@H]2O[C@H]([C@H](O)[C@@H]2O)N2C=CC(=O)NC2=O)[C@H](O)[C@@H](O)[C@H]1O	quantified	C15H24N2O17P2	566.055	6	Metabolite
HMDB0000303	2-(1H-indol-3-yl)ethan-1-amine	Tryptamine	NCCC1=CNC2=CC=CC=C12	quantified	C10H12N2	160.1	6	Metabolite
HMDB0000304	[({[5-(2,4-dioxo-1,2,3,4-tetrahydropyrimidin-1-yl)-3,4-dihydroxyoxolan-2-yl]methoxy}(hydroxy)phosphoryl)oxy]({[3-acetamido-4,5-dihydroxy-6-(hydroxymethyl)oxan-2-yl]oxy})phosphinic acid	Uridine diphosphate-N-acetylgalactosamine	CC(=O)NC1C(O)C(O)C(CO)OC1OP(O)(=O)OP(O)(=O)OCC1OC(C(O)C1O)N1C=CC(=O)NC1=O	expected	C17H27N3O17P2	607.082	7	Metabolite
HMDB0000305	(2Z,4E,6E,8E)-3,7-dimethyl-9-(2,6,6-trimethylcyclohex-1-en-1-yl)nona-2,4,6,8-tetraen-1-ol	Vitamin A	C\C(=C/CO)\C=C\C=C(/C)\C=C\C1=C(C)CCCC1(C)C	quantified	C20H30O1	286.23	6	Metabolite
HMDB0000306	4-(2-aminoethyl)phenol	Tyramine	NCCC1=CC=C(O)C=C1	quantified	C8H11N1O1	137.084	4	Metabolite
HMDB0000307	(4R)-4-[(1S,2S,3R,5S,7S,9R,10S,11S,14R,15R,16S)-3,5,9,16-tetrahydroxy-2,15-dimethyltetracyclo[8.7.0.0?7.0????????,?]heptadecan-14-yl]pentanoic acid	1b-Hydroxycholic acid	[H][C@@]12CC[C@H]([C@H](C)CCC(O)=O)[C@@]1(C)[C@@H](O)C[C@@]1([H])[C@@]2([H])[C@H](O)C[C@]2([H])C[C@H](O)C[C@@H](O)[C@]12C	expected	C24H40O6	424.282	5	Metabolite
HMDB0000308	(4R)-4-[(1S,2R,5S,10S,11S,14R,15R)-5-hydroxy-2,15-dimethyltetracyclo[8.7.0.0?7.0????????,?]heptadec-7-en-14-yl]pentanoic acid	3b-Hydroxy-5-cholenoic acid	[H][C@@]12CC[C@H]([C@H](C)CCC(O)=O)[C@@]1(C)CC[C@@]1([H])[C@@]2([H])CC=C2C[C@@H](O)CC[C@]12C	quantified	C24H38O3	374.282	6	Metabolite
HMDB0000309	(1S,2S,10S,11S,13S,15R)-5,13-dihydroxy-2,15-dimethyltetracyclo[8.7.0.0?7.0????????,?]heptadec-4-en-3-one	3a,16b-Dihydroxyandrostenone	[H][C@@]12C[C@H](O)C[C@@]1(C)CC[C@@]1([H])[C@@]2([H])CCC2CC(O)=CC(=O)[C@]12C	expected	C19H28O3	304.204	6	Metabolite
HMDB0000310	methyl 3-oxobutanoate	Methylacetoacetic acid	COC(=O)CC(C)=O	expected	C5H8O3	116.047	2	Metabolite
HMDB0000311	(4R)-4-[(1S,2R,5S,6R,7S,9R,10R,11S,14R,15R,16S)-5,6,9,16-tetrahydroxy-2,15-dimethyltetracyclo[8.7.0.0?7.0????????,?]heptadecan-14-yl]pentanoic acid	3b,4b,7a,12a-Tetrahydroxy-5b-cholanoic acid	[H][C@@]12CC[C@H]([C@H](C)CCC(O)=O)[C@@]1(C)[C@@H](O)C[C@@]1([H])[C@@]2([H])[C@H](O)C[C@]2([H])[C@@H](O)[C@@H](O)CC[C@]12C	expected	C24H40O6	424.282	5	Metabolite
HMDB0000312	(4R)-4-[(1S,2S,5R,7S,9R,10R,11S,14R,15R,16R)-5,9,16-trihydroxy-2,15-dimethyltetracyclo[8.7.0.0?7.0????????,?]heptadecan-14-yl]pentanoic acid	3a,7a,12b-Trihydroxy-5b-cholanoic acid	[H][C@@]12CC[C@H]([C@H](C)CCC(O)=O)[C@@]1(C)[C@H](O)C[C@@]1([H])[C@@]2([H])[C@H](O)C[C@]2([H])C[C@H](O)CC[C@]12C	expected	C24H40O5	408.288	5	Metabolite
HMDB0000313	(1S,10R,11S,13S,15S)-5,13-dihydroxy-15-methyltetracyclo[8.7.0.0?7.0????????,?]heptadeca-2(7),3,5-trien-14-one	16b-Hydroxyestrone	[H][C@@]12C[C@H](O)C(=O)[C@@]1(C)CC[C@]1([H])C3=C(CC[C@@]21[H])C=C(O)C=C3	expected	C18H22O3	286.157	8	Metabolite
HMDB0000314	2-hydroxy-1-[(1S,2S,5S,7S,10S,11S,14R,15S,17S)-5,14,17-trihydroxy-2,15-dimethyltetracyclo[8.7.0.0?7.0????????,?]heptadecan-14-yl]ethan-1-one	3b-Allotetrahydrocortisol	[H][C@@]12CC[C@](O)(C(=O)CO)[C@@]1(C)C[C@H](O)[C@@]1([H])[C@@]2([H])CC[C@@]2([H])C[C@@H](O)CC[C@]12C	expected	C21H34O5	366.241	5	Metabolite
HMDB0000315	1-[(1S,2R,5S,10S,11S,13R,14R,15S)-5,13-dihydroxy-2,15-dimethyltetracyclo[8.7.0.0?7.0????????,?]heptadec-7-en-14-yl]ethan-1-one	16-a-Hydroxypregnenolone	[H][C@@]12C[C@@H](O)[C@H](C(C)=O)[C@@]1(C)CC[C@@]1([H])[C@@]2([H])CC=C2C[C@@H](O)CC[C@]12C	quantified	C21H32O3	332.235	6	Metabolite
HMDB0000316	(4S)-4-[(2S,4S,5S,7R,9R,15R,16S)-4,5,9,16-tetrahydroxy-2,15-dimethyltetracyclo[8.7.0.0?7.0????????,?]heptadecan-14-yl]pentanoic acid	2b,3a,7a,12a-Tetrahydroxy-5b-cholanoic acid	[H][C@@]12C[C@H](O)[C@@H](O)C[C@]1(C)C1C[C@H](O)[C@]3(C)C(CCC3C1[C@H](O)C2)[C@@H](C)CCC(O)=O	expected	C24H40O6	424.282	5	Metabolite
HMDB0000317	(2R,3R)-2-hydroxy-3-methylpentanoic acid	2-Hydroxy-3-methylpentanoic acid	CC[C@@H](C)[C@@H](O)C(O)=O	quantified	C6H12O3	132.079	1	Metabolite
HMDB0000318	4-(1,2-dihydroxyethyl)benzene-1,2-diol	3,4-Dihydroxyphenylglycol	OCC(O)C1=CC(O)=C(O)C=C1	quantified	C8H10O4	170.058	4	Metabolite
HMDB0000319	(1S,2R,10S,11S,14S,15R,17S)-17-hydroxy-14-(2-hydroxyacetyl)-15-(hydroxymethyl)-2-methyltetracyclo[8.7.0.0^{2,7}.0^{11,15}]heptadec-6-en-5-one	18-Hydroxycorticosterone	[H][C@@]12CC[C@H](C(=O)CO)[C@@]1(CO)C[C@H](O)[C@@]1([H])[C@@]2([H])CCC2=CC(=O)CC[C@]12C	quantified	C21H30O5	362.209	7	Metabolite
HMDB0000320	(4S)-4-[(1S,2R,5R,6R,7S,9R,10S,11S,15R)-5,6,9-trihydroxy-2,15-dimethyltetracyclo[8.7.0.0?7.0????????,?]heptadecan-14-yl]pentanoic acid	3a,4b,7a-Trihydroxy-5b-cholanoic acid	[H][C@@]12CCC([C@@H](C)CCC(O)=O)[C@@]1(C)CC[C@@]1([H])[C@@]2([H])[C@H](O)C[C@]2([H])[C@@H](O)[C@H](O)CC[C@]12C	expected	C24H40O5	408.288	5	Metabolite
HMDB0000321	2-hydroxyhexanedioic acid	2-Hydroxyadipic acid	OC(CCCC(O)=O)C(O)=O	quantified	C6H10O5	162.053	2	Metabolite
HMDB0000322	(2R,5S,14R,15S)-5,14-dihydroxy-2,15-dimethyltetracyclo[8.7.0.0?7.0????????,?]heptadec-7-en-13-one	16-Oxoandrostenediol	C[C@]12CCC3C(CC=C4C[C@@H](O)CC[C@]34C)C1CC(=O)[C@@H]2O	expected	C19H28O3	304.204	6	Metabolite
HMDB0000323	3-aminopiperidin-2-one	3-Amino-2-piperidone	NC1CCCNC1=O	detected	C5H10N2O1	114.079	2	Metabolite
HMDB0000324	(1S,2S,10S,11S,13R,15R)-5,13-dihydroxy-2,15-dimethyltetracyclo[8.7.0.0?7.0????????,?]heptadec-4-en-3-one	3a,16a-Dihydroxyandrostenone	[H][C@@]12C[C@@H](O)C[C@@]1(C)CC[C@@]1([H])[C@@]2([H])CCC2CC(O)=CC(=O)[C@]12C	expected	C19H28O3	304.204	6	Metabolite
HMDB0000325	3-hydroxyoctanedioic acid	3-Hydroxysuberic acid	OC(CCCCC(O)=O)CC(O)=O	quantified	C8H14O5	190.084	2	Metabolite
HMDB0000326	(4R)-4-[(2S,3R,5S,15R,16S)-3,5,16-trihydroxy-2,15-dimethyltetracyclo[8.7.0.0?7.0????????,?]heptadecan-14-yl]pentanoic acid	1b,3a,12a-Trihydroxy-5b-cholanoic acid	C[C@H](CCC(O)=O)C1CCC2C3CCC4C[C@H](O)C[C@@H](O)[C@]4(C)C3C[C@H](O)[C@]12C	quantified	C24H40O5	408.288	5	Metabolite
HMDB0000328	(4R)-4-[(1S,2S,5R,7R,10R,11S,14R,15R)-5-hydroxy-2,15-dimethyl-16-oxotetracyclo[8.7.0.0?7.0????????,?]heptadecan-14-yl]pentanoic acid	12-Ketodeoxycholic acid	[H][C@@]1(CC[C@@]2([H])[C@]3([H])CC[C@]4([H])C[C@H](O)CC[C@]4(C)[C@@]3([H])CC(=O)[C@]12C)[C@H](C)CCC(O)=O	expected	C24H38O4	390.277	6	Metabolite
HMDB0000329	2-phenylbutanoic acid	2-Phenylbutyric acid	CCC(C(O)=O)C1=CC=CC=C1	expected	C10H12O2	164.084	5	Metabolite
HMDB0000330	(4S)-4-[(2R,5R,6R,15R,16S)-5,6,16-trihydroxy-2,15-dimethyltetracyclo[8.7.0.0?7.0????????,?]heptadecan-14-yl]pentanoic acid	3a,4b,12a-Trihydroxy-5b-cholanoic acid	C[C@@H](CCC(O)=O)C1CCC2C3CCC4[C@@H](O)[C@H](O)CC[C@]4(C)C3C[C@H](O)[C@]12C	expected	C24H40O5	408.288	5	Metabolite
HMDB0000331	2-[(4R)-4-[(1S,2S,5R,7S,9S,10R,11S,14R,15R,16S)-5,9,16-trihydroxy-2,15-dimethyltetracyclo[8.7.0.0?7.0????????,?]heptadecan-14-yl]pentanamido]acetic acid	3a,7b,12a-Trihydroxyoxocholanyl-Glycine	[H][C@@]1(CC[C@@]2([H])[C@]3([H])[C@@H](O)C[C@]4([H])C[C@H](O)CC[C@]4(C)[C@@]3([H])C[C@H](O)[C@]12C)[C@H](C)CCC(=O)NCC(O)=O	expected	C26H43N1O6	465.309	6	Metabolite
HMDB0000332	(1S,2R,10S,11S,14S,15R,17S)-14,17-dihydroxy-14-(2-hydroxyacetyl)-2-methyl-5-oxotetracyclo[8.7.0.0?7.0????????,?]heptadec-6-ene-15-carbaldehyde	18-Oxocortisol	[H][C@@]12CC[C@@](O)(C(=O)CO)[C@]1(C[C@H](O)[C@@]1([H])[C@@]2([H])CCC2=CC(=O)CC[C@]12C)C=O	quantified	C21H28O6	376.189	8	Metabolite
HMDB0000333	2-(3-hydroxy-4-methoxyphenyl)acetic acid	Isohomovanillic acid	COC1=CC=C(CC(O)=O)C=C1O	detected	C9H10O4	182.058	5	Metabolite
HMDB0000335	(1S,10R,11S,13R,15S)-5,13-dihydroxy-15-methyltetracyclo[8.7.0.0?7.0????????,?]heptadeca-2(7),3,5-trien-14-one	16a-Hydroxyestrone	[H][C@@]12C[C@@H](O)C(=O)[C@@]1(C)CC[C@]1([H])C3=C(CC[C@@]21[H])C=C(O)C=C3	quantified	C18H22O3	286.157	8	Metabolite
HMDB0000336	(2R)-3-hydroxy-2-methylpropanoic acid	(R)-3-Hydroxyisobutyric acid	C[C@H](CO)C(O)=O	quantified	C4H8O3	104.047	1	Metabolite
HMDB0000337	3,4-dihydroxybutanoic acid	(S)-3,4-Dihydroxybutyric acid	OCC(O)CC(O)=O	quantified	C4H8O4	120.042	1	Metabolite
HMDB0000338	(1S,10R,11S,14S,15S)-15-methyltetracyclo[8.7.0.0?7.0????????,?]heptadeca-2(7),3,5-triene-4,5,14-triol	2-Hydroxyestradiol	[H][C@@]12CC[C@H](O)[C@@]1(C)CC[C@]1([H])C3=C(CC[C@@]21[H])C=C(O)C(O)=C3	quantified	C18H24O3	288.173	7	Metabolite
HMDB0000339	2-(2-methylbutanamido)acetic acid	2-Methylbutyrylglycine	CCC(C)C(=O)NCC(O)=O	quantified	C7H13N1O3	159.09	2	Metabolite
HMDB0000340	(4R)-4-[(1S,2R,5R,7S,9R,10R,11S,14R,15R,16S)-5,9,16-trihydroxy-2-(hydroxymethyl)-15-methyltetracyclo[8.7.0.0?7.0????????,?]heptadecan-14-yl]pentanoic acid	3a,7a,12a,19-Tetrahydroxy-5b-cholanoic acid	[H][C@@]12CC[C@H]([C@H](C)CCC(O)=O)[C@@]1(C)[C@@H](O)C[C@@]1([H])[C@@]2([H])[C@H](O)C[C@]2([H])C[C@H](O)CC[C@]12CO	expected	C24H40O6	424.282	5	Metabolite
HMDB0000341	(2E)-oct-2-enedioic acid	2-Octenedioic acid	OC(=O)CCCC\C=C\C(O)=O	quantified	C8H12O4	172.074	3	Metabolite
HMDB0000343	(1S,10R,11S,15S)-4,5-dihydroxy-15-methyltetracyclo[8.7.0.0?7.0????????,?]heptadeca-2(7),3,5-trien-14-one	2-Hydroxyestrone	[H][C@@]12CCC(=O)[C@@]1(C)CC[C@]1([H])C3=C(CC[C@@]21[H])C=C(O)C(O)=C3	quantified	C18H22O3	286.157	8	Metabolite
HMDB0000344	(1S,10R,11S,14S,15S)-4,5-dimethoxy-15-methyltetracyclo[8.7.0.0?7.0????????,?]heptadeca-2(7),3,5-trien-14-ol	2-Methoxyestradiol-3-methylether	[H][C@@]12CC[C@H](O)[C@@]1(C)CC[C@]1([H])C3=C(CC[C@@]21[H])C=C(OC)C(OC)=C3	expected	C20H28O3	316.204	7	Metabolite
HMDB0000345	3-hydroxyhexanedioic acid	3-Hydroxyadipic acid	OC(CCC(O)=O)CC(O)=O	quantified	C6H10O5	162.053	2	Metabolite
HMDB0000346	(2S,4S,5R)-2,4,5,6-tetrahydroxyhexanoic acid	3-Deoxyarabinohexonic acid	OC[C@@H](O)[C@@H](O)C[C@H](O)C(O)=O	expected	C6H12O6	180.063	1	Metabolite
HMDB0000347	(1S,10R,11S,13S,14R,15S)-15-methyltetracyclo[8.7.0.0?7.0????????,?]heptadeca-2(7),3,5-triene-5,13,14-triol	16b-Hydroxyestradiol	[H][C@@]12C[C@H](O)[C@H](O)[C@@]1(C)CC[C@]1([H])C3=C(CC[C@@]21[H])C=C(O)C=C3	detected	C18H24O3	288.173	7	Metabolite
HMDB0000348	(4R)-4-[(1S,2S,5S,7S,10R,11S,14R,15R,16S)-5,16-dihydroxy-2,15-dimethyltetracyclo[8.7.0.0?7.0????????,?]heptadecan-14-yl]pentanoic acid	3b,12a-Dihydroxy-5a-cholanoic acid	[H][C@@]12CC[C@H]([C@H](C)CCC(O)=O)[C@@]1(C)[C@@H](O)C[C@@]1([H])[C@@]2([H])CC[C@@]2([H])C[C@@H](O)CC[C@]12C	expected	C24H40O4	392.293	5	Metabolite
HMDB0000349	(3R,4R)-3,4-dihydroxyoxolan-2-one	Erythrono-1,4-lactone	O[C@@H]1COC(=O)[C@@H]1O	expected	C4H6O4	118.027	2	Metabolite
HMDB0000350	3-hydroxydecanedioic acid	3-Hydroxysebacic acid	OC(CCCCCCC(O)=O)CC(O)=O	quantified	C10H18O5	218.115	2	Metabolite
HMDB0000351	(2S,3R)-3-hydroxy-2-methylbutanoic acid	3-Hydroxy-2-methyl-[R-(R,S)]-butanoic acid	C[C@@H](O)[C@H](C)C(O)=O	expected	C5H10O3	118.063	1	Metabolite
HMDB0000352	(1S,2R,5S,10R,11S,13R,15S)-5,13-dihydroxy-2,15-dimethyltetracyclo[8.7.0.0?7.0????????,?]heptadec-7-en-14-one	16a-Hydroxydehydroisoandrosterone	[H][C@@]12C[C@@H](O)C(=O)[C@@]1(C)CC[C@@]1([H])[C@@]2([H])CC=C2C[C@@H](O)CC[C@]12C	quantified	C19H28O3	304.204	6	Metabolite
HMDB0000353	(1S,2S,10R,11S,12R,14R,15S)-14-ethyl-5,12,14-trihydroxy-2,15-dimethyltetracyclo[8.7.0.0?7.0????????,?]heptadec-4-en-3-one	3b,15b,17a-Trihydroxy-pregnenone	[H][C@@]12[C@H](O)C[C@](O)(CC)[C@@]1(C)CC[C@@]1([H])[C@@]2([H])CCC2CC(O)=CC(=O)[C@]12C	expected	C21H32O4	348.23	6	Metabolite
HMDB0000354	3-hydroxy-2-methylbutanoic acid	2-Methyl-3-hydroxybutyric acid	CC(O)C(C)C(O)=O	quantified	C5H10O3	118.063	1	Metabolite
HMDB0000355	3-hydroxy-3-methylpentanedioic acid	3-Hydroxymethylglutaric acid	CC(O)(CC(O)=O)CC(O)=O	quantified	C6H10O5	162.053	2	Metabolite
HMDB0000356	(13R,14S,15S)-15-methyltetracyclo[8.7.0.0?7.0????????,?]heptadeca-2(7),3,5-triene-5,13,14-triol	17-Epiestriol	C[C@]12CCC3C(CCC4=C3C=CC(O)=C4)C1C[C@@H](O)[C@H]2O	expected	C18H24O3	288.173	7	Metabolite
HMDB0000357	3-hydroxybutanoic acid	3-Hydroxybutyric acid	CC(O)CC(O)=O	quantified	C4H8O3	104.047	1	Metabolite
HMDB0000359	(6R)-6-[(1S,2S,5R,7S,9R,10R,11S,14R,15R)-5,9-dihydroxy-2,15-dimethyltetracyclo[8.7.0.0^{2,7}.0^{11,15}]heptadecan-14-yl]-2-methylheptanoic acid	3alpha,7alpha-Dihydroxycoprostanic acid	[H][C@@]1(CC[C@@]2([H])[C@]3([H])[C@H](O)C[C@]4([H])C[C@H](O)CC[C@]4(C)[C@@]3([H])CC[C@]12C)[C@H](C)CCCC(C)C(O)=O	quantified	C27H46O4	434.34	5	Metabolite
HMDB0000360	2,4-dihydroxybutanoic acid	2,4-Dihydroxybutanoic acid	OCCC(O)C(O)=O	quantified	C4H8O4	120.042	1	Metabolite
HMDB0000361	(4R)-4-[(1S,2S,5S,7S,9R,10R,11S,14R,15R)-5,9-dihydroxy-2,15-dimethyltetracyclo[8.7.0.0?7.0????????,?]heptadecan-14-yl]pentanoic acid	3b,7a-Dihydroxy-5b-cholanoic acid	[H][C@@]12CC[C@H]([C@H](C)CCC(O)=O)[C@@]1(C)CC[C@@]1([H])[C@@]2([H])[C@H](O)C[C@]2([H])C[C@@H](O)CC[C@]12C	expected	C24H40O4	392.293	5	Metabolite
HMDB0000362	3-hydroxy-2-(phosphonooxy)propanoic acid	2-Phosphoglyceric acid	OCC(OP(O)(O)=O)C(O)=O	quantified	C3H7O7P1	185.993	1	Metabolite
HMDB0000363	1-[(1S,2R,5S,10R,11S,14R,15S)-5,14-dihydroxy-2,15-dimethyltetracyclo[8.7.0.0?7.0????????,?]heptadec-7-en-14-yl]ethan-1-one	17a-Hydroxypregnenolone	[H][C@@]12CC[C@](O)(C(C)=O)[C@@]1(C)CC[C@@]1([H])[C@@]2([H])CC=C2C[C@@H](O)CC[C@]12C	quantified	C21H32O3	332.235	6	Metabolite
HMDB0000364	(4R)-4-[(1S,2R,5R,7R,8R,9R,10S,11S,14R,15R)-5,8,9-trihydroxy-2,15-dimethyltetracyclo[8.7.0.0?7.0????????,?]heptadecan-14-yl]pentanoic acid	3a,6a,7b-Trihydroxy-5b-cholanoic acid	[H][C@@]12CC[C@H]([C@H](C)CCC(O)=O)[C@@]1(C)CC[C@@]1([H])[C@@]2([H])[C@@H](O)[C@H](O)[C@]2([H])C[C@H](O)CC[C@]12C	expected	C24H40O5	408.288	5	Metabolite
HMDB0000365	(1S,2S,5S,10R,11S,15S)-5-hydroxy-2,15-dimethyltetracyclo[8.7.0.0^{2,7}.0^{11,15}]heptadecan-14-one	Epiandrosterone	[H][C@@]12CCC(=O)[C@@]1(C)CC[C@@]1([H])[C@@]2([H])CCC2C[C@@H](O)CC[C@]12C	quantified	C19H30O2	290.225	5	Metabolite
HMDB0000366	(3S,4R)-3,4,5-trihydroxypentanoic acid	2-Deoxyribonic acid	OC[C@@H](O)[C@@H](O)CC(O)=O	expected	C5H10O5	150.053	1	Metabolite
HMDB0000367	(4R)-4-[(1S,2R,5R,7R,8S,9R,10R,11S,14R,15R,16S)-5,8,9,16-tetrahydroxy-2,15-dimethyltetracyclo[8.7.0.0?7.0????????,?]heptadecan-14-yl]pentanoic acid	3a,6b,7b,12a-Tetrahydroxy-5b-cholanoic acid	[H][C@@]12CC[C@H]([C@H](C)CCC(O)=O)[C@@]1(C)[C@@H](O)C[C@@]1([H])[C@@]2([H])[C@@H](O)[C@@H](O)[C@]2([H])C[C@H](O)CC[C@]12C	expected	C24H40O6	424.282	5	Metabolite
HMDB0000368	(2R)-2-hydroxyhexanedioic acid	2(R)-Hydroxyadipic acid	O[C@H](CCCC(O)=O)C(O)=O	expected	C6H10O5	162.053	2	Metabolite
HMDB0000369	(2S,5S,14S,15S)-2,15-dimethyltetracyclo[8.7.0.0?7.0????????,?]heptadecane-5,14-diol	3b,17b-Dihydroxyetiocholane	C[C@]12CCC3C(CCC4C[C@@H](O)CC[C@]34C)C1CC[C@@H]2O	quantified	C19H32O2	292.24	4	Metabolite
HMDB0000370	2-amino-3-phosphonopropanoic acid	2-Amino-3-phosphonopropionic acid	NC(CP(O)(O)=O)C(O)=O	expected	C3H8N1O5P1	169.014	1	Metabolite
HMDB0000371	(4R)-4-[(1S,2S,10S,11S,14R,15R)-3,5,16-trihydroxy-2,15-dimethyltetracyclo[8.7.0.0?7.0????????,?]heptadecan-14-yl]pentanoic acid	1,3,12-Trihydroxycholan-24-oic acid	[H][C@@]12CC[C@H]([C@H](C)CCC(O)=O)[C@@]1(C)C(O)C[C@@]1([H])[C@@]2([H])CCC2CC(O)CC(O)[C@]12C	expected	C24H40O5	408.288	5	Metabolite
HMDB0000372	(15S)-5-hydroxy-15-methyltetracyclo[8.7.0.0?7.0????????,?]heptadeca-2(7),3,5-triene-13,14-dione	16-Oxoestrone	C[C@]12CCC3C(CCC4=C3C=CC(O)=C4)C1CC(=O)C2=O	expected	C18H20O3	284.141	9	Metabolite
HMDB0000374	(1S,2R,10R,11S,14R,15S)-14-acetyl-14-hydroxy-2,15-dimethyltetracyclo[8.7.0.0?7.0????????,?]heptadec-6-en-5-one	17-Hydroxyprogesterone	[H][C@@]12CC[C@](O)(C(C)=O)[C@@]1(C)CC[C@@]1([H])[C@@]2([H])CCC2=CC(=O)CC[C@]12C	quantified	C21H30O3	330.219	7	Metabolite
HMDB0000375	3-(3-hydroxyphenyl)propanoic acid	3-(3-Hydroxyphenyl)propanoic acid	OC(=O)CCC1=CC=CC(O)=C1	quantified	C9H10O3	166.063	5	Metabolite
HMDB0000376	(4R)-4-[(1S,2S,5S,7R,9R,10R,11S,14R,15R,16S)-5,9,16-trihydroxy-2,15-dimethyltetracyclo[8.7.0.0?7.0????????,?]heptadecan-14-yl]pentanoic acid	3b,7a,12a-Trihydroxy-5a-Cholanoic acid	[H][C@@]12CC[C@H]([C@H](C)CCC(O)=O)[C@@]1(C)[C@@H](O)C[C@@]1([H])[C@@]2([H])[C@H](O)C[C@@]2([H])C[C@@H](O)CC[C@]12C	expected	C24H40O5	408.288	5	Metabolite
HMDB0000377	(4R)-4-[(1S,2R,5R,7R,8S,9R,10R,11S,14R,15R,16R)-5,8,9,16-tetrahydroxy-2,15-dimethyltetracyclo[8.7.0.0?7.0????????,?]heptadecan-14-yl]pentanoic acid	3a,6b,7b,12b-Tetrahydroxy-5b-cholanoic acid	[H][C@@]12CC[C@H]([C@H](C)CCC(O)=O)[C@@]1(C)[C@H](O)C[C@@]1([H])[C@@]2([H])[C@@H](O)[C@@H](O)[C@]2([H])C[C@H](O)CC[C@]12C	expected	C24H40O6	424.282	5	Metabolite
HMDB0000378	3-[(2-methylbutanoyl)oxy]-4-(trimethylazaniumyl)butanoate	2-Methylbutyroylcarnitine	CCC(C)C(=O)OC(CC([O-])=O)C[N+](C)(C)C	detected	C12H23N1O4	245.163	2	Metabolite
HMDB0000379	2-hydroxy-1-methylpropane-1,2,3-tricarboxylic acid	2-Methylcitric acid	CC(C(O)=O)C(O)(CC(O)=O)C(O)=O	quantified	C7H10O7	206.043	3	Metabolite
HMDB0000380	(1S,10R,11S,14S,15S)-5-methoxy-15-methyltetracyclo[8.7.0.0?7.0????????,?]heptadeca-2(7),3,5-triene-4,14-diol	2-Hydroxyestradiol-3-methyl ether	[H][C@@]12CC[C@H](O)[C@@]1(C)CC[C@]1([H])C3=C(CC[C@@]21[H])C=C(OC)C(O)=C3	quantified	C19H26O3	302.188	7	Metabolite
HMDB0000381	(4S)-4-[(2S,5R,15R)-5-hydroxy-2,15-dimethyltetracyclo[8.7.0.0?7.0????????,?]heptadecan-14-yl]pentanoic acid	Allolithocholic acid	C[C@@H](CCC(O)=O)C1CCC2C3CCC4C[C@H](O)CC[C@]4(C)C3CC[C@]12C	detected	C24H40O3	376.298	5	Metabolite
HMDB0000383	(2S,5R,14R,15S)-2,15-dimethyltetracyclo[8.7.0.0?7.0????????,?]heptadecane-5,14-diol	3a,17a-Dihydroxy-5b-androstane	C[C@]12CCC3C(CCC4C[C@H](O)CC[C@]34C)C1CC[C@H]2O	expected	C19H32O2	292.24	4	Metabolite
HMDB0000384	(4R)-4-[(1S,2S,5R,9R,10R,11S,14R,15R)-5,9-dihydroxy-2,15-dimethyltetracyclo[8.7.0.0?7.0????????,?]heptadecan-14-yl]pentanoic acid	3a,7a-Dihydroxycholanoic acid	[H][C@@]12CC[C@H]([C@H](C)CCC(O)=O)[C@@]1(C)CC[C@@]1([H])[C@@]2([H])[C@H](O)CC2C[C@H](O)CC[C@]12C	expected	C24H40O4	392.293	5	Metabolite
HMDB0000385	(4R)-4-[(2R,15R,16S)-16-hydroxy-2,15-dimethyl-5-oxotetracyclo[8.7.0.0?7.0????????,?]heptadeca-6,8-dien-14-yl]pentanoic acid	12a-Hydroxy-3-oxocholadienic acid	C[C@H](CCC(O)=O)C1CCC2C3C=CC4=CC(=O)CC[C@]4(C)C3C[C@H](O)[C@]12C	expected	C24H34O4	386.246	8	Metabolite
HMDB0000386	[(1S,2S,10S,11S,13R,15R)-5-hydroxy-2,15-dimethyl-3-oxotetracyclo[8.7.0.0?7.0????????,?]heptadec-4-en-13-yl]oxidanesulfonic acid	3b,16a-Dihydroxyandrostenone sulfate	[H][C@@]12C[C@H](C[C@@]1(C)CC[C@@]1([H])[C@@]2([H])CCC2CC(O)=CC(=O)[C@]12C)OS(O)(=O)=O	expected	C19H28O6S1	384.161	6	Metabolite
HMDB0000387	3-hydroxydodecanoic acid	3-Hydroxydodecanoic acid	CCCCCCCCCC(O)CC(O)=O	quantified	C12H24O3	216.173	1	Metabolite
HMDB0000388	(1S,2S,10S,11S,15R)-5,13-dihydroxy-2,15-dimethyltetracyclo[8.7.0.0?7.0????????,?]heptadec-4-en-3-one	3a,16-Dihydroxyandrostenone	[H][C@@]12CC(O)C[C@@]1(C)CC[C@@]1([H])[C@@]2([H])CCC2CC(O)=CC(=O)[C@]12C	expected	C19H28O3	304.204	6	Metabolite
HMDB0000389	2-amino-6-propanoyl-1,4,7,8-tetrahydropteridin-4-one	2'-Deoxysepiapterin	CCC(=O)C1=NC2=C(NC1)NC(N)=NC2=O	expected	C9H11N5O2	221.091	7	Metabolite
HMDB0000390	(4R)-4-[(1S,2S,5R,7S,9S,10R,11S,14R,15R,16R)-5,9,16-trihydroxy-2,15-dimethyltetracyclo[8.7.0.0?7.0????????,?]heptadecan-14-yl]pentanoic acid	3a,7b,12b-Trihydroxy-5b-cholanoic acid	[H][C@@]12CC[C@H]([C@H](C)CCC(O)=O)[C@@]1(C)[C@H](O)C[C@@]1([H])[C@@]2([H])[C@@H](O)C[C@]2([H])C[C@H](O)CC[C@]12C	expected	C24H40O5	408.288	5	Metabolite
HMDB0000391	(4R)-4-[(1S,2S,5R,7S,10R,11S,14R,15R,16S)-5,16-dihydroxy-2,15-dimethyl-9-oxotetracyclo[8.7.0.0?7.0????????,?]heptadecan-14-yl]pentanoic acid	7-Ketodeoxycholic acid	[H][C@@]12CC[C@H]([C@H](C)CCC(O)=O)[C@@]1(C)[C@@H](O)C[C@@]1([H])[C@@]2([H])C(=O)C[C@]2([H])C[C@H](O)CC[C@]12C	detected	C24H38O5	406.272	6	Metabolite
HMDB0000392	(2Z)-oct-2-enoic acid	2-Octenoic acid	CCCCC\C=C/C(O)=O	expected	C8H14O2	142.099	2	Metabolite
HMDB0000393	(3E)-hex-3-enedioic acid	3-Hexenedioic acid	OC(=O)C\C=C\CC(O)=O	expected	C6H8O4	144.042	3	Metabolite
HMDB0000394	3-hydroxytetradecanedioic acid	3-Hydroxytetradecanedioic acid	OC(CCCCCCCCCCC(O)=O)CC(O)=O	detected	C14H26O5	274.178	2	Metabolite
HMDB0000395	(4R)-4-[(1S,2S,5S,7S,9S,10R,11S,14R,15R,16S)-5,9,16-trihydroxy-2,15-dimethyltetracyclo[8.7.0.0?7.0????????,?]heptadecan-14-yl]pentanoic acid	3b,7b,12a-Trihydroxy-5b-cholanoic acid	[H][C@@]12CC[C@H]([C@H](C)CCC(O)=O)[C@@]1(C)[C@@H](O)C[C@@]1([H])[C@@]2([H])[C@@H](O)C[C@]2([H])C[C@@H](O)CC[C@]12C	expected	C24H40O5	408.288	5	Metabolite
HMDB0000396	2-(hydroxymethyl)butanoic acid	2-Ethylhydracrylic acid	CCC(CO)C(O)=O	quantified	C5H10O3	118.063	1	Metabolite
HMDB0000397	2,3-dihydroxybenzoic acid	2-Pyrocatechuic acid	OC(=O)C1=C(O)C(O)=CC=C1	quantified	C7H6O4	154.027	5	Metabolite
HMDB0000398	3-oxohexanedioic acid	3-Oxoadipic acid	OC(=O)CCC(=O)CC(O)=O	expected	C6H8O5	160.037	3	Metabolite
HMDB0000399	(4R)-4-[(1S,2R,5R,7R,8S,9S,10R,11S,14R,15R,16S)-5,8,9,16-tetrahydroxy-2,15-dimethyltetracyclo[8.7.0.0?7.0????????,?]heptadecan-14-yl]pentanoic acid	3a,6b,7a,12a-Tetrahydroxy-5b-cholanoic acid	[H][C@@]12CC[C@H]([C@H](C)CCC(O)=O)[C@@]1(C)[C@@H](O)C[C@@]1([H])[C@@]2([H])[C@H](O)[C@@H](O)[C@]2([H])C[C@H](O)CC[C@]12C	expected	C24H40O6	424.282	5	Metabolite
HMDB0000400	(4R)-4-[(1S,2S,5R,7S,9R,10R,11S,14R,15R)-5,9-dihydroxy-2,15-dimethyl-16-oxotetracyclo[8.7.0.0?7.0????????,?]heptadecan-14-yl]pentanoic acid	3,7-Dihydroxy-12-oxocholanoic acid	[H][C@@]12CC[C@H]([C@H](C)CCC(O)=O)[C@@]1(C)C(=O)C[C@@]1([H])[C@@]2([H])[C@H](O)C[C@]2([H])C[C@H](O)CC[C@]12C	detected	C24H38O5	406.272	6	Metabolite
HMDB0000401	6-amino-7H-purine-2,8-diol	2,8-Dihydroxyadenine	NC1=NC(O)=NC2=C1NC(O)=N2	expected	C5H5N5O2	167.044	6	Metabolite
HMDB0000402	(2S)-2-hydroxy-2-(propan-2-yl)butanedioic acid	2-Isopropylmalic acid	CC(C)[C@@](O)(CC(O)=O)C(O)=O	quantified	C7H12O5	176.068	2	Metabolite
HMDB0000403	6-amino-7H-purin-2-ol	2-Hydroxyadenine	NC1=NC(O)=NC2=C1NC=N2	quantified	C5H5N5O1	151.049	6	Metabolite
HMDB0000404	(4R)-4-[(1S,2S,4S,5S,7R,9R,10R,11S,14R,15R)-4,5,9-trihydroxy-2,15-dimethyltetracyclo[8.7.0.0?7.0????????,?]heptadecan-14-yl]pentanoic acid	2b,3a,7a-Trihydroxy-5b-cholanoic acid	[H][C@@]12CC[C@H]([C@H](C)CCC(O)=O)[C@@]1(C)CC[C@@]1([H])[C@@]2([H])[C@H](O)C[C@]2([H])C[C@H](O)[C@@H](O)C[C@]12C	expected	C24H40O5	408.288	5	Metabolite
HMDB0000405	(1S,10R,11S,14S,15S)-4-methoxy-15-methyltetracyclo[8.7.0.0^{2,7}.0^{11,15}]heptadeca-2(7),3,5-triene-5,14-diol	2-Methoxyestradiol	[H][C@@]12CC[C@H](O)[C@@]1(C)CC[C@]1([H])C3=C(CC[C@@]21[H])C=C(O)C(OC)=C3	quantified	C19H26O3	302.188	7	Metabolite
HMDB0000406	(1S,10R,11S,14R,15S)-5,14-dihydroxy-15-methyltetracyclo[8.7.0.0?7.0????????,?]heptadeca-2(7),3,5-trien-13-one	16-Ketoestradiol	[H][C@@]12CC(=O)[C@H](O)[C@@]1(C)CC[C@]1([H])C3=C(CC[C@@]21[H])C=C(O)C=C3	expected	C18H22O3	286.157	8	Metabolite
HMDB0000407	2-hydroxy-3-methylbutanoic acid	2-Hydroxy-3-methylbutyric acid	CC(C)C(O)C(O)=O	quantified	C5H10O3	118.063	1	Metabolite
HMDB0000408	2-methyl-3-oxopentanoic acid	2-Methyl-3-ketovaleric acid	CCC(=O)C(C)C(O)=O	quantified	C6H10O3	130.063	2	Metabolite
HMDB0000409	(5R)-5-hydroxyhexanoic acid	(5R)-5-Hydroxyhexanoic acid	C[C@@H](O)CCCC(O)=O	expected	C6H12O3	132.079	1	Metabolite
HMDB0000410	(2R,3R)-3-hydroxy-2-methylbutanoic acid	3-Hydroxy-2-methyl-[S-(R,R)]-butanoic acid	C[C@@H](O)[C@@H](C)C(O)=O	expected	C5H10O3	118.063	1	Metabolite
HMDB0000411	(4R)-4-[(1S,2S,5R,7R,10R,11S,14R,15R,16R)-5,16-dihydroxy-2,15-dimethyltetracyclo[8.7.0.0?7.0????????,?]heptadecan-14-yl]pentanoic acid	3a,12b-Dihydroxy-5b-cholanoic acid	[H][C@@]12CC[C@H]([C@H](C)CCC(O)=O)[C@@]1(C)[C@H](O)C[C@@]1([H])[C@@]2([H])CC[C@]2([H])C[C@H](O)CC[C@]12C	expected	C24H40O4	392.293	5	Metabolite
HMDB0000412	(2S,5S,14R,15S)-2,15-dimethyltetracyclo[8.7.0.0?7.0????????,?]heptadecane-5,14-diol	3b,17a-Dihydroxy-5a-androstane	C[C@]12CCC3C(CCC4C[C@@H](O)CC[C@]34C)C1CC[C@H]2O	expected	C19H32O2	292.24	4	Metabolite
HMDB0000413	3-hydroxydodecanedioic acid	3-Hydroxydodecanedioic acid	OC(CCCCCCCCC(O)=O)CC(O)=O	quantified	C12H22O5	246.147	2	Metabolite
HMDB0000414	(4R)-4-[(1S,2S,3R,5S,7S,9R,10S,11S,14R,15R)-3,5,9-trihydroxy-2,15-dimethyltetracyclo[8.7.0.0?7.0????????,?]heptadecan-14-yl]pentanoic acid	1b,3a,7a-Trihydroxy-5b-cholanoic acid	[H][C@@]12CC[C@H]([C@H](C)CCC(O)=O)[C@@]1(C)CC[C@@]1([H])[C@@]2([H])[C@H](O)C[C@]2([H])C[C@H](O)C[C@@H](O)[C@]12C	expected	C24H40O5	408.288	5	Metabolite
HMDB0000415	(4R)-4-[(1S,2R,5R,7R,8S,9R,10S,11S,14R,15R)-5,8,9-trihydroxy-2,15-dimethyltetracyclo[8.7.0.0?7.0????????,?]heptadecan-14-yl]pentanoic acid	3a,6b,7b-Trihydroxy-5b-cholanoic acid	[H][C@@]12CC[C@H]([C@H](C)CCC(O)=O)[C@@]1(C)CC[C@@]1([H])[C@@]2([H])[C@@H](O)[C@@H](O)[C@]2([H])C[C@H](O)CC[C@]12C	detected	C24H40O5	408.288	5	Metabolite
HMDB0000416	[(1S,2R,10R,11S,14R,15S)-14-acetyl-14-hydroxy-2,15-dimethyltetracyclo[8.7.0.0?7.0????????,?]heptadec-7-en-5-yl]oxidanesulfonic acid	17-Hydroxypregnenolone sulfate	[H][C@@]12CC[C@](O)(C(C)=O)[C@@]1(C)CC[C@@]1([H])[C@@]2([H])CC=C2CC(CC[C@]12C)OS(O)(=O)=O	quantified	C21H32O6S1	412.192	6	Metabolite
HMDB0000417	(3R,7R,11R)-3,7,11,15-tetramethylhexadecanoic acid	3D,7D,11D-Phytanic acid	CC(C)CCC[C@@H](C)CCC[C@@H](C)CCC[C@@H](C)CC(O)=O	detected	C20H40O2	312.303	1	Metabolite
HMDB0000418	(1S,2R,10S,11S,14S,15S,17S)-14,17-dihydroxy-14-(2-hydroxyacetyl)-15-(hydroxymethyl)-2-methyltetracyclo[8.7.0.0?7.0????????,?]heptadec-6-en-5-one	18-Hydroxycortisol	[H][C@@]12CC[C@@](O)(C(=O)CO)[C@@]1(CO)C[C@H](O)[C@@]1([H])[C@@]2([H])CCC2=CC(=O)CC[C@]12C	quantified	C21H30O6	378.204	7	Metabolite
HMDB0000419	(4R)-4-[(1S,2S,5S,7S,9R,10R,11S,14R,15R,16S)-5,9,16-trihydroxy-2,15-dimethyltetracyclo[8.7.0.0?7.0????????,?]heptadecan-14-yl]pentanoic acid	3b,7a,12a-Trihydroxy-5b-cholanoic acid	[H][C@@]12CC[C@H]([C@H](C)CCC(O)=O)[C@@]1(C)[C@@H](O)C[C@@]1([H])[C@@]2([H])[C@H](O)C[C@]2([H])C[C@@H](O)CC[C@]12C	expected	C24H40O5	408.288	5	Metabolite
HMDB0000421	2,3-dihydroxypentanoic acid	2,3-Dihydroxyvaleric acid	CCC(O)C(O)C(O)=O	expected	C5H10O4	134.058	1	Metabolite
HMDB0000422	2-methylpentanedioic acid	2-Methylglutaric acid	CC(CCC(O)=O)C(O)=O	quantified	C6H10O4	146.058	2	Metabolite
HMDB0000423	3-(3,4-dihydroxyphenyl)propanoic acid	3,4-Dihydroxyhydrocinnamic acid	OC(=O)CCC1=CC=C(O)C(O)=C1	quantified	C9H10O4	182.058	5	Metabolite
HMDB0000424	2-hydroxydecanedioic acid	2-Hydroxydecanedioic acid	OC(CCCCCCCC(O)=O)C(O)=O	quantified	C10H18O5	218.115	2	Metabolite
HMDB0000425	(4S,5R,6R,7R,8S)-4,5,6,7,8,9-hexahydroxy-2-oxononanoic acid	3-Deoxy-D-glycero-D-galacto-2-nonulosonic acid	OC[C@H](O)[C@@H](O)[C@H](O)[C@H](O)[C@@H](O)CC(=O)C(O)=O	expected	C9H16O9	268.079	2	Metabolite
HMDB0000426	2-hydroxy-2-methylbutanedioic acid	Citramalic acid	CC(O)(CC(O)=O)C(O)=O	quantified	C5H8O5	148.037	2	Metabolite
HMDB0000427	(4R)-4-[(1S,2S,5S,7R,9S,10R,11S,14R,15R,16S)-5,9,16-trihydroxy-2,15-dimethyltetracyclo[8.7.0.0?7.0????????,?]heptadecan-14-yl]pentanoic acid	3b,7b,12a-Trihydroxy-5a-Cholanoic acid	[H][C@@]12CC[C@H]([C@H](C)CCC(O)=O)[C@@]1(C)[C@@H](O)C[C@@]1([H])[C@@]2([H])[C@@H](O)C[C@@]2([H])C[C@@H](O)CC[C@]12C	expected	C24H40O5	408.288	5	Metabolite
HMDB0000428	3-hydroxypentanedioic acid	3-Hydroxyglutaric acid	OC(CC(O)=O)CC(O)=O	quantified	C5H8O5	148.037	2	Metabolite
HMDB0000429	(1S,10R,11S,14R,15S)-15-methyltetracyclo[8.7.0.0?7.0????????,?]heptadeca-2(7),3,5-triene-5,14-diol	17a-Estradiol	[H][C@@]12CC[C@@H](O)[C@@]1(C)CC[C@]1([H])C3=C(CC[C@@]21[H])C=C(O)C=C3	quantified	C18H24O2	272.178	7	Metabolite
HMDB0000430	(6R)-6-[(1R,3aS,4E,7aR)-4-{2-[(1Z,5R)-5-hydroxy-2-methylidenecyclohexylidene]ethylidene}-7a-methyl-octahydro-1H-inden-1-yl]-2-methylheptane-2,3-diol	24,25-Dihydroxyvitamin D	C[C@H](CCC(O)C(C)(C)O)[C@H]1CC[C@@]2([H])\C(CCC[C@]12C)=C\C=C1\C[C@H](O)CCC1=C	quantified	C27H44O3	416.329	6	Metabolite
HMDB0000431	(1S,10R,11S,13S,14S,15S)-15-methyltetracyclo[8.7.0.0?7.0????????,?]heptadeca-2(7),3,5-triene-5,13,14-triol	16,17-Epiestriol	[H][C@@]12C[C@H](O)[C@@H](O)[C@@]1(C)CC[C@]1([H])C3=C(CC[C@@]21[H])C=C(O)C=C3	expected	C18H24O3	288.173	7	Metabolite
HMDB0000432	(4R)-4-[(1S,2S,5R,7R,9S,10R,11S,14R,15R,16S)-5,9,16-trihydroxy-2,15-dimethyltetracyclo[8.7.0.0?7.0????????,?]heptadecan-14-yl]pentanoic acid	3a,7b,12a-Trihydroxy-5a-Cholanoic acid	[H][C@@]12CC[C@H]([C@H](C)CCC(O)=O)[C@@]1(C)[C@@H](O)C[C@@]1([H])[C@@]2([H])[C@@H](O)C[C@@]2([H])C[C@H](O)CC[C@]12C	expected	C24H40O5	408.288	5	Metabolite
HMDB0000433	(4R)-4-[(1S,2S,10S,11S,14R,15R)-3,5,9,16-tetrahydroxy-2,15-dimethyltetracyclo[8.7.0.0?7.0????????,?]heptadecan-14-yl]pentanoic acid	1,3,7,12-Tetrahydroxycholan-24-oic acid	[H][C@@]12CC[C@H]([C@H](C)CCC(O)=O)[C@@]1(C)C(O)C[C@@]1([H])[C@@]2([H])C(O)CC2CC(O)CC(O)[C@]12C	expected	C24H40O6	424.282	5	Metabolite
HMDB0000434	2-(3,4-dimethoxyphenyl)acetic acid	Homoveratric acid	COC1=CC=C(CC(O)=O)C=C1OC	quantified	C10H12O4	196.074	5	Metabolite
HMDB0000437	(4R)-4-[(1S,2R,5R,6R,7S,9R,10R,11S,14R,15R,16S)-5,6,9,16-tetrahydroxy-2,15-dimethyltetracyclo[8.7.0.0?7.0????????,?]heptadecan-14-yl]pentanoic acid	3a,4b,7a,12a-Tetrahydroxy-5b-cholanoic acid	[H][C@@]12CC[C@H]([C@H](C)CCC(O)=O)[C@@]1(C)[C@@H](O)C[C@@]1([H])[C@@]2([H])[C@H](O)C[C@]2([H])[C@@H](O)[C@H](O)CC[C@]12C	expected	C24H40O6	424.282	5	Metabolite
HMDB0000438	(4R)-4-[(1S,2S,5S,7R,10R,11S,14R,15R,16S)-5,16-dihydroxy-2,15-dimethyltetracyclo[8.7.0.0?7.0????????,?]heptadecan-14-yl]pentanoic acid	3b,12a-Dihydroxy-5b-cholanoic acid	[H][C@@]12CC[C@H]([C@H](C)CCC(O)=O)[C@@]1(C)[C@@H](O)C[C@@]1([H])[C@@]2([H])CC[C@]2([H])C[C@@H](O)CC[C@]12C	expected	C24H40O4	392.293	5	Metabolite
HMDB0000439	2-[(furan-2-yl)formamido]acetic acid	2-Furoylglycine	OC(=O)CNC(=O)C1=CC=CO1	quantified	C7H7N1O4	169.038	5	Metabolite
HMDB0000440	2-(3-hydroxyphenyl)acetic acid	3-Hydroxyphenylacetic acid	OC(=O)CC1=CC(O)=CC=C1	quantified	C8H8O3	152.047	5	Metabolite
HMDB0000442	(3S)-3-hydroxybutanoic acid	(S)-3-Hydroxybutyric acid	C[C@H](O)CC(O)=O	quantified	C4H8O3	104.047	1	Metabolite
HMDB0000444	furan-3-carboxylic acid	3-Furoic acid	OC(=O)C1=COC=C1	expected	C5H4O3	112.016	4	Metabolite
HMDB0000445	N-[(2R,3R,4R,5R,6R)-4,5-dihydroxy-2-{[(2R,3S,4S,5R,6S)-3-hydroxy-2-(hydroxymethyl)-6-{[(2R,3R,4R,5R)-1,2,4,5-tetrahydroxy-6-oxohexan-3-yl]oxy}-5-{[(2S,3S,4R,5S,6S)-3,4,5-trihydroxy-6-methyloxan-2-yl]oxy}oxan-4-yl]oxy}-6-(hydroxymethyl)oxan-3-yl]acetamide	Alpha-Tetrasaccharide	[H][C@@](O[C@@H]1O[C@H](CO)[C@H](O)[C@H](O[C@@]2([H])O[C@H](CO)[C@H](O)[C@H](O)[C@H]2NC(C)=O)[C@H]1O[C@]1([H])O[C@@H](C)[C@@H](O)[C@@H](O)[C@@H]1O)([C@H](O)CO)[C@H](O)[C@@H](O)C=O	expected	C26H45N1O20	691.253	5	Metabolite
HMDB0000446	6-amino-2-acetamidohexanoic acid	N-Alpha-acetyllysine	CC(=O)NC(CCCCN)C(O)=O	detected	C8H16N2O3	188.116	2	Metabolite
HMDB0000447	(4R)-4-[(1S,2R,9R,10R,11S,14R,15R,16S)-9,16-dihydroxy-2,15-dimethyl-5-oxotetracyclo[8.7.0.0?7.0????????,?]heptadec-6-en-14-yl]pentanoic acid	7a,12a-Dihydroxy-3-oxo-4-cholenoic acid	[H][C@@]12CC[C@H]([C@H](C)CCC(O)=O)[C@@]1(C)[C@@H](O)C[C@@]1([H])[C@@]2([H])[C@H](O)CC2=CC(=O)CC[C@]12C	expected	C24H36O5	404.256	7	Metabolite
HMDB0000448	hexanedioic acid	Adipic acid	OC(=O)CCCCC(O)=O	quantified	C6H10O4	146.058	2	Metabolite
HMDB0000449	1-[(1S,2S,5R,7S,10S,11S,14S,15S,17S)-5,17-dihydroxy-2,15-dimethyltetracyclo[8.7.0.0?7.0????????,?]heptadecan-14-yl]-2-hydroxyethan-1-one	5a-Tetrahydrocorticosterone	[H][C@@]12CC[C@H](C(=O)CO)[C@@]1(C)C[C@H](O)[C@@]1([H])[C@@]2([H])CC[C@@]2([H])C[C@H](O)CC[C@]12C	quantified	C21H34O4	350.246	5	Metabolite
HMDB0000450	(2S,5R)-2,6-diamino-5-hydroxyhexanoic acid	5-Hydroxylysine	NC[C@H](O)CC[C@H](N)C(O)=O	quantified	C6H14N2O3	162.1	1	Metabolite
HMDB0000451	2-(4-hydroxycyclohexyl)acetic acid	cis-4-Hydroxycyclohexylacetic acid	OC1CCC(CC(O)=O)CC1	quantified	C8H14O3	158.094	2	Metabolite
HMDB0000452	(2S)-2-aminobutanoic acid	L-alpha-Aminobutyric acid	CC[C@H](N)C(O)=O	quantified	C4H9N1O2	103.063	1	Metabolite
HMDB0000453	6-methyloxan-2-one	Delta-Hexanolactone	CC1CCCC(=O)O1	detected	C6H10O2	114.068	2	Metabolite
HMDB0000455	(2S)-2-amino-4-[(2-amino-2-carboxyethyl)sulfanyl]butanoic acid	Allocystathionine	N[C@@H](CCSCC(N)C(O)=O)C(O)=O	expected	C7H14N2O4S1	222.067	2	Metabolite
HMDB0000458	(1S,2S,5R,7S,10R,11S,14R,15S)-2,15-dimethyltetracyclo[8.7.0.0?7.0????????,?]heptadecane-5,14-diol	5a-Androstane-3a,17a-diol	[H][C@@]12CC[C@@H](O)[C@@]1(C)CC[C@@]1([H])[C@@]2([H])CC[C@@]2([H])C[C@H](O)CC[C@]12C	expected	C19H32O2	292.24	4	Metabolite
HMDB0000459	2-(3-methylbut-2-enamido)acetic acid	3-Methylcrotonylglycine	CC(C)=CC(=O)NCC(O)=O	quantified	C7H11N1O3	157.074	3	Metabolite
HMDB0000460	(4R)-4-[(1S,2S,7S,9S,10R,11S,15R)-9-hydroxy-2,15-dimethyl-5-oxotetracyclo[8.7.0.0?7.0????????,?]heptadecan-14-yl]pentanoic acid	7-Hydroxy-3-oxocholanoic acid	[H][C@@]12CCC([C@H](C)CCC(O)=O)[C@@]1(C)CC[C@@]1([H])[C@@]2([H])[C@@H](O)C[C@@]2([H])CC(=O)CC[C@]12C	expected	C24H38O4	390.277	6	Metabolite
HMDB0000462	(2,5-dioxoimidazolidin-4-yl)urea	Allantoin	NC(=O)NC1NC(=O)NC1=O	quantified	C4H6N4O3	158.044	4	Metabolite
HMDB0000464	calcium(2+) ion	Calcium	[Ca++]	quantified	Ca1H-2	37.9469	1	Adduct
HMDB0000466	3-methyl-1H-indole	3-Methylindole	CC1=CNC2=C1C=CC=C2	quantified	C9H9N1	131.073	6	Metabolite
HMDB0000467	(4S)-4-[(1S,2S,5R,7S,10R,11S,15R)-5-hydroxy-2,15-dimethyl-9-oxotetracyclo[8.7.0.0?7.0????????,?]heptadecan-14-yl]pentanoic acid	Nutriacholic acid	[H][C@@]12CCC([C@@H](C)CCC(O)=O)[C@@]1(C)CC[C@@]1([H])[C@@]2([H])C(=O)C[C@]2([H])C[C@H](O)CC[C@]12C	detected	C24H38O4	390.277	6	Metabolite
HMDB0000468	2-amino-6-[(1R,2S)-1,2-dihydroxypropyl]-1,4-dihydropteridin-4-one	Biopterin	C[C@H](O)[C@H](O)C1=NC2=C(NC(N)=NC2=O)N=C1	quantified	C9H11N5O3	237.086	7	Metabolite
HMDB0000469	5-(hydroxymethyl)-1,2,3,4-tetrahydropyrimidine-2,4-dione	5-Hydroxymethyluracil	OCC1=CNC(=O)NC1=O	quantified	C5H6N2O3	142.038	4	Metabolite
HMDB0000472	(2S)-2-amino-3-(5-hydroxy-1H-indol-3-yl)propanoic acid	5-Hydroxy-L-tryptophan	N[C@@H](CC1=CNC2=C1C=C(O)C=C2)C(O)=O	quantified	C11H12N2O3	220.085	7	Metabolite
HMDB0000473	N,N-dimethyl-7H-purin-6-amine	6-Dimethylaminopurine	CN(C)C1=NC=NC2=C1NC=N2	expected	C7H9N5	163.086	6	Metabolite
HMDB0000474	butan-2-one	Butanone	CCC(C)=O	quantified	C4H8O1	72.0575	1	Metabolite
HMDB0000476	(4R)-4-[(1S,2R,10S,11S,14R,15R)-2,15-dimethyl-5-oxotetracyclo[8.7.0.0?7.0????????,?]heptadeca-6,8-dien-14-yl]pentanoic acid	3-Oxo-4,6-choladienoic acid	[H][C@@]12CC[C@H]([C@H](C)CCC(O)=O)[C@@]1(C)CC[C@@]1([H])[C@@]2([H])C=CC2=CC(=O)CC[C@]12C	expected	C24H34O3	370.251	8	Metabolite
HMDB0000477	(7Z,10Z)-hexadeca-7,10-dienoic acid	7Z,10Z-Hexadecadienoic acid	CCCCC\C=C/C\C=C/CCCCCC(O)=O	detected	C16H28O2	252.209	3	Metabolite
HMDB0000478	(4R)-4-[(1S,2S,5R,7S,10R,11S,15R,16S)-5,16-dihydroxy-2,15-dimethyltetracyclo[8.7.0.0?7.0????????,?]heptadecan-14-yl]pentanoic acid	Allodeoxycholic acid	[H][C@@]12CCC([C@H](C)CCC(O)=O)[C@@]1(C)[C@@H](O)C[C@@]1([H])[C@@]2([H])CC[C@@]2([H])C[C@H](O)CC[C@]12C	expected	C24H40O4	392.293	5	Metabolite
HMDB0000479	(2S)-2-amino-3-(1-methyl-1H-imidazol-5-yl)propanoic acid	3-Methylhistidine	CN1C=NC=C1C[C@H](N)C(O)=O	quantified	C7H11N3O2	169.085	4	Metabolite
HMDB0000481	1-[(2R,3R,4S,5R)-3,4-dihydroxy-5-(hydroxymethyl)oxolan-2-yl]-1H,4H,7H-pyrazolo[3,4-d]pyrimidin-4-one	Allopurinol riboside	OC[C@H]1O[C@H]([C@H](O)[C@@H]1O)N1N=CC2=C1NC=NC2=O	quantified	C10H12N4O5	268.081	7	Metabolite
HMDB0000482	octanoic acid	Caprylic acid	CCCCCCCC(O)=O	quantified	C8H16O2	144.115	1	Metabolite
HMDB0000483	(1S,2S,5R,7S,9R,10R,15R,16S)-14-[(2S,4S)-4,6-dihydroxy-6-methylheptan-2-yl]-2,15-dimethyltetracyclo[8.7.0.0?7.0????????,?]heptadecane-5,9,16-triol	5b-Cholestane-3a,7a,12a,23S,25-pentol	[H]C1CC([C@@H](C)C[C@H](O)CC(C)(C)O)[C@]2(C)C1[C@]1([H])[C@H](O)C[C@]3([H])C[C@H](O)CC[C@]3(C)[C@@]1([H])C[C@@H]2O	detected	C27H48O5	452.35	4	Metabolite
HMDB0000484	4-hydroxy-3-methoxybenzoic acid	Vanillic acid	COC1=C(O)C=CC(=C1)C(O)=O	quantified	C8H8O4	168.042	5	Metabolite
HMDB0000486	7-hydroxyoctanoic acid	7-Hydroxyoctanoic acid	CC(O)CCCCCC(O)=O	quantified	C8H16O3	160.11	1	Metabolite
HMDB0000488	3-(2-{[3-(2-carboxyethyl)-5-{[(2E)-4-ethenyl-3-methyl-5-oxo-2,5-dihydro-1H-pyrrol-2-ylidene]methyl}-4-methyl-1H-pyrrol-2-yl]methyl}-5-{[(2Z)-3-ethenyl-4-methyl-5-oxo-2,5-dihydro-1H-pyrrol-2-ylidene]methyl}-4-methyl-1H-pyrrol-3-yl)propanoic acid	4E,15Z-Bilirubin IXa	CC1=C(C=C)\C(NC1=O)=C\C1=C(C)C(CCC(O)=O)=C(CC2=C(CCC(O)=O)C(C)=C(N2)\C=C2\NC(=O)C(C=C)=C2C)N1	expected	C33H36N4O6	584.263	18	Metabolite
HMDB0000489	(2S)-2-amino-3-{[(2R,3R,4R,5S,6R)-3-acetamido-4,5-dihydroxy-6-(hydroxymethyl)oxan-2-yl]carbamoyl}propanoic acid	Aspartylglycosamine	CC(=O)N[C@@H]1[C@@H](O)[C@H](O)[C@@H](CO)O[C@H]1NC(=O)C[C@H](N)C(O)=O	quantified	C12H21N3O8	335.133	4	Metabolite
HMDB0000490	(1S,2S,5R,7R,10R,11S,15S)-5-hydroxy-2,15-dimethyltetracyclo[8.7.0.0?7.0????????,?]heptadecan-14-one	Etiocholanolone	[H][C@@]12CCC(=O)[C@@]1(C)CC[C@@]1([H])[C@@]2([H])CC[C@]2([H])C[C@]([H])(O)CC[C@]12C	quantified	C19H30O2	290.225	5	Metabolite
HMDB0000491	3-methyl-2-oxopentanoic acid	3-Methyl-2-oxovaleric acid	CCC(C)C(=O)C(O)=O	quantified	C6H10O3	130.063	2	Metabolite
HMDB0000492	chloride	Chloride ion	[Cl-]	quantified	Cl1H1	35.9767	0	Adduct
HMDB0000493	(1S,2S,5S,7S,10R,11S,14S,15S)-2,15-dimethyltetracyclo[8.7.0.0?7.0????????,?]heptadecane-5,14-diol	5a-Androstane-3b,17b-diol	[H][C@]1(O)CC[C@@]2([H])[C@]3([H])CC[C@@]4([H])C[C@@]([H])(O)CC[C@]4(C)[C@@]3([H])CC[C@]12C	quantified	C19H32O2	292.24	4	Metabolite
HMDB0000494	(1S,2S,5S,10R,11S,14R,15R)-14-[(2R,5R)-5-ethyl-6-methylheptan-2-yl]-2,15-dimethyltetracyclo[8.7.0.0?7.0????????,?]heptadecan-5-ol	Stigmastanol	CC[C@H](CC[C@@H](C)[C@H]1CC[C@H]2[C@@H]3CCC4C[C@@H](O)CC[C@]4(C)[C@H]3CC[C@]12C)C(C)C	quantified	C29H52O1	416.402	4	Metabolite
HMDB0000495	(1S,2S,5R,7S,10R,11S,15S)-2,15-dimethyltetracyclo[8.7.0.0?7.0????????,?]heptadecane-5,14-diol	Androstanediol	[H][C@@]12CCC(O)[C@@]1(C)CC[C@@]1([H])[C@@]2([H])CC[C@@]2([H])C[C@H](O)CC[C@]12C	quantified	C19H32O2	292.24	4	Metabolite
HMDB0000496	(2S,3S,4S,5R,6S)-6-[4-(1,2-dihydroxyethyl)-2-methoxyphenoxy]-3,4,5-trihydroxyoxane-2-carboxylic acid	3-Methoxy-4-hydroxyphenylglycol glucuronide	COC1=CC(=CC=C1O[C@@H]1O[C@@H]([C@@H](O)[C@H](O)[C@H]1O)C(O)=O)C(O)CO	quantified	C15H20O10	360.106	6	Metabolite
HMDB0000497	1-[(2R,3R,4S,5R)-3,4-dihydroxy-5-(hydroxymethyl)oxolan-2-yl]-1,3-diazinane-2,4-dione	5,6-Dihydrouridine	OC[C@H]1O[C@H]([C@H](O)[C@@H]1O)N1CCC(=O)NC1=O	quantified	C9H14N2O6	246.085	4	Metabolite
HMDB0000498	(2R,3R)-2,3-dihydroxybutanoic acid	4-Deoxyerythronic acid	C[C@@H](O)[C@@H](O)C(O)=O	quantified	C4H8O4	120.042	1	Metabolite
HMDB0000499	(5Z)-tetradec-5-enoic acid	5-Tetradecenoic acid	CCCCCCCC\C=C\CCCC(O)=O	quantified	C14H26O2	226.193	2	Metabolite
HMDB0000500	4-hydroxybenzoic acid	4-Hydroxybenzoic acid	OC(=O)C1=CC=C(O)C=C1	quantified	C7H6O3	138.032	5	Metabolite
HMDB0000501	(1S,2R,10S,11S,15R)-5-hydroxy-2,15-dimethyl-14-[(2R)-6-methylheptan-2-yl]tetracyclo[8.7.0.0?7.0????????,?]heptadec-7-en-9-one	7-Ketocholesterol	[H][C@@]12CCC([C@H](C)CCCC(C)C)[C@@]1(C)CC[C@@]1([H])[C@@]2([H])C(=O)C=C2CC(O)CC[C@]12C	quantified	C27H44O2	400.334	6	Metabolite
HMDB0000502	(4R)-4-[(1S,2S,7R,9R,10R,11S,14R,15R,16S)-9,16-dihydroxy-2,15-dimethyl-5-oxotetracyclo[8.7.0.0^{2,7}.0^{11,15}]heptadecan-14-yl]pentanoic acid	3-Oxocholic acid	[H][C@@]1(CC[C@@]2([H])[C@]3([H])[C@H](O)C[C@]4([H])CC(=O)CC[C@]4(C)[C@@]3([H])C[C@H](O)[C@]12C)[C@H](C)CCC(O)=O	detected	C24H38O5	406.272	6	Metabolite
HMDB0000503	(4R)-4-[(1S,2S,7R,9R,10R,11S,14R,15R)-9-hydroxy-2,15-dimethyl-5-oxotetracyclo[8.7.0.0^{2,7}.0^{11,15}]heptadecan-14-yl]pentanoic acid	7alpha-Hydroxy-3-oxo-5beta-cholan-24-oic acid	[H][C@@]1(CC[C@@]2([H])[C@]3([H])[C@H](O)C[C@]4([H])CC(=O)CC[C@]4(C)[C@@]3([H])CC[C@]12C)[C@H](C)CCC(O)=O	expected	C24H38O4	390.277	6	Metabolite
HMDB0000505	(4R)-4-[(1S,2S,5R,7S,9R,10R,11S,14R,15R,16S)-5,9,16-trihydroxy-2,15-dimethyltetracyclo[8.7.0.0^{2,7}.0^{11,15}]heptadecan-14-yl]pentanoic acid	Allocholic acid	[H][C@@]1(CC[C@@]2([H])[C@]3([H])[C@H](O)C[C@@]4([H])C[C@H](O)CC[C@]4(C)[C@@]3([H])CC(O)[C@]12C)[C@H](C)CCC(O)=O	expected	C24H40O5	408.288	5	Metabolite
HMDB0000506	(4R)-4-[(1S,2R,5R,7R,8S,9S,10S,11S,15R)-5,8,9-trihydroxy-2,15-dimethyltetracyclo[8.7.0.0?7.0????????,?]heptadecan-14-yl]pentanoic acid	Alpha-Muricholic acid	[H][C@@]12CCC([C@H](C)CCC(O)=O)[C@@]1(C)CC[C@@]1([H])[C@@]2([H])[C@H](O)[C@@H](O)[C@]2([H])C[C@H](O)CC[C@]12C	expected	C24H40O5	408.288	5	Metabolite
HMDB0000508	(2R,3s,4S)-pentane-1,2,3,4,5-pentol	Ribitol	OC[C@H](O)[C@H](O)[C@H](O)CO	quantified	C5H12O5	152.068	0	Metabolite
HMDB0000509	3-methylbut-2-enoic acid	Senecioic acid	CC(C)=CC(O)=O	detected	C5H8O2	100.052	2	Metabolite
HMDB0000510	2-aminohexanedioic acid	Aminoadipic acid	NC(CCCC(O)=O)C(O)=O	quantified	C6H11N1O4	161.069	2	Metabolite
HMDB0000511	decanoic acid	Capric acid	CCCCCCCCCC(O)=O	quantified	C10H20O2	172.146	1	Metabolite
HMDB0000512	(2S)-2-acetamido-3-phenylpropanoic acid	N-Acetyl-L-phenylalanine	CC(=O)N[C@@H](CC1=CC=CC=C1)C(O)=O	detected	C11H13N1O3	207.09	6	Metabolite
HMDB0000513	(1S,2S,5R,7S,9R,10R,11S,14R,15R,16S)-14-[(2R,4R)-4,6-dihydroxy-6-methylheptan-2-yl]-2,15-dimethyltetracyclo[8.7.0.0?7.0????????,?]heptadecane-5,9,16-triol	5b-Cholestane-3a,7a,12a,23R,25-pentol	[H][C@@]1(CC[C@@]2([H])[C@]3([H])[C@H](O)C[C@]4([H])C[C@H](O)CC[C@]4(C)[C@@]3([H])C[C@H](O)[C@]12C)[C@H](C)C[C@@H](O)CC(C)(C)O	expected	C27H48O5	452.35	4	Metabolite
HMDB0000514	(4R)-4-[(1S,2S,5R,7R,9R,10R,11S,15R)-5,9-dihydroxy-2,15-dimethyltetracyclo[8.7.0.0?7.0????????,?]heptadecan-14-yl]pentanoic acid	Allochenodeoxycholic acid	[H][C@@]12CCC([C@H](C)CCC(O)=O)[C@@]1(C)CC[C@@]1([H])[C@@]2([H])[C@H](O)C[C@@]2([H])C[C@H](O)CC[C@]12C	expected	C24H40O4	392.293	5	Metabolite
HMDB0000516	(2R,3R,4S,5S,6R)-6-(hydroxymethyl)oxane-2,3,4,5-tetrol	Beta-D-Glucose	OC[C@H]1O[C@@H](O)[C@H](O)[C@@H](O)[C@@H]1O	detected	C6H12O6	180.063	1	Metabolite
HMDB0000517	(2S)-2-amino-5-carbamimidamidopentanoic acid	L-Arginine	N[C@@H](CCCNC(N)=N)C(O)=O	quantified	C6H14N4O2	174.112	2	Metabolite
HMDB0000518	(4R)-4-[(1S,2S,5R,7S,9R,10R,11S,14R,15R)-5,9-dihydroxy-2,15-dimethyltetracyclo[8.7.0.0?7.0????????,?]heptadecan-14-yl]pentanoic acid	Chenodeoxycholic acid	[H][C@@]1(CC[C@@]2([H])[C@]3([H])[C@H](O)C[C@]4([H])C[C@H](O)CC[C@]4(C)[C@@]3([H])CC[C@]12C)[C@H](C)CCC(O)=O	quantified	C24H40O4	392.293	5	Metabolite
HMDB0000520	(1S,2S,5R,7R,9R,10R,11S,15R,16S)-14-[(2R)-6-hydroxy-6-methylheptan-2-yl]-2,15-dimethyltetracyclo[8.7.0.0?7.0????????,?]heptadecane-5,9,16-triol	5a-Cholestane-3a,7a,12a,25-tetrol	[H][C@@]12CCC([C@H](C)CCCC(C)(C)O)[C@@]1(C)[C@@H](O)C[C@@]1([H])[C@@]2([H])[C@H](O)C[C@@]2([H])C[C@H](O)CC[C@]12C	detected	C27H48O4	436.355	4	Metabolite
HMDB0000521	(5Z)-tetradec-5-enoic acid	5Z-Tetradecenoic acid	CCCCCCCC\C=C/CCCC(O)=O	quantified	C14H26O2	226.193	2	Metabolite
HMDB0000522	(2E)-3-methylpent-2-enedioic acid	3-Methylglutaconic acid	C\C(CC(O)=O)=C/C(O)=O	quantified	C6H8O4	144.042	3	Metabolite
HMDB0000523	(1S,2R,5S,10R,11S,13S,14S,15S)-2,15-dimethyltetracyclo[8.7.0.0?7.0????????,?]heptadec-7-ene-5,13,14-triol	5-Androstene-3b,16b,17a-triol	[H][C@@]12C[C@H](O)[C@@H](O)[C@@]1(C)CC[C@@]1([H])[C@@]2([H])CC=C2C[C@@H](O)CC[C@]12C	expected	C19H30O3	306.219	5	Metabolite
HMDB0000524	(1S,2S,5R,7S,9R,10R,11S,14R,15R,16S)-14-[(2R)-6-hydroxy-6-methylheptan-2-yl]-2,15-dimethyltetracyclo[8.7.0.0^{2,7}.0^{11,15}]heptadecane-5,9,16-triol	5beta-Cholestane-3alpha,7alpha,12alpha,25-tetrol	[H][C@@]1(CC[C@@]2([H])[C@]3([H])[C@H](O)C[C@]4([H])C[C@H](O)CC[C@]4(C)[C@@]3([H])C[C@H](O)[C@]12C)[C@H](C)CCCC(C)(C)O	expected	C27H48O4	436.355	4	Metabolite
HMDB0000525	5-hydroxyhexanoic acid	5-Hydroxyhexanoic acid	CC(O)CCCC(O)=O	quantified	C6H12O3	132.079	1	Metabolite
HMDB0000526	2-hydroxy-1-[(1S,2S,5R,7S,10S,11S,14R,15S,17S)-5,14,17-trihydroxy-2,15-dimethyltetracyclo[8.7.0.0?7.0????????,?]heptadecan-14-yl]ethan-1-one	5a-Tetrahydrocortisol	[H][C@@]12CC[C@](O)(C(=O)CO)[C@@]1(C)C[C@H](O)[C@@]1([H])[C@@]2([H])CC[C@@]2([H])C[C@H](O)CC[C@]12C	quantified	C21H34O5	366.241	5	Metabolite
HMDB0000527	(4R)-4-[(1S,2R,5R,8S,10R,11S,14R,15R,16S)-5,8,16-trihydroxy-2,15-dimethyltetracyclo[8.7.0.0?7.0????????,?]heptadecan-14-yl]pentanoic acid	6a,12a-Dihydroxylithocholic acid	[H][C@@]12CC[C@H]([C@H](C)CCC(O)=O)[C@@]1(C)[C@@H](O)C[C@@]1([H])[C@@]2([H])C[C@H](O)C2C[C@H](O)CC[C@]12C	expected	C24H40O5	408.288	5	Metabolite
HMDB0000528	2,6-dioxo-1,3-diazinane-4-carboxylic acid	4,5-Dihydroorotic acid	OC(=O)C1CC(=O)NC(=O)N1	detected	C5H6N2O4	158.033	4	Metabolite
HMDB0000529	(5Z)-dodec-5-enoic acid	5Z-Dodecenoic acid	CCCCCC\C=C/CCCC(O)=O	detected	C12H22O2	198.162	2	Metabolite
HMDB0000530	(1S,10R,11S,13R,14R,15S)-5,13,14-trihydroxy-15-methyltetracyclo[8.7.0.0?7.0????????,?]heptadeca-2(7),3,5-trien-8-one	6-Ketoestriol	[H][C@@]12C[C@@H](O)[C@H](O)[C@@]1(C)CC[C@]1([H])C3=C(C=C(O)C=C3)C(=O)C[C@@]21[H]	expected	C18H22O4	302.152	8	Metabolite
HMDB0000531	3-hydroxypentanoic acid	3-Hydroxyvaleric acid	CCC(O)CC(O)=O	quantified	C5H10O3	118.063	1	Metabolite
HMDB0000532	2-acetamidoacetic acid	Acetylglycine	CC(=O)NCC(O)=O	quantified	C4H7N1O3	117.043	2	Metabolite
HMDB0000534	(1S,2S,10R,11S,14R,15R)-14-[(2R,5R)-5,6-dimethylheptan-2-yl]-2,15-dimethyltetracyclo[8.7.0.0?7.0????????,?]heptadecan-5-ol	Campestanol	[H][C@@]12CC[C@H]([C@H](C)CC[C@@H](C)C(C)C)[C@@]1(C)CC[C@@]1([H])[C@@]2([H])CCC2CC(O)CC[C@]12C	quantified	C28H50O1	402.386	4	Metabolite
HMDB0000535	hexanoic acid	Caproic acid	CCCCCC(O)=O	quantified	C6H12O2	116.084	1	Metabolite
HMDB0000536	2-({9-[(2R,3R,4S,5R)-3,4-dihydroxy-5-[(phosphonooxy)methyl]oxolan-2-yl]-9H-purin-6-yl}amino)butanedioic acid	Adenylsuccinic acid	O[C@@H]1[C@@H](COP(O)(O)=O)O[C@H]([C@@H]1O)N1C=NC2=C1N=CN=C2NC(CC(O)=O)C(O)=O	expected	C14H18N5O11P1	463.074	9	Metabolite
HMDB0000538	({[({[(2R,3S,4R,5R)-5-(6-amino-9H-purin-9-yl)-3,4-dihydroxyoxolan-2-yl]methoxy}(hydroxy)phosphoryl)oxy](hydroxy)phosphoryl}oxy)phosphonic acid	Adenosine triphosphate	NC1=NC=NC2=C1N=CN2[C@@H]1O[C@H](COP(O)(=O)OP(O)(=O)OP(O)(O)=O)[C@@H](O)[C@H]1O	quantified	C10H16N5O13P3	506.996	7	Metabolite
HMDB0000539	(2S,3R,4R)-2,3,4,5-tetrahydroxypentanoic acid	Arabinonic acid	OC[C@@H](O)[C@@H](O)[C@H](O)C(O)=O	detected	C5H10O6	166.048	1	Metabolite
HMDB0000540	(1S,2R,5S,10R,11S,13R,14S,15S)-2,15-dimethyltetracyclo[8.7.0.0?7.0????????,?]heptadec-7-ene-5,13,14-triol	5-Androstene-3b,16a,17a-triol	[H][C@@]12C[C@@H](O)[C@@H](O)[C@@]1(C)CC[C@@]1([H])[C@@]2([H])CC=C2C[C@@H](O)CC[C@]12C	expected	C19H30O3	306.219	5	Metabolite
HMDB0000541	methyl (4R)-4-[(1S,2S,10R,11S,14R,15R)-2,15-dimethyl-5,9-dioxotetracyclo[8.7.0.0?7.0????????,?]heptadecan-14-yl]pentanoate	7b-Hydroxy-3-oxo-5b-cholanoic acid	[H][C@@]12CC[C@H]([C@H](C)CCC(=O)OC)[C@@]1(C)CC[C@@]1([H])[C@@]2([H])C(=O)CC2CC(=O)CC[C@]12C	expected	C25H38O4	402.277	7	Metabolite
HMDB0000542	6-amino-7H-purin-8-ol	8-Hydroxyadenine	NC1=NC=NC2=C1NC(O)=N2	expected	C5H5N5O1	151.049	6	Metabolite
HMDB0000543	4-phenylbutanoic acid	Benzenebutanoic acid	OC(=O)CCCC1=CC=CC=C1	expected	C10H12O2	164.084	5	Metabolite
HMDB0000544	5-(hydroxymethyl)-6-methyl-1,2,3,4-tetrahydropyrimidine-2,4-dione	5-Hydroxymethyl-4-methyluracil	CC1=C(CO)C(=O)NC(=O)N1	expected	C6H8N2O3	156.053	4	Metabolite
HMDB0000545	(4R)-4-[(1S,2S,5R,7S,9R,10R,11S,14R,15R)-2,15-dimethyl-5,9-bis(sulfooxy)tetracyclo[8.7.0.0?7.0????????,?]heptadecan-14-yl]pentanoic acid	Chenodeoxycholic acid disulfate	[H][C@@]1(CC[C@@]2([H])[C@]3([H])[C@@H](C[C@]4([H])C[C@@H](CC[C@]4(C)[C@@]3([H])CC[C@]12C)OS(O)(=O)=O)OS(O)(=O)=O)[C@H](C)CCC(O)=O	expected	C24H40O10S2	552.206	5	Metabolite
HMDB0000546	(1S,2S,5S,7R,10R,11S,15S)-5-hydroxy-2,15-dimethyltetracyclo[8.7.0.0?7.0????????,?]heptadecan-14-one	Epietiocholanolone	[H][C@@]12CCC(=O)[C@@]1(C)CC[C@@]1([H])[C@@]2([H])CC[C@]2([H])C[C@@H](O)CC[C@]12C	quantified	C19H30O2	290.225	5	Metabolite
HMDB0000548	1,3-bis(decanoyloxy)propan-2-yl decanoate	TG(10:0/10:0/10:0)	[H]C(COC(=O)CCCCCCCCC)(COC(=O)CCCCCCCCC)OC(=O)CCCCCCCCC	expected	C33H62O6	554.455	3	Metabolite
HMDB0000549	oxolan-2-one	Gamma-Butyrolactone	O=C1CCCO1	quantified	C4H6O2	86.0368	2	Metabolite
HMDB0000550	(1S,2R,5S,10R,11S,13R,14R,15S)-2,15-dimethyltetracyclo[8.7.0.0?7.0????????,?]heptadec-7-ene-5,13,14-triol	5-Androstenetriol	[H][C@@]12C[C@@H](O)[C@H](O)[C@@]1(C)CC[C@@]1([H])[C@@]2([H])CC=C2C[C@@H](O)CC[C@]12C	quantified	C19H30O3	306.219	5	Metabolite
HMDB0000551	(1S,2S,5R,7R,10R,11S,14S,15S)-2,15-dimethyltetracyclo[8.7.0.0?7.0????????,?]heptadecane-5,14-diol	Etiocholanediol	[H][C@@]12CC[C@H](O)[C@@]1(C)CC[C@@]1([H])[C@@]2([H])CC[C@]2([H])C[C@H](O)CC[C@]12C	quantified	C19H32O2	292.24	4	Metabolite
HMDB0000552	3-[(4-carboxy-3-methylbutanoyl)oxy]-4-(trimethylazaniumyl)butanoate	3-Methylglutarylcarnitine	CC(CC(O)=O)CC(=O)OC(CC([O-])=O)C[N+](C)(C)C	quantified	C13H23N1O6	289.153	3	Metabolite
HMDB0000553	(3S,7R,11R)-3,7,11,15-tetramethylhexadecanoic acid	3L,7D,11D-Phytanic acid	CC(C)CCC[C@@H](C)CCC[C@@H](C)CCC[C@H](C)CC(O)=O	detected	C20H40O2	312.303	1	Metabolite
HMDB0000554	(1S,2S,5R,7S,10R,11S,14S,15S)-2,15-dimethyltetracyclo[8.7.0.0?7.0????????,?]heptadecane-5,14-diol	Dihydroandrosterone	[H][C@@]12CC[C@H](O)[C@@]1(C)CC[C@@]1([H])[C@@]2([H])CC[C@@]2([H])C[C@H](O)CC[C@]12C	quantified	C19H32O2	292.24	4	Metabolite
HMDB0000555	(3S)-3-methylhexanedioic acid	3-Methyladipic acid	C[C@@H](CCC(O)=O)CC(O)=O	quantified	C7H12O4	160.074	2	Metabolite
HMDB0000556	(1S,2S,5R,9R,10R,11S,14R,15R,16S)-14-[(2R)-5,6-dihydroxy-6-methylheptan-2-yl]-2,15-dimethyltetracyclo[8.7.0.0?7.0????????,?]heptadecane-5,9,16-triol	5b-Cholestane-3a,7a,12a,24,25-pentol	[H][C@@]12CC[C@H]([C@H](C)CCC(O)C(C)(C)O)[C@@]1(C)[C@@H](O)C[C@@]1([H])[C@@]2([H])[C@H](O)CC2C[C@H](O)CC[C@]12C	expected	C27H48O5	452.35	4	Metabolite
HMDB0000557	(2S,3R)-2-amino-3-methylpentanoic acid	L-Alloisoleucine	CC[C@@H](C)[C@H](N)C(O)=O	quantified	C6H13N1O2	131.095	1	Metabolite
HMDB0000558	(1S,2S,5R,7R,9R,10R,11S,14R,15R,16S)-14-[(2S)-4,6-dihydroxy-6-methylheptan-2-yl]-2,15-dimethyltetracyclo[8.7.0.0?7.0????????,?]heptadecane-5,9,16-triol	5a-Cholestane-3a,7a,12a,23,25-pentol	[H][C@@]12CC[C@H]([C@@H](C)CC(O)CC(C)(C)O)[C@@]1(C)[C@@H](O)C[C@@]1([H])[C@@]2([H])[C@H](O)C[C@@]2([H])C[C@H](O)CC[C@]12C	expected	C27H48O5	452.35	4	Metabolite
HMDB0000559	[4-(1,2-dihydroxyethyl)-2-methoxyphenyl]oxidanesulfonic acid	3-Methoxy-4-hydroxyphenylethyleneglycol sulfate	COC1=C(OS(O)(=O)=O)C=CC(=C1)C(O)CO	expected	C9H12O7S1	264.03	4	Metabolite
HMDB0000560	(5Z,8Z)-tetradeca-5,8-dienoic acid	Goshuyic acid	CCCCC\C=C/C\C=C/CCCC(O)=O	expected	C14H24O2	224.178	3	Metabolite
HMDB0000561	1,3,3-trimethyl-2-[(1E,3E,5E,7Z,9Z,11E,13E,15E,17E)-3,7,12,16-tetramethyl-18-(2,6,6-trimethylcyclohex-1-en-1-yl)octadeca-1,3,5,7,9,11,13,15,17-nonaen-1-yl]cyclohex-1-ene	B-Carotene	C\C(\C=C\C=C(/C)\C=C\C1=C(C)CCCC1(C)C)=C/C=C/C=C(\C)/C=C/C=C(\C)/C=C/C1=C(C)CCCC1(C)C	quantified	C40H56	536.438	13	Metabolite
HMDB0000562	2-imino-1-methylimidazolidin-4-one	Creatinine	CN1CC(=O)NC1=N	quantified	C4H7N3O1	113.059	3	Metabolite
HMDB0000563	(2S)-2-hydroxy-3-phenylpropanoic acid	D-Phenyllactic acid	[H][C@](O)(CC1=CC=CC=C1)C(O)=O	detected	C9H10O3	166.063	5	Metabolite
HMDB0000564	(2-{[(2R)-2,3-bis(hexadecanoyloxy)propyl phosphono]oxy}ethyl)trimethylazanium	PC(16:0/16:0)	[H][C@@](COC(=O)CCCCCCCCCCCCCCC)(COP([O-])(=O)OCC[N+](C)(C)C)OC(=O)CCCCCCCCCCCCCCC	quantified	C40H80N1O8P1	733.562	2	Metabolite
HMDB0000565	(2R,3S,4S,5R)-2,3,4,5,6-pentahydroxyhexanoic acid	Galactonic acid	OC[C@@H](O)[C@H](O)[C@H](O)[C@@H](O)C(O)=O	quantified	C6H12O7	196.058	1	Metabolite
HMDB0000567	(2Z)-3-phenylprop-2-enoic acid	Cinnamic acid	OC(=O)\C=C/C1=CC=CC=C1	quantified	C9H8O2	148.052	6	Metabolite
HMDB0000568	(2R,4R)-pentane-1,2,3,4,5-pentol	D-Arabitol	OC[C@@H](O)C(O)[C@H](O)CO	quantified	C5H12O5	152.068	0	Metabolite
HMDB0000569	4-[(2S)-2-amino-2-carboxyethyl]-3-[(3S)-3-amino-3-carboxylatopropyl]-1-[(5S)-5-amino-5-carboxypentyl]-5-hydroxypyridin-1-ium	Deoxypyridinoline	N[C@@H](CCCC[N+]1=CC(CC[C@H](N)C([O-])=O)=C(C[C@H](N)C(O)=O)C(O)=C1)C(O)=O	quantified	C18H28N4O7	412.196	7	Metabolite
HMDB0000570	3-[10,14,19-tris(2-carboxyethyl)-5,9,15,20-tetramethyl-21,22,23,24-tetraazapentacyclo[16.2.1.1?6.18,????????.1????????,?]tetracosa-1(21),2,4,6,8(23),9,11,13,15,17,19-undecaen-4-yl]propanoic acid	Coproporphyrin III	CC1=C(CCC(O)=O)/C2=C/C3=N/C(=C\C4=C(C)C(CCC(O)=O)=C(N4)/C=C4\N=C(\C=C\1/N\2)C(C)=C4CCC(O)=O)/C(CCC(O)=O)=C3C	quantified	C36H38N4O8	654.269	20	Metabolite
HMDB0000572	3,5-bis[(3S)-3-amino-3-carboxypropyl]-4-[(4S)-4-amino-4-carboxybutyl]-1-(5-amino-5-carboxypentyl)pyridin-1-ium	Desmosine	NC(CCCC[N+]1=CC(CC[C@H](N)C(O)=O)=C(CCC[C@H](N)C(O)=O)C(CC[C@H](N)C(O)=O)=C1)C(O)=O	quantified	C24H39N5O8	525.28	8	Metabolite
HMDB0000573	(9E)-octadec-9-enoic acid	Elaidic acid	CCCCCCCC\C=C\CCCCCCCC(O)=O	quantified	C18H34O2	282.256	2	Metabolite
HMDB0000574	(2R)-2-amino-3-sulfanylpropanoic acid	L-Cysteine	N[C@@H](CS)C(O)=O	quantified	C3H7N1O2S1	121.02	1	Metabolite
HMDB0000575	2-amino-4-[(3-amino-3-carboxypropyl)disulfanyl]butanoic acid	DL-Homocystine	NC(CCSSCCC(N)C(O)=O)C(O)=O	quantified	C8H16N2O4S2	268.055	2	Metabolite
HMDB0000576	3-ethoxy-3-oxopropanoic acid	Monoethyl malonic acid	CCOC(=O)CC(O)=O	expected	C5H8O4	132.042	2	Metabolite
HMDB0000577	(1S,2S,5S,7R,10R,11S,14R,15R)-2,15-dimethyl-14-[(2R)-6-methylheptan-2-yl]tetracyclo[8.7.0.0?7.0????????,?]heptadecan-5-ol	5beta-Coprostanol	[H][C@@]1(CC[C@@]2([H])[C@]3([H])CC[C@]4([H])C[C@@H](O)CC[C@]4(C)[C@@]3([H])CC[C@]12C)[C@H](C)CCCC(C)C	detected	C27H48O1	388.371	4	Metabolite
HMDB0000579	3-[20-(2-carboxyethyl)-5,10,15,19-tetramethyl-21,22,23,24-tetraazapentacyclo[16.2.1.1?6.18,????????.1????????,?]tetracosa-1(20),2,4,6(24),7,9,11,13(22),14,16,18-undecaen-4-yl]propanoic acid	Deuteroporphyrin IX	CC1=C/C2=C/C3=N/C(=C\C4=C(CCC(O)=O)C(C)=C(N4)/C=C4\N=C(C=C4C)\C=C\1/N\2)/C(CCC(O)=O)=C3C	expected	C30H30N4O4	510.227	18	Metabolite
HMDB0000580	(2S,3S,4S,5R,6R)-6-{[(2R,3R,4R,5R,6R)-3-acetamido-2,5-dihydroxy-6-(sulfooxy)oxan-4-yl]oxy}-3,4,5-trihydroxyoxane-2-carboxylic acid	Chondroitin sulfate	CC(=O)N[C@H]1[C@H](O)O[C@H](OS(O)(=O)=O)[C@H](O)[C@@H]1O[C@@H]1O[C@@H]([C@@H](O)[C@H](O)[C@H]1O)C(O)=O	quantified	C13H21N1O15S1	463.063	4	Metabolite
HMDB0000582	2-amino-3-[4-(4-hydroxyphenoxy)-3,5-diiodophenyl]propanoic acid	3,5-Diiodothyronine	NC(CC1=CC(I)=C(OC2=CC=C(O)C=C2)C(I)=C1)C(O)=O	quantified	C15H13I2N1O4	524.893	9	Metabolite
HMDB0000583	docosanamide	Docosanamide	CCCCCCCCCCCCCCCCCCCCCC(N)=O	expected	C22H45N1O1	339.35	1	Metabolite
HMDB0000585	(2S)-2,6-diamino-5-{[(2R,3R,4S,5R,6R)-4,5-dihydroxy-6-(hydroxymethyl)-3-{[(2R,3R,5S,6R)-3,4,5-trihydroxy-6-(hydroxymethyl)oxan-2-yl]oxy}oxan-2-yl]oxy}hexanoic acid	Glucosylgalactosyl hydroxylysine	NCC(CC[C@H](N)C(O)=O)O[C@@H]1O[C@H](CO)[C@H](O)[C@H](O)[C@H]1O[C@H]1O[C@H](CO)[C@@H](O)C(O)[C@H]1O	quantified	C18H34N2O13	486.206	3	Metabolite
HMDB0000586	potassium(1+) ion	Potassium	[K+]	quantified	H-1K1	37.9559	1	Adduct
HMDB0000590	4-[(carboxymethyl)carbamoyl]butanoic acid	Glutarylglycine	OC(=O)CCCC(=O)NCC(O)=O	quantified	C7H11N1O5	189.064	3	Metabolite
HMDB0000592	{[(2R,3S,4R,5R,6R)-5-amino-3,4,6-trihydroxyoxan-2-yl]methoxy}sulfonic acid	Glucosamine 6-sulfate	N[C@H]1[C@H](O)O[C@H](COS(O)(=O)=O)[C@@H](O)[C@@H]1O	expected	C6H13N1O8S1	259.036	1	Metabolite
HMDB0000593	[2-({2,3-bis[(9Z)-octadec-9-enoyloxy]propyl phosphonato}oxy)ethyl]trimethylazanium	PC(18:1(9Z)/18:1(9Z))	CCCCCCCC\C=C/CCCCCCCC(=O)OCC(COP([O-])(=O)OCC[N+](C)(C)C)OC(=O)CCCCCCC\C=C/CCCCCCCC	quantified	C44H84N1O8P1	785.593	4	Metabolite
HMDB0000594	(2S)-2-amino-4-{[(1S)-1-carboxy-2-phenylethyl]carbamoyl}butanoic acid	gamma-Glutamylphenylalanine	N[C@@H](CCC(=O)N[C@@H](CC1=CC=CC=C1)C(O)=O)C(O)=O	quantified	C14H18N2O5	294.122	7	Metabolite
HMDB0000595	carbonic acid	Hydrogen carbonate	OC(O)=O	quantified	C1H2O3	62.0004	1	Adduct
HMDB0000596	(3R,4S,5S,6R)-2-{[(4E)-2-amino-3-hydroxyoctadec-4-en-1-yl]oxy}-6-(hydroxymethyl)oxane-3,4,5-triol	Glucosylsphingosine	CCCCCCCCCCCCC\C=C\C(O)C(N)COC1O[C@H](CO)[C@@H](O)[C@H](O)[C@H]1O	expected	C24H47N1O7	461.335	2	Metabolite
HMDB0000598	sulfanediide	Sulfide	[S--]	quantified	H2S1	33.9877	0	Adduct
HMDB0000599	chromium(3+) ion	Chromium	[Cr+3]	quantified	Cr1H-3	48.917	2.5	Adduct
HMDB0000600	(2S)-6-amino-2-{N-hydroxy[(3R,4S,5R,6R)-3,4,5-trihydroxy-6-(hydroxymethyl)oxan-2-yl]amino}hexanoic acid	Galactosylhydroxylysine	NCCCC[C@H](N(O)C1O[C@H](CO)[C@H](O)[C@H](O)[C@H]1O)C(O)=O	quantified	C12H24N2O8	324.153	2	Metabolite
HMDB0000601	(6R)-2-methyl-6-[(1S,2S,5R,7S,9R,10R,11S,14R,15R,16S)-5,9,16-trihydroxy-2,15-dimethyltetracyclo[8.7.0.0^{2,7}.0^{11,15}]heptadecan-14-yl]heptanoic acid	Coprocholic acid	[H][C@@]1(CC[C@@]2([H])[C@]3([H])[C@H](O)C[C@]4([H])C[C@H](O)CC[C@]4(C)[C@@]3([H])C[C@H](O)[C@]12C)[C@H](C)CCCC(C)C(O)=O	quantified	C27H46O5	450.335	5	Metabolite
HMDB0000603	(4Z)-dec-4-enedioic acid	cis-4-Decenedioic acid	OC(=O)CCCC\C=C/CCC(O)=O	quantified	C10H16O4	200.105	3	Metabolite
HMDB0000606	(2R)-2-hydroxypentanedioic acid	D-2-Hydroxyglutaric acid	O[C@H](CCC(O)=O)C(O)=O	quantified	C5H8O5	148.037	2	Metabolite
HMDB0000607	[(1R,2R,3S,4S,8S,9S,14S,18R,19R)-4,9,14-tris(2-carbamoylethyl)-3,8,19-tris(carbamoylmethyl)-18-(2-{[(2R)-2-[({[(2R,3S,4R,5S)-5-(5,6-dimethyl-1H-1,3-benzodiazol-1-yl)-4-hydroxy-2-(hydroxymethyl)oxolan-3-yl]oxy}(hydroxy)phosphoryl)oxy]propyl]carbamoyl}ethyl)-2,3,6,8,13,13,16,18-octamethyl-20,21,22,23-tetraazapentacyclo[15.2.1.1?5.17,????????.1????????,?]tricosa-5(23),6,10(22),11,15(21),16-hexaen-20…	Cyanocobalamin	OC[C@H]1O[C@@H]([C@H](O)[C@@H]1OP(O)(=O)O[C@]([H])(C)CNC(=O)CC[C@]1(C)[C@@H](CC(=O)N)[C@@]2([H])N([Co]C#N)\C1=C(C)/C1=N/C(=C\C3=N\C(=C(C)/C4=N[C@]2(C)[C@@](C)(CC(=O)N)[C@@H]4CCC(=O)N)\[C@@](C)(CC(=O)N)[C@@H]3CCC(=O)N)/C(C)(C)[C@@H]1CCC(=O)N)N1C=NC2=CC(C)=C(C)C=C12	quantified	C63Co1H89N14O14P1	1355.58	27	Metabolite
HMDB0000608	<U+03BB>?cobalt(2+) ion	Cobalt	[Co++]	quantified	Co1H-2	56.9175	2	Adduct
HMDB0000609	2-amino-3-(3,4-dihydroxyphenyl)propanoic acid	DL-Dopa	NC(CC1=CC=C(O)C(O)=C1)C(O)=O	quantified	C9H11N1O4	197.069	5	Metabolite
HMDB0000610	(2R,5S,15R)-2,15-dimethyl-14-[(2R)-6-methylheptan-2-yl]tetracyclo[8.7.0.0^{2,7}.0^{11,15}]heptadec-7-en-5-yl (9Z,12Z)-octadeca-9,12-dienoate	CE(18:2(9Z,12Z))	CCCCC\C=C/C\C=C/CCCCCCCC(=O)O[C@H]1CC[C@]2(C)C3CC[C@]4(C)C(CCC4C3CC=C2C1)[C@H](C)CCCC(C)C	quantified	C45H76O2	648.585	8	Metabolite
HMDB0000611	3-[10,14,20-tris(2-carboxyethyl)-5,9,15,19-tetramethyl-21,22,23,24-tetraazapentacyclo[16.2.1.1?6.18,????????.1????????,?]tetracosa-1(21),2,4,6,8(23),9,11,13,15,17,19-undecaen-4-yl]propanoic acid	Coproporphyrin II	CC1=C(CCC(O)=O)/C2=C/C3=N/C(=C\C4=C(C)C(CCC(O)=O)=C(N4)/C=C4\N=C(\C=C\1/N\2)C(C)=C4CCC(O)=O)/C(C)=C3CCC(O)=O	expected	C36H38N4O8	654.269	20	Metabolite
HMDB0000613	(2R,3R)-2,3,4-trihydroxybutanoic acid	Erythronic acid	OC[C@@H](O)[C@@H](O)C(O)=O	quantified	C4H8O5	136.037	1	Metabolite
HMDB0000614	(2S)-2-amino-3-({[(2R)-2,3-bis(hexadecanoyloxy)propoxy](hydroxy)phosphoryl}oxy)propanoic acid	PS(16:0/16:0)	[H][C@](N)(COP(O)(=O)OC[C@@]([H])(COC(=O)CCCCCCCCCCCCCCC)OC(=O)CCCCCCCCCCCCCCC)C(O)=O	expected	C38H74N1O10P1	735.505	3	Metabolite
HMDB0000617	furan-2-carboxylic acid	2-Furoic acid	OC(=O)C1=CC=CO1	quantified	C5H4O3	112.016	4	Metabolite
HMDB0000618	{[(2R,3R)-2,3,5-trihydroxy-4-oxopentyl]oxy}phosphonic acid	D-Ribulose 5-phosphate	OCC(=O)[C@H](O)[C@H](O)COP(O)(O)=O	quantified	C5H11O8P1	230.019	1	Metabolite
HMDB0000619	(4R)-4-[(1S,2S,5R,7S,9R,10R,11S,14R,15R,16S)-5,9,16-trihydroxy-2,15-dimethyltetracyclo[8.7.0.0^{2,7}.0^{11,15}]heptadecan-14-yl]pentanoic acid	Cholic acid	[H][C@@]1(CC[C@@]2([H])[C@]3([H])[C@H](O)C[C@]4([H])C[C@H](O)CC[C@]4(C)[C@@]3([H])C[C@H](O)[C@]12C)[C@H](C)CCC(O)=O	quantified	C24H40O5	408.288	5	Metabolite
HMDB0000620	(2E)-pent-2-enedioic acid	Glutaconic acid	OC(=O)C\C=C\C(O)=O	quantified	C5H6O4	130.027	3	Metabolite
HMDB0000621	(3R,4R)-1,3,4,5-tetrahydroxypentan-2-one	D-Ribulose	OC[C@@H](O)[C@@H](O)C(=O)CO	detected	C5H10O5	150.053	1	Metabolite
HMDB0000622	2-ethylpropanedioic acid	Ethylmalonic acid	CCC(C(O)=O)C(O)=O	quantified	C5H8O4	132.042	2	Metabolite
HMDB0000623	dodecanedioic acid	Dodecanedioic acid	OC(=O)CCCCCCCCCCC(O)=O	quantified	C12H22O4	230.152	2	Metabolite
HMDB0000624	(2R)-2-hydroxy-4-methylpentanoic acid	D-Leucic acid	CC(C)C[C@@H](O)C(O)=O	expected	C6H12O3	132.079	1	Metabolite
HMDB0000625	(2R,3S,4R,5R)-2,3,4,5,6-pentahydroxyhexanoic acid	Gluconic acid	OC[C@@H](O)[C@@H](O)[C@H](O)[C@@H](O)C(O)=O	quantified	C6H12O7	196.058	1	Metabolite
HMDB0000626	(4R)-4-[(1S,2S,5R,7R,10R,11S,14R,15R,16S)-5,16-dihydroxy-2,15-dimethyltetracyclo[8.7.0.0^{2,7}.0^{11,15}]heptadecan-14-yl]pentanoic acid	Deoxycholic acid	[H][C@@]1(CC[C@@]2([H])[C@]3([H])CC[C@]4([H])C[C@H](O)CC[C@]4(C)[C@@]3([H])C[C@H](O)[C@]12C)[C@H](C)CCC(O)=O	quantified	C24H40O4	392.293	5	Metabolite
HMDB0000628	(1S,2R,10R,11S,14R,15S)-14-hydroxy-2,15-dimethyltetracyclo[8.7.0.0?7.0????????,?]heptadec-6-en-5-one	Epitestosterone	[H][C@@]12CC[C@@H](O)[C@@]1(C)CC[C@@]1([H])[C@@]2([H])CCC2=CC(=O)CC[C@]12C	quantified	C19H28O2	288.209	6	Metabolite
HMDB0000629	(3R,4R)-2-{[(2R,3S,4R,5R,6R)-3-acetamido-2,5-dihydroxy-6-(hydroxymethyl)oxan-4-yl]oxy}-3,4-dihydroxy-3,4-dihydro-2H-pyran-6-carboxylic acid	Chondroitin	CC(=O)N[C@@H]1[C@H](O)O[C@H](CO)[C@H](O)[C@@H]1OC1OC(=C[C@@H](O)[C@H]1O)C(O)=O	expected	C14H21N1O11	379.111	5	Metabolite
HMDB0000630	6-amino-1,2-dihydropyrimidin-2-one	Cytosine	NC1=CC=NC(=O)N1	quantified	C4H5N3O1	111.043	4	Metabolite
HMDB0000631	2-[(4R)-4-[(2S,5R,7R,14R,15R,16S)-5,16-dihydroxy-2,15-dimethyltetracyclo[8.7.0.0?7.0????????,?]heptadecan-14-yl]pentanamido]acetic acid	Deoxycholic acid glycine conjugate	[H][C@]12CCC3C4CC[C@H]([C@H](C)CCC(=O)NCC(O)=O)[C@@]4(C)[C@@H](O)CC3[C@@]1(C)CC[C@@H](O)C2	quantified	C26H43N1O5	449.314	6	Metabolite
HMDB0000632	6-({[3-acetamido-6-(hydroxymethyl)-2-methoxy-5-(sulfooxy)oxan-4-yl]oxy}methyl)-3-ethyl-4,5-dihydroxyoxane-2-carboxylic acid	Dermatan	CCC1C(O)C(O)C(COC2C(NC(C)=O)C(OC)OC(CO)C2OS(O)(=O)=O)OC1C(O)=O	expected	C18H31N1O14S1	517.147	4	Metabolite
HMDB0000633	2-amino-6-[(1R,2S)-1,2-dihydroxypropyl]-1,4-dihydropteridin-4-one	D-Biopterin	C[C@H](O)[C@H](O)C1=NC2=C(NC(N)=NC2=O)N=C1	expected	C9H11N5O3	237.086	7	Metabolite
HMDB0000634	(2Z)-2-methylbut-2-enedioic acid	Citraconic acid	C\C(=C\C(O)=O)C(O)=O	quantified	C5H6O4	130.027	3	Metabolite
HMDB0000635	4,6-dioxoheptanoic acid	Succinylacetone	CC(=O)CC(=O)CCC(O)=O	quantified	C7H10O4	158.058	3	Metabolite
HMDB0000637	2-[(4R)-4-[(2S,5R,7S,9R,14R,15R)-5,9-dihydroxy-2,15-dimethyltetracyclo[8.7.0.0?7.0????????,?]heptadecan-14-yl]pentanamido]acetic acid	Chenodeoxycholic acid glycine conjugate	[H][C@@]12C[C@H](O)CC[C@]1(C)C1CC[C@]3(C)[C@H](CCC3C1[C@H](O)C2)[C@H](C)CCC(=O)NCC(O)=O	quantified	C26H43N1O5	449.314	6	Metabolite
HMDB0000638	dodecanoic acid	Dodecanoic acid	CCCCCCCCCCCC(O)=O	quantified	C12H24O2	200.178	1	Metabolite
HMDB0000639	(2R,3S,4R,5S)-2,3,4,5-tetrahydroxyhexanedioic acid	Galactaric acid	O[C@@H]([C@@H](O)[C@H](O)C(O)=O)[C@@H](O)C(O)=O	quantified	C6H10O8	210.038	2	Metabolite
HMDB0000640	(1R,2S,3S,4R,5R)-6,8-dioxabicyclo[3.2.1]octane-2,3,4-triol	Levoglucosan	[H][C@@]12OC[C@@H](O1)[C@@H](O)[C@H](O)[C@H]2O	quantified	C6H10O5	162.053	2	Metabolite
HMDB0000641	(2S)-2-amino-4-carbamoylbutanoic acid	L-Glutamine	N[C@@H](CCC(N)=O)C(O)=O	quantified	C5H10N2O3	146.069	2	Metabolite
HMDB0000642	(2S,3R)-3-hydroxy-2-methylbutanoic acid	Erythronilic acid	C[C@@H](O)[C@H](C)C(O)=O	expected	C5H10O3	118.063	1	Metabolite
HMDB0000643	3-[9,14,19-tris(2-carboxyethyl)-5,10,15,20-tetramethyl-21,22,23,24-tetraazapentacyclo[16.2.1.1?6.18,????????.1????????,?]tetracosa-1(21),2,4,6,8(23),9,11,13,15,17,19-undecaen-4-yl]propanoic acid	Coproporphyrin I	CC1=C(CCC(O)=O)/C2=C/C3=N/C(=C\C4=C(C)C(CCC(O)=O)=C(N4)/C=C4\N=C(\C=C\1/N\2)C(CCC(O)=O)=C4C)/C(CCC(O)=O)=C3C	quantified	C36H38N4O8	654.269	20	Metabolite
HMDB0000644	3-[10,15,19-tris(2-carboxyethyl)-5,9,14,20-tetramethyl-21,22,23,24-tetraazapentacyclo[16.2.1.1?6.18,????????.1????????,?]tetracosa-1(21),2,4,6,8(23),9,11,13,15,17,19-undecaen-4-yl]propanoic acid	Coproporphyrin IV	CC1=C(CCC(O)=O)/C2=C/C3=N/C(=C\C4=C(CCC(O)=O)C(C)=C(N4)/C=C4\N=C(\C=C\1/N\2)C(C)=C4CCC(O)=O)/C(CCC(O)=O)=C3C	expected	C36H38N4O8	654.269	20	Metabolite
HMDB0000645	{[(3R,4S,5S,6R)-3,4,5-trihydroxy-6-(hydroxymethyl)oxan-2-yl]oxy}phosphonic acid	Galactose 1-phosphate	OC[C@H]1O[C@H](OP(O)(O)=O)[C@H](O)[C@@H](O)[C@H]1O	quantified	C6H13O9P1	260.03	1	Metabolite
HMDB0000646	(3R,4S,5S)-oxane-2,3,4,5-tetrol	L-Arabinose	O[C@H]1COC(O)[C@H](O)[C@H]1O	quantified	C5H10O5	150.053	1	Metabolite
HMDB0000648	(2R,3R,4S,5R,6R)-2-{[(4E)-2-amino-3-hydroxyoctadec-4-en-1-yl]oxy}-6-(hydroxymethyl)oxane-3,4,5-triol	Galactosylsphingosine	CCCCCCCCCCCCC\C=C\[C@@H](O)[C@@H](N)CO[C@@H]1O[C@H](CO)[C@H](O)[C@H](O)[C@H]1O	expected	C24H47N1O7	461.335	2	Metabolite
HMDB0000649	(1S,2R,5S,10S,11S,14R,15R)-14-[(2R,5S)-5-ethyl-6-methylheptan-2-yl]-2,15-dimethyltetracyclo[8.7.0.0?7.0????????,?]heptadec-7-en-5-ol	Clionasterol	[H][C@@]12CC[C@H]([C@H](C)CC[C@H](CC)C(C)C)[C@@]1(C)CC[C@@]1([H])[C@@]2([H])CC=C2C[C@@H](O)CC[C@]12C	expected	C29H50O1	414.386	5	Metabolite
HMDB0000650	(2R)-2-aminobutanoic acid	D-alpha-Aminobutyric acid	CC[C@@H](N)C(O)=O	quantified	C4H9N1O2	103.063	1	Metabolite
HMDB0000651	3-(decanoyloxy)-4-(trimethylazaniumyl)butanoate	Decanoylcarnitine	CCCCCCCCCC(=O)OC(CC([O-])=O)C[N+](C)(C)C	quantified	C17H33N1O4	315.241	2	Metabolite
HMDB0000652	6-{[3-acetamido-2-hydroxy-6-(hydroxymethyl)-5-(sulfooxy)oxan-4-yl]oxy}-3,4,5-trihydroxyoxane-2-carboxylic acid	Chondroitin 4-sulfate	CC(=O)NC1C(O)OC(CO)C(OS(O)(=O)=O)C1OC1OC(C(O)C(O)C1O)C(O)=O	expected	C14H23N1O15S1	477.079	4	Metabolite
HMDB0000653	[(1S,2R,5S,10S,11S,14R,15R)-2,15-dimethyl-14-[(2R)-6-methylheptan-2-yl]tetracyclo[8.7.0.0?7.0????????,?]heptadec-7-en-5-yl]oxidanesulfonic acid	Cholesterol sulfate	[H][C@@]12CC[C@H]([C@H](C)CCCC(C)C)[C@@]1(C)CC[C@@]1([H])[C@@]2([H])CC=C2C[C@H](CC[C@]12C)OS(O)(=O)=O	quantified	C27H46O4S1	466.312	5	Metabolite
HMDB0000656	(2S)-2-amino-4-{[(1R)-2-[(2-amino-2-carboxyethyl)disulfanyl]-1-[(carboxymethyl)carbamoyl]ethyl]carbamoyl}butanoic acid	Cysteineglutathione disulfide	N[C@@H](CCC(=O)N[C@@H](CSSCC(N)C(O)=O)C(=O)NCC(O)=O)C(O)=O	quantified	C13H22N4O8S2	426.088	5	Metabolite
HMDB0000657	copper(2+) ion	Copper	[Cu++]	quantified	Cu1H-2	60.9139	2	Adduct
HMDB0000658	(1S,2R,5S,10S,11S,14R,15R)-2,15-dimethyl-14-[(2R)-6-methylheptan-2-yl]tetracyclo[8.7.0.0^{2,7}.0^{11,15}]heptadec-7-en-5-yl (9Z)-hexadec-9-enoate	CE(16:1(9Z))	[H][C@@]1(CC[C@@]2([H])[C@]3([H])CC=C4C[C@H](CC[C@]4(C)[C@@]3([H])CC[C@]12C)OC(=O)CCCCCCC\C=C/CCCCCC)[C@H](C)CCCC(C)C	quantified	C43H74O2	622.569	7	Metabolite
HMDB0000659	(4R)-4-[(1S,2S,5R,7R,10R,11S,14R,15R,16S)-2,15-dimethyl-5,16-bis(sulfooxy)tetracyclo[8.7.0.0?7.0????????,?]heptadecan-14-yl]pentanoic acid	Deoxycholic acid disulfate	[H][C@@]12CC[C@H]([C@H](C)CCC(O)=O)[C@@]1(C)[C@H](C[C@@]1([H])[C@@]2([H])CC[C@]2([H])C[C@@H](CC[C@]12C)OS(O)(=O)=O)OS(O)(=O)=O	expected	C24H40O10S2	552.206	5	Metabolite
HMDB0000660	(3S,4S,5R)-1,3,4,5,6-pentahydroxyhexan-2-one	D-Fructose	OC[C@H]1O[C@](O)(CO)[C@@H](O)[C@@H]1O	quantified	C6H12O6	180.063	1	Metabolite
HMDB0000661	pentanedioic acid	Glutaric acid	OC(=O)CCCC(O)=O	quantified	C5H8O4	132.042	2	Metabolite
HMDB0000663	(2R,3S,4S,5S)-2,3,4,5-tetrahydroxyhexanedioic acid	Glucaric acid	O[C@@H]([C@H](O)[C@@H](O)C(O)=O)[C@H](O)C(O)=O	quantified	C6H10O8	210.038	2	Metabolite
HMDB0000664	(4R)-4-[(1S,2R,5S,7R,8S,10S,11S,14R,15R)-5,8-dihydroxy-2,15-dimethyltetracyclo[8.7.0.0?7.0????????,?]heptadecan-14-yl]pentanoic acid	Isohyodeoxycholic acid	[H][C@@]12CC[C@H]([C@H](C)CCC(O)=O)[C@@]1(C)CC[C@@]1([H])[C@@]2([H])C[C@H](O)[C@]2([H])C[C@@H](O)CC[C@]12C	expected	C24H40O4	392.293	5	Metabolite
HMDB0000665	2-hydroxy-4-methylpentanoic acid	Leucinic acid	CC(C)CC(O)C(O)=O	quantified	C6H12O3	132.079	1	Metabolite
HMDB0000666	heptanoic acid	Heptanoic acid	CCCCCCC(O)=O	quantified	C7H14O2	130.099	1	Metabolite
HMDB0000667	(2S)-2-amino-3-[4-(4-hydroxyphenoxy)phenyl]propanoic acid	L-Thyronine	N[C@@H](CC1=CC=C(OC2=CC=C(O)C=C2)C=C1)C(O)=O	quantified	C15H15N1O4	273.1	9	Metabolite
HMDB0000668	3-[20-(2-carboxyethyl)-10,15-bis(1-hydroxyethyl)-5,9,14,19-tetramethyl-21,22,23,24-tetraazapentacyclo[16.2.1.1?6.18,????????.1????????,?]tetracosa-1(21),2,4,6,8,10,12,14,16(22),17,19-undecaen-4-yl]propanoic acid	Hematoporphyrin IX	CC(O)C1=C2NC(\C=C3/N\C(=C/C4=N/C(=C\C5=N\C(=C/2)\C(C)=C5C(C)O)/C(C)=C4CCC(O)=O)C(CCC(O)=O)=C3C)=C1C	expected	C34H38N4O6	598.279	18	Metabolite
HMDB0000669	2-(2-hydroxyphenyl)acetic acid	Ortho-Hydroxyphenylacetic acid	OC(=O)CC1=CC=CC=C1O	quantified	C8H8O3	152.047	5	Metabolite
HMDB0000670	(2S)-2-amino-6-carbamimidamidohexanoic acid	Homo-L-arginine	N[C@@H](CCCCNC(N)=N)C(O)=O	quantified	C7H16N4O2	188.127	2	Metabolite
HMDB0000671	2-hydroxy-3-(1H-indol-3-yl)propanoic acid	Indolelactic acid	OC(CC1=CNC2=C1C=CC=C2)C(O)=O	quantified	C11H11N1O3	205.074	7	Metabolite
HMDB0000672	hexadecanedioic acid	Hexadecanedioic acid	OC(=O)CCCCCCCCCCCCCCC(O)=O	quantified	C16H30O4	286.214	2	Metabolite
HMDB0000673	(9Z,12Z)-octadeca-9,12-dienoic acid	Linoleic acid	CCCCC\C=C/C\C=C/CCCCCCCC(O)=O	quantified	C18H32O2	280.24	3	Metabolite
HMDB0000674	[(2R)-2,3-bis(hexadecanoyloxy)propoxy]phosphonic acid	PA(16:0/16:0)	[H][C@@](COC(=O)CCCCCCCCCCCCCCC)(COP(O)(O)=O)OC(=O)CCCCCCCCCCCCCCC	quantified	C35H69O8P1	648.473	2	Metabolite
HMDB0000675	diiodane	Iodine	II	quantified	I2	253.809	0	Adduct
HMDB0000676	2-amino-4-{[(3S)-3-amino-3-carboxypropyl]disulfanyl}butanoic acid	L-Homocystine	NC(CCSSCC[C@H](N)C(O)=O)C(O)=O	quantified	C8H16N2O4S2	268.055	2	Metabolite
HMDB0000678	2-(3-methylbutanamido)acetic acid	Isovalerylglycine	CC(C)CC(=O)NCC(O)=O	quantified	C7H13N1O3	159.09	2	Metabolite
HMDB0000679	(2S)-2-amino-6-(carbamoylamino)hexanoic acid	Homocitrulline	N[C@@H](CCCCNC(N)=O)C(O)=O	quantified	C7H15N3O3	189.111	2	Metabolite
HMDB0000682	1H-indol-3-yloxidanesulfonic acid	Indoxyl sulfate	OS(=O)(=O)OC1=CNC2=CC=CC=C12	quantified	C8H7N1O4S1	213.01	6	Metabolite
HMDB0000683	3-[9,20-bis(2-carboxyethyl)-14-ethenyl-5,10,15,19-tetramethyl-21,22,23,24-tetraazapentacyclo[16.2.1.1?6.18,????????.1????????,?]tetracosa-1,3,5,7,9,11(23),12,14,16,18(21),19-undecaen-4-yl]propanoic acid	Harderoporphyrin	CC1=C2NC(\C=C3/N=C(/C=C4\N\C(=C/C5=N/C(=C\2)/C(CCC(O)=O)=C5C)C(C=C)=C4C)C(C)=C3CCC(O)=O)=C1CCC(O)=O	expected	C35H36N4O6	608.263	20	Metabolite
HMDB0000684	(2S)-2-amino-4-(2-aminophenyl)-4-oxobutanoic acid	L-Kynurenine	N[C@@H](CC(=O)C1=CC=CC=C1N)C(O)=O	quantified	C10H12N2O3	208.085	6	Metabolite
HMDB0000686	(4R)-4-[(1S,2S,5S,7S,9S,10R,11S,14R,15R)-5,9-dihydroxy-2,15-dimethyltetracyclo[8.7.0.0?7.0????????,?]heptadecan-14-yl]pentanoic acid	Isoursodeoxycholic acid	[H][C@@]12CC[C@H]([C@H](C)CCC(O)=O)[C@@]1(C)CC[C@@]1([H])[C@@]2([H])[C@@H](O)C[C@]2([H])C[C@@H](O)CC[C@]12C	quantified	C24H40O4	392.293	5	Metabolite
HMDB0000687	(2S)-2-amino-4-methylpentanoic acid	L-Leucine	CC(C)C[C@H](N)C(O)=O	quantified	C6H13N1O2	131.095	1	Metabolite
HMDB0000688	3-[(3-methylbutanoyl)oxy]-4-(trimethylazaniumyl)butanoate	Isovalerylcarnitine	CC(C)CC(=O)OC(CC([O-])=O)C[N+](C)(C)C	quantified	C12H23N1O4	245.163	2	Metabolite
HMDB0000689	4-methylpentanoic acid	Isocaproic acid	CC(C)CCC(O)=O	quantified	C6H12O2	116.084	1	Metabolite
HMDB0000691	propanedioic acid	Malonic acid	OC(=O)CC(O)=O	quantified	C3H4O4	104.011	2	Metabolite
HMDB0000692	<U+03BB>?iron(2+) ion	Fe2+	[Fe++]	quantified	Fe1H-2	53.9193	2	Adduct
HMDB0000693	(2S,3R,4R,5S,6R)-4-hydroxy-6-{[(2S,3R,4S,5S,6R)-4-hydroxy-6-methoxy-5-[(sulfooxy)amino]-2-[(sulfooxy)methyl]oxan-3-yl]oxy}-3-methoxy-5-(sulfooxy)oxane-2-carboxylic acid	Heparan sulfate	CO[C@@H]1O[C@@H](COS(O)(=O)=O)[C@H](O[C@@H]2O[C@@H]([C@H](OC)[C@@H](O)[C@@H]2OS(O)(=O)=O)C(O)=O)[C@@H](O)[C@@H]1NOS(O)(=O)=O	quantified	C14H25N1O21S3	639.008	3	Metabolite
HMDB0000694	(2S)-2-hydroxypentanedioic acid	L-2-Hydroxyglutaric acid	O[C@@H](CCC(O)=O)C(O)=O	quantified	C5H8O5	148.037	2	Metabolite
HMDB0000695	4-methyl-2-oxopentanoic acid	Ketoleucine	CC(C)CC(=O)C(O)=O	quantified	C6H10O3	130.063	2	Metabolite
HMDB0000696	(2S)-2-amino-4-(methylsulfanyl)butanoic acid	L-Methionine	CSCC[C@H](N)C(O)=O	quantified	C5H11N1O2S1	149.051	1	Metabolite
HMDB0000697	3-[15,20-bis(2-carboxyethyl)-19-(carboxymethyl)-10-ethyl-5,9,14-trimethyl-21,22,23,24-tetraazapentacyclo[16.2.1.1?6.18,????????.1????????,?]tetracosa-1(20),2,4,6(24),7,9,11,13(22),14,16,18-undecaen-4-yl]propanoic acid	Isocoproporphyrin	CCC1=C(C)/C2=C/C3=N/C(=C\C4=C(CCC(O)=O)C(CC(O)=O)=C(N4)/C=C4\N=C(\C=C\1/N\2)C(C)=C4CCC(O)=O)/C(CCC(O)=O)=C3C	expected	C36H38N4O8	654.269	20	Metabolite
HMDB0000698	2-[(4R)-4-[(1S,2S,5R,7R,10R,11S,14R,15R)-5-hydroxy-2,15-dimethyltetracyclo[8.7.0.0?7.0????????,?]heptadecan-14-yl]pentanamido]acetic acid	Lithocholic acid glycine conjugate	[H][C@@]1(CC[C@@]2([H])[C@]3([H])CC[C@]4([H])C[C@H](O)CC[C@]4(C)[C@@]3([H])CC[C@]12C)[C@H](C)CCC(=O)NCC(O)=O	quantified	C26H43N1O4	433.319	6	Metabolite
HMDB0000699	3-carbamoyl-1-methylpyridin-1-ium	1-Methylnicotinamide	C[N+]1=CC=CC(=C1)C(N)=O	quantified	C7H8N2O1	136.064	5	Metabolite
HMDB0000700	3-hydroxypropanoic acid	Hydroxypropionic acid	OCCC(O)=O	quantified	C3H6O3	90.0317	1	Metabolite
HMDB0000701	2-hexanamidoacetic acid	Hexanoylglycine	CCCCCC(=O)NCC(O)=O	quantified	C8H15N1O3	173.105	2	Metabolite
HMDB0000703	(2S)-2-hydroxy-2-phenylacetic acid	Mandelic acid	O[C@H](C(O)=O)C1=CC=CC=C1	quantified	C8H8O3	152.047	5	Metabolite
HMDB0000704	2-amino-1,4,7,8-tetrahydropteridine-4,7-dione	Isoxanthopterin	NC1=NC(=O)C2=C(N1)NC(=O)C=N2	detected	C6H5N5O2	179.044	7	Metabolite
HMDB0000705	3-(hexanoyloxy)-4-(trimethylazaniumyl)butanoate	Hexanoylcarnitine	CCCCCC(=O)OC(CC([O-])=O)C[N+](C)(C)C	quantified	C13H25N1O4	259.178	2	Metabolite
HMDB0000706	(3S)-3-amino-3-{[(1S)-1-carboxy-2-phenylethyl]carbamoyl}propanoic acid	Aspartylphenylalanine	N[C@@H](CC(O)=O)C(=O)N[C@@H](CC1=CC=CC=C1)C(O)=O	quantified	C13H16N2O5	280.106	7	Metabolite
HMDB0000707	3-(4-hydroxyphenyl)-2-oxopropanoic acid	4-Hydroxyphenylpyruvic acid	OC(=O)C(=O)CC1=CC=C(O)C=C1	quantified	C9H8O4	180.042	6	Metabolite
HMDB0000708	2-[(4R)-4-[(1S,2S,5R,7S,9S,10R,11S,14R,15R)-5,9-dihydroxy-2,15-dimethyltetracyclo[8.7.0.0?7.0????????,?]heptadecan-14-yl]pentanamido]acetic acid	Glycoursodeoxycholic acid	[H][C@@]1(CC[C@@]2([H])[C@]3([H])[C@@H](O)C[C@]4([H])C[C@H](O)CC[C@]4(C)[C@@]3([H])CC[C@]12C)[C@H](C)CCC(=O)NCC(O)=O	quantified	C26H43N1O5	449.314	6	Metabolite
HMDB0000709	(2R)-2-amino-3-({2-amino-2-[(carboxymethyl)carbamoyl]ethyl}disulfanyl)propanoic acid	L-Cysteinylglycine disulfide	N[C@@H](CSSCC(N)C(=O)NCC(O)=O)C(O)=O	quantified	C8H15N3O5S2	297.045	3	Metabolite
HMDB0000710	4-hydroxybutanoic acid	4-Hydroxybutyric acid	OCCCC(O)=O	quantified	C4H8O3	104.047	1	Metabolite
HMDB0000711	2-hydroxyoctanoic acid	Hydroxyoctanoic acid	CCCCCCC(O)C(O)=O	detected	C8H16O3	160.11	1	Metabolite
HMDB0000712	3-[(15-carboxypentadecanoyl)oxy]-4-(trimethylazaniumyl)butanoate	Hexadecanedioic acid mono-L-carnitine ester	C[N+](C)(C)CC(CC([O-])=O)OC(=O)CCCCCCCCCCCCCCC(O)=O	detected	C23H43N1O6	429.309	3	Metabolite
HMDB0000713	(4R)-4-[(1S,2S,5S,7S,10R,11S,14R,15R)-5-hydroxy-2,15-dimethyltetracyclo[8.7.0.0?7.0????????,?]heptadecan-14-yl]pentanoic acid	Isoallolithocholic acid	[H][C@@]12CC[C@H]([C@H](C)CCC(O)=O)[C@@]1(C)CC[C@@]1([H])[C@@]2([H])CC[C@@]2([H])C[C@@H](O)CC[C@]12C	expected	C24H40O3	376.298	5	Metabolite
HMDB0000714	2-(phenylformamido)acetic acid	Hippuric acid	OC(=O)CNC(=O)C1=CC=CC=C1	quantified	C9H9N1O3	179.058	6	Metabolite
HMDB0000715	4-oxo-1,4-dihydroquinoline-2-carboxylic acid	Kynurenic acid	OC(=O)C1=CC(=O)C2=CC=CC=C2N1	quantified	C10H7N1O3	189.043	8	Metabolite
HMDB0000716	(2S)-piperidine-2-carboxylic acid	L-Pipecolic acid	OC(=O)[C@@H]1CCCCN1	quantified	C6H11N1O2	129.079	2	Metabolite
HMDB0000717	(4R)-4-[(1S,2S,5S,7R,10R,11S,14R,15R)-5-hydroxy-2,15-dimethyltetracyclo[8.7.0.0?7.0????????,?]heptadecan-14-yl]pentanoic acid	Isolithocholic acid	[H][C@@]12CC[C@H]([C@H](C)CCC(O)=O)[C@@]1(C)CC[C@@]1([H])[C@@]2([H])CC[C@]2([H])C[C@@H](O)CC[C@]12C	detected	C24H40O3	376.298	5	Metabolite
HMDB0000718	3-methylbutanoic acid	Isovaleric acid	CC(C)CC(O)=O	quantified	C5H10O2	102.068	1	Metabolite
HMDB0000719	(2S)-2-amino-4-hydroxybutanoic acid	L-Homoserine	N[C@@H](CCO)C(O)=O	quantified	C4H9N1O3	119.058	1	Metabolite
HMDB0000720	4-oxopentanoic acid	Levulinic acid	CC(=O)CCC(O)=O	quantified	C5H8O3	116.047	2	Metabolite
HMDB0000721	1-(2-aminoacetyl)pyrrolidine-2-carboxylic acid	Glycylproline	NCC(=O)N1CCCC1C(O)=O	quantified	C7H12N2O3	172.085	3	Metabolite
HMDB0000722	2-[(4R)-4-[(2S,5R,15R)-5-hydroxy-2,15-dimethyltetracyclo[8.7.0.0?7.0????????,?]heptadecan-14-yl]pentanamido]ethane-1-sulfonic acid	Lithocholyltaurine	C[C@H](CCC(=O)NCCS(O)(=O)=O)C1CCC2C3CCC4C[C@H](O)CC[C@]4(C)C3CC[C@]12C	quantified	C26H45N1O5S1	483.302	5	Metabolite
HMDB0000725	(2S,4R)-4-hydroxypyrrolidine-2-carboxylic acid	4-Hydroxyproline	O[C@H]1CN[C@@H](C1)C(O)=O	quantified	C5H9N1O3	131.058	2	Metabolite
HMDB0000726	(2S)-2-(3-methylbutanamido)pentanedioic acid	Isovalerylglutamic acid	CC(C)CC(=O)N[C@@H](CCC(O)=O)C(O)=O	expected	C10H17N1O5	231.111	3	Metabolite
HMDB0000727	2-amino-6-[(1S,2S)-1,2,3-trihydroxypropyl]-1,4-dihydropteridin-4-one	L-Threoneopterin	NC1=NC(=O)C2=C(N1)N=CC(=N2)[C@H](O)[C@@H](O)CO	expected	C9H11N5O4	253.081	7	Metabolite
HMDB0000728	3-[10,15,20-tris(2-carboxyethyl)-9,14,19-tris(carboxymethyl)-5-methyl-21,22,23,24-tetraazapentacyclo[16.2.1.1?6.18,????????.1????????,?]tetracosa-1,3(24),4,6,8,10,12,14,16(22),17,19-undecaen-4-yl]propanoic acid	Hydroxypropionic porphyrin III	CC1=C(CCC(O)=O)C2=N\C\1=C/C1=C(CC(O)=O)C(CCC(O)=O)=C(N1)\C=C1/N=C(/C=C3\N/C(=C\2)C(CCC(O)=O)=C3CC(O)=O)C(CCC(O)=O)=C1CC(O)=O	expected	C39H38N4O14	786.238	23	Metabolite
HMDB0000729	2-hydroxy-2-methylpropanoic acid	Alpha-Hydroxyisobutyric acid	CC(C)(O)C(O)=O	quantified	C4H8O3	104.047	1	Metabolite
HMDB0000730	2-(2-methylpropanamido)acetic acid	Isobutyrylglycine	CC(C)C(=O)NCC(O)=O	quantified	C6H11N1O3	145.074	2	Metabolite
HMDB0000731	(2R)-2-amino-3-(sulfosulfanyl)propanoic acid	Cysteine-S-sulfate	N[C@@H](CSS(O)(=O)=O)C(O)=O	quantified	C3H7N1O5S2	200.977	1	Metabolite
HMDB0000732	2-amino-4-(2-amino-3-hydroxyphenyl)-4-oxobutanoic acid	Hydroxykynurenine	NC(CC(=O)C1=C(N)C(O)=CC=C1)C(O)=O	quantified	C10H12N2O4	224.08	6	Metabolite
HMDB0000733	(4R)-4-[(1S,2R,5R,8S,10S,11S,14R,15R)-5,8-dihydroxy-2,15-dimethyltetracyclo[8.7.0.0?7.0????????,?]heptadecan-14-yl]pentanoic acid	Hyodeoxycholic acid	[H][C@@]12CC[C@H]([C@H](C)CCC(O)=O)[C@@]1(C)CC[C@@]1([H])[C@@]2([H])C[C@H](O)C2C[C@H](O)CC[C@]12C	quantified	C24H40O4	392.293	5	Metabolite
HMDB0000734	(2E)-3-(1H-indol-2-yl)prop-2-enoic acid	Indoleacrylic acid	OC(=O)\C=C\C1=CC2=C(N1)C=CC=C2	detected	C11H9N1O2	187.063	8	Metabolite
HMDB0000735	2-[2-(4-hydroxyphenyl)acetamido]acetic acid	Hydroxyphenylacetylglycine	OC(=O)CNC(=O)CC1=CC=C(O)C=C1	quantified	C10H11N1O4	209.069	6	Metabolite
HMDB0000736	(3R)-3-[(2-methylpropanoyl)oxy]-4-(trimethylazaniumyl)butanoate	Isobutyryl-L-carnitine	CC(C)C(=O)O[C@H](CC([O-])=O)C[N+](C)(C)C	quantified	C11H21N1O4	231.147	2	Metabolite
HMDB0000737	3-[9,14,19-tris(2-carboxyethyl)-10,15,20-tris(carboxymethyl)-5-methyl-21,22,23,24-tetraazapentacyclo[16.2.1.1?6.18,????????.1????????,?]tetracosa-1(20),2,4,6(24),7,9,11,13(22),14,16,18-undecaen-4-yl]propanoic acid	Heptacarboxylporphyrin I	CC1=C(CCC(O)=O)\C2=C\C3=C(CC(O)=O)C(CCC(O)=O)=C(N3)\C=C3/N=C(/C=C4\N\C(=C/C1=N2)C(CCC(O)=O)=C4CC(O)=O)C(CCC(O)=O)=C3CC(O)=O	quantified	C39H38N4O14	786.238	23	Metabolite
HMDB0000738	1H-indole	Indole	N1C=CC2=C1C=CC=C2	quantified	C8H7N1	117.058	6	Metabolite
HMDB0000739	3,5-bis(3-amino-3-carboxypropyl)-2-(4-amino-4-carboxybutyl)-1-(5-amino-5-carboxypentyl)pyridin-1-ium	Isodesmosine	NC(CCCC[N+]1=CC(CCC(N)C(O)=O)=CC(CCC(N)C(O)=O)=C1CCCC(N)C(O)=O)C(O)=O	quantified	C24H39N5O8	525.28	8	Metabolite
HMDB0000740	(2S,3R,4S,5R,6R)-2-{[(2R,3S,4S,5R)-4,5-dihydroxy-2,5-bis(hydroxymethyl)oxolan-3-yl]oxy}-6-(hydroxymethyl)oxane-3,4,5-triol	Lactulose	OC[C@H]1O[C@](O)(CO)[C@@H](O)[C@@H]1O[C@@H]1O[C@H](CO)[C@H](O)[C@H](O)[C@H]1O	quantified	C12H22O11	342.116	2	Metabolite
HMDB0000742	2-amino-4-sulfanylbutanoic acid	Homocysteine	NC(CCS)C(O)=O	quantified	C4H9N1O2S1	135.035	1	Metabolite
HMDB0000743	3-[9,14,19-tris(2-carboxyethyl)-15,20-bis(carboxymethyl)-5,10-dimethyl-21,22,23,24-tetraazapentacyclo[16.2.1.1?6.18,????????.1????????,?]tetracosa-1(21),2,4,6,8(23),9,11,13,15,17,19-undecaen-4-yl]propanoic acid	Hexacarboxylporphyrin I	CC1=C(CCC(O)=O)/C2=C/C3=N/C(=C\C4=C(CC(O)=O)C(CCC(O)=O)=C(N4)/C=C4\N=C(\C=C\1/N\2)C(CCC(O)=O)=C4C)/C(CCC(O)=O)=C3CC(O)=O	expected	C38H38N4O12	742.249	22	Metabolite
HMDB0000744	2-hydroxybutanedioic acid	Malic acid	OC(CC(O)=O)C(O)=O	quantified	C4H6O5	134.022	2	Metabolite
HMDB0000745	(2S)-2-(4-aminobutanamido)-3-(1H-imidazol-4-yl)propanoic acid	Homocarnosine	NCCCC(=O)N[C@@H](CC1=CNC=N1)C(O)=O	quantified	C10H16N4O3	240.122	5	Metabolite
HMDB0000746	(2S)-2-hydroxy-4-methylpentanoic acid	Hydroxyisocaproic acid	CC(C)C[C@H](O)C(O)=O	quantified	C6H12O3	132.079	1	Metabolite
HMDB0000747	(2S)-2-(3-methylbutanamido)propanoic acid	Isovalerylalanine	CC(C)CC(=O)N[C@@H](C)C(O)=O	expected	C8H15N1O3	173.105	2	Metabolite
HMDB0000748	(2R)-2-hydroxy-3-phenylpropanoic acid	L-3-Phenyllactic acid	O[C@H](CC1=CC=CC=C1)C(O)=O	quantified	C9H10O3	166.063	5	Metabolite
HMDB0000749	(2Z)-2-methylbut-2-enedioic acid	Mesaconic acid	C\C(=C/C(O)=O)C(O)=O	expected	C5H6O4	130.027	3	Metabolite
HMDB0000750	2-hydroxy-2-(3-hydroxyphenyl)acetic acid	3-Hydroxymandelic acid	OC(C(O)=O)C1=CC(O)=CC=C1	quantified	C8H8O4	168.042	5	Metabolite
HMDB0000751	(3R,4S)-1,3,4,5-tetrahydroxypentan-2-one	L-Threo-2-pentulose	OC[C@H](O)[C@@H](O)C(=O)CO	quantified	C5H10O5	150.053	1	Metabolite
HMDB0000752	3-methylpentanedioic acid	Methylglutaric acid	CC(CC(O)=O)CC(O)=O	quantified	C6H10O4	146.058	2	Metabolite
HMDB0000753	hexan-3-one	3-Hexanone	CCCC(=O)CC	detected	C6H12O1	100.089	1	Metabolite
HMDB0000754	3-hydroxy-3-methylbutanoic acid	3-Hydroxyisovaleric acid	CC(C)(O)CC(O)=O	quantified	C5H10O3	118.063	1	Metabolite
HMDB0000755	2-hydroxy-3-(4-hydroxyphenyl)propanoic acid	Hydroxyphenyllactic acid	OC(CC1=CC=C(O)C=C1)C(O)=O	quantified	C9H10O4	182.058	5	Metabolite
HMDB0000756	(3R)-3-(hexanoyloxy)-4-(trimethylazaniumyl)butanoate	L-Hexanoylcarnitine	CCCCCC(=O)O[C@H](CC([O-])=O)C[N+](C)(C)C	quantified	C13H25N1O4	259.178	2	Metabolite
HMDB0000757	(2S,3R,4S,5S,6R)-2-{[(2R,3S,4R,5R,6R)-4,5-dihydroxy-6-{[(2R,3S,4R,5R,6S)-4,5,6-trihydroxy-2-(hydroxymethyl)oxan-3-yl]oxy}-3-{[(2R,3R,4S,5S,6R)-3,4,5-trihydroxy-6-(hydroxymethyl)oxan-2-yl]oxy}oxan-2-yl]methoxy}-6-(hydroxymethyl)oxane-3,4,5-triol	Glycogen	OC[C@H]1O[C@H](OC[C@H]2O[C@H](O[C@H]3[C@H](O)[C@@H](O)[C@@H](O)O[C@@H]3CO)[C@H](O)[C@@H](O)[C@@H]2O[C@H]2O[C@H](CO)[C@@H](O)[C@H](O)[C@H]2O)[C@H](O)[C@@H](O)[C@@H]1O	quantified	C24H42O21	666.222	4	Metabolite
HMDB0000759	(2S)-2-(2-aminoacetamido)-4-methylpentanoic acid	Glycylleucine	CC(C)C[C@H](NC(=O)CN)C(O)=O	quantified	C8H16N2O3	188.116	2	Metabolite
HMDB0000760	(4R)-4-[(1S,2R,5R,7R,8R,9S,10S,11S,15R)-5,8,9-trihydroxy-2,15-dimethyltetracyclo[8.7.0.0?7.0????????,?]heptadecan-14-yl]pentanoic acid	Hyocholic acid	[H][C@@]12CCC([C@H](C)CCC(O)=O)[C@@]1(C)CC[C@@]1([H])[C@@]2([H])[C@H](O)[C@H](O)[C@]2([H])C[C@H](O)CC[C@]12C	quantified	C24H40O5	408.288	5	Metabolite
HMDB0000761	(4R)-4-[(1S,2S,5R,7R,10R,11S,14R,15R)-5-hydroxy-2,15-dimethyltetracyclo[8.7.0.0^{2,7}.0^{11,15}]heptadecan-14-yl]pentanoic acid	Lithocholic acid	[H][C@@]1(CC[C@@]2([H])[C@]3([H])CC[C@]4([H])C[C@H](O)CC[C@]4(C)[C@@]3([H])CC[C@]12C)[C@H](C)CCC(O)=O	quantified	C24H40O3	376.298	5	Metabolite
HMDB0000763	2-(5-hydroxy-1H-indol-3-yl)acetic acid	5-Hydroxyindoleacetic acid	OC(=O)CC1=CNC2=CC=C(O)C=C12	quantified	C10H9N1O3	191.058	7	Metabolite
HMDB0000764	3-phenylpropanoic acid	Hydrocinnamic acid	OC(=O)CCC1=CC=CC=C1	quantified	C9H10O2	150.068	5	Metabolite
HMDB0000765	(2R,3R,4R,5R)-hexane-1,2,3,4,5,6-hexol	Mannitol	OC[C@@H](O)[C@@H](O)[C@H](O)[C@H](O)CO	quantified	C6H14O6	182.079	0	Metabolite
HMDB0000766	(2S)-2-acetamidopropanoic acid	N-Acetyl-L-alanine	C[C@H](NC(C)=O)C(O)=O	quantified	C5H9N1O3	131.058	2	Metabolite
HMDB0000767	5-[(2S,3R,4S,5R)-3,4-dihydroxy-5-(hydroxymethyl)oxolan-2-yl]-1,2,3,4-tetrahydropyrimidine-2,4-dione	Pseudouridine	OC[C@H]1O[C@H]([C@H](O)[C@@H]1O)C1=CNC(=O)NC1=O	quantified	C9H12N2O6	244.07	5	Metabolite
HMDB0000768	(2S,4S,5R,6R)-6-[(1R,2R)-1,2-dihydroxy-3-[(2-hydroxypropanoyl)oxy]propyl]-5-acetamido-2,4-dihydroxyoxane-2-carboxylic acid	N-Acetyl-9-O-lactoylneuraminic acid	CC(O)C(=O)OC[C@@H](O)[C@@H](O)[C@@H]1O[C@@](O)(C[C@H](O)[C@H]1NC(C)=O)C(O)=O	expected	C14H23N1O11	381.127	4	Metabolite
HMDB0000770	N-[(2S,3S)-3-hydroxy-1-{[(2R,3R,4S,5S,6R)-3,4,5-trihydroxy-6-(hydroxymethyl)oxan-2-yl]oxy}nonadecan-2-yl]octadecanamide	N-Glycoloylganglioside GM2	CCCCCCCCCCCCCCCCCC(=O)N[C@@H](CO[C@@H]1O[C@H](CO)[C@@H](O)[C@H](O)[C@H]1O)[C@@H](O)CCCCCCCCCCCCCCCC	expected	C43H85N1O8	743.628	2	Metabolite
HMDB0000772	nonadecanoic acid	Nonadecanoic acid	CCCCCCCCCCCCCCCCCCC(O)=O	detected	C19H38O2	298.287	1	Metabolite
HMDB0000773	(2R,4S,5R,6R)-5-acetamido-2,4-dihydroxy-6-[(1R,2R)-1,2,3-trihydroxypropyl]oxane-2-carboxylic acid	N-Acetyl-a-neuraminic acid	[H][C@]1(O[C@](O)(C[C@H](O)[C@H]1NC(C)=O)C(O)=O)[C@H](O)[C@H](O)CO	expected	C11H19N1O9	309.106	3	Metabolite
HMDB0000774	[(1S,2R,10S,11S,14S,15S)-14-acetyl-2,15-dimethyltetracyclo[8.7.0.0?7.0????????,?]heptadec-7-en-5-yl]oxidanesulfonic acid	Pregnenolone sulfate	[H][C@@]12CC[C@H](C(C)=O)[C@@]1(C)CC[C@@]1([H])[C@@]2([H])CC=C2CC(CC[C@]12C)OS(O)(=O)=O	quantified	C21H32O5S1	396.197	6	Metabolite
HMDB0000779	2-hydroxy-3-phenylpropanoic acid	Phenyllactic acid	OC(CC1=CC=CC=C1)C(O)=O	quantified	C9H10O3	166.063	5	Metabolite
HMDB0000780	3-[10,14,19-tris(2-carboxyethyl)-15,20-bis(carboxymethyl)-5,9-dimethyl-21,22,23,24-tetraazapentacyclo[16.2.1.1?6.18,????????.1????????,?]tetracosa-1,3,5,7,9,11(23),12,14,16,18(21),19-undecaen-4-yl]propanoic acid	Porphinehexacarboxylic acid	CC1=C2NC(\C=C3/N=C(/C=C4\N\C(=C/C5=N/C(=C\2)/C(C)=C5CCC(O)=O)C(CCC(O)=O)=C4CC(O)=O)C(CCC(O)=O)=C3CC(O)=O)=C1CCC(O)=O	expected	C38H38N4O12	742.249	22	Metabolite
HMDB0000781	[(2R,3R,4R,5R,6R)-5-acetamido-4,6-dihydroxy-2-(hydroxymethyl)oxan-3-yl]oxidanesulfonic acid	N-Acetylgalactosamine 4-sulphate	CC(=O)N[C@H]1[C@H](O)O[C@H](CO)[C@H](OS(O)(=O)=O)[C@@H]1O	detected	C8H15N1O9S1	301.047	2	Metabolite
HMDB0000782	octadecanedioic acid	Octadecanedioic acid	OC(=O)CCCCCCCCCCCCCCCCC(O)=O	detected	C18H34O4	314.246	2	Metabolite
HMDB0000783	2-propanamidoacetic acid	Propionylglycine	CCC(=O)NCC(O)=O	quantified	C5H9N1O3	131.058	2	Metabolite
HMDB0000784	nonanedioic acid	Azelaic acid	OC(=O)CCCCCCCC(O)=O	quantified	C9H16O4	188.105	2	Metabolite
HMDB0000785	(2S,4S,5R,6R)-6-[(1R,2R)-1-(acetyloxy)-2,3-dihydroxypropyl]-5-acetamido-2,4-dihydroxyoxane-2-carboxylic acid	N-Acetyl-7-O-acetylneuraminic acid	CC(=O)N[C@@H]1[C@@H](O)C[C@](O)(O[C@H]1[C@H](OC(C)=O)[C@H](O)CO)C(O)=O	expected	C13H21N1O10	351.117	4	Metabolite
HMDB0000786	1H,2H,4H,5H,6H-pyrazolo[3,4-d]pyrimidine-4,6-dione	Oxypurinol	O=C1NC(=O)C2=CNNC2=N1	quantified	C5H4N4O2	152.033	6	Metabolite
HMDB0000787	2-amino-6-[(1R,2S)-1,2-dihydroxypropyl]-1,4,5,6,7,8-hexahydropteridin-4-one	Sapropterin	C[C@H](O)[C@H](O)C1CNC2=C(N1)C(=O)N=C(N)N2	quantified	C9H15N5O3	241.117	5	Metabolite
HMDB0000788	3-[(2R,3R,4S,5R)-3,4-dihydroxy-5-(hydroxymethyl)oxolan-2-yl]-2,6-dioxo-1,2,3,6-tetrahydropyrimidine-4-carboxylic acid	Orotidine	OC[C@H]1O[C@H]([C@H](O)[C@@H]1O)N1C(=O)NC(=O)C=C1C(O)=O	quantified	C10H12N2O8	288.059	6	Metabolite
HMDB0000789	3-[10,15,20-tris(2-carboxyethyl)-19-(carboxymethyl)-5,9,14-trimethyl-21,22,23,24-tetraazapentacyclo[16.2.1.1?6.18,????????.1????????,?]tetracosa-1(20),2,4,6,8(23),9,11,13(22),14,16,18-undecaen-4-yl]propanoic acid	Pentacarboxylporphyrin I	CC1=C(CCC(O)=O)/C2=C/C3=C(CCC(O)=O)C(CC(O)=O)=C(N3)\C=C3/N=C(/C=C4\N=C(\C=C\1/N\2)C(C)=C4CCC(O)=O)C(C)=C3CCC(O)=O	expected	C37H38N4O10	698.259	21	Metabolite
HMDB0000790	N-(1,3-dihydroxyoctadec-4-en-2-yl)hexadecanamide	N-Palmitoylsphingosine	CCCCCCCCCCCCCCCC(=O)NC(CO)C(O)C=CCCCCCCCCCCCCC	detected	C34H67N1O3	537.512	2	Metabolite
HMDB0000791	(3R)-3-(octanoyloxy)-4-(trimethylazaniumyl)butanoate	L-Octanoylcarnitine	CCCCCCCC(=O)O[C@H](CC([O-])=O)C[N+](C)(C)C	quantified	C15H29N1O4	287.21	2	Metabolite
HMDB0000792	decanedioic acid	Sebacic acid	OC(=O)CCCCCCCCC(O)=O	quantified	C10H18O4	202.121	2	Metabolite
HMDB0000793	(2R)-2-amino-3-[4-(4-hydroxyphenoxy)-3-iodophenyl]propanoic acid	Monoiodothyronine	N[C@H](CC1=CC(I)=C(OC2=CC=C(O)C=C2)C=C1)C(O)=O	expected	C15H14I1N1O4	398.997	9	Metabolite
HMDB0000794	(2S,4S,5R,6R)-6-[(1R,2R)-3-(acetyloxy)-1,2-dihydroxypropyl]-5-acetamido-2,4-dihydroxyoxane-2-carboxylic acid	N-Acetyl-9-O-acetylneuraminic acid	CC(=O)N[C@@H]1[C@@H](O)C[C@](O)(O[C@H]1[C@H](O)[C@H](O)COC(C)=O)C(O)=O	expected	C13H21N1O10	351.117	4	Metabolite
HMDB0000795	2,6,10,14-tetramethylpentadecanoic acid	Pristanic acid	CC(C)CCCC(C)CCCC(C)CCCC(C)C(O)=O	quantified	C19H38O2	298.287	1	Metabolite
HMDB0000796	(2S,4S,5R,6R)-4-(acetyloxy)-5-acetamido-2-hydroxy-6-(1,2,3-trihydroxypropyl)oxane-2-carboxylic acid	N-Acetyl-4-O-acetylneuraminic acid	CC(=O)N[C@@H]1[C@H](C[C@](O)(O[C@H]1C(O)C(O)CO)C(O)=O)OC(C)=O	expected	C13H21N1O10	351.117	4	Metabolite
HMDB0000797	(2S)-2-({5-amino-1-[(2R,3R,4S,5R)-3,4-dihydroxy-5-[(phosphonooxy)methyl]oxolan-2-yl]-1H-imidazol-4-yl}formamido)butanedioic acid	SAICAR	NC1=C(N=CN1[C@@H]1O[C@H](COP(O)(O)=O)[C@@H](O)[C@H]1O)C(=O)N[C@@H](CC(O)=O)C(O)=O	quantified	C13H19N4O12P1	454.074	7	Metabolite
HMDB0000798	ethyl heptanoate	Oenanthic ether	CCCCCCC(=O)OCC	detected	C9H18O2	158.131	1	Metabolite
HMDB0000801	3,7,11,15-tetramethylhexadecanoic acid	Phytanic acid	CC(C)CCCC(C)CCCC(C)CCCC(C)CC(O)=O	quantified	C20H40O2	312.303	1	Metabolite
HMDB0000802	2-amino-3,4-dihydropteridin-4-one	Pterin	NC1=NC2=NC=CN=C2C(=O)N1	detected	C6H5N5O1	163.049	7	Metabolite
HMDB0000803	N-[(2R,3R,4R,5S,6R)-2,4,5-trihydroxy-6-(hydroxymethyl)oxan-3-yl]acetamide	beta-N-Acetylglucosamine	CC(=O)N[C@H]1[C@H](O)O[C@H](CO)[C@@H](O)[C@@H]1O	detected	C8H15N1O6	221.09	2	Metabolite
HMDB0000805	5-oxopyrrolidine-2-carboxylic acid	Pyrrolidonecarboxylic acid	OC(=O)C1CCC(=O)N1	quantified	C5H7N1O3	129.043	3	Metabolite
HMDB0000806	tetradecanoic acid	Myristic acid	CCCCCCCCCCCCCC(O)=O	quantified	C14H28O2	228.209	1	Metabolite
HMDB0000807	2-hydroxy-3-(phosphonooxy)propanoic acid	3-Phosphoglyceric acid	OC(COP(O)(O)=O)C(O)=O	quantified	C3H7O7P1	185.993	1	Metabolite
HMDB0000808	2-butanamidoacetic acid	N-Butyrylglycine	CCCC(=O)NCC(O)=O	quantified	C6H11N1O3	145.074	2	Metabolite
HMDB0000809	(2S,4S,5R)-2-{[(2S,3R,4R,5S,6R)-2-{[(2R,3S,4R,5R,6R)-4,5-dihydroxy-6-{[(2R,3S,4E)-3-hydroxy-2-icosanamidoicos-4-en-1-yl]oxy}-2-(hydroxymethyl)oxan-3-yl]oxy}-5-{[(2S,3R,4R,5R,6R)-3-acetamido-5-hydroxy-6-(hydroxymethyl)-4-{[(2R,3R,4S,5R,6R)-3,4,5-trihydroxy-6-(hydroxymethyl)oxan-2-yl]oxy}oxan-2-yl]oxy}-3-hydroxy-6-methyloxan-4-yl]oxy}-5-acetamido-4-hydroxy-6-[(1R,2R)-1,2,3-trihydroxypropyl]oxane-2-…	N-Glycoloylganglioside GM1	CCCCCCCCCCCCCCCCCCCC(=O)N[C@H](CO[C@@H]1O[C@H](CO)[C@@H](O[C@@H]2O[C@H](C)[C@H](O[C@@H]3O[C@H](CO)[C@H](O)[C@H](O[C@@H]4O[C@H](CO)[C@H](O)[C@H](O)[C@H]4O)[C@H]3NC(C)=O)[C@H](O[C@@]3(C[C@H](O)[C@@H](NC(C)=O)C(O3)[C@H](O)[C@H](O)CO)C(O)=O)[C@H]2O)[C@H](O)[C@H]1O)[C@@H](O)\C=C\CCCCCCCCCCCCCCC	expected	C77H139N3O30	1585.94	10	Metabolite
HMDB0000810	methyl 3-[9,14-diethenyl-20-(3-methoxy-3-oxopropyl)-5,10,15,19-tetramethyl-21,22,23,24-tetraazapentacyclo[16.2.1.1?6.18,????????.1????????,?]tetracosa-1,3,5,7,9,11(23),12,14,16,18(21),19-undecaen-4-yl]propanoate	Dimethylprotoporphyrin IX dimethyl ester	COC(=O)CCC1=C2NC(\C=C3/N=C(/C=C4\N\C(=C/C5=N/C(=C\2)/C(CCC(=O)OC)=C5C)C(C)=C4C=C)C(C)=C3C=C)=C1C	expected	C36H38N4O4	590.289	20	Metabolite
HMDB0000811	(4R)-4-[(1S,2R,5R,7R,8R,10S,11S,14R,15R)-5,8-dihydroxy-2,15-dimethyltetracyclo[8.7.0.0?7.0????????,?]heptadecan-14-yl]pentanoic acid	Murocholic acid	[H][C@@]12CC[C@H]([C@H](C)CCC(O)=O)[C@@]1(C)CC[C@@]1([H])[C@@]2([H])C[C@@H](O)[C@]2([H])C[C@H](O)CC[C@]12C	expected	C24H40O4	392.293	5	Metabolite
HMDB0000812	(2S)-2-acetamidobutanedioic acid	N-Acetyl-L-aspartic acid	CC(=O)N[C@@H](CC(O)=O)C(O)=O	quantified	C6H9N1O5	175.048	3	Metabolite
HMDB0000814	{[(2R,3S,4R,5R,6R)-5-acetamido-3,4,6-trihydroxyoxan-2-yl]methoxy}sulfonic acid	N-Acetylglucosamine 6-sulfate	CC(=O)N[C@H]1[C@H](O)O[C@H](COS(O)(=O)=O)[C@@H](O)[C@@H]1O	quantified	C8H15N1O9S1	301.047	2	Metabolite
HMDB0000815	3-[10,15,20-tris(2-carboxyethyl)-9,14,19-tris(carboxymethyl)-5-methyl-21,22,23,24-tetraazapentacyclo[16.2.1.1?6.18,????????.1????????,?]tetracosa-1,3,5,7,9,11(23),12,14,16,18(21),19-undecaen-4-yl]propanoic acid	Pseudouroporphyrin	CC1=C2NC(\C=C3/N=C(/C=C4\N\C(=C/C5=N/C(=C\2)/C(CC(O)=O)=C5CCC(O)=O)C(CC(O)=O)=C4CCC(O)=O)C(CC(O)=O)=C3CCC(O)=O)=C1CCC(O)=O	expected	C39H38N4O14	786.238	23	Metabolite
HMDB0000816	2-(phosphonooxy)acetic acid	Phosphoglycolic acid	OC(=O)COP(O)(O)=O	expected	C2H5O6P1	155.982	1	Metabolite
HMDB0000817	2-amino-6-[(1S,2S)-1,2-dihydroxypropyl]-1,4-dihydropteridin-4-one	Orinapterin	C[C@H](O)[C@@H](O)C1=NC2=C(NC(N)=NC2=O)N=C1	expected	C9H11N5O3	237.086	7	Metabolite
HMDB0000819	4-(2-amino-1-hydroxyethyl)-2-methoxyphenol	Normetanephrine	COC1=CC(=CC=C1O)C(O)CN	quantified	C9H13N1O3	183.09	4	Metabolite
HMDB0000820	propan-1-ol	Propyl alcohol	CCCO	quantified	C3H8O1	60.0575	0	Metabolite
HMDB0000821	2-(2-phenylacetamido)acetic acid	Phenylacetylglycine	OC(=O)CNC(=O)CC1=CC=CC=C1	quantified	C10H11N1O3	193.074	6	Metabolite
HMDB0000822	2-hydroxy-2-(4-hydroxyphenyl)acetic acid	p-Hydroxymandelic acid	OC(C(O)=O)C1=CC=C(O)C=C1	quantified	C8H8O4	168.042	5	Metabolite
HMDB0000824	3-(propanoyloxy)-4-(trimethylazaniumyl)butanoate	Propionylcarnitine	CCC(=O)OC(CC([O-])=O)C[N+](C)(C)C	quantified	C10H19N1O4	217.131	2	Metabolite
HMDB0000825	(2S,4S,5R,6R)-2-{[(2R,3S,4S,5R,6S)-3,5-dihydroxy-2-(hydroxymethyl)-6-{[(2R,3R,4R,5R)-1,2,4,5-tetrahydroxy-6-oxohexan-3-yl]oxy}oxan-4-yl]oxy}-5-acetamido-4-hydroxy-6-[(1R,2R)-1,2,3-trihydroxypropyl]oxane-2-carboxylic acid	3'-Sialyllactose	[H][C@]1(O[C@@](C[C@H](O)[C@H]1NC(C)=O)(O[C@H]1[C@@H](O)[C@@H](CO)O[C@@H](O[C@H]([C@H](O)CO)[C@H](O)[C@@H](O)C=O)[C@@H]1O)C(O)=O)[C@H](O)[C@H](O)CO	quantified	C23H39N1O19	633.212	5	Metabolite
HMDB0000826	pentadecanoic acid	Pentadecanoic acid	CCCCCCCCCCCCCCC(O)=O	quantified	C15H30O2	242.225	1	Metabolite
HMDB0000827	octadecanoic acid	Stearic acid	CCCCCCCCCCCCCCCCCC(O)=O	quantified	C18H36O2	284.272	1	Metabolite
HMDB0000828	(2S)-2-(carbamoylamino)butanedioic acid	Ureidosuccinic acid	NC(=O)N[C@@H](CC(O)=O)C(O)=O	quantified	C5H8N2O5	176.043	3	Metabolite
HMDB0000829	N-(1,3-dihydroxyoctadec-4-en-2-yl)octadecanamide	N-Stearoylsphingosine	CCCCCCCCCCCCCCCCCC(=O)NC(CO)C(O)C=CCCCCCCCCCCCCC	expected	C36H71N1O3	565.543	2	Metabolite
HMDB0000830	(2S,4S,5R,6R)-5-amino-2,4-dihydroxy-6-[(1R,2R)-1,2,3-trihydroxypropyl]oxane-2-carboxylic acid	Neuraminic acid	N[C@@H]1[C@@H](O)C[C@](O)(O[C@H]1[C@H](O)[C@H](O)CO)C(O)=O	quantified	C9H17N1O8	267.095	2	Metabolite
HMDB0000831	N-(1,3-dihydroxyoctadec-4-en-2-yl)tetracosanamide	N-Lignoceroylsphingosine	CCCCCCCCCCCCCCCCCCCCCCCC(=O)NC(CO)C(O)C=CCCCCCCCCCCCCC	expected	C42H83N1O3	649.637	2	Metabolite
HMDB0000832	2-octanamidoacetic acid	Capryloylglycine	CCCCCCCC(=O)NCC(O)=O	quantified	C10H19N1O3	201.136	2	Metabolite
HMDB0000833	(2S,4S,5R,6R)-2,4-dihydroxy-5-(2-hydroxyacetamido)-6-[(1R,2R)-1,2,3-trihydroxypropyl]oxane-2-carboxylic acid	N-Glycolylneuraminic acid	OC[C@@H](O)[C@@H](O)[C@@H]1O[C@@](O)(C[C@H](O)[C@H]1NC(=O)CO)C(O)=O	expected	C11H19N1O10	325.101	3	Metabolite
HMDB0000839	21,22,23,24-tetraazapentacyclo[16.2.1.1?6.18,????????.1????????,?]tetracosa-1,3,5,7,9,11,13(22),14,16,18(21),19-undecaene	Pentaporphyrin I	N1C2=CC=C1\C=C1\C=CC(\C=C3\C=CC(\C=C4/N\C(\C=C4)=C/2)=N3)=N1	expected	C20H14N4	310.122	16	Metabolite
HMDB0000840	2-[(2-hydroxyphenyl)formamido]acetic acid	Salicyluric acid	OC(=O)CNC(=O)C1=CC=CC=C1O	quantified	C9H9N1O4	195.053	6	Metabolite
HMDB0000841	{[(2R,3R,4R,5R)-5-acetamido-2,3,4-trihydroxy-6-oxohexyl]oxy}sulfonic acid	N-Acetylgalactosamine 6-sulfate	CC(=O)N[C@@H](C=O)[C@@H](O)[C@@H](O)[C@H](O)COS(O)(=O)=O	expected	C8H15N1O9S1	301.047	2	Metabolite
HMDB0000842	quinoline-2-carboxylic acid	Quinaldic acid	OC(=O)C1=NC2=C(C=CC=C2)C=C1	expected	C10H7N1O2	173.048	8	Metabolite
HMDB0000843	[(2R,3R,4R,5R)-5-acetamido-4,6-dihydroxy-2-[(sulfooxy)methyl]oxan-3-yl]oxidanesulfonic acid	N-Acetylgalactosamine 4,6-disulfate	CC(=O)N[C@H]1C(O)O[C@H](COS(O)(=O)=O)[C@H](OS(O)(=O)=O)[C@@H]1O	expected	C8H15N1O12S2	381.004	2	Metabolite
HMDB0000845	2-amino-6-(1,2,3-trihydroxypropyl)-3,4-dihydropteridin-4-one	Neopterin	NC1=NC2=C(N=C(C=N2)C(O)C(O)CO)C(=O)N1	quantified	C9H11N5O4	253.081	7	Metabolite
HMDB0000847	nonanoic acid	Pelargonic acid	CCCCCCCCC(O)=O	detected	C9H18O2	158.131	1	Metabolite
HMDB0000848	(3R)-3-(octadecanoyloxy)-4-(trimethylazaniumyl)butanoate	Stearoylcarnitine	CCCCCCCCCCCCCCCCCC(=O)O[C@H](CC([O-])=O)C[N+](C)(C)C	quantified	C25H49N1O4	427.366	2	Metabolite
HMDB0000849	(3R,4R,5R,6S)-6-methyloxane-2,3,4,5-tetrol	Rhamnose	C[C@@H]1OC(O)[C@H](O)[C@H](O)[C@H]1O	detected	C6H12O5	164.068	1	Metabolite
HMDB0000851	4-[(2S)-2-amino-2-carboxyethyl]-3-[(3S)-3-amino-3-carboxypropyl]-1-[(2R,5S)-5-amino-5-carboxylato-2-hydroxypentyl]-5-hydroxypyridin-1-ium	Pyridinoline	N[C@@H](CCC1=C[N+](C[C@H](O)CC[C@H](N)C([O-])=O)=CC(O)=C1C[C@H](N)C(O)=O)C(O)=O	quantified	C18H28N4O8	428.191	7	Metabolite
HMDB0000852	(1S,2R,5S,10S,11S,14R,15R)-14-[(2R,5R)-5-ethyl-6-methylheptan-2-yl]-2,15-dimethyltetracyclo[8.7.0.0^{2,7}.0^{11,15}]heptadec-7-en-5-ol	beta-Sitosterol	[H][C@@]1(CC[C@@]2([H])[C@]3([H])CC=C4C[C@@H](O)CC[C@]4(C)[C@@]3([H])CC[C@]12C)[C@H](C)CC[C@@H](CC)C(C)C	quantified	C29H50O1	414.386	5	Metabolite
HMDB0000853	N-[(2R,3R,4R,5R,6R)-2,4,5-trihydroxy-6-(hydroxymethyl)oxan-3-yl]acetamide	N-Acetyl-b-D-galactosamine	CC(=O)N[C@H]1[C@H](O)O[C@H](CO)[C@H](O)[C@@H]1O	detected	C8H15N1O6	221.09	2	Metabolite
HMDB0000854	(2S)-2-methanimidamidopentanedioic acid	Formiminoglutamic acid	OC(=O)CC[C@H](NC=N)C(O)=O	quantified	C6H10N2O4	174.064	3	Metabolite
HMDB0000855	3-carbamoyl-1-[(2R,3R,4S,5R)-3,4-dihydroxy-5-(hydroxymethyl)oxolan-2-yl]-1<U+03BB>5-pyridin-1-ylium	Nicotinamide riboside	NC(=O)C1=C[N+](=CC=C1)[C@@H]1O[C@H](CO)[C@@H](O)[C@H]1O	detected	C11H14N2O5	254.09	6	Metabolite
HMDB0000856	5-(carbamoylamino)-2-acetamidopentanoic acid	N-a-Acetylcitrulline	CC(=O)NC(CCCNC(N)=O)C(O)=O	detected	C8H15N3O4	217.106	3	Metabolite
HMDB0000857	heptanedioic acid	Pimelic acid	OC(=O)CCCCCC(O)=O	quantified	C7H12O4	160.074	2	Metabolite
HMDB0000858	5-methoxy-5-oxopentanoic acid	Monomethyl glutaric acid	COC(=O)CCCC(O)=O	quantified	C6H10O4	146.058	2	Metabolite
HMDB0000859	methyl 2-(phenylformamido)acetate	Methyl hippurate	COC(=O)CNC(=O)C1=CC=CC=C1	expected	C10H11N1O3	193.074	6	Metabolite
HMDB0000860	2-(3-phenylpropanamido)acetic acid	Phenylpropionylglycine	OC(=O)CNC(=O)CCC1=CC=CC=C1	quantified	C11H13N1O3	207.09	6	Metabolite
HMDB0000863	propan-2-ol	Isopropyl alcohol	CC(C)O	quantified	C3H8O1	60.0575	0	Metabolite
HMDB0000865	(4R)-4-[(1S,2R,5R,7R,10S,11S,14R,15R)-5,8,9-trihydroxy-2,15-dimethyltetracyclo[8.7.0.0?7.0????????,?]heptadecan-14-yl]pentanoic acid	Muricholic acid	[H][C@@]1(CC[C@@]2([H])[C@]3([H])C(O)C(O)[C@]4([H])C[C@H](O)CC[C@]4(C)[C@@]3([H])CC[C@]12C)[C@H](C)CCC(O)=O	expected	C24H40O5	408.288	5	Metabolite
HMDB0000866	(2S)-2-acetamido-3-(4-hydroxyphenyl)propanoic acid	N-Acetyl-L-tyrosine	CC(=O)N[C@@H](CC1=CC=C(O)C=C1)C(O)=O	quantified	C11H13N1O4	223.084	6	Metabolite
HMDB0000867	(2R,3R,4R)-2,3,4,5-tetrahydroxypentanoic acid	Ribonic acid	OC[C@@H](O)[C@@H](O)[C@@H](O)C(O)=O	detected	C5H10O6	166.048	1	Metabolite
HMDB0000868	{[(2R,3S)-2,3,5-trihydroxy-4-oxopentyl]oxy}phosphonic acid	Xylulose 5-phosphate	OCC(=O)[C@@H](O)[C@H](O)COP(O)(O)=O	quantified	C5H11O8P1	230.019	1	Metabolite
HMDB0000869	methyl 9,19-bis(2-methoxy-2-oxoethyl)-5,10,14,15,20-pentakis(3-methoxy-3-oxopropyl)-21,22,23,24-tetraazapentacyclo[16.2.1.1?6.18,????????.1????????,?]tetracosa-1,3,5,7,9,11(23),12,14,16,18(21),19-undecaene-4-carboxylate	Uroporphyrin II	COC(=O)CCC1=C(CCC(=O)OC)/C2=C/C3=N/C(=C\C4=C(C(=O)OC)C(CCC(=O)OC)=C(N4)/C=C4\N=C(\C=C\1/N\2)C(CCC(=O)OC)=C4CC(=O)OC)/C(CCC(=O)OC)=C3CC(=O)OC	expected	C48H54N4O16	942.353	24	Metabolite
HMDB0000870	2-(1H-imidazol-4-yl)ethan-1-amine	Histamine	NCCC1=CNC=N1	quantified	C5H9N3	111.08	3	Metabolite
HMDB0000871	(1S,2S,7S,10R,11S,14R,15R)-2,15-dimethyl-14-[(2R)-6-methylheptan-2-yl]tetracyclo[8.7.0.0?7.0????????,?]heptadecan-5-one	5alpha-Cholestanone	[H][C@@]1(CC[C@@]2([H])[C@]3([H])CC[C@@]4([H])CC(=O)CC[C@]4(C)[C@@]3([H])CC[C@]12C)[C@H](C)CCCC(C)C	expected	C27H46O1	386.355	5	Metabolite
HMDB0000872	tetradecanedioic acid	Tetradecanedioic acid	OC(=O)CCCCCCCCCCCCC(O)=O	detected	C14H26O4	258.183	2	Metabolite
HMDB0000873	4-methylbenzene-1,2-diol	4-Methylcatechol	CC1=CC=C(O)C(O)=C1	quantified	C7H8O2	124.052	4	Metabolite
HMDB0000874	2-[(4R)-4-[(1S,2S,5R,9S,10R,11S,14R,15R)-5,9-dihydroxy-2,15-dimethyltetracyclo[8.7.0.0?7.0????????,?]heptadecan-14-yl]pentanamido]ethane-1-sulfonic acid	Tauroursodeoxycholic acid	[H][C@@]12CC[C@H]([C@H](C)CCC(=O)NCCS(O)(=O)=O)[C@@]1(C)CC[C@@]1([H])[C@@]2([H])[C@@H](O)CC2C[C@H](O)CC[C@]12C	quantified	C26H45N1O6S1	499.297	5	Metabolite
HMDB0000875	1-methylpyridin-1-ium-3-carboxylate	Trigonelline	C[N+]1=CC=CC(=C1)C([O-])=O	quantified	C7H7N1O2	137.048	5	Metabolite
HMDB0000876	(1S,3Z)-3-{2-[(1R,3aS,4E,7aR)-7a-methyl-1-[(2R)-6-methylheptan-2-yl]-octahydro-1H-inden-4-ylidene]ethylidene}-4-methylidenecyclohexan-1-ol	Vitamin D3	[H][C@@]1(CC[C@@]2([H])\C(CCC[C@]12C)=C\C=C1\C[C@@H](O)CCC1=C)[C@H](C)CCCC(C)C	quantified	C27H44O1	384.339	6	Metabolite
HMDB0000877	2-amino-6-[(1S,2S)-1,2,3-trihydroxypropyl]-1,4-dihydropteridin-4-one	Umanopterin	NC1=NC(=O)C2=C(N1)N=CC(=N2)[C@H](O)[C@@H](O)CO	expected	C9H11N5O4	253.081	7	Metabolite
HMDB0000878	(2R,5S,15R)-14-[(2R,3E,5R)-5,6-dimethylhept-3-en-2-yl]-2,15-dimethyltetracyclo[8.7.0.0?7.0????????,?]heptadeca-7,9-dien-5-ol	Ergosterol	CC(C)[C@@H](C)\C=C\[C@@H](C)C1CCC2C3=CC=C4C[C@@H](O)CC[C@]4(C)C3CC[C@]12C	quantified	C28H44O1	396.339	7	Metabolite
HMDB0000879	2-hydroxy-1-[(1S,2S,5R,7S,10R,11S,14S,15S)-5-hydroxy-2,15-dimethyltetracyclo[8.7.0.0?7.0????????,?]heptadecan-14-yl]ethan-1-one	Tetrahydrodeoxycorticosterone	[H][C@@]12CC[C@H](C(=O)CO)[C@@]1(C)CC[C@@]1([H])[C@@]2([H])CC[C@@]2([H])C[C@H](O)CC[C@]12C	quantified	C21H34O3	334.251	5	Metabolite
HMDB0000881	4,8-dihydroxyquinoline-2-carboxylic acid	Xanthurenic acid	OC(=O)C1=NC2=C(O)C=CC=C2C(O)=C1	quantified	C10H7N1O4	205.038	8	Metabolite
HMDB0000883	(2S)-2-amino-3-methylbutanoic acid	L-Valine	CC(C)[C@H](N)C(O)=O	quantified	C5H11N1O2	117.079	1	Metabolite
HMDB0000884	1-[(2R,3R,4S,5R)-3,4-dihydroxy-5-(hydroxymethyl)oxolan-2-yl]-5-methyl-1,2,3,4-tetrahydropyrimidine-2,4-dione	Ribothymidine	CC1=CN([C@@H]2O[C@H](CO)[C@@H](O)[C@H]2O)C(=O)NC1=O	quantified	C10H14N2O6	258.085	5	Metabolite
HMDB0000885	(1S,2R,5S,10S,11S,14R,15R)-2,15-dimethyl-14-[(2R)-6-methylheptan-2-yl]tetracyclo[8.7.0.0?7.0????????,?]heptadec-7-en-5-yl hexadecanoate	CE(16:0)	[H][C@@]1(CC[C@@]2([H])[C@]3([H])CC=C4C[C@H](CC[C@]4(C)[C@@]3([H])CC[C@]12C)OC(=O)CCCCCCCCCCCCCCC)[C@H](C)CCCC(C)C	quantified	C43H76O2	624.585	6	Metabolite
HMDB0000887	3-[5-(2-carboxyethyl)-1-chloro-14,19-diethenyl-4,10,15,20-tetramethyl-2lambda4,22,23lambda4,25-tetraaza-1-ferraoctacyclo[11.9.1.1^{1,8}.1^{3,21}.0^{2,6}.0^{16,23}.0^{18,22}.0^{11,25}]pentacosa-2(6),3(24),4,7,9,11,13(23),14,16,18,20-undecaen-9-yl]propanoic acid	Hemin	CC1=C(CCC(O)=O)C2=CC3=[N]4C(=CC5=C(C)C(C=C)=C6C=C7C(C)=C(C=C)C8=[N]7[Fe]4(Cl)(N2C1=C8)N56)C(C)=C3CCC(O)=O	expected	C34Cl1Fe1H32N4O4	651.146	20.5	Metabolite
HMDB0000888	undecanedioic acid	Undecanedioic acid	OC(=O)CCCCCCCCCC(O)=O	quantified	C11H20O4	216.136	2	Metabolite
HMDB0000889	2-[(4R)-4-[(2S,5R,7S,9S,14R,15R,16S)-5,9,16-trihydroxy-2,15-dimethyltetracyclo[8.7.0.0?7.0????????,?]heptadecan-14-yl]pentanamido]ethane-1-sulfonic acid	Tauroursocholic acid	[H][C@@]12C[C@H](O)CC[C@]1(C)C1C[C@H](O)[C@]3(C)[C@H](CCC3C1[C@@H](O)C2)[C@H](C)CCC(=O)NCCS(O)(=O)=O	expected	C26H45N1O7S1	515.292	5	Metabolite
HMDB0000890	3-[10,15,19-tris(2-carboxyethyl)-5,9,14,20-tetrakis(carboxymethyl)-21,22,23,24-tetraazapentacyclo[16.2.1.1?6.18,????????.1????????,?]tetracosa-1(21),2,4,6,8(23),9,11,13,15,17,19-undecaen-4-yl]propanoic acid	Uroporphyrin IV	OC(=O)CCC1=C(CC(O)=O)/C2=C/C3=N/C(=C\C4=C(CC(O)=O)C(CCC(O)=O)=C(N4)/C=C4\N=C(\C=C\1/N\2)C(CC(O)=O)=C4CCC(O)=O)/C(CCC(O)=O)=C3CC(O)=O	expected	C40H38N4O16	830.228	24	Metabolite
HMDB0000892	pentanoic acid	Valeric acid	CCCCC(O)=O	quantified	C5H10O2	102.068	1	Metabolite
HMDB0000893	octanedioic acid	Suberic acid	OC(=O)CCCCCCC(O)=O	quantified	C8H14O4	174.089	2	Metabolite
HMDB0000894	2-(but-3-enamido)acetic acid	Vinylacetylglycine	OC(=O)CNC(=O)CC=C	expected	C6H9N1O3	143.058	3	Metabolite
HMDB0000895	[2-(acetyloxy)ethyl]trimethylazanium	Acetylcholine	CC(=O)OCC[N+](C)(C)C	quantified	C7H15N1O2	145.11	1	Metabolite
HMDB0000896	2-[(4R)-4-[(1S,2S,5R,7R,10R,11S,14R,15R,16S)-5,16-dihydroxy-2,15-dimethyltetracyclo[8.7.0.0?7.0????????,?]heptadecan-14-yl]pentanamido]ethane-1-sulfonic acid	Taurodeoxycholic acid	[H][C@@]1(CC[C@@]2([H])[C@]3([H])CC[C@]4([H])C[C@H](O)CC[C@]4(C)[C@@]3([H])C[C@H](O)[C@]12C)[C@H](C)CCC(=O)NCCS(O)(=O)=O	quantified	C26H45N1O6S1	499.297	5	Metabolite
HMDB0000897	2-amino-7-methyl-6,7-dihydro-3H-purin-6-one	7-Methylguanine	CN1C=NC2=C1C(=O)N=C(N)N2	quantified	C6H7N5O1	165.065	6	Metabolite
HMDB0000898	2-(1-methyl-1H-imidazol-4-yl)ethan-1-amine	1-Methylhistamine	CN1C=NC(CCN)=C1	quantified	C6H11N3	125.095	3	Metabolite
HMDB0000899	(1S,2S,7S,10R,11S,15S)-2,15-dimethyltetracyclo[8.7.0.0?7.0????????,?]heptadecane-5,14-dione	Androstanedione	[H][C@@]12CCC(=O)[C@@]1(C)CC[C@@]1([H])[C@@]2([H])CC[C@@]2([H])CC(=O)CC[C@]12C	quantified	C19H28O2	288.209	6	Metabolite
HMDB0000900	(1S,3Z)-3-{2-[(1R,3aS,4E,7aR)-1-[(2R,3E,5R)-5,6-dimethylhept-3-en-2-yl]-7a-methyl-octahydro-1H-inden-4-ylidene]ethylidene}-4-methylidenecyclohexan-1-ol	Ergocalciferol	CC(C)[C@@H](C)\C=C\[C@@H](C)[C@@]1([H])CC[C@@]2([H])\C(CCC[C@]12C)=C\C=C1\C[C@@H](O)CCC1=C	quantified	C28H44O1	396.339	7	Metabolite
HMDB0000901	(2S,3S,4S,5R,6S)-3,4,5-trihydroxy-6-[(2-propylpentanoyl)oxy]oxane-2-carboxylic acid	Valproic acid glucuronide	CCCC(CCC)C(=O)O[C@@H]1O[C@@H]([C@@H](O)[C@H](O)[C@H]1O)C(O)=O	expected	C14H24O8	320.147	3	Metabolite
HMDB0000902	1-[(2R,3R,4S,5R)-5-[({[({[(2R,3S,4R,5R)-5-(6-amino-9H-purin-9-yl)-3,4-dihydroxyoxolan-2-yl]methoxy}(hydroxy)phosphoryl)oxy](hydroxy)phosphoryl}oxy)methyl]-3,4-dihydroxyoxolan-2-yl]-3-carbamoyl-1<U+03BB>5-pyridin-1-ylium	NAD	NC(=O)C1=C[N+](=CC=C1)[C@@H]1O[C@H](COP(O)(=O)OP(O)(=O)OC[C@H]2O[C@H]([C@H](O)[C@@H]2O)N2C=NC3=C2N=CN=C3N)[C@@H](O)[C@H]1O	quantified	C21H27N7O14P2	663.109	13	Metabolite
HMDB0000903	(1S,2S,5S,7S,10S,11S,14R,15S)-5,14-dihydroxy-14-(2-hydroxyacetyl)-2,15-dimethyltetracyclo[8.7.0.0?7.0????????,?]heptadecan-17-one	Tetrahydrocortisone	[H][C@@]12CC[C@](O)(C(=O)CO)[C@@]1(C)CC(=O)[C@@]1([H])[C@@]2([H])CC[C@@]2([H])C[C@@H](O)CC[C@]12C	quantified	C21H32O5	364.225	6	Metabolite
HMDB0000904	(2S)-2-amino-5-(carbamoylamino)pentanoic acid	Citrulline	N[C@@H](CCCNC(N)=O)C(O)=O	quantified	C6H13N3O3	175.096	2	Metabolite
HMDB0000905	{[(2R,3S,5R)-5-(6-amino-9H-purin-9-yl)-3-hydroxyoxolan-2-yl]methoxy}phosphonic acid	Deoxyadenosine monophosphate	NC1=NC=NC2=C1N=CN2[C@H]1C[C@H](O)[C@@H](COP(O)(O)=O)O1	detected	C10H14N5O6P1	331.068	7	Metabolite
HMDB0000906	trimethylamine	Trimethylamine	CN(C)C	quantified	C3H9N1	59.0735	0	Metabolite
HMDB0000907	(4R)-4-[(1S,2S,5R,10R,11S,14R,15R)-2,15-dimethyl-5-(sulfooxy)tetracyclo[8.7.0.0?7.0????????,?]heptadecan-14-yl]pentanoic acid	Sulfolithocholic acid	[H][C@@]12CC[C@H]([C@H](C)CCC(O)=O)[C@@]1(C)CC[C@@]1([H])[C@@]2([H])CCC2C[C@@H](CC[C@]12C)OS(O)(=O)=O	quantified	C24H40O6S1	456.255	5	Metabolite
HMDB0000908	(1S,2S,5S,7S,10R,11S,14R,15R)-2,15-dimethyl-14-[(2R)-6-methylheptan-2-yl]tetracyclo[8.7.0.0?7.0????????,?]heptadecan-5-ol	5alpha-Cholestanol	[H][C@@]1(CC[C@@]2([H])[C@]3([H])CC[C@@]4([H])C[C@@H](O)CC[C@]4(C)[C@@]3([H])CC[C@]12C)[C@H](C)CCCC(C)C	quantified	C27H48O1	388.371	4	Metabolite
HMDB0000909	2-[(1r,4r)-4-hydroxycyclohexyl]acetic acid	trans-4-Hydroxycyclohexylacetic acid	O[C@H]1CC[C@H](CC(O)=O)CC1	detected	C8H14O3	158.094	2	Metabolite
HMDB0000910	tridecanoic acid	Tridecanoic acid	CCCCCCCCCCCCC(O)=O	detected	C13H26O2	214.193	1	Metabolite
HMDB0000912	(2S)-2-({9-[(2R,3R,4S,5R)-3,4-dihydroxy-5-(hydroxymethyl)oxolan-2-yl]-9H-purin-6-yl}amino)butanedioic acid	Succinyladenosine	OC[C@H]1O[C@H]([C@H](O)[C@@H]1O)N1C=NC2=C(N[C@@H](CC(O)=O)C(O)=O)N=CN=C12	quantified	C14H17N5O8	383.108	9	Metabolite
HMDB0000913	2-hydroxy-3-(4-hydroxy-3-methoxyphenyl)propanoic acid	Vanillactic acid	COC1=CC(CC(O)C(O)=O)=CC=C1O	quantified	C10H12O5	212.068	5	Metabolite
HMDB0000916	3-[9,14,20-tris(2-carboxyethyl)-5,10,15,19-tetrakis(carboxymethyl)-21,22,23,24-tetraazapentacyclo[16.2.1.1^{3,6}.1^{8,11}.1^{13,16}]tetracosa-1,3,5,7,9,11(23),12,14,16,18(21),19-undecaen-4-yl]propanoic acid	Uroporphyrin III	OC(=O)CCC1=C(CC(O)=O)/C2=C/C3=N/C(=C\C4=C(CCC(O)=O)C(CC(O)=O)=C(N4)/C=C4\N=C(\C=C\1/N\2)C(CCC(O)=O)=C4CC(O)=O)/C(CC(O)=O)=C3CCC(O)=O	quantified	C40H38N4O16	830.228	24	Metabolite
HMDB0000917	(4R)-4-[(1S,2S,5R,7S,9S,10R,11S,14R,15R,16S)-5,9,16-trihydroxy-2,15-dimethyltetracyclo[8.7.0.0?7.0????????,?]heptadecan-14-yl]pentanoic acid	Ursocholic acid	[H][C@@]12CC[C@H]([C@H](C)CCC(O)=O)[C@@]1(C)[C@@H](O)C[C@@]1([H])[C@@]2([H])[C@@H](O)C[C@]2([H])C[C@H](O)CC[C@]12C	quantified	C24H40O5	408.288	5	Metabolite
HMDB0000918	(2R,5S,15R)-2,15-dimethyl-14-[(2R)-6-methylheptan-2-yl]tetracyclo[8.7.0.0^{2,7}.0^{11,15}]heptadec-7-en-5-yl (9Z)-octadec-9-enoate	CE(18:1(9Z))	CCCCCCCC\C=C/CCCCCCCC(=O)O[C@H]1CC[C@]2(C)C3CC[C@]4(C)C(CCC4C3CC=C2C1)[C@H](C)CCCC(C)C	quantified	C45H78O2	650.6	7	Metabolite
HMDB0000920	(1S,2R,10S,11S,15S,17R)-14-acetyl-17-hydroxy-2,15-dimethyltetracyclo[8.7.0.0?7.0????????,?]heptadec-6-en-5-one	11a-Hydroxyprogesterone	[H][C@@]12CCC(C(C)=O)[C@@]1(C)C[C@@H](O)[C@@]1([H])[C@@]2([H])CCC2=CC(=O)CC[C@]12C	expected	C21H30O3	330.219	7	Metabolite
HMDB0000921	(1S,2R,10S,11S,14R,15R)-2,15-dimethyl-14-[(2R)-6-methylheptan-2-yl]tetracyclo[8.7.0.0?7.0????????,?]heptadec-6-en-5-one	Cholestenone	[H][C@@]12CC[C@H]([C@H](C)CCCC(C)C)[C@@]1(C)CC[C@@]1([H])[C@@]2([H])CCC2=CC(=O)CC[C@]12C	quantified	C27H44O1	384.339	6	Metabolite
HMDB0000922	2-[(4R)-4-[(2S,5R,7R,9R,14R,15R,16S)-5,9,16-trihydroxy-2,15-dimethyltetracyclo[8.7.0.0?7.0????????,?]heptadecan-14-yl]pentanamido]ethane-1-sulfonic acid	Taurallocholic acid	[H][C@]12C[C@H](O)CC[C@]1(C)C1C[C@H](O)[C@]3(C)[C@H](CCC3C1[C@H](O)C2)[C@H](C)CCC(=O)NCCS(O)(=O)=O	expected	C26H45N1O7S1	515.292	5	Metabolite
HMDB0000925	N,N-dimethylmethanamine oxide	Trimethylamine N-oxide	C[N+](C)(C)[O-]	quantified	C3H9N1O1	75.0684	0	Metabolite
HMDB0000926	pyridine	Pyridine	C1=CC=NC=C1	detected	C5H5N1	79.0422	4	Metabolite
HMDB0000927	2-pentanamidoacetic acid	Valerylglycine	CCCCC(=O)NCC(O)=O	quantified	C7H13N1O3	159.09	2	Metabolite
HMDB0000929	(2S)-2-amino-3-(1H-indol-3-yl)propanoic acid	L-Tryptophan	N[C@@H](CC1=CNC2=C1C=CC=C2)C(O)=O	quantified	C11H12N2O2	204.09	7	Metabolite
HMDB0000930	(2E)-3-phenylprop-2-enoic acid	trans-Cinnamic acid	OC(=O)\C=C\C1=CC=CC=C1	quantified	C9H8O2	148.052	6	Metabolite
HMDB0000932	2-[(4R)-4-[(2R,5R,7R,8S,9R,14R,15R)-5,8,9-trihydroxy-2,15-dimethyltetracyclo[8.7.0.0?7.0????????,?]heptadecan-14-yl]pentanamido]ethane-1-sulfonic acid	Tauro-b-muricholic acid	[H][C@@]12C[C@H](O)CC[C@]1(C)C1CC[C@]3(C)[C@H](CCC3C1[C@@H](O)[C@H]2O)[C@H](C)CCC(=O)NCCS(O)(=O)=O	expected	C26H45N1O7S1	515.292	5	Metabolite
HMDB0000933	(2E)-dodec-2-enedioic acid	Traumatic acid	OC(=O)CCCCCCCC\C=C\C(O)=O	detected	C12H20O4	228.136	3	Metabolite
HMDB0000934	[({[(2R,3S,4R,5R)-3-[({[(2R,3R,4R,5R)-5-amino-1,2,4-trihydroxy-6,7-dioxooctan-3-yl]oxy}sulfonyl)oxy]-5-(2,4-dioxo-1,2,3,4-tetrahydropyrimidin-1-yl)-4-hydroxyoxolan-2-yl]methoxy}(hydroxy)phosphoryl)oxy]phosphonic acid	Uridine diphosphate acetylgalactosamine 4-sulfate	CC(=O)C(=O)[C@H](N)[C@@H](O)[C@@H](OS(=O)(=O)O[C@@H]1[C@@H](COP(O)(=O)OP(O)(O)=O)O[C@H]([C@@H]1O)N1C=CC(=O)NC1=O)[C@H](O)CO	expected	C17H27N3O20P2S1	687.038	7	Metabolite
HMDB0000935	(2S,3S,4S,5R,6R)-6-({[({[(2R,3S,4R,5R)-5-(2,4-dioxo-1,2,3,4-tetrahydropyrimidin-1-yl)-3,4-dihydroxyoxolan-2-yl]methoxy}(hydroxy)phosphoryl)oxy](hydroxy)phosphoryl}oxy)-3,4,5-trihydroxyoxane-2-carboxylic acid	Uridine diphosphate glucuronic acid	O[C@@H]1[C@@H](COP(O)(=O)OP(O)(=O)O[C@H]2O[C@@H]([C@@H](O)[C@H](O)[C@H]2O)C(O)=O)O[C@H]([C@@H]1O)N1C=CC(=O)NC1=O	expected	C15H22N2O18P2	580.034	7	Metabolite
HMDB0000936	3-[9,14,19-tris(2-carboxyethyl)-5,10,15,20-tetrakis(carboxymethyl)-21,22,23,24-tetraazapentacyclo[16.2.1.1?6.18,????????.1????????,?]tetracosa-1(21),2,4,6,8(23),9,11,13,15,17,19-undecaen-4-yl]propanoic acid	Uroporphyrin I	OC(=O)CCC1=C(CC(O)=O)/C2=C/C3=N/C(=C\C4=C(CCC(O)=O)C(CC(O)=O)=C(N4)/C=C4\N=C(\C=C\1/N\2)C(CC(O)=O)=C4CCC(O)=O)/C(CC(O)=O)=C3CCC(O)=O	quantified	C40H38N4O16	830.228	24	Metabolite
HMDB0000937	(1S,2R,5S,10S,11S,14R,15R)-14-[(2R,3E,5S)-5-ethyl-6-methylhept-3-en-2-yl]-2,15-dimethyltetracyclo[8.7.0.0?7.0????????,?]heptadec-7-en-5-ol	Stigmasterol	[H][C@@]1(CC[C@@]2([H])[C@]3([H])CC=C4C[C@@H](O)CC[C@]4(C)[C@@]3([H])CC[C@]12C)[C@H](C)\C=C\[C@@H](CC)C(C)C	quantified	C29H48O1	412.371	6	Metabolite
HMDB0000939	(2S)-2-amino-4-({[(2S,3S,4R,5R)-5-(6-amino-9H-purin-9-yl)-3,4-dihydroxyoxolan-2-yl]methyl}sulfanyl)butanoic acid	S-Adenosylhomocysteine	N[C@@H](CCSC[C@H]1O[C@H]([C@H](O)[C@@H]1O)N1C=NC2=C1N=CN=C2N)C(O)=O	quantified	C14H20N6O5S1	384.122	8	Metabolite
HMDB0000940	(3R,4S)-3,4-dihydroxyoxolan-2-one	Threonolactone	O[C@H]1COC(=O)[C@@H]1O	expected	C4H6O4	118.027	2	Metabolite
HMDB0000941	(1S,2R,10S,11S,14R,15R)-2,15-dimethyl-14-[(2R)-6-methylheptan-2-yl]tetracyclo[8.7.0.0?7.0????????,?]heptadec-7-ene	Cholest-5-ene	[H][C@@]12CC[C@H]([C@H](C)CCCC(C)C)[C@@]1(C)CC[C@@]1([H])[C@@]2([H])CC=C2CCCC[C@]12C	expected	C27H46	370.36	5	Metabolite
HMDB0000942	2-amino-6-(1,2,3-trihydroxypropyl)-1,4,5,6,7,8-hexahydropteridin-4-one	Tetrahydroneopterin	NC1=NC(=O)C2=C(NCC(N2)C(O)C(O)CO)N1	expected	C9H15N5O4	257.112	5	Metabolite
HMDB0000943	(2S,3R)-2,3,4-trihydroxybutanoic acid	Threonic acid	OC[C@@H](O)[C@H](O)C(O)=O	quantified	C4H8O5	136.037	1	Metabolite
HMDB0000944	docosanoic acid	Behenic acid	CCCCCCCCCCCCCCCCCCCCCC(O)=O	quantified	C22H44O2	340.334	1	Metabolite
HMDB0000946	(4R)-4-[(1S,2S,5R,7S,9S,10R,11S,14R,15R)-5,9-dihydroxy-2,15-dimethyltetracyclo[8.7.0.0?7.0????????,?]heptadecan-14-yl]pentanoic acid	Ursodeoxycholic acid	[H][C@@]1(CC[C@@]2([H])[C@]3([H])[C@@H](O)C[C@]4([H])C[C@H](O)CC[C@]4(C)[C@@]3([H])CC[C@]12C)[C@H](C)CCC(O)=O	quantified	C24H40O4	392.293	5	Metabolite
HMDB0000947	undecanoic acid	Undecanoic acid	CCCCCCCCCCC(O)=O	detected	C11H22O2	186.162	1	Metabolite
HMDB0000949	2-hydroxy-1-[(2S,5R,14R,15S,17S)-5,14,17-trihydroxy-2,15-dimethyltetracyclo[8.7.0.0?7.0????????,?]heptadecan-14-yl]ethan-1-one	Tetrahydrocortisol	C[C@]12C[C@H](O)C3C(CCC4C[C@H](O)CC[C@]34C)C1CC[C@]2(O)C(=O)CO	quantified	C21H34O5	366.241	5	Metabolite
HMDB0000950	N-[(2S,3R,4E)-1,3-dihydroxyoctadec-4-en-2-yl]tricosanamide	Cer(d18:1/23:0)	CCCCCCCCCCCCCCCCCCCCCCC(=O)N[C@@H](CO)[C@H](O)\C=C\CCCCCCCCCCCCC	quantified	C41H81N1O3	635.622	2	Metabolite
HMDB0000951	2-[(4R)-4-[(1S,2S,5R,7S,9R,10R,11S,14R,15R)-5,9-dihydroxy-2,15-dimethyltetracyclo[8.7.0.0?7.0????????,?]heptadecan-14-yl]pentanamido]ethane-1-sulfonic acid	Taurochenodesoxycholic acid	[H][C@@]1(CC[C@@]2([H])[C@]3([H])[C@H](O)C[C@]4([H])C[C@H](O)CC[C@]4(C)[C@@]3([H])CC[C@]12C)[C@H](C)CCC(=O)NCCS(O)(=O)=O	quantified	C26H45N1O6S1	499.297	5	Metabolite
HMDB0000953	7-[(carboxymethyl)carbamoyl]heptanoic acid	Suberylglycine	OC(=O)CCCCCCC(=O)NCC(O)=O	quantified	C10H17N1O5	231.111	3	Metabolite
HMDB0000954	(2E)-3-(4-hydroxy-3-methoxyphenyl)prop-2-enoic acid	trans-Ferulic acid	COC1=C(O)C=CC(\C=C\C(O)=O)=C1	quantified	C10H10O4	194.058	6	Metabolite
HMDB0000955	(2E)-3-(3-hydroxy-4-methoxyphenyl)prop-2-enoic acid	Isoferulic acid	COC1=C(O)C=C(\C=C\C(O)=O)C=C1	quantified	C10H10O4	194.058	6	Metabolite
HMDB0000956	(2R,3R)-2,3-dihydroxybutanedioic acid	Tartaric acid	O[C@H]([C@@H](O)C(O)=O)C(O)=O	quantified	C4H6O6	150.016	2	Metabolite
HMDB0000957	benzene-1,2-diol	Pyrocatechol	OC1=CC=CC=C1O	quantified	C6H6O2	110.037	4	Metabolite
HMDB0000958	(1E)-prop-1-ene-1,2,3-tricarboxylic acid	trans-Aconitic acid	OC(=O)C\C(=C/C(O)=O)C(O)=O	quantified	C6H6O6	174.016	4	Metabolite
HMDB0000959	2-[(2E)-2-methylbut-2-enamido]acetic acid	Tiglylglycine	C\C=C(/C)C(=O)NCC(O)=O	quantified	C7H11N1O3	157.074	3	Metabolite
HMDB0000960	[({[(2R,3S,5R)-5-(2-amino-6-oxo-6,9-dihydro-1H-purin-9-yl)-3-hydroxyoxolan-2-yl]methoxy}(hydroxy)phosphoryl)oxy]phosphonic acid	dGDP	NC1=NC2=C(N=CN2[C@H]2C[C@H](O)[C@@H](COP(O)(=O)OP(O)(O)=O)O2)C(=O)N1	expected	C10H15N5O10P2	427.029	7	Metabolite
HMDB0000961	{[hydroxy({[(2E,6E)-3,7,11-trimethyldodeca-2,6,10-trien-1-yl]oxy})phosphoryl]oxy}phosphonic acid	Farnesyl pyrophosphate	[H]OP(=O)(O[H])OP(=O)(O[H])OC\C=C(/C)CC\C=C(/C)CCC=C(C)C	quantified	C15H28O7P2	382.131	3	Metabolite
HMDB0000962	5-(1,2-dithiolan-3-yl)pentanamide	Lipoamide	NC(=O)CCCCC1CCSS1	quantified	C8H15N1O1S2	205.06	2	Metabolite
HMDB0000963	{[(3R,4S)-3,4-dihydroxy-5-[(methylsulfanyl)methyl]oxolan-2-yl]oxy}phosphonic acid	5-Methylthioribose 1-phosphate	CSCC1OC(OP(O)(O)=O)[C@H](O)[C@@H]1O	expected	C6H13O7P1S1	260.012	1	Metabolite
HMDB0000965	2-aminoethane-1-sulfinic acid	Hypotaurine	NCCS(O)=O	quantified	C2H7N1O2S1	109.02	0	Metabolite
HMDB0000968	{[(1R,2R,3R,4R,5S,6R)-2,3,5,6-tetrahydroxy-4-(phosphonooxy)cyclohexyl]oxy}phosphonic acid	1D-Myo-inositol 1,4-bisphosphate	O[C@H]1[C@@H](O)[C@@H](OP(O)(O)=O)[C@H](O)[C@@H](O)[C@@H]1OP(O)(O)=O	expected	C6H14O12P2	339.996	1	Metabolite
HMDB0000969	(3R,5S)-5-[(2R)-2-[(1R,3aS,4E,7aR)-4-{2-[(1Z,3S,5R)-3,5-dihydroxy-2-methylidenecyclohexylidene]ethylidene}-7a-methyl-octahydro-1H-inden-1-yl]propyl]-3-hydroxy-3-methyloxolan-2-one	1,25-Dihydroxyvitamin D3-26,23-lactone	[H][C@@]1(CC[C@@]2([H])\C(CCC[C@]12C)=C\C=C1\C[C@@H](O)C[C@H](O)C1=C)[C@H](C)C[C@H]1C[C@@](C)(O)C(=O)O1	expected	C27H40O5	444.288	8	Metabolite
HMDB0000972	(2S)-2-[(4-{N-[(2-amino-4-oxo-1,4,5,6,7,8-hexahydropteridin-6-yl)methyl]formamido}phenyl)formamido]pentanedioic acid	10-Formyltetrahydrofolate	NC1=NC(=O)C2=C(NCC(CN(C=O)C3=CC=C(C=C3)C(=O)N[C@@H](CCC(O)=O)C(O)=O)N2)N1	expected	C20H23N7O7	473.166	13	Metabolite
HMDB0000973	phosphoric acid	Hydrogen phosphate	OP(O)(O)=O	expected	H3O4P1	97.9769	0	Adduct
HMDB0000975	(2R,3S,4S,5R,6R)-2-(hydroxymethyl)-6-{[(2R,3R,4S,5S,6R)-3,4,5-trihydroxy-6-(hydroxymethyl)oxan-2-yl]oxy}oxane-3,4,5-triol	Trehalose	OC[C@H]1O[C@H](O[C@H]2O[C@H](CO)[C@@H](O)[C@H](O)[C@H]2O)[C@H](O)[C@@H](O)[C@@H]1O	quantified	C12H22O11	342.116	2	Metabolite
HMDB0000977	3-[(2E,6E,10E,14E,18E)-3,7,11,15,19,23-hexamethyltetracosa-2,6,10,14,18,22-hexaen-1-yl]-4-hydroxy-5-methoxybenzoic acid	3-Hexaprenyl-4-hydroxy-5-methoxybenzoic acid	COC1=CC(=CC(C\C=C(/C)CC\C=C(/C)CC\C=C(/C)CC\C=C(/C)CC\C=C(/C)CCC=C(C)C)=C1O)C(O)=O	expected	C38H56O4	576.418	11	Metabolite
HMDB0000978	4-(2-aminophenyl)-2,4-dioxobutanoic acid	4-(2-Aminophenyl)-2,4-dioxobutanoic acid	NC1=C(C=CC=C1)C(=O)CC(=O)C(O)=O	detected	C10H9N1O4	207.053	7	Metabolite
HMDB0000980	{[({[(2R,3S)-3-(2-amino-4-oxo-3,4,7,8-tetrahydropteridin-6-yl)-2,3-dihydroxypropoxy](hydroxy)phosphoryl}oxy)(hydroxy)phosphoryl]oxy}phosphonic acid	Dihydroneopterin triphosphate	NC1=NC2=C(N=C(CN2)[C@H](O)[C@H](O)COP(O)(=O)OP(O)(=O)OP(O)(O)=O)C(=O)N1	expected	C9H16N5O13P3	494.996	6	Metabolite
HMDB0000981	(2S,6S,7S,11R,14R,15R)-2,6,15-trimethyl-14-[(2R)-6-methylhept-5-en-2-yl]tetracyclo[8.7.0.0?7.0????????,?]heptadec-1(10)-en-5-one	4a-Methyl-5a-cholesta-8,24-dien-3-one	[H][C@@]1(CC[C@@]2([H])C3=C(CC[C@]12C)[C@@]1(C)CCC(=O)[C@@H](C)[C@]1([H])CC3)[C@H](C)CCC=C(C)C	expected	C28H44O1	396.339	7	Metabolite
HMDB0000982	4-amino-1-[(2R,3R,4S,5R)-3,4-dihydroxy-5-(hydroxymethyl)oxolan-2-yl]-5-methyl-1,2-dihydropyrimidin-2-one	5-Methylcytidine	CC1=CN([C@@H]2O[C@H](CO)[C@@H](O)[C@H]2O)C(=O)N=C1N	quantified	C10H15N3O5	257.101	5	Metabolite
HMDB0000985	6,8-disulfanyloctanimidic acid	Dihydrolipoamide	OC(=N)CCCCC(S)CCS	expected	C8H17N1O1S2	207.075	1	Metabolite
HMDB0000988	{[(2S,3S,4R,5R)-5-(6-amino-9H-purin-9-yl)-3,4-dihydroxyoxolan-2-yl]methyl}(3-aminopropyl)methylsulfanium	S-Adenosylmethioninamine	C[S+](CCCN)C[C@H]1O[C@H]([C@H](O)[C@@H]1O)N1C=NC2=C1N=CN=C2N	expected	C14H22N6O3S1	354.147	7	Metabolite
HMDB0000990	acetaldehyde	Acetaldehyde	CC=O	quantified	C2H4O1	44.0262	1	Metabolite
HMDB0000991	2-aminooctanoic acid	DL-2-Aminooctanoic acid	CCCCCCC(N)C(O)=O	detected	C8H17N1O2	159.126	1	Metabolite
HMDB0000992	4-oxo-4-(pyridin-3-yl)butanoic acid	3-Succinoylpyridine	OC(=O)CCC(=O)C1=CC=CN=C1	expected	C9H9N1O3	179.058	6	Metabolite
HMDB0000994	{[(2S,3S,4S,5S,6R)-3,4,5-trihydroxy-6-(hydroxymethyl)oxan-2-yl]oxy}phosphonic acid	Dolichyl phosphate D-mannose	OC[C@H]1O[C@@H](OP(O)(O)=O)[C@@H](O)[C@@H](O)[C@@H]1O	expected	C6H13O9P1	260.03	1	Metabolite
HMDB0000995	(1S,2R,10R,11S,15S)-14-acetyl-2,15-dimethyltetracyclo[8.7.0.0?7.0????????,?]heptadeca-6,13-dien-5-one	16-Dehydroprogesterone	[H][C@@]12CC=C(C(C)=O)[C@@]1(C)CC[C@@]1([H])[C@@]2([H])CCC2=CC(=O)CC[C@]12C	expected	C21H28O2	312.209	8	Metabolite
HMDB0000996	(2R)-2-amino-3-sulfonylpropanoic acid	3-Sulfinoalanine	N[C@@H](CS(=O)=O)C(O)=O	quantified	C3H7N1O4S1	153.01	1	Metabolite
HMDB0000998	({[({[(2R,3S,5R)-5-(4-amino-2-oxo-1,2-dihydropyrimidin-1-yl)-3-hydroxyoxolan-2-yl]methoxy}(hydroxy)phosphoryl)oxy](hydroxy)phosphoryl}oxy)phosphonic acid	dCTP	NC1=NC(=O)N(C=C1)[C@H]1C[C@H](O)[C@@H](COP(O)(=O)OP(O)(=O)OP(O)(O)=O)O1	quantified	C9H16N3O13P3	466.99	5	Metabolite
HMDB0000999	{[(2R,3S,4R,5R)-3,4-dihydroxy-5-(2-formamidoethanimidamido)oxolan-2-yl]methoxy}phosphonic acid	Phosphoribosylformylglycineamidine	O[C@H]1[C@@H](O)[C@H](NC(=N)CNC=O)O[C@@H]1COP(O)(O)=O	expected	C8H16N3O8P1	313.068	3	Metabolite
HMDB0001000	[({[(2R,3S,5R)-5-(2,4-dioxo-1,2,3,4-tetrahydropyrimidin-1-yl)-3-hydroxyoxolan-2-yl]methoxy}(hydroxy)phosphoryl)oxy]phosphonic acid	dUDP	O[C@H]1C[C@@H](O[C@@H]1COP(O)(=O)OP(O)(O)=O)N1C=CC(=O)NC1=O	quantified	C9H14N2O11P2	388.007	5	Metabolite
HMDB0001003	[({[(2R,3S,4R,5R)-5-(6-amino-9H-purin-9-yl)-3,4-dihydroxyoxolan-2-yl]methoxy}(hydroxy)phosphoryl)oxy]sulfonic acid	Adenosine phosphosulfate	NC1=NC=NC2=C1N=CN2[C@@H]1O[C@H](COP(O)(=O)OS(O)(=O)=O)[C@@H](O)[C@H]1O	expected	C10H14N5O10P1S1	427.02	7	Metabolite
HMDB0001004	N-methyl-4-oxo-4-(pyridin-3-yl)butanamide	Oxoamide	CNC(=O)CCC(=O)C1=CN=CC=C1	expected	C10H12N2O2	192.09	6	Metabolite
HMDB0001005	(2S)-2-(carbamoylamino)-2-hydroxyacetic acid	(S)-Ureidoglycolic acid	NC(=O)N[C@@H](O)C(O)=O	expected	C3H6N2O4	134.033	2	Metabolite
HMDB0001007	4-(pyridin-3-yl)butanoic acid	3-Pyridinebutanoic acid	OC(=O)CCCC1=CC=CN=C1	expected	C9H11N1O2	165.079	5	Metabolite
HMDB0001008	3-(2-{[(2Z)-3-(2-carboxyethyl)-5-{[(2Z)-4-ethenyl-3-methyl-5-oxo-2,5-dihydro-1H-pyrrol-2-ylidene]methyl}-4-methyl-2H-pyrrol-2-ylidene]methyl}-5-{[(2Z)-3-ethenyl-4-methyl-5-oxo-2,5-dihydro-1H-pyrrol-2-ylidene]methyl}-4-methyl-1H-pyrrol-3-yl)propanoic acid	Biliverdin	CC1=C(C=C)\C(NC1=O)=C\C1=C(C)C(CCC(O)=O)=C(N1)\C=C1/N=C(/C=C2\NC(=O)C(C=C)=C2C)C(C)=C1CCC(O)=O	detected	C33H34N4O6	582.248	19	Metabolite
HMDB0001009	1-methyl-3-(1-methylpyrrolidin-2-yl)pyridin-1-ium	N-Methylnicotinium	CN1CCCC1C1=CC=C[N+](C)=C1	expected	C11H16N2	176.131	5	Metabolite
HMDB0001010	1-methyl-2-(pyridin-3-yl)-3,4-dihydro-2H-pyrrol-1-ium	Nicotine imine	C[N+]1=CCCC1C1=CC=CN=C1	expected	C10H12N2	160.1	6	Metabolite
HMDB0001011	{[(2R,3S,4R,5R)-5-(6-amino-9H-purin-9-yl)-4-hydroxy-2-({[hydroxy({[hydroxy(3-hydroxy-2,2-dimethyl-3-{[2-({2-[(2-methylprop-2-enoyl)sulfanyl]ethyl}carbamoyl)ethyl]carbamoyl}propoxy)phosphoryl]oxy})phosphoryl]oxy}methyl)oxolan-3-yl]oxy}phosphonic acid	Methacrylyl-CoA	CC(=C)C(=O)SCCNC(=O)CCNC(=O)C(O)C(C)(C)COP(O)(=O)OP(O)(=O)OC[C@H]1O[C@H]([C@H](O)[C@@H]1OP(O)(O)=O)N1C=NC2=C1N=CN=C2N	expected	C25H40N7O17P3S1	835.141	11	Metabolite
HMDB0001013	1-(6-carboxylato-3,4,5-trihydroxyoxan-2-yl)-3-(1-methyl-5-oxopyrrolidin-2-yl)-1<U+03BB>5-pyridin-1-ylium	Cotinine glucuronide	CN1C(CCC1=O)C1=C[N+](=CC=C1)C1OC(C(O)C(O)C1O)C([O-])=O	expected	C16H20N2O7	352.127	8	Metabolite
HMDB0001014	3-(5-oxo-4,5-dihydro-1H-imidazol-4-yl)propanoic acid	4-Imidazolone-5-propionic acid	OC(=O)CCC1N=CNC1=O	expected	C6H8N2O3	156.053	4	Metabolite
HMDB0001015	(2R)-2-formamido-4-(methylsulfanyl)butanoic acid	N-Formyl-L-methionine	CSCC[C@@H](NC=O)C(O)=O	quantified	C6H11N1O3S1	177.046	2	Metabolite
HMDB0001016	3-{2-hydroxy-3-methyl-3-[(phosphonooxy)methyl]butanamido}propanoic acid	D-4'-Phosphopantothenate	CC(C)(COP(O)(O)=O)C(O)C(=O)NCCC(O)=O	expected	C9H18N1O8P1	299.077	2	Metabolite
HMDB0001018	{[(2R,3S,4R)-5-(2,4-dioxo-1,2,3,4-tetrahydropyrimidin-1-yl)-3,4-dihydroxyoxolan-2-yl]methoxy}({[hydroxy({[(3R,4S,5R)-3,4,5-trihydroxyoxan-2-yl]oxy})phosphoryl]oxy})phosphinic acid	UDP-D-Xylose	O[C@@H]1[C@@H](COP(O)(=O)OP(O)(=O)OC2OC[C@@H](O)[C@H](O)[C@H]2O)OC([C@@H]1O)N1C=CC(=O)NC1=O	expected	C14H22N2O16P2	536.044	6	Metabolite
HMDB0001020	N,N-dimethylaniline	N,N-Dimethylaniline	CN(C)C1=CC=CC=C1	expected	C8H11N1	121.089	4	Metabolite
HMDB0001021	(2S)-4-{[2-(3-{3-[({[({[(2R,3S,4R,5R)-5-(6-amino-9H-purin-9-yl)-4-hydroxy-3-(phosphonooxy)oxolan-2-yl]methoxy}(hydroxy)phosphoryl)oxy](hydroxy)phosphoryl}oxy)methyl]-2-hydroxy-3-methylbutanamido}propanamido)ethyl]sulfanyl}-2-hydroxy-4-oxobutanoic acid	Malyl-CoA	CC(C)(COP(O)(=O)OP(O)(=O)OC[C@H]1O[C@H]([C@H](O)[C@@H]1OP(O)(O)=O)N1C=NC2=C1N=CN=C2N)C(O)C(=O)NCCC(=O)NCCSC(=O)C[C@H](O)C(O)=O	expected	C25H40N7O20P3S1	883.126	11	Metabolite
HMDB0001022	4-{[2-(3-{3-[({[({[(2R,3S,4R,5R)-5-(6-amino-9H-purin-9-yl)-4-hydroxy-3-(phosphonooxy)oxolan-2-yl]methoxy}(hydroxy)phosphoryl)oxy](hydroxy)phosphoryl}oxy)methyl]-2-hydroxy-3-methylbutanamido}propanamido)ethyl]sulfanyl}-4-oxobutanoic acid	Succinyl-CoA	CC(C)(COP(O)(=O)OP(O)(=O)OC[C@H]1O[C@H]([C@H](O)[C@@H]1OP(O)(O)=O)N1C=NC2=C1N=CN=C2N)C(O)C(=O)NCCC(=O)NCCSC(=O)CCC(O)=O	expected	C25H40N7O19P3S1	867.131	11	Metabolite
HMDB0001023	(2S,5S,7R,14R,15R)-2,6,6,15-tetramethyl-14-[(2R)-6-methylhept-5-en-2-yl]tetracyclo[8.7.0.0?7.0????????,?]heptadeca-1(10),11-dien-5-ol	4,4-Dimethylcholesta-8,14,24-trienol	[H][C@@]1(CC=C2C3=C(CC[C@]12C)[C@@]1(C)CC[C@H](O)C(C)(C)[C@]1([H])CC3)[C@H](C)CCC=C(C)C	expected	C29H46O1	410.355	7	Metabolite
HMDB0001024	2-oxo-3-(phosphonooxy)propanoic acid	Phosphohydroxypyruvic acid	OC(=O)C(=O)COP(O)(O)=O	expected	C3H5O7P1	183.977	2	Metabolite
HMDB0001028	(1S,2R,5S,10S,11S,14R,15R)-14-[(2R)-5-(dimethylamino)pentan-2-yl]-2,15-dimethyltetracyclo[8.7.0.0?7.0????????,?]heptadec-7-en-5-ol	25-Azacholesterol	[H][C@@]1(CC[C@@]2([H])[C@]3([H])CC=C4C[C@@H](O)CC[C@]4(C)[C@@]3([H])CC[C@]12C)[C@H](C)CCCN(C)C	expected	C26H45N1O1	387.35	5	Metabolite
HMDB0001030	(2R,3S,5S,6S)-3,5-dihydroxy-2-(hydroxymethyl)-6-{[(2R,3S,4R,5R)-4,5,6-trihydroxy-2-(hydroxymethyl)oxan-3-yl]oxy}oxan-4-one	3'-Ketolactose	OC[C@H]1O[C@@H](O[C@H]2[C@H](O)[C@@H](O)C(O)O[C@@H]2CO)[C@H](O)C(=O)[C@H]1O	expected	C12H20O11	340.101	3	Metabolite
HMDB0001031	{[(2R,3S,5R)-3,5-dihydroxyoxolan-2-yl]methoxy}phosphonic acid	Deoxyribose 5-phosphate	O[C@H]1C[C@H](O)[C@@H](COP(O)(O)=O)O1	expected	C5H11O7P1	214.024	1	Metabolite
HMDB0001032	[(1S,2R,5S,10R,11S,15S)-2,15-dimethyl-14-oxotetracyclo[8.7.0.0^{2,7}.0^{11,15}]heptadec-7-en-5-yl]oxidanesulfonic acid	Dehydroepiandrosterone sulfate	[H][C@@]12CCC(=O)[C@@]1(C)CC[C@@]1([H])[C@@]2([H])CC=C2C[C@H](CC[C@]12C)OS(O)(=O)=O	quantified	C19H28O5S1	368.166	6	Metabolite
HMDB0001033	sulfurous acid	Hydrogen sulfite	OS(O)=O	expected	H2O3S1	81.9725	0	Adduct
HMDB0001035	(3S)-3-amino-3-{[(1S)-1-{[(1S)-1-{[(1S)-1-{[(1S,2S)-1-{[(2S)-1-[(2S)-2-{[(1S)-1-carboxy-2-phenylethyl]carbamoyl}pyrrolidin-1-yl]-3-(1H-imidazol-5-yl)-1-oxopropan-2-yl]carbamoyl}-2-methylbutyl]carbamoyl}-2-(4-hydroxyphenyl)ethyl]carbamoyl}-2-methylpropyl]carbamoyl}-4-[(diaminomethylidene)amino]butyl]carbamoyl}propanoic acid	Angiotensin II	CC[C@H](C)[C@H](NC(=O)[C@H](CC1=CC=C(O)C=C1)NC(=O)[C@@H](NC(=O)[C@H](CCCN=C(N)N)NC(=O)[C@@H](N)CC(O)=O)C(C)C)C(=O)N[C@@H](CC1=CN=CN1)C(=O)N1CCC[C@H]1C(=O)N[C@@H](CC1=CC=CC=C1)C(O)=O	quantified	C50H71N13O12	1045.53	22	Metabolite
HMDB0001036	(2S)-2-{[(2S)-1-[(2S)-2-[(2S,3S)-2-[(2S)-2-[(2S)-2-[(2S)-2-amino-5-[(diaminomethylidene)amino]pentanamido]-3-methylbutanamido]-3-(4-hydroxyphenyl)propanamido]-3-methylpentanamido]-3-(1H-imidazol-5-yl)propanoyl]pyrrolidin-2-yl]formamido}-3-phenylpropanoic acid	Angiotensin III	CC[C@H](C)[C@H](NC(=O)[C@H](CC1=CC=C(O)C=C1)NC(=O)[C@@H](NC(=O)[C@@H](N)CCCN=C(N)N)C(C)C)C(=O)N[C@@H](CC1=CN=CN1)C(=O)N1CCC[C@H]1C(=O)N[C@@H](CC1=CC=CC=C1)C(O)=O	quantified	C46H66N12O9	930.508	20	Metabolite
HMDB0001038	(2S)-2-{[(2S)-1-[(2S)-2-[(2S,3S)-2-[(2S)-2-[(2S)-2-amino-3-methylbutanamido]-3-(4-hydroxyphenyl)propanamido]-3-methylpentanamido]-3-(1H-imidazol-5-yl)propanoyl]pyrrolidin-2-yl]formamido}-3-phenylpropanoic acid	Angiotensin IV	CC[C@H](C)[C@H](NC(=O)[C@H](CC1=CC=C(O)C=C1)NC(=O)[C@@H](N)C(C)C)C(=O)N[C@@H](CC1=CN=CN1)C(=O)N1CCC[C@H]1C(=O)N[C@@H](CC1=CC=CC=C1)C(O)=O	expected	C40H54N8O8	774.406	18	Metabolite
HMDB0001041	{[(2R,3S,4R,5R)-5-(6-amino-9H-purin-9-yl)-4-hydroxy-2-({[hydroxy({[hydroxy(3-hydroxy-2,2-dimethyl-3-{[2-({2-[(2-methylbutanoyl)sulfanyl]ethyl}carbamoyl)ethyl]carbamoyl}propoxy)phosphoryl]oxy})phosphoryl]oxy}methyl)oxolan-3-yl]oxy}phosphonic acid	2-Methylbutyryl-CoA	CCC(C)C(=O)SCCNC(=O)CCNC(=O)C(O)C(C)(C)COP(O)(=O)OP(O)(=O)OC[C@H]1O[C@H]([C@H](O)[C@@H]1OP(O)(O)=O)N1C=NC2=C1N=CN=C2N	expected	C26H44N7O17P3S1	851.173	10	Metabolite
HMDB0001043	(5Z,8Z,11Z,14Z)-icosa-5,8,11,14-tetraenoic acid	Arachidonic acid	CCCCC\C=C/C\C=C/C\C=C/C\C=C/CCCC(O)=O	quantified	C20H32O2	304.24	5	Metabolite
HMDB0001044	{[(2R,3S,5R)-5-(2-amino-6-oxo-6,9-dihydro-3H-purin-9-yl)-3-hydroxyoxolan-2-yl]methoxy}phosphonic acid	2'-Deoxyguanosine 5'-monophosphate	NC1=NC(=O)C2=C(N1)N(C=N2)[C@H]1C[C@H](O)[C@@H](COP(O)(O)=O)O1	expected	C10H14N5O7P1	347.063	7	Metabolite
HMDB0001045	(2S)-2-[(2S)-2-(2-{2-[(2S)-2-amino-3-(4-hydroxyphenyl)propanamido]acetamido}acetamido)-3-phenylpropanamido]-4-methylpentanoic acid	Enkephalin L	CC(C)C[C@H](NC(=O)[C@H](CC1=CC=CC=C1)NC(=O)CNC(=O)CNC(=O)[C@@H](N)CC1=CC=C(O)C=C1)C(O)=O	quantified	C28H37N5O7	555.269	13	Metabolite
HMDB0001046	1-methyl-5-(pyridin-3-yl)pyrrolidin-2-one	Cotinine	CN1C(CCC1=O)C1=CN=CC=C1	quantified	C10H12N2O1	176.095	6	Metabolite
HMDB0001047	{[(2R,3S,4S,5S)-3,4-dihydroxy-5-(hydroxymethyl)-5-(phosphonooxy)oxolan-2-yl]methoxy}phosphonic acid	D-Fructose 2,6-bisphosphate	OC[C@@]1(OP(O)(O)=O)O[C@H](COP(O)(O)=O)[C@@H](O)[C@@H]1O	expected	C6H14O12P2	339.996	1	Metabolite
HMDB0001049	(2S)-2-amino-4-{[(1R)-1-carboxy-2-sulfanylethyl]carbamoyl}butanoic acid	gamma-Glutamylcysteine	N[C@@H](CCC(=O)N[C@@H](CS)C(O)=O)C(O)=O	quantified	C8H14N2O5S1	250.062	3	Metabolite
HMDB0001050	hypochlorous acid	Hypochlorite	OCl	expected	Cl1H1O1	51.9716	0	Adduct
HMDB0001051	2,3-dihydroxypropanal	Glyceraldehyde	OCC(O)C=O	quantified	C3H6O3	90.0317	1	Metabolite
HMDB0001052	{[5-(6-amino-9H-purin-9-yl)-4-hydroxy-2-({[hydroxy({[hydroxy(3-hydroxy-3-{[2-({2-[(3-hydroxy-2-methylpropanoyl)sulfanyl]ethyl}carbamoyl)ethyl]carbamoyl}-2,2-dimethylpropoxy)phosphoryl]oxy})phosphoryl]oxy}methyl)oxolan-3-yl]oxy}phosphonic acid	(S)-3-Hydroxyisobutyryl-CoA	CC(CO)C(=O)SCCNC(=O)CCNC(=O)C(O)C(C)(C)COP(O)(=O)OP(O)(=O)OCC1OC(C(O)C1OP(O)(O)=O)N1C=NC2=C(N)N=CN=C12	expected	C25H42N7O18P3S1	853.152	10	Metabolite
HMDB0001054	{[(2S,3R,4S,5S,6R)-3,4,5-trihydroxy-6-(hydroxymethyl)oxan-2-yl]oxy}({[(6Z)-3,7,11-trimethyldodeca-6,10-dien-1-yl]oxy})phosphinic acid	Dolichyl b-D-glucosyl phosphate	OC[C@H]1O[C@@H](OP(=O)(O)OCCC(C)CC\C=C(\C)CCC=C(C)C)[C@H](O)[C@@H](O)[C@@H]1O	expected	C21H39O9P1	466.233	3	Metabolite
HMDB0001056	(2S)-2-[(4-{[(2-amino-4-oxo-3,4,7,8-tetrahydropteridin-6-yl)methyl]amino}phenyl)formamido]pentanedioic acid	Dihydrofolic acid	NC1=NC2=C(N=C(CNC3=CC=C(C=C3)C(=O)N[C@@H](CCC(O)=O)C(O)=O)CN2)C(=O)N1	quantified	C19H21N7O6	443.155	13	Metabolite
HMDB0001057	(3E)-5-{[2-(3-{3-[({[({[5-(6-amino-9H-purin-9-yl)-4-hydroxy-3-(phosphonooxy)oxolan-2-yl]methoxy}(hydroxy)phosphoryl)oxy](hydroxy)phosphoryl}oxy)methyl]-2-hydroxy-3-methylbutanamido}propanamido)ethyl]sulfanyl}-3-methyl-5-oxopent-3-enoic acid	3-Methylglutaconyl-CoA	C\C(CC(O)=O)=C/C(=O)SCCNC(=O)CCNC(=O)C(O)C(C)(C)COP(O)(=O)OP(O)(=O)OCC1OC(C(O)C1OP(O)(O)=O)N1C=NC2=C(N)N=CN=C12	expected	C27H42N7O19P3S1	893.147	12	Metabolite
HMDB0001058	{[(2S,3S,4S,5R)-2,3,4-trihydroxy-5-[(phosphonooxy)methyl]oxolan-2-yl]methoxy}phosphonic acid	Fructose 1,6-bisphosphate	O[C@H]1[C@H](O)[C@](O)(COP(O)(O)=O)O[C@@H]1COP(O)(O)=O	quantified	C6H14O12P2	339.996	1	Metabolite
HMDB0001059	{[(2S,3R,5S,6S)-2,6-dihydroxy-3,4,5-tris(phosphonooxy)cyclohexyl]oxy}phosphonic acid	Inositol 1,3,4,5-tetraphosphate	O[C@H]1C(OP(O)(O)=O)[C@H](O)[C@@H](OP(O)(O)=O)C(OP(O)(O)=O)[C@H]1OP(O)(O)=O	expected	C6H16O18P4	499.929	1	Metabolite
HMDB0001060	2,3-dimethoxy-5-methyl-6-[(2E,6E,10E,14E,18E,22E,26E)-3,7,11,15,19,23,27,31-octamethyldotriaconta-2,6,10,14,18,22,26,30-octaen-1-yl]benzene-1,4-diol	Ubiquinol 8	COC1=C(OC)C(O)=C(C\C=C(/C)CC\C=C(/C)CC\C=C(/C)CC\C=C(/C)CC\C=C(/C)CC\C=C(/C)CC\C=C(/C)CCC=C(C)C)C(C)=C1O	quantified	C49H76O4	728.574	12	Metabolite
HMDB0001061	trihydroxyiodanediium	Iodate	O[I++](O)O	expected	H1I1O3	175.897	0	Adduct
HMDB0001062	{[(2R,3S,4R,5R)-5-acetamido-3,4,6-trihydroxyoxan-2-yl]methoxy}phosphonic acid	N-Acetyl-D-Glucosamine 6-Phosphate	CC(=O)N[C@H]1C(O)O[C@H](COP(O)(O)=O)[C@@H](O)[C@@H]1O	quantified	C8H16N1O9P1	301.056	2	Metabolite
HMDB0001063	3-[(2E,6E,10E,14E,18E)-3,7,11,15,19,23-hexamethyltetracosa-2,6,10,14,18,22-hexaen-1-yl]-4,5-dihydroxybenzoic acid	3-Hexaprenyl-4,5-Dihydroxybenzoic acid	CC(C)=CCC\C(C)=C\CC\C(C)=C\CC\C(C)=C\CC\C(C)=C\CC\C(C)=C\CC1=C(O)C(O)=CC(=C1)C(O)=O	expected	C37H54O4	562.402	11	Metabolite
HMDB0001064	{[5-(6-amino-9H-purin-9-yl)-4-hydroxy-2-({[hydroxy({[hydroxy(3-hydroxy-2,2-dimethyl-3-{[2-({2-[(9E,12E)-octadeca-9,12-dienoylsulfanyl]ethyl}carbamoyl)ethyl]carbamoyl}propoxy)phosphoryl]oxy})phosphoryl]oxy}methyl)oxolan-3-yl]oxy}phosphonic acid	Linoleoyl-CoA	CCCCC\C=C\C\C=C\CCCCCCCC(=O)SCCNC(=O)CCNC(=O)C(O)C(C)(C)COP(O)(=O)OP(O)(=O)OCC1OC(C(O)C1OP(O)(O)=O)N1C=NC2=C(N)N=CN=C12	expected	C39H66N7O17P3S1	1029.34	12	Metabolite
HMDB0001065	2-amino-1-phenylethan-1-ol	2-Hydroxyphenethylamine	NCC(O)C1=CC=CC=C1	quantified	C8H11N1O1	137.084	4	Metabolite
HMDB0001066	(2S)-2-amino-4-{[(1R)-1-[(carboxymethyl)carbamoyl]-2-{[(2R)-2-hydroxypropanoyl]sulfanyl}ethyl]carbamoyl}butanoic acid	S-Lactoylglutathione	C[C@@H](O)C(=O)SC[C@H](NC(=O)CC[C@H](N)C(O)=O)C(=O)NCC(O)=O	expected	C13H21N3O8S1	379.105	5	Metabolite
HMDB0001067	2-(3-carboxy-2-acetamidopropanamido)pentanedioic acid	N-Acetylaspartylglutamic acid	CC(=O)NC(CC(O)=O)C(=O)NC(CCC(O)=O)C(O)=O	quantified	C11H16N2O8	304.091	5	Metabolite
HMDB0001068	{[(2R,3S,4R,5S)-3,4,5,6-tetrahydroxy-6-(hydroxymethyl)oxan-2-yl]methoxy}phosphonic acid	D-Sedoheptulose 7-phosphate	OCC1(O)O[C@H](COP(O)(O)=O)[C@@H](O)[C@@H](O)[C@@H]1O	quantified	C7H15O10P1	290.04	1	Metabolite
HMDB0001069	2-[6-amino-2-(phenylamino)-9H-purin-9-yl]-5-(hydroxymethyl)oxolane-3,4-diol	2-Phenylaminoadenosine	NC1=C2N=CN(C3OC(CO)C(O)C3O)C2=NC(NC2=CC=CC=C2)=N1	expected	C16H18N6O4	358.139	11	Metabolite
HMDB0001070	{[5-(6-amino-9H-purin-9-yl)-4-hydroxy-2-({[hydroxy({[hydroxy({3-hydroxy-2,2-dimethyl-3-[(2-{[2-(octanoylsulfanyl)ethyl]carbamoyl}ethyl)carbamoyl]propoxy})phosphoryl]oxy})phosphoryl]oxy}methyl)oxolan-3-yl]oxy}phosphonic acid	Octanoyl-CoA	CCCCCCCC(=O)SCCNC(=O)CCNC(=O)C(O)C(C)(C)COP(O)(=O)OP(O)(=O)OCC1OC(C(O)C1OP(O)(O)=O)N1C=NC2=C(N)N=CN=C12	expected	C29H50N7O17P3S1	893.22	10	Metabolite
HMDB0001072	2-[(2E,6E,10E,14E,18E,22E,26E,30E,34E)-3,7,11,15,19,23,27,31,35,39-decamethyltetraconta-2,6,10,14,18,22,26,30,34,38-decaen-1-yl]-5,6-dimethoxy-3-methylcyclohexa-2,5-diene-1,4-dione	Coenzyme Q10	COC1=C(OC)C(=O)C(C\C=C(/C)CC\C=C(/C)CC\C=C(/C)CC\C=C(/C)CC\C=C(/C)CC\C=C(/C)CC\C=C(/C)CC\C=C(/C)CC\C=C(/C)CCC=C(C)C)=C(C)C1=O	quantified	C59H90O4	862.684	15	Metabolite
HMDB0001076	{[(2R,3S,4S,5R)-2,3,4-trihydroxy-5-(hydroxymethyl)oxolan-2-yl]methoxy}phosphonic acid	Fructose 1-phosphate	OC[C@H]1O[C@](O)(COP(O)(O)=O)[C@@H](O)[C@@H]1O	expected	C6H13O9P1	260.03	1	Metabolite
HMDB0001078	{[(2R,3S,4S,5S,6R)-3,4,5,6-tetrahydroxyoxan-2-yl]methoxy}phosphonic acid	Mannose 6-phosphate	O[C@@H]1O[C@H](COP(O)(O)=O)[C@@H](O)[C@H](O)[C@@H]1O	detected	C6H13O9P1	260.03	1	Metabolite
HMDB0001080	4-aminobutanal	4-Aminobutyraldehyde	NCCCC=O	expected	C4H9N1O1	87.0684	1	Metabolite
HMDB0001081	(2R,4S,5R,6R)-5-acetamido-2-{[(2R,3R,4S,5R,6S)-6-{[(2R,3S,4R,5R,6R)-5-acetamido-4,6-dihydroxy-2-(hydroxymethyl)oxan-3-yl]oxy}-3,4,5-trihydroxyoxan-2-yl]methoxy}-4-hydroxy-6-[(1R,2R)-1,2,3-trihydroxypropyl]oxane-2-carboxylic acid	(N-acetylneuraminosyl(a2-6)lactosamine)	[H][C@]1(O[C@@](C[C@H](O)[C@H]1NC(C)=O)(OC[C@H]1O[C@@H](O[C@H]2[C@H](O)[C@@H](NC(C)=O)[C@H](O)O[C@@H]2CO)[C@H](O)[C@@H](O)[C@H]1O)C(O)=O)[C@H](O)[C@H](O)CO	quantified	C25H42N2O19	674.238	6	Metabolite
HMDB0001083	{[(2S,3S,4R,5R)-5-(6-amino-9H-purin-9-yl)-3,4-dihydroxyoxolan-2-yl]methyl}[(1R,2R,3S,4S,6Z,8S,9S,11Z,14S,18R,19R)-3,8-bis(carbamoylmethyl)-4,9,14,18-tetrakis(2-carboxyethyl)-19-(carboxymethyl)-2,3,6,8,13,13,16,18-octamethyl-20,21,22,23-tetraazapentacyclo[15.2.1.1^{2,5}.1^{7,10}.1^{12,15}]tricosa-5(23),6,10(22),11,15(21),16-hexaen-20-yl]cobaltylium	Adenosyl cobyrinic acid a,c diamide	[H][C@]12[C@H](CC(O)=O)[C@@](C)(CCC(O)=O)\C(N1[Co+]C[C@H]1O[C@H]([C@H](O)[C@@H]1O)N1C=NC3=C1N=CN=C3N)=C(C)\C1=N\C(=C/C3=N/C(=C(C)\C4=N[C@]2(C)[C@@](C)(CC(N)=O)[C@@H]4CCC(O)=O)/[C@@](C)(CC(N)=O)[C@@H]3CCC(O)=O)\C(C)(C)[C@@H]1CCC(O)=O	expected	C55Co1H72N11O15	1185.45	25.5	Metabolite
HMDB0001084	3,4,5,6-tetrahydropyridine-2-carboxylic acid	D-1-Piperideine-2-carboxylic acid	OC(=O)C1=NCCCC1	expected	C6H9N1O2	127.063	3	Metabolite
HMDB0001085	(5S,6E,8E,10E,12R,14Z)-5,12-dihydroxyicosa-6,8,10,14-tetraenoic acid	Leukotriene B4	CCCCC\C=C/C[C@@H](O)\C=C\C=C\C=C/[C@@H](O)CCCC(O)=O	quantified	C20H32O4	336.23	5	Metabolite
HMDB0001086	3-[9,14,20-tris(2-carboxyethyl)-5,10,15,19-tetrakis(carboxymethyl)-21,22,23,24-tetraazapentacyclo[16.2.1.1?6.18,????????.1????????,?]tetracosa-1(20),3,5,8,10,13,15,18-octaen-4-yl]propanoic acid	Uroporphyrinogen III	OC(=O)CCC1=C2CC3=C(CCC(O)=O)C(CC(O)=O)=C(CC4=C(CC(O)=O)C(CCC(O)=O)=C(CC5=C(CC(O)=O)C(CCC(O)=O)=C(CC(N2)=C1CC(O)=O)N5)N4)N3	expected	C40H44N4O16	836.275	21	Metabolite
HMDB0001087	(2R,3R,4S,5S)-5-[(methylsulfanyl)methyl]oxolane-2,3,4-triol	5-Methylthioribose	CSC[C@H]1O[C@@H](O)[C@H](O)[C@@H]1O	expected	C6H12O4S1	180.046	1	Metabolite
HMDB0001088	{[5-(6-amino-9H-purin-9-yl)-2-[({[({3-[(2-{[2-(butanoylsulfanyl)ethyl]carbamoyl}ethyl)carbamoyl]-3-hydroxy-2,2-dimethylpropoxy}(hydroxy)phosphoryl)oxy](hydroxy)phosphoryl}oxy)methyl]-4-hydroxyoxolan-3-yl]oxy}phosphonic acid	Butyryl-CoA	CCCC(=O)SCCNC(=O)CCNC(=O)C(O)C(C)(C)COP(O)(=O)OP(O)(=O)OCC1OC(C(O)C1OP(O)(O)=O)N1C=NC2=C1N=CN=C2N	expected	C25H42N7O17P3S1	837.157	10	Metabolite
HMDB0001090	(3R)-3-hydroxy-5-{[hydroxy(phosphonooxy)phosphoryl]oxy}-3-methylpentanoic acid	(S)-5-Diphosphomevalonic acid	C[C@@](O)(CCOP(O)(=O)OP(O)(O)=O)CC(O)=O	expected	C6H14O10P2	308.006	1	Metabolite
HMDB0001091	(3S,4R,6S)-3-ethenyl-6-[(R)-hydroxy(6-methoxyquinolin-4-yl)methyl]-1-azabicyclo[2.2.2]octan-3-ol	3-Hydroxyquinine	[H][C@]12CCN(C[C@]1(O)C=C)[C@@]([H])(C2)[C@H](O)C1=CC=NC2=CC=C(OC)C=C12	quantified	C20H24N2O3	340.179	10	Metabolite
HMDB0001093	(2S,11R,14R,15R)-2,15-dimethyl-14-[(2R)-6-methylhept-5-en-2-yl]tetracyclo[8.7.0.0?7.0????????,?]heptadec-1(10)-en-5-one	5a-Cholesta-8,24-dien-3-one	[H][C@@]12CC[C@H]([C@H](C)CCC=C(C)C)[C@@]1(C)CCC1=C2CCC2CC(=O)CC[C@]12C	expected	C27H42O1	382.324	7	Metabolite
HMDB0001094	{[hydroxy({[(2E,6E,10E,14E,18E,22E,26E)-3,7,11,15,19,23,27,31-octamethyldotriaconta-2,6,10,14,18,22,26,30-octaen-1-yl]oxy})phosphoryl]oxy}phosphonic acid	Octaprenyl diphosphate	CC(C)=CCC\C(C)=C\CC\C(C)=C\CC\C(C)=C\CC\C(C)=C\CC\C(C)=C\CC\C(C)=C\CC\C(C)=C\COP(O)(=O)OP(O)(O)=O	expected	C40H68O7P2	722.444	8	Metabolite
HMDB0001095	[({[(2R,3S,4R,5R)-5-(2-amino-6-oxo-6,9-dihydro-1H-purin-9-yl)-3,4-dihydroxyoxolan-2-yl]methoxy}(hydroxy)phosphoryl)oxy]({[(3S,4R,5S,6S)-3,4,5-trihydroxy-6-methyloxan-2-yl]oxy})phosphinic acid	GDP-L-fucose	C[C@@H]1OC(OP(O)(=O)OP(O)(=O)OC[C@H]2O[C@H]([C@H](O)[C@@H]2O)N2C=NC3=C2N=C(N)NC3=O)[C@@H](O)[C@H](O)[C@@H]1O	expected	C16H25N5O15P2	589.082	8	Metabolite
HMDB0001096	(carbamoyloxy)phosphonic acid	Carbamoyl phosphate	NC(=O)OP(O)(O)=O	quantified	C1H4N1O5P1	140.983	1	Adduct
HMDB0001097	3-[20-(2-carboxyethyl)-9,14-diethenyl-5,10,15,19-tetramethyl-21,22,23,24-tetraazapentacyclo[16.2.1.1^{3,6}.1^{8,11}.1^{13,16}]tetracosa-1(20),3,5,8,10,13,15,18-octaen-4-yl]propanoic acid	Protoporphyrinogen IX	CC1=C2CC3=C(C)C(C=C)=C(CC4=C(C)C(C=C)=C(CC5=C(C)C(CCC(O)=O)=C(CC(N2)=C1CCC(O)=O)N5)N4)N3	expected	C34H40N4O4	568.305	17	Metabolite
HMDB0001101	4-methoxybenzoic acid	p-Anisic acid	COC1=CC=C(C=C1)C(O)=O	detected	C8H8O3	152.047	5	Metabolite
HMDB0001104	N-[(2R,3R,4R,5S,6R)-2-amino-4,5-dihydroxy-6-(hydroxymethyl)oxan-3-yl]acetamide	N-Acetyl-b-glucosaminylamine	CC(=O)N[C@H]1[C@H](N)O[C@H](CO)[C@@H](O)[C@@H]1O	quantified	C8H16N2O5	220.106	2	Metabolite
HMDB0001106	3-aminopropanal	3-Aminopropionaldehyde	NCCC=O	expected	C3H7N1O1	73.0528	1	Metabolite
HMDB0001107	2-amino-9-[(2R,3R,4S,5R)-3,4-dihydroxy-5-(hydroxymethyl)oxolan-2-yl]-7-methyl-6-oxo-6,7-dihydro-3H-9<U+03BB>5-purin-9-ylium	7-Methylguanosine	CN1C=[N+]([C@@H]2O[C@H](CO)[C@@H](O)[C@H]2O)C2=C1C(=O)N=C(N)N2	expected	C11H15N5O5	297.107	7	Metabolite
HMDB0001109	{[(2S,3R,4R,5S,6R)-3-amino-4,5-dihydroxy-6-(hydroxymethyl)oxan-2-yl]oxy}phosphonic acid	Glucosamine-1P	N[C@@H]1[C@@H](O)[C@H](O)[C@@H](CO)O[C@H]1OP(O)(O)=O	expected	C6H14N1O8P1	259.046	1	Metabolite
HMDB0001112	(2-hydroxy-3-oxopropoxy)phosphonic acid	D-Glyceraldehyde 3-phosphate	OC(COP(O)(O)=O)C=O	quantified	C3H7O6P1	169.998	1	Metabolite
HMDB0001113	{[(2R,3S,4R,5R)-5-(6-amino-9H-purin-9-yl)-4-hydroxy-2-({[hydroxy({[hydroxy(3-hydroxy-2,2-dimethyl-3-{[2-({2-[(3-methylbutanoyl)sulfanyl]ethyl}carbamoyl)ethyl]carbamoyl}propoxy)phosphoryl]oxy})phosphoryl]oxy}methyl)oxolan-3-yl]oxy}phosphonic acid	Isovaleryl-CoA	CC(C)CC(=O)SCCNC(=O)CCNC(=O)C(O)C(C)(C)COP(O)(=O)OP(O)(=O)OC[C@H]1O[C@H]([C@H](O)[C@@H]1OP(O)(O)=O)N1C=NC2=C1N=CN=C2N	expected	C26H44N7O17P3S1	851.173	10	Metabolite
HMDB0001114	{[(2R,3S,4R,5R)-5-(6-amino-9H-purin-9-yl)-4-hydroxy-2-({[hydroxy({[hydroxy({3-hydroxy-2,2-dimethyl-3-[(2-{[2-(octadecanoylsulfanyl)ethyl]carbamoyl}ethyl)carbamoyl]propoxy})phosphoryl]oxy})phosphoryl]oxy}methyl)oxolan-3-yl]oxy}phosphonic acid	Stearoyl-CoA	CCCCCCCCCCCCCCCCCC(=O)SCCNC(=O)CCNC(=O)C(O)C(C)(C)COP(O)(=O)OP(O)(=O)OC[C@H]1O[C@H]([C@H](O)[C@@H]1OP(O)(O)=O)N1C=NC2=C1N=CN=C2N	expected	C39H70N7O17P3S1	1033.38	10	Metabolite
HMDB0001117	(2R)-2-{3-[(2R)-2-hydroxy-3-methyl-3-[(phosphonooxy)methyl]butanamido]propanamido}-3-sulfanylpropanoic acid	4'-Phosphopantothenoylcysteine	CC(C)(COP(O)(O)=O)[C@@H](O)C(=O)NCCC(=O)N[C@@H](CS)C(O)=O	expected	C12H23N2O9P1S1	402.086	3	Metabolite
HMDB0001119	4-hydroxy-4-(pyridin-3-yl)butanoic acid	4-Hydroxy-4-(3-pyridyl)-butanoic acid	OC(CCC(O)=O)C1=CC=CN=C1	expected	C9H11N1O3	181.074	5	Metabolite
HMDB0001120	({hydroxy[(3-methylbut-2-en-1-yl)oxy]phosphoryl}oxy)phosphonic acid	Dimethylallylpyrophosphate	CC(C)=CCO[P@](O)(=O)OP(O)(O)=O	expected	C5H12O7P2	246.006	1	Metabolite
HMDB0001121	{[(2R,3S,4R,5S,6S)-5-acetamido-3,4,6-trihydroxyoxan-2-yl]methoxy}phosphonic acid	N-Acetyl-D-mannosamine 6-phosphate	CC(=O)N[C@@H]1[C@@H](O)O[C@H](COP(O)(O)=O)[C@@H](O)[C@@H]1O	expected	C8H16N1O9P1	301.056	2	Metabolite
HMDB0001122	N-methylformamide	N-Methylformamide	CNC=O	detected	C2H5N1O1	59.0371	1	Metabolite
HMDB0001123	2-aminobenzoic acid	2-Aminobenzoic acid	NC1=CC=CC=C1C(O)=O	quantified	C7H7N1O2	137.048	5	Metabolite
HMDB0001124	{[(2R,3S,4S,5R,6R)-3,4,5-trihydroxy-6-{[(2R,3R,4S,5S,6R)-3,4,5-trihydroxy-6-(hydroxymethyl)oxan-2-yl]oxy}oxan-2-yl]methoxy}phosphonic acid	Trehalose 6-phosphate	OC[C@H]1O[C@H](O[C@H]2O[C@H](COP(O)(O)=O)[C@@H](O)[C@H](O)[C@H]2O)[C@H](O)[C@@H](O)[C@@H]1O	expected	C12H23O14P1	422.083	2	Metabolite
HMDB0001125	(3aR,4R,5S,6S,7R,7aS)-2,4,5,6,7-pentahydroxy-hexahydro-2H-1,3,2<U+03BB>5-benzodioxaphosphol-2-one	Inositol cyclic phosphate	O[C@H]1[C@H]2OP(O)(=O)O[C@H]2[C@H](O)[C@@H](O)[C@@H]1O	expected	C6H11O8P1	242.019	2	Metabolite
HMDB0001126	3-(pyrrolidin-2-yl)pyridine	Nornicotine	C1CNC(C1)C1=CC=CN=C1	quantified	C9H12N2	148.1	5	Metabolite
HMDB0001127	{[(2R,3S,4S,5R)-3,4,5-trihydroxy-6-oxooxan-2-yl]methoxy}phosphonic acid	6-Phosphonoglucono-D-lactone	O[C@H]1[C@H](O)[C@@H](COP(O)(O)=O)OC(=O)[C@@H]1O	quantified	C6H11O9P1	258.014	2	Metabolite
HMDB0001128	{[(2R,3S,4R,5R)-5-amino-3,4-dihydroxyoxolan-2-yl]methoxy}phosphonic acid	5-Phosphoribosylamine	N[C@@H]1O[C@H](COP(O)(O)=O)[C@@H](O)[C@H]1O	expected	C5H12N1O7P1	229.035	1	Metabolite
HMDB0001129	N-[(2R,3S,4R,5S,6R)-2,4,5-trihydroxy-6-(hydroxymethyl)oxan-3-yl]acetamide	N-Acetylmannosamine	CC(=O)N[C@@H]1[C@H](O)O[C@H](CO)[C@@H](O)[C@@H]1O	detected	C8H15N1O6	221.09	2	Metabolite
HMDB0001131	2-iminobutanedioic acid	Iminoaspartic acid	OC(=O)CC(=N)C(O)=O	expected	C4H5N1O4	131.022	3	Metabolite
HMDB0001132	3-carboxy-1-[(2R,3R,4S,5R)-5-[(hydrogen phosphonatooxy)methyl]-3,4-dihydroxyoxolan-2-yl]-2,3-dihydro-1<U+03BB>5-pyridin-1-ylium	Nicotinic acid mononucleotide	O[C@H]1[C@@H](O)[C@@H](O[C@@H]1COP(O)([O-])=O)[N+]1=CC=CC(C1)C(O)=O	expected	C11H16N1O9P1	337.056	5	Metabolite
HMDB0001134	[({[(2R,3S,4R,5R)-5-(6-amino-9H-purin-9-yl)-4-hydroxy-3-(phosphonooxy)oxolan-2-yl]methoxy}(hydroxy)phosphoryl)oxy]sulfonic acid	Phosphoadenosine phosphosulfate	NC1=NC=NC2=C1N=CN2[C@@H]1O[C@H](COP(O)(=O)OS(O)(=O)=O)[C@@H](OP(O)(O)=O)[C@H]1O	expected	C10H15N5O13P2S1	506.986	7	Metabolite
HMDB0001137	3-(2-{[4-(2-carboxyethyl)-5-{[4-(2-carboxyethyl)-5-{[4-(2-carboxyethyl)-3-(carboxymethyl)-1H-pyrrol-2-yl]methyl}-3-(carboxymethyl)-1H-pyrrol-2-yl]methyl}-3-(carboxymethyl)-1H-pyrrol-2-yl]methyl}-4-(carboxymethyl)-5-(hydroxymethyl)-1H-pyrrol-3-yl)propanoic acid	Hydroxymethylbilane	OCC1=C(CC(O)=O)C(CCC(O)=O)=C(CC2=C(CC(O)=O)C(CCC(O)=O)=C(CC3=C(CC(O)=O)C(CCC(O)=O)=C(CC4=C(CC(O)=O)C(CCC(O)=O)=CN4)N3)N2)N1	expected	C40H46N4O17	854.286	20	Metabolite
HMDB0001138	2-acetamidopentanedioic acid	N-Acetylglutamic acid	CC(=O)NC(CCC(O)=O)C(O)=O	quantified	C7H11N1O5	189.064	3	Metabolite
HMDB0001139	(5E)-7-[(1R,2R,3R,5S)-3,5-dihydroxy-2-[(1E,3S)-3-hydroxyoct-1-en-1-yl]cyclopentyl]hept-5-enoic acid	Prostaglandin F2a	CCCCC[C@H](O)\C=C\[C@H]1[C@H](O)C[C@H](O)[C@@H]1C\C=C\CCCC(O)=O	quantified	C20H34O5	354.241	4	Metabolite
HMDB0001140	octanal	Octanal	CCCCCCCC=O	quantified	C8H16O1	128.12	1	Metabolite
HMDB0001142	{[(2R,3S,4S)-5-{7,8-dimethyl-2,4-dioxo-1H,2H,3H,4H,5H,10H-benzo[g]pteridin-10-yl}-2,3,4-trihydroxypentyl]oxy}phosphonic acid	FMNH2	CC1=CC2=C(C=C1C)N(C[C@H](O)[C@H](O)[C@H](O)COP(O)(O)=O)C1=C(N2)C(=O)NC(=O)N1	expected	C17H23N4O9P1	458.12	9	Metabolite
HMDB0001143	{[(1S,2R,3R,4S,5S,6S)-2,3,5-trihydroxy-4,6-bis(phosphonooxy)cyclohexyl]oxy}phosphonic acid	Inositol 1,3,4-trisphosphate	O[C@@H]1[C@@H](O)[C@H](OP(O)(O)=O)[C@@H](OP(O)(O)=O)[C@@H](O)[C@H]1OP(O)(O)=O	expected	C6H15O15P3	419.962	1	Metabolite
HMDB0001147	2-aminopropanedioic acid	Aminomalonic acid	NC(C(O)=O)C(O)=O	detected	C3H5N1O4	119.022	2	Metabolite
HMDB0001149	5-amino-4-oxopentanoic acid	5-Aminolevulinic acid	NCC(=O)CCC(O)=O	quantified	C5H9N1O3	131.058	2	Metabolite
HMDB0001151	(3S,4S,5R,6S)-6-(hydroxymethyl)oxane-2,3,4,5-tetrol	Allose	[H][C@@]1(CO)OC(O)[C@@]([H])(O)[C@@]([H])(O)[C@@]1([H])O	expected	C6H12O6	180.063	1	Metabolite
HMDB0001155	{[(2S,3R,4S,5S)-5-(6-amino-9H-purin-9-yl)-3,4-dihydroxyoxolan-2-yl]methoxy}({[({[(2R,3S,4R,5R)-5-(6-amino-9H-purin-9-yl)-3,4-dihydroxyoxolan-2-yl]methoxy}(hydroxy)phosphoryl)oxy](hydroxy)phosphoryl}oxy)phosphinic acid	Diadenosine triphosphate	NC1=C2N=CN([C@H]3O[C@@H](COP(O)(=O)OP(O)(=O)OP(O)(=O)OC[C@H]4O[C@H]([C@H](O)[C@@H]4O)N4C=NC5=C(N)N=CN=C45)[C@H](O)[C@@H]3O)C2=NC=N1	quantified	C20H27N10O16P3	756.082	14	Metabolite
HMDB0001157	{[5-(6-amino-9H-purin-9-yl)-4-hydroxy-2-({[hydroxy({[hydroxy(3-hydroxy-2,2-dimethyl-3-{[2-({2-[(2-methyl-3-oxobutanoyl)sulfanyl]ethyl}carbamoyl)ethyl]carbamoyl}propoxy)phosphoryl]oxy})phosphoryl]oxy}methyl)oxolan-3-yl]oxy}phosphonic acid	2-Methylacetoacetyl-CoA	CC(C(C)=O)C(=O)SCCNC(=O)CCNC(=O)C(O)C(C)(C)COP(O)(=O)OP(O)(=O)OCC1OC(C(O)C1OP(O)(O)=O)N1C=NC2=C(N)N=CN=C12	expected	C26H42N7O18P3S1	865.152	11	Metabolite
HMDB0001160	tricosanoic acid	Tricosanoic acid	CCCCCCCCCCCCCCCCCCCCCCC(O)=O	quantified	C23H46O2	354.35	1	Metabolite
HMDB0001161	(3-carboxypropyl)trimethylazanium	4-Trimethylammoniobutanoic acid	C[N+](C)(C)CCCC(O)=O	quantified	C7H15N1O2	145.11	1	Metabolite
HMDB0001162	3-[(11Z,16Z)-20-(2-carboxyethyl)-15-ethenyl-10-[(4E,8E)-1-hydroxy-5,9,13-trimethyltetradeca-4,8,12-trien-1-yl]-5,9,14,19-tetramethyl-21,23,24,25-tetraaza-22-ferrahexacyclo[9.9.3.1?6.1????????,?.08,????????.0?,????????]pentacosa-1(20),2,4,6(25),7,9,11,13(24),14,16,18-undecaen-4-yl]propanoic acid	Heme O	CC(C)=CCC\C(C)=C\CC\C(C)=C\CCC(O)C1=C(C)/C2=C/C3=N/C(=C\C4=C(CCC(O)=O)C(C)=C5/C=C6\N=C(\C=C\1/N\2[Fe]N45)C(C)=C6C=C)/C(CCC(O)=O)=C3C	expected	C49Fe1H58N4O5	838.376	23	Metabolite
HMDB0001163	{[(2R,3S,4R,5R)-5-(2-amino-6-oxo-6,9-dihydro-1H-purin-9-yl)-3,4-dihydroxyoxolan-2-yl]methoxy}({[hydroxy({[(2R,3S,4S,5S,6R)-3,4,5-trihydroxy-6-(hydroxymethyl)oxan-2-yl]oxy})phosphoryl]oxy})phosphinic acid	Guanosine diphosphate mannose	NC1=NC2=C(N=CN2[C@@H]2O[C@H](COP(O)(=O)OP(O)(=O)O[C@H]3O[C@H](CO)[C@@H](O)[C@H](O)[C@@H]3O)[C@@H](O)[C@H]2O)C(=O)N1	expected	C16H25N5O16P2	605.077	8	Metabolite
HMDB0001164	(1R,2R)-cyclohexa-3,5-diene-1,2-diol	trans-1,2-Dihydrobenzene-1,2-diol	O[C@@H]1C=CC=C[C@H]1O	expected	C6H8O2	112.052	3	Metabolite
HMDB0001165	{[(2S,4S,5R,6S)-5-acetamido-6-{[(2S,3R,4S,5S,6R)-2-{[(2R,3S,4R,5R,6S)-5-acetamido-4-hydroxy-2-[(sulfooxy)methyl]-6-{[(2R,3R,4S,5S,6R)-2,3,5-trihydroxy-6-[(sulfooxy)methyl]oxan-4-yl]oxy}oxan-3-yl]oxy}-3,5-dihydroxy-6-[(sulfooxy)methyl]oxan-4-yl]oxy}-4-hydroxyoxan-2-yl]methoxy}sulfonic acid	Keratan	CC(=O)N[C@@H]1[C@@H](O)C[C@@H](COS(O)(=O)=O)O[C@H]1O[C@H]1[C@@H](O)[C@@H](COS(O)(=O)=O)O[C@@H](O[C@H]2[C@H](O)[C@@H](NC(C)=O)[C@H](O[C@@H]3[C@@H](O)[C@H](O)O[C@H](COS(O)(=O)=O)[C@@H]3O)O[C@@H]2COS(O)(=O)=O)[C@@H]1O	quantified	C28H48N2O32S4	1052.11	6	Metabolite
HMDB0001166	{[(2R,3S,4R,5R)-5-(6-amino-9H-purin-9-yl)-4-hydroxy-2-({[hydroxy({hydroxy[3-hydroxy-3-({2-[(2-{[(3R)-3-hydroxybutanoyl]sulfanyl}ethyl)carbamoyl]ethyl}carbamoyl)-2,2-dimethylpropoxy]phosphoryl}oxy)phosphoryl]oxy}methyl)oxolan-3-yl]oxy}phosphonic acid	3-Hydroxybutyryl-CoA	C[C@@H](O)CC(=O)SCCNC(=O)CCNC(=O)C(O)C(C)(C)COP(O)(=O)OP(O)(=O)OC[C@H]1O[C@H]([C@H](O)[C@@H]1OP(O)(O)=O)N1C=NC2=C1N=CN=C2N	expected	C25H42N7O18P3S1	853.152	10	Metabolite
HMDB0001167	2-oxopropanal	Pyruvaldehyde	CC(=O)C=O	quantified	C3H4O2	72.0211	2	Metabolite
HMDB0001168	{[(2R,3S,4R,5R)-5-(6-amino-9H-purin-9-yl)-2-{[({[(3-{[2-({2-[(2E,4E)-deca-2,4-dienoylsulfanyl]ethyl}carbamoyl)ethyl]carbamoyl}-3-hydroxy-2,2-dimethylpropoxy)(hydroxy)phosphoryl]oxy}(hydroxy)phosphoryl)oxy]methyl}-4-hydroxyoxolan-3-yl]oxy}phosphonic acid	2,4-Decadienoyl-CoA	CCCCC\C=C\C=C\C(=O)SCCNC(=O)CCNC(=O)C(O)C(C)(C)COP(=O)(O)OP(=O)(O)OC[C@H]1O[C@H]([C@H](O)[C@@H]1OP(O)(=O)O)N1C=NC2=C1N=CN=C2N	expected	C31H50N7O17P3S1	917.22	12	Metabolite
HMDB0001169	4-aminophenol	4-Aminophenol	NC1=CC=C(O)C=C1	quantified	C6H7N1O1	109.053	4	Metabolite
HMDB0001170	(1R,2S,5S,7S,11R,14R,15R)-2,15-dimethyl-14-[(2R)-6-methylheptan-2-yl]tetracyclo[8.7.0.0?7.0????????,?]heptadec-9-en-5-ol	Lathosterol	[H][C@@]1(CC[C@@]2([H])C3=CC[C@@]4([H])C[C@@H](O)CC[C@]4(C)[C@@]3([H])CC[C@]12C)[C@H](C)CCCC(C)C	quantified	C27H46O1	386.355	5	Metabolite
HMDB0001172	2-methyl-3-oxopropanoic acid	2-Methyl-3-oxopropanoic acid	CC(C=O)C(O)=O	expected	C4H6O3	102.032	2	Metabolite
HMDB0001173	(2R,3R,4S,5S)-2-(6-amino-9H-purin-9-yl)-5-[(methylsulfanyl)methyl]oxolane-3,4-diol	5'-Methylthioadenosine	CSC[C@H]1O[C@H]([C@H](O)[C@@H]1O)N1C=NC2=C1N=CN=C2N	quantified	C11H15N5O3S1	297.09	7	Metabolite
HMDB0001175	3-{[2-(3-{3-[({[({[(2R,3S,4R,5R)-5-(6-amino-9H-purin-9-yl)-4-hydroxy-3-(phosphonooxy)oxolan-2-yl]methoxy}(hydroxy)phosphoryl)oxy](hydroxy)phosphoryl}oxy)methyl]-2-hydroxy-3-methylbutanamido}propanamido)ethyl]sulfanyl}-3-oxopropanoic acid	Malonyl-CoA	CC(C)(COP(O)(=O)OP(O)(=O)OC[C@H]1O[C@H]([C@H](O)[C@@H]1OP(O)(O)=O)N1C=NC2=C1N=CN=C2N)C(O)C(=O)NCCC(=O)NCCSC(=O)CC(O)=O	expected	C24H38N7O19P3S1	853.116	11	Metabolite
HMDB0001176	(2R,4S,5R,6R)-2-[({[(2R,3S,4R,5R)-5-(4-amino-2-oxo-1,2-dihydropyrimidin-1-yl)-3,4-dihydroxyoxolan-2-yl]methoxy}(hydroxy)phosphoryl)oxy]-5-acetamido-4-hydroxy-6-[(1R,2R)-1,2,3-trihydroxypropyl]oxane-2-carboxylic acid	Cytidine monophosphate N-acetylneuraminic acid	[H][C@]1(O[C@](C[C@H](O)[C@H]1NC(C)=O)(OP(O)(=O)OC[C@H]1O[C@H]([C@H](O)[C@@H]1O)N1C=CC(N)=NC1=O)C(O)=O)[C@H](O)[C@H](O)CO	expected	C20H31N4O16P1	614.147	8	Metabolite
HMDB0001177	4-{[(3R)-7-carbamoyl-1-sulfanylheptan-3-yl]sulfanyl}-4-oxobutanoic acid	(S)-Succinyldihydrolipoamide	NC(=O)CCCC[C@H](CCS)SC(=O)CCC(O)=O	expected	C12H21N1O4S2	307.091	3	Metabolite
HMDB0001178	{[5-(6-amino-9H-purin-9-yl)-3,4-dihydroxyoxolan-2-yl]methoxy}({hydroxy[(3,4,5-trihydroxyoxolan-2-yl)methoxy]phosphoryl}oxy)phosphinic acid	Adenosine diphosphate ribose	NC1=C2N=CN(C3OC(COP(O)(=O)OP(O)(=O)OCC4OC(O)C(O)C4O)C(O)C3O)C2=NC=N1	expected	C15H23N5O14P2	559.072	8	Metabolite
HMDB0001179	1-[(2R,3R,4S,5R)-5-[({[({[(2R,3S,4R,5R)-5-(6-amino-9H-purin-9-yl)-3,4-dihydroxyoxolan-2-yl]methoxy}(hydroxy)phosphoryl)oxy](hydroxy)phosphoryl}oxy)methyl]-3,4-dihydroxyoxolan-2-yl]-3-carboxy-1<U+03BB>5-pyridin-1-ylium	Nicotinic acid adenine dinucleotide	NC1=C2N=CN([C@@H]3O[C@H](COP(O)(=O)OP(O)(=O)OC[C@H]4O[C@H]([C@H](O)[C@@H]4O)[N+]4=CC=CC(=C4)C(O)=O)[C@@H](O)[C@H]3O)C2=NC=N1	expected	C21H26N6O15P2	664.093	13	Metabolite
HMDB0001180	(2S)-2-(3-carboxypropanamido)-5-oxopentanoic acid	N2-Succinyl-L-glutamic acid 5-semialdehyde	OC(=O)CCC(=O)N[C@@H](CCC=O)C(O)=O	expected	C9H13N1O6	231.074	4	Metabolite
HMDB0001181	(2S,5S,6S,7R,15R)-5-hydroxy-2,6,15-trimethyl-14-[(2R)-6-methylhept-5-en-2-yl]tetracyclo[8.7.0.0?7.0????????,?]heptadec-1(10)-ene-6-carboxylic acid	4a-Carboxy-4b-methyl-5a-cholesta-8,24-dien-3b-ol	[H][C@@]12CCC3=C(CC[C@]4(C)C(CCC34)[C@H](C)CCC=C(C)C)[C@@]1(C)CC[C@H](O)[C@@]2(C)C(O)=O	expected	C29H46O3	442.345	7	Metabolite
HMDB0001182	6,7,8,9-tetrahydro-3H-purine-6,8-dione	6,8-Dihydroxypurine	O=C1NC2=C(N1)C(=O)N=CN2	expected	C5H4N4O2	152.033	6	Metabolite
HMDB0001183	octan-1-ol	Octanol	CCCCCCCCO	quantified	C8H18O1	130.136	0	Metabolite
HMDB0001184	(3E)-pent-3-en-2-one	Methyl propenyl ketone	C\C=C\C(C)=O	detected	C5H8O1	84.0575	2	Metabolite
HMDB0001185	[(3S)-3-amino-3-carboxypropyl]({[(2S,3S,4R,5R)-5-(6-amino-9H-purin-9-yl)-3,4-dihydroxyoxolan-2-yl]methyl})methylsulfanium	S-Adenosylmethionine	C[S+](CC[C@H](N)C(O)=O)C[C@H]1O[C@H]([C@H](O)[C@@H]1O)N1C=NC2=C1N=CN=C2N	quantified	C15H22N6O5S1	398.137	8	Metabolite
HMDB0001186	N-[3-({4-[(3-aminopropyl)amino]butyl}amino)propyl]acetamide	N1-Acetylspermine	CC(=O)NCCCNCCCCNCCCN	quantified	C12H28N4O1	244.226	1	Metabolite
HMDB0001187	{[(1S,2s,3R,4R,5r,6S)-2,5-dihydroxy-3,4,6-tris(phosphonooxy)cyclohexyl]oxy}phosphonic acid	1D-Myo-inositol 1,3,4,6-tetrakisphosphate	O[C@H]1[C@H](OP(O)(O)=O)[C@@H](OP(O)(O)=O)[C@@H](O)[C@@H](OP(O)(O)=O)[C@@H]1OP(O)(O)=O	expected	C6H16O18P4	499.929	1	Metabolite
HMDB0001188	(3S)-2,2-dimethyl-3-[(3E,7E,11E,15E)-3,7,12,16,20-pentamethylhenicosa-3,7,11,15,19-pentaen-1-yl]oxirane	(S)-2,3-Epoxysqualene	CC(C)=CCC\C(C)=C\CC\C(C)=C\CC\C=C(/C)CC\C=C(/C)CC[C@@H]1OC1(C)C	expected	C30H50O1	426.386	6	Metabolite
HMDB0001189	2-methyl-1,2,3,4-tetrahydroisoquinoline-6,7-diol	2(N)-Methyl-norsalsolinol	CN1CCC2=CC(O)=C(O)C=C2C1	detected	C10H13N1O2	179.095	5	Metabolite
HMDB0001190	2-(1H-indol-3-yl)acetaldehyde	Indoleacetaldehyde	O=CCC1=CNC2=CC=CC=C12	quantified	C10H9N1O1	159.068	7	Metabolite
HMDB0001191	({[({[(2R,3S,5R)-5-(2,4-dioxo-1,2,3,4-tetrahydropyrimidin-1-yl)-3-hydroxyoxolan-2-yl]methoxy}(hydroxy)phosphoryl)oxy](hydroxy)phosphoryl}oxy)phosphonic acid	Deoxyuridine triphosphate	O[C@H]1C[C@@H](O[C@@H]1COP(O)(=O)OP(O)(=O)OP(O)(O)=O)N1C=CC(=O)NC1=O	quantified	C9H15N2O14P3	467.974	5	Metabolite
HMDB0001192	{[(3S,4R,5R)-5-(6-amino-9H-purin-9-yl)-3,4-dihydroxyoxolan-2-yl]methoxy}[({[({[({[(2R,3S,4R)-5-(6-amino-9H-purin-9-yl)-3,4-dihydroxyoxolan-2-yl]methoxy}(hydroxy)phosphoryl)oxy](hydroxy)phosphoryl}oxy)(hydroxy)phosphoryl]oxy}(hydroxy)phosphoryl)oxy]phosphinic acid	Diadenosine pentaphosphate	NC1=NC=NC2=C1N=CN2[C@@H]1OC(COP(O)(=O)OP(O)(=O)OP(O)(=O)OP(O)(=O)OP(O)(=O)OC[C@H]2OC([C@H](O)[C@@H]2O)N2C=NC3=C(N)N=CN=C23)[C@@H](O)[C@H]1O	quantified	C20H29N10O22P5	916.015	14	Metabolite
HMDB0001193	(5S,6E,8Z,11Z,14Z)-5-hydroperoxyicosa-6,8,11,14-tetraenoic acid	5(S)-Hydroperoxyeicosatetraenoic acid	CCCCC\C=C/C\C=C/C\C=C/C=C/[C@H](CCCC(O)=O)OO	expected	C20H32O4	336.23	5	Metabolite
HMDB0001195	1-(2-amino-4-oxo-3,4,5,6,7,8-hexahydropteridin-6-yl)propane-1,2-dione	Dyspropterin	CC(=O)C(=O)C1CNC2=C(N1)C(=O)NC(N)=N2	expected	C9H11N5O3	237.086	7	Metabolite
HMDB0001196	[(2S,3R,4R,5S,6R)-2-{[(2R,3S,4R,5R,6S)-5-(carboxyamino)-4-hydroxy-6-{[hydroxy({[hydroxy({[(6E)-3,7,10-trimethylundeca-6,9-dien-1-yl]oxy})phosphoryl]oxy})phosphoryl]oxy}-2-(hydroxymethyl)oxan-3-yl]oxy}-4,5-dihydroxy-6-(hydroxymethyl)oxan-3-yl]carbamic acid	N,N'-Diacetylchitobiosyldiphosphodolichol	OC[C@H]1O[C@@H](O[C@H]2[C@H](O)[C@@H](NC(O)=O)[C@@H](O[C@@H]2CO)OP(=O)(O)OP(O)(=O)OCCC(C)CC\C=C(/C)CC=C(C)C)[C@H](NC(O)=O)[C@@H](O)[C@@H]1O	expected	C28H50N2O19P2	780.248	6	Metabolite
HMDB0001197	[({[(2R,3S,4R,5R)-5-(6-amino-9H-purin-9-yl)-3,4-dihydroxyoxolan-2-yl]methoxy}(hydroxy)phosphoryl)oxy]({[(2R,3S,4S)-5-{7,8-dimethyl-2,4-dioxo-1H,2H,3H,4H,5H,10H-benzo[g]pteridin-10-yl}-2,3,4-trihydroxypentyl]oxy})phosphinic acid	FADH	CC1=CC2=C(C=C1C)N(C[C@H](O)[C@H](O)[C@H](O)COP(O)(=O)OP(O)(=O)OC[C@H]1O[C@H]([C@H](O)[C@@H]1O)N1C=NC3=C1N=CN=C3N)C1=C(N2)C(=O)NC(=O)N1	expected	C27H35N9O15P2	787.173	16	Metabolite
HMDB0001198	(5S,6R,7E,9E,11E,14Z)-6-{[(2R)-2-[(4S)-4-amino-4-carboxybutanamido]-2-[(carboxymethyl)carbamoyl]ethyl]sulfanyl}-5-hydroxyicosa-7,9,11,14-tetraenoic acid	Leukotriene C4	CCCCC\C=C/C\C=C/C=C/C=C/[C@@H](SC[C@H](NC(=O)CC[C@H](N)C(O)=O)C(=O)NCC(O)=O)[C@@H](O)CCCC(O)=O	quantified	C30H47N3O9S1	625.303	9	Metabolite
HMDB0001199	(2S)-5-amino-2-(3-carboxypropanamido)pentanoic acid	N2-Succinyl-L-ornithine	NCCC[C@H](NC(=O)CCC(O)=O)C(O)=O	expected	C9H16N2O5	232.106	3	Metabolite
HMDB0001200	2-amino-4-(2-formamidophenyl)-4-oxobutanoic acid	N'-Formylkynurenine	NC(CC(=O)C1=CC=CC=C1NC=O)C(O)=O	expected	C11H12N2O4	236.08	7	Metabolite
HMDB0001201	[({[(2R,3S,4R,5R)-5-(2-amino-6-oxo-6,9-dihydro-1H-purin-9-yl)-3,4-dihydroxyoxolan-2-yl]methoxy}(hydroxy)phosphoryl)oxy]phosphonic acid	Guanosine diphosphate	NC1=NC2=C(N=CN2[C@@H]2O[C@H](COP(O)(=O)OP(O)(O)=O)[C@@H](O)[C@H]2O)C(=O)N1	quantified	C10H15N5O11P2	443.024	7	Metabolite
HMDB0001202	{[(2R,3S,5R)-5-(4-amino-2-oxo-1,2-dihydropyrimidin-1-yl)-3-hydroxyoxolan-2-yl]methoxy}phosphonic acid	dCMP	NC1=NC(=O)N(C=C1)[C@H]1C[C@H](O)[C@@H](COP(O)(O)=O)O1	detected	C9H14N3O7P1	307.057	5	Metabolite
HMDB0001203	5-hydroxy-2,15-dimethyl-14-(6-methylhept-5-en-2-yl)tetracyclo[8.7.0.0?7.0????????,?]heptadec-1(10)-ene-6-carbaldehyde	4a-Formyl-5a-cholesta-8,24-dien-3b-ol	CC(CCC=C(C)C)C1CCC2C3=C(CCC12C)C1(C)CCC(O)C(C=O)C1CC3	expected	C28H44O2	412.334	7	Metabolite
HMDB0001204	(2S,3S,4S,5R,6R)-3,4,5-trihydroxy-6-{[(3R)-1-methyl-2-oxo-5-(pyridin-3-yl)pyrrolidin-3-yl]oxy}oxane-2-carboxylic acid	trans-3-Hydroxycotinine glucuronide	[H][C@@]1(O[C@@H]2CC(N(C)C2=O)C2=CC=CN=C2)O[C@@H]([C@@H](O)[C@H](O)[C@H]1O)C(O)=O	expected	C16H20N2O8	368.122	8	Metabolite
HMDB0001206	{[(2R,3S,4R,5R)-2-({[({[(3R)-3-[(2-{[2-(acetylsulfanyl)ethyl]carbamoyl}ethyl)carbamoyl]-3-hydroxy-2,2-dimethylpropoxy](hydroxy)phosphoryl}oxy)(hydroxy)phosphoryl]oxy}methyl)-5-(6-amino-9H-purin-9-yl)-4-hydroxyoxolan-3-yl]oxy}phosphonic acid	Acetyl-CoA	CC(=O)SCCNC(=O)CCNC(=O)[C@H](O)C(C)(C)COP(O)(=O)OP(O)(=O)OC[C@H]1O[C@H]([C@H](O)[C@@H]1OP(O)(O)=O)N1C=NC2=C1N=CN=C2N	expected	C23H38N7O17P3S1	809.126	10	Metabolite
HMDB0001209	2,2-bis(carbamoylamino)acetic acid	Allantoic acid	NC(=O)NC(NC(N)=O)C(O)=O	expected	C4H8N4O4	176.055	3	Metabolite
HMDB0001211	{[(2R,3S,4R,5R)-5-(6-amino-9H-purin-9-yl)-3,4-dihydroxyoxolan-2-yl]methoxy}({[({[({[(2R,3S,4R,5R)-5-(6-amino-9H-purin-9-yl)-3,4-dihydroxyoxolan-2-yl]methoxy}(hydroxy)phosphoryl)oxy](hydroxy)phosphoryl}oxy)(hydroxy)phosphoryl]oxy})phosphinic acid	Diadenosine tetraphosphate	NC1=C2N=CN([C@@H]3O[C@H](COP(O)(=O)OP(O)(=O)OP(O)(=O)OP(O)(=O)OC[C@H]4O[C@H]([C@H](O)[C@@H]4O)N4C=NC5=C(N)N=CN=C45)[C@@H](O)[C@H]3O)C2=NC=N1	quantified	C20H28N10O19P4	836.048	14	Metabolite
HMDB0001212	3-(2,5-dioxoimidazolidin-4-yl)propanoic acid	Hydantoin-5-propionic acid	OC(=O)CCC1NC(=O)NC1=O	expected	C6H8N2O4	172.048	4	Metabolite
HMDB0001213	{[(2R,3S)-2,3-dihydroxy-4-oxopentyl]oxy}phosphonic acid	1-Deoxy-D-xylulose 5-phosphate	CC(=O)[C@@H](O)[C@H](O)COP(O)(O)=O	expected	C5H11O7P1	214.024	1	Metabolite
HMDB0001216	5,6,7,8-tetrahydropteridine	Tetrahydropteridine	C1CNC2=C(N1)C=NC=N2	expected	C6H8N4	136.075	5	Metabolite
HMDB0001217	(2S,5S,6S,7S,11R,14R,15R)-2,6,15-trimethyl-14-[(2R)-6-methylhept-5-en-2-yl]tetracyclo[8.7.0.0?7.0????????,?]heptadec-1(10)-en-5-ol	4a-Methylzymosterol	[H][C@@]1(CC[C@@]2([H])C3=C(CC[C@]12C)[C@@]1(C)CC[C@H](O)[C@@H](C)[C@]1([H])CC3)[C@H](C)CCC=C(C)C	expected	C28H46O1	398.355	6	Metabolite
HMDB0001218	2H-chromen-2-one	Coumarin	O=C1OC2=CC=CC=C2C=C1	detected	C9H6O2	146.037	7	Metabolite
HMDB0001219	1,2,3,4,6,7,8,9,10,10-decachloropentacyclo[5.3.0.0?6.0?<U+2079>.04,8]decan-5-ol	Chlordecone alcohol	OC1C2(Cl)C3(Cl)C4(Cl)C1(Cl)C1(Cl)C2(Cl)C3(Cl)C(Cl)(Cl)C41Cl	expected	C10Cl10H2O1	487.699	5	Metabolite
HMDB0001220	(5Z)-7-[(1R,2R,3R)-3-hydroxy-2-[(1E,3S)-3-hydroxyoct-1-en-1-yl]-5-oxocyclopentyl]hept-5-enoic acid	Prostaglandin E2	CCCCC[C@H](O)\C=C\[C@H]1[C@H](O)CC(=O)[C@@H]1C\C=C/CCCC(O)=O	quantified	C20H32O5	352.225	5	Metabolite
HMDB0001227	{[(2R,3S,5R)-3-hydroxy-5-(5-methyl-2,4-dioxo-1,2,3,4-tetrahydropyrimidin-1-yl)oxolan-2-yl]methoxy}phosphonic acid	5-Thymidylic acid	CC1=CN([C@H]2C[C@H](O)[C@@H](COP(O)(O)=O)O2)C(=O)NC1=O	detected	C10H15N2O8P1	322.057	5	Metabolite
HMDB0001228	(2S)-2-amino-5-oxo-5-(phosphonooxy)pentanoic acid	L-Glutamic acid 5-phosphate	N[C@@H](CCC(=O)OP(O)(O)=O)C(O)=O	expected	C5H10N1O7P1	227.019	2	Metabolite
HMDB0001229	(2S)-2-amino-3-(3,4-dioxocyclohexa-1,5-dien-1-yl)propanoic acid	Dopaquinone	N[C@@H](CC1=CC(=O)C(=O)C=C1)C(O)=O	detected	C9H9N1O4	195.053	6	Metabolite
HMDB0001231	(1S,2S,5R,7S,9R,10R,11S,14R,15R,16S)-14-[(2R)-7-hydroxy-6-methylheptan-2-yl]-2,15-dimethyltetracyclo[8.7.0.0?7.0????????,?]heptadecane-5,9,16-triol	27-Deoxy-5b-cyprinol	[H][C@@]1(CC[C@@]2([H])[C@]3([H])[C@H](O)C[C@]4([H])C[C@H](O)CC[C@]4(C)[C@@]3([H])C[C@H](O)[C@]12C)[C@H](C)CCCC(C)CO	expected	C27H48O4	436.355	4	Metabolite
HMDB0001232	4-nitrophenol	4-Nitrophenol	OC1=CC=C(C=C1)[N+]([O-])=O	detected	C6H5N1O3	139.027	5	Metabolite
HMDB0001235	{[(2R,3S,4R,5R)-5-(5-amino-1H-imidazol-1-yl)-3,4-dihydroxyoxolan-2-yl]methoxy}phosphonic acid	5-Aminoimidazole ribonucleotide	NC1=CN=CN1[C@@H]1O[C@H](COP(O)(O)=O)[C@@H](O)[C@H]1O	expected	C8H14N3O7P1	295.057	4	Metabolite
HMDB0001238	N-[2-(5-hydroxy-1H-indol-3-yl)ethyl]acetamide	N-Acetylserotonin	CC(=O)NCCC1=CNC2=C1C=C(O)C=C2	quantified	C12H14N2O2	218.106	7	Metabolite
HMDB0001240	4-(methylamino)-1-(pyridin-3-yl)butan-1-one	Pseudooxynicotine	CNCCCC(=O)C1=CC=CN=C1	expected	C10H14N2O1	178.111	5	Metabolite
HMDB0001241	(2Z,4E)-5-aminohexa-2,4-dienedioic acid	2-Aminomuconic acid	N\C(=C\C=C/C(O)=O)C(O)=O	expected	C6H7N1O4	157.038	4	Metabolite
HMDB0001242	11-(hydroxymethyl)-2,6,6,15-tetramethyl-14-(6-methylhept-5-en-2-yl)tetracyclo[8.7.0.0?7.0????????,?]heptadec-1(10)-en-5-ol	Obtusifoliol	CC(CCC=C(C)C)C1CCC2(CO)C3=C(CCC12C)C1(C)CCC(O)C(C)(C)C1CC3	expected	C30H50O2	442.381	6	Metabolite
HMDB0001243	{[(2R,3S,4R,5R)-5-(6-amino-9H-purin-9-yl)-4-hydroxy-2-({[hydroxy({hydroxy[(3R)-3-hydroxy-2,2-dimethyl-3-{[2-({2-[(2-methylpropanoyl)sulfanyl]ethyl}carbamoyl)ethyl]carbamoyl}propoxy]phosphoryl}oxy)phosphoryl]oxy}methyl)oxolan-3-yl]oxy}phosphonic acid	Isobutyryl-CoA	CC(C)C(=O)SCCNC(=O)CCNC(=O)[C@H](O)C(C)(C)COP(O)(=O)OP(O)(=O)OC[C@H]1O[C@H]([C@H](O)[C@@H]1OP(O)(O)=O)N1C=NC2=C1N=CN=C2N	expected	C25H42N7O17P3S1	837.157	10	Metabolite
HMDB0001244	(5Z)-7-[(1R,5S)-2-oxo-5-(3-oxooctyl)cyclopent-3-en-1-yl]hept-5-enoic acid	15-Keto-13,14-dihydroprostaglandin A2	CCCCCC(=O)CC[C@H]1C=CC(=O)[C@@H]1C\C=C/CCCC(O)=O	quantified	C20H30O4	334.214	6	Metabolite
HMDB0001245	[({[(2R,3S,5R)-5-(4-amino-2-oxo-1,2-dihydropyrimidin-1-yl)-3-hydroxyoxolan-2-yl]methoxy}(hydroxy)phosphoryl)oxy]phosphonic acid	dCDP	NC1=NC(=O)N(C=C1)[C@H]1C[C@H](O)[C@@H](COP(O)(=O)OP(O)(O)=O)O1	expected	C9H15N3O10P2	387.023	5	Metabolite
HMDB0001248	[({[(2R,3S,4R,5R)-5-(6-amino-9H-purin-9-yl)-3,4-dihydroxyoxolan-2-yl]methoxy}(hydroxy)phosphoryl)oxy]({[(2R,3S,4S)-5-{7,8-dimethyl-2,4-dioxo-2H,3H,4H,10H-benzo[g]pteridin-10-yl}-2,3,4-trihydroxypentyl]oxy})phosphinic acid	FAD	CC1=CC2=C(C=C1C)N(C[C@H](O)[C@H](O)[C@H](O)CO[P@](O)(=O)O[P@@](O)(=O)OC[C@H]1O[C@H]([C@H](O)[C@@H]1O)N1C=NC3=C1N=CN=C3N)C1=NC(=O)NC(=O)C1=N2	quantified	C27H33N9O15P2	785.157	17	Metabolite
HMDB0001250	N-phenylacetamide	N-Acetylarylamine	CC(=O)NC1=CC=CC=C1	expected	C8H9N1O1	135.068	5	Metabolite
HMDB0001251	(2S,5S,7R,11R,14R,15R)-2,6,6,11,15-pentamethyl-14-[(2R)-6-methylhept-5-en-2-yl]tetracyclo[8.7.0.0?7.0????????,?]heptadec-1(10)-en-5-ol	Lanosterin	[H][C@@]1(CC[C@@]2(C)C3=C(CC[C@]12C)[C@@]1(C)CC[C@H](O)C(C)(C)[C@]1([H])CC3)[C@H](C)CCC=C(C)C	quantified	C30H50O1	426.386	6	Metabolite
HMDB0001252	trimethyl(2-oxoethyl)azanium	Betaine aldehyde	C[N+](C)(C)CC=O	expected	C5H11N1O1	101.084	1	Metabolite
HMDB0001253	5,6-dihydroxy-1H-indole-2-carboxylic acid	5,6-Dihydroxyindole-2-carboxylic acid	OC(=O)C1=CC2=C(N1)C=C(O)C(O)=C2	expected	C9H7N1O4	193.038	7	Metabolite
HMDB0001254	{[(2R,3S,4R,5R,6S)-5-amino-3,4,6-trihydroxyoxan-2-yl]methoxy}phosphonic acid	Glucosamine 6-phosphate	N[C@H]1[C@@H](O)O[C@H](COP(O)(O)=O)[C@@H](O)[C@@H]1O	expected	C6H14N1O8P1	259.046	1	Metabolite
HMDB0001256	(3-aminopropyl)({4-[(3-aminopropyl)amino]butyl})amine	Spermine	NCCCNCCCCNCCCN	quantified	C10H26N4	202.216	0	Metabolite
HMDB0001257	(4-aminobutyl)(3-aminopropyl)amine	Spermidine	NCCCCNCCCN	quantified	C7H19N3	145.158	0	Metabolite
HMDB0001259	4-oxobutanoic acid	Succinic acid semialdehyde	OC(=O)CCC=O	quantified	C4H6O3	102.032	2	Metabolite
HMDB0001260	2-amino-5-[(E)-[amino({5-[({[({[5-(6-amino-9H-purin-9-yl)-3,4-dihydroxyoxolan-2-yl]methoxy}(hydroxy)phosphoryl)oxy](hydroxy)phosphoryl}oxy)methyl]-3,4-dihydroxyoxolan-2-yl}amino)methylidene]amino]pentanoic acid	ADP-Ribosyl-L-arginine	NC(CCC\N=C(/N)NC1OC(COP(O)(=O)OP(O)(=O)OCC2OC(C(O)C2O)N2C=NC3=C(N)N=CN=C23)C(O)C1O)C(O)=O	expected	C21H35N9O15P2	715.173	10	Metabolite
HMDB0001261	3-[9,14,20-tris(2-carboxyethyl)-5,10,15,19-tetramethyl-21,22,23,24-tetraazapentacyclo[16.2.1.1^{3,6}.1^{8,11}.1^{13,16}]tetracosa-1(20),3,5,8,10,13,15,18-octaen-4-yl]propanoic acid	Coproporphyrinogen III	CC1=C2CC3=C(C)C(CCC(O)=O)=C(CC4=C(CCC(O)=O)C(C)=C(CC5=C(CCC(O)=O)C(C)=C(CC(N2)=C1CCC(O)=O)N5)N4)N3	expected	C36H44N4O8	660.316	17	Metabolite
HMDB0001262	(2R,3R,4S,5S,6R)-2-{[(2R,3S,4R,5R,6R)-4,5-dihydroxy-2-(hydroxymethyl)-6-{[(2R,3S,4R,5R)-4,5,6-trihydroxy-2-(hydroxymethyl)oxan-3-yl]oxy}oxan-3-yl]oxy}-6-(hydroxymethyl)oxane-3,4,5-triol	Maltotriose	OC[C@H]1O[C@H](O[C@H]2[C@H](O)[C@@H](O)[C@@H](O[C@H]3[C@H](O)[C@@H](O)C(O)O[C@@H]3CO)O[C@@H]2CO)[C@H](O)[C@@H](O)[C@@H]1O	quantified	C18H32O16	504.169	3	Metabolite
HMDB0001263	2-amino-6-oxohexanoic acid	Allysine	NC(CCCC=O)C(O)=O	quantified	C6H11N1O3	145.074	2	Metabolite
HMDB0001264	(5R)-5-[(1R)-1,2-dihydroxyethyl]oxolane-2,3,4-trione	Dehydroascorbic acid	[H][C@@]1(OC(=O)C(=O)C1=O)[C@H](O)CO	quantified	C6H6O6	174.016	4	Metabolite
HMDB0001265	{[(3S,4R,5S,6S)-3,4,5-trihydroxy-6-methyloxan-2-yl]oxy}phosphonic acid	Fucose 1-phosphate	C[C@@H]1OC(OP(O)(O)=O)[C@@H](O)[C@H](O)[C@@H]1O	expected	C6H13O8P1	244.035	1	Metabolite
HMDB0001266	(3S,4S,5R)-1,3,4,5,6-pentahydroxyhexan-2-one	L-Sorbose	OC[C@@]1(O)OC[C@H](O)[C@@H](O)[C@@H]1O	quantified	C6H12O6	180.063	1	Metabolite
HMDB0001267	4-oxo-4-(pyridin-3-yl)butanamide	4-Oxo-4-(3-pyridyl)-butanamide	NC(=O)CCC(=O)C1=CN=CC=C1	expected	C9H10N2O2	178.074	6	Metabolite
HMDB0001268	(2Z)-4,6-dioxooct-2-enedioic acid	4-Fumarylacetoacetic acid	OC(=O)CC(=O)CC(=O)\C=C\C(O)=O	expected	C8H8O6	200.032	5	Metabolite
HMDB0001269	(2S)-3-{[2-(3-{3-[({[({[(2R,3S,4R,5R)-5-(6-amino-9H-purin-9-yl)-4-hydroxy-3-(phosphonooxy)oxolan-2-yl]methoxy}(hydroxy)phosphoryl)oxy](hydroxy)phosphoryl}oxy)methyl]-2-hydroxy-3-methylbutanamido}propanamido)ethyl]sulfanyl}-2-methyl-3-oxopropanoic acid	Methylmalonyl-CoA	C[C@@H](C(O)=O)C(=O)SCCNC(=O)CCNC(=O)C(O)C(C)(C)COP(O)(=O)OP(O)(=O)OC[C@H]1O[C@H]([C@H](O)[C@@H]1OP(O)(O)=O)N1C=NC2=C1N=CN=C2N	expected	C25H40N7O19P3S1	867.131	11	Metabolite
HMDB0001270	{[2-hydroxy-3-(phosphonooxy)propanoyl]oxy}phosphonic acid	Glyceric acid 1,3-biphosphate	OC(COP(O)(O)=O)C(=O)OP(O)(O)=O	quantified	C3H8O10P2	265.959	1	Metabolite
HMDB0001271	{[(2R,3S,4R,5S)-5-(2,4-dioxo-1,2,3,4-tetrahydropyrimidin-5-yl)-3,4-dihydroxyoxolan-2-yl]methoxy}phosphonic acid	Pseudouridine 5'-phosphate	O[C@H]1[C@@H](O)[C@@H](O[C@@H]1COP(O)(O)=O)C1=CNC(=O)NC1=O	expected	C9H13N2O9P1	324.036	5	Metabolite
HMDB0001272	1-[(2S,3R,4S,5S,6S)-6-carboxylato-3,4,5-trihydroxyoxan-2-yl]-3-[(2S)-1-methylpyrrolidin-2-yl]-1<U+03BB>5-pyridin-1-ylium	Nicotine glucuronide	CN1CCC[C@H]1C1=C[N+](=CC=C1)[C@H]1O[C@@H]([C@@H](O)[C@H](O)[C@H]1O)C([O-])=O	expected	C16H22N2O6	338.148	7	Metabolite
HMDB0001273	({[({[(2R,3S,4R,5R)-5-(2-amino-6-oxo-6,9-dihydro-1H-purin-9-yl)-3,4-dihydroxyoxolan-2-yl]methoxy}(hydroxy)phosphoryl)oxy](hydroxy)phosphoryl}oxy)phosphonic acid	Guanosine triphosphate	NC1=NC2=C(N=CN2[C@@H]2O[C@H](COP(O)(=O)OP(O)(=O)OP(O)(O)=O)[C@@H](O)[C@H]2O)C(=O)N1	quantified	C10H16N5O14P3	522.991	7	Metabolite
HMDB0001274	{[hydroxy({[(2R,3S,5R)-3-hydroxy-5-(5-methyl-2,4-dioxo-1,2,3,4-tetrahydropyrimidin-1-yl)oxolan-2-yl]methoxy})phosphoryl]oxy}phosphonic acid	dTDP	CC1=CN([C@H]2C[C@H](O)[C@@H](COP(O)(=O)OP(O)(O)=O)O2)C(=O)NC1=O	expected	C10H16N2O11P2	402.023	5	Metabolite
HMDB0001275	{[(2R,3S,4R,5R)-5-(6-amino-9H-purin-9-yl)-4-hydroxy-2-({[hydroxy({[hydroxy({3-hydroxy-2,2-dimethyl-3-[(2-{[2-(propanoylsulfanyl)ethyl]carbamoyl}ethyl)carbamoyl]propoxy})phosphoryl]oxy})phosphoryl]oxy}methyl)oxolan-3-yl]oxy}phosphonic acid	Propionyl-CoA	CCC(=O)SCCNC(=O)CCNC(=O)C(O)C(C)(C)COP(O)(=O)OP(O)(=O)OC[C@H]1O[C@H]([C@H](O)[C@@H]1OP(O)(O)=O)N1C=NC2=C1N=CN=C2N	expected	C24H40N7O17P3S1	823.141	10	Metabolite
HMDB0001276	N-{3-[(4-aminobutyl)amino]propyl}acetamide	N1-Acetylspermidine	CC(=O)NCCCNCCCCN	quantified	C9H21N3O1	187.168	1	Metabolite
HMDB0001278	[({[(1S,2S,3S)-2-[(3E)-4,8-dimethylnona-3,7-dien-1-yl]-2-methyl-3-[(1E,5E)-2,6,10-trimethylundeca-1,5,9-trien-1-yl]cyclopropyl]methoxy}(hydroxy)phosphoryl)oxy]phosphonic acid	Presqualene diphosphate	CC(C)=CCC\C(C)=C\CC\C(C)=C\[C@@]1([H])[C@]([H])(COP(O)(=O)OP(O)(O)=O)[C@@]1(C)CC\C=C(/C)CCC=C(C)C	expected	C30H52O7P2	586.319	6	Metabolite
HMDB0001280	(2E,4Z)-2-amino-6-oxohexa-2,4-dienoic acid	2-Aminomuconic acid semialdehyde	N\C(=C\C=C/C=O)C(O)=O	expected	C6H7N1O3	141.043	4	Metabolite
HMDB0001282	{[(2R,3S,4R,5R)-5-(6-amino-9H-purin-9-yl)-3,4-dihydroxyoxolan-2-yl]methoxy}({[({[({[({[(2R,3S,4R,5R)-5-(6-amino-9H-purin-9-yl)-3,4-dihydroxyoxolan-2-yl]methoxy}(hydroxy)phosphoryl)oxy](hydroxy)phosphoryl}oxy)(hydroxy)phosphoryl]oxy}(hydroxy)phosphoryl)oxy](hydroxy)phosphoryl}oxy)phosphinic acid	Diadenosine hexaphosphate	NC1=C2N=CN([C@@H]3O[C@H](COP(O)(=O)OP(O)(=O)OP(O)(=O)OP(O)(=O)OP(O)(=O)OP(O)(=O)OC[C@H]4O[C@H]([C@H](O)[C@@H]4O)N4C=NC5=C(N)N=CN=C45)[C@@H](O)[C@H]3O)C2=NC=N1	quantified	C20H30N10O25P6	995.981	14	Metabolite
HMDB0001285	[({[(2E)-3,7-dimethylocta-2,6-dien-1-yl]oxy}(hydroxy)phosphoryl)oxy]phosphonic acid	Geranyl-PP	CC(C)=CCC\C(C)=C\CO[P@@](=O)(O)OP(=O)(O)O	expected	C10H20O7P2	314.068	2	Metabolite
HMDB0001286	(2S,5S,7R,11R,15R)-2,6,6,15-tetramethyl-14-[(2R)-6-methylhept-5-en-2-yl]tetracyclo[8.7.0.0?7.0????????,?]heptadec-1(10)-en-5-ol	4,4-Dimethyl-5a-cholesta-8,24-dien-3-b-ol	[H][C@@]12CCC([C@H](C)CCC=C(C)C)[C@@]1(C)CCC1=C2CC[C@@]2([H])C(C)(C)[C@@H](O)CC[C@]12C	expected	C29H48O1	412.371	6	Metabolite
HMDB0001290	5-{[2-(3-{3-[({[({[5-(6-amino-9H-purin-9-yl)-4-hydroxy-3-(phosphonooxy)oxolan-2-yl]methoxy}(hydroxy)phosphoryl)oxy](hydroxy)phosphoryl}oxy)methyl]-2-hydroxy-3-methylbutanamido}propanamido)ethyl]sulfanyl}-5-oxopent-3-enoic acid	Glutaconyl-CoA	CC(C)(COP(O)(=O)OP(O)(=O)OCC1OC(C(O)C1OP(O)(O)=O)N1C=NC2=C1N=CN=C2N)C(O)C(=O)NCCC(=O)NCCSC(=O)C=CCC(O)=O	expected	C26H40N7O19P3S1	879.131	12	Metabolite
HMDB0001291	{[5-(6-amino-9H-purin-9-yl)-2-{[({[(3-{[2-({2-[(2E)-dec-2-enoylsulfanyl]ethyl}carbamoyl)ethyl]carbamoyl}-3-hydroxy-2,2-dimethylpropoxy)(hydroxy)phosphoryl]oxy}(hydroxy)phosphoryl)oxy]methyl}-4-hydroxyoxolan-3-yl]oxy}phosphonic acid	trans-D-Decenoyl-CoA	CCCCCCC\C=C\C(=O)SCCNC(=O)CCNC(=O)C(O)C(C)(C)COP(O)(=O)OP(O)(=O)OCC1OC(C(O)C1OP(O)(O)=O)N1C=NC2=C(N)N=CN=C12	expected	C31H52N7O17P3S1	919.235	11	Metabolite
HMDB0001292	(2S,3S,4R)-2-(hydroxymethyl)oxolane-3,4-diol	1-Deoxy-D-xylulose	OC[C@@H]1OC[C@@H](O)[C@@H]1O	expected	C5H10O4	134.058	1	Metabolite
HMDB0001294	(2R)-2,3-bis(phosphonooxy)propanoic acid	2,3-Diphosphoglyceric acid	OC(=O)[C@@H](COP(O)(O)=O)OP(O)(O)=O	quantified	C3H8O10P2	265.959	1	Metabolite
HMDB0001295	{[(2R,3S,4R,5R)-5-(6-amino-9H-purin-9-yl)-4-hydroxy-2-({[hydroxy({hydroxy[3-hydroxy-3-({2-[(2-{[(3S,7R,11R)-2-hydroxy-3,7,11,15-tetramethylhexadecanoyl]sulfanyl}ethyl)carbamoyl]ethyl}carbamoyl)-2,2-dimethylpropoxy]phosphoryl}oxy)phosphoryl]oxy}methyl)oxolan-3-yl]oxy}phosphonic acid	2-Hydroxyphytanoyl-CoA	CC(C)CCC[C@@H](C)CCC[C@@H](C)CCC[C@H](C)C(O)C(=O)SCCNC(=O)CCNC(=O)C(O)C(C)(C)COP(O)(=O)OP(O)(=O)OC[C@H]1O[C@H]([C@H](O)[C@@H]1OP(O)(O)=O)N1C=NC2=C1N=CN=C2N	expected	C41H74N7O18P3S1	1077.4	10	Metabolite
HMDB0001296	(2R,3R,4S,5S,6R)-2-{[(2R,3S,4R,5R,6R)-6-{[(2R,3S,4R,5R,6R)-4,5-dihydroxy-2-(hydroxymethyl)-6-{[(2R,3S,4R,5R)-4,5,6-trihydroxy-2-(hydroxymethyl)oxan-3-yl]oxy}oxan-3-yl]oxy}-4,5-dihydroxy-2-(hydroxymethyl)oxan-3-yl]oxy}-6-(hydroxymethyl)oxane-3,4,5-triol	Maltotetraose	OC[C@H]1O[C@H](O[C@H]2[C@H](O)[C@@H](O)[C@@H](O[C@H]3[C@H](O)[C@@H](O)[C@@H](O[C@H]4[C@H](O)[C@@H](O)C(O)O[C@@H]4CO)O[C@@H]3CO)O[C@@H]2CO)[C@H](O)[C@@H](O)[C@@H]1O	quantified	C24H42O21	666.222	4	Metabolite
HMDB0001297	5-(pyridin-3-yl)pyrrolidin-2-one	Norcotinine	O=C1CCC(N1)C1=CN=CC=C1	quantified	C9H10N2O1	162.079	6	Metabolite
HMDB0001299	{[(3R,4S)-3,4-dihydroxy-5-(methylsulfanyl)-2-oxopentyl]oxy}phosphonic acid	5-Methylthioribulose 1-phosphate	CSC[C@@H](O)[C@@H](O)C(=O)COP(O)(O)=O	expected	C6H13O7P1S1	260.012	1	Metabolite
HMDB0001301	3,4-dihydro-2H-pyrrole-2-carboxylic acid	1-Pyrroline-5-carboxylic acid	OC(=O)C1CCC=N1	expected	C5H7N1O2	113.048	3	Metabolite
HMDB0001308	{[(2R,3S,4R,5R)-3,4-dihydroxy-5-(2-formamidoacetamido)oxolan-2-yl]methoxy}phosphonic acid	5'-Phosphoribosyl-N-formylglycinamide	O[C@H]1[C@@H](O)[C@H](NC(=O)CNC=O)O[C@@H]1COP(O)(O)=O	expected	C8H15N2O9P1	314.052	3	Metabolite
HMDB0001309	2-[(3-chlorophenyl)formamido]acetic acid	m-Chlorohippuric acid	OC(=O)CNC(=O)C1=CC(Cl)=CC=C1	expected	C9Cl1H8N1O3	213.019	6	Metabolite
HMDB0001310	(2R)-2-aminopropanoic acid	D-Alanine	C[C@@H](N)C(O)=O	quantified	C3H7N1O2	89.0477	1	Metabolite
HMDB0001311	(2R)-2-hydroxypropanoic acid	D-Lactic acid	C[C@@H](O)C(O)=O	quantified	C3H6O3	90.0317	1	Metabolite
HMDB0001312	{[(2R,3S,4R,5R)-5-(6-amino-9H-purin-9-yl)-3,4-dihydroxyoxolan-2-yl]methoxy}[({[(2R,3S,4R,5S)-5-(6-amino-9H-purin-9-yl)-4-hydroxy-2-(hydroxymethyl)oxolan-3-yl]oxy}(hydroxy)phosphoryl)oxy]phosphinic acid	Diadenosine diphosphate	NC1=C2N=CN([C@@H]3O[C@H](COP(O)(=O)OP(O)(=O)O[C@@H]4[C@@H](CO)O[C@@H]([C@@H]4O)N4C=NC5=C(N)N=CN=C45)[C@@H](O)[C@H]3O)C2=NC=N1	expected	C20H26N10O13P2	676.116	14	Metabolite
HMDB0001313	{[(1S,2R,3S,4S,5S,6S)-2,3,4,5,6-pentahydroxycyclohexyl]oxy}phosphonic acid	D-Myo-inositol 4-phosphate	O[C@@H]1[C@H](O)[C@H](O)[C@@H](OP(O)(O)=O)[C@H](O)[C@H]1O	expected	C6H13O9P1	260.03	1	Metabolite
HMDB0001314	9-[(4aR,6R,7R,7aS)-2,7-dihydroxy-2-oxo-hexahydro-2<U+03BB>5-furo[3,2-d][1,3,2]dioxaphosphinin-6-yl]-2-amino-6,9-dihydro-1H-purin-6-one	Cyclic GMP	NC1=NC2=C(N=CN2[C@@H]2O[C@@H]3COP(O)(=O)O[C@H]3[C@H]2O)C(=O)N1	quantified	C10H12N5O7P1	345.047	8	Metabolite
HMDB0001315	phosphanylidyne	Phosphorus	[P]	quantified	P1	30.9738	1.5	Adduct
HMDB0001316	(2R,3S,4R,5R)-2,3,4,5-tetrahydroxy-6-(phosphonooxy)hexanoic acid	6-Phosphogluconic acid	O[C@H](COP(O)(O)=O)[C@@H](O)[C@H](O)[C@@H](O)C(O)=O	quantified	C6H13O10P1	276.025	1	Metabolite
HMDB0001318	4-methylpentanal	4-Methylpentanal	CC(C)CCC=O	expected	C6H12O1	100.089	1	Metabolite
HMDB0001319	{[5-hydroxy-4-(hydroxymethyl)-6-methylpyridin-3-yl]methoxy}phosphonic acid	Pyridoxine 5'-phosphate	CC1=NC=C(COP(O)(O)=O)C(CO)=C1O	quantified	C8H12N1O6P1	249.04	4	Metabolite
HMDB0001320	7-[(1R,2R,3R)-3-hydroxy-5-oxo-2-[(1E)-3-oxooct-1-en-1-yl]cyclopentyl]heptanoic acid	(13E)-11a-Hydroxy-9,15-dioxoprost-13-enoic acid	CCCCCC(=O)\C=C\[C@H]1[C@H](O)CC(=O)[C@@H]1CCCCCCC(O)=O	expected	C20H32O5	352.225	5	Metabolite
HMDB0001321	[(2R,3R)-2,3-dihydroxy-4-oxobutoxy]phosphonic acid	D-Erythrose 4-phosphate	O[C@H](COP(O)(O)=O)[C@@H](O)C=O	quantified	C4H9O7P1	200.009	1	Metabolite
HMDB0001322	{[(2R,3S,4R,5R)-5-(6-amino-9H-purin-9-yl)-4-hydroxy-2-({[hydroxy({[hydroxy(3-hydroxy-2,2-dimethyl-3-{[2-({2-[(9Z)-octadec-9-enoylsulfanyl]ethyl}carbamoyl)ethyl]carbamoyl}propoxy)phosphoryl]oxy})phosphoryl]oxy}methyl)oxolan-3-yl]oxy}phosphonic acid	Oleoyl-CoA	CCCCCCCC\C=C/CCCCCCCC(=O)SCCNC(=O)CCNC(=O)C(O)C(C)(C)COP(O)(=O)OP(O)(=O)OC[C@H]1O[C@H]([C@H](O)[C@@H]1OP(O)(O)=O)N1C=NC2=C1N=CN=C2N	expected	C39H68N7O17P3S1	1031.36	11	Metabolite
HMDB0001324	(5S)-1-(hydroxymethyl)-5-(pyridin-3-yl)pyrrolidin-2-one	N'-Hydroxymethylnorcotinine	OCN1[C@@H](CCC1=O)C1=CN=CC=C1	expected	C10H12N2O2	192.09	6	Metabolite
HMDB0001325	(2S)-2-amino-6-(trimethylazaniumyl)hexanoate	N6,N6,N6-Trimethyl-L-lysine	C[N+](C)(C)CCCC[C@H](N)C([O-])=O	quantified	C9H20N2O2	188.152	1	Metabolite
HMDB0001328	{[hydroxy({[(3R,4S,5S,6R)-3,4,5-trihydroxy-6-(hydroxymethyl)oxan-2-yl]oxy})phosphoryl]oxy}({[(2R,3S,5R)-3-hydroxy-5-(5-methyl-2,4-dioxo-1,2,3,4-tetrahydropyrimidin-1-yl)oxolan-2-yl]methoxy})phosphinic acid	dTDP-D-glucose	CC1=CN([C@H]2C[C@H](O)[C@@H](COP(O)(=O)OP(O)(=O)OC3O[C@H](CO)[C@@H](O)[C@H](O)[C@H]3O)O2)C(=O)NC1=O	expected	C16H26N2O16P2	564.076	6	Metabolite
HMDB0001329	(2R)-1-methyl-2-(pyridin-3-yl)pyrrolidin-2-ol	2'-Hydroxynicotine	CN1CCC[C@@]1(O)C1=CC=CN=C1	expected	C10H14N2O1	178.111	5	Metabolite
HMDB0001330	(2Z)-2-amino-3-[(1Z)-3-oxoprop-1-en-1-yl]but-2-enedioic acid	2-Amino-3-carboxymuconic acid semialdehyde	N\C(C(O)=O)=C(\C=C/C=O)/C(O)=O	expected	C7H7N1O5	185.032	5	Metabolite
HMDB0001333	manganese(2+) ion	Manganese	[Mn++]	quantified	H-2Mn1	52.9224	2	Adduct
HMDB0001335	5-[(3aR,4R,5R,6aS)-5-hydroxy-4-[(1E,3S)-3-hydroxyoct-1-en-1-yl]-hexahydro-2H-cyclopenta[b]furan-2-ylidene]pentanoic acid	Prostaglandin I2	CCCCC[C@H](O)\C=C\[C@H]1[C@H](O)C[C@@H]2OC(C[C@H]12)=CCCCC(O)=O	expected	C20H32O5	352.225	5	Metabolite
HMDB0001336	2-(3,4-dihydroxyphenyl)acetic acid	3,4-Dihydroxybenzeneacetic acid	OC(=O)CC1=CC(O)=C(O)C=C1	quantified	C8H8O4	168.042	5	Metabolite
HMDB0001337	4-[(2S,3S)-3-[(1E,3E,5Z,8Z)-tetradeca-1,3,5,8-tetraen-1-yl]oxiran-2-yl]butanoic acid	Leukotriene A4	CCCCC\C=C/C\C=C/C=C/C=C/[C@@H]1O[C@H]1CCCC(O)=O	expected	C20H30O3	318.219	6	Metabolite
HMDB0001338	{[(2R,3S,4R,5R)-5-(6-amino-9H-purin-9-yl)-2-[({[({3-[(2-{[2-(hexadecanoylsulfanyl)ethyl]carbamoyl}ethyl)carbamoyl]-3-hydroxy-2,2-dimethylpropoxy}(hydroxy)phosphoryl)oxy](hydroxy)phosphoryl}oxy)methyl]-4-hydroxyoxolan-3-yl]oxy}phosphonic acid	Palmityl-CoA	CCCCCCCCCCCCCCCC(=O)SCCNC(=O)CCNC(=O)C(O)C(C)(C)COP(O)(=O)OP(O)(=O)OC[C@H]1O[C@H]([C@H](O)[C@@H]1OP(O)(O)=O)N1C=NC2=C1N=CN=C2N	expected	C37H66N7O17P3S1	1005.34	10	Metabolite
HMDB0001339	5-{[2-(3-{3-[({[({[(2R,3S,4R,5R)-5-(6-amino-9H-purin-9-yl)-4-hydroxy-3-(phosphonooxy)oxolan-2-yl]methoxy}(hydroxy)phosphoryl)oxy](hydroxy)phosphoryl}oxy)methyl]-2-hydroxy-3-methylbutanamido}propanamido)ethyl]sulfanyl}-5-oxopentanoic acid	Glutaryl-CoA	CC(C)(COP(O)(=O)OP(O)(=O)OC[C@H]1O[C@H]([C@H](O)[C@@H]1OP(O)(O)=O)N1C=NC2=C1N=CN=C2N)C(O)C(=O)NCCC(=O)NCCSC(=O)CCCC(O)=O	detected	C26H42N7O19P3S1	881.147	11	Metabolite
HMDB0001340	{[(2R,3S,4R,5R)-5-(2-amino-6-oxo-6,9-dihydro-1H-purin-9-yl)-3,4-dihydroxyoxolan-2-yl]methoxy}({[({[({[(2R,3S,4R,5R)-5-(2-amino-6-oxo-6,9-dihydro-1H-purin-9-yl)-3,4-dihydroxyoxolan-2-yl]methoxy}(hydroxy)phosphoryl)oxy](hydroxy)phosphoryl}oxy)(hydroxy)phosphoryl]oxy})phosphinic acid	Diguanosine tetraphosphate	NC1=NC2=C(N=CN2[C@@H]2O[C@H](COP(O)(=O)OP(O)(=O)OP(O)(=O)OP(O)(=O)OC[C@H]3O[C@H]([C@H](O)[C@@H]3O)N3C=NC4=C3N=C(N)NC4=O)[C@@H](O)[C@H]2O)C(=O)N1	expected	C20H28N10O21P4	868.038	14	Metabolite
HMDB0001341	[({[(2R,3S,4R,5R)-5-(6-amino-9H-purin-9-yl)-3,4-dihydroxyoxolan-2-yl]methoxy}(hydroxy)phosphoryl)oxy]phosphonic acid	ADP	NC1=NC=NC2=C1N=CN2[C@@H]1O[C@H](COP(O)(=O)OP(O)(O)=O)[C@@H](O)[C@H]1O	quantified	C10H15N5O10P2	427.029	7	Metabolite
HMDB0001342	{[hydroxy({[hydroxy({[(2R,3S,5R)-3-hydroxy-5-(5-methyl-2,4-dioxo-1,2,3,4-tetrahydropyrimidin-1-yl)oxolan-2-yl]methoxy})phosphoryl]oxy})phosphoryl]oxy}phosphonic acid	Thymidine 5'-triphosphate	CC1=CN([C@H]2C[C@H](O)[C@@H](COP(O)(=O)OP(O)(=O)OP(O)(O)=O)O2)C(=O)NC1=O	expected	C10H17N2O14P3	481.989	5	Metabolite
HMDB0001343	(3R)-3-hydroxy-3-methyl-5-(phosphonooxy)pentanoic acid	Mevalonic acid-5P	C[C@@](O)(CCOP(O)(O)=O)CC(O)=O	expected	C6H13O7P1	228.04	1	Metabolite
HMDB0001345	trimethyl(4-oxobutyl)azanium	4-Trimethylammoniobutanal	C[N+](C)(C)CCCC=O	expected	C7H15N1O1	129.115	1	Metabolite
HMDB0001346	[({[(2R,3S,4R,5R)-5-(2-amino-6-oxo-6,9-dihydro-1H-purin-9-yl)-3,4-dihydroxyoxolan-2-yl]methoxy}(hydroxy)phosphoryl)oxy]({[(2R,3S,4R,6R)-3,4-dihydroxy-6-methyl-5-oxooxan-2-yl]oxy})phosphinic acid	GDP-4-Dehydro-6-deoxy-D-mannose	C[C@H]1O[C@H](OP(O)(=O)OP(O)(=O)OC[C@H]2O[C@H]([C@H](O)[C@@H]2O)N2C=NC3=C2N=C(N)NC3=O)[C@@H](O)[C@@H](O)C1=O	expected	C16H23N5O15P2	587.067	9	Metabolite
HMDB0001347	({hydroxy[(3-methylbut-3-en-1-yl)oxy]phosphoryl}oxy)phosphonic acid	Isopentenyl pyrophosphate	CC(=C)CCO[P@](O)(=O)OP(O)(O)=O	expected	C5H12O7P2	246.006	1	Metabolite
HMDB0001348	{[(2S,3R,4E)-3-hydroxy-2-octadecanamidooctadec-4-en-1-yl]oxy}[2-(trimethylazaniumyl)ethoxy]phosphinic acid	SM(d18:1/18:0)	CCCCCCCCCCCCCCCCCC(=O)N[C@@]([H])(COP(O)(=O)OCC[N+](C)(C)C)[C@]([H])(O)\C=C\CCCCCCCCCCCCC	quantified	C41H83N2O6P1	730.599	2	Metabolite
HMDB0001349	selandiylium	Selenium	[Se++]	quantified	H-2Se1	77.9009	2	Adduct
HMDB0001351	{[(4S,5R)-4-hydroxy-5-(hydroxymethyl)oxolan-2-yl]oxy}phosphonic acid	Deoxyribose 1-phosphate	OC[C@H]1OC(C[C@@H]1O)OP(O)(O)=O	expected	C5H11O7P1	214.024	1	Metabolite
HMDB0001352	3-hydroxy-2-oxopropanoic acid	Hydroxypyruvic acid	OCC(=O)C(O)=O	quantified	C3H4O4	104.011	2	Metabolite
HMDB0001353	(4R,5R)-4,5,6-trihydroxy-2-oxohexanoic acid	2-Keto-3-deoxy-D-gluconic acid	OC[C@@H](O)[C@H](O)CC(=O)C(O)=O	expected	C6H10O6	178.048	2	Metabolite
HMDB0001354	(6aR)-3-amino-8-(4-{[(1S)-3-carboxy-1-carboxylatopropyl]carbamoyl}phenyl)-1-oxo-1H,4H,5H,6H,6aH,7H,8H-10<U+03BB>5-imidazo[1,5-f]pteridin-10-ylium	5,10-Methenyltetrahydrofolic acid	[H][C@@]12CN(C=[N+]1C1=C(NC2)NC(N)=NC1=O)C1=CC=C(C=C1)C(=O)N[C@@H](CCC(O)=O)C([O-])=O	expected	C20H21N7O6	455.155	14	Metabolite
HMDB0001355	O,O-diethyl O-4-nitrophenyl phosphorothioate	Parathion	CCOP(=S)(OCC)OC1=CC=C(C=C1)[N+]([O-])=O	quantified	C10H14N1O5P1S1	291.033	5	Metabolite
HMDB0001356	{[(2R,3S,4R,5R)-5-(6-amino-9H-purin-9-yl)-4-hydroxy-2-({[hydroxy({hydroxy[3-hydroxy-3-({2-[(2-{[(2S,3S)-3-hydroxy-2-methylbutanoyl]sulfanyl}ethyl)carbamoyl]ethyl}carbamoyl)-2,2-dimethylpropoxy]phosphoryl}oxy)phosphoryl]oxy}methyl)oxolan-3-yl]oxy}phosphonic acid	2-Methyl-3-hydroxybutyryl-CoA	C[C@H](O)[C@H](C)C(=O)SCCNC(=O)CCNC(=O)C(O)C(C)(C)COP(O)(=O)OP(O)(=O)OC[C@H]1O[C@H]([C@H](O)[C@@H]1OP(O)(O)=O)N1C=NC2=C1N=CN=C2N	expected	C26H44N7O18P3S1	867.168	10	Metabolite
HMDB0001358	(2Z,4E,6E,8E)-3,7-dimethyl-9-(2,6,6-trimethylcyclohex-1-en-1-yl)nona-2,4,6,8-tetraenal	Retinal	C\C(\C=C\C=C(/C)\C=C\C1=C(C)CCCC1(C)C)=C/C=O	quantified	C20H28O1	284.214	7	Metabolite
HMDB0001359	{[(2R,3S,4R,5R)-5-(6-amino-9H-purin-9-yl)-4-hydroxy-2-({[hydroxy({hydroxy[3-hydroxy-2,2-dimethyl-3-({2-[(2-{[(3S,7R,11R)-3,7,11,15-tetramethylhexadecanoyl]sulfanyl}ethyl)carbamoyl]ethyl}carbamoyl)propoxy]phosphoryl}oxy)phosphoryl]oxy}methyl)oxolan-3-yl]oxy}phosphonic acid	Phytanoyl-CoA	CC(C)CCC[C@@H](C)CCC[C@@H](C)CCC[C@H](C)CC(=O)SCCNC(=O)CCNC(=O)C(O)C(C)(C)COP(O)(=O)OP(O)(=O)OC[C@H]1O[C@H]([C@H](O)[C@@H]1OP(O)(O)=O)N1C=NC2=C1N=CN=C2N	expected	C41H74N7O17P3S1	1061.41	10	Metabolite
HMDB0001364	{[({[({[(2R,3S,4R,5R)-5-(6-amino-9H-purin-9-yl)-3,4-dihydroxyoxolan-2-yl]methoxy}(hydroxy)phosphoryl)oxy](hydroxy)phosphoryl}oxy)(hydroxy)phosphoryl]oxy}phosphonic acid	Adenosine tetraphosphate	NC1=NC=NC2=C1N=CN2[C@@H]1O[C@H](COP(O)(=O)OP(O)(=O)OP(O)(=O)OP(O)(O)=O)[C@@H](O)[C@H]1O	expected	C10H17N5O16P4	586.962	7	Metabolite
HMDB0001365	1-methyl-3-(1-methyl-5-oxopyrrolidin-2-yl)pyridin-1-ium	Cotinine methonium ion	CN1C(CCC1=O)C1=C[N+](C)=CC=C1	expected	C11H14N2O1	190.111	6	Metabolite
HMDB0001366	7H-purine	Purine	N1C=NC2=C1C=NC=N2	detected	C5H4N4	120.044	6	Metabolite
HMDB0001367	{[(3R,4R,5S,6R)-3-acetamido-4,5-dihydroxy-6-(hydroxymethyl)oxan-2-yl]oxy}phosphonic acid	N-Acetyl-glucosamine 1-phosphate	CC(=O)N[C@@H]1[C@@H](O)[C@H](O)[C@@H](CO)OC1OP(O)(O)=O	quantified	C8H16N1O9P1	301.056	2	Metabolite
HMDB0001368	2-oxo-3-sulfanylpropanoic acid	3-Mercaptopyruvic acid	OC(=O)C(=O)CS	quantified	C3H4O3S1	119.988	2	Metabolite
HMDB0001369	4-hydroxy-3,4-dihydro-2H-pyrrole-2-carboxylic acid	Pyrroline hydroxycarboxylic acid	OC1CC(N=C1)C(O)=O	detected	C5H7N1O3	129.043	3	Metabolite
HMDB0001370	(2S,6S)-2,6-diaminoheptanedioic acid	Diaminopimelic acid	N[C@@H](CCC[C@H](N)C(O)=O)C(O)=O	quantified	C7H14N2O4	190.095	2	Metabolite
HMDB0001372	3-[(4-amino-2-methylpyrimidin-5-yl)methyl]-5-(2-{[hydroxy(phosphonooxy)phosphoryl]oxy}ethyl)-4-methyl-1,3-thiazol-3-ium	Thiamine pyrophosphate	CC1=C(CCO[P@](O)(=O)OP(O)(O)=O)SC=[N+]1CC1=CN=C(C)N=C1N	quantified	C12H18N4O7P2S1	424.037	7	Metabolite
HMDB0001373	[({[(2R,3S,4R,5R)-5-(6-amino-9H-purin-9-yl)-3,4-dihydroxyoxolan-2-yl]methoxy}(hydroxy)phosphoryl)oxy][3-hydroxy-2,2-dimethyl-3-({2-[(2-sulfanylethyl)carbamoyl]ethyl}carbamoyl)propoxy]phosphinic acid	Dephospho-CoA	CC(C)(COP(O)(=O)OP(O)(=O)OC[C@H]1O[C@H]([C@H](O)[C@@H]1O)N1C=NC2=C1N=CN=C2N)C(O)C(=O)NCCC(=O)NCCS	expected	C21H35N7O13P2S1	687.149	9	Metabolite
HMDB0001374	{[(2R,3S,4R,5R)-5-(6-amino-9H-purin-9-yl)-4-hydroxy-2-({[hydroxy({[hydroxy({3-hydroxy-2,2-dimethyl-3-[(2-{[2-({4-[(1S,5R,9R,11S,16S)-5,9,16-trihydroxy-2,15-dimethyltetracyclo[8.7.0.0?7.0????????,?]heptadecan-14-yl]pentanoyl}sulfanyl)ethyl]carbamoyl}ethyl)carbamoyl]propoxy})phosphoryl]oxy})phosphoryl]oxy}methyl)oxolan-3-yl]oxy}phosphonic acid	Choloyl-CoA	[H][C@@]12CCC(C(C)CCC(=O)SCCNC(=O)CCNC(=O)C(O)C(C)(C)COP(O)(=O)OP(O)(=O)OC[C@H]3O[C@H]([C@H](O)[C@@H]3OP(O)(O)=O)N3C=NC4=C3N=CN=C4N)C1(C)[C@@H](O)C[C@@]1([H])C2[C@H](O)CC2C[C@H](O)CCC12C	expected	C45H74N7O20P3S1	1157.39	14	Metabolite
HMDB0001375	(3S)-5-{[2-(3-{3-[({[({[(2R,3S,4R,5R)-5-(6-amino-9H-purin-9-yl)-4-hydroxy-3-(phosphonooxy)oxolan-2-yl]methoxy}(hydroxy)phosphoryl)oxy](hydroxy)phosphoryl}oxy)methyl]-2-hydroxy-3-methylbutanamido}propanamido)ethyl]sulfanyl}-3-hydroxy-3-methyl-5-oxopentanoic acid	3-Hydroxy-3-methylglutaryl-CoA	C[C@](O)(CC(O)=O)CC(=O)SCCNC(=O)CCNC(=O)C(O)C(C)(C)COP(O)(=O)OP(O)(=O)OC[C@H]1O[C@H]([C@H](O)[C@@H]1OP(O)(O)=O)N1C=NC2=C1N=CN=C2N	expected	C27H44N7O20P3S1	911.157	11	Metabolite
HMDB0001376	(4S,5R)-4,5-dihydroxy-2-oxo-6-(phosphonooxy)hexanoic acid	2-Keto-3-deoxy-6-phosphogluconic acid	O[C@H](COP(O)(O)=O)[C@@H](O)CC(=O)C(O)=O	expected	C6H11O9P1	258.014	2	Metabolite
HMDB0001377	oxidanone	Oxygen	O=O	quantified	O2	31.9898	1	Adduct
HMDB0001379	{[(2R,3S,4R,5R)-5-(2-amino-6-oxo-6,9-dihydro-3H-purin-9-yl)-3,4-dihydroxyoxolan-2-yl]methoxy}({[({[(2R,3S,4R,5R)-5-(2-amino-6-oxo-6,9-dihydro-3H-purin-9-yl)-3,4-dihydroxyoxolan-2-yl]methoxy}(hydroxy)phosphoryl)oxy](hydroxy)phosphoryl}oxy)phosphinic acid	Diguanosine triphosphate	NC1=NC(=O)C2=C(N1)N(C=N2)[C@@H]1O[C@H](COP(O)(=O)OP(O)(=O)OP(O)(=O)OC[C@H]2O[C@H]([C@H](O)[C@@H]2O)N2C=NC3=C2NC(N)=NC3=O)[C@@H](O)[C@H]1O	expected	C20H27N10O18P3	788.072	14	Metabolite
HMDB0001380	{[(2S,3R,4S,5S)-5-(2-amino-6-oxo-6,9-dihydro-3H-purin-9-yl)-3,4-dihydroxyoxolan-2-yl]methoxy}[({[({[({[(2R,3S,4R,5R)-5-(2-amino-6-oxo-6,9-dihydro-3H-purin-9-yl)-3,4-dihydroxyoxolan-2-yl]methoxy}(hydroxy)phosphoryl)oxy](hydroxy)phosphoryl}oxy)(hydroxy)phosphoryl]oxy}(hydroxy)phosphoryl)oxy]phosphinic acid	Diguanosine pentaphosphate	NC1=NC(=O)C2=C(N1)N(C=N2)[C@H]1O[C@@H](CO[P@](O)(=O)O[P@](O)(=O)O[P@](O)(=O)O[P@@](O)(=O)O[P@](O)(=O)OC[C@H]2O[C@H]([C@H](O)[C@@H]2O)N2C=NC3=C2NC(N)=NC3=O)[C@H](O)[C@@H]1O	expected	C20H29N10O24P5	948.004	14	Metabolite
HMDB0001381	(5Z)-7-[(1R,4S,5R,6R)-6-[(1E,3S)-3-hydroxyoct-1-en-1-yl]-2,3-dioxabicyclo[2.2.1]heptan-5-yl]hept-5-enoic acid	Prostaglandin H2	CCCCC[C@H](O)\C=C\[C@H]1[C@H]2C[C@H](OO2)[C@@H]1C\C=C/CCCC(O)=O	expected	C20H32O5	352.225	5	Metabolite
HMDB0001382	3-methylbutyl nitrite	Vaporole	CC(C)CCON=O	expected	C5H11N1O2	117.079	1	Metabolite
HMDB0001383	{[(2S,3R)-2-amino-3-hydroxyoctadecyl]oxy}phosphonic acid	Sphinganine 1-phosphate	CCCCCCCCCCCCCCC[C@@H](O)[C@@H](N)COP(O)(O)=O	quantified	C18H40N1O5P1	381.264	0	Metabolite
HMDB0001385	(2R,3S,5S,6R)-2,3,5-trihydroxy-6-(hydroxymethyl)oxan-4-one	3-Keto-b-D-galactose	OC[C@H]1O[C@@H](O)[C@H](O)C(=O)[C@H]1O	expected	C6H10O6	178.048	2	Metabolite
HMDB0001387	2-(methylamino)-1-phenylethan-1-ol	N-Methylphenylethanolamine	CNCC(O)C1=CC=CC=C1	expected	C9H13N1O1	151.1	4	Metabolite
HMDB0001388	(9Z,12Z,15Z)-octadeca-9,12,15-trienoic acid	Alpha-Linolenic acid	CC\C=C/C\C=C/C\C=C/CCCCCCCC(O)=O	quantified	C18H30O2	278.225	4	Metabolite
HMDB0001389	N-[2-(5-methoxy-1H-indol-3-yl)ethyl]acetamide	Melatonin	COC1=CC=C2NC=C(CCNC(C)=O)C2=C1	quantified	C13H16N2O2	232.121	7	Metabolite
HMDB0001390	(5S)-3-hydroxy-1-methyl-5-(pyridin-3-yl)pyrrolidin-2-one	Hydroxycotinine	CN1[C@@H](CC(O)C1=O)C1=CN=CC=C1	quantified	C10H12N2O2	192.09	6	Metabolite
HMDB0001391	[({[(3S,4R,5R)-5-(2-amino-6-oxo-6,9-dihydro-1H-purin-9-yl)-3,4-dihydroxyoxolan-2-yl]methoxy}(hydroxy)phosphoryl)oxy]({[(3S,4S,6S)-3,4-dihydroxy-6-methyl-5-oxooxan-2-yl]oxy})phosphinic acid	GDP-4-Dehydro-6-L-deoxygalactose	C[C@@H]1OC(OP(O)(=O)OP(O)(=O)OCC2O[C@H]([C@H](O)[C@@H]2O)N2C=NC3=C2N=C(N)NC3=O)[C@@H](O)[C@H](O)C1=O	expected	C16H23N5O15P2	587.067	9	Metabolite
HMDB0001392	4-aminobenzoic acid	p-Aminobenzoic acid	NC1=CC=C(C=C1)C(O)=O	quantified	C7H7N1O2	137.048	5	Metabolite
HMDB0001396	(2R)-2-[(4-{[(2-amino-5-methyl-4-oxo-3,4,5,6,7,8-hexahydropteridin-6-yl)methyl]amino}phenyl)formamido]pentanedioic acid	5-Methyltetrahydrofolic acid	CN1C(CNC2=CC=C(C=C2)C(=O)N[C@H](CCC(O)=O)C(O)=O)CNC2=C1C(=O)NC(N)=N2	quantified	C20H25N7O6	459.187	12	Metabolite
HMDB0001397	{[(2R,3S,4R,5R)-5-(2-amino-6-oxo-6,9-dihydro-1H-purin-9-yl)-3,4-dihydroxyoxolan-2-yl]methoxy}phosphonic acid	Guanosine monophosphate	NC1=NC2=C(N=CN2[C@@H]2O[C@H](COP(O)(O)=O)[C@@H](O)[C@H]2O)C(=O)N1	quantified	C10H14N5O8P1	363.058	7	Metabolite
HMDB0001398	2-methoxyphenol	Guaiacol	COC1=C(O)C=CC=C1	quantified	C7H8O2	124.052	4	Metabolite
HMDB0001399	{[(3R,4R,6R)-3,4-dihydroxy-6-methyl-5-oxooxan-2-yl]oxy}({[hydroxy({[(2R,3S,5R)-3-hydroxy-5-(5-methyl-2,4-dioxo-1,2,3,4-tetrahydropyrimidin-1-yl)oxolan-2-yl]methoxy})phosphoryl]oxy})phosphinic acid	4,6-Dideoxy-4-oxo-dTDP-D-glucose	C[C@H]1OC(OP(O)(=O)OP(O)(=O)OC[C@H]2O[C@H](C[C@@H]2O)N2C=C(C)C(=O)NC2=O)[C@H](O)[C@@H](O)C1=O	expected	C16H24N2O15P2	546.065	7	Metabolite
HMDB0001401	{[(2R,3S,4S,5R)-3,4,5,6-tetrahydroxyoxan-2-yl]methoxy}phosphonic acid	Glucose 6-phosphate	OC1O[C@H](COP(O)(O)=O)[C@@H](O)[C@H](O)[C@H]1O	quantified	C6H13O9P1	260.03	1	Metabolite
HMDB0001403	(5Z)-7-[(1R,2R,5S)-5-hydroxy-2-[(1E,3S)-3-hydroxyoct-1-en-1-yl]-3-oxocyclopentyl]hept-5-enoic acid	Prostaglandin D2	[H][C@](O)(CCCCC)\C=C\[C@@]1([H])C(=O)C[C@]([H])(O)[C@]1([H])C\C=C/CCCC(O)=O	quantified	C20H32O5	352.225	5	Metabolite
HMDB0001405	2-oxo-3-sulfinopropanoic acid	3-Sulfinylpyruvic acid	OC(=O)C(=O)CS(O)=O	expected	C3H4O5S1	151.978	2	Metabolite
HMDB0001406	pyridine-3-carboxamide	Niacinamide	NC(=O)C1=CC=CN=C1	quantified	C6H6N2O1	122.048	5	Metabolite
HMDB0001409	{[(2R,3S,5R)-5-(2,4-dioxo-1,2,3,4-tetrahydropyrimidin-1-yl)-3-hydroxyoxolan-2-yl]methoxy}phosphonic acid	dUMP	O[C@H]1C[C@@H](O[C@@H]1COP(O)(O)=O)N1C=CC(=O)NC1=O	expected	C9H13N2O8P1	308.041	5	Metabolite
HMDB0001410	1-(2-amino-7,8-dihydroxy-4-oxo-3,4,7,8-tetrahydropteridin-6-yl)propane-1,2-dione	2-Amino-4-oxo-6-(1',2'-dioxoprolyl)-7,8-dihydroxypteridine	CC(=O)C(=O)C1=NC2=C(N=C(N)NC2=O)N(O)C1O	expected	C9H9N5O5	267.06	8	Metabolite
HMDB0001411	3-[(2S)-1-methyl-5-oxopyrrolidin-2-yl]pyridin-1-ium-1-olate	Cotinine N-oxide	CN1[C@@H](CCC1=O)C1=C[N+]([O-])=CC=C1	quantified	C10H12N2O2	192.09	6	Metabolite
HMDB0001412	4-{[(2-amino-4-oxo-3,4,7,8-tetrahydropteridin-6-yl)methyl]amino}benzoic acid	7,8-Dihydropteroic acid	NC1=NC2=C(N=C(CNC3=CC=C(C=C3)C(O)=O)CN2)C(=O)N1	expected	C14H14N6O3	314.113	11	Metabolite
HMDB0001413	{2-[({[(2R,3S,4R,5R)-5-(4-amino-2-oxo-1,2-dihydropyrimidin-1-yl)-3,4-dihydroxyoxolan-2-yl]methoxy}(hydroxy)phosphoryl phosphonato)oxy]ethyl}trimethylazanium	Citicoline	C[N+](C)(C)CCOP([O-])(=O)OP(O)(=O)OC[C@H]1O[C@H]([C@H](O)[C@@H]1O)N1C=CC(N)=NC1=O	expected	C14H26N4O11P2	488.107	5	Metabolite
HMDB0001414	butane-1,4-diamine	Putrescine	NCCCCN	quantified	C4H12N2	88.1	0	Metabolite
HMDB0001416	[3-hydroxy-2,2-dimethyl-3-({2-[(2-sulfanylethyl)carbamoyl]ethyl}carbamoyl)propoxy]phosphonic acid	Pantetheine 4'-phosphate	CC(C)(COP(O)(O)=O)C(O)C(=O)NCCC(=O)NCCS	expected	C11H23N2O7P1S1	358.096	2	Metabolite
HMDB0001417	manganesoylol	Permanganate	O[Mn](=O)(=O)=O	expected	H1Mn1O4	119.926	0.5	Adduct
HMDB0001419	(1S,2R,5S,10S,11S,14R,15R)-14-[(2R,5S)-5-hydroxy-6-methylheptan-2-yl]-2,15-dimethyltetracyclo[8.7.0.0?7.0????????,?]heptadec-7-en-5-ol	24-Hydroxycholesterol	[H][C@@]1(CC[C@@]2([H])[C@]3([H])CC=C4C[C@@H](O)CC[C@]4(C)[C@@]3([H])CC[C@]12C)[C@H](C)CC[C@H](O)C(C)C	quantified	C27H46O2	402.35	5	Metabolite
HMDB0001420	(6R)-6-[(1R,3aS,5Z,7aS)-5-{2-[(1Z,5S)-5-hydroxy-2-methylidenecyclohexylidene]ethylidene}-7a-methyl-octahydro-1H-inden-1-yl]-2-methylheptane-1,2-diol	25,26-dihydroxyvitamin D	[H][C@@]12CC[C@]([H])([C@H](C)CCCC(C)(O)CO)[C@@]1(C)CC\C(C2)=C\C=C1\C[C@@H](O)CCC1=C	quantified	C27H44O3	416.329	6	Metabolite
HMDB0001421	(2S,5S,11S,14R,15R)-5-hydroxy-2,6,6,15-tetramethyl-14-[(2R)-6-methylhept-5-en-2-yl]tetracyclo[8.7.0.0?7.0????????,?]heptadec-1(10)-ene-11-carbaldehyde	4,4-Dimethyl-14a-formyl-5a-cholesta-8,24-dien-3b-ol	[H][C@@]1(CC[C@@]2(C=O)C3=C(CC[C@]12C)[C@@]1(C)CC[C@H](O)C(C)(C)C1CC3)[C@H](C)CCC=C(C)C	expected	C30H48O2	440.365	7	Metabolite
HMDB0001422	[(5S)-5-amino-5-carboxy-4-hydroxypentyl]trimethylazanium	3-Hydroxy-N6,N6,N6-trimethyl-L-lysine	C[N+](C)(C)CCCC(O)[C@H](N)C(O)=O	expected	C9H20N2O3	204.147	1	Metabolite
HMDB0001423	{[(2R,3S,4R,5R)-5-(6-amino-9H-purin-9-yl)-4-hydroxy-2-({[hydroxy({hydroxy[(3R)-3-hydroxy-2,2-dimethyl-3-({2-[(2-sulfanylethyl)carbamoyl]ethyl}carbamoyl)propoxy]phosphoryl}oxy)phosphoryl]oxy}methyl)oxolan-3-yl]oxy}phosphonic acid	Coenzyme A	CC(C)(COP(O)(=O)OP(O)(=O)OC[C@H]1O[C@H]([C@H](O)[C@@H]1OP(O)(O)=O)N1C=NC2=C1N=CN=C2N)[C@@H](O)C(=O)NCCC(=O)NCCS	expected	C21H36N7O16P3S1	767.115	9	Metabolite
HMDB0001424	(3E)-4-(pyridin-3-yl)but-3-enoic acid	4-(3-Pyridyl)-3-butenoic acid	OC(=O)C\C=C\C1=CN=CC=C1	expected	C9H9N1O2	163.063	6	Metabolite
HMDB0001425	[(1S,10R,11S,15S)-15-methyl-14-oxotetracyclo[8.7.0.0?7.0????????,?]heptadeca-2(7),3,5-trien-5-yl]oxidanesulfonic acid	Estrone sulfate	C[C@]12CC[C@H]3[C@@H](CCC4=C3C=CC(OS(O)(=O)=O)=C4)[C@@H]1CCC2=O	quantified	C18H22O5S1	350.119	8	Metabolite
HMDB0001426	formaldehyde	Formaldehyde	C=O	quantified	C1H2O1	30.0106	1	Adduct
HMDB0001427	(5R)-5-hydroxy-1-methyl-5-(pyridin-3-yl)pyrrolidin-2-one	5'-Hydroxycotinine	CN1C(=O)CC[C@@]1(O)C1=CN=CC=C1	expected	C10H12N2O2	192.09	6	Metabolite
HMDB0001429	phosphoric acid	Phosphate	OP(O)(O)=O	quantified	H3O4P1	97.9769	0	Adduct
HMDB0001430	(2S)-5,6-dioxo-2,3,5,6-tetrahydro-1H-indole-2-carboxylic acid	L-Dopachrome	OC(=O)[C@@H]1CC2=CC(=O)C(=O)C=C2N1	expected	C9H7N1O4	193.038	7	Metabolite
HMDB0001431	4-(aminomethyl)-5-(hydroxymethyl)-2-methylpyridin-3-ol	Pyridoxamine	CC1=C(O)C(CN)=C(CO)C=N1	quantified	C8H12N2O2	168.09	4	Metabolite
HMDB0001432	1-(4-aminobutyl)guanidine	Agmatine	NCCCCNC(N)=N	quantified	C5H14N4	130.122	1	Metabolite
HMDB0001433	{[(2R,3S,4R,5R)-5-(6-amino-9H-purin-9-yl)-3,4-dihydroxyoxolan-2-yl]methoxy}({[({[({[({[({[(2R,3S,4R,5R)-5-(6-amino-9H-purin-9-yl)-3,4-dihydroxyoxolan-2-yl]methoxy}(hydroxy)phosphoryl)oxy](hydroxy)phosphoryl}oxy)(hydroxy)phosphoryl]oxy}(hydroxy)phosphoryl)oxy](hydroxy)phosphoryl}oxy)(hydroxy)phosphoryl]oxy})phosphinic acid	Diadenosine heptaphosphate	NC1=NC=NC2=C1N=CN2[C@@H]1O[C@H](COP(O)(=O)OP(O)(=O)OP(O)(=O)OP(O)(=O)OP(O)(=O)OP(O)(=O)OP(O)(=O)OC[C@H]2O[C@H]([C@H](O)[C@@H]2O)N2C=NC3=C2N=CN=C3N)[C@@H](O)[C@H]1O	expected	C20H31N10O28P7	1075.95	14	Metabolite
HMDB0001434	2-amino-3-(4-hydroxy-3-methoxyphenyl)propanoic acid	3-Methoxytyrosine	COC1=C(O)C=CC(CC(N)C(O)=O)=C1	quantified	C10H13N1O4	211.084	5	Metabolite
HMDB0001438	(1S,3Z)-3-{2-[(3aS,4E,7aR)-1-[(2R,3E,5S)-6-hydroxy-5,6-dimethylhept-3-en-2-yl]-7a-methyl-octahydro-1H-inden-4-ylidene]ethylidene}-4-methylidenecyclohexan-1-ol	25-Hydroxyvitamin D2	C[C@H](\C=C\[C@H](C)C(O)(C)C)C1CC[C@@]2([H])\C(CCC[C@]12C)=C\C=C1\C[C@@H](O)CCC1=C	quantified	C28H44O2	412.334	7	Metabolite
HMDB0001439	{[(2R,3S,4R,5R)-5-(4-carbamoyl-5-formamido-1H-imidazol-1-yl)-3,4-dihydroxyoxolan-2-yl]methoxy}phosphonic acid	Phosphoribosyl formamidocarboxamide	NC(=O)C1=C(NC=O)N(C=N1)[C@@H]1O[C@H](COP(O)(O)=O)[C@@H](O)[C@H]1O	expected	C10H15N4O9P1	366.058	6	Metabolite
HMDB0001440	({[({[(2R,3S,5R)-5-(2-amino-6-oxo-6,9-dihydro-1H-purin-9-yl)-3-hydroxyoxolan-2-yl]methoxy}(hydroxy)phosphoryl)oxy](hydroxy)phosphoryl}oxy)phosphonic acid	dGTP	NC1=NC2=C(N=CN2[C@H]2C[C@H](O)[C@@H](COP(O)(=O)OP(O)(=O)OP(O)(O)=O)O2)C(=O)N1	expected	C10H16N5O13P3	506.996	7	Metabolite
HMDB0001441	6,7-dihydropteridine	Dihydropteridine	C1CN=C2N=CN=CC2=N1	expected	C6H6N4	134.059	6	Metabolite
HMDB0001442	7-[(1R,2R,3R)-3-hydroxy-2-[(1E,3S)-3-hydroxyoct-1-en-1-yl]-5-oxocyclopentyl]heptanoic acid	Prostaglandin E1	CCCCC[C@H](O)\C=C\[C@H]1[C@H](O)CC(=O)[C@@H]1CCCCCCC(O)=O	quantified	C20H34O5	354.241	4	Metabolite
HMDB0001443	phosphorous acid	Phosphite	OP(O)O	expected	H3O3P1	81.982	0	Adduct
HMDB0001444	{[(3S,4R,5R)-5-(6-amino-9H-purin-9-yl)-3,4-dihydroxyoxolan-2-yl]methoxy}[({[({[({[({[({[(2R,3S,4R,5R)-5-(6-amino-9H-purin-9-yl)-3,4-dihydroxyoxolan-2-yl]methoxy}(hydroxy)phosphoryl)oxy](hydroxy)phosphoryl}oxy)(hydroxy)phosphoryl]oxy}(hydroxy)phosphoryl)oxy](hydroxy)phosphoryl}oxy)(hydroxy)phosphoryl]oxy}(hydroxy)phosphoryl)oxy]phosphinic acid	Adenosine octaphosphate	NC1=NC=NC2=C1N=CN2[C@@H]1OC(COP(O)(=O)OP(O)(=O)OP(O)(=O)OP(O)(=O)OP(O)(=O)OP(O)(=O)OP(O)(=O)OP(O)(=O)OC[C@H]2O[C@H]([C@H](O)[C@@H]2O)N2C=NC3=C2N=CN=C3N)[C@@H](O)[C@H]1O	expected	C20H32N10O31P8	1155.91	14	Metabolite
HMDB0001445	{[(2S,3R,4R,5S,6R)-3-acetamido-4,5-dihydroxy-6-(hydroxymethyl)oxan-2-yl]oxy}({[hydroxy({[(6E)-3,7,11-trimethyldodeca-6,10-dien-1-yl]oxy})phosphoryl]oxy})phosphinic acid	N-Acetyl-D-glucosaminyldiphosphodolichol	OC[C@H]1O[C@@H](OP(O)(=O)OP(O)(=O)OCCC(C)CC\C=C(/C)CCC=C(C)C)[C@H](NC(=O)C)[C@@H](O)[C@@H]1O	expected	C23H43N1O12P2	587.226	4	Metabolite
HMDB0001448	sulfuric acid	Sulfate	OS(O)(=O)=O	quantified	H2O4S1	97.9674	0	Adduct
HMDB0001449	1-[(1S,2S,5R,7S,10R,11S,14S,15S)-5-hydroxy-2,15-dimethyltetracyclo[8.7.0.0?7.0????????,?]heptadecan-14-yl]ethan-1-one	Allopregnanolone	[H][C@@]12CC[C@H](C(C)=O)[C@@]1(C)CC[C@@]1([H])[C@@]2([H])CC[C@@]2([H])C[C@H](O)CC[C@]12C	quantified	C21H34O2	318.256	5	Metabolite
HMDB0001451	5-[(3R)-1,2-dithiolan-3-yl]pentanoic acid	(R)-lipoic acid	OC(=O)CCCC[C@@H]1CCSS1	quantified	C8H14O2S2	206.044	2	Metabolite
HMDB0001452	(5Z)-7-[(1S,3R,4S,5S)-3-[(1E,3S)-3-hydroxyoct-1-en-1-yl]-2,6-dioxabicyclo[3.1.1]heptan-4-yl]hept-5-enoic acid	Thromboxane A2	CCCCC[C@H](O)\C=C\[C@H]1O[C@H]2C[C@H](O2)[C@@H]1C\C=C/CCCC(O)=O	quantified	C20H32O5	352.225	5	Metabolite
HMDB0001453	cyanosulfanide	Thiocyanate	[S-]C#N	quantified	C1H1N1S1	58.983	2	Adduct
HMDB0001454	{[(2R,3S,4R,5R)-5-(2-amino-6-oxo-6,9-dihydro-3H-purin-9-yl)-3,4-dihydroxyoxolan-2-yl]methoxy}({[({[({[(2R,3S,4R,5R)-5-(6-amino-9H-purin-9-yl)-3,4-dihydroxyoxolan-2-yl]methoxy}(hydroxy)phosphoryl)oxy](hydroxy)phosphoryl}oxy)(hydroxy)phosphoryl]oxy})phosphinic acid	Guanosine tetraphosphate adenosine	NC1=NC(=O)C2=C(N1)N(C=N2)[C@@H]1O[C@H](COP(O)(=O)OP(O)(=O)OP(O)(=O)OP(O)(=O)OC[C@H]2O[C@H]([C@H](O)[C@@H]2O)N2C=NC3=C(N)N=CN=C23)[C@@H](O)[C@H]1O	expected	C20H28N10O20P4	852.043	14	Metabolite
HMDB0001455	1-[(1S,2S,5S,7S,10R,11S,14S,15S)-5-hydroxy-2,15-dimethyltetracyclo[8.7.0.0?7.0????????,?]heptadecan-14-yl]ethan-1-one	Alloepipregnanolone	[H][C@@]12CC[C@H](C(C)=O)[C@@]1(C)CC[C@@]1([H])[C@@]2([H])CC[C@@]2([H])C[C@@H](O)CC[C@]12C	quantified	C21H34O2	318.256	5	Metabolite
HMDB0001457	(1S,2S,5R,7S,9R,10R,11S,14R,15R,16S)-2,15-dimethyl-14-[(2R)-6-methylheptan-2-yl]tetracyclo[8.7.0.0?7.0????????,?]heptadecane-5,9,16-triol	5-b-Cholestane-3a ,7a ,12a-triol	[H][C@@]1(CC[C@@]2([H])[C@]3([H])[C@H](O)C[C@]4([H])C[C@H](O)CC[C@]4(C)[C@@]3([H])C[C@H](O)[C@]12C)[C@H](C)CCCC(C)C	expected	C27H48O3	420.36	4	Metabolite
HMDB0001458	5-[(3aR,4R,6aS)-2-oxo-hexahydro-1H-thieno[3,4-d]imidazolidin-4-yl]pentanamide	Biotin amide	[H][C@@]12CS[C@H](CCCCC(N)=O)[C@]1([H])NC(=O)N2	expected	C10H17N3O2S1	243.104	4	Metabolite
HMDB0001459	{[(2R,5R)-5-(2-amino-6-oxo-6,9-dihydro-1H-purin-9-yl)-3,4-dihydroxyoxolan-2-yl]methoxy}({[({[(2R,5R)-5-(6-amino-9H-purin-9-yl)-3,4-dihydroxyoxolan-2-yl]methoxy}(hydroxy)phosphoryl)oxy](hydroxy)phosphoryl}oxy)phosphinic acid	Guanosine triphosphate adenosine	NC1=NC2=C(N=CN2[C@@H]2O[C@H](COP(O)(=O)OP(O)(=O)OP(O)(=O)OC[C@H]3O[C@H](C(O)C3O)N3C=NC4=C3N=CN=C4N)C(O)C2O)C(=O)N1	expected	C20H27N10O17P3	772.077	14	Metabolite
HMDB0001460	diethoxy(sulfanylidene)phosphinous acid	Diethylthiophosphate	CCOP(O)(=S)OCC	quantified	C4H11O3P1S1	170.017	0	Metabolite
HMDB0001466	N-methyl-N-phenylmethanamine oxide	Dimethylaniline-N-oxide	C[N+](C)([O-])C1=CC=CC=C1	expected	C8H11N1O1	137.084	4	Metabolite
HMDB0001469	{[hydroxy({[(2E,6E,10E,14E,18E,22E,26E,30E,34E,38E)-3,7,11,15,19,23,27,31,35,39,43-undecamethyltetratetraconta-2,6,10,14,18,22,26,30,34,38,42-undecaen-1-yl]oxy})phosphoryl]oxy}phosphonic acid	Undecaprenyl diphosphate	CC(C)=CCC\C(C)=C\CC\C(C)=C\CC\C(C)=C\CC\C(C)=C\CC\C(C)=C\CC\C(C)=C\CC\C(C)=C\CC\C(C)=C\CC\C(C)=C\CC\C(C)=C\COP(O)(=O)OP(O)(O)=O	expected	C55H92O7P2	926.632	11	Metabolite
HMDB0001470	(2E)-2-methylbut-2-enoic acid	Tiglic acid	C\C=C(/C)C(O)=O	expected	C5H8O2	100.052	2	Metabolite
HMDB0001471	1-[(1S,2S,5S,7R,10R,11S,14S,15S)-5-hydroxy-2,15-dimethyltetracyclo[8.7.0.0?7.0????????,?]heptadecan-14-yl]ethan-1-one	Epipregnanolone	[H][C@@]12CC[C@H](C(C)=O)[C@@]1(C)CC[C@@]1([H])[C@@]2([H])CC[C@]2([H])C[C@@H](O)CC[C@]12C	quantified	C21H34O2	318.256	5	Metabolite
HMDB0001472	{[(2R,3S,4R,5R)-5-(2-amino-6-oxo-6,9-dihydro-3H-purin-9-yl)-3,4-dihydroxyoxolan-2-yl]methoxy}[({[({[({[(2R,3S,4R,5R)-5-(6-amino-9H-purin-9-yl)-3,4-dihydroxyoxolan-2-yl]methoxy}(hydroxy)phosphoryl)oxy](hydroxy)phosphoryl}oxy)(hydroxy)phosphoryl]oxy}(hydroxy)phosphoryl)oxy]phosphinic acid	Guanosine pentaphosphate adenosine	NC1=NC(=O)C2=C(N1)N(C=N2)[C@@H]1O[C@H](CO[P@](O)(=O)O[P@](O)(=O)O[P@](O)(=O)O[P@@](O)(=O)O[P@](O)(=O)OC[C@H]2O[C@H]([C@H](O)[C@@H]2O)N2C=NC3=C(N)N=CN=C23)[C@@H](O)[C@H]1O	expected	C20H29N10O23P5	932.01	14	Metabolite
HMDB0001473	(3-hydroxy-2-oxopropoxy)phosphonic acid	Dihydroxyacetone phosphate	OCC(=O)COP(O)(O)=O	quantified	C3H7O6P1	169.998	1	Metabolite
HMDB0001474	[4-(1,2-dihydroxyethyl)-2-hydroxyphenyl]oxidanesulfonic acid	3,4-Dihydroxyphenylglycol O-sulfate	OCC(O)C1=CC(O)=C(OS(O)(=O)=O)C=C1	expected	C8H10O7S1	250.015	4	Metabolite
HMDB0001476	2-amino-3-hydroxybenzoic acid	3-Hydroxyanthranilic acid	NC1=C(O)C=CC=C1C(O)=O	quantified	C7H7N1O3	153.043	5	Metabolite
HMDB0001478	gallane	Gallium	[GaH3]	quantified	Ga1H3	71.949	-0.5	Adduct
HMDB0001480	(2S)-2-amino-1-hydroxyoctadecan-3-one	3-Dehydrosphinganine	CCCCCCCCCCCCCCCC(=O)[C@@H](N)CO	detected	C18H37N1O2	299.282	1	Metabolite
HMDB0001481	N-[(2R,3R,4R,5S,6R)-2,4,5-trihydroxy-6-(hydroxymethyl)oxan-3-yl]sulfamic acid	N-Sulfo-D-glucosamine	OC[C@H]1O[C@@H](O)[C@H](NS(O)(=O)=O)[C@@H](O)[C@@H]1O	expected	C6H13N1O8S1	259.036	1	Metabolite
HMDB0001483	(5Z)-7-[(1R,2R,3R,5R)-3,5-dihydroxy-2-[(1E,3S)-3-hydroxyoct-1-en-1-yl]cyclopentyl]hept-5-enoic acid	Prostaglandin F2b	CCCCC[C@H](O)\C=C\[C@H]1[C@H](O)C[C@@H](O)[C@@H]1C\C=C/CCCC(O)=O	expected	C20H34O5	354.241	4	Metabolite
HMDB0001484	{[(2R,3S,4R,5R)-5-(6-amino-9H-purin-9-yl)-4-hydroxy-2-({[hydroxy({[hydroxy(3-hydroxy-2,2-dimethyl-3-{[2-({2-[(3-oxobutanoyl)sulfanyl]ethyl}carbamoyl)ethyl]carbamoyl}propoxy)phosphoryl]oxy})phosphoryl]oxy}methyl)oxolan-3-yl]oxy}phosphonic acid	Acetoacetyl-CoA	CC(=O)CC(=O)SCCNC(=O)CCNC(=O)C(O)C(C)(C)COP(O)(=O)OP(O)(=O)OC[C@H]1O[C@H]([C@H](O)[C@@H]1OP(O)(O)=O)N1C=NC2=C1N=CN=C2N	expected	C25H40N7O18P3S1	851.136	11	Metabolite
HMDB0001485	octane	Octane	CCCCCCCC	detected	C8H18	114.141	0	Metabolite
HMDB0001487	[({[(2R,3S,4R,5R)-5-(6-amino-9H-purin-9-yl)-3,4-dihydroxyoxolan-2-yl]methoxy}(hydroxy)phosphoryl)oxy]({[(2R,3S,4R,5R)-5-(3-carbamoyl-1,4-dihydropyridin-1-yl)-3,4-dihydroxyoxolan-2-yl]methoxy})phosphinic acid	NADH	NC(=O)C1=CN(C=CC1)[C@@H]1O[C@H](CO[P@](O)(=O)O[P@](O)(=O)OC[C@H]2O[C@H]([C@H](O)[C@@H]2O)N2C=NC3=C(N)N=CN=C23)[C@@H](O)[C@H]1O	quantified	C21H29N7O14P2	665.125	12	Metabolite
HMDB0001488	pyridine-3-carboxylic acid	Nicotinic acid	OC(=O)C1=CN=CC=C1	quantified	C6H5N1O2	123.032	5	Metabolite
HMDB0001489	{[(2R,3R,4S,5R)-3,4-dihydroxy-5-(hydroxymethyl)oxolan-2-yl]oxy}phosphonic acid	Ribose 1-phosphate	OC[C@H]1O[C@H](OP(O)(O)=O)[C@H](O)[C@@H]1O	quantified	C5H11O8P1	230.019	1	Metabolite
HMDB0001490	1-(4-hydroxy-3-methoxyphenyl)ethane-1,2-diol	Vanylglycol	COC1=CC(=CC=C1O)C(O)CO	quantified	C9H12O4	184.074	4	Metabolite
HMDB0001491	[(4-formyl-5-hydroxy-6-methylpyridin-3-yl)methoxy]phosphonic acid	Pyridoxal 5'-phosphate	CC1=NC=C(COP(O)(O)=O)C(C=O)=C1O	quantified	C8H10N1O6P1	247.025	5	Metabolite
HMDB0001492	2,7,8-trimethyl-2-(4,8,12-trimethyltridecyl)-3,4-dihydro-2H-1-benzopyran-6-ol	Gamma-Tocopherol	CC(C)CCCC(C)CCCC(C)CCCC1(C)CCC2=CC(O)=C(C)C(C)=C2O1	quantified	C28H48O2	416.365	5	Metabolite
HMDB0001493	{[(2R,3S,4R,5R)-5-(6-amino-9H-purin-9-yl)-4-hydroxy-2-({[hydroxy({[hydroxy(3-hydroxy-2,2-dimethyl-3-{[2-({2-[(3-methylbut-2-enoyl)sulfanyl]ethyl}carbamoyl)ethyl]carbamoyl}propoxy)phosphoryl]oxy})phosphoryl]oxy}methyl)oxolan-3-yl]oxy}phosphonic acid	3-Methylcrotonyl-CoA	CC(C)=CC(=O)SCCNC(=O)CCNC(=O)C(O)C(C)(C)COP(O)(=O)OP(O)(=O)OC[C@H]1O[C@H]([C@H](O)[C@@H]1OP(O)(O)=O)N1C=NC2=C1N=CN=C2N	expected	C26H42N7O17P3S1	849.157	11	Metabolite
HMDB0001494	(acetyloxy)phosphonic acid	Acetylphosphate	CC(=O)OP(O)(O)=O	expected	C2H5O5P1	139.987	1	Metabolite
HMDB0001495	5-({[(1R,4R,5S)-4,5-dihydroxycyclopent-2-en-1-yl]amino}methyl)-2-imino-1H,2H,3H,4H,7H-pyrrolo[2,3-d]pyrimidin-4-one	Queuine	O[C@@H]1C=C[C@@H](NCC2=CNC3=C2C(=O)NC(=N)N3)[C@@H]1O	quantified	C12H15N5O3	277.117	8	Metabolite
HMDB0001496	(1S,2R,5S,9S,11R,14R,15R)-2,15-dimethyl-14-[(2R)-6-methylheptan-2-yl]tetracyclo[8.7.0.0?7.0????????,?]heptadec-7-ene-5,9-diol	7a-Hydroxycholesterol	CC(C)CCC[C@@H](C)[C@H]1CC[C@@H]2C3[C@H](O)C=C4C[C@@H](O)CC[C@]4(C)[C@H]3CC[C@]12C	quantified	C27H46O2	402.35	5	Metabolite
HMDB0001497	1-methyl-2-(pyridin-3-yl)pyrrolidin-1-ium-1-olate	Nicotine-1'-N-oxide	C[N+]1([O-])CCCC1C1=CN=CC=C1	expected	C10H14N2O1	178.111	5	Metabolite
HMDB0001498	{[(1R,2S,3R,4R,5S,6R)-2,3,5-trihydroxy-4,6-bis(phosphonooxy)cyclohexyl]oxy}phosphonic acid	Inositol 1,4,5-trisphosphate	O[C@@H]1[C@H](O)[C@@H](OP(O)(O)=O)[C@H](OP(O)(O)=O)[C@@H](O)[C@@H]1OP(O)(O)=O	expected	C6H15O15P3	419.962	1	Metabolite
HMDB0001499	[({[(2R,3S,4R,5R)-5-(2-amino-6-oxo-6,9-dihydro-3H-purin-9-yl)-3,4-dihydroxyoxolan-2-yl]methoxy}(hydroxy)phosphoryl)oxy]({[(2R,3S,4S,5S,6R)-3,4,5-trihydroxy-6-methyloxan-2-yl]oxy})phosphinic acid	GDP-D-Rhamnose	C[C@H]1O[C@H](OP(O)(=O)OP(O)(=O)OC[C@H]2O[C@H]([C@H](O)[C@@H]2O)N2C=NC3=C2NC(N)=NC3=O)[C@@H](O)[C@@H](O)[C@@H]1O	expected	C16H25N5O15P2	589.082	8	Metabolite
HMDB0001501	{[(2R,3R,4R,5R)-4-[({[(2R,3S,4R,5R)-5-(2-amino-6-oxo-6,9-dihydro-3H-purin-9-yl)-3,4-dihydroxyoxolan-2-yl]methoxy}(hydroxy)phosphoryl)oxy]-2-(6-amino-9H-purin-9-yl)-5-(hydroxymethyl)oxolan-3-yl]oxy}phosphonic acid	Guanosine diphosphate adenosine	NC1=NC(=O)C2=C(N1)N(C=N2)[C@@H]1O[C@H](COP(O)(=O)O[C@@H]2[C@@H](CO)O[C@H]([C@@H]2OP(O)(O)=O)N2C=NC3=C(N)N=CN=C23)[C@@H](O)[C@H]1O	expected	C20H26N10O14P2	692.111	14	Metabolite
HMDB0001504	O-4-aminophenyl O,O-diethyl phosphorothioate	Aminoparathion	CCOP(=S)(OCC)OC1=CC=C(N)C=C1	expected	C10H16N1O3P1S1	261.059	4	Metabolite
HMDB0001505	benzene	Benzene	C1=CC=CC=C1	quantified	C6H6	78.047	4	Metabolite
HMDB0001507	{[(2R,3S,4R,5R)-5-(2-amino-6-oxo-6,9-dihydro-3H-purin-9-yl)-3,4-dihydroxyoxolan-2-yl]methoxy}[({[(2R,3S,4R,5R)-5-(2-amino-6-oxo-6,9-dihydro-3H-purin-9-yl)-3,4-dihydroxyoxolan-2-yl]methoxy}(hydroxy)phosphoryl)oxy]phosphinic acid	Diguanosine diphosphate	NC1=NC(=O)C2=C(N1)N(C=N2)[C@@H]1O[C@H](COP(O)(=O)OP(O)(=O)OC[C@H]2O[C@H]([C@H](O)[C@@H]2O)N2C=NC3=C2NC(N)=NC3=O)[C@@H](O)[C@H]1O	expected	C20H26N10O15P2	708.105	14	Metabolite
HMDB0001508	[({[(2R,3S)-5-(6-amino-9H-purin-9-yl)-3-hydroxyoxolan-2-yl]methoxy}(hydroxy)phosphoryl)oxy]phosphonic acid	dADP	NC1=NC=NC2=C1N=CN2C1C[C@H](O)[C@@H](COP(O)(=O)OP(O)(O)=O)O1	expected	C10H15N5O9P2	411.035	7	Metabolite
HMDB0001509	(5S,6Z,8E,10E,12R,14Z)-5,12,20-trihydroxyicosa-6,8,10,14-tetraenoic acid	20-Hydroxy-leukotriene B4	OCCCCC\C=C/C[C@@H](O)\C=C\C=C\C=C/[C@@H](O)CCCC(O)=O	quantified	C20H32O5	352.225	5	Metabolite
HMDB0001510	2-(tert-butylamino)-1-(3-chlorophenyl)propan-1-one	Bupropion	CC(NC(C)(C)C)C(=O)C1=CC(Cl)=CC=C1	expected	C13Cl1H18N1O1	239.108	5	Metabolite
HMDB0001511	2-(3-methyl-1-phosphonocarbamimidamido)acetic acid	Phosphocreatine	CN(CC(O)=O)C(=N)NP(O)(O)=O	quantified	C4H10N3O5P1	211.036	2	Metabolite
HMDB0001512	3-[(4-amino-2-methylpyrimidin-5-yl)methyl]-5-(2-{[hydroxy({[hydroxy(phosphonooxy)phosphoryl]oxy})phosphoryl]oxy}ethyl)-4-methyl-1,3-thiazol-3-ium	Thiamine triphosphate	CC1=C(CCOP(O)(=O)OP(O)(=O)OP(O)(O)=O)SC=[N+]1CC1=C(N)N=C(C)N=C1	expected	C12H19N4O10P3S1	504.003	7	Metabolite
HMDB0001513	[({[(7E)-3,8-dimethyldec-7-en-1-yl]oxy}(hydroxy)phosphoryl)oxy]phosphonic acid	Dolichyl diphosphate	CC\C(C)=C\CCCC(C)CCOP(O)(=O)OP(O)(O)=O	expected	C12H26O7P2	344.115	1	Metabolite
HMDB0001514	(3R,4R,5S,6R)-3-amino-6-(hydroxymethyl)oxane-2,4,5-triol	Glucosamine	N[C@H]1C(O)O[C@H](CO)[C@@H](O)[C@@H]1O	quantified	C6H13N1O5	179.079	1	Metabolite
HMDB0001517	{[(2R,3S,4R,5R)-5-(5-amino-4-carbamoyl-1H-imidazol-1-yl)-3,4-dihydroxyoxolan-2-yl]methoxy}phosphonic acid	AICAR	NC(=O)C1=C(N)N(C=N1)[C@@H]1O[C@H](COP(O)(O)=O)[C@@H](O)[C@H]1O	quantified	C9H15N4O8P1	338.063	5	Metabolite
HMDB0001518	3-(6-hydroxy-2,5,7,8-tetramethyl-3,4-dihydro-2H-1-benzopyran-2-yl)propanoic acid	alpha-CEHC	CC1=C(O)C(C)=C2CCC(C)(CCC(O)=O)OC2=C1C	quantified	C16H22O4	278.152	6	Metabolite
HMDB0001520	{[(2R,3S,4S)-5-{7,8-dimethyl-2,4-dioxo-2H,3H,4H,10H-benzo[g]pteridin-10-yl}-2,3,4-trihydroxypentyl]oxy}phosphonic acid	Flavin Mononucleotide	CC1=CC2=C(C=C1C)N(C[C@H](O)[C@H](O)[C@H](O)COP(O)(O)=O)C1=NC(=O)NC(=O)C1=N2	quantified	C17H21N4O9P1	456.105	10	Metabolite
HMDB0001521	{[(2R,3S,4R,5R)-5-(6-amino-9H-purin-9-yl)-4-hydroxy-2-({[hydroxy({[hydroxy({3-hydroxy-2,2-dimethyl-3-[(2-{[2-(tetradecanoylsulfanyl)ethyl]carbamoyl}ethyl)carbamoyl]propoxy})phosphoryl]oxy})phosphoryl]oxy}methyl)oxolan-3-yl]oxy}phosphonic acid	Tetradecanoyl-CoA	CCCCCCCCCCCCCC(=O)SCCNC(=O)CCNC(=O)C(O)C(C)(C)COP(O)(=O)OP(O)(=O)OC[C@H]1O[C@H]([C@H](O)[C@@H]1OP(O)(O)=O)N1C=NC2=C1N=CN=C2N	expected	C35H62N7O17P3S1	977.314	10	Metabolite
HMDB0001522	1-methylguanidine	Methylguanidine	CNC(N)=N	quantified	C2H7N3	73.064	1	Metabolite
HMDB0001525	1H-imidazole	Imidazole	N1C=CN=C1	quantified	C3H4N2	68.0374	3	Metabolite
HMDB0001526	6-(acetylsulfanyl)-8-sulfanyloctanamide	S-Acetyldihydrolipoamide	CC(=O)SC(CCS)CCCCC(N)=O	expected	C10H19N1O2S2	249.086	2	Metabolite
HMDB0001527	3-(methylsulfanyl)propanoic acid	3-Methylthiopropionic acid	CSCCC(O)=O	quantified	C4H8O2S1	120.025	1	Metabolite
HMDB0001530	{[(2R,3R,4R,5R)-2,3,4,5,6-pentahydroxyhexyl]oxy}phosphonic acid	Mannitol 1-phosphate	OC[C@@H](O)[C@@H](O)[C@H](O)[C@H](O)COP(O)(O)=O	expected	C6H15O9P1	262.045	0	Metabolite
HMDB0001532	({[({[(2R,3S,5R)-5-(6-amino-9H-purin-9-yl)-3-hydroxyoxolan-2-yl]methoxy}(hydroxy)phosphoryl)oxy](hydroxy)phosphoryl}oxy)phosphonic acid	Deoxyadenosine triphosphate	NC1=NC=NC2=C1N=CN2[C@H]1C[C@H](O)[C@@H](COP(O)(=O)OP(O)(=O)OP(O)(O)=O)O1	quantified	C10H16N5O12P3	491.001	7	Metabolite
HMDB0001533	2-({4-[(6aR)-3-amino-1-oxo-1H,2H,5H,6H,6aH,7H,8H,9H-imidazolidino[1,5-f]pteridin-8-yl]phenyl}formamido)pentanedioic acid	5,10-Methylene-THF	[H][C@@]12CN(CN1C1=C(NC2)N=C(N)NC1=O)C1=CC=C(C=C1)C(=O)NC(CCC(O)=O)C(O)=O	quantified	C20H23N7O6	457.171	13	Metabolite
HMDB0001534	2-[(4-{[(2-amino-5-carboximidoyl-4-oxo-3,4,5,6,7,8-hexahydropteridin-6-yl)methyl]amino}phenyl)formamido]pentanedioic acid	5-Formiminotetrahydrofolic acid	NC1=NC2=C(N(C=N)C(CNC3=CC=C(C=C3)C(=O)NC(CCC(O)=O)C(O)=O)CN2)C(=O)N1	expected	C20H24N8O6	472.182	13	Metabolite
HMDB0001536	formamide	Formamide	NC=O	detected	C1H3N1O1	45.0215	1	Adduct
HMDB0001537	5-(2-aminoethyl)benzene-1,2,4-triol	6-Hydroxydopamine	NCCC1=C(O)C=C(O)C(O)=C1	quantified	C8H11N1O3	169.074	4	Metabolite
HMDB0001538	2-(pyridin-3-yl)acetic acid	3-Pyridylacetic acid	OC(=O)CC1=CN=CC=C1	quantified	C7H7N1O2	137.048	5	Metabolite
HMDB0001539	(2S)-2-amino-5-[(E)-[amino(dimethylamino)methylidene]amino]pentanoic acid	Asymmetric dimethylarginine	N[C@@H](CCC\N=C(/N)N(C)C)C(O)=O	quantified	C8H18N4O2	202.143	2	Metabolite
HMDB0001541	{[(2R,3S,4R,5R)-5-(2-amino-6-oxo-6,9-dihydro-3H-purin-9-yl)-3,4-dihydroxyoxolan-2-yl]methoxy}({[({[({[({[(2R,3S,4R,5R)-5-(6-amino-9H-purin-9-yl)-3,4-dihydroxyoxolan-2-yl]methoxy}(hydroxy)phosphoryl)oxy](hydroxy)phosphoryl}oxy)(hydroxy)phosphoryl]oxy}(hydroxy)phosphoryl)oxy](hydroxy)phosphoryl}oxy)phosphinic acid	Guanosine hexaphosphate adenosine	NC1=NC(=O)C2=C(N1)N(C=N2)[C@@H]1O[C@H](COP(O)(=O)OP(O)(=O)OP(O)(=O)OP(O)(=O)OP(O)(=O)OP(O)(=O)OC[C@H]2O[C@H]([C@H](O)[C@@H]2O)N2C=NC3=C(N)N=CN=C23)[C@@H](O)[C@H]1O	expected	C20H30N10O26P6	1011.98	14	Metabolite
HMDB0001542	N-[(2R,3R,4R,5S,6R)-2,4-dihydroxy-6-(hydroxymethyl)-5-{[(2S,3R,4S,5R,6R)-3,4,5-trihydroxy-6-(hydroxymethyl)oxan-2-yl]oxy}oxan-3-yl]acetamide	N-Acetyllactosamine	CC(=O)N[C@H]1[C@H](O)O[C@H](CO)[C@@H](O[C@@H]2O[C@H](CO)[C@H](O)[C@H](O)[C@H]2O)[C@@H]1O	expected	C14H25N1O11	383.143	3	Metabolite
HMDB0001543	{[(2R,3S,4R,5R)-5-(2-amino-6-oxo-6,9-dihydro-1H-purin-9-yl)-3,4-dihydroxyoxolan-2-yl]methoxy}({[({[({[({[({[(2R,3S,4R,5R)-5-(2-amino-6-oxo-6,9-dihydro-1H-purin-9-yl)-3,4-dihydroxyoxolan-2-yl]methoxy}(hydroxy)phosphoryl)oxy](hydroxy)phosphoryl}oxy)(hydroxy)phosphoryl]oxy}(hydroxy)phosphoryl)oxy](hydroxy)phosphoryl}oxy)(hydroxy)phosphoryl]oxy})phosphinic acid	Diguanosine hexaphosphate	NC1=NC2=C(N=CN2[C@@H]2O[C@H](COP(O)(=O)OP(O)(=O)OP(O)(=O)OP(O)(=O)OP(O)(=O)OP(O)(=O)OP(O)(=O)OC[C@H]3O[C@H]([C@H](O)[C@@H]3O)N3C=NC4=C3N=C(N)NC4=O)[C@@H](O)[C@H]2O)C(=O)N1	expected	C20H31N10O30P7	1107.94	14	Metabolite
HMDB0001544	3-chlorobenzoic acid	m-Chlorobenzoic acid	OC(=O)C1=CC(Cl)=CC=C1	quantified	C7Cl1H5O2	155.998	5	Metabolite
HMDB0001545	3-hydroxy-5-(hydroxymethyl)-2-methylpyridine-4-carbaldehyde	Pyridoxal	CC1=NC=C(CO)C(C=O)=C1O	quantified	C8H9N1O3	167.058	5	Metabolite
HMDB0001546	[({[(2R,3S,4R,5R)-5-(4-amino-2-oxo-1,2-dihydropyrimidin-1-yl)-3,4-dihydroxyoxolan-2-yl]methoxy}(hydroxy)phosphoryl)oxy]phosphonic acid	CDP	NC1=NC(=O)N(C=C1)[C@@H]1O[C@H](COP(O)(=O)OP(O)(O)=O)[C@@H](O)[C@H]1O	quantified	C9H15N3O11P2	403.018	5	Metabolite
HMDB0001547	(1S,2R,10S,11S,14S,15S,17S)-17-hydroxy-14-(2-hydroxyacetyl)-2,15-dimethyltetracyclo[8.7.0.0?7.0????????,?]heptadec-6-en-5-one	Corticosterone	[H][C@@]1(CC[C@@]2([H])[C@]3([H])CCC4=CC(=O)CC[C@]4(C)[C@@]3([H])[C@@]([H])(O)C[C@]12C)C(=O)CO	quantified	C21H30O4	346.214	7	Metabolite
HMDB0001548	{[(2R,3S,4R)-3,4,5-trihydroxyoxolan-2-yl]methoxy}phosphonic acid	D-Ribose 5-phosphate	OC1O[C@H](COP(O)(O)=O)[C@@H](O)[C@H]1O	quantified	C5H11O8P1	230.019	1	Metabolite
HMDB0001550	(2S)-2-amino-4-{[(1R)-1-[(carboxymethyl)carbamoyl]-2-(formylsulfanyl)ethyl]carbamoyl}butanoic acid	S-Formylglutathione	N[C@@H](CCC(=O)N[C@@H](CSC=O)C(=O)NCC(O)=O)C(O)=O	expected	C11H17N3O7S1	335.079	5	Metabolite
HMDB0001551	hexadecanal	Palmitaldehyde	CCCCCCCCCCCCCCCC=O	expected	C16H32O1	240.245	1	Metabolite
HMDB0001552	4-carbamoyl-2-oxobutanoic acid	2-Keto-glutaramic acid	NC(=O)CCC(=O)C(O)=O	expected	C5H7N1O4	145.038	3	Metabolite
HMDB0001553	4-(methylsulfanyl)-2-oxobutanoic acid	2-Oxo-4-methylthiobutanoic acid	CSCCC(=O)C(O)=O	quantified	C5H8O3S1	148.019	2	Metabolite
HMDB0001554	{[(2R,3S,4R,5R)-5-(2,6-dioxo-2,3,6,9-tetrahydro-1H-purin-9-yl)-3,4-dihydroxyoxolan-2-yl]methoxy}phosphonic acid	Xanthylic acid	O[C@@H]1[C@@H](COP(O)(O)=O)O[C@H]([C@@H]1O)N1C=NC2=C1NC(=O)NC2=O	expected	C10H13N4O9P1	364.042	7	Metabolite
HMDB0001555	{[4-(aminomethyl)-5-hydroxy-6-methylpyridin-3-yl]methoxy}phosphonic acid	Pyridoxamine 5'-phosphate	CC1=NC=C(COP(O)(O)=O)C(CN)=C1O	quantified	C8H13N2O5P1	248.056	4	Metabolite
HMDB0001557	10-[(2R,3R,4R)-2,3,4,5-tetrahydroxypentyl]-2H,3H,4H,10H-benzo[g]pteridine-2,4-dione	Riboflavin reduced	OC[C@@H](O)[C@H](O)[C@H](O)CN1C2=CC=CC=C2N=C2C(=O)NC(=O)N=C12	expected	C15H16N4O6	348.107	10	Metabolite
HMDB0001562	2-[(4-{[(2-amino-5-formyl-4-oxo-3,4,5,6,7,8-hexahydropteridin-6-yl)methyl]amino}phenyl)formamido]pentanedioic acid	Folinic acid	NC1=NC2=C(N(C=O)C(CNC3=CC=C(C=C3)C(=O)NC(CCC(O)=O)C(O)=O)CN2)C(=O)N1	quantified	C20H23N7O7	473.166	13	Metabolite
HMDB0001563	2-amino-9-[(2R,3R,4S,5R)-3,4-dihydroxy-5-(hydroxymethyl)oxolan-2-yl]-1-methyl-6,9-dihydro-1H-purin-6-one	1-Methylguanosine	CN1C(N)=NC2=C(N=CN2[C@@H]2O[C@H](CO)[C@@H](O)[C@H]2O)C1=O	quantified	C11H15N5O5	297.107	7	Metabolite
HMDB0001564	[({[(2R,3S,4R,5R)-5-(4-amino-2-oxo-1,2-dihydropyrimidin-1-yl)-3,4-dihydroxyoxolan-2-yl]methoxy}(hydroxy)phosphoryl)oxy](2-aminoethoxy)phosphinic acid	CDP-Ethanolamine	NCCOP(O)(=O)OP(O)(=O)OC[C@H]1O[C@H]([C@H](O)[C@@H]1O)N1C=CC(N)=NC1=O	expected	C11H20N4O11P2	446.06	5	Metabolite
HMDB0001565	[2-(trimethylazaniumyl)ethoxy]phosphonic acid	Phosphorylcholine	C[N+](C)(C)CCOP(O)(O)=O	quantified	C5H14N1O4P1	183.066	0	Metabolite
HMDB0001566	2-amino-3-methyl-6,7-dihydro-3H-purin-6-one	3-Methylguanine	CN1C2=C(NC=N2)C(=O)N=C1N	expected	C6H7N5O1	165.065	6	Metabolite
HMDB0001568	(2Z)-oct-2-enoic acid	trans-2-Octenoic acid	CCCCC\C=C\C(O)=O	expected	C8H14O2	142.099	2	Metabolite
HMDB0001569	(1S,2S,5R,7S,10R,11S,14R,15R)-2,15-dimethyl-14-[(2R)-6-methylheptan-2-yl]tetracyclo[8.7.0.0?7.0????????,?]heptadecan-5-ol	Epi-coprostanol	[H][C@@]1(CC[C@@]2([H])[C@]3([H])CC[C@@]4([H])C[C@H](O)CC[C@]4(C)[C@@]3([H])CC[C@]12C)[C@H](C)CCCC(C)C	detected	C27H48O1	388.371	4	Metabolite
HMDB0001570	1-[(6R)-2-hydroxy-2-oxo-hexahydro-2<U+03BB>5-furo[3,2-d][1,3,2]dioxaphosphinin-6-yl]-5-methyl-1,2,3,4-tetrahydropyrimidine-2,4-dione	Thymidine 3',5'-cyclic monophosphate	CC1=CN([C@H]2CC3OP(O)(=O)OCC3O2)C(=O)NC1=O	expected	C10H13N2O7P1	304.046	6	Metabolite
HMDB0001586	{[(3R,4S,5S,6R)-3,4,5-trihydroxy-6-(hydroxymethyl)oxan-2-yl]oxy}phosphonic acid	Glucose 1-phosphate	OC[C@H]1OC(OP(O)(O)=O)[C@H](O)[C@@H](O)[C@@H]1O	quantified	C6H13O9P1	260.03	1	Metabolite
HMDB0001587	2-oxo-2-phenylacetic acid	Phenylglyoxylic acid	OC(=O)C(=O)C1=CC=CC=C1	quantified	C8H6O3	150.032	6	Metabolite
HMDB0001624	2-hydroxyhexanoic acid	2-Hydroxycaproic acid	CCCCC(O)C(O)=O	quantified	C6H12O3	132.079	1	Metabolite
HMDB0001644	(3S,4R)-1,3,4,5-tetrahydroxypentan-2-one	D-Xylulose	OC[C@@H](O)[C@H](O)C(=O)CO	quantified	C5H10O5	150.053	1	Metabolite
HMDB0001645	(2S)-2-aminohexanoic acid	L-Norleucine	CCCC[C@H](N)C(O)=O	quantified	C6H13N1O2	131.095	1	Metabolite
HMDB0001659	propan-2-one	Acetone	CC(C)=O	quantified	C3H6O1	58.0419	1	Metabolite
HMDB0001713	(2E)-3-(3-hydroxyphenyl)prop-2-enoic acid	m-Coumaric acid	OC(=O)\C=C\C1=CC=CC(O)=C1	quantified	C9H8O3	164.047	6	Metabolite
HMDB0001721	2-amino-3-(phosphonooxy)propanoic acid	DL-O-Phosphoserine	NC(COP(O)(O)=O)C(O)=O	quantified	C3H8N1O6P1	185.009	1	Metabolite
HMDB0001786	(2R,3S,5R)-2-(hydroxymethyl)-5-{3H-imidazo[2,1-f]purin-3-yl}oxolan-3-ol	Ethenodeoxyadenosine	OC[C@H]1O[C@H](C[C@@H]1O)N1C=NC2=C1N=CN1C=CN=C21	expected	C12H13N5O3	275.102	9	Metabolite
HMDB0001830	(1S,2R,10S,11S,14S,15S)-14-acetyl-2,15-dimethyltetracyclo[8.7.0.0?7.0????????,?]heptadec-6-en-5-one	Progesterone	[H][C@@]12CC[C@H](C(C)=O)[C@@]1(C)CC[C@@]1([H])[C@@]2([H])CCC2=CC(=O)CC[C@]12C	quantified	C21H30O2	314.225	7	Metabolite
HMDB0001833	2-[(4-{[(2,4-diaminopteridin-6-yl)methyl]amino}phenyl)formamido]pentanedioic acid	Aminopterin	NC1=NC2=C(N=C(CNC3=CC=C(C=C3)C(=O)NC(CCC(O)=O)C(O)=O)C=N2)C(N)=N1	expected	C19H20N8O5	440.156	14	Metabolite
HMDB0001842	guanidine	Guanidine	NC(N)=N	quantified	C1H5N3	59.0483	1	Adduct
HMDB0001843	2-(prop-2-enamido)acetic acid	N-Acryloylglycine	OC(=O)CNC(=O)C=C	expected	C5H7N1O3	129.043	3	Metabolite
HMDB0001844	2-methylbutanedioic acid	Methylsuccinic acid	CC(CC(O)=O)C(O)=O	quantified	C5H8O4	132.042	2	Metabolite
HMDB0001846	2-{[4-({[(6S)-2-amino-4-oxo-1,4,5,6,7,8-hexahydropteridin-6-yl]methyl}amino)phenyl]formamido}pentanedioic acid	Tetrahydrofolic acid	NC1=NC(=O)C2=C(NC[C@H](CNC3=CC=C(C=C3)C(=O)NC(CCC(O)=O)C(O)=O)N2)N1	quantified	C19H23N7O6	445.171	12	Metabolite
HMDB0001847	1,3,7-trimethyl-2,3,6,7-tetrahydro-1H-purine-2,6-dione	Caffeine	CN1C=NC2=C1C(=O)N(C)C(=O)N2C	quantified	C8H10N4O2	194.08	6	Metabolite
HMDB0001848	(3-{2-azatricyclo[9.4.0.0?8]pentadeca-1(15),3,5,7,11,13-hexaen-2-yl}propyl)dimethylamine	Imipramine	CN(C)CCCN1C2=CC=CC=C2CCC2=CC=CC=C12	expected	C19H24N2	280.194	9	Metabolite
HMDB0001849	1-(naphthalen-1-yloxy)-3-[(propan-2-yl)amino]propan-2-ol	Propranolol	CC(C)NCC(O)COC1=CC=CC2=CC=CC=C12	quantified	C16H21N1O2	259.157	7	Metabolite
HMDB0001850	2-(3,4-dimethoxyphenyl)-5-{[2-(3,4-dimethoxyphenyl)ethyl](methyl)amino}-2-(propan-2-yl)pentanenitrile	Verapamil	COC1=C(OC)C=C(CCN(C)CCCC(C#N)(C(C)C)C2=CC(OC)=C(OC)C=C2)C=C1	expected	C27H38N2O4	454.283	10	Metabolite
HMDB0001851	(2S,4S)-pentane-1,2,3,4,5-pentol	L-Arabitol	OC[C@H](O)C(O)[C@@H](O)CO	quantified	C5H12O5	152.068	0	Metabolite
HMDB0001852	(2E,4E,6E,8E)-3,7-dimethyl-9-(2,6,6-trimethylcyclohex-1-en-1-yl)nona-2,4,6,8-tetraenoic acid	all-trans-Retinoic acid	C\C(\C=C\C1=C(C)CCCC1(C)C)=C/C=C/C(/C)=C/C(O)=O	quantified	C20H28O2	300.209	7	Metabolite
HMDB0001855	3-(2-hydroxyethyl)-1H-indol-5-ol	5-Hydroxytryptophol	OCCC1=CNC2=CC=C(O)C=C12	quantified	C10H11N1O2	177.079	6	Metabolite
HMDB0001856	3,4-dihydroxybenzoic acid	Protocatechuic acid	OC(=O)C1=CC(O)=C(O)C=C1	quantified	C7H6O4	154.027	5	Metabolite
HMDB0001857	1,3-dimethyl-2,3,6,7,8,9-hexahydro-1H-purine-2,6,8-trione	1,3-Dimethyluric acid	CN1C2=C(NC(=O)N2)C(=O)N(C)C1=O	quantified	C7H8N4O3	196.06	6	Metabolite
HMDB0001858	4-methylphenol	p-Cresol	CC1=CC=C(O)C=C1	quantified	C7H8O1	108.058	4	Metabolite
HMDB0001859	N-(4-hydroxyphenyl)acetamide	Acetaminophen	CC(=O)NC1=CC=C(O)C=C1	quantified	C8H9N1O2	151.063	5	Metabolite
HMDB0001860	1,7-dimethyl-2,3,6,7-tetrahydro-1H-purine-2,6-dione	Paraxanthine	CN1C=NC2=C1C(=O)N(C)C(=O)N2	quantified	C7H8N4O2	180.065	6	Metabolite
HMDB0001861	2-(1-methyl-1H-imidazol-5-yl)ethan-1-amine	3-Methylhistamine	CN1C=NC=C1CCN	quantified	C6H11N3	125.095	3	Metabolite
HMDB0001862	2-methylidenebutanoic acid	2-Ethylacrylic acid	CCC(=C)C(O)=O	expected	C5H8O2	100.052	2	Metabolite
HMDB0001863	2-hydroxypentanoic acid	2-Hydroxyvaleric acid	CCCC(O)C(O)=O	quantified	C5H10O3	118.063	1	Metabolite
HMDB0001864	2-oxohexanoic acid	2-Ketohexanoic acid	CCCCC(=O)C(O)=O	detected	C6H10O3	130.063	2	Metabolite
HMDB0001865	2-oxopentanoic acid	2-Oxovaleric acid	CCCC(=O)C(O)=O	quantified	C5H8O3	116.047	2	Metabolite
HMDB0001866	2-(3,4-dihydroxyphenyl)-2-hydroxyacetic acid	3,4-Dihydroxymandelic acid	OC(C(O)=O)C1=CC=C(O)C(O)=C1	quantified	C8H8O5	184.037	5	Metabolite
HMDB0001867	2-[(4-aminophenyl)formamido]acetic acid	4-Aminohippuric acid	NC1=CC=C(C=C1)C(=O)NCC(O)=O	quantified	C9H10N2O3	194.069	6	Metabolite
HMDB0001868	2-hydroxy-5-methoxybenzoic acid	5-Methoxysalicylic acid	COC1=CC(C(O)=O)=C(O)C=C1	quantified	C8H8O4	168.042	5	Metabolite
HMDB0001870	benzoic acid	Benzoic acid	OC(=O)C1=CC=CC=C1	quantified	C7H6O2	122.037	5	Metabolite
HMDB0001871	(2R,3R)-2-(3,4-dihydroxyphenyl)-3,4-dihydro-2H-1-benzopyran-3,5,7-triol	Epicatechin	O[C@@H]1CC2=C(O)C=C(O)C=C2O[C@@H]1C1=CC(O)=C(O)C=C1	quantified	C15H14O6	290.079	9	Metabolite
HMDB0001873	2-methylpropanoic acid	Isobutyric acid	CC(C)C(O)=O	quantified	C4H8O2	88.0524	1	Metabolite
HMDB0001874	(1R,2S)-1-hydroxypropane-1,2,3-tricarboxylic acid	D-threo-Isocitric acid	O[C@H]([C@H](CC(O)=O)C(O)=O)C(O)=O	expected	C6H8O7	192.027	3	Metabolite
HMDB0001875	methanol	Methanol	CO	quantified	C1H4O1	32.0262	0	Adduct
HMDB0001876	{2-hydroxy-4-[(1R)-1-hydroxy-2-(methylamino)ethyl]phenyl}oxidanesulfonic acid	Epinephrine sulfate	CNC[C@H](O)C1=CC(O)=C(OS(O)(=O)=O)C=C1	quantified	C9H13N1O6S1	263.046	4	Metabolite
HMDB0001877	2-propylpentanoic acid	Valproic acid	CCCC(CCC)C(O)=O	quantified	C8H16O2	144.115	1	Metabolite
HMDB0001878	5-methyl-2-(propan-2-yl)phenol	Thymol	CC(C)C1=C(O)C=C(C)C=C1	quantified	C10H14O1	150.104	4	Metabolite
HMDB0001879	2-(acetyloxy)benzoic acid	Aspirin	CC(=O)OC1=CC=CC=C1C(O)=O	quantified	C9H8O4	180.042	6	Metabolite
HMDB0001881	propane-1,2-diol	Propylene glycol	CC(O)CO	quantified	C3H8O2	76.0524	0	Metabolite
HMDB0001882	1,3-dihydroxypropan-2-one	Dihydroxyacetone	OCC(=O)CO	quantified	C3H6O3	90.0317	1	Metabolite
HMDB0001885	2-amino-3-(3-chloro-4-hydroxyphenyl)propanoic acid	3-Chlorotyrosine	NC(CC1=CC(Cl)=C(O)C=C1)C(O)=O	quantified	C9Cl1H10N1O3	215.035	5	Metabolite
HMDB0001886	3-methyl-2,3,6,7-tetrahydro-1H-purine-2,6-dione	3-Methylxanthine	CN1C2=C(NC=N2)C(=O)NC1=O	quantified	C6H6N4O2	166.049	6	Metabolite
HMDB0001888	N,N-dimethylformamide	N,N-Dimethylformamide	CN(C)C=O	quantified	C3H7N1O1	73.0528	1	Metabolite
HMDB0001889	1,3-dimethyl-2,3,6,7-tetrahydro-1H-purine-2,6-dione	Theophylline	CN1C2=C(NC=N2)C(=O)N(C)C1=O	quantified	C7H8N4O2	180.065	6	Metabolite
HMDB0001890	(2R)-2-acetamido-3-sulfanylpropanoic acid	Acetylcysteine	CC(=O)N[C@@H](CS)C(O)=O	quantified	C5H9N1O3S1	163.03	2	Metabolite
HMDB0001891	3-aminobenzoic acid	m-Aminobenzoic acid	NC1=CC=CC(=C1)C(O)=O	quantified	C7H7N1O2	137.048	5	Metabolite
HMDB0001892	2-methyl-1,4-dihydronaphthalene-1,4-dione	Menadione	CC1=CC(=O)C2=CC=CC=C2C1=O	quantified	C11H8O2	172.052	8	Metabolite
HMDB0001893	(2R)-2,5,7,8-tetramethyl-2-[(4R,8R)-4,8,12-trimethyltridecyl]-3,4-dihydro-2H-1-benzopyran-6-ol	alpha-Tocopherol	CC(C)CCC[C@@H](C)CCC[C@@H](C)CCC[C@]1(C)CCC2=C(C)C(O)=C(C)C(C)=C2O1	quantified	C29H50O2	430.381	5	Metabolite
HMDB0001894	(3S)-3-amino-3-{[(2S)-1-methoxy-1-oxo-3-phenylpropan-2-yl]carbamoyl}propanoic acid	Aspartame	COC(=O)[C@H](CC1=CC=CC=C1)NC(=O)[C@@H](N)CC(O)=O	detected	C14H18N2O5	294.122	7	Metabolite
HMDB0001895	2-hydroxybenzoic acid	Salicylic acid	OC(=O)C1=CC=CC=C1O	quantified	C7H6O3	138.032	5	Metabolite
HMDB0001896	2-(5-methoxy-1H-indol-3-yl)ethan-1-ol	5-Methoxytryptophol	COC1=CC=C2NC=C(CCO)C2=C1	quantified	C11H13N1O2	191.095	6	Metabolite
HMDB0001897	(2S)-2-[(2R)-2-{[(2S)-1-[(2S)-6-amino-2-{[(2R)-1-[(2S)-2-amino-5-carbamimidamidopentanoyl]pyrrolidin-2-yl]formamido}hexanoyl]pyrrolidin-2-yl]formamido}-4-carbamoylbutanamido]-N-[(1R)-1-{[(1R)-1-[({[(1R)-1-{[(1S)-1-carbamoyl-3-(methylsulfanyl)propyl]carbamoyl}-3-methylbutyl]carbamoyl}methyl)carbamoyl]-2-phenylethyl]carbamoyl}-2-phenylethyl]pentanediamide	Substance P	CSCC[C@H](NC(=O)[C@@H](CC(C)C)NC(=O)CNC(=O)[C@@H](CC1=CC=CC=C1)NC(=O)[C@@H](CC1=CC=CC=C1)NC(=O)[C@H](CCC(N)=O)NC(=O)[C@@H](CCC(N)=O)NC(=O)[C@@H]1CCCN1C(=O)[C@H](CCCCN)NC(=O)[C@H]1CCCN1C(=O)[C@@H](N)CCCNC(N)=N)C(N)=O	quantified	C63H98N18O13S1	1346.73	24	Metabolite
HMDB0001898	3-(2-{[3-(2-carboxyethyl)-5-[(4-ethyl-3-methyl-5-oxo-2,5-dihydro-1H-pyrrol-2-yl)methyl]-4-methyl-1H-pyrrol-2-yl]methyl}-5-[(3-ethyl-4-methyl-5-oxo-2,5-dihydro-1H-pyrrol-2-yl)methyl]-4-methyl-1H-pyrrol-3-yl)propanoic acid	Mesobilirubinogen	CCC1=C(C)C(=O)NC1CC1=C(C)C(CCC(O)=O)=C(CC2=C(CCC(O)=O)C(C)=C(CC3NC(=O)C(CC)=C3C)N2)N1	detected	C33H44N4O6	592.326	14	Metabolite
HMDB0001900	(3R,4S,5R)-3,4-dihydroxy-5-(hydroxymethyl)oxolan-2-one	Ribonolactone	OC[C@H]1OC(=O)[C@H](O)[C@@H]1O	quantified	C5H8O5	148.037	2	Metabolite
HMDB0001901	6-aminohexanoic acid	Aminocaproic acid	NCCCCCC(O)=O	quantified	C6H13N1O2	131.095	1	Metabolite
HMDB0001902	2-(4-{4-[(4-{[(2-amino-4-oxo-1,4-dihydropteridin-6-yl)methyl]amino}phenyl)formamido]-4-carboxybutanamido}-4-carboxybutanamido)pentanedioic acid	Pteroyltriglutamic acid	NC1=NC(=O)C2=NC(CNC3=CC=C(C=C3)C(=O)NC(CCC(=O)NC(CCC(=O)NC(CCC(O)=O)C(O)=O)C(O)=O)C(O)=O)=CN=C2N1	expected	C29H33N9O12	699.225	18	Metabolite
HMDB0001903	(1R,3S,5Z)-5-{2-[(1R,3aS,4E,7aR)-1-[(2R)-6-hydroxy-6-methylheptan-2-yl]-7a-methyl-octahydro-1H-inden-4-ylidene]ethylidene}-4-methylidenecyclohexane-1,3-diol	Calcitriol	C[C@H](CCCC(C)(C)O)[C@@]1([H])CC[C@@]2([H])\C(CCC[C@]12C)=C\C=C1\C[C@@H](O)C[C@H](O)C1=C	quantified	C27H44O3	416.329	6	Metabolite
HMDB0001904	(2S)-2-amino-3-(4-hydroxy-3-nitrophenyl)propanoic acid	3-Nitrotyrosine	N[C@@H](CC1=CC=C(O)C(=C1)[N+]([O-])=O)C(O)=O	quantified	C9H10N2O5	226.059	6	Metabolite
HMDB0001906	2-amino-2-methylpropanoic acid	2-Aminoisobutyric acid	CC(C)(N)C(O)=O	quantified	C4H9N1O2	103.063	1	Metabolite
HMDB0001908	(5Z)-7-[(1R,2R,3R)-2-[(1E,3S,7R)-3,7-dihydroxyoct-1-en-1-yl]-3-hydroxy-5-oxocyclopentyl]hept-5-enoic acid	19-Hydroxy-PGE2	C[C@@H](O)CCC[C@H](O)\C=C\[C@H]1[C@H](O)CC(=O)[C@@H]1C\C=C/CCCC(O)=O	expected	C20H32O6	368.22	5	Metabolite
HMDB0001913	6-methoxy-2-[(4-methoxy-3,5-dimethylpyridin-2-yl)methanesulfinyl]-1H-1,3-benzodiazole	Omeprazole	COC1=CC2=C(C=C1)N=C(N2)S(=O)CC1=NC=C(C)C(OC)=C1C	quantified	C17H19N3O3S1	345.115	10	Metabolite
HMDB0001915	(4-amino-1-hydroxy-1-phosphonobutyl)phosphonic acid	Alendronic acid	NCCCC(O)(P(O)(O)=O)P(O)(O)=O	expected	C4H13N1O7P2	249.017	0	Metabolite
HMDB0001917	4-[(1S,2S,5S,7R,10R,11S,14R,15S,16R)-5-{[(2R,4S,5S,6R)-5-{[(2S,4S,5S,6R)-5-{[(2S,4S,5S,6R)-4,5-dihydroxy-6-methyloxan-2-yl]oxy}-4-hydroxy-6-methyloxan-2-yl]oxy}-4-hydroxy-6-methyloxan-2-yl]oxy}-11,16-dihydroxy-2,15-dimethyltetracyclo[8.7.0.0?7.0????????,?]heptadecan-14-yl]-2,5-dihydrofuran-2-one	Digoxin	[H][C@]12CC[C@]3([H])[C@]([H])(C[C@@H](O)[C@]4(C)[C@H](CC[C@]34O)C3=CC(=O)OC3)[C@@]1(C)CC[C@@H](C2)O[C@H]1C[C@H](O)[C@H](O[C@H]2C[C@H](O)[C@H](O[C@H]3C[C@H](O)[C@H](O)[C@@H](C)O3)[C@@H](C)O2)[C@@H](C)O1	quantified	C41H64O14	780.43	10	Metabolite
HMDB0001919	3-[({2-[(diaminomethylidene)amino]-1,3-thiazol-4-yl}methyl)sulfanyl]-N'-sulfamoylpropanimidamide	Famotidine	NC(N)=NC1=NC(CSCCC(N)=NS(N)(=O)=O)=CS1	quantified	C8H15N7O2S3	337.045	5	Metabolite
HMDB0001920	(1R,9R,10R)-4-methoxy-17-methyl-17-azatetracyclo[7.5.3.0?????????.0?7]heptadeca-2(7),3,5-triene	Dextromethorphan	[H][C@@]12CCCC[C@@]11CCN(C)[C@@H]2CC2=C1C=C(OC)C=C2	quantified	C18H25N1O1	271.194	7	Metabolite
HMDB0001921	1-carbamimidamido-N,N-dimethylmethanimidamide	1,1-Dimethylbiguanide	CN(C)C(=N)NC(N)=N	quantified	C4H11N5	129.101	2	Metabolite
HMDB0001922	1-[(2-chlorophenyl)diphenylmethyl]-1H-imidazole	Clotrimazole	ClC1=CC=CC=C1C(N1C=CN=C1)(C1=CC=CC=C1)C1=CC=CC=C1	expected	C22Cl1H17N2	344.108	15	Metabolite
HMDB0001923	(2S)-2-(6-methoxynaphthalen-2-yl)propanoic acid	Naproxen	COC1=CC2=C(C=C1)C=C(C=C2)[C@H](C)C(O)=O	quantified	C14H14O3	230.094	8	Metabolite
HMDB0001924	2-(4-{2-hydroxy-3-[(propan-2-yl)amino]propoxy}phenyl)acetamide	Atenolol	CC(C)NCC(O)COC1=CC=C(CC(N)=O)C=C1	quantified	C14H22N2O3	266.163	5	Metabolite
HMDB0001925	2-[4-(2-methylpropyl)phenyl]propanoic acid	Ibuprofen	CC(C)CC1=CC=C(C=C1)C(C)C(O)=O	quantified	C13H18O2	206.131	5	Metabolite
HMDB0001926	(1S,10R,11S,14R,15S)-14-ethynyl-15-methyltetracyclo[8.7.0.0?7.0????????,?]heptadeca-2(7),3,5-triene-5,14-diol	17a-Ethynylestradiol	[H][C@@]12CC[C@@](O)(C#C)[C@@]1(C)CC[C@]1([H])C3=C(CC[C@@]21[H])C=C(O)C=C3	quantified	C20H24O2	296.178	9	Metabolite
HMDB0001927	[2-(diphenylmethoxy)ethyl]dimethylamine	Diphenhydramine	CN(C)CCOC(C1=CC=CC=C1)C1=CC=CC=C1	quantified	C17H21N1O1	255.162	8	Metabolite
HMDB0001928	6-chloro-1,1-dioxo-3,4-dihydro-2H-1<U+03BB>6,2,4-benzothiadiazine-7-sulfonamide	Hydrochlorothiazide	NS(=O)(=O)C1=C(Cl)C=C2NCNS(=O)(=O)C2=C1	quantified	C7Cl1H8N3O4S2	296.964	5	Metabolite
HMDB0001929	(2S)-7-fluoro-2-methyl-6-(4-methylpiperazin-1-yl)-10-oxo-4-oxa-1-azatricyclo[7.3.1.05,????????]trideca-5(13),6,8,11-tetraene-11-carboxylic acid	Levofloxacin	C[C@H]1COC2=C3N1C=C(C(O)=O)C(=O)C3=CC(F)=C2N1CCN(C)CC1	quantified	C18F1H20N3O4	361.144	10	Metabolite
HMDB0001930	dimethyl[(5-{[(2-{[(E)-1-(methylamino)-2-nitroethenyl]amino}ethyl)sulfanyl]methyl}furan-2-yl)methyl]amine	Ranitidine	CN\C(NCCSCC1=CC=C(CN(C)C)O1)=C/[N+]([O-])=O	quantified	C13H22N4O3S1	314.141	5	Metabolite
HMDB0001931	3-(6-hydroxy-2,7,8-trimethyl-3,4-dihydro-2H-1-benzopyran-2-yl)propanoic acid	gamma-CEHC	CC1=C(O)C=C2CCC(C)(CCC(O)=O)OC2=C1C	quantified	C15H20O4	264.136	6	Metabolite
HMDB0001932	1-[4-(2-methoxyethyl)phenoxy]-3-[(propan-2-yl)amino]propan-2-ol	Metoprolol	COCCC1=CC=C(OCC(O)CNC(C)C)C=C1	quantified	C15H25N1O3	267.183	4	Metabolite
HMDB0001933	4-chloro-2-[(furan-2-ylmethyl)amino]-5-sulfamoylbenzoic acid	Furosemide	NS(=O)(=O)C1=C(Cl)C=C(NCC2=CC=CO2)C(=C1)C(O)=O	detected	C12Cl1H11N2O5S1	330.008	8	Metabolite
HMDB0001934	3-[(2S)-1-methylpyrrolidin-2-yl]pyridine	Nicotine	[H][C@]1(CCCN1C)C1=CC=CN=C1	quantified	C10H14N2	162.116	5	Metabolite
HMDB0001935	4-hydroxy-3-(3-oxo-1-phenylbutyl)-2H-chromen-2-one	Warfarin	CC(=O)CC(C1=CC=CC=C1)C1=C(O)C2=C(OC1=O)C=CC=C2	expected	C19H16O4	308.105	12	Metabolite
HMDB0001936	dimethyl({2-[1-phenyl-1-(pyridin-2-yl)ethoxy]ethyl})amine	Doxylamine	CN(C)CCOC(C)(C1=CC=CC=C1)C1=CC=CC=N1	expected	C17H22N2O1	270.173	8	Metabolite
HMDB0001937	4-[2-(tert-butylamino)-1-hydroxyethyl]-2-(hydroxymethyl)phenol	Salbutamol	CC(C)(C)NCC(O)C1=CC(CO)=C(O)C=C1	expected	C13H21N1O3	239.152	4	Metabolite
HMDB0001938	(2S)-1-[(2S)-6-amino-2-{[(1S)-1-carboxy-3-phenylpropyl]amino}hexanoyl]pyrrolidine-2-carboxylic acid	Lisinopril	NCCCC[C@H](N[C@@H](CCC1=CC=CC=C1)C(O)=O)C(=O)N1CCC[C@H]1C(O)=O	expected	C21H31N3O5	405.226	8	Metabolite
HMDB0001939	(1S,2R,8S,10R,11S,14R,15S)-14-acetyl-14-hydroxy-2,8,15-trimethyltetracyclo[8.7.0.0?7.0????????,?]heptadec-6-en-5-one	Medroxyprogesterone	[H][C@@]12CC[C@](O)(C(C)=O)[C@@]1(C)CC[C@@]1([H])[C@@]2([H])C[C@H](C)C2=CC(=O)CC[C@]12C	expected	C22H32O3	344.235	7	Metabolite
HMDB0001940	6-phenylpteridine-2,4,7-triamine	Triamterene	NC1=NC(N)=C2N=C(C(N)=NC2=N1)C1=CC=CC=C1	detected	C12H11N7	253.108	11	Metabolite
HMDB0001941	[3-(4-bromophenyl)-3-(pyridin-2-yl)propyl]dimethylamine	Brompheniramine	CN(C)CCC(C1=CC=C(Br)C=C1)C1=CC=CC=N1	quantified	Br1C16H19N2	318.073	8	Metabolite
HMDB0001942	(1S,2R)-2-amino-1-phenylpropan-1-ol	Phenylpropanolamine	C[C@@H](N)[C@@H](O)C1=CC=CC=C1	quantified	C9H13N1O1	151.1	4	Metabolite
HMDB0001943	(1S,2S)-2-(methylamino)-1-phenylpropan-1-ol	Pseudoephedrine	CN[C@@H](C)[C@@H](O)C1=CC=CC=C1	quantified	C10H15N1O1	165.115	4	Metabolite
HMDB0001944	[3-(4-chlorophenyl)-3-(pyridin-2-yl)propyl]dimethylamine	Chlorpheniramine	CN(C)CCC(C1=CC=C(Cl)C=C1)C1=CC=CC=N1	expected	C16Cl1H19N2	274.124	8	Metabolite
HMDB0001952	3-[9,14,20-tris(2-carboxyethyl)-10,19-bis(carboxymethyl)-5,15-dimethyl-21,22,23,24-tetraazapentacyclo[16.2.1.1?6.18,????????.1????????,?]tetracosa-1(21),2,4,6,8(23),9,11,13,15,17,19-undecaen-4-yl]propanoic acid	Hexacarboxylporphyrin III	CC1=C(CCC(O)=O)/C2=C/C3=N/C(=C\C4=C(C)C(CCC(O)=O)=C(N4)/C=C4\N=C(\C=C\1/N\2)C(CCC(O)=O)=C4CC(O)=O)/C(CC(O)=O)=C3CCC(O)=O	expected	C38H38N4O12	742.249	22	Metabolite
HMDB0001954	3-hydroxyoctanoic acid	3-Hydroxyoctanoic acid	CCCCCC(O)CC(O)=O	quantified	C8H16O3	160.11	1	Metabolite
HMDB0001955	3-phenylbutanoic acid	3-Phenylbutyric acid	CC(CC(O)=O)C1=CC=CC=C1	expected	C10H12O2	164.084	5	Metabolite
HMDB0001956	3-[9,10,14,19-tetrakis(2-carboxyethyl)-15,20-bis(carboxymethyl)-5-methyl-21,22,23,24-tetraazapentacyclo[16.2.1.1?6.18,????????.1????????,?]tetracosa-1,3,5,7,9,11(23),12,14,16,18(21),19-undecaen-4-yl]propanoic acid	Heptacarboxylporphyrin III	CC1=C2NC(\C=C3/N=C(/C=C4\N\C(=C/C5=N/C(=C\2)/C(CCC(O)=O)=C5CCC(O)=O)C(CCC(O)=O)=C4CC(O)=O)C(CCC(O)=O)=C3CC(O)=O)=C1CCC(O)=O	expected	C40H40N4O14	800.254	23	Metabolite
HMDB0001957	3-[(12Z,17Z)-10,15,20-tris(2-carboxyethyl)-19-(carboxymethyl)-5,9,14-trimethyl-21,22,23,24-tetraazapentacyclo[16.2.1.1?6.18,????????.1????????,?]tetracosa-1,3(24),4,8,10,12,14,16(22),17,19-decaen-4-yl]propanoic acid	Pentacarboxyl porphyrinogen III	CC1=C(CCC(O)=O)C2=NC1CC1=C(C)C(CCC(O)=O)=C(N1)\C=C1/N=C(/C=C3\N\C(=C/2)C(CCC(O)=O)=C3CC(O)=O)C(CCC(O)=O)=C1C	expected	C37H40N4O10	700.274	20	Metabolite
HMDB0001958	2,6,10,14-tetramethylpentadecanal	Pristanal	CC(C)CCCC(C)CCCC(C)CCCC(C)C=O	expected	C19H38O1	282.292	1	Metabolite
HMDB0001959	6-amino-2-(4-aminobutanamido)hexanoic acid	Gamma-Aminobutyryl-lysine	NCCCCC(NC(=O)CCCN)C(O)=O	quantified	C10H21N3O3	231.158	2	Metabolite
HMDB0001961	2-amino-9-[(2R,3R,4S,5R)-4-hydroxy-5-(hydroxymethyl)-3-oxidooxolan-2-yl]-1,7-dimethyl-6-oxo-6,7-dihydro-1H-9<U+03BB>5-purin-9-ylium	1,7-Dimethylguanosine	CN1C=[N+]([C@@H]2O[C@H](CO)[C@@H](O)[C@H]2[O-])C2=C1C(=O)N(C)C(N)=N2	expected	C12H17N5O5	311.123	7	Metabolite
HMDB0001964	(2Z)-3-(3,4-dihydroxyphenyl)prop-2-enoic acid	Caffeic acid	OC(=O)\C=C/C1=CC=C(O)C(O)=C1	quantified	C9H8O4	180.042	6	Metabolite
HMDB0001965	(5Z,8Z,11S,12R,14Z)-10,11,12-trihydroxyicosa-5,8,14-trienoic acid	Troxilin B3	CCCCC\C=C/C[C@@H](O)[C@H](O)C(O)\C=C/C\C=C/CCCC(O)=O	expected	C20H34O5	354.241	4	Metabolite
HMDB0001966	titanium(4+) ion	Titanium	[Ti+4]	quantified	H-4Ti1	43.9166	3	Adduct
HMDB0001967	methanedione	Carbon dioxide	O=C=O	quantified	C1O2	43.9898	2	Adduct
HMDB0001968	(1S,2S,5R,7S,9R,10R,11S,14R,15R,16S)-14-[(2R)-4-hydroxy-6-methylheptan-2-yl]-2,15-dimethyltetracyclo[8.7.0.0?7.0????????,?]heptadecane-5,9,16-triol	5b-Cholestane-3a,7a,12a,23-Tetrol	[H][C@@]1(CC[C@@]2([H])[C@]3([H])[C@H](O)C[C@]4([H])C[C@H](O)CC[C@]4(C)[C@@]3([H])C[C@H](O)[C@]12C)[C@H](C)CC(O)CC(C)C	expected	C27H48O4	436.355	4	Metabolite
HMDB0001970	3-methyl-2,3,6,7,8,9-hexahydro-1H-purine-2,6,8-trione	3-Methyluric acid	CN1C2=C(NC(=O)N2)C(=O)NC1=O	detected	C6H6N4O3	182.044	6	Metabolite
HMDB0001972	3-amino-2-hydroxybenzoic acid	3-Aminosalicylic acid	NC1=CC=CC(C(O)=O)=C1O	quantified	C7H7N1O3	153.043	5	Metabolite
HMDB0001973	9-methyl-2,3,6,7,8,9-hexahydro-1H-purine-2,6,8-trione	9-Methyluric acid	CN1C(=O)NC2=C1NC(=O)NC2=O	expected	C6H6N4O3	182.044	6	Metabolite
HMDB0001975	2-ethyl-2-hydroxybutanoic acid	2-Ethyl-2-Hydroxybutyric acid	CCC(O)(CC)C(O)=O	expected	C6H12O3	132.079	1	Metabolite
HMDB0001976	(4Z,7Z,10Z,13Z,16Z)-docosa-4,7,10,13,16-pentaenoic acid	Docosapentaenoic acid (22n-6)	CCCCC\C=C/C\C=C/C\C=C/C\C=C/C\C=C/CCC(O)=O	quantified	C22H34O2	330.256	6	Metabolite
HMDB0001977	(5Z,9E,11R,12S,14Z)-8,11,12-trihydroxyicosa-5,9,14-trienoic acid	Trioxilin A3	CCCCC\C=C/C[C@H](O)[C@H](O)\C=C\C(O)C\C=C/CCCC(O)=O	expected	C20H34O5	354.241	4	Metabolite
HMDB0001978	5-oxo-4,5-dihydropyrazine-2-carboxamide	5-Hydroxypyrazinamide	NC(=O)C1=CNC(=O)C=N1	expected	C5H5N3O2	139.038	5	Metabolite
HMDB0001979	7-[(1R,2R,3R,5S)-3,5-dihydroxy-2-[(1E)-3-oxooct-1-en-1-yl]cyclopentyl]-6-oxoheptanoic acid	6,15-Diketo,13,14-dihydro-PGF1a	CCCCCC(=O)\C=C\[C@H]1[C@H](O)C[C@H](O)[C@@H]1CC(=O)CCCCC(O)=O	expected	C20H32O6	368.22	5	Metabolite
HMDB0001980	6-amino-2-{[(2S)-1-[(4R,7S,10S,13S,16S,19R)-19-amino-13-benzyl-10-(2-carbamoylethyl)-7-(carbamoylmethyl)-16-[(4-hydroxyphenyl)methyl]-6,9,12,15,18-pentaoxo-1,2-dithia-5,8,11,14,17-pentaazacycloicosane-4-carbonyl]pyrrolidin-2-yl]formamido}-N-(carbamoylmethyl)hexanamide	Vasopressin	NCCCCC(NC(=O)[C@@H]1CCCN1C(=O)[C@@H]1CSSC[C@H](N)C(=O)N[C@@H](CC2=CC=C(O)C=C2)C(=O)N[C@@H](CC2=CC=CC=C2)C(=O)N[C@@H](CCC(N)=O)C(=O)N[C@@H](CC(N)=O)C(=O)N1)C(=O)NCC(N)=O	quantified	C46H65N13O12S2	1055.43	21	Metabolite
HMDB0001981	(3S)-3-hydroxy-5-{[hydroxy(phosphonooxy)phosphoryl]oxy}-3-methylpentanoic acid	(R)-Mevalonic acid-5-pyrophosphate	C[C@](O)(CCOP(O)(=O)OP(O)(O)=O)CC(O)=O	expected	C6H14O10P2	308.006	1	Metabolite
HMDB0001982	3,7-dimethyl-2,3,6,7,8,9-hexahydro-1H-purine-2,6,8-trione	3,7-Dimethyluric acid	CN1C(=O)NC2=C1C(=O)NC(=O)N2C	detected	C7H8N4O3	196.06	6	Metabolite
HMDB0001983	(2R,3R,4S,5R)-2-(6-amino-9H-purin-9-yl)-5-methyloxolane-3,4-diol	5'-Deoxyadenosine	C[C@H]1O[C@H]([C@H](O)[C@@H]1O)N1C=NC2=C(N)N=CN=C12	quantified	C10H13N5O3	251.102	7	Metabolite
HMDB0001984	(1S,2R,7R,10S,11S,14S,15S)-N-tert-butyl-2,15-dimethyl-5-oxo-6-azatetracyclo[8.7.0.0^{2,7}.0^{11,15}]heptadec-3-ene-14-carboxamide	Finasteride	[H][C@@]12CC[C@H](C(=O)NC(C)(C)C)[C@@]1(C)CC[C@@]1([H])[C@@]2([H])CC[C@@]2([H])NC(=O)C=C[C@]12C	expected	C23H36N2O2	372.278	7	Metabolite
HMDB0001986	N-[(2S,3R,4R,5S,6R)-2-{[(2R,3S,4S,5R,6S)-3,5-dihydroxy-2-(hydroxymethyl)-6-{[(2R,3R,4R,5S)-1,2,5-trihydroxy-6-oxo-4-{[(2S,3S,4R,5S,6S)-3,4,5-trihydroxy-6-methyloxan-2-yl]oxy}hexan-3-yl]oxy}oxan-4-yl]oxy}-6-(hydroxymethyl)-4-{[(2R,3R,4S,5R,6R)-3,4,5-trihydroxy-6-(hydroxymethyl)oxan-2-yl]oxy}-5-{[(2S,3S,4R,5S,6S)-3,4,5-trihydroxy-6-methyloxan-2-yl]oxy}oxan-3-yl]acetamide	Lacto-N-difucopentaose II	[H][C@@](O[C@@H]1O[C@H](CO)[C@H](O)[C@]([H])(O[C@@H]2O[C@H](CO)[C@@H](O[C@]3([H])O[C@@H](C)[C@@H](O)[C@@H](O)[C@@H]3O)[C@H](O[C@]3([H])O[C@H](CO)[C@H](O)[C@H](O)[C@H]3O)[C@H]2NC(C)=O)[C@H]1O)([C@H](O)CO)[C@]([H])(O[C@@H]1O[C@@H](C)[C@@H](O)[C@@H](O)[C@@H]1O)[C@H](O)C=O	quantified	C38H65N1O29	999.364	7	Metabolite
HMDB0001987	2-hydroxy-2-methylbutanoic acid	2-Hydroxy-2-methylbutyric acid	CCC(C)(O)C(O)=O	quantified	C5H10O3	118.063	1	Metabolite
HMDB0001988	4-hydroxycyclohexane-1-carboxylic acid	4-Hydroxycyclohexylcarboxylic acid	OC1CCC(CC1)C(O)=O	quantified	C7H12O3	144.079	2	Metabolite
HMDB0001991	7-methyl-2,3,6,7-tetrahydro-1H-purine-2,6-dione	7-Methylxanthine	CN1C=NC2=C1C(=O)NC(=O)N2	quantified	C6H6N4O2	166.049	6	Metabolite
HMDB0001993	(1S,2R,9R,10S,11S,14R,15R)-9-hydroxy-2,15-dimethyl-14-[(2R)-6-methylheptan-2-yl]tetracyclo[8.7.0.0?7.0????????,?]heptadec-6-en-5-one	7a-Hydroxy-cholestene-3-one	[H][C@@]1(CC[C@@]2([H])[C@]3([H])[C@H](O)CC4=CC(=O)CC[C@]4(C)[C@@]3([H])CC[C@]12C)[C@H](C)CCCC(C)C	quantified	C27H44O2	400.334	6	Metabolite
HMDB0001999	(5Z,8Z,11Z,14Z,17Z)-icosa-5,8,11,14,17-pentaenoic acid	Eicosapentaenoic acid	CC\C=C/C\C=C/C\C=C/C\C=C/C\C=C/CCCC(O)=O	quantified	C20H30O2	302.225	6	Metabolite
HMDB0002000	(9Z)-tetradec-9-enoic acid	Myristoleic acid	CCCC\C=C/CCCCCCCC(O)=O	quantified	C14H26O2	226.193	2	Metabolite
HMDB0002001	dimethylpropanedioic acid	Dimethylmalonic acid	CC(C)(C(O)=O)C(O)=O	detected	C5H8O4	132.042	2	Metabolite
HMDB0002003	tetracosanoic acid	Tetracosanoic acid	CCCCCCCCCCCCCCCCCCCCCCCC(O)=O	quantified	C24H48O2	368.365	1	Metabolite
HMDB0002004	[2-(5-methoxy-1H-indol-3-yl)ethyl]dimethylamine	5-Methoxydimethyltryptamine	COC1=CC2=C(NC=C2CCN(C)C)C=C1	quantified	C13H18N2O1	218.142	6	Metabolite
HMDB0002005	2-amino-4-methanesulfinylbutanoic acid	Methionine sulfoxide	CS(=O)CCC(N)C(O)=O	quantified	C5H11N1O3S1	165.046	1	Metabolite
HMDB0002006	(2S)-2,3-diaminopropanoic acid	2,3-Diaminopropionic acid	NC[C@H](N)C(O)=O	quantified	C3H8N2O2	104.059	1	Metabolite
HMDB0002007	(6Z,9Z,12Z,15Z,18Z,21Z)-tetracosa-6,9,12,15,18,21-hexaenoic acid	Tetracosahexaenoic acid	CC\C=C/C\C=C/C\C=C/C\C=C/C\C=C/C\C=C/CCCCC(O)=O	expected	C24H36O2	356.272	7	Metabolite
HMDB0002009	{[(2R,3S,4R,5R)-5-(6-amino-9H-purin-9-yl)-2-{[({[(3-{[2-({2-[(2E)-but-2-enoylsulfanyl]ethyl}carbamoyl)ethyl]carbamoyl}-3-hydroxy-2,2-dimethylpropoxy)(hydroxy)phosphoryl]oxy}(hydroxy)phosphoryl)oxy]methyl}-4-hydroxyoxolan-3-yl]oxy}phosphonic acid	Crotonoyl-CoA	C\C=C\C(=O)SCCNC(=O)CCNC(=O)C(O)C(C)(C)COP(O)(=O)OP(O)(=O)OC[C@H]1O[C@H]([C@H](O)[C@@H]1OP(O)(O)=O)N1C=NC2=C(N)N=CN=C12	expected	C25H40N7O17P3S1	835.141	11	Metabolite
HMDB0002011	4-hydroxy-3-methylbutanoic acid	4-Hydroxyisovaleric acid	CC(CO)CC(O)=O	detected	C5H10O3	118.063	1	Metabolite
HMDB0002012	2,3-dimethoxy-5-methyl-6-(3-methylbut-2-en-1-yl)cyclohexa-2,5-diene-1,4-dione	Ubiquinone-1	COC1=C(OC)C(=O)C(CC=C(C)C)=C(C)C1=O	quantified	C14H18O4	250.121	6	Metabolite
HMDB0002013	(3R)-3-(butanoyloxy)-4-(trimethylazaniumyl)butanoate	Butyrylcarnitine	CCCC(=O)O[C@H](CC([O-])=O)C[N+](C)(C)C	quantified	C11H21N1O4	231.147	2	Metabolite
HMDB0002014	3-[(5Z)-tetradec-5-enoyloxy]-4-(trimethylazaniumyl)butanoate	cis-5-Tetradecenoylcarnitine	CCCCCCCC\C=C/CCCC(=O)OC(CC([O-])=O)C[N+](C)(C)C	quantified	C21H39N1O4	369.288	3	Metabolite
HMDB0002015	(5R)-2,5,6,7-tetrahydro-1,4-thiazepine-3,5-dicarboxylic acid	Cystathionine ketimine	OC(=O)[C@H]1CCSCC(=N1)C(O)=O	quantified	C7H9N1O4S1	203.025	4	Metabolite
HMDB0002016	4-[amino(carboxy)methyl]benzoic acid	4-Carboxyphenylglycine	NC(C(O)=O)C1=CC=C(C=C1)C(O)=O	expected	C9H9N1O4	195.053	6	Metabolite
HMDB0002017	1-phenylethan-1-amine	1-Phenylethylamine	CC(N)C1=CC=CC=C1	quantified	C8H11N1	121.089	4	Metabolite
HMDB0002019	(2E,7R,11R)-3,7,11,15-tetramethylhexadec-2-en-1-ol	Phytol	CC(C)CCC[C@@H](C)CCC[C@@H](C)CCC\C(C)=C\CO	detected	C20H40O1	296.308	1	Metabolite
HMDB0002020	4-[(1E,3E,5E,7E,9E,11E,13E,15E,17E)-18-(4-hydroxy-2,6,6-trimethylcyclohex-2-en-1-yl)-3,7,12,16-tetramethyloctadeca-1,3,5,7,9,11,13,15,17-nonaen-1-yl]-3,5,5-trimethylcyclohex-2-en-1-one	3'-Hydroxy-e,e-caroten-3-one	C\C(\C=C\C=C(/C)\C=C\C1C(C)=CC(O)CC1(C)C)=C/C=C/C=C(\C)/C=C/C=C(\C)/C=C/C1C(C)=CC(=O)CC1(C)C	detected	C40H54O2	566.412	14	Metabolite
HMDB0002022	{[(2R,3S,4R,5R)-5-(2-aminoacetamido)-3,4-dihydroxyoxolan-2-yl]methoxy}phosphonic acid	Glycineamideribotide	NCC(=O)N[C@@H]1O[C@H](COP(O)(O)=O)[C@@H](O)[C@H]1O	expected	C7H15N2O8P1	286.057	2	Metabolite
HMDB0002023	2-ethylhexanedioic acid	Ethyladipic acid	CCC(CCCC(O)=O)C(O)=O	expected	C8H14O4	174.089	2	Metabolite
HMDB0002024	2-(1H-imidazol-5-yl)acetic acid	Imidazoleacetic acid	OC(=O)CC1=CN=CN1	quantified	C5H6N2O2	126.043	4	Metabolite
HMDB0002025	3-hydroxy-2,3-dimethylpentanedioic acid	2,3-Dimethyl-3-hydroxyglutaric acid	CC(C(O)=O)C(C)(O)CC(O)=O	expected	C7H12O5	176.068	2	Metabolite
HMDB0002026	1,9-dimethyl-2,3,6,7,8,9-hexahydro-1H-purine-2,6,8-trione	1,9-Dimethyluric acid	CN1C(=O)NC2=C1NC(=O)N(C)C2=O	detected	C7H8N4O3	196.06	6	Metabolite
HMDB0002027	(2S,5S,11R,14R,15R)-2,15-dimethyl-14-[(2R)-6-methylheptan-2-yl]tetracyclo[8.7.0.0?7.0????????,?]heptadeca-1(10),7-dien-5-ol	8-Dehydrocholesterol	[H][C@@]1(CC[C@@]2([H])C3=C(CC[C@]12C)[C@@]1(C)CC[C@H](O)CC1=CC3)[C@H](C)CCCC(C)C	quantified	C27H44O1	384.339	6	Metabolite
HMDB0002028	(2S)-2-amino-3-[4-hydroxy-3-(sulfooxy)phenyl]propanoic acid	DOPA sulfate	N[C@@H](CC1=CC(OS(O)(=O)=O)=C(O)C=C1)C(O)=O	expected	C9H11N1O7S1	277.026	5	Metabolite
HMDB0002030	(2R,3S,4R,5R)-2-(aminomethyl)oxane-2,3,4,5-tetrol	Fructosamine	NC[C@@]1(O)OC[C@@H](O)[C@@H](O)[C@@H]1O	quantified	C6H13N1O5	179.079	1	Metabolite
HMDB0002031	3-(carbamoylamino)-2-methylpropanoic acid	Ureidoisobutyric acid	CC(CNC(N)=O)C(O)=O	quantified	C5H10N2O3	146.069	2	Metabolite
HMDB0002032	2-amino-6,7,8,9-tetrahydro-1H-purine-6,8-dione	8-Hydroxyguanine	NC1=NC2=C(NC(=O)N2)C(=O)N1	quantified	C5H5N5O2	167.044	6	Metabolite
HMDB0002034	2-amino-4-(3-amino-3-carboxypropanesulfonyl)butanoic acid	Homolanthionine	NC(CCS(=O)(=O)CCC(N)C(O)=O)C(O)=O	expected	C8H16N2O6S1	268.073	2	Metabolite
HMDB0002035	(2E)-3-(4-hydroxyphenyl)prop-2-enoic acid	4-Hydroxycinnamic acid	OC(=O)\C=C\C1=CC=C(O)C=C1	quantified	C9H8O3	164.047	6	Metabolite
HMDB0002036	trihydroxychloranediium	Chlorate	O[Cl++](O)O	expected	Cl1H1O3	83.9614	0	Adduct
HMDB0002038	(2S)-2-amino-6-(methylamino)hexanoic acid	N(6)-Methyllysine	CNCCCC[C@H](N)C(O)=O	quantified	C7H16N2O2	160.121	1	Metabolite
HMDB0002039	pyrrolidin-2-one	2-Pyrrolidinone	O=C1CCCN1	quantified	C4H7N1O1	85.0528	2	Metabolite
HMDB0002040	(2E)-3-(4-methoxyphenyl)prop-2-enoic acid	4-Methoxycinnamic acid	COC1=CC=C(\C=C\C(O)=O)C=C1	quantified	C10H10O3	178.063	6	Metabolite
HMDB0002042	2-[(3-oxo-3-phenylpropyl)amino]acetic acid	3-Phenylpropionylglycine	OC(=O)CNCCC(=O)C1=CC=CC=C1	expected	C11H13N1O3	207.09	6	Metabolite
HMDB0002043	5-phenylpentanoic acid	5-Phenylvaleric acid	OC(=O)CCCCC1=CC=CC=C1	detected	C11H14O2	178.099	5	Metabolite
HMDB0002044	2-amino-9-[(2R,3R,4S,5R)-3,4-dihydroxy-5-(hydroxymethyl)oxolan-2-yl]-6,7,8,9-tetrahydro-1H-purine-6,8-dione	8-Hydroxyguanosine	NC1=NC2=C(NC(=O)N2[C@@H]2O[C@H](CO)[C@@H](O)[C@H]2O)C(=O)N1	quantified	C10H13N5O6	299.087	7	Metabolite
HMDB0002048	3-methylphenol	m-Cresol	CC1=CC=CC(O)=C1	quantified	C7H8O1	108.058	4	Metabolite
HMDB0002050	3,4,4-trihydroxy-2-oxobut-3-enoic acid	Dihydroxyfumaric acid	OC(O)=C(O)C(=O)C(O)=O	expected	C4H4O6	148.001	3	Metabolite
HMDB0002052	(2Z)-4,6-dioxooct-2-enedioic acid	Maleylacetoacetic acid	OC(=O)CC(=O)CC(=O)\C=C/C(O)=O	expected	C8H8O6	200.032	5	Metabolite
HMDB0002053	(3S,9aS)-3-(1H-imidazol-5-ylmethyl)-octahydro-1H-pyrido[1,2-a]piperazine-1,4-dione	Histidylproline diketopiperazine	[H][C@@]12CCCCN1C(=O)[C@H](CC1=CN=CN1)NC2=O	quantified	C12H16N4O2	248.127	7	Metabolite
HMDB0002054	{[(2R,3S,4R,5R)-5-(6-amino-9H-purin-9-yl)-4-hydroxy-2-({[hydroxy({hydroxy[3-hydroxy-2,2-dimethyl-3-({2-[(2-{[(2E)-2-methylbut-2-enoyl]sulfanyl}ethyl)carbamoyl]ethyl}carbamoyl)propoxy]phosphoryl}oxy)phosphoryl]oxy}methyl)oxolan-3-yl]oxy}phosphonic acid	Tiglyl-CoA	C\C=C(/C)C(=O)SCCNC(=O)CCNC(=O)C(O)C(C)(C)COP(O)(=O)OP(O)(=O)OC[C@H]1O[C@H]([C@H](O)[C@@H]1OP(O)(O)=O)N1C=NC2=C(N)N=CN=C12	expected	C26H42N7O17P3S1	849.157	11	Metabolite
HMDB0002055	2-methylphenol	o-Cresol	CC1=CC=CC=C1O	quantified	C7H8O1	108.058	4	Metabolite
HMDB0002056	2-[(2-methylpropoxy)carbonyl]benzoic acid	Monoisobutyl phthalic acid	CC(C)COC(=O)C1=CC=CC=C1C(O)=O	quantified	C12H14O4	222.089	6	Metabolite
HMDB0002057	{[(2R,3S,4R,5R)-5-(6-amino-9H-purin-9-yl)-4-hydroxy-2-({[hydroxy({[hydroxy(3-hydroxy-2,2-dimethyl-3-{[2-({2-[(2,6,10,14-tetramethyl-3-oxopentadecanoyl)sulfanyl]ethyl}carbamoyl)ethyl]carbamoyl}propoxy)phosphoryl]oxy})phosphoryl]oxy}methyl)oxolan-3-yl]oxy}phosphonic acid	Pristanoyl-CoA	CC(C)CCCC(C)CCCC(C)CCC(=O)C(C)C(=O)SCCNC(=O)CCNC(=O)C(O)C(C)(C)COP(O)(=O)OP(O)(=O)OC[C@H]1O[C@H]([C@H](O)[C@@H]1OP(O)(O)=O)N1C=NC2=C(N)N=CN=C12	expected	C40H70N7O18P3S1	1061.37	11	Metabolite
HMDB0002059	12-hydroxydodecanoic acid	12-Hydroxydodecanoic acid	OCCCCCCCCCCCC(O)=O	expected	C12H24O3	216.173	1	Metabolite
HMDB0002060	N-[(2R,3R,4S,5R)-3-{[(2R,3R,4S,5R,6R)-4,5-dihydroxy-6-(hydroxymethyl)-3-{[(2S,3S,4R,5S,6S)-3,4,5-trihydroxy-6-methyloxan-2-yl]oxy}oxan-2-yl]oxy}-4,5,6-trihydroxy-1-oxohexan-2-yl]acetamide	O-6-deoxy-a-L-galactopyranosyl-(1->2)-O-b-D-galactopyranosyl-(1->3)-2-(acetylamino)-2-deoxy-D-Galactose	C[C@@H]1O[C@@H](O[C@@H]2[C@@H](O)[C@@H](O)[C@@H](CO)O[C@H]2O[C@@H]([C@@H](O)[C@H](O)CO)[C@@H](NC(C)=O)C=O)[C@@H](O)[C@H](O)[C@@H]1O	expected	C20H35N1O15	529.201	4	Metabolite
HMDB0002062	{4-[(1R)-2-amino-1-hydroxyethyl]-2-hydroxyphenyl}oxidanesulfonic acid	Norepinephrine sulfate	NC[C@H](O)C1=CC(O)=C(OS(O)(=O)=O)C=C1	quantified	C8H11N1O6S1	249.031	4	Metabolite
HMDB0002063	heptacosanoic acid	Heptacosanoic acid	CCCCCCCCCCCCCCCCCCCCCCCCCCC(O)=O	expected	C27H54O2	410.412	1	Metabolite
HMDB0002064	N-(4-aminobutyl)acetamide	N-Acetylputrescine	CC(=O)NCCCCN	quantified	C6H14N2O1	130.111	1	Metabolite
HMDB0002065	2-amino-6-(2-hydroxypropanoyl)-3,4,5,6,7,8-hexahydropteridin-4-one	6-Lactoyltetrahydropterin	CC(O)C(=O)C1CNC2=C(N1)C(=O)NC(N)=N2	expected	C9H13N5O3	239.102	6	Metabolite
HMDB0002067	N-[(3R,4S,5R)-6-{[(2R,3R,4R,6R)-3-acetamido-4-hydroxy-6-(hydroxymethyl)-5-{[(2S,3R,6R)-3,4,5-trihydroxy-6-(hydroxymethyl)oxan-2-yl]oxy}oxan-2-yl]oxy}-4,5-dihydroxy-1-oxo-3-{[(2R,3R,4S,5R,6R)-3,4,5-trihydroxy-6-(hydroxymethyl)oxan-2-yl]oxy}hexan-2-yl]acetamide	O-b-D-Gal-(1->3)-O-[O-b-D-Gal-(1->4)-2-(acetylamino)-2-deoxy-b-D-Glc-(1->6)]-2-(acetylamino)-2-deoxy- D-Galactose	CC(=O)NC(C=O)[C@@H](O[C@@H]1O[C@H](CO)[C@H](O)[C@H](O)[C@H]1O)[C@@H](O)[C@H](O)CO[C@@H]1O[C@H](CO)C(O[C@@H]2O[C@H](CO)C(O)C(O)[C@H]2O)[C@H](O)[C@H]1NC(C)=O	expected	C28H48N2O21	748.275	6	Metabolite
HMDB0002068	(13Z)-docos-13-enoic acid	Erucic acid	CCCCCCCC\C=C/CCCCCCCCCCCC(O)=O	quantified	C22H42O2	338.318	2	Metabolite
HMDB0002070	2-hydroxy-4-oxopentanedioic acid	4-Hydroxy-2-oxoglutaric acid	OC(CC(=O)C(O)=O)C(O)=O	expected	C5H6O6	162.016	3	Metabolite
HMDB0002071	N-[(2S,3R,4R,5S,6R)-2-{[(2R,3S,4S,5R,6S)-3,5-dihydroxy-2-(hydroxymethyl)-6-{[(2R,3R,4R,5R)-1,2,4,5-tetrahydroxy-6-oxohexan-3-yl]oxy}oxan-4-yl]oxy}-4-{[(3R,4S,5S,6R)-4-{[(2R,3R,4R,5R,6R)-3-acetamido-4,5-dihydroxy-6-(hydroxymethyl)oxan-2-yl]oxy}-5-hydroxy-6-(hydroxymethyl)-3-{[(2S,3S,4R,5S,6S)-3,4,5-trihydroxy-6-methyloxan-2-yl]oxy}oxan-2-yl]oxy}-5-hydroxy-6-(hydroxymethyl)oxan-3-yl]acetamide	O-2-(acetylamino)-2-deoxy-a-D-Gal-(1->3)-O-[6-deoxy-a-L-Gal-(1->2)]-O-b-D-Gal-(1->3)-O-2-(acetylamino)-2-deoxy-b-D-Glc-(1->3)-O-b-D-Gal-(1->4)-D-Glucose	[H][C@@](O[C@@H]1O[C@H](CO)[C@H](O)[C@]([H])(O[C@@H]2O[C@H](CO)[C@@H](O)[C@]([H])(OC3O[C@H](CO)[C@H](O)[C@H](O[C@@]4([H])O[C@H](CO)[C@H](O)[C@H](O)[C@H]4NC(C)=O)[C@H]3O[C@]3([H])O[C@@H](C)[C@@H](O)[C@@H](O)[C@@H]3O)[C@H]2NC(C)=O)[C@H]1O)([C@H](O)CO)[C@H](O)[C@@H](O)C=O	expected	C40H68N2O30	1056.39	8	Metabolite
HMDB0002072	2-(4-methoxyphenyl)acetic acid	4-Methoxyphenylacetic acid	COC1=CC=C(CC(O)=O)C=C1	quantified	C9H10O3	166.063	5	Metabolite
HMDB0002074	2,2-dimethylbutanedioic acid	2,2-Dimethylsuccinic acid	CC(C)(CC(O)=O)C(O)=O	expected	C6H10O4	146.058	2	Metabolite
HMDB0002077	dihydroxychloranium	Chlorite	O[Cl+]O	expected	Cl1H1O2	67.9665	0	Adduct
HMDB0002078	cyanic acid	Cyanate	OC#N	quantified	C1H1N1O1	43.0058	2	Adduct
HMDB0002080	octadec-6-enoic acid	Petroselinic acid	CCCCCCCCCCCC=CCCCCC(O)=O	quantified	C18H34O2	282.256	2	Metabolite
HMDB0002082	(2S)-2-[(1S,2S,5R,7S,9R,10R,11S,14R,15S,16S)-5,9,16-trihydroxy-2,15-dimethyltetracyclo[8.7.0.0?7.0????????,?]heptadecan-14-yl]propanoic acid	Bisnorcholic acid	[H][C@@]1(CC[C@@]2([H])[C@]3([H])[C@H](O)C[C@]4([H])C[C@H](O)CC[C@]4(C)[C@@]3([H])C[C@H](O)[C@]12C)[C@H](C)C(O)=O	expected	C22H36O5	380.256	5	Metabolite
HMDB0002085	4-hydroxy-3,5-dimethoxybenzoic acid	Syringic acid	COC1=CC(=CC(OC)=C1O)C(O)=O	quantified	C9H10O5	198.053	5	Metabolite
HMDB0002086	(10S,12R,13S,17R,23R,24R,25R,30S,35S,36S,40S,41S,42R,46R)-1-{[(2S,3S,4R,5R)-5-(6-amino-9H-purin-9-yl)-3,4-dihydroxyoxolan-2-yl]methyl}-30,35,40-tris(2-carbamoylethyl)-24,36,41-tris(carbamoylmethyl)-46-hydroxy-12-(hydroxymethyl)-5,6,17,23,28,31,31,36,38,41,42-undecamethyl-15,20-dioxo-11,14,16-trioxa-2lambda5,9,19,26,43lambda5,44lambda5,45lambda5-heptaaza-15lambda5-phospha-1-cobaltadodecacyclo[27.1…	Adenosylcobalamin	[C@H]1(C[Co-3]2345[N+]6=C7C(C)=C8N2[C@]([H])([C@H](CC(=O)N)[C@]8(CCC(=O)NC[C@@H](C)OP([O-])(=O)O[C@@H]2[C@@H](CO)O[C@H](N8C=[N+]3C3=CC(C)=C(C)C=C83)[C@@H]2O)C)[C@@]2(C)[C@@](CC(=O)N)([C@H](CCC(=O)N)C(C(C)=C3[N+]4=C(C=C6C([C@@H]7CCC(=O)N)(C)C)[C@@H](CCC(=O)N)[C@@]3(CC(=O)N)C)=[N+]52)C)O[C@@H](N2C3=NC=NC(=C3N=C2)N)[C@H](O)[C@@H]1O	expected	C72Co1H100N18O17P1	1578.66	32.5	Metabolite
HMDB0002087	2-(N,3-dimethylbutanamido)acetic acid	Isovalerylsarcosine	CC(C)CC(=O)N(C)CC(O)=O	expected	C8H15N1O3	173.105	2	Metabolite
HMDB0002088	(9Z)-N-(2-hydroxyethyl)octadec-9-enamide	N-Oleoylethanolamine	CCCCCCCC\C=C/CCCCCCCC(=O)NCCO	quantified	C20H39N1O2	325.298	2	Metabolite
HMDB0002089	(2S)-2-amino-3-{1-[(2R,3R,4S,5R)-3,4-dihydroxy-5-(hydroxymethyl)oxolan-2-yl]-1H-imidazol-4-yl}propanoic acid	N-Ribosylhistidine	N[C@@H](CC1=CN(C=N1)[C@@H]1O[C@H](CO)[C@@H](O)[C@H]1O)C(O)=O	quantified	C11H17N3O6	287.112	5	Metabolite
HMDB0002091	(2S,3S,4S,5R,6S)-3,4,5-trihydroxy-6-[(3-methylbutanoyl)oxy]oxane-2-carboxylic acid	Isovalerylglucuronide	CC(C)CC(=O)O[C@@H]1O[C@@H]([C@@H](O)[C@H](O)[C@H]1O)C(O)=O	expected	C11H18O8	278.1	3	Metabolite
HMDB0002092	2-methylidenebutanedioic acid	Itaconic acid	OC(=O)CC(=C)C(O)=O	detected	C5H6O4	130.027	3	Metabolite
HMDB0002094	(2S,3S,4R,5S,6S)-2-{[(2R,3S,4S,5R,6S)-3,5-dihydroxy-2-(hydroxymethyl)-6-{[(2R,3S,4R,5R)-4,5,6-trihydroxy-2-(hydroxymethyl)oxan-3-yl]oxy}oxan-4-yl]oxy}-6-methyloxane-3,4,5-triol	3-Fucosyllactose	C[C@@H]1O[C@@H](O[C@H]2[C@@H](O)[C@@H](CO)O[C@@H](O[C@H]3[C@H](O)[C@@H](O)C(O)O[C@@H]3CO)[C@@H]2O)[C@@H](O)[C@H](O)[C@@H]1O	quantified	C18H32O15	488.174	3	Metabolite
HMDB0002095	(3S)-3-[(2-carboxyacetyl)oxy]-4-(trimethylazaniumyl)butanoate	Malonylcarnitine	C[N+](C)(C)C[C@H](CC([O-])=O)OC(=O)CC(O)=O	quantified	C10H17N1O6	247.106	3	Metabolite
HMDB0002096	4-(1H-indol-3-yl)butanoic acid	3-Indolebutyric acid	OC(=O)CCCC1=CNC2=C1C=CC=C2	detected	C12H13N1O2	203.095	7	Metabolite
HMDB0002097	4-ethylbenzoic acid	4-Ethylbenzoic acid	CCC1=CC=C(C=C1)C(O)=O	quantified	C9H10O2	150.068	5	Metabolite
HMDB0002098	(2R,3R,4R,5R)-4-{[(2S,3R,4S,5R,6R)-4,5-dihydroxy-6-(hydroxymethyl)-3-{[(2S,3S,4R,5S,6S)-3,4,5-trihydroxy-6-methyloxan-2-yl]oxy}oxan-2-yl]oxy}-2,3,5,6-tetrahydroxyhexanal	2-Fucosyllactose	C[C@@H]1O[C@@H](O[C@H]2[C@H](O[C@H]([C@H](O)CO)[C@H](O)[C@@H](O)C=O)O[C@H](CO)[C@H](O)[C@@H]2O)[C@@H](O)[C@H](O)[C@@H]1O	quantified	C18H32O15	488.174	3	Metabolite
HMDB0002099	N-methyl-7H-purin-6-amine	6-Methyladenine	CNC1=NC=NC2=C1NC=N2	expected	C6H7N5	149.07	6	Metabolite
HMDB0002100	N-(2-hydroxyethyl)hexadecanamide	Palmitoylethanolamide	CCCCCCCCCCCCCCCC(=O)NCCO	quantified	C18H37N1O2	299.282	1	Metabolite
HMDB0002103	(1S,2R,5S,10S,11S,14R,15R)-14-[(2R,6R)-7-hydroxy-6-methylheptan-2-yl]-2,15-dimethyltetracyclo[8.7.0.0^{2,7}.0^{11,15}]heptadec-7-en-5-ol	27-Hydroxycholesterol	[H][C@@]1(CC[C@@]2([H])[C@]3([H])CC=C4C[C@@H](O)CC[C@]4(C)[C@@]3([H])CC[C@]12C)[C@H](C)CCC[C@@H](C)CO	quantified	C27H46O2	402.35	5	Metabolite
HMDB0002104	(2S)-2-amino-5-oxopentanoic acid	L-Glutamic gamma-semialdehyde	N[C@@H](CCC=O)C(O)=O	expected	C5H9N1O3	131.058	2	Metabolite
HMDB0002105	phosphoric acid	Dihydrogen phosphate	OP(O)(O)=O	expected	H3O4P1	97.9769	0	Adduct
HMDB0002107	benzene-1,2-dicarboxylic acid	Phthalic acid	OC(=O)C1=CC=CC=C1C(O)=O	quantified	C8H6O4	166.027	6	Metabolite
HMDB0002108	(2R)-2-amino-3-(methylsulfanyl)propanoic acid	Methylcysteine	CSC[C@H](N)C(O)=O	quantified	C4H9N1O2S1	135.035	1	Metabolite
HMDB0002109	2-amino-6-[(2S)-2,3-dihydroxypropanoyl]-1,4,7,8-tetrahydropteridin-4-one	Hydroxysepiapterin	NC1=NC(=O)C2=C(NCC(=N2)C(=O)[C@@H](O)CO)N1	expected	C9H11N5O4	253.081	7	Metabolite
HMDB0002113	(2R,3S)-3-hydroxypyrrolidine-2-carboxylic acid	3-Hydroxy-L-proline	O[C@H]1CCN[C@H]1C(O)=O	expected	C5H9N1O3	131.058	2	Metabolite
HMDB0002114	(1E,6E)-1,7-bis(4-hydroxyphenyl)hepta-1,6-diene-3,5-dione	Bisdemethoxycurcumin	OC1=CC=C(\C=C\C(=O)CC(=O)\C=C\C2=CC=C(O)C=C2)C=C1	expected	C19H16O4	308.105	12	Metabolite
HMDB0002115	(5Z)-7-[(1S,2R,3R,5R)-3,5-dihydroxy-2-[(1E,3S)-3-hydroxyoct-1-en-1-yl]cyclopentyl]hept-5-enoic acid	8-isoprostaglandin PGF2b	CCCCC[C@H](O)\C=C\[C@H]1[C@H](O)C[C@@H](O)[C@H]1C\C=C/CCCC(O)=O	expected	C20H34O5	354.241	4	Metabolite
HMDB0002117	(9Z)-octadec-9-enamide	Oleamide	CCCCCCCC\C=C/CCCCCCCC(N)=O	quantified	C18H35N1O1	281.272	2	Metabolite
HMDB0002120	2-(ethoxycarbonyl)benzoic acid	Monoethyl phthalate	CCOC(=O)C1=CC=CC=C1C(O)=O	quantified	C10H10O4	194.058	6	Metabolite
HMDB0002121	(1R,8S,10S)-3,4-dihydroxy-11,11-dimethyl-5-(propan-2-yl)-16-oxatetracyclo[6.6.2.0?????????.0?7]hexadeca-2,4,6-trien-15-one	Carnosol	CC(C)C1=CC2=C(C(O)=C1O)[C@@]13CCCC(C)(C)[C@@H]1C[C@@H]2OC3=O	expected	C20H26O4	330.183	8	Metabolite
HMDB0002122	(5Z)-7-[(1R,2R,3R,5S)-3,5-dihydroxy-2-[(1E,3S,5Z)-3-hydroxyocta-1,5-dien-1-yl]cyclopentyl]hept-5-enoic acid	Prostaglandin F3a	CC\C=C/C[C@H](O)\C=C\[C@H]1[C@H](O)C[C@H](O)[C@@H]1C\C=C/CCCC(O)=O	expected	C20H32O5	352.225	5	Metabolite
HMDB0002123	1,3,7-trimethyl-2,3,6,7,8,9-hexahydro-1H-purine-2,6,8-trione	1,3,7-Trimethyluric acid	CN1C(=O)NC2=C1C(=O)N(C)C(=O)N2C	quantified	C8H10N4O3	210.075	6	Metabolite
HMDB0002124	5,7-dihydroxy-2-(4-hydroxyphenyl)-4H-chromen-4-one	Apigenin	OC1=CC=C(C=C1)C1=CC(=O)C2=C(O)C=C(O)C=C2O1	quantified	C15H10O5	270.053	11	Metabolite
HMDB0002126	(1S,2S,5R,7S,9R,10R,11S,14R,15R,16S)-14-[(2R)-5,6-dihydroxyheptan-2-yl]-2,15-dimethyltetracyclo[8.7.0.0?7.0????????,?]heptadecane-5,9,16-triol	27-Nor-5b-cholestane-3a,7a,12a,24,25-pentol	[H][C@@]1(CC[C@@]2([H])[C@]3([H])[C@H](O)C[C@]4([H])C[C@H](O)CC[C@]4(C)[C@@]3([H])C[C@H](O)[C@]12C)[C@H](C)CCC(O)C(C)O	expected	C26H46O5	438.335	4	Metabolite
HMDB0002127	2-hydroxy-3-sulfanylpropanoic acid	3-Mercaptolactic acid	OC(CS)C(O)=O	quantified	C3H6O3S1	122.004	1	Metabolite
HMDB0002128	2,6-diamino-1,4-dihydropyrimidin-4-one	2,4-Diamino-6-hydroxypyrimidine	NC1=CC(=O)N=C(N)N1	expected	C4H6N4O1	126.054	4	Metabolite
HMDB0002130	2-(methoxycarbonyl)benzoic acid	Monomethyl phthalate	COC(=O)C1=CC=CC=C1C(O)=O	quantified	C9H8O4	180.042	6	Metabolite
HMDB0002132	(5Z)-7-[(1S,2R,3R,5S)-3,5-dihydroxy-2-[(1E,3S,5Z)-3-hydroxyocta-1,5-dien-1-yl]cyclopentyl]hept-5-enoic acid	8-iso-PGF3a	CC\C=C/C[C@H](O)\C=C\[C@H]1[C@H](O)C[C@H](O)[C@H]1C\C=C/CCCC(O)=O	expected	C20H32O5	352.225	5	Metabolite
HMDB0002134	1-aminopropan-2-one	Aminoacetone	CC(=O)CN	quantified	C3H7N1O1	73.0528	1	Metabolite
HMDB0002135	4-[(2-amino-2-carboxyethyl)sulfanyl]-2-oxobutanoic acid	S-(3-oxo-3-carboxy-n-propyl)cysteine	NC(CSCCC(=O)C(O)=O)C(O)=O	expected	C7H11N1O5S1	221.036	3	Metabolite
HMDB0002137	{[(2R,3S,4R,5R)-5-(6-amino-9H-purin-9-yl)-2-({[({[(3R)-3-{[2-({2-[(3E)-dec-3-enoylsulfanyl]ethyl}carbamoyl)ethyl]carbamoyl}-3-hydroxy-2,2-dimethylpropoxy](hydroxy)phosphoryl}oxy)(hydroxy)phosphoryl]oxy}methyl)-4-hydroxyoxolan-3-yl]oxy}phosphonic acid	trans-3-Decenoyl-CoA	CCCCCC\C=C\CC(=O)SCCNC(=O)CCNC(=O)[C@H](O)C(C)(C)COP(O)(=O)OP(O)(=O)OC[C@H]1O[C@H]([C@H](O)[C@@H]1OP(O)(O)=O)N1C=NC2=C(N)N=CN=C12	expected	C31H52N7O17P3S1	919.235	11	Metabolite
HMDB0002139	2-[(2E,6E,10E,14E,18E,22E,26Z,30E,34E)-3,7,11,15,19,23,27,31,35,39-decamethyltetraconta-2,6,10,14,18,22,26,30,34,38-decaen-1-yl]-5,6-dimethoxy-3-methylcyclohexa-2,5-diene-1,4-dione	Ubisemiquinone	COC1=C(OC)C(=O)C(C\C=C(/C)CC\C=C(/C)CC\C=C(/C)CC\C=C(/C)CC\C=C(/C)CC\C=C(/C)CC\C=C(\C)CC\C=C(/C)CC\C=C(/C)CCC=C(C)C)=C(C)C1=O	expected	C59H90O4	862.684	15	Metabolite
HMDB0002140	(2R)-2-[(4-{[(2-amino-5-formyl-4-oxo-1,4,5,6,7,8-hexahydropteridin-6-yl)methyl]amino}phenyl)formamido]pentanedioic acid	Pteroyl-D-glutamic acid	NC1=NC(=O)C2=C(NCC(CNC3=CC=C(C=C3)C(=O)N[C@H](CCC(O)=O)C(O)=O)N2C=O)N1	expected	C20H23N7O7	473.166	13	Metabolite
HMDB0002141	2-methyl-2-(methylamino)propanoic acid	N-Methyl-a-aminoisobutyric acid	CNC(C)(C)C(O)=O	expected	C5H11N1O2	117.079	1	Metabolite
HMDB0002142	phosphoric acid	Phosphoric acid	OP(O)(O)=O	quantified	H3O4P1	97.9769	0	Adduct
HMDB0002144	1,3-dimethyl-1,2,3,4-tetrahydropyrimidine-2,4-dione	1,3-Dimethyluracil	CN1C=CC(=O)N(C)C1=O	expected	C6H8N2O2	140.059	4	Metabolite
HMDB0002145	{[(2R,3S,4R,5R)-5-(6-amino-9H-purin-9-yl)-2-({[({[(3R)-3-{[2-({2-[(4E)-dec-4-enoylsulfanyl]ethyl}carbamoyl)ethyl]carbamoyl}-3-hydroxy-2,2-dimethylpropoxy](hydroxy)phosphoryl}oxy)(hydroxy)phosphoryl]oxy}methyl)-4-hydroxyoxolan-3-yl]oxy}phosphonic acid	4-cis-Decenoyl-CoA	CCCCC\C=C\CCC(=O)SCCNC(=O)CCNC(=O)[C@H](O)C(C)(C)COP(O)(=O)OP(O)(=O)OC[C@H]1O[C@H]([C@H](O)[C@@H]1OP(O)(O)=O)N1C=NC2=C(N)N=CN=C12	expected	C31H52N7O17P3S1	919.235	11	Metabolite
HMDB0002148	(2S,6R,11S)-2,11-diamino-6-{N-[(4S)-4-amino-4-carboxybutanoyl]-1-(4-{[(2-amino-5-methyl-4-oxo-1,4,5,6,7,8-hexahydropteridin-6-yl)methyl]amino}phenyl)formamido}-6-({[(4S)-4-amino-4-carboxybutanoyl]oxy}carbonyl)-7-(carboxymethyl)-5,8-dioxododecanedioic acid	5-Methyltetrahydropteroylpentaglutamate	CN1C(CNC2=CC=C(C=C2)C(=O)N(C(=O)CC[C@H](N)C(O)=O)[C@](C(CC(O)=O)C(=O)CC[C@H](N)C(O)=O)(C(=O)CC[C@H](N)C(O)=O)C(=O)OC(=O)CC[C@H](N)C(O)=O)CNC2=C1C(=O)N=C(N)N2	expected	C40H53N11O18	975.357	20	Metabolite
HMDB0002149	3-hydroxy-2H-chromen-2-one	3 Hydroxycoumarin	OC1=CC2=CC=CC=C2OC1=O	expected	C9H6O3	162.032	7	Metabolite
[truncated: 112,593 more rows]
