# Supplementary material for: Metabolite discovery through global annotation of untargeted metabolomics data
Source: Research Square preprint supplement (doi:10.21203/rs.3.rs-142459/v1), 2021-01-22
Supplement: Supplementary file 2 [file 830efaaf4165cc261f9a7d3c.xlsx]

## Sheet:  yeast negative-mode dataset
label	metaGroupId	peak_id	goodPeakCount	medMz	medRt	maxQuality	isotopeLabel	compound	compoundId	formula	expectedRtDiff	ppmDiff	parent	sample
		1		281.248	2.43551	0.834982								9.97471e+08
		2		255.233	2.46972	0.835577								4.60803e+08
		3		253.217	2.48217	0.836559								4.56486e+08
		4		88.0403	13.0122	0.8347								4.4285e+08
		5		143.108	4.21003	0.83782								2.85067e+08
		6		143.108	2.82076	0.829276								2.15649e+08
		7		283.264	2.4324	0.836013								2.70005e+08
		8		146.046	13.4981	0.83841								2.60729e+08
		9		146.046	9.9806	0.835087								4.10941e+06
		10		282.252	2.43551	0.835549								201067121
		11		156.991	13.8907	0.836915								2.01859e+08
		12		121.029	4.21315	0.832376								1.56953e+08
		13		145.062	11.2937	0.737631								248945
		14		173.104	16.7707	0.829713								1.56388e+08
		15		174.088	13.6433	0.837586								1.14817e+08
		16		115.076	4.23504	0.814346								8.70774e+07
		17		115.076	3.01441	0.825202								2.34607e+07
		18		256.236	2.46972	0.836287								8.01866e+07
		19		254.221	2.48217	0.835958								8.08353e+07
		20		205.16	2.57592	0.834501								6.80563e+07
		21		131.083	13.6433	0.83763								7.02662e+07
		22		131.083	16.2423	0.798292								2.16345e+07
		23		131.083	16.7833	0.74463								2.17666e+07
		24		131.084	9.83713	0.744298								67773.1
		25		131.084	9.28824	0.684683								58592.9
		26		284.267	2.43551	0.836785								5.30376e+07
		27		151.061	7.19328	0.786745								5.02193e+07
		28		191.02	14.1822	0.838655								4.6719e+07
		29		118.051	13.0091	0.830246								4.53878e+07
		30		239.06	2.62307	0.808292								2.95986e+07
		31		116.072	11.2098	0.782024								4.03627e+07
		32		165.041	2.56338	0.822604								2.1908e+07
		33		165.041	2.83961	0.822253								2.1908e+07
		34		316.116	13.5802	0.8395								35792213
		35		87.0087	4.20066	0.812106								2.62811e+07
		36		87.0087	3.02078	0.742785								3.91131e+06
		37		87.0087	4.94834	0.639108								1.79359e+07
		38		158.13	14.714	0.819878								9734.35
		39		133.014	13.5422	0.760989								3.01093e+07
		40		144.111	4.21003	0.838548								2.54824e+07
		41		144.111	2.82076	0.827426								1.92427e+07
		42		232.883	13.8437	0.842541								2.17759e+07
		43		194.937	13.8499	0.839704								2.30282e+07
		44		313.079	2.60102	0.819438								13768800
		45		313.081	14.0018	0.845025								202271
		46		445.187	2.77991	0.839522								2.0141e+07
		47		401.13	13.8813	0.840084								1.5319e+07
		48		401.13	14.8218	0.835844								4.46896e+06
		49		311.169	2.08348	0.836508								2.04628e+07
		50		102.056	13.5013	0.837238								2.10479e+07
		51		102.056	12.1664	0.816351								3.99546e+06
		52		306.077	13.4981	0.837283								1.63937e+07
		53		169.123	2.70773	0.832385								1.80452e+07
		54		169.123	4.15988	0.709276								4.78843e+06
		55		128.035	13.495	0.815974								1.81858e+07
		56		128.035	10.3439	0.814665								2.94695e+06
		57		128.035	11.1454	0.77638								8.24498e+06
		58		325.184	2.08028	0.833812								1.6714e+07
		59		299.259	2.63561	0.838712								1.76514e+07
		60		299.259	4.18815	0.82047								4.37419e+06
		61		241.217	2.47906	0.833997								1.77222e+07
		62		283.256	2.43551	0.835418								1.67262e+07
		63		130.087	9.83714	0.780963								1.71104e+07
		64		130.087	9.31435	0.714796								1.37538e+07
		65		89.0436	13.0122	0.835743								1.59573e+07
		66		158.989	13.8907	0.82089								1.52318e+07
		67		132.03	13.5802	0.829778								1.56035e+07
		68		132.03	11.2904	0.836079								6.00972e+06
		69		147.049	13.4981	0.839502								1.48915e+07
		70		164.072	8.83292	0.831178								1.49334e+07
		71		164.072	13.394	0.658591								240290
		72		241.073	4.23504	0.832666								1.05672e+07
		73		241.072	2.37291	0.780983								2.33734e+06
		74		165.055	4.20066	0.833553								1.25987e+07
		75		165.055	2.85223	0.79145								4.23926e+06
		76		349.184	13.6465	0.842054								1.1993e+07
		77		309.28	2.40748	0.838979								11187701
		78		248.08	2.35051	0.83881								1.13061e+07
		79		248.08	3.31242	0.618815								385973
		80		122.033	4.21003	0.832659								1.20759e+07
		81		122.033	2.92844	0.805641								1.45675e+06
		82		206.163	2.57592	0.836558								1.04005e+07
		83		151.04	2.91892	0.826032								1.36133e+07
		84		339.2	2.07071	0.808991								1.05014e+07
		85		269.249	2.45728	0.830107								9.67827e+06
		86		146.065	13.3877	0.838833								1.0827e+07
		87		187.072	11.2937	0.840274								1.01386e+07
		88		330.87	13.8719	0.841588								1.05708e+07
		89		254.968	13.897	0.840573								9.45252e+06
		90		181.072	11.8088	0.841176								1.04495e+07
		91		174.107	16.7675	0.830289								1.05346e+07
		92		611.145	14.1918	0.837825								9.44397e+06
		93		563.505	2.43551	0.851434								7.5476e+06
		94		182.009	13.4193	0.838939								8.98104e+06
		95		157.994	13.8907	0.834183								9.03422e+06
		96		223.028	2.5698	0.809741								6.65324e+06
		97		135.045	4.21003	0.838337								8.31704e+06
		98		135.045	2.87759	0.803623								1.66091e+06
		99		257.176	2.63247	0.836866								8.26091e+06
		100		257.176	4.06748	0.759668								906961
		101		175.072	11.3001	0.838282								8.52594e+06
		102		175.072	12.1697	0.472358								157774
		103		176.038	7.14218	0.784271								9.03201e+06
		104		232.893	13.8593	0.84122								8.15257e+06
		105		127.051	13.3751	0.834542								7960112
		106		131.046	13.4035	0.833628								8.07659e+06
		107		131.046	12.5301	0.818072								160859
		108		175.091	13.637	0.837873								7.83873e+06
		109		297.153	2.09941	0.838915								7.43846e+06
		110		174.077	12.2415	0.839838								7.79477e+06
		111		174.077	11.2421	0.746103								110307
		112		131.071	4.21003	0.829108								6.81126e+06
		113		131.071	2.93797	0.803033								996216
		114		308.795	13.8531	0.843155								6.69088e+06
		115		242.08	13.5865	0.840246								7.13318e+06
		116		242.08	14.353	0.824405								3.60338e+06
		117		242.08	13.0847	0.847431								285216
		118		242.078	9.26866	0.710384								280949
		119		116.08	4.23192	0.81421								5.82846e+06
		120		116.08	3.01441	0.824536								1.53053e+06
		121		245.971	13.5107	0.808241								6.63561e+06
		122		257.24	2.46972	0.834947								5.80737e+06
		123		135.031	7.65917	0.841217								7.01977e+06
		124		225.062	2.83961	0.835431								4.92481e+06
		125		221.06	14.1758	0.821999								6.66613e+06
		126		347.216	16.7738	0.83745								6.56888e+06
		127		267.233	2.45728	0.836282								5.44528e+06
		128		240.063	2.62307	0.821168								1.70054e+06
		129		341.109	14.8251	0.83899								3.50933e+06
		130		341.109	13.8844	0.821272								4.09739e+06
		131		313.238	2.50709	0.837751								5.29019e+06
		132		313.238	4.21628	0.831544								915769
		133		439.076	13.8437	0.844143								2.71924e+06
		134		439.077	14.8251	0.817185								13213.3
		135		292.914	13.8562	0.841488								5.65528e+06
		136		270.839	13.8468	0.842947								5.59561e+06
		137		138.02	13.4161	0.832643								5.58265e+06
		138		446.19	2.78306	0.837275								5.02421e+06
		139		377.237	2.43551	0.83828								4.66822e+06
		140		537.489	2.45728	0.851047								3.97494e+06
		141		104.035	13.4509	0.818755								5.39168e+06
		142		267.073	8.67841	0.776922								5.60774e+06
		143		299.081	2.65131	0.836998								3.42737e+06
		144		606.074	13.7483	0.810076								4.50102e+06
		145		214.048	13.6181	0.841112								5.15218e+06
		146		115.921	13.0122	0.746553								5.10737e+06
		147		115.921	13.3877	0.736121								5.14425e+06
		148		265.181	2.57592	0.833362								4.94965e+06
		149		161.045	13.0594	0.828375								5.09093e+06
		150		91.04	7.05942	0.787004								5.09671e+06
		151		305.069	14.1886	0.838096								4.94931e+06
		152		565.52	2.4324	0.855684								3.42985e+06
		153		279.233	2.4635	0.837719								4.34919e+06
		154		299.201	2.51021	0.832577								2.84495e+06
		155		74.0247	13.337	0.856919								4.94089e+06
		156		74.0246	13.006	0.847899								4.94089e+06
		157		180.066	10.7571	0.803211								5.06686e+06
		158		290.176	2.56339	0.834046								4.2375e+06
		159		290.176	3.81251	0.770873								585516
		160		158.046	11.3258	0.836967								4.57816e+06
		161		158.046	13.3814	0.607692								356947
		162		341.27	2.43862	0.814226								4.30038e+06
		163		130.051	9.03964	0.837635								4.83716e+06
		164		130.051	12.6812	0.786555								241122
		165		164.058	7.7207	0.849895								4.83068e+06
		166		164.056	10.38	0.802058								15871.2
		167		216.099	11.3001	0.838502								4.38083e+06
		168		216.099	12.3364	0.745281								249145
		169		216.099	11.9677	0.611429								249145
		170		233.155	2.53208	0.834567								2.98688e+06
		171		346.056	13.7323	0.766729								4.49378e+06
		172		352.945	13.8875	0.843333								3.56913e+06
		173		294.903	13.9158	0.819144								3.89721e+06
		174		136.017	2.91891	0.831992								2.51241e+06
		175		314.082	2.52283	0.85443								769503
		176		565.048	13.9411	0.787866								3.75795e+06
		177		133.051	7.76614	0.714082								4.34818e+06
		178		317.12	13.577	0.84046								3.90703e+06
		179		160.061	10.7571	0.707082								3.10986e+06
		180		564.508	2.43551	0.850282								2.9295e+06
		181		158.97	13.9095	0.806537								3.74885e+06
		182		312.172	2.08665	0.839512								3.69678e+06
		183		241.056	2.62622	0.857935								2.82597e+06
		184		385.166	2.78306	0.839337								3.34567e+06
		185		151.026	9.01678	0.840754								4.12393e+06
		186		159.102	4.21627	0.8279								3.16774e+06
		187		159.102	2.70773	0.761156								1.55791e+06
		188		159.102	3.77684	0.666883								776570
		189		281.099	2.43862	0.788587								3.76903e+06
		190		166.04	2.57278	0.804566								2.19971e+06
		191		166.04	2.84277	0.824383								2.19971e+06
		192		132.086	13.6402	0.837727								3.84902e+06
		193		132.086	16.2423	0.649825								1.19479e+06
		194		132.086	16.7833	0.640635								1.15741e+06
		195		368.807	13.8437	0.849658								3.12483e+06
		196		172.061	11.2615	0.830943								3.6496e+06
		197		172.061	10.3308	0.827336								1.16451e+06
		198		134.916	13.8499	0.841179								3.55528e+06
		199		170.043	12.9997	0.817168								3.53595e+06
		200		170.043	14.4369	0.790333								43192.3
		201		103.004	13.3877	0.834184								3.47134e+06
		202		175.061	11.9677	0.677368								2.49735e+06
		203		244.067	11.8088	0.784534								3.64211e+06
		204		244.065	9.6022	0.835746								156287
		205		244.067	11.3614	0.745615								3.25181e+06
		206		300.262	2.63246	0.839082								3.44736e+06
		207		300.262	4.18187	0.698237								779485
		208		240.059	2.6168	0.816737								4.35693e+06
		209		315.254	2.47283	0.827748								3.14883e+06
		210		315.254	4.2194	0.804864								1.52267e+06
		211		315.254	2.75162	0.691498								3.14883e+06
		212		310.934	13.897	0.835385								2.85595e+06
		213		188.056	13.2595	0.839039								3.35238e+06
		214		94.0298	13.4161	0.835796								3.44931e+06
		215		142.975	13.8938	0.830957								3.24919e+06
		216		291.131	13.3782	0.851168								3.3816e+06
		217		326.188	2.08348	0.842014								3.18551e+06
		218		88.0121	4.97097	0.654338								647279
		219		306.058	7.59458	0.796289								3.25634e+06
		220		306.058	9.60871	0.845505								171385
		221		88.0667	13.0028	0.836773								3.0696e+06
		222		450.263	7.09439	0.835217								2.74604e+06
		223		450.263	3.06532	0.826366								1.43629e+06
		224		318.207	2.49151	0.832428								2.95507e+06
		225		318.207	3.71849	0.845143								223357
		226		431.191	13.6149	0.844065								2.85658e+06
		227		402.133	13.8813	0.840933								2.13267e+06
		228		402.134	14.8284	0.834918								622268
		229		535.473	2.46661	0.854765								2.59624e+06
		230		321.087	13.6813	0.838495								3.06325e+06
		231		248.582	2.34729	0.841274								2.91498e+06
		232		248.582	3.33492	0.836553								94234.8
		233		145.051	7.1837	0.780988								3.25596e+06
		234		145.098	16.9156	0.816104								3.12273e+06
		235		917.546	2.45417	0.840188								2.53193e+06
		236		132.066	11.3001	0.838723								3.03653e+06
		237		132.066	13.2337	0.765509								8905.24
		238		315.075	2.56977	0.822249								1.70556e+06
		239		242.221	2.48217	0.743526								2.72775e+06
		240		149.009	2.56651	0.782333								1.81932e+06
		241		217.083	13.5834	0.840144								3.06198e+06
		242		217.083	10.2129	0.822524								23671.5
		243		217.083	10.9302	0.813784								20730.9
		244		313.113	13.3719	0.859113								2.95662e+06
		245		313.114	11.5409	0.842711								165158
		246		313.114	12.1468	0.836778								202038
		247		88.0146	13.0249	0.856407								2.96499e+06
		248		214.145	4.20691	0.840468								2.5258e+06
		249		214.145	2.8082	0.82044								1.52762e+06
		250		147.066	5.73642	0.641092								1.27884e+06
		251		243.081	9.06251	0.829657								2.92761e+06
		252		243.083	13.5707	0.839318								451647
		253		243.083	14.3497	0.825825								236156
		254		183.97	13.5044	0.840792								2.78984e+06
		255		170.028	2.8082	0.827833								1.77812e+06
		256		152.064	7.1837	0.747106								2.90932e+06
		257		509.457	2.47283	0.855257								2.25923e+06
		258		281.4	2.43551	0.860465								3.52026e+06
		259		310.283	2.40748	0.831691								2.43313e+06
		260		117.056	4.2194	0.803228								2.22182e+06
		261		117.056	5.275	0.656035								1.59604e+06
		262		265.108	2.78621	0.838893								2.4961e+06
		263		403.149	13.5549	0.843353								2.27795e+06
		264		167.038	2.64817	0.794527								1.53335e+06
		265		315.081	13.495	0.858101								2.2387e+06
		266		184.028	13.006	0.840405								2.58251e+06
		267		288.12	13.4698	0.841617								2.40558e+06
		268		173.057	11.3065	0.83838								2.20524e+06
		269		326.111	7.62687	0.796048								2.47651e+06
		270		326.109	11.2486	0.802173								14455.7
		271		199.07	13.0028	0.842467								2.31819e+06
		272		406.772	13.8499	0.84866								2.33736e+06
		273		662.102	13.9159	0.811421								2.2959e+06
		274		203.083	8.71793	0.83895								2.4388e+06
		275		229.144	2.60417	0.811963								2.2043e+06
		276		478.294	7.09122	0.828811								1.99355e+06
		277		478.294	3.0685	0.826974								1.41416e+06
		278		191.056	13.0248	0.836074								2.22923e+06
		279		191.056	12.0716	0.682313								465940
		280		227.065	13.3877	0.781031								2.29475e+06
		281		227.065	14.4433	0.818542								19152.8
		282		349.205	2.48528	0.840011								1.86331e+06
		283		243.062	7.60103	0.786145								2.28145e+06
		284		243.062	9.61199	0.728499								1.77368e+06
		285		118.023	13.3052	0.839486								2261524
		286		174.101	16.7802	0.809231								2.34466e+06
		287		406.763	13.8468	0.848845								1.95592e+06
		288		340.203	2.06114	0.839681								2.07361e+06
		289		505.988	14.243	0.774402								1.90877e+06
		290		148.048	8.8559	0.824288								29140.9
		291		148.05	9.97735	0.816448								31810.8
		292		428.847	13.8813	0.826686								2.07594e+06
		293		170.127	2.70459	0.834034								2.01006e+06
		294		170.127	4.16618	0.756877								503726
		295		297.28	2.40436	0.821815								1.98368e+06
		296		332.868	13.8719	0.830059								1.98925e+06
		297		117.075	11.2098	0.790331								2.26429e+06
		298		253.345	2.48528	0.795546								1.94782e+06
		299		253.345	3.40881	0.795414								13855.1
		300		259.022	14.1886	0.817327								2.21592e+06
		301		90.0445	13.0154	0.797166								2.11705e+06
		302		111.009	14.179	0.748901								2.13147e+06
		303		160.044	7.59135	0.813938								2.14966e+06
		304		119.054	13.0091	0.833528								2.02151e+06
		305		612.148	14.1758	0.813426								1.97326e+06
		306		307.08	13.495	0.764787								1.62123e+06
		307		351.221	2.46972	0.831612								1.76333e+06
		308		351.221	2.04194	0.725608								592321
		309		73.0295	13.3084	0.636664								2.03163e+06
		310		173.009	13.8687	0.795647								1.48009e+06
		311		152.043	2.92527	0.816521								1.20463e+06
		312		172.098	7.09439	0.829283								1.75126e+06
		313		168.028	13.5076	0.805653								1.91009e+06
		314		156.078	16.7674	0.834797								2.20324e+06
		315		552.33	7.09439	0.826178								1.70221e+06
		316		552.33	3.07169	0.77474								459512
		317		134.047	7.61718	0.817746								2.08773e+06
		318		134.047	5.00973	0.642345								1.58603e+06
		319		134.047	14.9626	0.538375								675817
		320		253.085	3.57618	0.700039								7540.36
		321		272.062	11.5147	0.851327								163864
		322		272.062	8.07893	0.833328								44889.9
		323		272.062	7.74342	0.816444								44889.9
		324		272.062	10.8093	0.802843								22999
		325		272.062	12.4447	0.775622								20061.6
		326		253.144	2.70146	0.827209								1.75376e+06
		327		253.144	4.16618	0.800257								639282
		328		330.861	13.8499	0.849187								1.71426e+06
		329		499.107	13.875	0.805951								1.93987e+06
		330		499.107	14.8153	0.844795								54193
		331		566.524	2.43551	0.851009								1.38977e+06
		332		237.084	13.6591	0.859434								1.89964e+06
		333		237.084	14.1085	0.846239								1.13895e+06
		334		239.202	2.50398	0.83358								1.85536e+06
		335		197.04	14.1982	0.782751								1.03492e+06
		336		272.065	13.755	0.780088								1.87839e+06
		337		818.308	2.51646	0.857								1.53586e+06
		338		818.308	3.41528	0.62687								24304
		339		241.063	2.56979	0.823516								245857
		340		343.285	2.4324	0.808986								1.58264e+06
		341		343.285	4.14366	0.827901								86776.8
		342		426.022	14.005	0.771594								1.74843e+06
		343		213.15	2.83017	0.81662								1.39467e+06
		344		143.054	7.16137	0.817751								49768.4
		345		143.162	3.72172	0.77215								11769.9
		346		115.004	13.5549	0.686416								1.9121e+06
		347		114.98	13.9316	0.786974								1.73478e+06
		348		237.061	13.0815	0.829178								1.8192e+06
		349		269.212	4.21003	0.706134								753711
		350		889.515	2.4884	0.855826								1.48669e+06
		351		157.062	13.6433	0.854251								893249
		352		918.549	2.45417	0.857535								1.48751e+06
		353		330.851	13.8468	0.855564								1.32755e+06
		354		205.035	14.0826	0.805456								1.76279e+06
		355		603.004	13.919	0.839014								1.64825e+06
		356		78.959	14.2046	0.717552								1.65119e+06
		357		242.076	4.23192	0.837633								1.25052e+06
		358		242.076	3.0685	0.822393								34955.1
		359		242.076	3.59547	0.792717								28319.7
		360		404.105	14.8218	0.840659								1.6848e+06
		361		404.104	13.8813	0.813075								852938
		362		404.104	13.4382	0.836499								188998
		363		197.155	2.59788	0.825108								1.56018e+06
		364		197.155	2.18604	0.736603								1.23556e+06
		365		507.442	2.49151	0.857485								1.33179e+06
		366		158.939	13.0752	0.681871								711743
		367		196.935	13.8499	0.840374								1.59811e+06
		368		222.135	11.2195	0.816907								1.48759e+06
		369		166.044	2.57278	0.853335								931009
		370		166.044	2.83647	0.785812								931009
		371		255.107	16.7643	0.80813								1.72868e+06
		372		255.11	11.8542	0.83655								134022
		373		538.492	2.45728	0.855952								1.34056e+06
		374		350.187	13.6465	0.843005								1.47167e+06
		375		891.531	2.47906	0.850597								1.30751e+06
		376		274.014	13.6465	0.858667								1.6211e+06
		377		105.019	11.2969	0.811397								1.55568e+06
		378		252.892	13.919	0.833933								1.36222e+06
		379		256.091	13.6433	0.817007								1.58306e+06
		380		256.091	14.4014	0.825664								25919.7
		381		392.88	13.9064	0.836346								1.20414e+06
		382		318.096	13.5739	0.840252								1.40652e+06
		383		145.99	13.5138	0.822537								1.52261e+06
		384		158.995	13.8907	0.830016								1.66622e+06
		385		379.252	2.4324	0.838592								1.16438e+06
		386		201.981	13.5013	0.830022								1.57351e+06
		387		244.987	13.3877	0.838248								1.58847e+06
		388		215.165	2.62304	0.829831								1.34654e+06
		389		201.981	12.1926	0.806735								10941.9
		390		146.059	13.3908	0.858832								1.46622e+06
		391		494.252	7.09758	0.833583								1.2068e+06
		392		236.861	13.9253	0.819549								1.24136e+06
		393		143.053	4.20691	0.787604								1.68343e+06
		394		143.053	2.82076	0.781276								1.2881e+06
		395		176.056	13.3814	0.651469								1.56172e+06
		396		215.115	13.3782	0.841974								1.4072e+06
		397		496.178	13.8875	0.827534								781333
		398		496.178	14.8251	0.839013								86024.8
		399		224.028	2.61681	0.807991								921805
		400		303.233	2.49151	0.801144								1.12623e+06
		401		145.112	4.21003	0.834609								1.17212e+06
		402		145.112	2.81762	0.814342								899021
		403		304.061	13.4761	0.857583								1.31455e+06
		404		304.061	13.0217	0.82402								963725
		405		304.061	12.2252	0.804897								44992.5
		406		511.473	2.46661	0.855329								1.03733e+06
		407		279.039	7.59457	0.84152								1.37819e+06
		408		250.145	2.05157	0.802595								1.00433e+06
		409		250.145	2.60732	0.707476								147923
		410		275.125	14.0115	0.836645								1.3434e+06
		411		249.055	13.394	0.83713								1.20201e+06
		412		157.05	10.1867	0.685751								856010
		413		536.476	2.47283	0.855693								1.0591e+06
		414		165.075	8.83292	0.813522								1.48831e+06
		415		235.17	2.52271	0.829868								1.27602e+06
		416		256.966	13.8938	0.807111								1.28092e+06
		417		131.035	13.0815	0.827998								1.33886e+06
		418		196.073	11.284	0.839302								1.34217e+06
		419		327.254	2.4324	0.826626								1.30892e+06
		420		228.049	13.5044	0.80432								1.30788e+06
		421		228.049	14.4401	0.819018								11182.9
		422		281.397	2.44484	0.859677								2.97329e+06
		423		203.129	4.20378	0.828215								1.27495e+06
		424		203.129	2.81762	0.790162								961301
		425		298.156	2.10261	0.822114								1.26852e+06
		426		314.242	2.50398	0.829822								978698
		427		314.242	4.21315	0.847204								172247
		428		314.242	3.69577	0.778942								24267.2
		429		145.014	12.862	0.798928								1.33223e+06
		430		284.259	2.43551	0.763735								834998
		431		241.144	2.18604	0.805695								1.19549e+06
		432		231.098	13.4129	0.838458								1.25418e+06
		433		444.718	13.8468	0.855213								1.19308e+06
		434		175.085	13.637	0.839412								1.29683e+06
		435		88.0283	13.0091	0.791545								360892
		436		310.793	13.8499	0.854968								1.10963e+06
		437		166.059	4.20378	0.833293								1.19407e+06
		438		166.059	2.86173	0.805607								386265
		439		168.043	14.3529	0.829434								1.24047e+06
		440		168.043	13.5833	0.773431								83048.4
		441		174.043	6.00972	0.692793								1.33433e+06
		442		314.078	2.57291	0.826484								2.47339e+06
		443		134.018	13.5359	0.773202								1.32335e+06
		444		258.179	2.63246	0.838156								1.18045e+06
		445		258.179	4.04824	0.843849								125426
		446		110.985	13.7004	0.832356								1.20274e+06
		447		88.0136	13.0216	0.857368								3.10409e+06
		448		137.996	13.9253	0.787146								1.36255e+06
		449		137.061	3.03353	0.82623								1.12408e+06
		450		225.008	4.21627	0.824844								603359
		451		225.008	3.07168	0.761223								514281
		452		200.997	13.3908	0.783266								1.22654e+06
		453		99.0088	13.3052	0.82239								1.14095e+06
		454		407.237	16.7674	0.855641								1.11493e+06
		455		289.115	14.1918	0.840124								1.06503e+06
		456		554.31	3.0685	0.833048								1.05447e+06
		457		554.31	7.09439	0.808677								718070
		458		644.03	13.7681	0.849786								906314
		459		302.533	13.7483	0.857284								1.13033e+06
		460		293.099	13.4981	0.855733								1.03534e+06
		461		229.156	7.08487	0.833804								980393
		462		182.987	13.3971	0.834783								1.13794e+06
		463		890.518	2.49151	0.8551								862750
		464		305.57	14.1918	0.838226								1.07216e+06
		465		338.067	13.9762	0.834103								1.06257e+06
		466		287.223	4.2194	0.819296								1.06075e+06
		467		131.091	9.83063	0.716415								1.16202e+06
		468		131.091	9.31436	0.635229								908273
		469		234.891	13.8531	0.841702								1.02464e+06
		470		93.0345	4.21315	0.791815								907390
		471		299.026	2.95388	0.851722								733971
		472		299.026	2.65444	0.847296								733971
		473		281.75	2.4324	0.856242								739996
		474		145.117	13.3814	0.794338								1.09276e+06
		475		504.73	13.8468	0.849881								837481
		476		342.273	2.4324	0.789411								893240
		477		243.16	2.62933	0.826039								1.05639e+06
		478		243.16	8.58938	0.840653								205580
		479		243.16	4.08374	0.83019								137917
		480		510.461	2.47594	0.8552								816428
		481		121.072	2.92209	0.796171								117767
		482		178.973	14.3949	0.732973								979361
		483		212.957	13.9222	0.816345								1.00019e+06
		484		258.038	13.6781	0.841549								1.02323e+06
		485		258.038	14.1375	0.830289								252799
		486		329.085	7.63333	0.778151								1.07749e+06
		487		329.087	13.3782	0.824655								48722.6
		488		88.1281	13.006	0.795428								785947
		489		215.033	6.82469	0.694679								33334.2
		490		129.019	6.50697	0.705961								618592
		491		580.362	3.07168	0.850504								339585
		492		580.362	7.09758	0.826165								951170
		493		580.362	3.61168	0.755554								7946.64
		494		190.054	7.10395	0.829819								984652
		495		129.039	11.1389	0.622675								454586
		496		146.082	9.90883	0.85812								1.11623e+06
		497		156.928	13.8876	0.8128								1.07443e+06
		498		212.013	13.6496	0.824135								1.06683e+06
		499		604.07	14.1085	0.840379								991448
		500		215.96	13.5013	0.856391								964724
		501		187.109	12.9462	0.809708								1.06115e+06
		502		187.109	8.63557	0.822828								146421
		503		187.109	9.51385	0.659215								305404
		504		569.273	7.09122	0.834381								898507
		505		356.103	5.01296	0.743991								889896
		506		356.103	14.9724	0.76334								387533
		507		249.078	2.35051	0.83824								934056
		508		249.078	3.34455	0.831109								29590.9
		509		362.051	14.0826	0.834063								993258
		510		554.123	14.1918	0.813648								955916
		511		110.976	8.18372	0.834403								112969
		512		296.882	13.9285	0.816512								804508
		513		187.965	12.9934	0.825894								1.00433e+06
		514		268.236	2.45417	0.834387								898231
		515		255.197	2.62304	0.833052								909229
		516		522.283	7.09122	0.836346								900086
		517		919.558	2.45417	0.854243								587181
		518		145.114	4.21315	0.83925								945403
		519		145.114	2.82076	0.821658								706448
		520		256.192	2.62304	0.834107								821503
		521		256.192	3.96158	0.84103								141375
		522		243.196	4.22566	0.822518								821746
		523		100.934	13.0091	0.780937								921161
		524		100.934	11.3065	0.786931								27257.9
		525		100.934	8.82309	0.790389								5957.81
		526		323.029	13.9285	0.799185								910034
		527		408.911	13.897	0.85462								720254
		528		201.113	2.30548	0.73829								297096
		529		193.108	4.35008	0.831835								632048
		530		313.165	2.08346	0.839346								851633
		531		256.947	13.9127	0.816737								1.07371e+06
		532		234.879	13.8468	0.849141								2.19053e+06
		533		521.327	16.7738	0.830825								947024
		534		280.236	2.46351	0.791311								788198
		535		327.291	2.54147	0.838117								801629
		536		301.217	2.46973	0.769179								787133
		537		296.901	13.9158	0.828002								783405
		538		539.505	2.45417	0.853481								704978
		539		184.025	12.9206	0.840013								882033
		540		255.088	2.33446	0.834822								830502
		541		103.059	13.495	0.835025								930255
		542		103.059	12.186	0.838325								180282
		543		387.097	2.5634	0.855631								526519
		544		238.068	11.3001	0.839521								906895
		545		234.881	13.8468	0.848923								1.06058e+06
		546		308.072	13.5013	0.839439								663617
		547		255.362	2.47283	0.786434								1.82147e+06
		548		296.1	7.88323	0.807546								957382
		549		147.043	13.495	0.841197								952559
		550		167.044	13.3909	0.837819								915776
		551		167.044	14.3949	0.83355								13906.3
		552		283.415	2.43551	0.858049								1.00723e+06
		553		521.137	2.51334	0.853247								400149
		554		524.111	2.52896	0.854387								500930
		555		99.9258	13.0217	0.666758								899215
		556		253.987	13.4446	0.772914								672531
		557		253.987	14.1053	0.783264								170302
		558		253.987	14.3077	0.761948								117713
		559		203.029	13.006	0.814747								893176
		560		291.18	2.56651	0.855577								709177
		561		291.18	3.79306	0.84046								103857
		562		146.966	3.20632	0.849359								483933
		563		386.169	2.78306	0.837861								740166
		564		300.205	2.50397	0.848251								593551
		565		288.86	13.8781	0.812005								831851
		566		607.078	13.7483	0.85674								747821
		567		301.157	7.10076	0.830392								788584
		568		266.184	2.57591	0.857019								784697
		569		152.047	13.5644	0.693914								454797
		570		194.946	14.1343	0.776689								864153
		571		88.0171	13.0122	0.851778								124788
		572		892.534	2.47594	0.854209								715243
		573		176.035	5.8568	0.657723								393178
		574		188.076	11.2904	0.840883								789632
		575		354.943	13.8844	0.854439								701865
		576		225.025	2.57291	0.732496								599258
		577		100.934	13.3782	0.78448								921366
		578		159.03	13.3751	0.783186								823760
		579		537.053	13.8499	0.854568								741534
		580		174.041	13.3751	0.694397								818090
		581		371.066	2.63873	0.849633								393813
		582		173.032	16.7706	0.854333								793395
		583		223.134	2.68578	0.851341								456115
		584		140.035	12.9174	0.732922								840604
		585		429.155	2.77991	0.841038								713518
		586		453.078	13.9033	0.855945								469650
		587		582.341	3.06851	0.836654								779962
		588		582.341	7.10076	0.849097								383649
		589		582.341	3.5697	0.806548								42259.7
		590		198.075	11.2002	0.820357								833124
		591		198.075	9.29804	0.819337								40339.2
		592		198.075	9.84041	0.7889								19720.7
		593		87.9523	13.0091	0.815298								791190
		594		319.043	14.1726	0.801042								792141
		595		319.211	2.49463	0.85444								596854
		596		319.211	3.70874	0.831898								46405.4
		597		402.995	14.1085	0.790125								822943
		598		214.022	9.03312	0.805696								849416
		599		179.035	2.84276	0.838996								136892
		600		348.219	16.7738	0.825452								776671
		601		496.268	7.09439	0.833405								730162
		602		155.01	8.56959	0.854719								833875
		603		282.1	2.4324	0.856812								682237
		604		123.036	4.21315	0.8287								369423
		605		354.924	13.9032	0.835095								645010
		606		371.166	13.6433	0.854378								732143
		607		211.082	9.89905	0.817326								790811
		608		211.084	13.1624	0.798408								216117
		609		211.084	12.4414	0.623251								81239
		610		386.164	2.08345	0.845047								26787
		611		282.084	9.71007	0.819759								774846
		612		259.191	4.20378	0.836471								573132
		613		237.186	2.51958	0.834739								653841
		614		142.051	7.16772	0.711163								793087
		615		234.158	2.53209	0.851642								461937
		616		294.915	13.8531	0.854083								650032
		617		178.087	2.89031	0.831907								477072
		618		447.193	2.77362	0.837808								613779
		619		497.167	2.34729	0.856326								666481
		620		497.167	3.3285	0.834537								48070.1
		621		370.805	13.8437	0.817209								588791
		622		158.082	7.0944	0.77249								664494
		623		450.922	13.8875	0.853515								589100
		624		316.257	2.47594	0.807651								613833
		625		316.257	4.21315	0.814054								263578
		626		207.166	2.56966	0.821129								682655
		627		259.091	13.0248	0.855047								756716
		628		116.057	11.242	0.84425								24070.1
		629		446.182	2.80506	0.818828								631743
		630		85.0659	7.07852	0.820527								589546
		631		85.0658	4.19753	0.821923								73549.9
		632		136.048	4.20691	0.833999								681636
		633		136.048	2.87759	0.847389								137484
		634		176.092	13.6402	0.803507								714003
		635		176.093	11.2292	0.823289								42812.1
		636		176.093	9.30129	0.804415								26875.4
		637		176.093	9.84367	0.736846								14422.4
		638		183.013	13.4161	0.841052								662042
		639		72.0091	13.006	0.74513								601231
		640		451.266	7.09758	0.853638								559425
		641		451.266	3.06532	0.850247								308299
		642		504.749	13.8593	0.854519								643268
		643		312.291	2.53209	0.853826								590969
		644		132.923	13.006	0.738208								744969
		645		132.923	13.394	0.673385								753405
		646		229.181	4.22879	0.824364								381078
		647		229.181	2.43862	0.735989								510685
		648		300.084	2.64817	0.853726								217065
		649		217.048	11.8056	0.8547								699899
		650		217.048	11.3711	0.847434								593507
		651		327.18	2.08346	0.825175								692547
		652		598.13	2.51958	0.855518								412890
		653		189.077	4.09964	0.710645								731995
		654		115.059	11.9742	0.813402								742914
		655		295.264	2.41994	0.822755								554800
		656		280.746	2.45106	0.855837								542734
		657		760.08	13.9064	0.838044								532584
		658		120.987	4.20691	0.822714								1.00854e+06
		659		120.987	2.93479	0.787424								118066
		660		171.006	13.5865	0.832527								695049
		661		241.039	2.87759	0.818288								366164
		662		160.04	7.14538	0.692803								637112
		663		96.0455	12.9271	0.840355								679275
		664		342.112	14.8284	0.840054								424194
		665		342.112	13.8813	0.822644								481483
		666		114.02	2.75164	0.592552								584626
		667		597.304	7.09122	0.837431								575092
		668		328.881	13.8562	0.801594								672474
		669		159.992	13.8656	0.856162								618432
		670		133.992	2.26994	0.839838								636918
		671		133.992	2.62933	0.76577								636918
		672		408.77	13.8531	0.854708								632715
		673		599.32	7.09122	0.835812								551217
		674		440.08	13.8468	0.853588								332134
		675		253.091	2.48528	0.852696								1.49915e+06
		676		101.072	13.3845	0.838716								664505
		677		202.12	14.714	0.808482								644805
		678		202.12	14.2398	0.669723								353781
		679		148.044	10.0754	0.856855								685842
		680		542.685	13.8468	0.850399								530480
		681		246.971	13.5107	0.854862								653177
		682		133.033	13.577	0.853958								666642
		683		133.034	11.2872	0.848321								257001
		684		201.099	13.4446	0.839508								574054
		685		302.101	13.5833	0.841366								659708
		686		193.026	14.1822	0.852757								87281.5
		687		207.051	4.94512	0.798361								676288
		688		207.051	12.2317	0.832733								95765.6
		689		419.284	2.4324	0.855239								479141
		690		512.476	2.46972	0.852896								397667
		691		182.075	11.8056	0.803098								686330
		692		182.075	11.3614	0.735752								512332
		693		226.061	2.83647	0.833062								466902
		694		302.045	13.0216	0.855163								590706
		695		302.045	13.5138	0.842808								154781
		696		115.116	3.01122	0.815492								155099
		697		115.116	4.22566	0.76359								560377
		698		482.674	13.8499	0.85307								551071
		699		175.111	16.7675	0.852835								261411
		700		299.223	2.47283	0.698591								599608
		701		241.574	2.37291	0.856349								525673
		702		241.574	3.3799	0.835055								22701.5
		703		430.826	13.8844	0.85449								575242
		704		452.901	13.8875	0.854242								542375
		705		447.064	2.61989	0.848935								340380
		706		312.933	13.8875	0.855213								546563
		707		445.053	14.0115	0.834953								521605
		708		508.445	2.48217	0.853338								444739
		709		176.076	11.3001	0.837563								567056
		710		176.076	12.1958	0.62319								7722.94
		711		200.054	13.0028	0.809598								605700
		712		386.837	13.8844	0.854589								594053
		713		486.158	12.9934	0.819685								557260
		714		196.916	13.8405	0.854142								584695
		715		613.14	14.179	0.827282								605479
		716		389.144	13.6275	0.854702								515230
		717		247.093	11.2744	0.853888								605396
		718		193.024	14.179	0.767467								662003
		719		285.243	2.34088	0.838436								588493
		720		285.243	2.65443	0.789596								588493
		721		285.243	4.20378	0.750249								228361
		722		255.971	13.8907	0.798283								553251
		723		116.921	13.0028	0.759661								576528
		724		116.921	11.3323	0.808808								21517.5
		725		116.921	13.4035	0.697114								561496
		726		819.311	2.53208	0.854912								527656
		727		98.9491	1.99035	0.83001								629577
		728		463.219	2.07708	0.803596								39765.6
		729		175.08	12.235	0.840869								610063
		730		111.02	7.59135	0.69903								690876
		731		111.02	8.55634	0.696148								663997
		732		141.092	4.22566	0.801615								548349
		733		141.092	2.8177	0.713764								271654
		734		175.108	16.7865	0.823891								633848
		735		406.002	13.4981	0.85478								470092
		736		430.845	13.8813	0.854271								584687
		737		314.097	13.4509	0.85492								484117
		738		408.76	13.8499	0.854058								457334
		739		174.015	13.6402	0.807632								611533
		740		452.278	7.09439	0.853224								512116
		741		452.278	3.06532	0.851002								307183
		742		452.278	3.64077	0.828154								8819.09
		743		566.051	13.9285	0.807788								566815
		744		102.02	9.98714	0.83581								554165
		745		322.045	14.0244	0.832232								550981
		746		268.077	8.66852	0.794967								602953
		747		200.056	7.59782	0.841809								24622.5
		748		303.083	7.59457	0.833721								573048
		749		516.204	13.8875	0.853649								297717
		750		174.161	13.6402	0.854038								610006
		751		168.03	2.61046	0.815435								388879
		752		325.275	2.43551	0.790158								498769
		753		143.29	4.20378	0.853028								343372
		754		143.29	2.81448	0.838711								211454
		755		255.666	2.46972	0.8549								347798
		756		649.101	14.1631	0.797522								532499
		757		193.072	4.4985	0.687248								589339
		758		487.309	2.43551	0.854927								474034
		759		274.104	13.6496	0.781126								546190
		760		189.113	4.21003	0.765345								455408
		761		448.174	2.79249	0.839264								459672
		762		195.086	16.7738	0.793516								575037
		763		195.087	7.48774	0.692333								423019
		764		195.087	8.05934	0.651093								126956
		765		159.077	13.2696	0.852846								309470
		766		159.077	11.3097	0.835347								569183
		767		159.077	13.6623	0.848197								319102
		768		159.077	12.8489	0.744482								274885
		769		332.174	2.06114	0.838445								461468
		770		96.8585	13.8593	0.855411								433936
		771		277.007	7.04983	0.671803								545178
		772		284.223	2.53833	0.854851								467278
		773		284.223	3.79956	0.833154								48499.1
		774		672.149	2.50709	0.854003								285315
		775		337.311	2.38242	0.852673								420778
		776		398.124	13.0342	0.724114								506457
		777		506.728	13.8468	0.854561								465642
		778		273.171	4.22879	0.801875								440531
		779		272.093	2.60417	0.855098								513042
		780		177.038	7.12623	0.839977								85433.1
		781		219.175	2.58534	0.846925								337990
		782		300.193	7.09758	0.834151								463998
		783		403.134	13.8813	0.85506								387852
		784		403.135	14.8284	0.848296								104782
		785		553.334	7.09122	0.833437								460725
		786		160.025	13.4541	0.830651								442586
		787		479.297	7.09122	0.841514								460345
		788		274.104	11.6589	0.813511								54529.4
		789		123.034	4.21315	0.828235								663645
		790		263.07	13.4635	0.807977								449358
		791		128.033	13.006	0.854539								501397
		792		714.508	4.23819	0.830594								485848
		793		714.508	3.0399	0.814688								367675
		794		173.137	16.7738	0.849475								80157.6
		795		192.957	13.9412	0.737019								567561
		796		383.114	13.4035	0.776861								476450
		797		88.0486	13.0154	0.854051								602838
		798		466.774	13.8468	0.851031								393979
		799		173.093	11.3033	0.834176								513438
		800		173.093	13.6023	0.828952								297377
		801		173.093	11.9029	0.829902								166828
		802		173.093	13.0851	0.803241								55628.5
		803		224.032	2.57605	0.785827								325676
		804		663.105	13.919	0.855589								508765
		805		251.202	2.50398	0.816643								492157
		806		528.286	7.09758	0.85584								404210
		807		208.057	13.3751	0.855019								524528
		808		280.634	2.43862	0.854294								369519
		809		217.976	13.0216	0.854189								508136
		810		240.205	2.50086	0.853575								345055
		811		427.322	2.75161	0.855082								468335
		812		271.081	16.7674	0.855476								452091
		813		202.083	11.342	0.840374								447239
		814		202.083	13.0752	0.846095								118082
		815		202.083	11.8575	0.832097								40670.1
		816		202.083	12.77	0.772817								118082
		817		490.857	13.9001	0.854329								393628
		818		302.066	7.62687	0.784953								490039
		819		206.082	3.04308	0.801143								288985
		820		206.082	5.782	0.749092								437424
		821		206.082	4.23192	0.711433								412671
		822		226.075	13.006	0.841619								483527
		823		315.058	2.71087	0.850421								263106
		824		175.051	5.90886	0.707927								523527
		825		479.297	3.07168	0.83441								328276
		826		331.174	13.2466	0.811117								33414.5
		827		334.838	13.9158	0.828698								458711
		828		188.093	13.0279	0.620817								57216.5
		829		350.869	13.9064	0.790382								385736
		830		540.053	13.9064	0.799134								405030
		831		321.141	13.5928	0.853675								492282
		832		369.198	16.7738	0.85437								506421
		833		182.057	11.2937	0.839486								418196
		834		137.024	2.40437	0.754303								490359
		835		190.965	7.19329	0.690016								452385
		836		253.089	3.43132	0.81091								13030.3
		837		222.063	14.1599	0.821244								484572
		838		127.017	7.01785	0.854752								516405
		839		482.961	14.3691	0.775912								451147
		840		333.059	14.0018	0.849329								467368
		841		117.081	4.23818	0.804492								351189
		842		287.052	11.3065	0.841493								445295
		843		175.036	13.6339	0.85412								474760
		844		153.065	7.19649	0.766115								771497
		845		200.129	4.22879	0.827176								407814
		846		200.129	2.91256	0.845187								152484
		847		200.129	3.81256	0.772985								325506
		848		132.078	13.5928	0.851347								308076
		849		318.12	13.5802	0.850205								471516
		850		553.334	3.07487	0.844199								124224
		851		195.94	13.8468	0.840453								456024
		852		305.249	2.42928	0.855653								360444
		853		128.055	13.3877	0.854506								442165
		854		468.782	13.8844	0.854091								361327
		855		269.089	13.5897	0.784926								412932
		856		446.716	13.8499	0.854128								392274
		857		234.064	2.38558	0.834621								403284
		858		216.944	13.3052	0.849158								434759
		859		281.863	2.43551	0.85377								361705
		860		257.078	5.28795	0.809098								473278
		861		257.078	7.95815	0.803877								24159.8
		862		301.077	2.6513	0.854182								301331
		863		575.01	13.8562	0.85397								425958
		864		243.027	7.0562	0.685575								411985
		865		407.221	7.10076	0.838072								432623
		866		261.073	13.394	0.817293								428195
		867		261.073	14.0244	0.83836								74386.4
		868		245.078	7.84745	0.812378								423742
		869		245.077	9.06251	0.585991								111860
		870		341.196	2.06752	0.854671								404748
		871		347.059	13.7291	0.854658								446191
		872		298.283	2.41372	0.856398								402727
		873		139.023	13.4193	0.745557								365153
		874		209.155	2.69832	0.819711								403910
		875		209.155	4.16932	0.840999								146954
		876		432.195	13.6086	0.853103								383370
		877		253.646	2.48217	0.854075								317458
		878		353.172	2.56652	0.853498								346324
		879		177.088	12.9997	0.854472								425343
		880		311.097	2.96343	0.844003								121714
		881		311.097	14.195	0.823								26522.5
		882		389.133	13.577	0.853939								411734
		883		279.094	11.3097	0.842853								411161
		884		196.07	13.6465	0.855773								373393
		885		196.07	14.3787	0.818176								12091.9
		886		191.104	6.16911	0.78716								463913
		887		119.023	13.3148	0.855084								436292
		888		243.051	13.3719	0.844197								42625.3
		889		280.75	2.43551	0.854911								250353
		890		331.874	13.8656	0.853951								371715
		891		427.322	4.22253	0.85408								383941
		892		230.024	13.6496	0.85551								401460
		893		230.022	14.3238	0.837762								18715.7
		894		238.994	13.9316	0.732315								377752
		895		238.994	14.4078	0.637155								225785
		896		331.072	13.4887	0.856386								399362
		897		296.074	9.46805	0.855171								450297
		898		330.061	13.5108	0.85041								32915.7
		899		307.264	2.40748	0.853779								387661
		900		528.07	2.73907	0.854556								194936
		901		208.065	13.0028	0.814149								373548
		902		227.165	2.76733	0.70937								376549
		903		316.192	2.51645	0.855202								326396
		904		316.192	3.74444	0.827975								28326.6
		905		242.06	2.61374	0.844512								158316
		906		242.059	5.93488	0.839805								11109.2
		907		163.04	12.4184	0.834253								460949
		908		266.111	2.77677	0.854792								349743
		909		213.086	16.2456	0.855933								432913
		910		329.158	13.7163	0.852935								359031
		911		87.9326	13.006	0.855387								253477
		912		281.317	2.44173	0.852807								317214
		913		330.069	8.66852	0.803644								441434
		914		330.068	11.4199	0.827004								7868.97
		915		394.878	13.9033	0.853371								328824
		916		315.082	2.51667	0.854027								188021
		917		112.023	5.3268	0.854544								440265
		918		112.023	8.51999	0.820328								30361.6
		919		112.023	7.58812	0.805879								29424
		920		213.088	13.4224	0.814944								20416.6
		921		213.087	9.90557	0.828173								8236.45
		922		271.037	13.3909	0.848674								32237
		923		146.233	13.5107	0.852926								305537
		924		237.15	2.36971	0.853077								341338
		925		237.15	2.68264	0.844445								341338
		926		359.048	2.65758	0.854439								454282
		927		259.016	14.1503	0.853721								344292
		928		317.225	2.4324	0.85561								300082
		929		226.065	2.83332	0.835673								279712
		930		415.307	2.66698	0.855555								365383
		931		281.036	7.59458	0.806868								413757
		932		380.033	2.93479	0.852121								255773
		933		174.947	14.2174	0.60781								387860
		934		686.477	4.24447	0.826732								360226
		935		686.477	3.0399	0.816968								330075
		936		121.072	4.21627	0.787184								1.00492e+06
		937		171.114	4.23818	0.852673								291781
		938		171.114	3.18379	0.708185								51564.5
		939		281.296	2.42928	0.838839								317693
		940		306.067	14.1918	0.809111								391349
		941		790.524	3.07168	0.813207								355459
		942		790.524	4.41129	0.796004								370929
		943		450.093	2.56027	0.853059								275103
		944		249.083	3.36384	0.813719								10006
		945		227.059	2.83647	0.836654								306827
		946		178.034	7.15494	0.855239								400289
		947		324.254	2.44484	0.855123								342730
		948		233.883	13.8437	0.852725								303788
		949		296.082	5.00004	0.790932								365084
		950		316.075	2.56969	0.853405								221702
		951		239.095	4.20378	0.851575								314241
		952		239.096	2.81762	0.820907								259470
		953		241.181	2.67951	0.743479								357195
		954		920.564	2.45106	0.852827								297376
		955		308.074	7.84745	0.838304								366295
		956		461.294	2.47283	0.850906								218236
		957		257.212	4.22253	0.773513								247303
		958		257.212	2.75161	0.748266								362813
		959		313.094	3.06215	0.795128								121724
		960		573.219	13.5802	0.853026								317701
		961		136.034	7.66887	0.81955								385107
		962		136.035	8.66523	0.812301								9530.92
		963		217.108	7.09758	0.7701								213393
		964		207.012	2.32803	0.855586								308779
		965		266.089	7.61718	0.799765								371901
		966		266.089	8.64546	0.822896								16625.5
		967		365.231	2.44795	0.855226								376054
		968		244.166	13.4351	0.854777								359446
		969		244.166	13.755	0.832946								359446
		970		350.209	2.48217	0.8514								278465
		971		350.208	2.08667	0.824913								394329
		972		554.346	7.09439	0.854199								303952
		973		148.007	11.2583	0.841191								321068
		974		148.007	10.3767	0.813002								16773.7
		975		389.077	2.62931	0.854719								218360
		976		425.123	13.0154	0.717709								377325
		977		156.066	12.2415	0.727774								378494
		978		234.888	13.8499	0.854657								333011
		979		252.788	2.46972	0.847221								229806
		980		337.201	2.50087	0.850054								91358.1
		981		227.108	2.7328	0.85503								325342
		982		89.0373	13.0154	0.667041								2.36085e+06
		983		279.004	7.04983	0.663122								372566
		984		249.087	3.96799	0.816493								5389.59
		985		404.152	13.5517	0.854293								306439
		986		156.781	13.8719	0.853267								228561
		987		597.084	13.8781	0.853856								383968
		988		132.075	4.20065	0.774369								416061
		989		132.075	2.94434	0.812722								56170.9
		990		142.925	4.20378	0.853794								332953
		991		244.014	13.4918	0.854229								357951
		992		454.051	2.79562	0.853845								203083
		993		381.203	2.48528	0.855038								270766
		994		381.203	3.73794	0.823949								11125.4
		995		332.849	13.8437	0.855899								333659
		996		444.033	13.7681	0.826767								290717
		997		246.029	13.006	0.853382								361056
		998		89.0464	13.0122	0.855682								377986
		999		281.196	2.4324	0.854696								365154
		1000		207.03	11.8543	0.840697								346439
		1001		95.9523	13.8405	0.835554								162316
		1002		95.9523	7.2157	0.74388								375816
		1003		88.0326	13.0342	0.855104								458311
		1004		227.96	13.495	0.854563								348858
		1005		227.96	10.8452	0.820153								76150
		1006		227.96	11.1421	0.726654								76150
		1007		250.068	11.2937	0.854514								343752
		1008		489.325	2.42928	0.854709								282811
		1009		334.202	2.68264	0.852022								302708
		1010		334.202	4.19752	0.848369								205690
		1011		121.016	4.2069	0.851431								110415
		1012		132.049	13.4035	0.854215								346589
		1013		132.049	11.2453	0.820971								22404.3
		1014		88.0633	13.006	0.852028								104846
		1015		212.015	7.11986	0.834994								333310
		1016		212.016	6.12353	0.496193								14904.4
		1017		126.056	7.19649	0.704207								368162
		1018		216.919	13.8499	0.785239								351542
		1019		302.073	13.2699	0.797924								293172
		1020		302.073	11.9191	0.753599								357628
		1021		302.073	12.7897	0.710838								341114
		1022		300.08	2.65131	0.853222								446694
		1023		207.077	8.94792	0.85449								369073
		1024		132.049	7.1901	0.832084								44391.9
		1025		243.179	5.26853	0.704957								104243
		1026		253.131	11.255	0.839283								334381
		1027		254.799	2.46972	0.854365								245422
		1028		280.997	11.8153	0.77737								357568
		1029		280.997	11.3646	0.765542								303188
		1030		246.974	13.5107	0.853442								305337
		1031		374.212	4.22253	0.852131								272414
		1032		344.289	4.09643	0.780904								16123
		1033		180.921	13.8499	0.853718								324283
		1034		203.067	13.7227	0.853991								339709
		1035		203.067	11.3001	0.848012								216719
		1036		292.016	13.1014	0.853795								303684
		1037		263.044	6.41288	0.85353								344275
		1038		221.082	2.59474	0.820145								339227
		1039		314.109	11.2937	0.853368								293825
		1040		70.439	2.42928	0.851011								307188
		1041		254.092	2.4884	0.853507								321704
		1042		580.641	13.8468	0.853057								248602
		1043		404.783	13.8499	0.853266								316954
		1044		304.236	2.49151	0.854191								223893
		1045		142.926	2.82391	0.731739								195688
		1046		328.058	13.4856	0.854468								291304
		1047		314.896	13.8593	0.800498								324303
		1048		121.171	4.20691	0.851864								204777
		1049		146.028	7.11031	0.820142								1.20391e+06
		1050		146.028	13.5044	0.82146								212911
		1051		146.028	8.73767	0.681799								183420
		1052		371.317	2.56026	0.854307								307139
		1053		371.317	3.86764	0.829449								32248.5
		1054		215.14	7.16453	0.853982								340360
		1055		215.148	4.20378	0.852026								280297
		1056		215.148	2.81134	0.743591								178454
		1057		160.106	4.22253	0.829566								272693
		1058		160.106	7.1135	0.799632								39602.2
		1059		160.106	3.81253	0.637819								272531
		1060		184.971	13.5076	0.853331								280907
		1061		254.891	13.9222	0.819349								273412
		1062		282.401	2.44173	0.856111								668579
		1063		292.134	13.3719	0.853396								332770
		1064		303.145	7.09439	0.816883								76453
		1065		303.145	7.44231	0.784702								76453
		1066		188.035	6.5913	0.854547								341115
		1067		217.119	14.4336	0.850792								338869
		1068		217.119	8.88545	0.775133								238322
		1069		217.119	9.26215	0.536581								244910
		1070		328.071	13.0123	0.646789								293792
		1071		269.092	16.7928	0.854923								310211
		1072		88.0524	13.0028	0.822373								374520
		1073		581.365	7.10076	0.854082								279989
		1074		298.046	2.63248	0.844508								167959
		1075		157.062	9.18367	0.683912								88370.7
		1076		157.2	13.897	0.854382								228575
		1077		495.256	7.10395	0.853096								267380
		1078		165.061	7.74991	0.838862								323814
		1079		162.049	13.0499	0.701781								321203
		1080		247.072	2.39184	0.855041								278899
		1081		247.072	3.44095	0.829621								18624.6
		1082		243.976	13.5013	0.854737								295130
		1083		500.11	13.8531	0.854475								329544
		1084		500.111	14.8316	0.812268								6679.32
		1085		181.05	12.425	0.831652								346107
		1086		322.091	13.6781	0.854021								293226
		1087		116.979	13.3084	0.849163								334807
		1088		116.978	13.9033	0.847945								116908
		1089		307.126	13.6118	0.853366								291936
		1090		329.233	8.03322	0.834414								77158.3
		1091		365.139	2.35371	0.812693								313261
		1092		365.137	11.2937	0.831863								54205.3
		1093		236.988	13.5264	0.853152								296881
		1094		580.652	13.8562	0.853541								285387
		1095		578.01	13.9033	0.853182								225239
		1096		387.14	13.7004	0.853631								242339
		1097		328.257	2.44173	0.855369								226952
		1098		521.082	2.55722	0.853468								150516
		1099		402.165	13.5644	0.855591								282079
		1100		484.672	13.8531	0.852436								232984
		1101		222.077	7.46178	0.854771								319808
		1102		258.182	12.9934	0.78127								304099
		1103		258.182	11.8705	0.821754								49089.4
		1104		258.182	13.3656	0.815327								302456
		1105		261.069	2.70146	0.854144								301524
		1106		481.164	13.3719	0.853372								314656
		1107		282.756	2.44795	0.850417								261972
		1108		133.087	4.35331	0.83349								206487
		1109		555.313	3.06532	0.853997								278469
		1110		187.025	13.072	0.849491								169372
		1111		187.025	13.919	0.794919								272515
		1112		175.097	8.50345	0.84078								101437
		1113		245.114	13.0185	0.800395								287934
		1114		245.114	12.655	0.841402								287934
		1115		229.083	13.7195	0.845466								57909.6
		1116		314.11	13.3656	0.810737								26991.1
		1117		96.9696	14.2078	0.755164								1.28544e+07
		1118		442.017	14.2656	0.765482								279233
		1119		155.976	13.0311	0.85304								295365
		1120		229.08	13.0091	0.822518								279918
		1121		612.955	13.8531	0.852813								256386
		1122		477.032	13.8531	0.853431								228024
		1123		88.1479	13.0311	0.854592								249980
		1124		162.041	13.6275	0.848767								278752
		1125		162.039	7.61072	0.830487								90627.8
		1126		162.042	8.29539	0.799246								90058.2
		1127		162.041	16.2783	0.553678								76701.5
		1128		173.986	13.0154	0.853055								287544
		1129		353.948	13.8907	0.852648								260112
		1130		152.996	9.72964	0.790446								318441
		1131		135.018	13.5391	0.854999								318629
		1132		160.108	7.6172	0.845224								8789.86
		1133		299.149	2.09622	0.846772								297997
		1134		136.914	13.8437	0.852968								273069
		1135		196.941	13.8625	0.853617								281227
		1136		186.017	13.8625	0.85252								283442
		1137		186.017	13.0091	0.842814								110798
		1138		359.125	13.1272	0.841377								39083.6
		1139		359.125	12.5432	0.839327								24256.3
		1140		281.2	2.43862	0.854749								512329
		1141		218.086	13.5897	0.853182								257669
		1142		470.761	13.8844	0.853489								269173
		1143		411.206	2.67011	0.852244								190342
		1144		88.0311	13.0248	0.855007								509712
		1145		147.045	4.08371	0.841148								135584
		1146		147.045	8.8559	0.778411								301534
		1147		492.836	13.9096	0.852485								254189
		1148		599.131	2.51333	0.853658								165604
		1149		133.087	13.6402	0.852632								275539
		1150		311.287	2.4106	0.853649								226079
		1151		149.035	4.20378	0.834536								71655.2
		1152		149.035	13.7259	0.825812								312140
		1153		230.148	2.60103	0.853639								264503
		1154		230.148	3.90011	0.829132								30234.1
		1155		368.816	13.8437	0.85366								233268
		1156		373.169	2.08028	0.85372								248572
		1157		244.155	7.10076	0.848483								174560
		1158		244.155	4.22253	0.834333								233406
		1159		244.155	2.89349	0.832265								64967
		1160		288.226	4.22253	0.812416								186588
		1161		376.074	2.60103	0.852594								188758
		1162		544.683	13.8499	0.853159								254831
		1163		137.038	7.66243	0.836358								5476.73
		1164		356.903	13.9064	0.854441								227428
		1165		283.228	2.54773	0.852582								275436
		1166		327.108	7.61396	0.837672								36055.9
		1167		230.052	12.9966	0.853026								278175
		1168		290.935	13.9253	0.852378								259667
		1169		307.061	7.60103	0.821244								293358
		1170		223.056	14.1726	0.853456								285010
		1171		391.198	7.09122	0.844189								33320.9
		1172		277.115	13.394	0.852595								275629
		1173		160.968	13.9064	0.804654								272673
		1174		152.927	13.8499	0.852674								264725
		1175		280.167	7.09122	0.852353								256586
		1176		152.996	13.596	0.830033								60858.5
		1177		219.099	11.2937	0.840383								284940
		1178		254.148	2.70146	0.852926								263928
		1179		254.148	4.17247	0.840702								84785.7
		1180		233.125	16.7675	0.853531								289316
		1181		158.043	13.0248	0.853111								250401
		1182		232.939	13.5296	0.85331								231483
		1183		220.025	7.06579	0.825587								265248
		1184		137.02	2.92526	0.851248								171989
		1185		244.084	13.5897	0.840755								64862
		1186		244.084	9.06904	0.730383								285359
		1187		244.084	14.3497	0.792926								35047.8
		1188		555.313	7.10076	0.849289								180616
		1189		88.0477	13.0028	0.854375								354788
		1190		279.092	4.87406	0.852112								287711
		1191		606.287	13.6181	0.852862								236821
		1192		120.055	13.0091	0.770358								274641
		1193		374.212	2.86807	0.842673								94370.5
		1194		293.029	13.0122	0.854767								236648
		1195		257.155	2.64503	0.854639								189228
		1196		257.155	3.79952	0.828445								16821.7
		1197		581.349	16.7706	0.852814								272317
		1198		148.052	13.4981	0.787744								266970
		1199		294.12	11.9645	0.795126								281729
		1200		293.918	13.8593	0.852753								216639
		1201		487.178	13.8844	0.852997								140906
		1202		258.241	2.46972	0.854848								401695
		1203		437.249	2.43862	0.853027								202323
		1204		140.083	13.6244	0.853283								285301
		1205		176.064	11.9612	0.677778								185924
		1206		176.064	13.006	0.642291								269985
		1207		230.126	14.5016	0.790504								247624
		1208		214.057	9.89904	0.853536								291875
		1209		618.597	13.8468	0.851952								190420
		1210		310.012	13.8123	0.853281								246627
		1211		113.926	13.0154	0.774592								259368
		1212		113.926	11.958	0.807433								18877.5
		1213		113.926	13.4003	0.730906								301928
		1214		212.09	9.82087	0.728562								273725
		1215		212.09	9.3405	0.701859								185577
		1216		316.084	13.5013	0.853244								220946
		1217		173.065	10.3407	0.811654								83980.6
		1218		173.065	11.2679	0.773272								271416
		1219		173.065	9.38298	0.801549								30218.9
		1220		107.036	1.87069	0.840436								63999.8
		1221		215.052	13.6149	0.852927								247565
		1222		219.062	13.6212	0.853843								257299
		1223		247.17	2.58532	0.853651								184681
		1224		556.317	7.09122	0.853582								210296
		1225		243.224	2.48217	0.851427								199786
		1226		550.878	13.9001	0.852912								211007
		1227		299.097	13.394	0.854564								254782
		1228		282.02	13.9064	0.852291								132065
		1229		236.1	16.777	0.853229								261392
		1230		275.056	12.9997	0.847087								222228
		1231		275.054	11.9191	0.827019								33746.7
		1232		715.511	4.23192	0.852482								232918
		1233		715.511	3.0399	0.850519								163854
		1234		452.072	2.63558	0.853005								153178
		1235		570.277	7.09439	0.852716								239142
		1236		431.226	2.0707	0.768499								12686.5
		1237		319.027	13.3339	0.854964								248408
		1238		319.028	14.1631	0.828584								22136.6
		1239		301.266	2.63247	0.853532								260722
		1240		633.127	14.1918	0.854212								247082
		1241		145.248	13.3877	0.852662								162796
		1242		236.174	2.51959	0.853016								214374
		1243		366.837	13.8625	0.853185								234714
		1244		506.746	13.8593	0.853216								253819
		1245		574.999	13.8468	0.853792								213138
		1246		214.039	13.0154	0.85289								249167
		1247		302.221	2.46665	0.85254								170999
		1248		292.821	13.8531	0.853361								240725
		1249		262.096	2.32158	0.851892								196155
		1250		262.093	12.9997	0.838515								44366.5
		1251		303.035	13.755	0.855149								199753
		1252		583.328	16.7833	0.853074								264575
		1253		380.255	2.4324	0.853693								201913
		1254		144.973	13.9032	0.853502								237209
		1255		304.192	2.5227	0.850578								244878
		1256		304.192	3.70227	0.830934								26528.4
		1257		301.115	13.5076	0.853968								239064
		1258		173.346	16.7897	0.79057								175060
		1259		280.05	13.3719	0.852935								241238
		1260		344.04	11.3001	0.853742								235287
		1261		233.078	13.517	0.853472								204896
		1262		270.207	2.57278	0.851551								241480
		1263		270.207	2.96343	0.846627								259094
		1264		484.813	13.8813	0.852621								206652
		1265		604.007	13.9127	0.853017								237538
		1266		387.185	2.08028	0.852453								230357
		1267		583.345	3.06532	0.854429								221594
		1268		88.0618	13.0185	0.849822								37465.8
		1269		161.065	10.7571	0.692317								204877
		1270		256.106	2.46661	0.853608								323155
		1271		695.44	16.7738	0.852289								259261
		1272		439.086	13.8907	0.849948								209307
		1273		439.086	14.8153	0.848671								110048
		1274		289.123	13.4572	0.853534								252383
		1275		274.141	14.1279	0.831021								261049
		1276		143.09	4.20377	0.853468								231124
		1277		132.046	2.80192	0.824629								239935
		1278		131.054	9.03637	0.854507								264141
		1279		131.054	12.6911	0.81176								12819.8
		1280		529.28	2.80506	0.853039								213493
		1281		256.367	2.47283	0.853817								291880
		1282		238.859	13.9348	0.802783								248868
		1283		196.059	12.2382	0.702218								253352
		1284		196.059	11.9612	0.692812								253352
		1285		327.191	2.08348	0.852883								229644
		1286		463.978	13.9826	0.852565								229466
		1287		217.007	11.284	0.851945								246571
		1288		327.087	13.0122	0.686291								233998
		1289		143.125	4.20377	0.853615								216577
		1290		146.046	4.09965	0.811335								327334
		1291		354.061	13.9475	0.836709								250329
		1292		116.031	11.2195	0.852041								230245
		1293		146.046	2.83018	0.74309								231182
		1294		255.59	2.34088	0.853451								188774
		1295		376.022	13.973	0.852753								218525
		1296		163.113	2.62617	0.832827								149201
		1297		556.326	3.07168	0.853977								219275
		1298		700.978	13.9222	0.847451								166865
		1299		108.022	2.92209	0.797519								158043
		1300		457.369	2.36012	0.852524								223315
		1301		523.287	7.09439	0.853534								225091
		1302		202.033	13.0154	0.852684								234966
		1303		497.182	13.8844	0.854088								158504
		1304		497.182	14.8088	0.828552								19470.6
		1305		410.909	13.9001	0.851737								204037
		1306		135.066	8.07241	0.834542								75939.2
		1307		135.066	7.51368	0.781023								242282
		1308		417.211	2.06114	0.848207								235963
		1309		214.153	2.82076	0.761784								163293
		1310		205.083	11.7991	0.81897								252955
		1311		177.077	7.17411	0.711238								228468
		1312		239.023	13.473	0.854279								229319
		1313		281.159	2.05476	0.821568								217023
		1314		309.153	2.13141	0.852217								220501
		1315		189.06	13.2663	0.852749								238996
		1316		87.0217	1.89646	0.804741								9655.53
		1317		147.049	9.9904	0.796758								215577
		1318		147.049	11.2486	0.81864								26044.8
		1319		287.079	4.33721	0.854795								236762
		1320		272.836	13.8531	0.854341								669851
		1321		255.189	2.47594	0.845817								199972
		1322		613.151	14.195	0.85399								215863
		1323		300.026	2.94752	0.848094								136515
		1324		300.026	2.68892	0.85061								136515
		1325		249.58	2.35692	0.854764								230058
		1326		256.095	13.5802	0.852474								173394
		1327		818.555	4.37907	0.851537								237348
		1328		120.888	4.21003	0.84105								203224
		1329		191.103	14.1886	0.851519								225797
		1330		191.104	16.2423	0.806938								15340.9
		1331		242.065	10.5771	0.852502								245004
		1332		350.181	13.6433	0.852794								202268
		1333		369.121	11.8607	0.853564								229097
		1334		310.021	13.7681	0.854002								194425
		1335		90.047	13.0091	0.727177								202883
		1336		302.055	13.0154	0.662308								206325
		1337		302.055	2.67011	0.597903								185965
		1338		481.426	2.5071	0.853665								166370
		1339		190.936	14.1918	0.806333								238538
		1340		190.936	16.3508	0.828351								10287.1
		1341		306.171	4.21315	0.852895								207486
		1342		232.059	8.81326	0.852707								246264
		1343		167.02	2.64817	0.84883								187248
		1344		167.02	3.07488	0.681645								197474
		1345		293.151	7.09122	0.854526								203327
		1346		129.014	7.02746	0.852693								193679
		1347		656.553	13.8437	0.852317								181869
		1348		409.311	2.43862	0.843559								74179.4
		1349		389.094	2.56342	0.852248								83557.6
		1350		373.1	2.59789	0.85378								150273
		1351		146.054	7.15494	0.741464								211418
		1352		506.888	13.897	0.8524								158119
		1353		172.023	13.0028	0.852668								217523
		1354		306.171	2.77992	0.849269								150735
		1355		377.086	13.8813	0.852665								112313
		1356		377.086	14.8186	0.834859								42516.9
		1357		150.017	10.3505	0.827761								34031.8
		1358		441.072	13.8468	0.852899								100504
		1359		142.884	4.20378	0.852077								135883
		1360		285.065	2.67638	0.853339								146416
		1361		143.97	13.897	0.853114								201556
		1362		295.906	13.9064	0.852589								191146
		1363		212.044	13.7419	0.854173								207395
		1364		323.169	2.1058	0.853173								214698
		1365		235.076	14.2882	0.853428								219610
		1366		296.267	2.42928	0.854415								156903
		1367		286.081	13.6749	0.85263								198883
		1368		228.16	6.54592	0.77263								224020
		1369		228.16	2.74848	0.710625								202663
		1370		459.278	2.49152	0.853019								134844
		1371		650.911	13.8531	0.852387								174830
		1372		152.029	9.0135	0.852789								227790
		1373		147.066	7.10713	0.779031								3.01311e+06
		1374		247.033	13.0374	0.841834								22510.9
		1375		222.044	8.79354	0.853045								225835
		1376		222.036	13.0279	0.852588								211980
		1377		82.9541	2.41058	0.849814								163622
		1378		171.03	10.3374	0.820933								59437.1
		1379		171.03	11.2647	0.824957								27483.2
		1380		171.03	10.8943	0.797333								26138.5
		1381		528.803	13.8625	0.852502								206580
		1382		246.146	14.0826	0.829834								194303
		1383		246.146	14.3432	0.745106								194303
		1384		243.046	7.06897	0.761338								228607
		1385		112.955	7.25124	0.753382								237444
		1386		525.112	2.5446	0.851996								145175
		1387		402.011	14.1758	0.766311								214392
		1388		319.133	4.23192	0.852912								172733
		1389		319.133	3.09081	0.82727								19985.4
		1390		319.133	3.62132	0.791658								17769.6
		1391		231.135	4.24132	0.852303								148943
		1392		231.135	3.00804	0.833388								25755.1
		1393		244.2	4.22879	0.850244								121197
		1394		255.292	2.47594	0.852089								132861
		1395		119.048	13.0154	0.719077								175658
		1396		298.861	13.9316	0.819852								178654
		1397		332.858	13.8374	0.852928								193458
		1398		139.976	13.9001	0.793495								197591
		1399		175.025	12.9525	0.849323								198916
		1400		175.027	7.17412	0.814494								27242.4
		1401		281.045	13.9954	0.853824								207577
		1402		146.027	13.5044	0.854045								234227
		1403		242.07	7.5849	0.851943								172839
		1404		242.07	2.37287	0.849526								178727
		1405		242.07	4.22879	0.847449								144471
		1406		242.07	3.39274	0.721915								10065
		1407		235.079	17.1155	0.842946								31430.5
		1408		235.079	16.6876	0.754992								34546.8
		1409		396.857	13.9095	0.852534								160715
		1410		405.108	13.8813	0.849783								114482
		1411		405.108	14.8218	0.837247								201386
		1412		158.028	4.21941	0.832028								171909
		1413		158.028	7.11043	0.814348								25533.2
		1414		158.028	4.86435	0.704218								60293.9
		1415		245.071	11.8121	0.850294								219226
		1416		245.071	11.3744	0.845537								190472
		1417		176.095	13.6339	0.85228								199074
		1418		318.076	13.2663	0.85106								164267
		1419		205.065	2.5728	0.851362								280003
		1420		332.676	2.06114	0.85259								165661
		1421		316.854	13.8531	0.85259								210170
		1422		259.079	12.9997	0.852683								184306
		1423		222.036	10.5574	0.82285								32407.4
		1424		178.044	13.3656	0.686492								175254
		1425		253.276	2.48217	0.851391								145462
		1426		247.041	7.14537	0.758444								206378
		1427		281.178	2.4324	0.855567								303762
		1428		122.025	13.4445	0.667366								169973
		1429		228.036	13.5044	0.852939								200359
		1430		470.78	13.8813	0.852636								135155
		1431		115.208	4.26037	0.847968								87259.8
		1432		88.0271	13.0028	0.852216								196541
		1433		95.0332	13.4161	0.853761								187267
		1434		202.072	7.2221	0.849757								197470
		1435		87.0345	3.0144	0.786851								29158.2
		1436		209.041	13.5233	0.852839								170130
		1437		366.827	13.8311	0.852541								187789
		1438		204.019	13.0248	0.852257								192720
		1439		281.073	13.006	0.852603								195235
		1440		424.247	7.09758	0.852406								149728
		1441		278.929	13.9285	0.853678								212543
		1442		336.836	13.9222	0.853139								126212
		1443		188.137	2.73593	0.850602								182126
		1444		198.158	2.61046	0.853413								199407
		1445		198.158	2.17638	0.838739								121945
		1446		198.158	3.92906	0.783833								16732.7
		1447		147.068	13.3845	0.840494								206002
		1448		100.946	2.00008	0.853999								208974
		1449		190.051	8.9512	0.854233								206995
		1450		117.083	3.01759	0.843194								42617.9
		1451		117.083	4.22878	0.775696								162417
		1452		332.078	13.6433	0.852051								169680
		1453		452.92	13.8844	0.852866								143455
		1454		157.009	13.9064	0.830738								113163
		1455		144.876	13.3877	0.852359								176122
		1456		243.053	2.58856	0.822182								84702.9
		1457		171.377	2.66384	0.850757								164893
		1458		623.49	2.50087	0.851076								159517
		1459		216.168	2.62304	0.850125								168443
		1460		216.168	2.96024	0.839812								168443
		1461		190.882	13.8499	0.852278								145995
		1462		195.936	13.8562	0.852883								161748
		1463		261.098	11.2937	0.79945								28689.6
		1464		387.275	2.69519	0.85414								196310
		1465		421.075	14.3917	0.802932								202912
		1466		454.88	13.8938	0.853415								159366
		1467		522.331	16.7738	0.852499								185688
		1468		159.939	13.0091	0.654101								87370.4
		1469		448.161	2.77991	0.852768								156660
		1470		282.157	15.248	0.774585								203201
		1471		282.157	14.7468	0.704212								90034.1
		1472		155.083	4.23192	0.786338								126642
		1473		143.09	2.82705	0.8475								173807
		1474		313.294	2.52895	0.853316								125624
		1475		109.992	8.77386	0.852511								196127
		1476		198.113	7.09758	0.787409								162489
		1477		148.07	7.09758	0.849085								192472
		1478		506.992	14.2174	0.847621								180881
		1479		119.05	4.14392	0.839572								93379.6
		1480		119.05	2.76418	0.754746								208988
		1481		119.05	10.7571	0.799661								25191
		1482		119.05	8.86575	0.736905								10552.4
		1483		209.085	2.08985	0.852331								200191
		1484		88.0505	13.0248	0.851159								246839
		1485		229.044	13.3814	0.852221								166032
		1486		283.078	10.0492	0.689302								188339
		1487		298.88	13.919	0.852387								160066
		1488		219.045	11.8056	0.851467								209015
		1489		219.045	11.3711	0.84137								171675
		1490		645.034	13.7713	0.852454								166383
		1491		293.486	14.2302	0.850793								166733
		1492		468.257	14.7533	0.852145								196258
		1493		318.131	11.2969	0.852449								168767
		1494		523.287	3.07486	0.849541								40965.9
		1495		251.148	2.05794	0.847661								133325
		1496		261.134	7.09122	0.626277								84474.6
		1497		244.065	7.60749	0.846868								198966
		1498		411.165	13.5739	0.852842								186822
		1499		89.013	5.00651	0.693233								120178
		1500		147.066	8.74097	0.673017								700510
		1501		145.816	13.5139	0.85244								114449
		1502		600.323	7.09758	0.852087								168426
		1503		281.299	2.44173	0.854489								452796
		1504		313.275	2.58532	0.853266								168269
		1505		313.275	2.30549	0.832184								168269
		1506		388.835	13.8719	0.85231								174763
		1507		98.0611	7.88651	0.839517								133924
		1508		98.0611	7.16134	0.820936								51492.6
		1509		98.0612	9.50402	0.806734								20988.3
		1510		193.05	2.26672	0.798623								75907.7
		1511		331.046	13.4918	0.854161								165433
		1512		331.043	11.255	0.825795								19414.7
		1513		146.101	16.9156	0.852869								202287
		1514		402.322	2.87123	0.854221								167889
		1515		171.047	13.0154	0.852353								176791
		1516		547.121	13.9602	0.851865								169917
		1517		386.033	13.5233	0.851939								173459
		1518		543.257	7.10713	0.851714								166339
		1519		791.527	4.41452	0.849496								180815
		1520		791.527	3.06532	0.841807								165525
		1521		291.145	2.13461	0.839345								80348
		1522		291.145	7.09759	0.824873								44396.3
		1523		687.48	3.0399	0.850073								142041
		1524		687.48	4.24448	0.851162								136651
		1525		302.985	3.06851	0.848808								124672
		1526		233.078	11.4558	0.846272								81945
		1527		272.088	13.5013	0.851428								138317
		1528		272.089	14.179	0.815503								26955.7
		1529		608.079	13.7483	0.852528								174688
		1530		196.036	14.1854	0.845306								97012.1
		1531		92.0434	7.09124	0.851838								175571
		1532		281.089	7.27036	0.854071								185063
		1533		281.088	4.90314	0.833265								10103.2
		1534		468.237	7.09758	0.851988								147492
		1535		311.938	13.8938	0.852502								160472
		1536		256.2	2.62931	0.853892								152040
		1537		588.834	13.8907	0.852539								125294
		1538		159.041	11.5376	0.78932								172482
		1539		555.127	14.195	0.853683								177184
		1540		337.185	2.09303	0.851765								158346
		1541		430.159	2.77992	0.852578								156746
		1542		253.26	2.49151	0.85318								205006
		1543		238.189	2.51647	0.850331								106912
		1544		538.056	13.8531	0.852397								116725
		1545		373.1	13.694	0.852908								169000
		1546		159.973	13.8907	0.852667								126955
		1547		267.197	2.28287	0.851472								177158
		1548		267.197	2.62616	0.841894								177158
		1549		240.952	13.8844	0.852784								156137
		1550		432.815	13.9127	0.852207								131776
		1551		522.284	3.07486	0.852684								163864
		1552		114.056	16.8056	0.62368								177964
		1553		170.901	2.67638	0.851296								159643
		1554		106.014	13.3877	0.85228								120199
		1555		132.998	13.5581	0.838013								18390.5
		1556		336.17	7.09439	0.852628								145693
		1557		134.061	2.86491	0.844265								123795
		1558		327.233	2.37926	0.852318								150042
		1559		582.649	13.8656	0.852645								138956
		1560		117.069	11.2098	0.747248								177145
		1561		408.241	16.7643	0.852286								150259
		1562		432.824	13.8719	0.8524								158315
		1563		429.85	13.8719	0.852389								124761
		1564		461.182	2.92843	0.852175								175579
		1565		374.045	2.67008	0.817394								94406
		1566		598.308	7.09439	0.852351								157431
		1567		88.0249	12.9997	0.85151								152378
		1568		197.022	13.577	0.817283								159101
		1569		274.06	7.24138	0.835652								62077.9
		1570		274.061	11.197	0.802015								181639
		1571		192.059	12.088	0.831424								32903
		1572		192.059	13.0248	0.773501								144995
		1573		349.206	2.08666	0.84482								1.92462e+06
		1574		211.113	2.63562	0.853071								150592
		1575		146.09	4.21628	0.850197								151090
		1576		146.09	2.88408	0.81928								40599.5
		1577		492.855	13.8938	0.850617								144652
		1578		309.156	2.83018	0.850911								134430
		1579		87.8752	13.0091	0.852873								131439
		1580		258.945	13.9033	0.851811								150369
		1581		356.922	13.8907	0.851735								141419
		1582		175.105	16.7802	0.852565								146503
		1583		788.545	4.42096	0.848413								170050
		1584		788.545	3.08124	0.73031								142683
		1585		428.325	2.74848	0.851595								149004
		1586		330.04	13.0091	0.840793								68210.6
		1587		330.04	11.2582	0.774929								171345
		1588		605.073	14.1214	0.852205								162688
		1589		244.163	2.62618	0.852239								135063
		1590		244.163	4.08371	0.769946								19639
		1591		210.025	4.9645	0.853438								169932
		1592		435.252	7.09759	0.8528								171926
		1593		220.098	2.9348	0.837977								38914
		1594		295.134	2.52895	0.85336								116805
		1595		192.053	9.26867	0.852668								177954
		1596		205.072	12.9682	0.665184								152488
		1597		231.955	13.5612	0.851846								151071
		1598		117.919	13.0185	0.847288								137697
		1599		117.919	13.3972	0.840369								142382
		1600		454.899	13.9033	0.849829								145282
		1601		403.555	13.5107	0.853055								153314
		1602		517.353	2.66071	0.852134								130303
		1603		299.209	7.89951	0.833573								176990
		1604		144.03	7.51043	0.700673								147727
		1605		165.108	2.83962	0.83459								109108
		1606		233.078	9.46805	0.852291								176526
		1607		497.272	7.09441	0.852575								167500
		1608		149.045	11.2808	0.798081								173415
		1609		181.976	13.5107	0.852127								126339
		1610		238.065	13.0721	0.851715								147227
		1611		360.985	13.9159	0.79578								125112
		1612		567.052	13.9253	0.852655								139124
		1613		498.171	2.35371	0.853069								157651
		1614		498.171	3.36383	0.835441								10072
		1615		157.013	7.65593	0.849273								188587
		1616		157.012	8.88217	0.815107								41673.8
		1617		233.896	13.8437	0.852328								155590
		1618		136.912	13.8374	0.852264								141759
		1619		428.325	4.22879	0.851953								110678
		1620		88.0538	13.0154	0.850799								165960
		1621		173.101	7.09122	0.851951								135456
		1622		262.07	10.7539	0.851967								169304
		1623		247.97	13.5044	0.786387								150267
		1624		274.998	11.3033	0.852289								149156
		1625		306.071	14.1886	0.853382								155669
		1626		118.076	11.2324	0.853086								167654
		1627		227.071	16.239	0.852862								165564
		1628		204.132	4.21003	0.85132								129688
		1629		204.132	2.82705	0.849314								97294.5
		1630		133.063	13.5422	0.853347								183285
		1631		314.209	7.09758	0.852699								120024
		1632		427.025	14.005	0.848476								158602
		1633		96.9866	13.8405	0.841137								50899.6
		1634		214.955	13.9127	0.850881								124069
		1635		320.157	13.6275	0.852324								166507
		1636		298.06	13.006	0.685335								130629
		1637		276.128	14.0115	0.852581								148679
		1638		537.063	13.8844	0.852405								119460
		1639		142.884	2.82076	0.852506								123262
		1640		542.695	13.8562	0.851022								130041
		1641		70.946	6.75671	0.851478								160221
		1642		97.0616	13.8687	0.85535								405642
		1643		272.828	13.8593	0.852242								152187
		1644		349.054	14.2624	0.800629								164923
		1645		236.065	13.5139	0.776101								70265.2
		1646		483.152	2.36971	0.85251								139048
		1647		483.151	3.34778	0.834851								9967.44
		1648		143.088	4.2069	0.846416								129930
		1649		672.986	13.8499	0.851336								121648
		1650		143.331	4.20066	0.850781								117053
		1651		74.9907	2.57606	0.849365								113729
		1652		143.091	4.21316	0.852535								187906
		1653		197.043	7.46827	0.793112								191370
		1654		266.088	14.2046	0.851269								145781
		1655		530.283	7.09441	0.850376								126997
		1656		256.155	2.88713	0.703558								77646.7
		1657		328.294	2.54147	0.852997								156090
		1658		328.294	3.91621	0.82257								8672.24
		1659		319.037	14.1758	0.852787								151776
		1660		494.252	3.0685	0.852065								139214
		1661		294.96	13.8939	0.851877								144339
		1662		200.073	13.006	0.852626								139136
		1663		336.818	13.9285	0.85247								139958
		1664		319.1	13.5581	0.853229								135627
		1665		352.868	13.9159	0.851715								103361
		1666		651.521	2.51958	0.852942								146238
		1667		92.0254	7.65593	0.761094								174975
		1668		305.099	7.84745	0.853138								169969
		1669		305.099	13.0028	0.740175								8837.66
		1670		441.082	13.8625	0.849277								74377.5
		1671		273.073	12.984	0.849343								42945
		1672		273.073	12.3955	0.682303								4013.62
		1673		271.155	4.22566	0.836714								128729
		1674		133.07	11.2969	0.851986								155268
		1675		604.705	13.8719	0.851954								132685
		1676		444.023	13.8374	0.851393								110552
		1677		242.148	2.18283	0.853165								157712
		1678		131.035	13.2337	0.817788								1.33886e+06
		1679		664.117	13.4161	0.851719								130141
		1680		303.131	13.8343	0.849756								84366.4
		1681		303.131	11.8672	0.83962								41808.6
		1682		281.979	13.8437	0.819384								98711.3
		1683		439.096	14.1567	0.852799								140168
		1684		243.171	3.03034	0.824861								103264
		1685		821.283	2.55086	0.852233								79725.3
		1686		640.96	13.9127	0.852549								126473
		1687		487.343	2.77048	0.852457								126655
		1688		326.27	2.4822	0.84831								75358.9
		1689		158.054	10.203	0.84042								60209.3
		1690		700.058	13.9158	0.851179								149312
		1691		475.111	13.5013	0.852205								138694
		1692		223.064	14.1758	0.830297								48900.2
		1693		223.065	3.06532	0.78711								130453
		1694		174.062	13.6339	0.850541								58297.1
		1695		390.798	13.8531	0.851268								122233
		1696		314.98	13.8719	0.847528								129013
		1697		336.971	13.897	0.850646								125059
		1698		301.06	2.88078	0.850777								88768.2
		1699		602.726	13.8656	0.852012								126870
		1700		131.048	9.03965	0.838849								21102.4
		1701		214.976	13.394	0.851072								143633
		1702		443.317	2.82077	0.849186								113504
		1703		139.051	5.73644	0.711236								148285
		1704		196.926	13.9316	0.744024								134206
		1705		328.89	13.9127	0.849104								90208.2
		1706		156.961	13.9158	0.850636								80249.1
		1707		421.142	2.77048	0.851308								124050
		1708		146.02	13.5044	0.852096								142765
		1709		202.981	13.495	0.851036								156006
		1710		399.348	3.84171	0.82538								14161.6
		1711		77.0395	4.21628	0.851744								127559
		1712		283.137	2.11539	0.851702								118692
		1713		245.987	13.3877	0.85238								162718
		1714		213.013	13.656	0.809811								104834
		1715		213.013	11.1486	0.690405								168619
		1716		213.013	10.8354	0.627886								168619
		1717		247.119	7.12948	0.800404								49293
		1718		340.125	11.3291	0.851778								135768
		1719		171.077	13.3972	0.708086								139167
		1720		171.077	11.5999	0.757726								23559
		1721		171.077	12.5301	0.655459								97943.6
		1722		328.177	2.30872	0.851471								127024
		1723		156.734	13.897	0.850924								105232
		1724		761.083	13.9033	0.851573								131344
		1725		300.131	13.4383	0.852064								113568
		1726		468.771	13.8437	0.85183								87589.6
		1727		213.049	13.4003	0.853543								127661
		1728		288.131	14.1663	0.846728								132846
		1729		288.131	14.8153	0.846954								94540.9
		1730		401.2	2.07708	0.851977								150833
		1731		253.093	12.1566	0.850519								157861
		1732		253.093	11.5966	0.838813								64815.8
		1733		494.815	13.9159	0.850502								117161
		1734		184.974	13.5107	0.852227								110720
		1735		472.759	13.8875	0.852047								105992
		1736		189.088	11.3387	0.750436								150663
		1737		260.976	14.411	0.744111								128457
		1738		260.976	16.0909	0.492924								49966.3
		1739		563.218	2.58221	0.850752								106479
		1740		191.987	13.4887	0.849796								124341
		1741		191.987	14.1085	0.834442								37166.7
		1742		191.987	14.3012	0.736573								29445.1
		1743		521.151	13.7036	0.851831								110524
		1744		210.077	8.84279	0.848623								146586
		1745		243.135	7.11986	0.85346								119743
		1746		243.135	6.50038	0.678621								6465.85
		1747		241.05	13.3814	0.852619								122175
		1748		384.012	13.7582	0.850994								134332
		1749		256.111	16.7802	0.848529								137983
		1750		481.257	4.22566	0.851418								94750.9
		1751		96.9689	13.8499	0.852749								1.28544e+07
		1752		348.213	16.7897	0.851536								144775
		1753		328.183	2.07709	0.851792								131904
		1754		144.834	13.3908	0.851135								100264
		1755		145.044	13.3972	0.851049								157014
		1756		371.137	11.8121	0.851661								147427
		1757		371.137	11.3033	0.817334								11441.3
		1758		72.9431	6.66912	0.851363								137034
		1759		758.498	3.0399	0.85271								122366
		1760		614.144	14.1822	0.850826								109261
		1761		658.551	13.8531	0.851212								107365
		1762		292.906	13.8468	0.852278								137919
		1763		189.04	13.0562	0.765286								112311
		1764		75.0777	3.43128	0.844446								101982
		1765		448.846	13.9033	0.852025								98688.7
		1766		205.942	2.07071	0.851734								138909
		1767		167.997	12.9589	0.851946								151121
		1768		210.065	13.6591	0.851708								106595
		1769		160.993	13.8844	0.85188								118791
		1770		453.282	7.09122	0.851866								116516
		1771		302.161	7.10076	0.852432								126650
		1772		143.976	12.9997	0.851366								143900
		1773		143.976	13.5675	0.838387								47894.3
		1774		204.994	7.1358	0.789299								124179
		1775		371.144	12.235	0.849009								33389
		1776		273.069	13.7454	0.852812								141406
		1777		245.039	10.5311	0.741115								145285
		1778		587.979	14.227	0.851289								135484
		1779		147.066	2.80506	0.68238								691767
		1780		161.047	7.59453	0.847151								183843
		1781		301.006	2.90644	0.841752								74683.9
		1782		324.2	3.06532	0.849203								117161
		1783		324.2	4.49201	0.84719								114448
		1784		270.003	13.5896	0.846803								134566
		1785		246.073	13.6654	0.851725								130178
		1786		462.738	13.8625	0.852163								118033
		1787		508.726	13.8593	0.851858								100901
		1788		162.085	4.21316	0.590372								111669
		1789		143.132	4.21627	0.852213								134415
		1790		156.028	13.302	0.851142								138618
		1791		156.028	13.006	0.839095								138618
		1792		281.114	8.4902	0.819519								13665
		1793		274.152	13.8844	0.850273								93834
		1794		274.152	14.1279	0.841659								93834
		1795		918.301	2.56026	0.850839								108817
		1796		401.161	2.94433	0.852291								129906
		1797		168.033	7.58488	0.851687								146852
		1798		583.345	7.1135	0.851935								114854
		1799		74.9396	3.11644	0.845452								106624
		1800		74.9396	3.41843	0.65016								106624
		1801		314.168	2.08667	0.852229								136192
		1802		319.091	13.5802	0.851739								136762
		1803		216.135	14.3723	0.803084								148650
		1804		260.026	14.1822	0.852763								135535
		1805		257.195	2.61361	0.851545								121348
		1806		257.195	4.06435	0.828407								24328.4
		1807		305.064	13.4698	0.850254								134244
		1808		292.115	13.4509	0.851955								109952
		1809		125.001	13.5328	0.852997								126856
		1810		554.346	3.06532	0.852543								109968
		1811		301.023	2.94751	0.84688								85699.9
		1812		323.097	13.4856	0.850079								118711
		1813		323.096	11.7991	0.838546								36770.8
		1814		192.066	5.60623	0.743898								73902.6
		1815		140.033	13.0122	0.850965								128467
		1816		361.138	13.5739	0.849088								119469
		1817		361.135	11.838	0.842686								61073
		1818		257.095	13.6465	0.851376								114295
		1819		117.019	13.3084	0.837937								5.12128e+07
		1820		206.038	14.0278	0.565358								126191
		1821		287.074	13.3846	0.851805								142817
		1822		163.061	4.10601	0.711875								121566
		1823		178.06	16.7643	0.850993								140711
		1824		120.856	4.21316	0.853178								70520.9
		1825		274.063	13.7419	0.852084								121254
		1826		387.115	13.8813	0.850236								116768
		1827		387.115	14.8382	0.837665								41882.6
		1828		426.858	13.8593	0.851117								106307
		1829		294.101	12.9997	0.850094								126962
		1830		294.102	13.4981	0.848801								101798
		1831		102.089	13.4918	0.852854								140305
		1832		102.089	12.1631	0.837878								27000.6
		1833		356.999	14.179	0.851657								111944
		1834		209.998	13.4541	0.842387								117153
		1835		209.998	14.1118	0.839222								27347.5
		1836		241.012	12.0716	0.804642								145585
		1837		354.086	13.0091	0.65788								113739
		1838		582.378	7.09122	0.851564								110567
		1839		304.115	12.9777	0.721425								134604
		1840		102.023	12.1598	0.839036								26912.8
		1841		636.294	2.51334	0.848061								94984.2
		1842		251.004	13.3719	0.85126								110884
		1843		315.937	13.5802	0.848898								129547
		1844		176.044	14.4239	0.666244								136531
		1845		429.192	2.84909	0.85166								132940
		1846		358.883	13.9253	0.850809								105297
		1847		304.034	11.3097	0.851896								134210
		1848		104.007	13.3972	0.852805								110889
		1849		156.969	13.9096	0.851681								123690
		1850		286.998	11.3001	0.850067								122986
		1851		709.123	14.2046	0.852126								135039
		1852		357.218	3.94219	0.804122								7301.23
		1853		339.113	4.87081	0.669657								132712
		1854		664.107	13.919	0.85139								107551
		1855		246.075	9.04619	0.841293								52525.1
		1856		246.071	11.8056	0.837801								58295.7
		1857		246.071	11.3581	0.813208								48135.4
		1858		143.978	13.9033	0.851395								108826
		1859		272.05	11.2937	0.820117								111497
		1860		272.056	13.7611	0.850806								100498
		1861		134.034	13.5739	0.850877								124342
		1862		134.034	11.2872	0.837756								49423.5
		1863		472.74	13.8844	0.85207								95884.1
		1864		286.188	12.9493	0.821849								37354
		1865		286.188	12.1174	0.77442								136802
		1866		360.047	2.65129	0.852173								68321.8
		1867		369.097	13.0091	0.731421								135740
		1868		307.074	13.495	0.849275								116705
		1869		174.013	13.7225	0.849911								309146
		1870		174.012	14.1822	0.812228								94423.5
		1871		194.082	2.5446	0.742947								118263
		1872		216.118	13.3688	0.851334								111771
		1873		688.294	13.6023	0.851661								94884.2
		1874		157.081	16.7802	0.851627								128873
		1875		320.074	5.30414	0.850622								131230
		1876		835.981	13.8844	0.849722								87865.6
		1877		218.877	13.8625	0.851505								100124
		1878		243.039	13.7713	0.850603								116698
		1879		243.039	13.3845	0.82994								120118
		1880		144.166	4.20065	0.851696								140652
		1881		151.061	9.88927	0.701145								2.30289e+06
		1882		283.105	13.5265	0.852464								103148
		1883		174.333	13.656	0.8507								87778
		1884		771.339	2.77677	0.850652								108246
		1885		272.125	12.9966	0.850305								101967
		1886		502.76	13.8593	0.849246								99913.4
		1887		605.001	13.9127	0.850667								87240.6
		1888		243.03	13.3877	0.852416								115804
		1889		89.0703	12.9997	0.849625								119035
		1890		378.25	2.74848	0.852005								106677
		1891		350.103	14.2366	0.852159								126140
		1892		201.997	13.4129	0.851618								121814
		1893		820.315	2.52583	0.852259								87834.3
		1894		222.044	13.5138	0.850385								109718
		1895		164.973	2.55712	0.853146								109131
		1896		590.813	13.9001	0.851043								93688.7
		1897		331.228	2.60106	0.851466								77381.9
		1898		236.918	13.9411	0.85087								128886
		1899		286.247	2.65757	0.851247								103127
		1900		434.794	13.919	0.851563								93783
		1901		90.0406	13.0122	0.685462								92281
		1902		581.365	3.0685	0.85253								105584
		1903		146.115	4.20378	0.848286								82837.8
		1904		293.055	5.30415	0.851564								130939
		1905		293.052	7.66888	0.834429								40251.6
		1906		293.052	8.76065	0.774389								12389.5
		1907		145.079	13.3972	0.851877								148100
		1908		335.061	8.67182	0.851745								134076
		1909		181.072	11.3581	0.836254								7.42986e+06
		1910		181.07	10.7897	0.843151								675402
		1911		295.137	2.14103	0.852672								118723
		1912		267.146	9.78831	0.796833								123876
		1913		96.7693	13.8437	0.851007								85750.9
		1914		236.877	13.8531	0.851798								108745
		1915		146.071	13.4918	0.844213								154118
		1916		249.088	7.10395	0.849768								111627
		1917		249.088	8.72121	0.847058								62091.1
		1918		439.22	13.0468	0.851698								102988
		1919		819.558	4.36618	0.847789								127953
		1920		819.558	3.07806	0.693865								78280.9
		1921		163.043	3.45057	0.627613								133477
		1922		347.967	13.8061	0.851838								108560
		1923		246.955	13.4793	0.851804								100786
		1924		151.099	2.91574	0.850344								74982.6
		1925		695.062	13.875	0.851978								94780.9
		1926		289.986	13.8311	0.851302								114320
		1927		256.972	13.897	0.851642								96227.2
		1928		483.272	4.2194	0.852328								77441.6
		1929		132.946	13.8562	0.85197								100130
		1930		334.866	13.8625	0.851525								116605
		1931		145.289	13.3845	0.851777								97446.8
		1932		339.07	13.9826	0.851606								102888
		1933		256.08	12.2317	0.839579								128265
		1934		184.013	13.4098	0.851221								80857.9
		1935		568.738	13.8844	0.851457								91475.4
		1936		280.498	2.26349	0.851922								91898.5
		1937		125.072	11.2969	0.850346								112629
		1938		244.141	14.1021	0.851684								129099
		1939		145.087	13.3845	0.599858								109604
		1940		230.913	13.9348	0.849037								117279
		1941		422.977	2.15387	0.851532								118131
		1942		186.038	13.4477	0.851318								91130.6
		1943		225.032	2.62626	0.835875								35771.8
		1944		121.043	4.20377	0.853425								115600
		1945		146.276	13.4981	0.851867								114735
		1946		483.183	12.9746	0.850552								90672.4
		1947		217.017	4.21003	0.851193								84201.7
		1948		116.017	7.64301	0.841116								21727.4
		1949		150.056	3.70879	0.557969								53957.5
		1950		369.151	11.2969	0.851822								119108
		1951		265.042	14.211	0.852881								59465.6
		1952		295.024	13.0091	0.852847								95232.4
		1953		571.289	3.07487	0.851934								102175
		1954		259.141	14.7925	0.83915								58473.2
		1955		259.141	14.3368	0.749464								127234
		1956		529.289	7.09758	0.851551								106226
		1957		403.986	13.473	0.8521								109829
		1958		157.013	13.8405	0.852245								119898
		1959		680.607	13.8499	0.851537								97515.5
		1960		192.967	7.06898	0.668417								123437
		1961		321.137	4.23192	0.851436								81036.9
		1962		277.123	4.31471	0.852833								115651
		1963		277.123	3.15498	0.800756								11283.2
		1964		272.173	13.0594	0.851638								112341
		1965		121.01	4.21628	0.852881								85494
		1966		239.177	2.57921	0.816859								122450
		1967		331.094	16.7706	0.850938								116956
		1968		149.053	13.5013	0.851668								115758
		1969		229.029	13.5707	0.85101								106636
		1970		131.13	16.7802	0.768273								130778
		1971		131.13	16.2423	0.768864								134103
		1972		114.056	7.59781	0.675656								131337
		1973		188.966	13.006	0.85191								108745
		1974		237.055	13.9667	0.850715								119531
		1975		232.102	13.4035	0.852261								112469
		1976		216.96	13.4981	0.85172								101791
		1977		227.14	8.8756	0.705896								111935
		1978		227.14	7.97445	0.608841								50890.9
		1979		357.107	4.24764	0.812629								34200
		1980		88.0556	13.0091	0.850833								168710
		1981		207.164	2.5728	0.852555								112439
		1982		244.059	14.3497	0.851509								110972
		1983		445.193	16.7674	0.850513								96099.8
		1984		89.0169	13.0091	0.852157								114412
		1985		195.024	13.8656	0.851545								99211.4
		1986		425.251	7.10395	0.849113								27664.9
		1987		251.041	16.2423	0.85101								122851
		1988		459.385	2.5446	0.849892								81176.6
		1989		279.197	2.62619	0.851777								77425.9
		1990		88.0515	13.006	0.852701								265985
		1991		219.041	7.4845	0.850709								116895
		1992		219.041	7.07534	0.847806								108366
		1993		199.072	13.5865	0.850048								110437
		1994		199.072	11.2969	0.839177								27725.6
		1995		287.1	14.0244	0.851118								110231
		1996		287.097	14.6846	0.80084								10602.5
		1997		145.042	13.3908	0.815188								149955
		1998		361.074	13.3275	0.853399								108139
		1999		268.86	13.8531	0.851242								104474
[truncated: 3,589 more rows]

## Sheet: putative metabolites
peak_id	medMz	medRt	log10_inten	class	formula	ppm_error	annotation
30	240.067	2.62	7.47	Putative metabolite	C8H16O6S1	-0.59	7-Hydroxyoctanoic acid C8H16O3 + O3S1 -> C8H16O6S1
44	314.086	2.6	7.14	Putative metabolite	C11H14N4O7	1.43	Xanthine C5H4N4O2 + C6H10O5 -> C11H14N4O7
72	242.08	4.24	7.02	Putative metabolite	C12H10N4O2	0.31	Metabolite M6 C30H42N4O4 - C16H30O1 -> C14H12N4O3 - C2H2O1 -> C12H10N4O2
73	242.079	2.37	6.37	Putative metabolite	C12H18O1S2	1.68	2,5-Dimethyl-3-(methyldithio)furan C7H10O1S2 + C5H8 -> C12H18O1S2
84	340.207	2.07	7.02	Putative metabolite	C19H32O3S1	0.05	N-Undecylbenzenesulfonic acid C17H28O3S1 + C2H4 -> C19H32O3S1
94	183.017	13.42	6.95	Putative metabolite	C7H5N1O5	0.4	4-Nitrophenol C6H5N1O3 + C1O2 -> C7H5N1O5
96	224.036	2.57	6.82	Putative metabolite	C7H12O6S1	-0.63	Quinic acid C7H12O6 + S1 -> C7H12O6S1
109	298.16	2.1	6.87	Putative metabolite	C16H26O3S1	0.22	N-Undecylbenzenesulfonic acid C17H28O3S1 - C1H2 -> C16H26O3S1
115	243.087	13.59	6.85	Putative metabolite	C7H18N1O6P1	0.3	Glycerylphosphorylethanolamine C5H14N1O6P1 + C2H4 -> C7H18N1O6P1
117	243.087	13.08	5.46	Putative metabolite	C7H18N1O6P1	0.3	Glycerylphosphorylethanolamine C5H14N1O6P1 + C2H4 -> C7H18N1O6P1
166	165.064	10.38	4.2	Putative metabolite	C5H11N1O5	0.74	glutamate C5H9N1O4 + H2O1 -> C5H11N1O5
174	137.024	2.92	6.4	Putative metabolite	C7H5O3	0.5	Aminochrome o-semiquinone C8H8N1O2 + H-1N-1O1 -> C8H7O3 - C1H2 -> C7H5O3
175	315.089	2.52	5.89	Putative metabolite	C20H13N1O3	0.77	Sanguinarine C20H13N1O4 - O1 -> C20H13N1O3
183	242.064	2.63	6.45	Putative metabolite	C7H14O9	0.34	2,3,4,5,6,7-Hexahydroxyheptanoic acid C7H14O8 + O1 -> C7H14O9
230	322.095	13.68	6.49	Putative metabolite	C10H18N4O6S1	0.33	glutathione C10H17N3O6S1 + H1N1 -> C10H18N4O6S1
238	316.083	2.57	6.23	Putative metabolite	C10H20O9S1	0.64	Arabinopyranobiose C10H18O9 + H2S1 -> C10H20O9S1
270	327.117	11.25	4.16	Putative metabolite	C11H21N1O10	-0.47	Galactose-beta-1,4-xylose C11H20O10 + H1N1 -> C11H21N1O10
281	228.072	14.44	4.28	Putative metabolite	C13H12N2S1	-0.35	1-Methyl-3-(2-thiazolyl)-1H-indole C12H10N2S1 + C1H2 -> C13H12N2S1
308	352.228	2.04	5.77	Putative metabolite	C17H36O5S1	-0.44	Heptadecanoic acid C17H34O2 + O3S1 -> C17H34O5S1 + H2 -> C17H36O5S1
320	254.092	3.58	3.88	Putative metabolite	C9H19O6P1	-0.3	DHAP(8:0) C11H21O7P1 - C2H2O1 -> C9H19O6P1
321	273.07	11.51	5.21	Putative metabolite	C7H15N1O10	-0.02	Lactosamine C12H23N1O10 - C5H8 -> C7H15N1O10
322	273.07	8.08	4.65	Putative metabolite	C7H15N1O10	-0.02	Lactosamine C12H23N1O10 - C5H8 -> C7H15N1O10
323	273.07	7.74	4.65	Putative metabolite	C7H15N1O10	-0.02	Lactosamine C12H23N1O10 - C5H8 -> C7H15N1O10
324	273.07	10.81	4.36	Putative metabolite	C7H15N1O10	-0.02	Lactosamine C12H23N1O10 - C5H8 -> C7H15N1O10
325	273.07	12.44	4.3	Putative metabolite	C7H15N1O10	-0.02	Lactosamine C12H23N1O10 - C5H8 -> C7H15N1O10
326	254.152	2.7	6.24	Putative metabolite	C14H22O4	0.04	Epoxyeremopetasinorol C13H20O3 + C1H2O1 -> C14H22O4
333	238.091	14.11	6.06	Putative metabolite	C6H14N4O6	0.56	Ophthalmic acid C11H19N3O6 - C5H8 -> C6H11N3O6 + H3N1 -> C6H14N4O6
335	198.047	14.2	6.01	Putative metabolite	C8H10N2O2S1	-3.54	Ethionamide sulphoxide C8H10N2O1S1 + O1 -> C8H10N2O2S1
362	405.112	13.44	5.28	Putative metabolite	C12H23N1O14	0.13	1,4-beta-D-Glucan C18H32O18 - C6H10O5 -> C12H22O13 + O1 -> C12H22O14 + H1N1 -> C12H23N1O14
368	223.142	11.22	6.17	Putative metabolite	C9H21N1O5	0.33	Tetraethylene glycol C8H18O5 + H1N1 -> C8H19N1O5 + C1H2 -> C9H21N1O5
380	257.099	14.4	4.41	Putative metabolite	C14H15N3S1	-0.12	Isothipendyl C16H19N3S1 - C2H4 -> C14H15N3S1
391	495.26	7.1	6.08	Putative metabolite	C22H42N1O9P1	0.04	LysoPE(0:0/16:1(9Z)) C21H42N1O7P1 + C1O2 -> C22H42N1O9P1
397	497.185	13.89	5.89	Putative metabolite	C18H31N3O13	0.38	Serylthreonine C7H14N2O5 + C11H17N1O8 -> C18H31N3O13
398	497.186	14.83	4.93	Putative metabolite	C18H31N3O13	-0.02	Serylthreonine C7H14N2O5 + C11H17N1O8 -> C18H31N3O13
408	251.152	2.05	6	Putative metabolite	C14H21N1O3	0.17	Homocapsaicin C19H29N1O3 - C5H8 -> C14H21N1O3
421	229.056	14.44	4.05	Putative metabolite	C13H11N1O1S1	-0.28	6-Methoxy-3-(2-thiazolyl)-1H-indole C12H10N2O1S1 - H1N1 -> C12H9N1O1S1 + C1H2 -> C13H11N1O1S1
442	315.085	2.57	6.39	Putative metabolite	C15H13N3O5	0.38	5'-Hydroxypiroxicam C15H13N3O5S1 - S1 -> C15H13N3O5
451	226.015	3.07	5.71	Putative metabolite	C6H10O7S1	-0.78	citrate/isocitrate C6H8O7 + H2S1 -> C6H10O7S1
471	300.034	2.95	5.87	Putative metabolite	C9H16O7S2	0.15	Cibulins C3H8O1S1 + C6H8O6 -> C9H16O7S1 + S1 -> C9H16O7S2
472	300.034	2.65	5.87	Putative metabolite	C9H16O7S2	0.15	Cibulins C3H8O1S1 + C6H8O6 -> C9H16O7S1 + S1 -> C9H16O7S2
491	581.369	3.07	5.53	Putative metabolite	C28H56N1O9P1	-0.05	PS(18:0/20:0) C44H86N1O10P1 - C16H30O1 -> C28H56N1O9P1
492	581.369	7.1	5.98	Putative metabolite	C28H56N1O9P1	-0.05	PS(18:0/20:0) C44H86N1O10P1 - C16H30O1 -> C28H56N1O9P1
493	581.369	3.61	3.9	Putative metabolite	C28H56N1O9P1	0.12	PS(18:0/20:0) C44H86N1O10P1 - C16H30O1 -> C28H56N1O9P1
504	570.28	7.09	5.95	Putative metabolite	C25H47O12P1	0.02	1-Oleoylglycerophosphoinositol C27H51O12P1 - C2H4 -> C25H47O12P1
511	111.983	8.18	5.05	Putative metabolite	C1H4O4S1	0.26	Heptadecanoic acid C17H34O2 + O3S1 -> C17H34O5S1 - C16H30O1 -> C1H4O4S1
517	920.565	2.45	5.77	Putative metabolite	C57H76Mg1N4O5	1.32	Chlorophyll a C55H72Mg1N4O5 + C2H4 -> C57H76Mg1N4O5
557	254.995	14.11	5.23	Putative metabolite	C8H5N3O5S1	1.14	Furazolidone C8H7N3O5 - H2 -> C8H5N3O5 + S1 -> C8H5N3O5S1
558	254.995	14.31	5.07	Putative metabolite	C8H5N3O5S1	1.14	Furazolidone C8H7N3O5 - H2 -> C8H5N3O5 + S1 -> C8H5N3O5S1
567	302.165	7.1	5.9	Putative metabolite	C15H27O4P1	-0.01	7Z,10Z-Hexadecadienoic acid C16H28O2 + H1O3P1 -> C16H29O5P1 - C1H2O1 -> C15H27O4P1
569	153.054	13.56	5.66	Putative metabolite	C6H7N3O2	0.17	(S)-Spinacine C7H9N3O2 - C1H2 -> C6H7N3O2
576	226.032	2.57	5.78	Putative metabolite	C6H10O9	-0.08	{[2,3,4-trihydroxy-5-(hydroxymethyl)oxolan-2-yl]methoxy}sulfonic acid C6H12O9S1 - H2S1 -> C6H10O9
581	372.073	2.64	5.6	Putative metabolite	C11F1H18N2O9P1	0.52	5-Fluorouridine monophosphate C9F1H12N2O9P1 + C2H4 -> C11F1H16N2O9P1 + H2 -> C11F1H18N2O9P1
588	583.348	7.1	5.58	Putative metabolite	C27H54N1O10P1	0.06	Phosphorylcholine C5H14N1O4P1 + C6H10O5 -> C11H24N1O9P1 + C16H30O1 -> C27H54N1O10P1
589	583.348	3.57	4.63	Putative metabolite	C27H54N1O10P1	0.06	Phosphorylcholine C5H14N1O4P1 + C6H10O5 -> C11H24N1O9P1 + C16H30O1 -> C27H54N1O10P1
643	313.298	2.53	5.77	Putative metabolite	C19H39N1O2	-0.38	Nonadecanoic acid C19H38O2 + H1N1 -> C19H39N1O2
652	599.138	2.52	5.62	Putative metabolite	C21H26N7O12P1	0.01	Nicotinamide riboside C11H14N2O5 + O1 -> C11H14N2O6 + C10H12N5O6P1 -> C21H26N7O12P1
661	242.046	2.88	5.56	Putative metabolite	C7H14O7S1	-0.73	Arabinonic acid C5H10O6 + C2H2O1 -> C7H12O7 + H2S1 -> C7H14O7S1
666	115.027	2.75	5.77	Putative metabolite	C4H5N1O3	0.37	Pyroglutamic acid C5H7N1O3 - C1H2 -> C4H5N1O3
670	134.999	2.27	5.8	Putative metabolite	C3H5N1O3S1	0.1	Pyruvatoxime C3H5N1O3 + S1 -> C3H5N1O3S1
671	134.999	2.63	5.8	Putative metabolite	C3H5N1O3S1	0.1	Pyruvatoxime C3H5N1O3 + S1 -> C3H5N1O3S1
688	208.058	12.23	4.98	Putative metabolite	C7H12O7	0.97	Arabinonic acid C5H10O6 + C2H2O1 -> C7H12O7
694	303.053	13.02	5.77	Putative metabolite	C10H13N3O6S1	0.02	glutathione C10H17N3O6S1 - H2 -> C10H15N3O6S1 - H2 -> C10H13N3O6S1
695	303.053	13.51	5.19	Putative metabolite	C10H13N3O6S1	-0.31	glutathione C10H17N3O6S1 - H2 -> C10H15N3O6S1 - H2 -> C10H13N3O6S1
761	449.182	2.79	5.66	Putative metabolite	C19H32N1O9P1	-0.07	Fospropofol C13H21O5P1 + C6H10O5 -> C19H31O10P1 - H-1N-1O1 -> C19H32N1O9P1
771	278.014	7.05	5.74	Putative metabolite	C7H10N4O4S2	0.17	Methazolamide C5H8N4O3S2 + C2H2O1 -> C7H10N4O4S2
824	176.058	5.91	5.72	Putative metabolite	C9H8N2O2	1.01	tryptophan C11H12N2O2 - C2H4 -> C9H8N2O2
826	332.181	13.25	4.52	Putative metabolite	C20H28O2S1	0.3	Retinoic Acid C20H28O2 + S1 -> C20H28O2S1
857	235.072	2.39	5.61	Putative metabolite	C11H11N2O4	1.2	Aminochrome o-semiquinone C8H8N1O2 + H1N1 -> C8H9N2O2 + C2H2O1 -> C10H11N2O3 + C1O1 -> C11H11N2O4
880	312.105	2.96	5.09	Putative metabolite	C16H16N4O1S1	-0.38	Sulfaphenazole C15H14N4O2S1 + C2H4 -> C17H18N4O2S1 - C1H2O1 -> C16H16N4O1S1
886	192.111	6.17	5.67	Putative metabolite	C7H16N2O4	0.04	N-Carboxyethyl-g-aminobutyric acid C7H13N1O4 + H3N1 -> C7H16N2O4
906	243.066	5.93	4.05	Putative metabolite	C11Cl1H14N1O3	-0.32	Lorcaserin sulfamate C11Cl1H14N1O3S1 - S1 -> C11Cl1H14N1O3
914	331.075	11.42	3.9	Putative metabolite	C9H17N1O12	0.23	Melibiose C12H22O11 + C2H2O1 -> C14H24O12 - C5H8 -> C9H16O12 + H1N1 -> C9H17N1O12
916	316.089	2.52	5.27	Putative metabolite	C10H14N5O7	0.39	7-methylguanosine C11H16N5O5 + H2O1 -> C11H18N5O6 + C1O1 -> C12H18N5O7 - C2H4 -> C10H14N5O7
932	381.04	2.93	5.41	Putative metabolite	C9H19N1O11S2	-0.13	3-Deoxy-D-glycero-D-galacto-2-nonulosonic acid C9H16O9 + H3N1O-1 -> C9H19N1O8 + O3S1 -> C9H19N1O11S1 + S1 -> C9H19N1O11S2
937	172.121	4.24	5.47	Putative metabolite	C8H16N2O2	1.03	N-Acetyl-L-leucine C8H15N1O3 - H-1N-1O1 -> C8H16N2O2
938	172.121	3.18	4.71	Putative metabolite	C8H16N2O2	0.45	N-Acetyl-L-leucine C8H15N1O3 - H-1N-1O1 -> C8H16N2O2
942	791.531	4.41	5.57	Putative metabolite	C41H78N1O11P1	0.06	PS(16:0/18:0) C40H78N1O10P1 + C1O1 -> C41H78N1O11P1
944	250.09	3.36	4	Putative metabolite	C16F1H11N2	0.51	Citalopram propionic acid C18F1H14N1O3 - C2H2O1 -> C16F1H12N1O2 - H2O1 -> C16F1H10N1O1 - H-1N-1O1 -> C16F1H11N2
947	325.262	2.44	5.53	Putative metabolite	C19H35N1O3	0.29	N-Lauroylglycine C14H27N1O3 + C5H8 -> C19H35N1O3
964	208.019	2.33	5.49	Putative metabolite	C10H8O3S1	0.55	Methoxsalen C12H8O4 + H2S1 -> C12H10O4S1 - C2H2O1 -> C10H8O3S1
973	149.015	11.26	5.51	Putative metabolite	C4H7N1O3S1	0.43	N-Formyl-L-methionine C6H11N1O3S1 - C2H4 -> C4H7N1O3S1
974	149.015	10.38	4.22	Putative metabolite	C4H7N1O3S1	0.43	N-Formyl-L-methionine C6H11N1O3S1 - C2H4 -> C4H7N1O3S1
992	455.059	2.8	5.31	Putative metabolite	C19F3H16N3O3S2	-0.4	Celecoxib C17F3H14N3O2S1 + C2H2O1 -> C19F3H16N3O3S1 + S1 -> C19F3H16N3O3S2
1005	228.968	10.85	4.88	Putative metabolite	C7H3N1O6S1	1.34	4-Nitrophenyl sulfate C6H5N1O6S1 + C1O1 -> C7H5N1O7S1 - H2O1 -> C7H3N1O6S1
1008	490.332	2.43	5.45	Putative metabolite	C26H50O6S1	0.84	2-Methyl-1-propanethiol C4H10S1 + C6H10O5 -> C10H20O5S1 + C16H30O1 -> C26H50O6S1
1009	335.21	2.68	5.48	Putative metabolite	C19H29N1O4	-0.42	Homocapsaicin C19H29N1O3 + O1 -> C19H29N1O4
1010	335.21	4.2	5.31	Putative metabolite	C19H29N1O4	-0.12	Homocapsaicin C19H29N1O3 + O1 -> C19H29N1O4
1019	303.08	13.27	5.47	Putative metabolite	C8H17N1O11	0.2	Lactosamine C12H23N1O10 - C5H8 -> C7H15N1O10 + C1H2O1 -> C8H17N1O11
1021	303.08	12.79	5.53	Putative metabolite	C8H17N1O11	0.2	Lactosamine C12H23N1O10 - C5H8 -> C7H15N1O10 + C1H2O1 -> C8H17N1O11
1031	375.219	4.22	5.44	Putative metabolite	C17H33N3O4S1	-0.06	Val-Val-Val C15H29N3O4 + C2H4 -> C17H33N3O4 + S1 -> C17H33N3O4S1
1064	304.152	7.09	4.88	Putative metabolite	C14H24O7	-0.32	2-Octenoic acid C8H14O2 + C6H10O5 -> C14H24O7
1065	304.152	7.44	4.88	Putative metabolite	C14H24O7	-0.32	2-Octenoic acid C8H14O2 + C6H10O5 -> C14H24O7
1070	329.078	13.01	5.47	Putative metabolite	C10H19N1O9S1	0.46	Distichonic acid A C10H18N2O8 + H2S1 -> C10H20N2O8S1 + H-1N-1O1 -> C10H19N1O9S1
1074	299.054	2.63	5.23	Putative metabolite	C14H9N3O5	1.41	Cinnavalininate C14H8N2O6 - H-1N-1O1 -> C14H9N3O5
1112	176.105	8.5	5.01	Putative metabolite	C8H16O4	0.9	7-Hydroxyoctanoic acid C8H16O3 + O1 -> C8H16O4
1130	154.003	9.73	5.5	Putative metabolite	C3H7O5P1	0.71	Propionic acid C3H6O2 + H1O3P1 -> C3H7O5P1
1151	150.043	4.2	4.86	Putative metabolite	C7H6N2O2	1.52	(S)-Spinacine C7H9N3O2 - H3N1 -> C7H6N2O2
1175	281.174	7.09	5.41	Putative metabolite	C14H23N3O3	-0.21	Tyrosyl-Valine C14H20N2O4 + H3N1O-1 -> C14H23N3O3
1183	221.032	7.07	5.42	Putative metabolite	C10H7N1O5	0.1	4-Acetyl-2(3H)-benzoxazolone C9H7N1O3 + C1O2 -> C10H7N1O5
1190	280.099	4.87	5.46	Putative metabolite	C12H16N4O2S1	0.34	Histidylproline diketopiperazine C12H16N4O2 + S1 -> C12H16N4O2S1
1193	375.219	2.87	4.97	Putative metabolite	C17H33N3O4S1	0.21	Val-Val-Val C15H29N3O4 + C2H4 -> C17H33N3O4 + S1 -> C17H33N3O4S1
1199	295.127	11.96	5.45	Putative metabolite	C11H21N1O8	-0.28	L-2-Amino-5-hydroxypentanoic acid C5H11N1O3 + C6H10O5 -> C11H21N1O8
1201	488.185	13.88	5.15	Putative metabolite	C17H32N2O14	0.11	N-Acetylneuraminic acid C11H19N1O9 + H3N1 -> C11H22N2O9 + C6H10O5 -> C17H32N2O14
1203	438.257	2.44	5.31	Putative metabolite	C21H43O5P1S1	0.41	LysoPA(0:0/18:1(9Z)) C21H41O7P1 + H2S1 -> C21H43O7P1S1 - C1O2 -> C20H43O5P1S1 - H2O1 -> C20H41O4P1S1 + C1H2O1 -> C21H43O5P1S1
1220	108.044	1.87	4.81	Putative metabolite	C4H4N4	-0.04	hypoxanthine C5H4N4O1 - C1O1 -> C4H4N4
1250	263.1	13	4.65	Putative metabolite	C10H17N1O7	0.39	3-Hydroxy-4-butanolide C10H16O8 - H-1N-1O1 -> C10H17N1O7
1291	355.069	13.95	5.4	Putative metabolite	C10H17N3O9S1	-0.42	Norophthalmic acid C10H17N3O6 + O3S1 -> C10H17N3O9S1
1297	557.333	3.07	5.34	Putative metabolite	C25H52N1O10P1	-0.39	1-Stearoylglycerophosphoserine C24H48N1O9P1 + C1H2O1 -> C25H50N1O10P1 + H2 -> C25H52N1O10P1
1312	240.03	13.47	5.36	Putative metabolite	C7H12O7S1	0.31	2-Methylcitric acid C7H10O7 + H2S1 -> C7H12O7S1
1314	310.16	2.13	5.34	Putative metabolite	C17H26O3S1	-0.43	N-Undecylbenzenesulfonic acid C17H28O3S1 - H2 -> C17H26O3S1
1319	288.086	4.34	5.37	Putative metabolite	C13H12N4O4	0.19	Queuine C12H15N5O3 + C1O1 -> C13H15N5O4 - H3N1 -> C13H12N4O4
1327	819.562	4.38	5.38	Putative metabolite	C43H82N1O11P1	0.18	PS(18:0/18:1(9Z)) C42H80N1O10P1 + C1H2O1 -> C43H82N1O11P1
1349	390.102	2.56	4.92	Putative metabolite	C13H26O9S2	0.06	R-3-(Methylthio)-1-hexanol C7H16O1S1 + O3S1 -> C7H16O4S2 + C6H10O5 -> C13H26O9S2
1364	324.176	2.11	5.33	Putative metabolite	C18H28O3S1	-0.26	2-Dodecylbenzenesulfonic acid C18H30O3S1 - H2 -> C18H28O3S1
1370	460.286	2.49	5.13	Putative metabolite	C24H44O6S1	0.56	3-Hydroxysuberic acid C8H14O5 + S1 -> C8H14O5S1 + C16H30O1 -> C24H44O6S1
1375	223.051	8.79	5.35	Putative metabolite	C7H13N1O5S1	0.19	cystathionine C7H14N2O4S1 + H-1N-1O1 -> C7H13N1O5S1
1378	172.037	10.34	4.77	Putative metabolite	C7H8O5	0.43	N-Acetyl-L-glutamate 5-semialdehyde C7H11N1O4 - H3N1O-1 -> C7H8O5
1379	172.037	11.26	4.44	Putative metabolite	C7H8O5	0.43	N-Acetyl-L-glutamate 5-semialdehyde C7H11N1O4 - H3N1O-1 -> C7H8O5
1380	172.037	10.89	4.42	Putative metabolite	C7H8O5	0.43	N-Acetyl-L-glutamate 5-semialdehyde C7H11N1O4 - H3N1O-1 -> C7H8O5
1384	244.053	7.07	5.36	Putative metabolite	C7H17O5P1S1	0.54	Malaoxon C10H19O7P1S1 - C1O1 -> C9H19O6P1S1 - C2H2O1 -> C7H17O5P1S1
1388	320.141	4.23	5.24	Putative metabolite	C13H24N2O5S1	-0.34	Pantetheine C11H22N2O4S1 + C2H2O1 -> C13H24N2O5S1
1389	320.141	3.09	4.3	Putative metabolite	C13H24N2O5S1	-0.34	Pantetheine C11H22N2O4S1 + C2H2O1 -> C13H24N2O5S1
1390	320.14	3.62	4.25	Putative metabolite	C13H24N2O5S1	0.29	Pantetheine C11H22N2O4S1 + C2H2O1 -> C13H24N2O5S1
1400	176.035	7.17	4.44	Putative metabolite	C9H6N1O3	0.95	Aminochrome o-semiquinone C8H8N1O2 - H2O1 -> C8H6N1O1 + C1O2 -> C9H6N1O3
1401	282.052	14	5.32	Putative metabolite	C8H14N2O7S1	0.25	Cystathionine sulfoxide C7H14N2O5S1 + C1O2 -> C8H14N2O7S1
1404	243.077	2.37	5.25	Putative metabolite	C7H17N1O6S1	0.65	Quinic acid C7H12O6 + H3N1 -> C7H15N1O6 + H2S1 -> C7H17N1O6S1
1405	243.077	4.23	5.16	Putative metabolite	C7H17N1O6S1	1.06	Quinic acid C7H12O6 + H3N1 -> C7H15N1O6 + H2S1 -> C7H17N1O6S1
1406	243.077	3.39	4	Putative metabolite	C10Cl1H14N3O2	0.22	chondroitin sulfate E (GalNAc4,6diS-GlcA) proteoglycan C10Cl1H10N3 + H2O1 -> C10Cl1H12N3O1 + H2O1 -> C10Cl1H14N3O2
1412	159.035	4.22	5.24	Putative metabolite	C6H9N1O2S1	1.25	N-Formyl-L-methionine C6H11N1O3S1 - H2O1 -> C6H9N1O2S1
1414	159.035	4.86	4.78	Putative metabolite	C6H9N1O2S1	0.62	N-Formyl-L-methionine C6H11N1O3S1 - H2O1 -> C6H9N1O2S1
1418	319.084	13.27	5.22	Putative metabolite	C11H17N3O6S1	0.33	N-Ribosylhistidine C11H17N3O6 + S1 -> C11H17N3O6S1
1463	262.105	11.29	4.46	Putative metabolite	C11H18O7	0.58	Iso-Valeraldehyde C5H10O1 + C6H8O6 -> C11H18O7
1472	156.09	4.23	5.1	Putative metabolite	C7H12N2O2	0.5	Dihydrothymine C5H8N2O2 + C2H4 -> C7H12N2O2
1493	319.138	11.3	5.23	Putative metabolite	C12H21N3O7	-0.16	N-(1-Deoxy-1-fructosyl)histidine C12H19N3O7 + H2 -> C12H21N3O7
1514	403.33	2.87	5.23	Putative metabolite	C22H45N1O5	-0.07	Mevalonic acid C6H12O4 + H3N1 -> C6H15N1O4 + C16H30O1 -> C22H45N1O5
1517	387.041	13.52	5.24	Putative metabolite	C10H17N3O9S2	-0.21	glutathione C10H17N3O6S1 + O3S1 -> C10H17N3O9S2
1518	544.265	7.11	5.22	Putative metabolite	C23H45O12P1	0.48	1-tetradecanoyl-sn-glycero-3-phosphate C17H35O7P1 + C6H10O5 -> C23H45O12P1
1522	292.152	7.1	4.65	Putative metabolite	C13H24O7	-0.33	Phaseolic acid C12H22O6 + C1H2O1 -> C13H24O7
1530	197.043	14.19	4.99	Putative metabolite	C7H7N3O4	0.79	Furazolidone C8H7N3O5 - C1O1 -> C7H7N3O4
1534	469.244	7.1	5.17	Putative metabolite	C20H40N1O9P1	0.15	LysoPE(0:0/14:0) C19H40N1O7P1 + C1O2 -> C20H40N1O9P1
1545	374.107	13.69	5.23	Putative metabolite	C13H18N4O9	0.21	5-Acetylamino-6-amino-3-methyluracil C7H10N4O3 + C6H8O6 -> C13H18N4O9
1547	268.204	2.28	5.25	Putative metabolite	C16H28O3	0.17	4-Hydroxy-3-methoxy-2,10-bisaboladien-9-one C16H26O3 + H2 -> C16H28O3
1568	198.029	13.58	5.2	Putative metabolite	C5H11O6P1	0.63	Glycerylphosphorylethanolamine C5H14N1O6P1 - H3N1 -> C5H11O6P1
1569	275.067	7.24	4.79	Putative metabolite	C7H17N1O8S1	0.68	N-Methyl-1-deoxynojirimycin C7H15N1O4 + O3S1 -> C7H15N1O7S1 + H2O1 -> C7H17N1O8S1
1578	310.164	2.83	5.13	Putative metabolite	C14H30O3S2	0.12	2-Hydroxymyristic acid C14H28O3 + S1 -> C14H28O3S1 + H2S1 -> C14H30O3S2
1595	193.06	9.27	5.25	Putative metabolite	C7H7N5O2	0.39	7-Methylguanine C6H7N5O1 + C1O1 -> C7H7N5O2
1602	518.36	2.66	5.11	Putative metabolite	C31H50O6	0.65	Pitheduloside I C30H48O5 + C1H2O1 -> C31H50O6
1603	300.216	7.9	5.25	Putative metabolite	C14H28N4O3	0.14	Isoleucyl-Lysine C12H25N3O3 + C2H2O1 -> C14H27N3O4 - H-1N-1O1 -> C14H28N4O3
1616	158.019	8.88	4.62	Putative metabolite	C10H6S1	0.77	{[(2E)-1-(4-methoxyphenyl)-3-phenylprop-2-en-1-yl]oxy}sulfonic acid C16H16O5S1 - C6H10O5 -> C10H6S1
1647	484.159	3.35	4	Putative metabolite	C26Cl1H29N2O3S1	-0.12	Buclizine C28Cl1H33N2 + O3S1 -> C28Cl1H33N2O3S1 - C2H4 -> C26Cl1H29N2O3S1
1660	495.26	3.07	5.14	Putative metabolite	C22H42N1O9P1	0.04	LysoPE(0:0/16:1(9Z)) C21H42N1O7P1 + C1O2 -> C22H42N1O9P1
1666	652.528	2.52	5.17	Putative metabolite	C39H72O7	-0.3	Rollinecin A C37H68O7 + C2H4 -> C39H72O7
1672	274.08	12.4	3.6	Putative metabolite	C10H14N2O7	0	uridine C9H12N2O6 + C1H2O1 -> C10H14N2O7
1680	304.138	13.83	4.93	Putative metabolite	C11H20N4O6	-0.05	Ophthalmic acid C11H19N3O6 + H1N1 -> C11H20N4O6
1681	304.138	11.87	4.62	Putative metabolite	C11H20N4O6	-0.38	Ophthalmic acid C11H19N3O6 + H1N1 -> C11H20N4O6
1683	440.103	14.16	5.15	Putative metabolite	C14H24N4O8S2	0.13	Cysteine-glutathione disulphide C13H22N4O8S2 + C1H2 -> C14H24N4O8S2
1693	224.072	3.07	5.12	Putative metabolite	C8H16O5S1	0.2	Caprylic acid C8H16O2 + O3S1 -> C8H16O5S1
1722	329.184	2.31	5.1	Putative metabolite	C16H27N1O6	-0.19	(-)-trans-Carveol glucoside C16H26O6 + H1N1 -> C16H27N1O6
1738	261.983	16.09	4.7	Putative metabolite	C5H12O6P2S1	0.31	Dimethylallylpyrophosphate C5H12O7P2 + H2S1 -> C5H14O7P2S1 - H2O1 -> C5H12O6P2S1
1750	482.264	4.23	4.98	Putative metabolite	C22H43O9P1	0.35	Fucose 1-phosphate C6H13O8P1 + C16H30O1 -> C22H43O9P1
1780	162.054	7.59	5.26	Putative metabolite	C7H6N4O1	0.38	Dihydropteridine C6H6N4 + C1O1 -> C7H6N4O1
1781	302.013	2.91	4.87	Putative metabolite	C8H14O8S2	0.36	3-Hydroxysuberic acid C8H14O5 + S1 -> C8H14O5S1 + O3S1 -> C8H14O8S2
1784	271.01	13.59	5.13	Putative metabolite	C7H14N1O4P1S2	-0.05	2,5-Dimethyl-3-(methyldithio)furan C7H10O1S2 + H3N1 -> C7H13N1O1S2 + H1O3P1 -> C7H14N1O4P1S2
1811	302.031	2.95	4.93	Putative metabolite	C8H14O10S1	0.89	{[2,3,4-trihydroxy-5-(hydroxymethyl)oxolan-2-yl]methoxy}sulfonic acid C6H12O9S1 + C2H2O1 -> C8H14O10S1
1817	362.143	11.84	4.79	Putative metabolite	C12H26O12	-0.48	Maltitol C12H24O11 + H2O1 -> C12H26O12
1854	665.115	13.92	5.03	Putative metabolite	C23H25N9O11P2	0.26	Levosimendan C14H12N6O1 + C9H13N3O10P2 -> C23H25N9O11P2
1855	247.082	9.05	4.72	Putative metabolite	C9H9N7O2	-0.52	Azathioprine C9H7N7O2S1 + H2 -> C9H9N7O2S1 - S1 -> C9H9N7O2
1868	308.082	13.49	5.07	Putative metabolite	C15H17O5P1	-0.45	Nabumetone C15H16O2 + H1O3P1 -> C15H17O5P1
1911	296.145	2.14	5.07	Putative metabolite	C16H24O3S1	0.05	Tertatolol C16H25N1O2S1 + H-1N-1O1 -> C16H24O3S1
1916	250.095	7.1	5.05	Putative metabolite	C12H14N2O4	0.23	L-Kynurenine C10H12N2O3 + C2H2O1 -> C12H14N2O4
1921	164.051	3.45	5.13	Putative metabolite	C6H12O3S1	0.7	3-(Methylthio)propyl acetate C6H12O2S1 + O1 -> C6H12O3S1
1928	484.28	4.22	4.89	Putative metabolite	C22H45O9P1	0.66	Fucose 1-phosphate C6H13O8P1 + C16H30O1 -> C22H43O9P1 + H2 -> C22H45O9P1
1941	423.984	2.15	5.07	Putative metabolite	C15H8N2O11S1	1.13	Cinnavalininate C14H8N2O6 + C1O2 -> C15H8N2O8 + O3S1 -> C15H8N2O11S1
1946	484.19	12.97	4.96	Putative metabolite	C18H32N2O13	0.29	N-Carboxyethyl-g-aminobutyric acid C7H13N1O4 + H2O1 -> C7H15N1O5 + C11H17N1O8 -> C18H32N2O13
1956	530.297	7.1	5.03	Putative metabolite	C27F3H41N2O5	0.48	2-hydroxyflutamide C11F3H11N2O4 + C16H30O1 -> C27F3H41N2O5
1961	322.145	4.23	4.91	Putative metabolite	C14H26O6S1	0.65	3-Oxotetradecanoic acid C14H26O3 + O3S1 -> C14H26O6S1
1979	358.114	4.25	4.53	Putative metabolite	C11H23N2O9P1	-0.23	N-(1-Deoxy-1-fructosyl)proline C11H19N1O7 + H1O3P1 -> C11H20N1O10P1 + H3N1O-1 -> C11H23N2O9P1
1991	220.048	7.48	5.07	Putative metabolite	C10H8N2O4	0.48	5-Hydroxyindoleacetylglycine C12H12N2O4 - C2H4 -> C10H8N2O4
1992	220.048	7.08	5.03	Putative metabolite	C10H8N2O4	0.48	5-Hydroxyindoleacetylglycine C12H12N2O4 - C2H4 -> C10H8N2O4
2049	200.045	9.47	5.05	Putative metabolite	C5H13O6P1	0.37	Glycerylphosphorylethanolamine C5H14N1O6P1 - H1N1 -> C5H13O6P1
2062	186.035	2.36	5.03	Putative metabolite	C8H10O3S1	0.35	3-Hydroxyphenylacetic acid C8H8O3 + H2S1 -> C8H10O3S1
2078	345.04	13.91	4.94	Putative metabolite	C8H16N3O8P1S1	-0.08	Phosphoribosylformylglycineamidine C8H16N3O8P1 + S1 -> C8H16N3O8P1S1
2079	518.215	13.89	4.75	Putative metabolite	C27H34O10	0.38	Terretonin C26H32O9 + C1H2O1 -> C27H34O10
2094	338.13	4.23	4.81	Putative metabolite	C16H22N2O4S1	-0.51	Cysteinyl-Tyrosine C12H16N2O4S1 + C5H8 -> C17H24N2O4S1 - C1H2 -> C16H22N2O4S1
2099	378.011	2.94	4.8	Putative metabolite	C10H18O9S3	0.25	2-(Methylthio)ethyl glucosinolate C10H19N1O9S3 - H1N1 -> C10H18O9S3
2103	271.178	2.81	4.96	Putative metabolite	C14H25N1O4	-0.15	N-Decanoylglycine C12H23N1O3 + C2H2O1 -> C14H25N1O4
2121	257.093	13.02	4.95	Putative metabolite	C8H19N1O6S1	0.81	7-Hydroxyoctanoic acid C8H16O3 + O3S1 -> C8H16O6S1 + H3N1 -> C8H19N1O6S1
2123	353.233	7.86	5.03	Putative metabolite	C16H36N1O5P1	-0.26	Sphingosine 1-phosphate (d16:1-P) C16H34N1O5P1 + H2 -> C16H36N1O5P1
2158	510.295	4.23	4.7	Putative metabolite	C24H47O9P1	0.72	1-Stearoylglycerophosphoserine C24H48N1O9P1 - H1N1 -> C24H47O9P1
2159	186.029	7.41	5.01	Putative metabolite	C4H11O6P1	0.13	sn-glycerol-3-phosphate C3H9O6P1 + C1H2 -> C4H11O6P1
2171	311.122	11.25	5	Putative metabolite	C11H21N1O9	-0.22	Galactose-beta-1,4-xylose C11H20O10 - H-1N-1O1 -> C11H21N1O9
2202	256.021	14.44	5.02	Putative metabolite	C4H9N4O7P1	-0.45	Allantoic acid C4H8N4O4 + H1O3P1 -> C4H9N4O7P1
2205	446.324	2.57	4.81	Putative metabolite	C24H46O7	0.12	Stearic acid C18H36O2 + C6H10O5 -> C24H46O7
2209	564.19	14.59	4.02	Putative metabolite	C23H37N2O10P1S1	0.45	Fenamiphos C13H22N1O3P1S1 - C1H2O1 -> C12H20N1O2P1S1 + C11H17N1O8 -> C23H37N2O10P1S1
2211	737.484	3.08	4.95	Putative metabolite	C37H72N1O11P1	-0.14	PS(14:0/16:0) C36H70N1O10P1 + C1H2O1 -> C37H72N1O11P1
2212	737.485	4.52	4.89	Putative metabolite	C37H72N1O11P1	-0.27	PS(14:0/16:0) C36H70N1O10P1 + C1H2O1 -> C37H72N1O11P1
2219	264.073	2.71	4.95	Putative metabolite	C10H10N5O4	1.06	7-methylguanosine C11H16N5O5 - H2 -> C11H14N5O5 - H2 -> C11H12N5O5 - C1H2O1 -> C10H10N5O4
2221	497.168	13.02	4.96	Putative metabolite	C18H31N3O11S1	0.86	Glycyl-Methionine C7H14N2O3S1 + C11H17N1O8 -> C18H31N3O11S1
2227	211.051	11.96	4.97	Putative metabolite	C6H13N1O5S1	1.15	isoleucine C6H13N1O2 + O3S1 -> C6H13N1O5S1
2231	351.226	2.7	4.86	Putative metabolite	C16H33N1O7	-0.28	trans-p-Menthane-1,7,8-triol 8-glucoside C16H30O8 + H3N1O-1 -> C16H33N1O7
2234	377.241	2.77	4.88	Putative metabolite	C18H35N1O7	-0.39	Heptanoylcholine C12H25N1O2 + C6H10O5 -> C18H35N1O7
2241	271.118	12.29	4.99	Putative metabolite	C9H22N1O6P1	0.27	Glycerophosphocholine C8H20N1O6P1 + C1H2 -> C9H22N1O6P1
2242	193.077	11.43	4.99	Putative metabolite	C7H15N1O3S1	0.33	N-Acetyl-L-methionine C7H13N1O3S1 + H2 -> C7H15N1O3S1
2250	432.266	2.97	4.89	Putative metabolite	C21H40N2O5S1	0.45	cystathionine C7H14N2O4S1 - C2H4 -> C5H10N2O4S1 + C16H30O1 -> C21H40N2O5S1
2254	200.127	16.78	4.98	Putative metabolite	C8H16N4O2	0.63	N-Acetyl-L-arginine C8H16N4O3 - O1 -> C8H16N4O2
2261	210.088	16.78	4.73	Putative metabolite	C5H15N4O3P1	-0.11	N-Carbamoylputrescine C5H13N3O1 + H1O3P1 -> C5H14N3O4P1 - H-1N-1O1 -> C5H15N4O3P1
2287	133.02	7.96	4.98	Putative metabolite	C4H7N1O2S1	0.37	trans-S-(1-Propenyl)-L-cysteine C6H11N1O2S1 - C2H4 -> C4H7N1O2S1
2350	363.241	2.59	4.83	Putative metabolite	C21H33N1O4	-0.11	Homocapsaicin C19H29N1O3 + C1H2O1 -> C20H31N1O4 + C1H2 -> C21H33N1O4
2352	154.038	9.62	4.98	Putative metabolite	C6H6N2O3	0.92	4-Nitrophenol C6H5N1O3 + H1N1 -> C6H6N2O3
2369	236.999	13.52	4.88	Putative metabolite	C4H7N5O3S2	0.97	Methazolamide C5H8N4O3S2 + H1N1 -> C5H9N5O3S2 - C1H2 -> C4H7N5O3S2
2378	741.3	7.13	4.88	Putative metabolite	C30H53N3O14P2	-0.03	MG(0:0/16:1(9Z)/0:0) C19H36O4 + C9H13N3O10P2 -> C28H49N3O14P2 + C2H4 -> C30H53N3O14P2
2380	164.992	4.21	4.73	Putative metabolite	C4H7N1O2S2	0.12	S-(Allylthio)-L-cysteine C6H11N1O2S2 - C2H4 -> C4H7N1O2S2
2383	256.142	7.1	4.89	Putative metabolite	C12H20N2O4	0.03	N-Acetylglutamine C7H12N2O4 + C5H8 -> C12H20N2O4
2405	397.223	7.1	4.87	Putative metabolite	C17H36N1O7P1	-0.15	1-tetradecanoyl-sn-glycero-3-phosphate C17H35O7P1 + H1N1 -> C17H36N1O7P1
2412	273.026	14.1	4.47	Putative metabolite	C7H8N5O5P1	0.02	7-Methylguanine C6H7N5O1 + C1O1 -> C7H7N5O2 + H1O3P1 -> C7H8N5O5P1
2417	213.048	7.44	4.95	Putative metabolite	C5H11N1O8	0.31	N-(1-Deoxy-1-fructosyl)threonine C10H19N1O8 - C5H8 -> C5H11N1O8
2418	213.048	8.1	4.22	Putative metabolite	C5H11N1O8	0.31	N-(1-Deoxy-1-fructosyl)threonine C10H19N1O8 - C5H8 -> C5H11N1O8
2420	143.988	7.03	4.9	Putative metabolite	C5H4O3S1	0.1	3-Furoic acid C5H4O3 + S1 -> C5H4O3S1
2421	343.084	13.02	4.84	Putative metabolite	C13H17N3O6S1	-0.27	Zapotidine C7H9N3S1 + C6H8O6 -> C13H17N3O6S1
2422	243.111	13.02	4.91	Putative metabolite	C11H17N1O5	-0.11	Genipinic acid C11H14O6 + H3N1O-1 -> C11H17N1O5
2424	391.083	2.64	4.64	Putative metabolite	C17H17N3O6S1	1.04	2-Amino-a-carboline C11H9N3 + C6H8O6 -> C17H17N3O6 + S1 -> C17H17N3O6S1
2425	137.095	13.62	4.82	Putative metabolite	C7H11N3	0.71	N-Acetylhistamine C7H11N3O1 - O1 -> C7H11N3
2453	122.059	7.71	4	Putative metabolite	C5H6N4	1.2	3-Methylxanthine C6H6N4O2 - C1O2 -> C5H6N4
2473	312.147	16.79	4.85	Putative metabolite	C10H24N4O5S1	0.45	Asparaginyl-Lysine C10H20N4O4 + H2S1 -> C10H22N4O4S1 + H2O1 -> C10H24N4O5S1
2478	291.107	14.02	4.87	Putative metabolite	C10H17N3O7	-0.17	Argininosuccinic acid C10H18N4O6 + H-1N-1O1 -> C10H17N3O7
2483	274.017	14.16	4.89	Putative metabolite	C9H11N2O4P1S1	0.78	tryptophan C11H12N2O2 + H1O3P1 -> C11H13N2O5P1 - C2H2O1 -> C9H11N2O4P1 + S1 -> C9H11N2O4P1S1
2487	434.324	2.79	4.78	Putative metabolite	C23H46O7	0.12	(R)-3-Hydroxy-Octadecanoic acid C18H36O3 + C6H10O5 -> C24H46O8 - C1O1 -> C23H46O7
2492	255.059	8.11	4.85	Putative metabolite	C7H13N1O9	0.12	3-Deoxy-D-glycero-D-galacto-2-nonulosonic acid C9H16O9 + H1N1 -> C9H17N1O9 - C2H4 -> C7H13N1O9
2499	268.061	13.01	4.88	Putative metabolite	C9H16O7S1	1.02	Cibulins C3H8O1S1 + C6H8O6 -> C9H16O7S1
2517	726.432	7.07	4.77	Putative metabolite	C36H71O8P1S2	0.68	LysoPA(0:0/18:1(9Z)) C21H41O7P1 + H2S1 -> C21H43O7P1S1 - C1O2 -> C20H43O5P1S1 - H2O1 -> C20H41O4P1S1 + O3S1 -> C20H41O7P1S2 + C16H30O1 -> C36H71O8P1S2
2522	316.225	8.79	3.88	Putative metabolite	C17H32O5	-0.08	(S)-10,16-Dihydroxyhexadecanoic acid C16H32O4 + C1O1 -> C17H32O5
2531	320.195	2.62	4.76	Putative metabolite	C14H28N2O6	0.11	Pimelylcarnitine C14H25N1O6 + H3N1 -> C14H28N2O6
2537	377.231	4.23	4.61	Putative metabolite	C20H31N3O4	-0.12	Lysyl-Tyrosine C15H23N3O4 + C5H8 -> C20H31N3O4
2547	256.077	2.16	4.85	Putative metabolite	C12H16O4S1	0.12	Monoisobutyl phthalic acid C12H14O4 + H2S1 -> C12H16O4S1
2562	296.001	16.38	3.74	Putative metabolite	C13Cl1H10O4P1	-0.26	Chlorohydrin C13Cl1H9O1 + H1O3P1 -> C13Cl1H10O4P1
2572	557.126	14.19	4.82	Putative metabolite	C18H28N3O15P1	-0.53	Cytidine monophosphate N-acetylneuraminic acid C20H31N4O16P1 - H1N1 -> C20H30N3O16P1 - C2H2O1 -> C18H28N3O15P1
2580	248.162	2.72	4.8	Putative metabolite	C12H24O5	0.3	Dodecanedioic acid C12H22O4 + H2O1 -> C12H24O5
2581	248.162	3.65	4.5	Putative metabolite	C12H24O5	0.3	Dodecanedioic acid C12H22O4 + H2O1 -> C12H24O5
2584	622.186	14.2	4.66	Putative metabolite	C24H34N2O17	0.4	2-Furoylglycine C7H7N1O4 + C6H10O5 -> C13H17N1O9 + C11H17N1O8 -> C24H34N2O17
2590	323.025	3.08	4.83	Putative metabolite	C17H9N1O4S1	-0.22	Cepharadione A C18H11N1O4 - H2 -> C18H9N1O4 - C1H2 -> C17H7N1O4 + H2S1 -> C17H9N1O4S1
2593	224.064	10.17	4.81	Putative metabolite	C6H12N2O7	0.23	Cycasin C8H16N2O7 - C2H4 -> C6H12N2O7
2594	224.064	9.53	4.44	Putative metabolite	C6H12N2O7	0.23	Cycasin C8H16N2O7 - C2H4 -> C6H12N2O7
2597	211.072	2.23	5.02	Putative metabolite	C9H11N2O4	1.34	Aminochrome o-semiquinone C8H8N1O2 + H-1N-1O1 -> C8H7O3 + H3N1 -> C8H10N1O3 - H-1N-1O1 -> C8H11N2O2 + C1O2 -> C9H11N2O4
2603	282.15	2.16	4.66	Putative metabolite	C12H26O5S1	-0.02	Heptadecanoic acid C17H34O2 + O3S1 -> C17H34O5S1 - C5H8 -> C12H26O5S1
2619	267.996	2.67	4.65	Putative metabolite	C7H12N2O4Se1	0.48	Selenocystathionine C7H14N2O4Se1 - H2 -> C7H12N2O4Se1
2625	217.043	13.31	4.53	Putative metabolite	C4H11N1O9	-0.55	Galactose-beta-1,4-xylose C11H20O10 + H1N1 -> C11H21N1O10 - C5H8 -> C6H13N1O10 - C2H2O1 -> C4H11N1O9
2626	206.115	7.1	4.49	Putative metabolite	C9H18O5	0.6	3-Hydroxytetradecanedioic acid C14H26O5 - C5H8 -> C9H18O5
2637	374.144	16.87	4.41	Putative metabolite	C14H22N4O8	-0.36	Glycyl-Histidine C8H12N4O3 + C6H10O5 -> C14H22N4O8
2639	374.144	3.11	4.41	Putative metabolite	C14H22N4O8	-0.36	Glycyl-Histidine C8H12N4O3 + C6H10O5 -> C14H22N4O8
2641	188.009	13.88	4.73	Putative metabolite	C3H9O7P1	-0.06	sn-glycerol-3-phosphate C3H9O6P1 + O1 -> C3H9O7P1
2646	394.116	14.2	4.82	Putative metabolite	C13H22N4O8S1	-0.42	Cysteine-glutathione disulphide C13H22N4O8S2 - S1 -> C13H22N4O8S1
2648	202.056	11.46	4.82	Putative metabolite	C11H10N2S1	-0.15	6-Methoxy-3-(2-thiazolyl)-1H-indole C12H10N2O1S1 - C1O1 -> C11H10N2S1
2668	359.304	2.81	4.7	Putative metabolite	C20H41N1O4	-0.39	10,20-Dihydroxyeicosanoic acid C20H40O4 + H1N1 -> C20H41N1O4
2670	382.039	2.93	4.6	Putative metabolite	C13H18O9S2	-0.46	{[1-(4-methoxyphenyl)-4-methyl-3-oxopentyl]oxy}sulfonic acid C13H18O6S1 + O3S1 -> C13H18O9S2
2676	165.01	7.07	4.6	Putative metabolite	C4H7N1O4S1	0.48	aspartate C4H7N1O4 + S1 -> C4H7N1O4S1
2693	161.945	13.78	4.47	Putative metabolite	C4H2O3S2	-0.4	4-Mercapto-5-methyl-3(2H)-thiophenone C5H6O1S2 + C1O2 -> C6H6O3S2 - C2H4 -> C4H2O3S2
2704	218.996	2.65	4.41	Putative metabolite	C3H10N1O6P1S1	1.12	D-phospho-L-serine C3H8N1O6P1 + H2S1 -> C3H10N1O6P1S1
2716	331.197	14.4	4.79	Putative metabolite	C20H29N1O1S1	0.26	Retinoic Acid C20H28O2 + S1 -> C20H28O2S1 - H-1N-1O1 -> C20H29N1O1S1
2724	408.131	14.25	4.76	Putative metabolite	C14H24N4O8S1	0.21	Glycyl-Histidine C8H12N4O3 + H2S1 -> C8H14N4O3S1 + C6H10O5 -> C14H24N4O8S1
2727	254.137	4.52	4.82	Putative metabolite	C10H22O7	0.21	Hexaethylene glycol C12H26O7 - C2H4 -> C10H22O7
2737	311.246	2.28	4.76	Putative metabolite	C18H33N1O3	-0.5	4-Hydroxy-3-methoxy-2,10-bisaboladien-9-one C16H26O3 + H3N1 -> C16H29N1O3 + C2H4 -> C18H33N1O3
2744	322.072	13.01	4.64	Putative metabolite	C15Cl1H15N2O4	0.11	Tolfenamic acid C14Cl1H12N1O2 + C1O2 -> C15Cl1H12N1O4 + H3N1 -> C15Cl1H15N2O4
2759	246.133	12.61	4.83	Putative metabolite	C9H18N4O4	0.43	N-Acetyl-L-arginine C8H16N4O3 + C1H2O1 -> C9H18N4O4
2764	323.063	13.01	4.82	Putative metabolite	C15F1H14N1O4S1	0.18	Flurbiprofen C15F1H13O2 + O3S1 -> C15F1H13O5S1 - H-1N-1O1 -> C15F1H14N1O4S1
2776	187.096	7.09	4.8	Putative metabolite	C7H13N3O3	0.49	N-Acetylglutamine C7H12N2O4 - H-1N-1O1 -> C7H13N3O3
2779	377.126	13	4.69	Putative metabolite	C14H23N3O7S1	-0.08	Tyrosyl-Valine C14H20N2O4 + O3S1 -> C14H20N2O7S1 + H3N1 -> C14H23N3O7S1
2780	227.056	13.58	4.71	Putative metabolite	C6H14N1O6P1	0.32	(2R,3R,4R)-2-Amino-4-hydroxy-3-methylpentanoic acid C6H13N1O3 + H1O3P1 -> C6H14N1O6P1
2788	163.947	2.6	4.61	Putative metabolite	Br1C4H5O2	1.17	3-Bromosulfolane Br1C4H7O2S1 - H2S1 -> Br1C4H5O2
2789	281.992	13.83	4.62	Putative metabolite	C3H11N2O9P1S1	-0.05	D-phospho-L-serine C3H8N1O6P1 + H2O1 -> C3H10N1O7P1 + O3S1 -> C3H10N1O10P1S1 - H-1N-1O1 -> C3H11N2O9P1S1
2790	281.068	13.96	4.74	Putative metabolite	C8H15N3O6S1	0.2	Asparaginyl-Aspartic acid C8H13N3O6 + H2S1 -> C8H15N3O6S1
2791	391.141	12.33	4.25	Putative metabolite	C15H25N3O7S1	-0.2	Lysyl-Tyrosine C15H23N3O4 + O3S1 -> C15H23N3O7S1 + H2 -> C15H25N3O7S1
2792	334.236	2.76	4.59	Putative metabolite	C17H34O6	-0.18	(S)-10,16-Dihydroxyhexadecanoic acid C16H32O4 + C1O1 -> C17H32O5 + H2O1 -> C17H34O6
2795	321.063	13.7	4.73	Putative metabolite	C10H15N3O7S1	0.22	S-Formylglutathione C11H17N3O7S1 - C1H2 -> C10H15N3O7S1
2819	283.127	12.1	4.28	Putative metabolite	C10H21N1O8	-0.29	Arabinopyranobiose C10H18O9 + H3N1O-1 -> C10H21N1O8
2830	793.547	4.45	4.78	Putative metabolite	C41H80N1O11P1	-0.38	PS(16:0/18:0) C40H78N1O10P1 + C1H2O1 -> C41H80N1O11P1
2831	365.195	7.1	4.81	Putative metabolite	C18H27N3O5	0.19	Isoleucyl-Tryptophan C17H23N3O3 + H2O1 -> C17H25N3O4 + C1H2O1 -> C18H27N3O5
2832	320.097	7.99	4.59	Putative metabolite	C10H16N4O8	0.04	Vicine C10H16N4O7 + O1 -> C10H16N4O8
2835	318.106	13.78	4.76	Putative metabolite	C12H18N2O8	0.05	N-(1-Deoxy-1-fructosyl)histidine C12H19N3O7 + H-1N-1O1 -> C12H18N2O8
2838	295.251	2.82	4.68	Putative metabolite	C18H33N1O2	0.44	Linoleic acid C18H32O2 + H1N1 -> C18H33N1O2
2845	460.177	13.37	4.72	Putative metabolite	C21H32O9S1	-0.21	N-Undecylbenzenesulfonic acid C17H28O3S1 - C2H4 -> C15H24O3S1 + C6H8O6 -> C21H32O9S1
2859	337.058	13.68	4.78	Putative metabolite	C10H15N3O8S1	-0.34	5-Methylcytidine C10H15N3O5 + O3S1 -> C10H15N3O8S1
2870	512.19	2.35	4.67	Putative metabolite	C28Cl1H33N2O3S1	0.28	Buclizine C28Cl1H33N2 + O3S1 -> C28Cl1H33N2O3S1
2883	201.01	3.72	4.77	Putative metabolite	C7H7N1O4S1	0.39	2-Furoylglycine C7H7N1O4 + S1 -> C7H7N1O4S1
2894	214.107	9.7	4.75	Putative metabolite	C8H14N4O3	0.42	2-(3-Carboxy-3-aminopropyl)-L-histidine C10H16N4O4 - C2H2O1 -> C8H14N4O3
2895	214.107	9.99	4.75	Putative metabolite	C8H14N4O3	-0.05	2-(3-Carboxy-3-aminopropyl)-L-histidine C10H16N4O4 - C2H2O1 -> C8H14N4O3
2898	172.037	11.7	4.52	Putative metabolite	C7H8O5	0.43	N-Acetyl-L-glutamate 5-semialdehyde C7H11N1O4 - H3N1O-1 -> C7H8O5
2909	385.104	13.03	4.71	Putative metabolite	C13H23N1O10S1	0.43	Dimethyl sulfone C2H6O2S1 + C11H17N1O8 -> C13H23N1O10S1
2919	214.971	13	4.18	Putative metabolite	C7H5N1O3S2	0.39	4-Hydroxybenzyl isothiocyanate C8H7N1O1S1 + O3S1 -> C8H7N1O4S2 - C1H2O1 -> C7H5N1O3S2
2946	269.093	13.89	4.43	Putative metabolite	C9H19N1O6S1	0.03	pantothenate C9H17N1O5 + H2S1 -> C9H19N1O5S1 + O1 -> C9H19N1O6S1
2969	284.105	14.98	4.34	Putative metabolite	C10H16N6O2S1	0.51	5'-Methylthioadenosine C11H15N5O3S1 - C1O1 -> C10H15N5O2S1 + H1N1 -> C10H16N6O2S1
2981	266.14	7.08	4.75	Putative metabolite	C10H23N2O4P1	-0.59	Phosphorylcholine C5H14N1O4P1 + H1N1 -> C5H15N2O4P1 + C5H8 -> C10H23N2O4P1
2994	358.117	11.16	4.74	Putative metabolite	C18H18N2O6	-0.32	Dityrosine C18H20N2O6 - H2 -> C18H18N2O6
2995	358.117	9.21	4.41	Putative metabolite	C18H18N2O6	-0.32	Dityrosine C18H20N2O6 - H2 -> C18H18N2O6
2996	358.117	12.82	4.12	Putative metabolite	C18H18N2O6	-0.6	Dityrosine C18H20N2O6 - H2 -> C18H18N2O6
3001	280.153	8.16	4.76	Putative metabolite	C13H20N4O3	0.5	Glycyl-Histidine C8H12N4O3 + C5H8 -> C13H20N4O3
3033	228.184	3.06	4.66	Putative metabolite	C12H24N2O2	-0.1	N-Decanoylglycine C12H23N1O3 - H-1N-1O1 -> C12H24N2O2
3039	257.057	10.54	4.74	Putative metabolite	C7H15N1O7S1	0.87	N-Methyl-1-deoxynojirimycin C7H15N1O4 + O3S1 -> C7H15N1O7S1
3045	334.179	2.07	4.63	Putative metabolite	C20H22N4O1	0.78	Nevirapine C15H14N4O1 + C5H8 -> C20H22N4O1
3049	363.128	13.4	4.67	Putative metabolite	C13H21N3O9	-0.06	N-(1-Deoxy-1-fructosyl)histidine C12H19N3O7 + H2 -> C12H21N3O7 + C1O2 -> C13H21N3O9
3056	597.364	3.07	4.72	Putative metabolite	C28H56N1O10P1	0.31	PS(18:0/20:0) C44H86N1O10P1 - C16H30O1 -> C28H56N1O9P1 + O1 -> C28H56N1O10P1
3070	297.124	13.01	4.5	Putative metabolite	C13H20N3O3P1	-0.24	Lamivudine-monophosphate C8H12N3O6P1S1 + C5H8 -> C13H20N3O6P1S1 - O3S1 -> C13H20N3O3P1
3077	211.026	13.64	4.68	Putative metabolite	C4H9N3O5S1	1.38	asparagine C4H8N2O3 + O3S1 -> C4H8N2O6S1 - H-1N-1O1 -> C4H9N3O5S1
3081	295.02	13.11	4.6	Putative metabolite	C7H10N3O8P1	0.85	CMP C9H14N3O8P1 - C2H4 -> C7H10N3O8P1
3090	317.105	12.71	3.86	Putative metabolite	C12H19N3O5S1	-0.18	2-S-cysteinyl-DOPA C12H16N2O6S1 + H3N1O-1 -> C12H19N3O5S1
3096	298.047	13.97	4.67	Putative metabolite	C8H14N2O8S1	0.29	Glutamylalanine C8H14N2O5 + O3S1 -> C8H14N2O8S1
3121	228.073	2.85	4.45	Putative metabolite	C7H10N5O4	-0.53	7-methylguanosine C11H16N5O5 - C2H4 -> C9H12N5O5 - C2H2O1 -> C7H10N5O4
3126	297.142	11.21	4.62	Putative metabolite	C11H23N1O8	0.22	Lactosamine C12H23N1O10 - C1O2 -> C11H23N1O8
3127	297.142	11.87	4.4	Putative metabolite	C11H23N1O8	0.22	Lactosamine C12H23N1O10 - C1O2 -> C11H23N1O8
3134	320.079	13.8	4.67	Putative metabolite	C10H16N4O6S1	0.17	glutathione C10H17N3O6S1 + H1N1 -> C10H18N4O6S1 - H2 -> C10H16N4O6S1
3137	304.146	2.99	4.54	Putative metabolite	C13H24N2O4S1	-0.07	Methionyl-Serine C8H16N2O4S1 + C5H8 -> C13H24N2O4S1
3138	304.146	4.67	4.06	Putative metabolite	C13H24N2O4S1	-0.07	Methionyl-Serine C8H16N2O4S1 + C5H8 -> C13H24N2O4S1
3161	204.987	13.49	4.38	Putative metabolite	C6H7N1O3S2	-0.32	4-Methyl-5-vinylthiazole C6H7N1S1 + O3S1 -> C6H7N1O3S2
3163	186.978	13.01	4.62	Putative metabolite	C5Cl1H2N3O3	0.37	8-Chloroxanthine C5Cl1H3N4O2 + H-1N-1O1 -> C5Cl1H2N3O3
3166	329.097	8.06	4.05	Putative metabolite	C17F2H13N3O2	0.86	Sarafloxacin C20F2H17N3O3 - C2H2O1 -> C18F2H15N3O2 - C1H2 -> C17F2H13N3O2
3179	709.453	3.06	4.68	Putative metabolite	C35H68N1O11P1	-0.57	PS(14:0/16:0) C36H70N1O10P1 + C1H2O1 -> C37H72N1O11P1 - C2H4 -> C35H68N1O11P1
3183	146.999	7.57	4.69	Putative metabolite	C4H5N1O3S1	0.09	N-Nitrosothiazolidine-4-carboxylic acid C4H6N2O3S1 - H1N1 -> C4H5N1O3S1
3186	318.035	14.03	4.67	Putative metabolite	C8H15O11P1	-0.01	3,4,5-trihydroxy-6-(2-hydroxyethoxy)oxane-2-carboxylic acid C8H14O8 + H1O3P1 -> C8H15O11P1
3219	372.201	11.24	4.67	Putative metabolite	C16H28N4O6	-0.04	Ophthalmic acid C11H19N3O6 + H1N1 -> C11H20N4O6 + C5H8 -> C16H28N4O6
3227	286.128	13.24	4.66	Putative metabolite	C11H18N4O5	0.07	2-(3-Carboxy-3-aminopropyl)-L-histidine C10H16N4O4 + C1H2O1 -> C11H18N4O5
3244	460.146	13.01	4.46	Putative metabolite	C15H29N2O12P1	-0.41	Phosphodimethylethanolamine C4H12N1O4P1 + C11H17N1O8 -> C15H29N2O12P1
3251	204.053	5.6	4.32	Putative metabolite	C10H8N2O3	0.45	Kynurenic acid C10H7N1O3 + H1N1 -> C10H8N2O3
3252	350.176	2.81	4.54	Putative metabolite	C16H30O6S1	0.31	3-Oxohexadecanoic acid C16H30O3 + O3S1 -> C16H30O6S1
3260	270.052	12.96	4.66	Putative metabolite	C7H14N2O7S1	-0.11	Diaminopimelic acid C7H14N2O4 + O3S1 -> C7H14N2O7S1
3272	709.453	4.57	4.62	Putative metabolite	C35H68N1O11P1	-0.43	PS(14:0/16:0) C36H70N1O10P1 + C1H2O1 -> C37H72N1O11P1 - C2H4 -> C35H68N1O11P1
3286	325.202	8.52	4.68	Putative metabolite	C14H32N1O5P1	0.03	Sphingosine 1-phosphate (d16:1-P) C16H34N1O5P1 + H2 -> C16H36N1O5P1 - C2H4 -> C14H32N1O5P1
3288	382.197	11.61	4.67	Putative metabolite	C16H26N6O5	-0.08	Valganciclovir C14H22N6O5 + C2H4 -> C16H26N6O5
3293	473.102	12.98	4.27	Putative metabolite	C15H23N1O16	-0.46	6-[(2-carboxyacetyl)oxy]-3,4,5-trihydroxyoxane-2-carboxylic acid C9H12O10 + H3N1 -> C9H15N1O10 + C6H8O6 -> C15H23N1O16
3303	251.043	3.73	4.67	Putative metabolite	C11H9N1O6	0.35	4-Acetyl-2(3H)-benzoxazolone C9H7N1O3 + C1O2 -> C10H7N1O5 + C1H2O1 -> C11H9N1O6
3312	404.072	13.99	4.64	Putative metabolite	C12H21O13P1	0.19	trehalose-6-Phosphate C12H23O14P1 - H2O1 -> C12H21O13P1
3313	291.134	2.14	4.44	Putative metabolite	C15H19N2O4	0.63	3,5,6,7-tetrahydroxy-2-(4-hydroxy-3-methoxyphenyl)-8aH-chromen-8a-yl C16H13O7 + H3N1O-1 -> C16H16N1O6 + H3N1O-1 -> C16H19N2O5 - C1O1 -> C15H19N2O4
3341	384.101	7.06	4.55	Putative metabolite	C14H25O8P1S1	-0.59	Malaoxon C10H19O7P1S1 + C2H4 -> C12H23O7P1S1 + C2H2O1 -> C14H25O8P1S1
3346	182.993	13.89	4.46	Putative metabolite	C3H6N1O6P1	-0.15	Pyruvatoxime C3H5N1O3 + H1O3P1 -> C3H6N1O6P1
3352	251.014	13.4	4.33	Putative metabolite	C5H9N5O3S2	1.12	Methazolamide C5H8N4O3S2 + H1N1 -> C5H9N5O3S2
3361	311.159	11.79	4.66	Putative metabolite	C13H21N5O4	-0.15	Histidinyl-Lysine C12H21N5O3 + C1O1 -> C13H21N5O4
3365	271.153	11.4	4.63	Putative metabolite	C12H21N3O4	0.39	Alanyl-Asparagine C7H13N3O4 + C5H8 -> C12H21N3O4
3373	289.175	14.47	4.56	Putative metabolite	C11H23N5O4	0.01	Arginyl-Threonine C10H21N5O4 + C1H2 -> C11H23N5O4
3381	233.028	10.84	4.56	Putative metabolite	C9Cl1H12N1O2S1	0.97	Lorcaserin sulfamate C11Cl1H14N1O3S1 - C2H2O1 -> C9Cl1H12N1O2S1
3382	450.183	2.8	4.92	Putative metabolite	C22H30N2O6S1	-0.32	Thenyldiamine C14H19N3S1 - H3N1O-1 -> C14H16N2O1S1 + C6H10O5 -> C20H26N2O6S1 + C2H4 -> C22H30N2O6S1
3386	375.164	11.42	4.62	Putative metabolite	C15H25N3O8	-0.09	5-Methylcytidine C10H15N3O5 - C1O2 -> C9H15N3O3 + C6H10O5 -> C15H25N3O8
3387	375.164	11.76	4.62	Putative metabolite	C15H25N3O8	-0.36	5-Methylcytidine C10H15N3O5 - C1O2 -> C9H15N3O3 + C6H10O5 -> C15H25N3O8
3399	525.297	7.1	4.55	Putative metabolite	C24H47N1O9S1	1.05	Octadecanedioic acid C18H34O4 + H3N1 -> C18H37N1O4 + S1 -> C18H37N1O4S1 + C6H10O5 -> C24H47N1O9S1
3406	402.112	7.11	4.34	Putative metabolite	C12H22N2O13	0.72	2-Amino-3,4-dihydroxypentanedioic acid C5H9N1O6 + C6H8O6 -> C11H17N1O12 + H3N1 -> C11H20N2O12 + C1H2O1 -> C12H22N2O13
3411	179.022	4.15	4.55	Putative metabolite	C8H5N1O4	0.88	5,6-Dihydroxyindole-2-carboxylic acid C9H7N1O4 - C1H2 -> C8H5N1O4
3413	282.115	15.42	4.64	Putative metabolite	C12H18N4O2S1	0.17	Histidylproline diketopiperazine C12H16N4O2 + H2S1 -> C12H18N4O2S1
3421	290.148	14.14	4.58	Putative metabolite	C12H22N2O6	-0.05	Saccharopine C11H20N2O6 + C1H2 -> C12H22N2O6
3427	191.044	7.26	4.66	Putative metabolite	C7H5N5O2	0.13	Pterin C6H5N5O1 + C1O1 -> C7H5N5O2
3436	250.03	2.91	4.56	Putative metabolite	C12H10O4S1	0.72	Methoxsalen C12H8O4 + H2S1 -> C12H10O4S1
3438	211.023	11.19	4.27	Putative metabolite	C7H5N3O5	0.57	Furazolidone C8H7N3O5 - C1H2 -> C7H5N3O5
3439	417.186	13.16	4.52	Putative metabolite	C16H27N5O8	-0.09	2-Amino-4-oxo-4-alpha-hydroxy-6-(erythro-1',2',3'-trihydroxypropyl)-5,6,7,8-tetrahydroxypterin C9H15N5O8 + C5H8 -> C14H23N5O8 + C2H4 -> C16H27N5O8
3440	372.201	14.43	4.54	Putative metabolite	C16H28N4O6	0.23	Ophthalmic acid C11H19N3O6 + H1N1 -> C11H20N4O6 + C5H8 -> C16H28N4O6
3448	307.003	11.3	4.61	Putative metabolite	C8H10N3O6P1S1	-0.02	Lamivudine-monophosphate C8H12N3O6P1S1 - H2 -> C8H10N3O6P1S1
3449	225.004	2.23	4.52	Putative metabolite	C5H8N1O7P1	-0.28	2-Keto-glutaramic acid C5H7N1O4 + H1O3P1 -> C5H8N1O7P1
3452	344.07	7.12	4.59	Putative metabolite	C11H21O8P1S1	-0.07	Malaoxon C10H19O7P1S1 + C1H2O1 -> C11H21O8P1S1
3475	251.088	2.34	4.42	Putative metabolite	C9F3H12N3O2	-0.15	2-hydroxyflutamide C11F3H11N2O4 - C2H2O1 -> C9F3H9N2O3 + H3N1O-1 -> C9F3H12N3O2
3478	371.088	3.09	4.16	Putative metabolite	C12H21N1O10S1	0.58	N-Formyl-L-methionine C6H11N1O3S1 + C6H8O6 -> C12H19N1O9S1 + H2O1 -> C12H21N1O10S1
3485	339.021	3.08	4.5	Putative metabolite	C7H18N1O8P1S2	0.13	D-glucosamine-1/6-phosphate C6H14N1O8P1 + C1H2 -> C7H16N1O8P1 + H2S1 -> C7H18N1O8P1S1 + S1 -> C7H18N1O8P1S2
3489	199.046	11.97	4.28	Putative metabolite	C12H9N1S1	-0.15	1-Methyl-3-(2-thiazolyl)-1H-indole C12H10N2S1 - H1N1 -> C12H9N1S1
3494	358.123	11.8	4.62	Putative metabolite	C11H22N2O11	-0.39	N-carbamoyl-L-aspartate C5H8N2O5 + H2O1 -> C5H10N2O6 + C6H10O5 -> C11H20N2O11 + H2 -> C11H22N2O11
3495	358.122	11.25	4.29	Putative metabolite	C11H22N2O11	0.17	N-carbamoyl-L-aspartate C5H8N2O5 + H2O1 -> C5H10N2O6 + C6H10O5 -> C11H20N2O11 + H2 -> C11H22N2O11
3504	372.207	7.04	4.57	Putative metabolite	C19H33O5P1	-0.64	8,11,14-Eicosatrienoic acid C20H34O2 + H1O3P1 -> C20H35O5P1 - C1H2 -> C19H33O5P1
3506	358.258	11.72	4.6	Putative metabolite	C17H34N4O4	-0.26	Val-Val-Val C15H29N3O4 + C2H4 -> C17H33N3O4 + H1N1 -> C17H34N4O4
3512	169.02	4.11	4.46	Putative metabolite	C7H7N1O2S1	0.29	2-(4-Methyl-5-thiazolyl)ethyl formate C7H9N1O2S1 - H2 -> C7H7N1O2S1
3521	192.038	10.85	4.6	Putative metabolite	C5H8N2O6	0.19	L-alpha-glutamyl-L-hydroxyproline C10H16N2O6 - C5H8 -> C5H8N2O6
3530	364.105	13.59	4.3	Putative metabolite	C12H20N4O7S1	-0.36	Zanamivir C12H20N4O7 + S1 -> C12H20N4O7S1
3536	107.025	13.39	4.4	Putative metabolite	C5H3N2O1	0.35	Aminochrome o-semiquinone C8H8N1O2 + H1N1 -> C8H9N2O2 - C1H2O1 -> C7H7N2O1 - C2H4 -> C5H3N2O1
3538	158.105	16.24	4.62	Putative metabolite	C7H14N2O2	1.44	N6-Acetyl-L-lysine C8H16N2O3 - C1H2O1 -> C7H14N2O2
3540	362.005	7.6	4.5	Putative metabolite	C11H10N2O10S1	0.32	Orotidine C10H12N2O8 + S1 -> C10H12N2O8S1 - H2 -> C10H10N2O8S1 + C1O2 -> C11H10N2O10S1
3567	195.996	2.06	4.49	Putative metabolite	C5H9O4P1S1	0.59	2-Methyl-2-(methyldithio)propanal C5H10O1S2 + H1O3P1 -> C5H11O4P1S2 - H2S1 -> C5H9O4P1S1
3578	243.083	2.39	4.78	Putative metabolite	C13H13N3S1	1.31	1-Methyl-3-(2-thiazolyl)-1H-indole C12H10N2S1 + C1H2 -> C13H12N2S1 + H1N1 -> C13H13N3S1
3580	433.107	11.93	4.51	Putative metabolite	C13H23N1O15	0.39	2,3,4,5,6,7-Hexahydroxyheptanoic acid C7H14O8 + O1 -> C7H14O9 + H1N1 -> C7H15N1O9 + C6H8O6 -> C13H23N1O15
3585	231.053	13.65	4.48	Putative metabolite	C12H9N1O4	0.68	Methoxsalen C12H8O4 + H1N1 -> C12H9N1O4
3592	726.432	3.07	4.4	Putative metabolite	C38H58N6O8	-0.4	Dihydrofolic acid C19H21N7O6 - H3N1 -> C19H18N6O6 + C1H2 -> C20H20N6O6 + H2O1 -> C20H22N6O7 + H2 -> C20H24N6O7 + C2H4 -> C22H28N6O7 + C16H30O1 -> C38H58N6O8
3597	443.157	16.93	4.05	Putative metabolite	C15H29N3O10S1	0.6	N-Acetylcystathionine C9H16N2O5S1 + C6H10O5 -> C15H26N2O10S1 + H3N1 -> C15H29N3O10S1
3598	443.157	16.26	4.02	Putative metabolite	C15H29N3O10S1	0.6	N-Acetylcystathionine C9H16N2O5S1 + C6H10O5 -> C15H26N2O10S1 + H3N1 -> C15H29N3O10S1
3602	346.095	14.16	4.29	Putative metabolite	C12H18N4O6S1	0.01	Aspartyl-Histidine C10H14N4O5 + C2H2O1 -> C12H16N4O6 + H2S1 -> C12H18N4O6S1
3603	270.125	16.25	4.58	Putative metabolite	C9H22N2O5S1	0.9	Meprobamate C9H18N2O4 + H2S1 -> C9H20N2O4S1 + H2O1 -> C9H22N2O5S1
3607	298.07	3.67	4.49	Putative metabolite	C14H10N4O4	0.35	Cinnavalininate C14H8N2O6 - H-1N-1O1 -> C14H9N3O5 - H-1N-1O1 -> C14H10N4O4
3612	258.077	9.78	3.73	Putative metabolite	C8H18O7S1	0.48	Galactitol C6H14O6 + C2H2O1 -> C8H16O7 + H2S1 -> C8H18O7S1
3615	242.082	5.82	4.59	Putative metabolite	C8H18O6S1	0.04	Ethyl beta-D-glucopyranoside C8H16O6 + H2S1 -> C8H18O6S1
3622	198.028	13.24	5.2	Putative metabolite	C7H6N2O5	0.86	Orotic acid C5H4N2O4 + C2H2O1 -> C7H6N2O5
3628	713.269	7.3	4.54	Putative metabolite	C28H49N3O14P2	-0.03	MG(0:0/16:1(9Z)/0:0) C19H36O4 + C9H13N3O10P2 -> C28H49N3O14P2
3636	312.155	13.24	4.66	Putative metabolite	C20H24O1S1	0.28	cis-Methylbixin C26H32O4 + O3S1 -> C26H32O7S1 - C6H8O6 -> C20H24O1S1
3646	196.01	5.3	4.57	Putative metabolite	C11H4N2S1	0.1	Cyclobrassinone C11H8N2O2S1 - H2O1 -> C11H6N2O1S1 - H2O1 -> C11H4N2S1
3657	345.19	11.3	4.58	Putative metabolite	C15H27N3O6	0.25	Ophthalmic acid C11H19N3O6 + C2H4 -> C13H23N3O6 + C2H4 -> C15H27N3O6
3664	502.166	11.2	4.46	Putative metabolite	C18H26N6O11	-0.29	6-Carboxy-5,6,7,8-tetrahydropterin C7H9N5O3 + C11H17N1O8 -> C18H26N6O11
3666	271.054	8.56	4.53	Putative metabolite	C7H13N1O10	0.17	Lactosamine C12H23N1O10 - C5H8 -> C7H15N1O10 - H2 -> C7H13N1O10
3667	355.148	11.27	4.45	Putative metabolite	C13H25N1O10	-0.15	Lactosamine C12H23N1O10 + C1H2 -> C13H25N1O10
3692	371.082	16.94	4.22	Putative metabolite	C13H18N5O4P1S1	0.03	Thiamine monophosphate C12H17N4O4P1S1 + C1O1 -> C13H17N4O5P1S1 - H-1N-1O1 -> C13H18N5O4P1S1
3693	371.082	16.26	4.48	Putative metabolite	C13H18N5O4P1S1	0.03	Thiamine monophosphate C12H17N4O4P1S1 + C1O1 -> C13H17N4O5P1S1 - H-1N-1O1 -> C13H18N5O4P1S1
3712	230.138	12.64	4.56	Putative metabolite	C9H18N4O3	0.39	N-Acetyl-L-arginine C8H16N4O3 + C1H2 -> C9H18N4O3
3730	397.161	2.14	3.9	Putative metabolite	C18H25N2O8	0.23	Aminochrome o-semiquinone C8H8N1O2 - C1H2 -> C7H6N1O2 + H3N1 -> C7H9N2O2 + C6H8O6 -> C13H17N2O8 + C5H8 -> C18H25N2O8
3731	250.069	11.29	4.5	Putative metabolite	C9H14O8	0.27	pyruvate C3H4O3 + C6H10O5 -> C9H14O8
3740	246.04	13.92	4.41	Putative metabolite	C13F3H5N2	0.34	Niflumic Acid C13F3H9N2O2 - H2O1 -> C13F3H7N2O1 - H2O1 -> C13F3H5N2
3758	337.069	14.11	4.52	Putative metabolite	C9H15N5O7S1	-0.24	Tetrahydroneopterin C9H15N5O4 + O3S1 -> C9H15N5O7S1
3760	276.143	12.32	4.5	Putative metabolite	C10H20N4O5	-0.11	Norophthalmic acid C10H17N3O6 + H3N1O-1 -> C10H20N4O5
3776	161.014	7.66	4.85	Putative metabolite	C5H7N1O3S1	1.02	Pyroglutamic acid C5H7N1O3 + S1 -> C5H7N1O3S1
3782	316.056	7.06	4.36	Putative metabolite	C9H17O10P1	-0.21	1-(sn-Glycero-3-phospho)-1D-myo-inositol C9H19O11P1 - H2O1 -> C9H17O10P1
3791	430.132	11.96	4.49	Putative metabolite	C15H26O14	0.36	3-Deoxy-D-glycero-D-galacto-2-nonulosonic acid C9H16O9 + C6H10O5 -> C15H26O14
3802	333.288	4.54	4.46	Putative metabolite	C18H39N1O4	-0.27	MG(0:0/15:0/0:0) C18H36O4 + H3N1 -> C18H39N1O4
3803	219.074	13.24	4.47	Putative metabolite	C8H13N1O6	0.85	N-Carboxyethyl-g-aminobutyric acid C7H13N1O4 + C1O2 -> C8H13N1O6
3808	143.022	11.25	4.44	Putative metabolite	C5H5N1O4	0.4	2-Amino-3-carboxymuconic acid semialdehyde C7H7N1O5 - C2H2O1 -> C5H5N1O4
3809	372.101	6.55	4.1	Putative metabolite	C13H25O8P1S1	-0.34	Malaoxon C10H19O7P1S1 + C1H2O1 -> C11H21O8P1S1 + C2H4 -> C13H25O8P1S1
3810	311.067	11.36	4.5	Putative metabolite	C10H17N1O8S1	-0.04	Homocysteine C4H9N1O2S1 + C6H8O6 -> C10H17N1O8S1
3812	332.174	2.07	4.42	Putative metabolite	C18H24N2O4	0.02	Na-Hexanoyl-Nb-inosityltryptophan C23H32N2O8 - C6H10O5 -> C17H22N2O3 + C1H2O1 -> C18H24N2O4
3813	255.114	11.19	4.45	Putative metabolite	C9H21N1O5S1	0.95	2-Ethyl-1-hexanol sulfate C8H18O4S1 + C1H2O1 -> C9H20O5S1 + H1N1 -> C9H21N1O5S1
3818	259.054	14.41	4.41	Putative metabolite	C10Cl1H14N3O1S1	1.2	chondroitin sulfate E (GalNAc4,6diS-GlcA) proteoglycan C10Cl1H10N3 + H2O1 -> C10Cl1H12N3O1 + H2S1 -> C10Cl1H14N3O1S1
3825	223.067	14.17	4.66	Putative metabolite	C11H13N1O2S1	-0.45	tryptophan C11H12N2O2 + H2S1 -> C11H14N2O2S1 - H1N1 -> C11H13N1O2S1
3827	342.09	6.02	4.01	Putative metabolite	C12H23O7P1S1	0.32	Malaoxon C10H19O7P1S1 + C2H4 -> C12H23O7P1S1
3833	295.004	14.19	4.28	Putative metabolite	C6H9N5O5S2	0.37	Methazolamide C5H8N4O3S2 + H1N1 -> C5H9N5O3S2 + C1O2 -> C6H9N5O5S2
3834	183.056	7.58	4.53	Putative metabolite	C5H13N1O4S1	0.7	[2-(dimethylamino)ethoxy]sulfonic acid C4H11N1O4S1 + C1H2 -> C5H13N1O4S1
3838	214.009	14.39	4.47	Putative metabolite	C12H6O2S1	-0.23	6-Methoxy-3-(2-thiazolyl)-1H-indole C12H10N2O1S1 - H1N1 -> C12H9N1O1S1 - H3N1O-1 -> C12H6O2S1
3839	516.233	7.26	4.42	Putative metabolite	C24H32N6O7	0.09	Dihydrofolic acid C19H21N7O6 - H3N1 -> C19H18N6O6 + C1H2 -> C20H20N6O6 + H2O1 -> C20H22N6O7 + H2 -> C20H24N6O7 + C2H4 -> C22H28N6O7 + C2H4 -> C24H32N6O7
3843	269.129	9.87	4.06	Putative metabolite	C10H23N1O5S1	1.09	2-Methyl-1-propanethiol C4H10S1 + C6H10O5 -> C10H20O5S1 + H3N1 -> C10H23N1O5S1
3844	269.129	9.29	4.11	Putative metabolite	C10H23N1O5S1	1.09	2-Methyl-1-propanethiol C4H10S1 + C6H10O5 -> C10H20O5S1 + H3N1 -> C10H23N1O5S1
3851	245.037	7.04	4.5	Putative metabolite	C11Cl2H13N1O1	0.49	Chlorambucil C14Cl2H19N1O2 - C1H2O1 -> C13Cl2H17N1O1 - C2H4 -> C11Cl2H13N1O1
3856	460.173	2.87	4.49	Putative metabolite	C24H28O9	-0.15	Cubebinone C23H26O8 + C1H2O1 -> C24H28O9
3876	215.079	5.31	4.42	Putative metabolite	C9H13N1O5	-0.13	N-Acetyl-L-glutamate 5-semialdehyde C7H11N1O4 + C2H2O1 -> C9H13N1O5
3884	319.153	9.41	4.53	Putative metabolite	C16H21N3O4	0.33	Prolyl-Tryptophan C16H19N3O3 + H2O1 -> C16H21N3O4
3886	292.073	12.75	4.45	Putative metabolite	C10H16N2O6S1	0.02	glutathione C10H17N3O6S1 - H1N1 -> C10H16N2O6S1
3897	303.191	14.67	4.43	Putative metabolite	C12H25N5O4	-0.15	Arginyl-Threonine C10H21N5O4 + C2H4 -> C12H25N5O4
3900	349.05	12.24	4.39	Putative metabolite	C16F3H10N3O1S1	0.48	Celecoxib C17F3H14N3O2S1 - C1H2O1 -> C16F3H12N3O1S1 - H2 -> C16F3H10N3O1S1
3903	793.547	3.08	4.48	Putative metabolite	C41H80N1O11P1	0.38	PS(16:0/18:0) C40H78N1O10P1 + C1H2O1 -> C41H80N1O11P1
3914	729.159	11.31	4.46	Putative metabolite	C23H37N7O14P2S1	-0.08	acetyl-CoA C23H38N7O17P3S1 - H1O3P1 -> C23H37N7O14P2S1
3916	299.102	5.93	4.45	Putative metabolite	C14H13N5O3	0.13	7,8-Dihydropteroic acid C14H14N6O3 - H1N1 -> C14H13N5O3
3917	299.104	10.53	4.26	Putative metabolite	C10H21N1O7S1	0.91	Homocysteine C4H9N1O2S1 + C6H10O5 -> C10H19N1O7S1 + H2 -> C10H21N1O7S1
3922	232.048	5.97	4.3	Putative metabolite	C11H8N2O4	0.46	Nitroxoline C9H6N2O3 + C2H2O1 -> C11H8N2O4
3925	343.247	2.99	4.4	Putative metabolite	C17H33N3O4	-0.27	Val-Val-Val C15H29N3O4 + C2H4 -> C17H33N3O4
3930	303.031	12.25	4.47	Putative metabolite	C8Cl2H16N3O3P1	-0.22	Cyclophosphamide C7Cl2H15N2O2P1 - H-1N-1O1 -> C7Cl2H16N3O1P1 + C1O2 -> C8Cl2H16N3O3P1
3946	345.119	11.92	4.48	Putative metabolite	C11H24N1O9P1	-0.38	Phosphorylcholine C5H14N1O4P1 + C6H10O5 -> C11H24N1O9P1
3970	303.118	13.76	4.29	Putative metabolite	C10H17N5O6	-0.06	Vicine C10H16N4O7 - H-1N-1O1 -> C10H17N5O6
3977	341.231	7.11	4.38	Putative metabolite	C17H31N3O4	-0.13	Lysyl-Valine C11H23N3O3 + C1O1 -> C12H23N3O4 + C5H8 -> C17H31N3O4
3989	376.159	11.29	4.39	Putative metabolite	C14H24N4O8	0.3	N2-(2-Carboxymethyl-2-hydroxysuccinoyl)arginine C12H20N4O8 + C2H4 -> C14H24N4O8
3990	376.159	3.11	4.12	Putative metabolite	C14H24N4O8	0.57	N2-(2-Carboxymethyl-2-hydroxysuccinoyl)arginine C12H20N4O8 + C2H4 -> C14H24N4O8
3993	120.983	11.26	4.44	Putative metabolite	C2H3N1O3S1	1.35	N-Formyl-L-methionine C6H11N1O3S1 - C2H4 -> C4H7N1O3S1 - C2H4 -> C2H3N1O3S1
4001	217.095	8.96	4.18	Putative metabolite	C9H15N1O5	0.56	N-Carboxyethyl-g-aminobutyric acid C7H13N1O4 + C2H2O1 -> C9H15N1O5
4003	372.082	7.07	4.22	Putative metabolite	C12H21O11P1	-0.14	glucose-1-phosphate C6H13O9P1 + C5H8 -> C11H21O9P1 + C1O2 -> C12H21O11P1
4005	303.114	8.85	4.47	Putative metabolite	C16Cl1H18N3O1	0.13	Tetrazepam C16Cl1H17N2O1 + H1N1 -> C16Cl1H18N3O1
4007	223.023	11.12	4.32	Putative metabolite	C8H5N3O5	0.54	Furazolidone C8H7N3O5 - H2 -> C8H5N3O5
4010	222.056	2.99	4.38	Putative metabolite	C11Cl1H11N2O1	0.41	chondroitin sulfate E (GalNAc4,6diS-GlcA) proteoglycan C10Cl1H10N3 + C1H2O1 -> C11Cl1H12N3O1 - H1N1 -> C11Cl1H11N2O1
4011	323.092	13.67	4.41	Putative metabolite	C16Cl1H18N1O4	0.11	Fenoldopam C16Cl1H16N1O3 + H2O1 -> C16Cl1H18N1O4
4012	573.122	11.87	4.46	Putative metabolite	C19H24N7O12P1	-0.25	uridine C9H12N2O6 + C10H12N5O6P1 -> C19H24N7O12P1
4033	400.107	11.63	4.45	Putative metabolite	C13H25N2O8P1S1	0.06	Pantetheine C11H22N2O4S1 + C2H2O1 -> C13H24N2O5S1 + H1O3P1 -> C13H25N2O8P1S1
4041	290.99	7	4.27	Putative metabolite	C6H13N1O6S3	0.69	N-Formyl-L-methionine C6H11N1O3S1 + H2S1 -> C6H13N1O3S2 + O3S1 -> C6H13N1O6S3
4053	304.109	11.28	4.27	Putative metabolite	C12H20N2O5S1	-0.35	N-gamma-Glutamyl-S-allylcysteine C11H18N2O5S1 + C1H2 -> C12H20N2O5S1
4058	186.075	13.27	4.34	Putative metabolite	C6H10N4O3	0.48	Homoanserine C11H18N4O3 - C5H8 -> C6H10N4O3
4091	297.052	2.11	4.41	Putative metabolite	C9H15N1O8S1	-0.21	alanine C3H7N1O2 + C6H8O6 -> C9H15N1O8 + S1 -> C9H15N1O8S1
4092	287.185	7.98	3.88	Putative metabolite	C13H25N3O4	0.02	Lysyl-Valine C11H23N3O3 + C2H2O1 -> C13H25N3O4
4094	191.965	2.31	4.31	Putative metabolite	C6Cl1H5O3S1	-0.04	2-Chloro-5-methyl-cis-dienelactone C7Cl1H5O4 - C1H2O1 -> C6Cl1H3O3 + H2S1 -> C6Cl1H5O3S1
4095	454.071	13.04	4.26	Putative metabolite	C15H22N2O10S2	1.07	(2R)-2-Hydroxy-2-(4-hydroxyphenyl)ethyl glucosinolate C15H21N1O11S2 - H-1N-1O1 -> C15H22N2O10S2
4103	380.329	2.2	4.37	Putative metabolite	C24H44O3	-0.14	2-Octenoic acid C8H14O2 + C16H30O1 -> C24H44O3
4118	210.049	10.31	4.36	Putative metabolite	C5H10N2O7	0	L-alpha-glutamyl-L-hydroxyproline C10H16N2O6 - C5H8 -> C5H8N2O6 + H2O1 -> C5H10N2O7
4121	241.05	14.4	4.23	Putative metabolite	C11Cl1H12N1O3	0.71	m-Chlorohippuric acid C9Cl1H8N1O3 + C2H4 -> C11Cl1H12N1O3
4126	186.112	12.15	4.4	Putative metabolite	C7H14N4O2	0.94	N-Acetyl-L-arginine C8H16N4O3 - C1H2O1 -> C7H14N4O2
4139	362.045	11.29	4.28	Putative metabolite	C11H15N4O6P1S1	-0.02	5'-Methylthioadenosine C11H15N5O3S1 - H1N1 -> C11H14N4O3S1 + H1O3P1 -> C11H15N4O6P1S1
4142	314.102	4.22	5.44	Putative metabolite	C15H14N4O4	-0.62	Metabolite M6 C30H42N4O4 - C16H30O1 -> C14H12N4O3 + C1H2O1 -> C15H14N4O4
4144	235.048	3.43	4.4	Putative metabolite	C11H9N1O5	0.73	5-Hydroxyindoleacetic acid C10H9N1O3 + C1O2 -> C11H9N1O5
4156	411.12	11.31	3.91	Putative metabolite	C15H25N1O10S1	0.28	Ethyl 2-mercaptopropionate C5H10O2S1 + C11H17N1O8 -> C16H27N1O10S1 - C1H2 -> C15H25N1O10S1
4163	273.158	8.8	4.38	Putative metabolite	C13H23N1O5	0.08	2-Methylbutyroylcarnitine C12H23N1O4 + C1O1 -> C13H23N1O5
4164	273.158	2.3	4.04	Putative metabolite	C13H23N1O5	-0.28	2-Methylbutyroylcarnitine C12H23N1O4 + C1O1 -> C13H23N1O5
4168	362.125	13.02	4.19	Putative metabolite	C12H26O10S1	-0.37	Hexaethylene glycol C12H26O7 + O3S1 -> C12H26O10S1
4174	433.071	3.11	4.36	Putative metabolite	C13H23N1O11S2	0.81	cystathionine C7H14N2O4S1 + H-1N-1O1 -> C7H13N1O5S1 + H2S1 -> C7H15N1O5S2 + C6H8O6 -> C13H23N1O11S2
4175	175.023	5.32	4.33	Putative metabolite	C4H5N3O5	1.26	Cytidine C9H13N3O5 - C5H8 -> C4H5N3O5
4178	847.594	4.37	4.34	Putative metabolite	C45H86N1O11P1	0.06	PS(14:0/24:1(15Z)) C44H84N1O10P1 + C1H2O1 -> C45H86N1O11P1
4181	308.147	16.24	3.84	Putative metabolite	C13H24O8	-0.59	3-Hydroxyisoheptanoic acid C7H14O3 + C6H10O5 -> C13H24O8
4183	348.095	13.99	4.23	Putative metabolite	C19Cl1H21O2S1	0.51	Fenofibrate C20Cl1H21O4 - C1O2 -> C19Cl1H21O2 + S1 -> C19Cl1H21O2S1
4187	213.075	13.04	4.32	Putative metabolite	C8H11N3O4	0.26	Cytidine C9H13N3O5 - C1H2O1 -> C8H11N3O4
4191	440.146	3.08	4.34	Putative metabolite	C16H28N2O10S1	0.38	methionine C5H11N1O2S1 + C11H17N1O8 -> C16H28N2O10S1
4193	440.146	8.76	3.7	Putative metabolite	C16H28N2O10S1	0.6	methionine C5H11N1O2S1 + C11H17N1O8 -> C16H28N2O10S1
4195	316.098	7.02	4	Putative metabolite	C14H20O6S1	-0.13	{[1-(4-methoxyphenyl)-4-methyl-3-oxopentyl]oxy}sulfonic acid C13H18O6S1 + C1H2 -> C14H20O6S1
4198	455.193	13.01	4.33	Putative metabolite	C17H33N3O9S1	0.77	Pantetheine C11H22N2O4S1 + H1N1 -> C11H23N3O4S1 + C6H10O5 -> C17H33N3O9S1
4220	198.01	3.24	4.34	Putative metabolite	C7H6N2O3S1	0.57	2-S-cysteinyl-DOPA C12H16N2O6S1 + C1O2 -> C13H16N2O8S1 - C6H10O5 -> C7H6N2O3S1
4226	532.252	2.07	4.31	Putative metabolite	C28H41N2O4P1S1	0.5	1-Methyl-3-(2-thiazolyl)-1H-indole C12H10N2S1 + H1O3P1 -> C12H11N2O3P1S1 + C16H30O1 -> C28H41N2O4P1S1
4234	382.254	2.04	4.33	Putative metabolite	C22H38O3S1	0.17	3,4-Dimethyl-5-pentyl-2-furanundecanoic acid C22H38O3 + S1 -> C22H38O3S1
4241	589.305	7.12	4.21	Putative metabolite	C25H52N1O10P1S1	0.09	1-Stearoylglycerophosphoserine C24H48N1O9P1 + C1H2O1 -> C25H50N1O10P1 + H2S1 -> C25H52N1O10P1S1
4242	440.202	11.29	4.28	Putative metabolite	C26H32O4S1	0.3	cis-Methylbixin C26H32O4 + S1 -> C26H32O4S1
4246	454.235	13.04	4.2	Putative metabolite	C21H35N4O5P1	-0.43	guanine C5H5N5O1 + H1O3P1 -> C5H6N5O4P1 + C16H30O1 -> C21H36N5O5P1 - H1N1 -> C21H35N4O5P1
4250	190.041	9.25	4.05	Putative metabolite	C6H10N2O3S1	0.59	1-(Hydroxymethyl)-5,5-dimethyl-2,4-imidazolidinedione C6H10N2O3 + S1 -> C6H10N2O3S1
4263	172.035	8.95	4	Putative metabolite	C11H8S1	-0.17	{2-hydroxy-5-[(2E)-3-phenylprop-2-enoyl]phenyl}oxidanesulfonic acid C15H12O6S1 + C2H4 -> C17H16O6S1 - C6H8O6 -> C11H8S1
4277	273.053	11.97	4.31	Putative metabolite	C8H19N1O3S3	0.75	3-[(2-Mercapto-1-methylpropyl)thio]-2-butanol C8H18O1S2 - H-1N-1O1 -> C8H19N1S2 + O3S1 -> C8H19N1O3S3
4285	272.185	9.06	4.32	Putative metabolite	C12H24N4O3	0.15	Arginyl-Isoleucine C12H25N5O3 - H1N1 -> C12H24N4O3
4288	324.08	7.07	4.04	Putative metabolite	C12H21O6P1S1	-0.17	{[1-(4-methoxyphenyl)-4-methylpentan-3-yl]oxy}sulfonic acid C13H20O5S1 + H1O3P1 -> C13H21O8P1S1 - C1O2 -> C12H21O6P1S1
4290	359.206	11.3	4.35	Putative metabolite	C16H29N3O6	-0.18	Val-Val-Val C15H29N3O4 + C1O2 -> C16H29N3O6
4299	329.181	16.79	4.2	Putative metabolite	C12H23N7O4	0.16	Arginyl-Histidine C12H21N7O3 + H2O1 -> C12H23N7O4
4303	297.063	13.66	4.17	Putative metabolite	C8H15N3O7S1	0.24	N-a-Acetylcitrulline C8H15N3O4 + O3S1 -> C8H15N3O7S1
4307	181.024	7.99	4.27	Putative metabolite	C5H3N5O3	0.49	6-Succinoaminopurine C9H9N5O3 + C1H2 -> C10H11N5O3 - C5H8 -> C5H3N5O3
4312	228.055	2.08	4.25	Putative metabolite	C11Cl1H13O3	0.1	Clofibrate C12Cl1H15O3 - C1H2 -> C11Cl1H13O3
4316	138.053	7.17	5.39	Putative metabolite	C4H10O5	0.17	Ribitol C5H12O5 - C1H2 -> C4H10O5
4321	303.008	11.17	4.33	Putative metabolite	C9H10N3O5P1S1	0.26	Sulfamethoxazole C10H11N3O3S1 + H1O3P1 -> C10H12N3O6P1S1 - C1H2O1 -> C9H10N3O5P1S1
4322	303.008	10.83	4.33	Putative metabolite	C10Cl1H10N3O4S1	0.51	chondroitin sulfate E (GalNAc4,6diS-GlcA) proteoglycan C10Cl1H10N3 + O1 -> C10Cl1H10N3O1 + O3S1 -> C10Cl1H10N3O4S1
4333	545.32	16.83	4.06	Putative metabolite	C27H47N1O10	-0.19	Hypogeic acid C16H30O2 + C11H17N1O8 -> C27H47N1O10
4338	342.189	4.72	4.26	Putative metabolite	C14H30O9	0.24	Heptaethylene glycol C14H30O8 + O1 -> C14H30O9
4354	210.056	11.28	4.3	Putative metabolite	C7H14O5S1	0.92	2-Isopropylmalic acid C7H12O5 + H2S1 -> C7H14O5S1
4356	426.111	7.04	4.12	Putative metabolite	C16H27O9P1S1	-0.38	Malaoxon C10H19O7P1S1 + C1O2 -> C11H19O9P1S1 + C5H8 -> C16H27O9P1S1
4366	320.217	16.91	4.22	Putative metabolite	C12H28N6O4	-0.3	Arginyl-Lysine C12H26N6O3 + H2O1 -> C12H28N6O4
4372	321.124	1.28	4.12	Putative metabolite	C13H23N1O6S1	0.65	Dioscoretine C13H23N1O3 + O3S1 -> C13H23N1O6S1
4386	216.024	9.31	4.5	Putative metabolite	C12H8O2S1	0.93	6-Methoxy-3-(2-thiazolyl)-1H-indole C12H10N2O1S1 - H1N1 -> C12H9N1O1S1 + H-1N-1O1 -> C12H8O2S1
4388	386.222	2.29	4.21	Putative metabolite	C20H35O5P1	-0.49	8,11,14-Eicosatrienoic acid C20H34O2 + H1O3P1 -> C20H35O5P1
4390	339.977	13.81	4.22	Putative metabolite	C6H12O12S2	0.64	{[2,3,4-trihydroxy-5-(hydroxymethyl)oxolan-2-yl]methoxy}sulfonic acid C6H12O9S1 + O3S1 -> C6H12O12S2
4395	299.122	13.02	4.24	Putative metabolite	C10H21N1O9	-0.23	Arabinopyranobiose C10H18O9 + H3N1 -> C10H21N1O9
4397	284.042	14.44	4.29	Putative metabolite	C8H17N2O3P1S2	0.07	1-Isothiocyanato-6-(methylthio)hexane C8H15N1S2 + H1N1 -> C8H16N2S2 + H1O3P1 -> C8H17N2O3P1S2
4409	318.099	12.21	4.23	Putative metabolite	C14Cl1H15N6O1	1.22	Eszopiclone C17Cl1H17N6O3 - C2H2O1 -> C15Cl1H15N6O2 - C1O1 -> C14Cl1H15N6O1
4410	318.099	11.55	3.99	Putative metabolite	C14Cl1H15N6O1	1.22	Eszopiclone C17Cl1H17N6O3 - C2H2O1 -> C15Cl1H15N6O2 - C1O1 -> C14Cl1H15N6O1
4425	362.221	4.07	4.01	Putative metabolite	C20H30N2O4	-0.12	Isoleucyl-Tyrosine C15H22N2O4 + C5H8 -> C20H30N2O4
4431	248.089	11.57	4.1	Putative metabolite	C10H16O7	0.41	Diethyl tartrate C8H14O6 + C2H2O1 -> C10H16O7
4432	248.089	11.3	4.1	Putative metabolite	C10H16O7	0.41	Diethyl tartrate C8H14O6 + C2H2O1 -> C10H16O7
4437	353.078	10.55	3.93	Putative metabolite	C12H19N1O9S1	0.15	N-Formyl-L-methionine C6H11N1O3S1 + C6H8O6 -> C12H19N1O9S1
4449	465.105	14.01	4.26	Putative metabolite	C18H20N5O8P1	-0.11	Phenylacetic acid C8H8O2 + C10H12N5O6P1 -> C18H20N5O8P1
4451	543.077	13.19	4.23	Putative metabolite	C15H23N5O13P2	0.29	1-(Hydroxymethyl)-5,5-dimethyl-2,4-imidazolidinedione C6H10N2O3 + C9H13N3O10P2 -> C15H23N5O13P2
4458	338.075	16.8	4.08	Putative metabolite	C14H14N2O8	-0.55	3,4-dihydroxy-5-(3,4,5-trihydroxybenzoyloxy)benzoic acid C14H10O9 + H3N1O-1 -> C14H13N1O8 + H1N1 -> C14H14N2O8
4459	306.179	5.28	3.91	Putative metabolite	C13H26N2O6	-0.04	N(1)-isopropyl-2-methylpropan-1,2-diamine C7H18N2 + C6H8O6 -> C13H26N2O6
4464	321.098	7.08	4.01	Putative metabolite	C9H17N6O5S1	0.35	7-methylguanosine C11H16N5O5 + H2S1 -> C11H18N5O5S1 - C2H4 -> C9H14N5O5S1 + H3N1 -> C9H17N6O5S1
4467	172.988	2.21	4.23	Putative metabolite	C6Cl1H4N1O3	-0.17	m-Chlorohippuric acid C9Cl1H8N1O3 + C2H4 -> C11Cl1H12N1O3 - C5H8 -> C6Cl1H4N1O3
4468	354.164	11.93	4.19	Putative metabolite	C13H26N2O9	-0.2	N-Carboxyethyl-g-aminobutyric acid C7H13N1O4 + H3N1 -> C7H16N2O4 + C6H10O5 -> C13H26N2O9
4474	276.176	2.16	4.22	Putative metabolite	C14H28O3S1	-0.31	2-Hydroxymyristic acid C14H28O3 + S1 -> C14H28O3S1
4483	313.98	2.04	4.17	Putative metabolite	C4H12O12P2	0	6-Phosphogluconic acid C6H13O10P1 - C2H2O1 -> C4H11O9P1 + H1O3P1 -> C4H12O12P2
4493	554.213	2.1	4.2	Putative metabolite	C24H35N4O9P1	1.2	3-Oxotetradecanoic acid C14H26O3 + C10H12N5O6P1 -> C24H38N5O9P1 - H3N1 -> C24H35N4O9P1
4494	495.135	14.57	4.25	Putative metabolite	C15H30N1O15P1	0.01	Glycerophosphocholine C8H20N1O6P1 + C1O2 -> C9H20N1O8P1 + H2O1 -> C9H22N1O9P1 + C6H8O6 -> C15H30N1O15P1
4495	286.064	7.07	4.22	Putative metabolite	C16F1H11O4	0.48	Flurbiprofen C15F1H13O2 + C1O2 -> C16F1H13O4 - H2 -> C16F1H11O4
4496	309.02	10.78	4.21	Putative metabolite	C14Cl1F1H9N1O4	0.69	5-Carboxy-lumiracoxib C16Cl1F1H13N1O4 - C2H4 -> C14Cl1F1H9N1O4
4509	273.169	7.49	4.19	Putative metabolite	C12H23N3O4	0.21	Lysyl-Valine C11H23N3O3 + C1O1 -> C12H23N3O4
4532	366.164	12.85	4.27	Putative metabolite	C14H26N2O9	0.08	Serylvaline C8H16N2O4 + C6H10O5 -> C14H26N2O9
4539	191.025	16.19	3.8	Putative metabolite	C6H9N1O4S1	0.15	L-2-Amino-4-methylenepentanedioic acid C6H9N1O4 + S1 -> C6H9N1O4S1
4549	304.128	12.29	4.29	Putative metabolite	C21H20S1	0.56	Pimethixene C19H19N1S1 - H3N1 -> C19H16S1 + C2H4 -> C21H20S1
4554	270.077	11.94	4.24	Putative metabolite	C9H18O7S1	0.09	(x)-1,2-Propanediol 1-O-b-D-glucopyranoside C9H18O7 + S1 -> C9H18O7S1
4584	322.062	14.13	4.13	Putative metabolite	C17Cl1H11N4O1	0.12	desmethyladinazolam C17Cl1H14N5 - H3N1O-1 -> C17Cl1H11N4O1
4587	268.103	11.16	4.06	Putative metabolite	C16H16N2S1	0.82	N-Desmethylpromazine C16H18N2S1 - H2 -> C16H16N2S1
4589	225.021	7.75	3.98	Putative metabolite	C8H7N3O3S1	0.05	Sulfamethoxazole C10H11N3O3S1 - C2H4 -> C8H7N3O3S1
4590	294.114	7.08	4	Putative metabolite	C12H22O6S1	0.03	Diisopropyl sulfide C6H14S1 + C6H8O6 -> C12H22O6S1
4593	348.153	7.77	4.2	Putative metabolite	C14H24N2O8	0.19	Alanyl-Proline C8H14N2O3 + C6H10O5 -> C14H24N2O8
4601	436.159	7.95	4.26	Putative metabolite	C19H24N4O8	0.26	4-Acetylimidazo[4,5-c]pyridine C8H7N3O1 - O1 -> C8H7N3 + C11H17N1O8 -> C19H24N4O8
4602	258.194	8.12	4.24	Putative metabolite	C13H26N2O3	0.17	Isoleucyl-Valine C11H22N2O3 + C2H4 -> C13H26N2O3
4603	278.047	16.23	4.18	Putative metabolite	C11H18O2S3	1.05	Isoprothiolane C12H18O4S2 + S1 -> C12H18O4S3 - C1O2 -> C11H18O2S3
4610	570.209	2.09	4.03	Putative metabolite	C24H35N4O10P1	0.49	3-Oxotetradecanoic acid C14H26O3 + C10H12N5O6P1 -> C24H38N5O9P1 - H3N1O-1 -> C24H35N4O10P1
4612	209.036	9.27	4.2	Putative metabolite	C6H11N1O5S1	0.45	N-Acetyl-L-aspartic acid C6H9N1O5 + H2S1 -> C6H11N1O5S1
4632	353.132	11.25	4.04	Putative metabolite	C13H23N1O10	-0.01	N-Methyl-1-deoxynojirimycin C7H15N1O4 + C6H8O6 -> C13H23N1O10
4635	171.03	14.17	4.1	Putative metabolite	C3H10N1O5P1	0.34	sn-glycerol-3-phosphate C3H9O6P1 - H-1N-1O1 -> C3H10N1O5P1
4640	257.075	11.97	4.23	Putative metabolite	C7H15N1O9	-0.85	2,3,4,5,6,7-Hexahydroxyheptanoic acid C7H14O8 + O1 -> C7H14O9 + H1N1 -> C7H15N1O9
4653	375.175	14.21	4.18	Putative metabolite	C14H25N5O7	0	Glycyl-Histidine C8H12N4O3 + H3N1O-1 -> C8H15N5O2 + C6H10O5 -> C14H25N5O7
4657	394.078	14.25	4.15	Putative metabolite	C11H22O13S1	0.79	Ribitol C5H12O5 + C6H10O5 -> C11H22O10 + O3S1 -> C11H22O13S1
4666	151.019	2.65	5.35	Putative metabolite	C8Cl1H6N1	1.17	4-Chloro-1H-indole-3-acetic acid C10Cl1H8N1O2 - C1H2O1 -> C9Cl1H6N1O1 - C1O1 -> C8Cl1H6N1
4671	307.048	11.5	4.1	Putative metabolite	C9H13N3O7S1	-0.26	S-Formylglutathione C11H17N3O7S1 - C2H4 -> C9H13N3O7S1
4682	269.075	2.09	3.93	Putative metabolite	C9H19N1O4S2	0.18	Dihydrolipoate C8H16O2S2 + C1O2 -> C9H16O4S2 + H3N1 -> C9H19N1O4S2
4685	384.212	14.79	4.23	Putative metabolite	C16H28N6O5	-0.47	Valganciclovir C14H22N6O5 + C2H4 -> C16H26N6O5 + H2 -> C16H28N6O5
4686	541.205	16.93	4.05	Putative metabolite	C19H35N5O11S1	0.88	N-Acetyl-L-arginine C8H16N4O3 + C11H17N1O8 -> C19H33N5O11 + H2S1 -> C19H35N5O11S1
4687	541.205	16.27	3.99	Putative metabolite	C19H35N5O11S1	0.88	N-Acetyl-L-arginine C8H16N4O3 + C11H17N1O8 -> C19H33N5O11 + H2S1 -> C19H35N5O11S1
4689	239.052	14.45	4.18	Putative metabolite	C13H9N3S1	0.08	Oxacillin C19H19N3O5S1 - C6H10O5 -> C13H9N3S1
4702	325.165	2.09	4.08	Putative metabolite	C13H28N1O6P1	0.38	Glycerophosphocholine C8H20N1O6P1 + C5H8 -> C13H28N1O6P1
4706	318.116	11.4	4.29	Putative metabolite	C10H22O11	0.04	Melibiose C12H22O11 - C2H2O1 -> C10H20O10 + H2O1 -> C10H22O11
4709	148.023	8.02	3.87	Putative metabolite	C2H4N4O4	-0.31	Allantoic acid C4H8N4O4 - C2H4 -> C2H4N4O4
4711	138.09	6.97	3.94	Putative metabolite	C6H10N4	0.34	Tetrahydropteridine C6H8N4 + H2 -> C6H10N4
4719	361.319	4.41	3.92	Putative metabolite	C20H43N1O4	-0.53	10,20-Dihydroxyeicosanoic acid C20H40O4 + H3N1 -> C20H43N1O4
4722	285.052	7.72	3.86	Putative metabolite	C8H15N1O8S1	0.83	glycine C2H5N1O2 + C6H8O6 -> C8H13N1O8 + H2S1 -> C8H15N1O8S1
4724	507.217	12.42	4.11	Putative metabolite	C19H33N5O11	0.51	N-Acetyl-L-arginine C8H16N4O3 + C11H17N1O8 -> C19H33N5O11
4725	372.127	12.05	4.07	Putative metabolite	C13H24O12	0.2	Melibiose C12H22O11 + C1H2O1 -> C13H24O12
4729	296.147	8.92	4.15	Putative metabolite	C12H24O8	0.06	Polypropylene glycol (m w 1,200-3,000) C6H14O3 + C6H10O5 -> C12H24O8
4739	252.103	2.2	4.2	Putative metabolite	C10H20O5S1	0.18	2-Methyl-1-propanethiol C4H10S1 + C6H10O5 -> C10H20O5S1
4741	332.098	10.81	3.86	Putative metabolite	C14F3H15N2O4	0.28	Nitisinone C14F3H10N1O5 + H3N1O-1 -> C14F3H13N2O4 + H2 -> C14F3H15N2O4
4752	386.215	4.82	4.03	Putative metabolite	C16H34O10	-0.27	Octaethylene glycol C16H34O9 + O1 -> C16H34O10
4770	339.031	8.83	4.15	Putative metabolite	C15Cl1F1H11N1O5	0.23	4'-Hydroxy-5-carboxy-lumiracoxib C16Cl1F1H13N1O5 - C1H2 -> C15Cl1F1H11N1O5
4790	145.02	7.76	4	Putative metabolite	C5H7N1O2S1	1.03	Thiomorpholine 3-carboxylate C5H9N1O2S1 - H2 -> C5H7N1O2S1
4791	306.131	11.28	3.9	Putative metabolite	C13H22O8	0.22	3,4,5-trihydroxy-6-(2-hydroxyethoxy)oxane-2-carboxylic acid C8H14O8 + C5H8 -> C13H22O8
4796	319.987	2.02	4.02	Putative metabolite	C7H12O10S2	-0.04	2-Methylcitric acid C7H10O7 + H2S1 -> C7H12O7S1 + O3S1 -> C7H12O10S2
4798	359.135	11.53	4.11	Putative metabolite	C12H26N1O9P1	0.05	Phosphodimethylethanolamine C4H12N1O4P1 + C2H4 -> C6H16N1O4P1 + C6H10O5 -> C12H26N1O9P1
4800	322.054	7.74	3.85	Putative metabolite	C15Cl1H15N2O2S1	0.24	Glucose isomerase from streptomyces rubiginosus C17Cl1H17N2O3S1 - C2H2O1 -> C15Cl1H15N2O2S1
4801	186.02	13.03	4.04	Putative metabolite	C4H10O6S1	1.12	2-methyl-3-(sulfooxy)propanoic acid C4H8O6S1 + H2 -> C4H10O6S1
4804	233.043	8.9	4.04	Putative metabolite	C10H7N3O4	0.67	inosine C10H12N4O5 - H2O1 -> C10H10N4O4 - H3N1 -> C10H7N3O4
4810	317.195	7.63	4.14	Putative metabolite	C14H27N3O5	0.22	Marimastat C15H29N3O5 - C1H2 -> C14H27N3O5
4813	352.298	2.21	4.06	Putative metabolite	C22H40O3	-0.16	11Z-Eicosenoic acid C20H38O2 + C2H2O1 -> C22H40O3
4815	358.032	7.6	3.96	Putative metabolite	C9H14N2O11S1	-0.2	gamma-Glutamylcysteine C8H14N2O5S1 - C5H8 -> C3H6N2O5S1 + C6H8O6 -> C9H14N2O11S1
4816	283.069	9.57	4.03	Putative metabolite	C12H13N1O7	0.36	Nicotinic acid C6H5N1O2 + C6H10O5 -> C12H15N1O7 - H2 -> C12H13N1O7
4817	283.069	8.88	3.92	Putative metabolite	C12H13N1O7	0.36	Nicotinic acid C6H5N1O2 + C6H10O5 -> C12H15N1O7 - H2 -> C12H13N1O7
4820	174.01	13.02	4.93	Putative metabolite	C5H6N2O3S1	1.22	2-hydroxypyridine C5H5N1O1 + O3S1 -> C5H5N1O4S1 - H-1N-1O1 -> C5H6N2O3S1
4831	394.195	11.47	3.93	Putative metabolite	C16H30N2O9	-0.43	Spermic acid 2 C10H20N2O4 + C6H10O5 -> C16H30N2O9
4832	311.097	9.15	4.07	Putative metabolite	C9H17N3O9	-0.39	2-(Arabinosylamino)-3-(glucosylamino)propanenitrile C14H25N3O9 - C5H8 -> C9H17N3O9
4833	376.159	7.63	3.8	Putative metabolite	C14H24N4O8	0.04	N2-(2-Carboxymethyl-2-hydroxysuccinoyl)arginine C12H20N4O8 + C2H4 -> C14H24N4O8
4840	347.169	12.47	4.19	Putative metabolite	C14H25N3O7	-0.14	N-(1-Deoxy-1-fructosyl)histidine C12H19N3O7 + H2 -> C12H21N3O7 + C2H4 -> C14H25N3O7
4842	269.126	1.57	3.71	Putative metabolite	C13H19N1O5	0.46	L-2-Amino-4-methylenepentanedioic acid C6H9N1O4 + C2H2O1 -> C8H11N1O5 + C5H8 -> C13H19N1O5
4843	285.085	9.59	4.12	Putative metabolite	C12H15N1O7	0.18	Nicotinic acid C6H5N1O2 + C6H10O5 -> C12H15N1O7
4864	232.07	17.17	4.05	Putative metabolite	C9H16N2O1S2	0.88	1-Isothiocyanato-6-(methylthio)hexane C8H15N1S2 + H1N1 -> C8H16N2S2 + C1O1 -> C9H16N2O1S2
4873	238.142	4.62	4.1	Putative metabolite	C10H22O6	0.16	D-Glycero-D-galacto-heptitol C7H16O7 + C5H8 -> C12H24O7 - C2H2O1 -> C10H22O6
4879	342.19	10.43	3.62	Putative metabolite	C15H26N4O5	0.06	Glutaminylglutamine C10H18N4O5 + C5H8 -> C15H26N4O5
4880	488.202	7.6	3.84	Putative metabolite	C19H37O12P1	0.54	1-dodecanoyl-glycero-3-phosphate C15H31O7P1 + C6H10O5 -> C21H41O12P1 - C2H4 -> C19H37O12P1
4882	391.097	12.23	4.03	Putative metabolite	C12H25N1O9S2	0.7	N-Formyl-L-methionine C6H11N1O3S1 + H2S1 -> C6H13N1O3S2 + H2O1 -> C6H15N1O4S2 + C6H10O5 -> C12H25N1O9S2
4885	219.068	14.34	4.08	Putative metabolite	C15H9N1O1	0.52	Flavone C15H10O2 - H2 -> C15H8O2 - H-1N-1O1 -> C15H9N1O1
4886	219.068	14.74	4.03	Putative metabolite	C15H9N1O1	0.52	Flavone C15H10O2 - H2 -> C15H8O2 - H-1N-1O1 -> C15H9N1O1
4890	357.081	9.02	4.1	Putative metabolite	C13H15N3O9	-0.48	5-Acetylamino-6-amino-3-methyluracil C7H10N4O3 + C6H8O6 -> C13H18N4O9 - H3N1 -> C13H15N3O9
4896	300.143	12.54	3.98	Putative metabolite	C12H20N4O5	0.23	Glycylprolylhydroxyproline C12H19N3O5 + H1N1 -> C12H20N4O5
4906	318.132	11.27	3.97	Putative metabolite	C14H22O8	-0.42	2-Octenoic acid C8H14O2 + C6H8O6 -> C14H22O8
4920	304.116	11.29	3.92	Putative metabolite	C13H20O8	0.06	Osmundalin C12H18O8 + C1H2 -> C13H20O8
4921	253.143	7.35	4.08	Putative metabolite	C12H19N3O3	0.16	Histidinyl-Isoleucine C12H20N4O3 - H1N1 -> C12H19N3O3
4934	358.111	4.98	5.05	Putative metabolite	C12H22O12	0.63	Galactitol C6H14O6 + C6H8O6 -> C12H22O12
4940	266.138	9	4.1	Putative metabolite	C12H18N4O3	0.34	Histidinyl-Lysine C12H21N5O3 - H3N1 -> C12H18N4O3
4941	351.128	7.77	4.06	Putative metabolite	C12H21N3O9	-0.06	citrulline C6H13N3O3 + C6H8O6 -> C12H21N3O9
4949	294.084	3.91	3.74	Putative metabolite	C11H22N2O2Se1	0.51	Selenocystathionine C7H14N2O4Se1 + C5H8 -> C12H22N2O4Se1 - C1O2 -> C11H22N2O2Se1
4953	213.025	6.02	4.13	Putative metabolite	C12H7N1O1S1	1.1	6-Methoxy-3-(2-thiazolyl)-1H-indole C12H10N2O1S1 - H3N1 -> C12H7N1O1S1
4956	298.163	4.62	4.59	Putative metabolite	C12H26O8	0.23	Heptaethylene glycol C14H30O8 - C2H4 -> C12H26O8
4964	306.052	13.52	4.8	Putative metabolite	C10H14N2O7S1	-0.09	glutathione C10H17N3O6S1 - H3N1O-1 -> C10H14N2O7S1
4976	233.995	6.94	3.92	Putative metabolite	C6H6N2O6S1	-0.18	4-Nitrophenyl sulfate C6H5N1O6S1 + H1N1 -> C6H6N2O6S1
4978	328.148	11.77	4.04	Putative metabolite	C11H24N2O9	-0.06	Galactose-beta-1,4-xylose C11H20O10 + H1N1 -> C11H21N1O10 + H3N1O-1 -> C11H24N2O9
4981	287.032	10.84	4.11	Putative metabolite	C8H17N1O4S3	0.59	Dihydrolipoamide C8H17N1O1S2 + O3S1 -> C8H17N1O4S3
4997	257.075	9.36	3.94	Putative metabolite	C7H15N1O9	0.32	2,3,4,5,6,7-Hexahydroxyheptanoic acid C7H14O8 + O1 -> C7H14O9 + H1N1 -> C7H15N1O9
5014	256.113	2.19	5.91	Putative metabolite	C13H20O3S1	-0.33	Epoxyeremopetasinorol C13H20O3 + S1 -> C13H20O3S1
5016	308.145	2.15	4.08	Putative metabolite	C17H24O3S1	0.05	N-Undecylbenzenesulfonic acid C17H28O3S1 - H2 -> C17H26O3S1 - H2 -> C17H24O3S1
5023	240.059	7.76	3.95	Putative metabolite	C6H12N2O8	-0.14	Cycasin C8H16N2O7 - C2H4 -> C6H12N2O7 + O1 -> C6H12N2O8
5042	288.091	6.11	3.91	Putative metabolite	C8H21N2O5P1S1	-0.07	Glycerophosphocholine C8H20N1O6P1 - H-1N-1O1 -> C8H21N2O5P1 + S1 -> C8H21N2O5P1S1
5047	323.086	10.81	4.05	Putative metabolite	C15Cl1H18N3O1S1	0.96	Glucose isomerase from streptomyces rubiginosus C17Cl1H17N2O3S1 + H3N1O-1 -> C17Cl1H20N3O2S1 - C2H2O1 -> C15Cl1H18N3O1S1
5055	297.171	9.67	3.95	Putative metabolite	C12H28N1O5P1	0.03	Glycerophosphocholine C8H20N1O6P1 + C5H8 -> C13H28N1O6P1 - C1O1 -> C12H28N1O5P1
5061	343.174	12.82	4.13	Putative metabolite	C15H25N3O6	-0.19	Norophthalmic acid C10H17N3O6 + C5H8 -> C15H25N3O6
5068	299.185	8.87	3.89	Putative metabolite	C14H25N3O4	0.02	Asparaginyl-Valine C9H17N3O4 + C5H8 -> C14H25N3O4
5079	392.126	16.23	3.87	Putative metabolite	C23H20O6	-0.03	xi-8-Acetonyldihydrosanguinarine C23H19N1O5 + H2 -> C23H21N1O5 + H-1N-1O1 -> C23H20O6
5086	320.141	8.42	4.03	Putative metabolite	C13H24N2O5S1	-0.02	Pantetheine C11H22N2O4S1 + C2H2O1 -> C13H24N2O5S1
5088	274.105	13.02	4.13	Putative metabolite	C12H18O7	0.19	2-Methylcitric acid C7H10O7 + C5H8 -> C12H18O7
5097	383.011	12.23	3.9	Putative metabolite	C8H18N1O10P1S2	-0.59	(?-Methamidophos C2H8N1O2P1S1 + C6H10O5 -> C8H18N1O7P1S1 + O3S1 -> C8H18N1O10P1S2
5107	346.185	9.88	3.72	Putative metabolite	C14H26N4O6	-0.19	Asparaginyl-Glutamic acid C9H15N3O6 + H3N1 -> C9H18N4O6 + C5H8 -> C14H26N4O6
5108	417.15	12.58	3.89	Putative metabolite	C21F2H21N3O4	0.75	Sarafloxacin C20F2H17N3O3 + H2O1 -> C20F2H19N3O4 + C1H2 -> C21F2H21N3O4
5112	305.084	12.82	3.77	Putative metabolite	C14Cl1F1H13N5	-0.16	Cloransulam-methyl C15Cl1F1H13N5O5S1 - C1O2 -> C14Cl1F1H13N5O3S1 - O3S1 -> C14Cl1F1H13N5
5114	310.139	14.07	4.73	Putative metabolite	C20H22O1S1	0.44	Cyclobenzaprine C20H21N1 + H-1N-1O1 -> C20H20O1 + H2S1 -> C20H22O1S1
5115	310.139	13.74	4.73	Putative metabolite	C20H22O1S1	0.44	Cyclobenzaprine C20H21N1 + H-1N-1O1 -> C20H20O1 + H2S1 -> C20H22O1S1
5116	310.139	14.34	4.73	Putative metabolite	C12H18N6O4	0.17	Arginyl-Histidine C12H21N7O3 - H3N1O-1 -> C12H18N6O4
5119	253.098	11.97	3.96	Putative metabolite	C12Cl1H16N3O1	0.36	chondroitin sulfate E (GalNAc4,6diS-GlcA) proteoglycan C10Cl1H10N3 + H2O1 -> C10Cl1H12N3O1 + C2H4 -> C12Cl1H16N3O1
5122	314.111	14.71	4.01	Putative metabolite	C13H18N2O7	-0.32	Hypoglycin B C12H18N2O5 + C1O2 -> C13H18N2O7
5133	323.14	11.18	3.85	Putative metabolite	C13H25N1O6S1	0.49	N-Nonanoylglycine C11H21N1O3 + O3S1 -> C11H21N1O6S1 + C2H4 -> C13H25N1O6S1
5135	267.078	11.76	4.01	Putative metabolite	C9H17N1O6S1	-0.53	N-Nonanoylglycine C11H21N1O3 + O3S1 -> C11H21N1O6S1 - C2H4 -> C9H17N1O6S1
5139	198.046	6.63	3.84	Putative metabolite	C6F1H12O4P1	0.12	Isoflurophate C6F1H14O3P1 + C1O2 -> C7F1H14O5P1 - C1H2O1 -> C6F1H12O4P1
5141	344.206	8.21	3.95	Putative metabolite	C15H28N4O5	-0.09	Norophthalmic acid C10H17N3O6 + H3N1O-1 -> C10H20N4O5 + C5H8 -> C15H28N4O5
5143	342.103	16.86	3.83	Putative metabolite	C10H22N4O5S2	0.76	glutathione C10H17N3O6S1 + H2S1 -> C10H19N3O6S2 + H3N1O-1 -> C10H22N4O5S2
5151	427.134	11.38	4.02	Putative metabolite	C16H21N5O9	-0.17	hypoxanthine C5H4N4O1 + C11H17N1O8 -> C16H21N5O9
5153	354.227	15.1	3.93	Putative metabolite	C17H30N4O4	-0.55	Neuromedin B (1-3) C12H22N4O5 + C5H8 -> C17H30N4O5 - O1 -> C17H30N4O4
5157	168.006	12.45	3.87	Putative metabolite	C7H4O5	1.03	2-Amino-3-carboxymuconic acid semialdehyde C7H7N1O5 - H3N1 -> C7H4O5
5166	294.036	17.95	4.01	Putative metabolite	C17Cl1F1H8N2	0.35	N1-(2-Hydroxyethyl)flurazepam C18Cl1F1H16N2O2 - H2O1 -> C18Cl1F1H14N2O1 - H2 -> C18Cl1F1H12N2O1 - H2 -> C18Cl1F1H10N2O1 - C1H2O1 -> C17Cl1F1H8N2
5170	454.026	8.65	3.78	Putative metabolite	C13H15N2O14P1	0.42	SAICAR C13H19N4O12P1 + H-1N-1O1 -> C13H18N3O13P1 - H3N1O-1 -> C13H15N2O14P1
5174	252.082	17.42	3.96	Putative metabolite	C13H16O3S1	0.85	Polystyrene sulfonate C8H8O3S1 + C5H8 -> C13H16O3S1
5177	194.034	7.09	4	Putative metabolite	C6H11O5P1	1.08	11Z-Eicosenoic acid C20H38O2 + C2H2O1 -> C22H40O3 + H1O3P1 -> C22H41O6P1 - C16H30O1 -> C6H11O5P1
5182	250.051	4.89	3.67	Putative metabolite	C11H11N2O3P1	-0.29	tryptophan C11H12N2O2 + H1O3P1 -> C11H13N2O5P1 - O1 -> C11H13N2O4P1 - H2O1 -> C11H11N2O3P1
5184	217.052	9.82	3.76	Putative metabolite	C7H11N3O3S1	0.52	(S)-N-(4,5-Dihydro-1-methyl-4-oxo-1H-imidazol-2-yl)alanine C7H11N3O3 + S1 -> C7H11N3O3S1
5187	368.165	16.25	3.95	Putative metabolite	C20F1H29O1S2	-1.4	Tipredane C22F1H31O2S2 - C2H2O1 -> C20F1H29O1S2
5201	360.1	17.18	3.84	Putative metabolite	C22H16O5	-0.35	Fluorescein C20H12O5 + C2H4 -> C22H16O5
5207	356.105	16.33	3.68	Putative metabolite	C23H16O4	0.45	Pamoic acid C23H16O5 - O1 -> C23H16O4
5215	317.159	12.13	3.95	Putative metabolite	C13H23N3O6	-0.36	Ophthalmic acid C11H19N3O6 + C2H4 -> C13H23N3O6
5223	256.042	9.87	3.92	Putative metabolite	C13Cl2H14O1	-0.12	Chlorambucil C14Cl2H19N1O2 - C1H2O1 -> C13Cl2H17N1O1 - H3N1 -> C13Cl2H14O1
5233	269.149	14.97	3.88	Putative metabolite	C11H19N5O3	0.33	Homoanserine C11H18N4O3 + H1N1 -> C11H19N5O3
5234	271.044	5.46	3.71	Putative metabolite	C9H9N3O7	-0.19	5-Acetylamino-6-formylamino-3-methyluracil C8H10N4O4 + C1O2 -> C9H10N4O6 + H-1N-1O1 -> C9H9N3O7
5236	248.173	17.29	4	Putative metabolite	C11H24N2O4	0.43	Isoleucyl-Valine C11H22N2O3 + H2O1 -> C11H24N2O4
5242	171.101	12.7	3.82	Putative metabolite	C7H13N3O2	0.45	L-Histidinol C6H11N3O1 + C1H2O1 -> C7H13N3O2
5243	371.14	8.85	3.65	Putative metabolite	C17H25N1O6S1	0.43	Cyclopentolate C17H25N1O3 + O3S1 -> C17H25N1O6S1
5246	384.237	7.82	3.74	Putative metabolite	C18H32N4O5	-0.08	Neuromedin B (1-3) C12H22N4O5 + C5H8 -> C17H30N4O5 + C1H2 -> C18H32N4O5
5249	411.223	15.04	3.81	Putative metabolite	C17H29N7O5	0.04	1,7-Dimethylguanosine C12H17N5O5 + H1N1 -> C12H18N6O5 + C5H8 -> C17H26N6O5 + H3N1 -> C17H29N7O5
5266	332.036	8.77	3.84	Putative metabolite	C16Cl1F1H10N2O3	0.9	N-Desalkyl flurazepam C15Cl1F1H10N2O1 + C1O2 -> C16Cl1F1H10N2O3
5273	178.095	6.15	3.72	Putative metabolite	C6H14N2O4	0.88	Alanyl-Serine C6H12N2O4 + H2 -> C6H14N2O4
5276	295.037	8.83	3.81	Putative metabolite	C10H17N1O3S3	0.19	1-Isothiocyanato-8-(methylthio)octane C10H19N1S2 + O3S1 -> C10H19N1O3S3 - H2 -> C10H17N1O3S3
5280	370.222	8.39	3.71	Putative metabolite	C17H30N4O5	0.05	Neuromedin B (1-3) C12H22N4O5 + C5H8 -> C17H30N4O5
5283	215.138	18.05	3.9	Putative metabolite	C8H17N5O2	-0.35	N-Acetyl-L-arginine C8H16N4O3 - H-1N-1O1 -> C8H17N5O2
5289	197.082	13.82	4.5	Putative metabolite	C6H16N1O4P1	0.99	Phosphodimethylethanolamine C4H12N1O4P1 + C2H4 -> C6H16N1O4P1
5292	380.179	11.73	4.43	Putative metabolite	C15H28N2O9	0.21	Meprobamate C9H18N2O4 + C6H10O5 -> C15H28N2O9
5323	367.222	8.54	3.75	Putative metabolite	C17H29N5O4	-0.12	Histidinyl-Lysine C12H21N5O3 + C5H8 -> C17H29N5O3 + O1 -> C17H29N5O4
5328	313.139	12.53	3.85	Putative metabolite	C12H19N5O5	0.06	1,7-Dimethylguanosine C12H17N5O5 + H2 -> C12H19N5O5
5335	370.058	17.28	3.68	Putative metabolite	C9H17N5O7P1S1	0.35	7-methylguanosine C11H16N5O5 + H2S1 -> C11H18N5O5S1 - C2H2O1 -> C9H16N5O4S1 + H1O3P1 -> C9H17N5O7P1S1
5337	261.057	7.17	3.73	Putative metabolite	C12H11N3O2S1	0.37	Sinalexin C10H8N2O1S1 + C2H2O1 -> C12H10N2O2S1 + H1N1 -> C12H11N3O2S1
5338	132.045	10.85	3.78	Putative metabolite	C8H6N1O1	0.29	Aminochrome o-semiquinone C8H8N1O2 - H2O1 -> C8H6N1O1
5342	233.02	7.19	4.19	Putative metabolite	C4H11N1O8S1	1.02	{[2,3,4-trihydroxy-5-(hydroxymethyl)oxolan-2-yl]methoxy}sulfonic acid C6H12O9S1 + H3N1O-1 -> C6H15N1O8S1 - C2H4 -> C4H11N1O8S1
5353	368.217	14.96	3.89	Putative metabolite	C16H28N6O4	-0.53	Kyotorphin C15H23N5O4 + H3N1O-1 -> C15H26N6O3 + C1H2O1 -> C16H28N6O4
5360	212.007	11.14	4.61	Putative metabolite	C7H4N2O6	0.64	Orotic acid C5H4N2O4 + C1O1 -> C6H4N2O5 + C1O1 -> C7H4N2O6
5375	187.053	8.86	3.67	Putative metabolite	C5H9N5O1S1	-0.1	FAPy-adenine C5H7N5O1 + H2S1 -> C5H9N5O1S1
5381	326.205	8.53	3.7	Putative metabolite	C13H30N2O7	0	Hexaethylene glycol C12H26O7 + C1O1 -> C13H26O8 + H1N1 -> C13H27N1O8 + H3N1O-1 -> C13H30N2O7
5385	164.022	11.1	4.06	Putative metabolite	C7H4N2O3	0.56	4-Acetyl-2(3H)-benzoxazolone C9H7N1O3 + H1N1 -> C9H8N2O3 - C2H4 -> C7H4N2O3
5412	267.042	8.82	3.58	Putative metabolite	C9H17N1O2S3	0.9	S-Acetyldihydrolipoamide C10H19N1O2S2 + S1 -> C10H19N1O2S3 - C1H2 -> C9H17N1O2S3
5413	220.014	13.88	4.87	Putative metabolite	C7H9O6P1	0.34	Benzoyl phosphate C7H7O5P1 + H2O1 -> C7H9O6P1
5418	275.019	14.22	3.89	Putative metabolite	C9H10N1O7P1	0.68	N-Acetyltyrosine C11H13N1O4 + H1O3P1 -> C11H14N1O7P1 - C2H4 -> C9H10N1O7P1
5425	427.134	3.09	4.52	Putative metabolite	C22F2H19N3O4	0.38	Sarafloxacin C20F2H17N3O3 + C2H2O1 -> C22F2H19N3O4
5426	300.18	15.3	3.68	Putative metabolite	C13H24N4O4	-0.15	L-Acetopine C8H16N4O4 + C5H8 -> C13H24N4O4
5428	284.091	5.04	4.64	Putative metabolite	C14H12N4O3	0.14	Metabolite M6 C30H42N4O4 - C16H30O1 -> C14H12N4O3
5429	322.191	6.96	3.84	Putative metabolite	C15H31O5P1	-0.59	Pentadecanoic acid C15H30O2 + H1O3P1 -> C15H31O5P1
5432	192.045	16.24	3.51	Putative metabolite	C10Cl1H9N2	0.14	chondroitin sulfate E (GalNAc4,6diS-GlcA) proteoglycan C10Cl1H10N3 - H1N1 -> C10Cl1H9N2
5450	288.191	19.02	3.83	Putative metabolite	C11H24N6O3	0.31	Arginyl-Valine C11H23N5O3 + H1N1 -> C11H24N6O3
5464	427.134	14.87	4.04	Putative metabolite	C22F2H19N3O4	0.61	Sarafloxacin C20F2H17N3O3 + C2H2O1 -> C22F2H19N3O4
5465	427.134	14.33	4.02	Putative metabolite	C16H21N5O9	0.06	hypoxanthine C5H4N4O1 + C11H17N1O8 -> C16H21N5O9
5476	195.085	6.17	3.51	Putative metabolite	C5H13N3O5	0.62	N-carbamoyl-L-aspartate C5H8N2O5 + H2O1 -> C5H10N2O6 + H3N1O-1 -> C5H13N3O5
5487	275.028	14.43	4.37	Putative metabolite	C10H13N1O4S2	1.09	biotin C10H16N2O3S1 + S1 -> C10H16N2O3S2 - H3N1O-1 -> C10H13N1O4S2
5500	257.137	8.11	3.54	Putative metabolite	C11H19N3O4	0.22	Epsilon-(gamma-Glutamyl)-lysine C11H21N3O5 - H2O1 -> C11H19N3O4
5522	284.118	2.13	5.92	Putative metabolite	C14H21O4P1	-0.19	Iprobenfos C13H21O3P1S1 + C1O1 -> C14H21O4P1S1 - S1 -> C14H21O4P1
5530	240.047	14.07	5.43	Putative metabolite	C12H8N4S1	-0.14	Sulfaquinoxaline C14H12N4O2S1 - H2O1 -> C14H10N4O1S1 - C2H2O1 -> C12H8N4S1
5532	351.02	10.5	3.58	Putative metabolite	C10H13N3O7S2	-0.31	Dyphylline C10H14N4O4 - H3N1 -> C10H11N3O4 + O3S1 -> C10H11N3O7S1 + H2S1 -> C10H13N3O7S2
5534	765.514	4.48	4.69	Putative metabolite	C39H76N1O11P1	1.7	PS(16:0/16:0) C38H74N1O10P1 + C1H2O1 -> C39H76N1O11P1
5537	285.04	11.05	3.61	Putative metabolite	C15H9O6	1.1	2-(3,4-dihydroxyphenyl)-3,5,7-trihydroxy-5H-chromen-5-yl C15H11O6 - H2 -> C15H9O6
5545	344.242	12.66	3.51	Putative metabolite	C16H32N4O4	0.16	Val-Val-Val C15H29N3O4 + C1H2O1 -> C16H31N3O5 - H-1N-1O1 -> C16H32N4O4
5551	286.053	11.83	4.24	Putative metabolite	C14Cl2H16O2	0.12	Chlorambucil C14Cl2H19N1O2 - H3N1 -> C14Cl2H16O2
5568	369.11	7.6	3.97	Putative metabolite	C13H23N1O9S1	-0.4	(2R,2'S)-Isobuteine C7H13N1O4S1 + C6H10O5 -> C13H23N1O9S1
5580	226.097	4.22	5.52	Putative metabolite	C8H19O5P1	0.49	1-(sn-Glycero-3-phospho)-1D-myo-inositol C9H19O11P1 - C6H8O6 -> C3H11O5P1 + C5H8 -> C8H19O5P1
5581	226.097	3	5.13	Putative metabolite	C8H19O5P1	0.49	1-(sn-Glycero-3-phospho)-1D-myo-inositol C9H19O11P1 - C6H8O6 -> C3H11O5P1 + C5H8 -> C8H19O5P1

## Sheet: full annotations
peak_id	medMz	medRt	log10_inten	class	formula	ppm_error	annotation
1	282.256	2.44	9	Metabolite	C18H34O2	0.28	Oleic acid C18H34O2
2	256.24	2.47	8.66	Metabolite	C16H32O2	0.51	Palmitic acid C16H32O2
3	254.225	2.48	8.66	Metabolite	C16H30O2	-0.08	Hypogeic acid C16H30O2
4	89.0476	13.01	8.65	Metabolite	C3H7N1O2	0.88	alanine C3H7N1O2
5	144.115	4.21	8.45	Metabolite	C8H16O2	0.9	Caprylic acid C8H16O2
6	144.115	2.82	8.33	Metabolite	C8H16O2	0.9	Caprylic acid C8H16O2
7	284.271	2.43	8.43	Metabolite	C18H36O2	1.16	Stearic acid C18H36O2
8	147.053	13.5	8.42	Metabolite	C5H9N1O4	1.07	glutamate C5H9N1O4
9	147.053	9.98	6.61	Metabolite	C5H9N1O4	0.39	O-acetyl-L-serine C5H9N1O4
10	283.259	2.44	8.3	Artifact	[13]C1C17H34O2	0.48	Oleic acid C18H34O2 + [13]C1C-1 -> [13]C1C17H34O2
11	157.998	13.89	8.31	Artifact	C4H7K1O4	0.89	CH3COOK C2H3K1O2 + C2H4O2
12	122.037	4.21	8.2	Metabolite	C7H6O2	0.65	Benzoic acid C7H6O2
13	146.069	11.29	5.4	Metabolite	C5H10N2O3	0.29	L-Glutamine C5H10N2O3
14	174.112	16.77	8.19	Metabolite	C6H14N4O2	1.01	L-Arginine C6H14N4O2
15	175.095	13.64	8.06	Metabolite	C6H13N3O3	1.09	citrulline C6H13N3O3
16	116.084	4.24	7.94	Metabolite	C6H12O2	0.25	Caproic acid C6H12O2
17	116.084	3.01	7.37	Metabolite	C6H12O2	0.25	4-Methylvaleric acid C6H12O2
18	257.243	2.47	7.9	Artifact	[13]C1C15H32O2	0.33	Palmitic acid C16H32O2 + [13]C1C-1 -> [13]C1C15H32O2
19	255.228	2.48	7.91	Artifact	[13]C1C15H30O2	0.14	Hypogeic acid C16H30O2 + [13]C1C-1 -> [13]C1C15H30O2
20	206.167	2.58	7.83	Metabolite	C14H22O1	0.8	4-(1,1,3,3-Tetramethylbutyl)-phenol C14H22O1
21	132.09	13.64	7.85	Metabolite	C5H12N2O2	0.59	Ornithine C5H12N2O2
22	132.09	16.24	7.34	Metabolite	C5H12N2O2	0.59	ornithine C5H12N2O2
23	132.09	16.78	7.34	Metabolite	C5H12N2O2	0.59	ornithine C5H12N2O2
24	132.092	9.84	4.83	Artifact	[15]N1C6H13O2	0.48	isoleucine C6H13N1O2 + [15]N1N-1 -> [15]N1C6H13O2
25	132.092	9.29	4.77	Artifact	[15]N1C6H13O2	0.48	leucine C6H13N1O2 + [15]N1N-1 -> [15]N1C6H13O2
26	285.275	2.44	7.72	Artifact	[13]C1C17H36O2	0.65	Stearic acid C18H36O2 + [13]C1C-1 -> [13]C1C17H36O2
27	152.068	7.19	7.7	Metabolite	C5H12O5	1.14	Ribitol C5H12O5
28	192.027	14.18	7.67	Metabolite	C6H8O7	0.01	citrate/isocitrate C6H8O7
29	119.058	13.01	7.66	Metabolite	C4H9N1O3	0.36	threonine C4H9N1O3
30	240.067	2.62	7.47	Putative metabolite	C8H16O6S1	-0.59	7-Hydroxyoctanoic acid C8H16O3 + O3S1 -> C8H16O6S1
31	117.079	11.21	7.61	Metabolite	C5H11N1O2	-0.18	DL-Valine C5H11N1O2
32	166.048	2.56	7.34	Metabolite	C5H10O6	-1.58	Arabinonic acid C5H10O6
33	166.048	2.84	7.34	Metabolite	C5H10O6	-1.58	Arabinonic acid C5H10O6
34	317.124	13.58	7.55	Artifact	C10H24N1O8P1	0.48	Glycerophosphocholine C8H20N1O6P1 + C2H4O2 -> C10H24N1O8P1
35	88.016	4.2	7.42	Metabolite	C3H4O3	0.84	pyruvate C3H4O3
36	88.016	3.02	6.59	Artifact	C3H4O3	0.61	L-(?)-3-Phenyllactic acid C9H10O3 - Library_MS2_fragment -> C3H4O3
37	88.016	4.95	7.25	Metabolite	C3H4O3	0.61	Pyruvic acid C3H4O3
38	159.137	14.71	3.99	Artifact	C7H17N3O1	1.65	Glycyl-Lysine C8H17N3O3 - C1O2 -> C7H17N3O1
39	134.021	13.54	7.48	Metabolite	C4H6O5	0.92	malate C4H6O5
40	145.118	4.21	7.41	Artifact	[13]C1C7H16O2	1.27	Caprylic acid C8H16O2 + [13]C1C-1 -> [13]C1C7H16O2
41	145.118	2.82	7.28	Artifact	[13]C1C7H16O2	0.58	Caprylic acid C8H16O2 + [13]C1C-1 -> [13]C1C7H16O2
42	233.891	13.84	7.34	Artifact	H3K1O8S2	0.17	KHSO4 H1K1O4S1 + H2O4S1
43	195.944	13.85	7.36	Artifact	C2H5K1O6S1	0.97	KHSO4 H1K1O4S1 + C2H4O2
44	314.086	2.6	7.14	Putative metabolite	C11H14N4O7	1.43	Xanthine C5H4N4O2 + C6H10O5 -> C11H14N4O7
45	314.088	14	5.31	Artifact	C11H19K1N2O6	-0.26	Saccharopine C11H20N2O6 + H-1K1 -> C11H19K1N2O6
46	446.194	2.78	7.3	Metabolite	C24H30O8	-0.07	Estrone glucuronide C24H30O8
47	402.137	13.88	7.19	Artifact	C14H26O13	0.1	Lactose C12H22O11 + C2H4O2 -> C14H26O13
48	402.137	14.82	6.65	Artifact	C14H26O13	0.1	Melibiose C12H22O11 + C2H4O2 -> C14H26O13
49	312.176	2.08	7.31	Metabolite	C17H28O3S1	-0.27	N-Undecylbenzenesulfonic acid C17H28O3S1
50	103.063	13.5	7.32	Artifact	C4H9N1O2	0.28	glutamate C5H9N1O4 - C1O2 -> C4H9N1O2
51	103.063	12.17	6.6	Metabolite	C4H9N1O2	0.28	b-Aminoisobutyric acid C4H9N1O2
52	307.084	13.5	7.21	Metabolite	C10H17N3O6S1	0.02	glutathione C10H17N3O6S1
53	170.131	2.71	7.26	Metabolite	C10H18O2	0.47	cis-4-Decenoic acid C10H18O2
54	170.131	4.16	6.68	Metabolite	C10H18O2	0.47	cis-4-Decenoic acid C10H18O2
55	129.043	13.49	7.26	Artifact	C5H7N1O3	-0.05	glutamate C5H9N1O4 - H2O1 -> C5H7N1O3
56	129.043	10.34	6.47	Metabolite	C5H7N1O3	-0.05	Pyroglutamic acid C5H7N1O3
57	129.042	11.15	6.92	Metabolite	C5H7N1O3	0.72	Pyroglutamic acid C5H7N1O3
58	326.192	2.08	7.22	Metabolite	C18H30O3S1	0.2	2-Dodecylbenzenesulfonic acid C18H30O3S1
59	300.266	2.64	7.25	Metabolite	C18H36O3	0.15	(R)-3-Hydroxy-Octadecanoic acid C18H36O3
60	300.266	4.19	6.64	Metabolite	C18H36O3	0.15	(R)-3-Hydroxy-Octadecanoic acid C18H36O3
61	242.225	2.48	7.25	Metabolite	C15H30O2	-0.08	Pentadecanoic acid C15H30O2
62	284.263	2.44	7.22	Artifact	[13]C2C16H34O2	-2.85	Oleic acid C18H34O2 + [13]C1C-1 -> [13]C1C17H34O2 + [13]C1C-1 -> [13]C2C16H34O2
63	131.095	9.84	7.23	Metabolite	C6H13N1O2	0.98	isoleucine C6H13N1O2
64	131.095	9.31	7.14	Metabolite	C6H13N1O2	0.98	leucine C6H13N1O2
65	90.0509	13.01	7.2	Artifact	[13]C1C2H7N1O2	1.48	alanine C3H7N1O2 + [13]C1C-1 -> [13]C1C2H7N1O2
66	159.996	13.89	7.18	Artifact	[41]K1C4H7O4	1	CH3COOK C2H3K1O2 + C2H4O2 + [41]K1K-1 -> [41]K1C4H7O4
67	133.037	13.58	7.19	Metabolite	C4H7N1O4	0.81	aspartate C4H7N1O4
68	133.037	11.29	6.78	Metabolite	C4H7N1O4	0.81	L-Aspartic acid C4H7N1O4
69	148.056	13.5	7.17	Artifact	[13]C1C4H9N1O4	2.11	glutamate C5H9N1O4 + [13]C1C-1 -> [13]C1C4H9N1O4
70	165.079	8.83	7.17	Metabolite	C9H11N1O2	0.48	phenylalanine C9H11N1O2
71	165.079	13.39	5.38	Metabolite	C9H11N1O2	0.48	L-Phenylalanine C9H11N1O2
72	242.08	4.24	7.02	Putative metabolite	C12H10N4O2	0.31	Metabolite M6 C30H42N4O4 - C16H30O1 -> C14H12N4O3 - C2H2O1 -> C12H10N4O2
73	242.079	2.37	6.37	Putative metabolite	C12H18O1S2	1.68	2,5-Dimethyl-3-(methyldithio)furan C7H10O1S2 + C5H8 -> C12H18O1S2
74	166.063	4.2	7.1	Artifact	C9H10O3	1.17	4-Hydroxystyrene C8H8O1 + C1H2O2 -> C9H10O3
75	166.063	2.85	6.63	Metabolite	C9H10O3	1.17	L-(?)-3-Phenyllactic acid C9H10O3
76	350.191	13.65	7.08	Artifact	C12H26N6O6	-0.05	citrulline C6H13N3O3 * 2 -> C12H26N6O6
77	310.287	2.41	7.05	Metabolite	C20H38O2	-0.06	11Z-Eicosenoic acid C20H38O2
78	249.087	2.35	7.05	Artifact	C12H17O3.5S1	0.39	No edge connections.
79	249.087	3.31	5.59	Artifact	C11.5H15O6	-1.35	Eucaglobulin C23H30O12 / 2 -> C11.5H15O6
80	123.04	4.21	7.08	Artifact	[13]C1C6H6O2	1.09	Benzoic acid C7H6O2 + [13]C1C-1 -> [13]C1C6H6O2
81	123.04	2.93	6.16	Unknown	Unknown	0.67	Unknown
82	207.17	2.58	7.02	Artifact	[13]C1C13H22O1	0.58	4-(1,1,3,3-Tetramethylbutyl)-phenol C14H22O1 + [13]C1C-1 -> [13]C1C13H22O1
83	152.047	2.92	7.13	Metabolite	C8H8O3	0.95	3-Hydroxyphenylacetic acid C8H8O3
84	340.207	2.07	7.02	Putative metabolite	C19H32O3S1	0.05	N-Undecylbenzenesulfonic acid C17H28O3S1 + C2H4 -> C19H32O3S1
85	270.256	2.46	6.99	Metabolite	C17H34O2	-0.07	Heptadecanoic acid C17H34O2
86	147.072	13.39	7.03	Artifact	[13]C1C4H10N2O3	2.7	glutamine C5H10N2O3 + [13]C1C-1 -> [13]C1C4H10N2O3
87	188.08	11.29	7.01	Artifact	C7H12N2O4	0.57	Peak 3989 C14H24N4O8 / 2 -> C7H12N2O4
88	331.877	13.87	7.02	Artifact	C4H7K3O8S1	-0.05	KHSO4 H1K1O4S1 + C2H3K1O2 + C2H3K1O2 -> C4H7K3O8S1
89	255.975	13.9	6.98	Artifact	C6H10K2O6	0.2	CH3COOK C2H3K1O2 + C2H4O2 + C2H3K1O2 -> C6H10K2O6
90	182.079	11.81	7.02	Metabolite	C6H14O6	0.21	Galactitol C6H14O6
91	175.115	16.77	7.02	Artifact	[13]C1C5H14N4O2	1.32	L-Arginine C6H14N4O2 + [13]C1C-1 -> [13]C1C5H14N4O2
92	612.152	14.19	6.98	Metabolite	C20H32N6O12S2	-0.23	glutathione disulfide C20H32N6O12S2
93	564.512	2.44	6.88	Artifact	C36H68O4	-0.07	Oleic acid C18H34O2 * 2 -> C36H68O4
94	183.017	13.42	6.95	Putative metabolite	C7H5N1O5	0.4	4-Nitrophenol C6H5N1O3 + C1O2 -> C7H5N1O5
95	159.001	13.89	6.96	Artifact	[13]C1C3H7K1O4	1.23	CH3COOK C2H3K1O2 + C2H4O2 + [13]C1C-1 -> [13]C1C3H7K1O4
96	224.036	2.57	6.82	Putative metabolite	C7H12O6S1	-0.63	Quinic acid C7H12O6 + S1 -> C7H12O6S1
97	136.052	4.21	6.92	Metabolite	C8H8O2	0.22	Phenylacetic acid C8H8O2
98	136.052	2.88	6.22	Artifact	C8H8O2	0.22	L-(?)-3-Phenyllactic acid C9H10O3 - C1H2O1 -> C8H8O2
99	258.183	2.63	6.92	Metabolite	C14H26O4	0.04	Tetradecanedioic acid C14H26O4
100	258.183	4.07	5.96	Metabolite	C14H26O4	0.04	Tetradecanedioic acid C14H26O4
101	176.08	11.3	6.93	Artifact	C6H12N2O4	0.61	L-2-Amino-4-methylenepentanedioic acid C6H9N1O4 + H3N1 -> C6H12N2O4
102	176.079	12.17	5.2	Metabolite	C6H12N2O4	1.18	Alanyl-Serine C6H12N2O4
103	177.046	7.14	6.96	Metabolite	C6H11N1O3S1	0.93	N-Formyl-L-methionine C6H11N1O3S1
104	233.9	13.86	6.91	Artifact	C2H4K2O6S1	0.74	KHSO4 H1K1O4S1 + C2H3K1O2
105	128.059	13.38	6.9	Artifact	C5H8N2O2	0.61	glutamine C5H10N2O3 - H2O1 -> C5H8N2O2
106	132.053	13.4	6.91	Metabolite	C4H8N2O3	0.7	asparagine C4H8N2O3
107	132.053	12.53	5.21	Metabolite	C4H8N2O3	0.7	Ureidopropionic acid C4H8N2O3
108	176.099	13.64	6.89	Artifact	[13]C1C5H13N3O3	1.4	citrulline C6H13N3O3 + [13]C1C-1 -> [13]C1C5H13N3O3
109	298.16	2.1	6.87	Putative metabolite	C16H26O3S1	0.22	N-Undecylbenzenesulfonic acid C17H28O3S1 - C1H2 -> C16H26O3S1
110	175.084	12.24	6.89	Metabolite	C7H13N1O4	0.9	N-Carboxyethyl-g-aminobutyric acid C7H13N1O4
111	175.084	11.24	5.04	Metabolite	C7H13N1O4	0.9	N-Carboxyethyl-g-aminobutyric acid C7H13N1O4
112	132.079	4.21	6.83	Artifact	C6H12O3	0.34	Hexyl glucoside C12H24O6 / 2 -> C6H12O3
113	132.079	2.94	6	Metabolite	C6H12O3	0.33	2-Hydroxycaproic acid C6H12O3
114	309.802	13.85	6.83	Artifact	H1K3O8S2	0.01	KHSO4 H1K1O4S1 + H2O4S1 + H-2K2 -> H1K3O8S2
115	243.087	13.59	6.85	Putative metabolite	C7H18N1O6P1	0.3	Glycerylphosphorylethanolamine C5H14N1O6P1 + C2H4 -> C7H18N1O6P1
116	243.087	14.35	6.56	Artifact	C7H18N1O6P1	0.3	Phosphorylcholine C5H14N1O4P1 + C2H4O2 -> C7H18N1O6P1
117	243.087	13.08	5.46	Putative metabolite	C7H18N1O6P1	0.3	Glycerylphosphorylethanolamine C5H14N1O6P1 + C2H4 -> C7H18N1O6P1
118	243.085	9.27	5.45	Metabolite	C9H13N3O5	0.08	cytidine C9H13N3O5
119	117.087	4.23	6.77	Artifact	[13]C1C5H12O2	0.72	Caproic acid C6H12O2 + [13]C1C-1 -> [13]C1C5H12O2
120	117.087	3.01	6.18	Artifact	[13]C1C5H12O2	0.72	4-Methylvaleric acid C6H12O2 + [13]C1C-1 -> [13]C1C5H12O2
121	246.978	13.51	6.82	Artifact	C5Cr1H9N1O7	0.85	glutamate C5H9N1O4 + Cr1O3 -> C5Cr1H9N1O7
122	258.247	2.47	6.76	Artifact	[13]C2C14H32O2	-0.23	Palmitic acid C16H32O2 + [13]C1C-1 -> [13]C1C15H32O2 + [13]C1C-1 -> [13]C2C14H32O2
123	136.038	7.66	6.85	Metabolite	C5H4N4O1	0.08	hypoxanthine C5H4N4O1
124	226.069	2.84	6.69	Metabolite	C7H14O8	-1.47	2,3,4,5,6,7-Hexahydroxyheptanoic acid C7H14O8
125	222.067	14.18	6.82	Metabolite	C7H14N2O4S1	0.58	cystathionine C7H14N2O4S1
126	348.223	16.77	6.82	Artifact	C12H28N8O4	0.15	L-Arginine C6H14N4O2 * 2 -> C12H28N8O4
127	268.24	2.46	6.74	Metabolite	C17H32O2	0.11	Cyclohexaneundecanoic acid C17H32O2
128	241.07	2.62	6.23	Artifact	[13]C1C7H16O6S1	-0.36	2-Hydroxyoctanoic acid C8H16O3 + O3S1 + [13]C1C-1 -> [13]C1C7H16O6S1
129	342.116	14.83	6.55	Metabolite	C12H22O11	0.03	Melibiose C12H22O11
130	342.116	13.88	6.61	Metabolite	C12H22O11	0.03	Lactose C12H22O11
131	314.246	2.51	6.72	Artifact	C18H34O4	0.03	Hypogeic acid C16H30O2 + C2H4O2 -> C18H34O4
132	314.246	4.22	5.96	Metabolite	C18H34O4	-0.29	Octadecanedioic acid C18H34O4
133	440.084	13.84	6.43	Artifact	C12H24O15S1	-0.25	Lactose C12H22O11 + H2O4S1 -> C12H24O15S1
134	440.084	14.83	4.12	Artifact	C14Ca1H24O13	0.41	Melibiose C12H22O11 + C2Ca1H2O2 -> C14Ca1H24O13
135	293.921	13.86	6.75	Artifact	C4H8K2O8S1	-0.33	CH3COOK C2H3K1O2 + C2H4O2 + H1K1O4S1 -> C4H8K2O8S1
136	271.846	13.85	6.75	Artifact	H2K2O8S2	0.45	KHSO4 H1K1O4S1 + H1K1O4S1
137	139.027	13.42	6.75	Metabolite	C6H5N1O3	0.31	4-Nitrophenol C6H5N1O3
138	447.197	2.78	6.7	Artifact	[13]C1C23H30O8	0.05	Estrone glucuronide C24H30O8 + [13]C1C-1 -> [13]C1C23H30O8
139	378.244	2.44	6.67	Artifact	C18H38O6Si1	-0.36	Oleic acid C18H34O2 + H4O4Si1 -> C18H38O6Si1
140	538.496	2.46	6.6	Metabolite	C34H66O4	0.39	FAHFA(16:0/9-O-18:0) C34H66O4
141	105.043	13.45	6.73	Metabolite	C3H7N1O3	-0.07	serine C3H7N1O3
142	268.081	8.68	6.75	Metabolite	C10H12N4O5	0.26	inosine C10H12N4O5
143	300.088	2.65	6.53	Artifact	C10H20O8S1	-0.37	2-Hydroxyoctanoic acid C8H16O3 + O3S1 + C2H4O2 -> C10H20O8S1
144	607.081	13.75	6.65	Metabolite	C17H27N3O17P2	0.44	Uridine diphosphate-N-acetylglucosamine C17H27N3O17P2
145	215.056	13.62	6.71	Artifact	C5H14N1O6P1	0.34	Phosphodimethylethanolamine C4H12N1O4P1 + C1H2O2 -> C5H14N1O6P1
146	116.928	13.01	6.71	Unknown	Unknown	0.7	Unknown
147	116.928	13.39	6.71	Unknown	Unknown	0.7	Unknown
148	266.188	2.58	6.69	Artifact	C16H26O3	0.36	4-(1,1,3,3-Tetramethylbutyl)-phenol C14H22O1 + C2H4O2 -> C16H26O3
149	162.053	13.06	6.71	Metabolite	C6H10O5	0.76	2-Hydroxyhexanedioic Acid C6H10O5
150	92.0473	7.06	6.71	Metabolite	C3H8O3	0.26	Glycerol C3H8O3
151	306.076	14.19	6.69	Artifact	C10H16N3O6S1	-0.06	glutathione disulfide C20H32N6O12S2 / 2 -> C10H16N3O6S1
152	566.528	2.43	6.54	Metabolite	C36H70O4	-0.16	FAHFA(18:0/9-O-18:0) C36H70O4
153	280.24	2.46	6.64	Metabolite	C18H32O2	0.11	Linoleic acid C18H32O2
154	300.209	2.51	6.45	Metabolite	C20H28O2	0.77	Retinoic Acid C20H28O2
155	75.032	13.34	6.69	Metabolite	C2H5N1O2	0.38	glycine C2H5N1O2
156	75.0319	13.01	6.69	Metabolite	C2H5N1O2	1.71	glycine C2H5N1O2
157	181.074	10.76	6.7	Metabolite	C9H11N1O3	0.51	tyrosine C9H11N1O3
158	291.183	2.56	6.63	Metabolite	C17H25N1O3	0.15	Cyclopentolate C17H25N1O3
159	291.183	3.81	5.77	Metabolite	C17H25N1O3	0.15	Cyclopentolate C17H25N1O3
160	159.053	11.33	6.66	Metabolite	C6H9N1O4	0.99	L-2-Amino-4-methylenepentanedioic acid C6H9N1O4
161	159.053	13.38	5.55	Artifact	C6H9N1O4	0.99	Methylmalonic acid C4H6O4 + C2H3N1 -> C6H9N1O4
162	342.277	2.44	6.63	Artifact	C20H38O4	0.03	Oleic acid C18H34O2 + C2H4O2 -> C20H38O4
163	131.058	9.04	6.68	Metabolite	C5H9N1O3	1.09	4-Hydroxyproline C5H9N1O3
164	131.058	12.68	5.38	Metabolite	C5H9N1O3	1.09	hydroxyproline C5H9N1O3
165	165.065	7.72	6.68	Metabolite	C6H7N5O1	0.97	7-Methylguanine C6H7N5O1
166	165.064	10.38	4.2	Putative metabolite	C5H11N1O5	0.74	glutamate C5H9N1O4 + H2O1 -> C5H11N1O5
167	217.106	11.3	6.64	Artifact	C8H15N3O4	0.72	L-2-Amino-4-methylenepentanedioic acid C6H9N1O4 + H3N1 -> C6H12N2O4 + C2H3N1 -> C8H15N3O4
168	217.106	12.34	5.4	Metabolite	C8H15N3O4	0.72	N-a-Acetylcitrulline C8H15N3O4
169	217.106	11.97	5.4	Artifact	C8H15N3O4	0.72	Asparaginyl-Glutamic acid C9H15N3O6 - C1O2 -> C8H15N3O4
170	234.162	2.53	6.48	Metabolite	C15H22O2	0.34	Valerenic acid C15H22O2
171	347.063	13.73	6.65	Metabolite	C10H14N5O7P1	-0.05	dGMP C10H14N5O7P1
172	353.952	13.89	6.55	Artifact	C8H13K3O8	-0.1	CH3COOK C2H3K1O2 + C2H4O2 + C2H3K1O2 -> C6H10K2O6 + C2H3K1O2 -> C8H13K3O8
173	295.91	13.92	6.59	Artifact	C5H7K3O7	0.33	KHCO3 C1H1K1O3 + C2H3K1O2 + C2H3K1O2 -> C5H7K3O7
174	137.024	2.92	6.4	Putative metabolite	C7H5O3	0.5	Aminochrome o-semiquinone C8H8N1O2 + H-1N-1O1 -> C8H7O3 - C1H2 -> C7H5O3
175	315.089	2.52	5.89	Putative metabolite	C20H13N1O3	0.77	Sanguinarine C20H13N1O4 - O1 -> C20H13N1O3
176	566.055	13.94	6.57	Metabolite	C15H24N2O17P2	0.04	UDP-D-glucose C15H24N2O17P2
177	134.058	7.77	6.64	Metabolite	C5H10O4	0.07	2,3-Dihydroxyvaleric acid C5H10O4
178	318.127	13.58	6.59	Artifact	[13]C1C9H24N1O8P1	0.34	Glycerophosphocholine C8H20N1O6P1 + C2H4O2 -> C10H24N1O8P1 + [13]C1C-1 -> [13]C1C9H24N1O8P1
179	161.069	10.76	6.49	Metabolite	C6H11N1O4	0.67	Aminoadipic acid C6H11N1O4
180	565.515	2.44	6.47	Artifact	[13]C1C35H68O4	0.03	Oleic acid C18H34O2 * 2 -> C36H68O4 + [13]C1C-1 -> [13]C1C35H68O4
181	159.977	13.91	6.57	Artifact	C3H5K1O5	1.28	KHCO3 C1H1K1O3 + C2H4O2
182	313.179	2.09	6.57	Artifact	[13]C1C16H28O3S1	-0.41	N-Undecylbenzenesulfonic acid C17H28O3S1 + [13]C1C-1 -> [13]C1C16H28O3S1
183	242.064	2.63	6.45	Putative metabolite	C7H14O9	0.34	2,3,4,5,6,7-Hexahydroxyheptanoic acid C7H14O8 + O1 -> C7H14O9
184	386.173	2.78	6.52	Metabolite	C22H26O6	-0.68	Porson C22H26O6
185	152.033	9.02	6.62	Metabolite	C5H4N4O2	2.14	Xanthine C5H4N4O2
186	160.11	4.22	6.5	Metabolite	C8H16O3	1.53	7-Hydroxyoctanoic acid C8H16O3
187	160.11	2.71	6.19	Metabolite	C8H16O3	0.9	2-Hydroxyoctanoic acid C8H16O3
188	160.11	3.78	5.89	Metabolite	C8H16O3	0.9	7-Hydroxyoctanoic acid C8H16O3
189	282.107	2.44	6.58	Artifact	Ring_artifact_C18H34O2	0.38	Oleic acid C18H34O2 + Ring_artifact -> Ring_artifact_C18H34O2
190	167.048	2.57	6.34	Unknown	Unknown	0.54	Unknown
191	167.048	2.84	6.34	Unknown	Unknown	0.54	Unknown
192	133.093	13.64	6.59	Artifact	[13]C1C4H12N2O2	1	Ornithine C5H12N2O2 + [13]C1C-1 -> [13]C1C4H12N2O2
193	133.093	16.24	6.08	Artifact	[13]C1C4H12N2O2	1	ornithine C5H12N2O2 + [13]C1C-1 -> [13]C1C4H12N2O2
194	133.093	16.78	6.06	Artifact	[13]C1C4H12N2O2	0.24	ornithine C5H12N2O2 + [13]C1C-1 -> [13]C1C4H12N2O2
195	369.814	13.84	6.49	Artifact	H4K2O12S3	0	KHSO4 H1K1O4S1 + H2O4S1 + H1K1O4S1 -> H4K2O12S3
196	173.069	11.26	6.56	Metabolite	C7H11N1O4	0.62	N-Acetyl-L-glutamate 5-semialdehyde C7H11N1O4
197	173.069	10.33	6.07	Metabolite	C7H11N1O4	0.62	N-Acetyl-L-glutamate 5-semialdehyde C7H11N1O4
198	135.923	13.85	6.55	Artifact	H1K1O4S1	0.45	KHSO4 H1K1O4S1
199	171.051	13	6.55	Artifact	C5H10N1Na1O4	0.31	alanine C3H7N1O2 + C2H3Na1O2 -> C5H10N1Na1O4
200	171.051	14.44	4.64	Unknown	Unknown	0.53	Unknown
201	104.011	13.39	6.54	Metabolite	C3H4O4	-0.4	Malonic acid C3H4O4
202	176.068	11.97	6.4	Metabolite	C7H12O5	0.42	2-Isopropylmalic acid C7H12O5
203	245.075	11.81	6.56	Artifact	C6H15N1O9	0.74	Galactitol C6H14O6 + H1N1O3 -> C6H15N1O9
204	245.073	9.6	5.19	Artifact	[13]C1C8H12N2O6	0.78	Uridine C9H12N2O6 + [13]C1C-1 -> [13]C1C8H12N2O6
205	245.075	11.36	6.51	Artifact	C6H15N1O9	0.74	Galactitol C6H14O6 + H1N1O3 -> C6H15N1O9
206	301.27	2.63	6.54	Artifact	[13]C1C17H36O3	0.33	(R)-3-Hydroxy-Octadecanoic acid C18H36O3 + [13]C1C-1 -> [13]C1C17H36O3
207	301.27	4.18	5.89	Artifact	[13]C1C17H36O3	0.33	(R)-3-Hydroxy-Octadecanoic acid C18H36O3 + [13]C1C-1 -> [13]C1C17H36O3
208	241.066	2.62	6.64	Unknown	Unknown	0.42	Unknown
209	316.261	2.47	6.5	Artifact	C18H36O4	0.19	Palmitic acid C16H32O2 + C2H4O2 -> C18H36O4
210	316.261	4.22	6.18	Metabolite	C18H36O4	0.19	MG(0:0/15:0/0:0) C18H36O4
211	316.261	2.75	6.5	Metabolite	C18H36O4	0.19	MG(0:0/15:0/0:0) C18H36O4
212	311.942	13.9	6.46	Artifact	C6H11K3O7	-0.33	CH3COOK C2H3K1O2 + C2H4O2 + C2H3K1O2 -> C6H10K2O6 + H1K1O1 -> C6H11K3O7
213	189.064	13.26	6.53	Metabolite	C7H11N1O5	0.65	Glutarylglycine C7H11N1O5
214	95.0371	13.42	6.54	Metabolite	C5H5N1O1	0.25	2-hydroxypyridine C5H5N1O1
215	143.982	13.89	6.51	Artifact	C3H5K1O4	0.63	C2H4O2 C2H4O2 + C1H1K1O2
216	292.138	13.38	6.53	Artifact	C10H20N4O6	-0.05	glutamine C5H10N2O3 * 2 -> C10H20N4O6
217	327.195	2.08	6.5	Artifact	[13]C1C17H30O3S1	-0.24	2-Dodecylbenzenesulfonic acid C18H30O3S1 + [13]C1C-1 -> [13]C1C17H30O3S1
218	89.0193	4.97	5.81	Artifact	[13]C1C2H4O3	0.66	Pyruvic acid C3H4O3 + [13]C1C-1 -> [13]C1C2H4O3
219	307.065	7.59	6.51	Artifact	C9H13N3O9	-0.07	uridine C9H12N2O6 + H1N1O3 -> C9H13N3O9
220	307.065	9.61	5.23	Artifact	C9H13N3O9	-0.07	Uridine C9H12N2O6 + H1N1O3 -> C9H13N3O9
221	89.0739	13	6.49	Artifact	Ring_artifact_C3H7N1O2	1.09	alanine C3H7N1O2 + Ring_artifact -> Ring_artifact_C3H7N1O2
222	451.27	7.09	6.44	Metabolite	C21H42N1O7P1	-0.25	LysoPE(0:0/16:1(9Z)) C21H42N1O7P1
223	451.27	3.07	6.16	Metabolite	C21H42N1O7P1	-0.25	LysoPE(0:0/16:1(9Z)) C21H42N1O7P1
224	319.215	2.49	6.47	Metabolite	C19H29N1O3	0.14	Homocapsaicin C19H29N1O3
225	319.215	3.72	5.35	Metabolite	C19H29N1O3	0.14	Homocapsaicin C19H29N1O3
226	432.198	13.61	6.46	Artifact	C14H33N4O9P1	0.27	citrulline C6H13N3O3 + Peak 1326 -> C14H33N4O9P1
227	403.141	13.88	6.33	Artifact	[13]C1C13H26O13	-0.01	Lactose C12H22O11 + C2H4O2 -> C14H26O13 + [13]C1C-1 -> [13]C1C13H26O13
228	403.141	14.83	5.79	Artifact	[13]C1C13H26O13	-0.26	Melibiose C12H22O11 + C2H4O2 -> C14H26O13 + [13]C1C-1 -> [13]C1C13H26O13
229	536.48	2.47	6.41	Artifact	C34H64O4	0.67	Cyclohexaneundecanoic acid C17H32O2 * 2 -> C34H64O4
230	322.095	13.68	6.49	Putative metabolite	C10H18N4O6S1	0.33	glutathione C10H17N3O6S1 + H1N1 -> C10H18N4O6S1
231	249.589	2.35	6.46	Artifact	[13]C0.5C11.5H17O3.5S1	0.3	No edge connections.
232	249.589	3.33	4.97	Artifact	[13]C0.5C11H15O6	-1.44	Eucaglobulin C23H30O12 / 2 -> C11.5H15O6 + [13]C0.5C-0.5 -> [13]C0.5C11H15O6
233	146.058	7.18	6.51	Metabolite	C6H10O4	0.06	2-Methylglutaric acid C6H10O4
234	146.105	16.92	6.49	Metabolite	C6H14N2O2	0.87	L-Lysine C6H14N2O2
235	918.553	2.45	6.4	Unknown	Unknown	0.23	Unknown
236	133.074	11.3	6.48	Metabolite	C5H11N1O3	0.7	L-2-Amino-5-hydroxypentanoic acid C5H11N1O3
237	133.074	13.23	3.95	Metabolite	C5H11N1O3	0.7	L-2-Amino-5-hydroxypentanoic acid C5H11N1O3
238	316.083	2.57	6.23	Putative metabolite	C10H20O9S1	0.64	Arabinopyranobiose C10H18O9 + H2S1 -> C10H20O9S1
239	243.228	2.48	6.44	Artifact	[13]C1C14H30O2	-0.27	Pentadecanoic acid C15H30O2 + [13]C1C-1 -> [13]C1C14H30O2
240	150.017	2.57	6.26	Artifact	C4.5H8O3.5S1	1.15	Peak 472 C9H16O7S2 / 2 -> C4.5H8O3.5S1
241	218.09	13.58	6.49	Artifact	C8H14N2O5	0.79	citrulline C6H13N3O3 - H3N1 -> C6H10N2O3 + C2H4O2 -> C8H14N2O5
242	218.09	10.21	4.37	Metabolite	C8H14N2O5	0.79	Glutamylalanine C8H14N2O5
243	218.09	10.93	4.32	Metabolite	C8H14N2O5	0.79	Glutamylalanine C8H14N2O5
244	314.12	13.37	6.47	Artifact	C10H19N4Na1O6	-0.23	glutamine C5H10N2O3 + Peak 550 -> C10H19N4Na1O6
245	314.121	11.54	5.22	Artifact	C11H22O10	-0.33	Galactosylglycerol C9H18O8 + C2H4O2 -> C11H22O10
246	314.121	12.15	5.31	Artifact	C11H22O10	-0.33	Galactosylglycerol C9H18O8 + C2H4O2 -> C11H22O10
247	89.0218	13.02	6.47	Artifact	Ring_artifact_C3H7N1O2	1.09	alanine C3H7N1O2 + Ring_artifact -> Ring_artifact_C3H7N1O2
248	215.152	4.21	6.4	Metabolite	C11H21N1O3	0.2	N-Nonanoylglycine C11H21N1O3
249	215.152	2.81	6.18	Metabolite	C11H21N1O3	0.2	N-Nonanoylglycine C11H21N1O3
250	148.074	5.74	6.11	Metabolite	C6H12O4	-0.28	Mevalonic acid C6H12O4
251	244.088	9.06	6.47	Metabolite	C10H16N2O3S1	1.08	biotin C10H16N2O3S1
252	244.09	13.57	5.65	Artifact	[13]C1C6H18N1O6P1	0.94	Peak 115 C7H18N1O6P1 + [13]C1C-1 -> [13]C1C6H18N1O6P1
253	244.09	14.35	5.37	Artifact	[13]C1C6H18N1O6P1	0.53	Phosphorylcholine C5H14N1O4P1 + C2H4O2 -> C7H18N1O6P1 + [13]C1C-1 -> [13]C1C6H18N1O6P1
254	184.978	13.5	6.45	Artifact	C4Cr1H7N1O4	1.16	2-Pyrrolidinone C4H7N1O1 + Cr1O3 -> C4Cr1H7N1O4
255	171.035	2.81	6.25	Metabolite	C7H9N1O2S1	0.58	2-(4-Methyl-5-thiazolyl)ethyl formate C7H9N1O2S1
256	153.072	7.18	6.46	Artifact	[13]C1C4H12O5	0.84	Ribitol C5H12O5 + [13]C1C-1 -> [13]C1C4H12O5
257	510.464	2.47	6.35	Metabolite	C32H62O4	0.61	Propylene glycol mono- and diesters of fats and fatty acids C32H62O4
258	282.407	2.44	6.55	Artifact	Ring_artifact_C18H34O2	0.38	Oleic acid C18H34O2 + Ring_artifact -> Ring_artifact_C18H34O2
259	311.291	2.41	6.39	Artifact	[13]C1C19H38O2	0.11	11Z-Eicosenoic acid C20H38O2 + [13]C1C-1 -> [13]C1C19H38O2
260	118.063	4.22	6.35	Metabolite	C5H10O3	0.8	2-Hydroxyvaleric acid C5H10O3
261	118.063	5.28	6.2	Metabolite	C5H10O3	-0.05	3-Hydroxy-2-methyl-[R-(R,S)]-butanoic acid C5H10O3
262	266.115	2.79	6.4	Metabolite	C14H18O5	0.46	3',4',5'-Trimethoxycinnamyl alcohol acetate C14H18O5
263	404.156	13.55	6.36	Artifact	C13H29N2O10P1	0.2	Peak 3049 C11H26N1O10P1 + C2H3N1 -> C13H29N2O10P1
264	168.045	2.65	6.19	Unknown	Unknown	0.53	Unknown
265	316.088	13.49	6.35	Artifact	C10H17N2Na1O8	-0.13	L-beta-aspartyl-L-threonine C8H14N2O6 + C2H3Na1O2 -> C10H17N2Na1O8
266	185.035	13.01	6.41	Artifact	C3H11N1O6Si1	0.88	alanine C3H7N1O2 + H4O4Si1 -> C3H11N1O6Si1
267	289.127	13.47	6.38	Metabolite	C11H19N3O6	0.3	Ophthalmic acid C11H19N3O6
268	174.064	11.31	6.34	Artifact	C6H10N2O4	0.9	L-Aspartic acid C4H7N1O4 + C2H3N1 -> C6H10N2O4
269	327.118	7.63	6.39	Artifact	C12H17N5O6	-0.05	Adenosine C10H13N5O4 + C2H4O2 -> C12H17N5O6
270	327.117	11.25	4.16	Putative metabolite	C11H21N1O10	-0.47	Galactose-beta-1,4-xylose C11H20O10 + H1N1 -> C11H21N1O10
271	200.077	13	6.37	Artifact	C6H13N2Na1O4	0.51	alanine C3H7N1O2 * 2 -> C6H14N2O4 + H-1Na1 -> C6H13N2Na1O4
272	407.779	13.85	6.37	Artifact	C2H4K4O10S2	0.04	KHSO4 H1K1O4S1 + H2O4S1 + H-2K2 -> H1K3O8S2 + C2H3K1O2 -> C2H4K4O10S2
273	663.109	13.92	6.36	Metabolite	C21H27N7O14P2	-0.12	NAD C21H27N7O14P2
274	204.09	8.72	6.39	Metabolite	C11H12N2O2	0.38	tryptophan C11H12N2O2
275	230.152	2.6	6.34	Metabolite	C12H22O4	0.47	Dodecanedioic acid C12H22O4
276	479.301	7.09	6.3	Artifact	C23H46N1O7P1	0.19	LysoPA(0:0/18:0) C21H43O7P1 + C2H3N1 -> C23H46N1O7P1
277	479.301	3.07	6.15	Metabolite	C23H46N1O7P1	0.19	LysoPE(0:0/18:1(11Z)) C23H46N1O7P1
278	192.063	13.02	6.35	Artifact	C7H12O6	0.46	2-Methylsuccinic acid C5H8O4 + C2H4O2 -> C7H12O6
279	192.063	12.07	5.67	Metabolite	C7H12O6	0.46	N-acetyl-glutamate C7H12O6
280	228.072	13.39	6.36	Artifact	C7H13N2Na1O5	0.51	glutamine C5H10N2O3 + C2H3Na1O2 -> C7H13N2Na1O5
281	228.072	14.44	4.28	Putative metabolite	C13H12N2S1	-0.35	1-Methyl-3-(2-thiazolyl)-1H-indole C12H10N2S1 + C1H2 -> C13H12N2S1
282	350.212	2.49	6.27	Artifact	C16H34O6Si1	-0.1	Hypogeic acid C16H30O2 + H4O4Si1 -> C16H34O6Si1
283	244.069	7.6	6.36	Metabolite	C9H12N2O6	0.56	uridine C9H12N2O6
284	244.069	9.61	6.25	Metabolite	C9H12N2O6	0.56	Uridine C9H12N2O6
285	119.03	13.31	6.35	Artifact	[13]C1C3H6O4	0.53	Methylmalonic acid C4H6O4 + [13]C1C-1 -> [13]C1C3H6O4
286	175.109	16.78	6.37	Artifact	[15]N1C6H14N3O2	0.63	L-Arginine C6H14N4O2 + [15]N1N-1 -> [15]N1C6H14N3O2
287	407.77	13.85	6.29	Artifact	H3K3O12S3	-0.29	KHSO4 H1K1O4S1 + H1K1O4S1 + H1K1O4S1 -> H3K3O12S3
288	341.211	2.06	6.32	Artifact	[13]C1C18H32O3S1	0.21	Peak 84 C19H32O3S1 + [13]C1C-1 -> [13]C1C18H32O3S1
289	506.995	14.24	6.28	Metabolite	C10H16N5O13P3	0.68	ATP C10H16N5O13P3
290	149.056	8.86	4.46	Artifact	[13]C1C8H8O2	-0.11	phenylalanine C9H11N1O2 + [13]C1C-1 -> [13]C1C8H11N1O2 - H3N1 -> [13]C1C8H8O2
291	149.057	9.98	4.5	Artifact	[18]O1C5H9N1O3	0.02	O-acetyl-L-serine C5H9N1O4 + [18]O1O-1 -> [18]O1C5H9N1O3
292	429.854	13.88	6.32	Artifact	C6H10K4O10S1	0.22	KHSO4 H1K1O4S1 + C2H3K1O2 + C2H3K1O2 -> C4H7K3O8S1 + C2H3K1O2 -> C6H10K4O10S1
293	171.134	2.7	6.3	Artifact	[13]C1C9H18O2	0.2	cis-4-Decenoic acid C10H18O2 + [13]C1C-1 -> [13]C1C9H18O2
294	171.134	4.17	5.7	Artifact	[13]C1C9H18O2	0.79	cis-4-Decenoic acid C10H18O2 + [13]C1C-1 -> [13]C1C9H18O2
295	298.287	2.4	6.3	Metabolite	C19H38O2	0.61	Nonadecanoic acid C19H38O2
296	333.876	13.87	6.3	Artifact	[41]K1C4H7K2O8S1	-0.89	KHSO4 H1K1O4S1 + C2H3K1O2 + C2H3K1O2 -> C4H7K3O8S1 + [41]K1K-1 -> [41]K1C4H7K2O8S1
297	118.082	11.21	6.35	Artifact	[13]C1C4H11N1O2	0.28	DL-Valine C5H11N1O2 + [13]C1C-1 -> [13]C1C4H11N1O2
298	254.353	2.49	6.29	Artifact	Ring_artifact_C16H30O2	0.41	Hypogeic acid C16H30O2 + Ring_artifact -> Ring_artifact_C16H30O2
299	254.352	3.41	4.14	Unknown	Unknown	0.41	Unknown
300	260.029	14.19	6.35	Metabolite	C6H13O9P1	0.84	glucose-1-phosphate C6H13O9P1
301	91.0518	13.02	6.33	Artifact	[18]O1C3H7N1O1	1.58	alanine C3H7N1O2 + [18]O1O-1 -> [18]O1C3H7N1O1
302	112.016	14.18	6.33	Metabolite	C5H4O3	0.39	3-Furoic acid C5H4O3
303	161.051	7.59	6.33	Metabolite	C6H11N1O2S1	0.93	trans-S-(1-Propenyl)-L-cysteine C6H11N1O2S1
304	120.061	13.01	6.31	Artifact	[13]C1C3H9N1O3	1.65	threonine C4H9N1O3 + [13]C1C-1 -> [13]C1C3H9N1O3
305	613.156	14.18	6.3	Artifact	[13]C1C19H32N6O12S2	-0.62	glutathione disulfide C20H32N6O12S2 + [13]C1C-1 -> [13]C1C19H32N6O12S2
306	308.087	13.49	6.21	Artifact	[13]C1C9H17N3O6S1	-0.13	glutathione C10H17N3O6S1 + [13]C1C-1 -> [13]C1C9H17N3O6S1
307	352.228	2.47	6.25	Artifact	C16H36O6Si1	-0.24	Palmitic acid C16H32O2 + H4O4Si1 -> C16H36O6Si1
308	352.228	2.04	5.77	Putative metabolite	C17H36O5S1	-0.44	Heptadecanoic acid C17H34O2 + O3S1 -> C17H34O5S1 + H2 -> C17H36O5S1
309	74.0367	13.31	6.31	Artifact	C3H6O2	0.53	Methylmalonic acid C4H6O4 - C1O2 -> C3H6O2
310	174.016	13.87	6.17	Metabolite	C6H6O6	1.37	Aconitic acid C6H6O6
311	153.051	2.93	6.08	Artifact	[13]C1C7H8O3	0.65	3-Hydroxyphenylacetic acid C8H8O3 + [13]C1C-1 -> [13]C1C7H8O3
312	173.105	7.09	6.24	Metabolite	C8H15N1O3	-0.04	N-Acetyl-L-leucine C8H15N1O3
313	169.035	13.51	6.28	Artifact	C5H8N1Na1O4	0.61	glutamate C5H9N1O4 + H-1Na1 -> C5H8N1Na1O4
314	157.085	16.77	6.34	Artifact	C6H11N3O2	0.17	L-Arginine C6H14N4O2 - H3N1 -> C6H11N3O2
315	553.338	7.09	6.23	Artifact	C26H52N1O9P1	0.49	Peak 588 C27H54N1O10P1 - C1H2O1 -> C26H52N1O9P1
316	553.338	3.07	5.66	Artifact	C26H52N1O9P1	0.49	LysoPE(0:0/20:1(11Z)) C25H50N1O7P1 + C1H2O2 -> C26H52N1O9P1
317	135.054	7.62	6.32	Metabolite	C5H5N5	-0.04	adenine C5H5N5
318	135.054	5.01	6.2	Metabolite	C5H5N5	-0.04	Adenine C5H5N5
319	135.054	14.96	5.83	Metabolite	C5H5N5	-0.04	Adenine C5H5N5
320	254.092	3.58	3.88	Putative metabolite	C9H19O6P1	-0.3	DHAP(8:0) C11H21O7P1 - C2H2O1 -> C9H19O6P1
321	273.07	11.51	5.21	Putative metabolite	C7H15N1O10	-0.02	Lactosamine C12H23N1O10 - C5H8 -> C7H15N1O10
322	273.07	8.08	4.65	Putative metabolite	C7H15N1O10	-0.02	Lactosamine C12H23N1O10 - C5H8 -> C7H15N1O10
323	273.07	7.74	4.65	Putative metabolite	C7H15N1O10	-0.02	Lactosamine C12H23N1O10 - C5H8 -> C7H15N1O10
324	273.07	10.81	4.36	Putative metabolite	C7H15N1O10	-0.02	Lactosamine C12H23N1O10 - C5H8 -> C7H15N1O10
325	273.07	12.44	4.3	Putative metabolite	C7H15N1O10	-0.02	Lactosamine C12H23N1O10 - C5H8 -> C7H15N1O10
326	254.152	2.7	6.24	Putative metabolite	C14H22O4	0.04	Epoxyeremopetasinorol C13H20O3 + C1H2O1 -> C14H22O4
327	254.152	4.17	5.81	Artifact	C14H22O4	0.04	Linalyl propionate C13H22O2 + C1H2O3 -> C14H24O5 - H2O1 -> C14H22O4
328	331.868	13.85	6.23	Artifact	C2H6K2O10S2	-1.05	KHSO4 H1K1O4S1 + H2O4S1 + C2H3K1O2 -> C2H6K2O10S2
329	500.114	13.88	6.29	Artifact	C16H29K1O15	0.1	Lactose C12H22O11 + C2H4O2 -> C14H26O13 + C2H3K1O2 -> C16H29K1O15
330	500.114	14.82	4.73	Artifact	C16H29K1O15	0.1	Melibiose C12H22O11 + C2H4O2 -> C14H26O13 + C2H3K1O2 -> C16H29K1O15
331	567.531	2.44	6.14	Artifact	[13]C1C35H70O4	-0.06	FAHFA(18:0/9-O-18:0) C36H70O4 + [13]C1C-1 -> [13]C1C35H70O4
332	238.091	13.66	6.28	Artifact	C6H14N4O6	0.56	citrulline C6H13N3O3 + H1N1O3 -> C6H14N4O6
333	238.091	14.11	6.06	Putative metabolite	C6H14N4O6	0.56	Ophthalmic acid C11H19N3O6 - C5H8 -> C6H11N3O6 + H3N1 -> C6H14N4O6
334	240.209	2.5	6.27	Artifact	C15H28O2	-0.29	Palmitic acid C16H32O2 - Library_MS2_fragment -> C15H28O2
335	198.047	14.2	6.01	Putative metabolite	C8H10N2O2S1	-3.54	Ethionamide sulphoxide C8H10N2O1S1 + O1 -> C8H10N2O2S1
336	273.073	13.76	6.27	Artifact	C8H16K1N3O5	0.38	citrulline C6H13N3O3 + C2H3K1O2 -> C8H16K1N3O5
337	819.316	2.52	6.19	Unknown	Unknown	0.24	Unknown
338	819.316	3.42	4.39	Unknown	Unknown	0.24	Unknown
339	242.07	2.57	5.39	Artifact	Ring_artifact_C15H30O2	0.42	Pentadecanoic acid C15H30O2 + Ring_artifact -> Ring_artifact_C15H30O2
340	344.293	2.43	6.2	Artifact	C20H40O4	-0.12	Stearic acid C18H36O2 + C2H4O2 -> C20H40O4
341	344.293	4.14	4.94	Metabolite	C20H40O4	0.17	10,20-Dihydroxyeicosanoic acid C20H40O4
342	427.029	14.01	6.24	Metabolite	C10H15N5O10P2	-0.2	dGDP C10H15N5O10P2
343	214.157	2.83	6.14	Metabolite	C12H22O3	-0.03	3-Oxododecanoic acid C12H22O3
344	144.061	7.16	4.7	Artifact	[13]C1C5H9N1O3	0.68	Vinylacetylglycine C6H9N1O3 + [13]C1C-1 -> [13]C1C5H9N1O3
345	144.169	3.72	4.07	Unknown	Unknown	0.6	Unknown
346	116.011	13.55	6.28	Artifact	C4H4O4	0.51	malate C4H6O5 - H2O1 -> C4H4O4
347	115.987	13.93	6.24	Artifact	C2H5K1O3	0.65	CH3OH C1H4O1 + C1H1K1O2
348	238.069	13.08	6.26	Metabolite	C8H14O8	0.28	3,4,5-trihydroxy-6-(2-hydroxyethoxy)oxane-2-carboxylic acid C8H14O8
349	270.219	4.21	5.88	Metabolite	C16H30O3	0.35	3-Oxohexadecanoic acid C16H30O3
350	890.522	2.49	6.17	Unknown	Unknown	0.23	Unknown
351	158.069	13.64	5.95	Artifact	C6H10N2O3	0.9	citrulline C6H13N3O3 - H3N1 -> C6H10N2O3
352	919.557	2.45	6.17	Unknown	Unknown	0.23	Unknown
353	331.858	13.85	6.12	Artifact	H5K1O12S3	-0.84	KHSO4 H1K1O4S1 + H2O4S1 + H2O4S1 -> H5K1O12S3
354	206.042	14.08	6.25	Metabolite	C7H10O7	0.74	2-Methylcitric acid C7H10O7
355	604.011	13.92	6.22	Artifact	C15H23K1N2O17P2	0.17	UDP-D-glucose C15H24N2O17P2 + H-1K1 -> C15H23K1N2O17P2
356	79.9663	14.2	6.22	Artifact	H1O3P1	0.5	H3PO4 H3O4P1 - H2O1 -> H1O3P1
357	243.084	4.23	6.1	Unknown	Unknown	0.42	Unknown
358	243.084	3.07	4.54	Unknown	Unknown	0.42	Unknown
359	243.084	3.6	4.45	Unknown	Unknown	0.42	Unknown
360	405.112	14.82	6.23	Artifact	C12H23N1O14	-0.11	Melibiose C12H22O11 + H1N1O3 -> C12H23N1O14
361	405.112	13.88	5.93	Artifact	C12H23N1O14	0.13	Lactose C12H22O11 + H1N1O3 -> C12H23N1O14
362	405.112	13.44	5.28	Putative metabolite	C12H23N1O14	0.13	1,4-beta-D-Glucan C18H32O18 - C6H10O5 -> C12H22O13 + O1 -> C12H22O14 + H1N1 -> C12H23N1O14
363	198.162	2.6	6.19	Artifact	C12H22O2	0.4	3-Hydroxydodecanoic acid C12H24O3 - H2O1 -> C12H22O2
364	198.162	2.19	6.09	Metabolite	C12H22O2	0.4	5Z-Dodecenoic acid C12H22O2
365	508.449	2.49	6.12	Metabolite	C32H60O4	0.71	FAHFA(16:1(9Z)/5-O-16:0) C32H60O4
366	159.946	13.08	5.85	Artifact	C2Cr1H4O5	1.13	CrO3 Cr1O3 + C2H4O2
367	197.942	13.85	6.2	Artifact	[41]K1C2H5O6S1	1.06	KHSO4 H1K1O4S1 + C2H4O2 + [41]K1K-1 -> [41]K1C2H5O6S1
368	223.142	11.22	6.17	Putative metabolite	C9H21N1O5	0.33	Tetraethylene glycol C8H18O5 + H1N1 -> C8H19N1O5 + C1H2 -> C9H21N1O5
369	167.051	2.57	5.97	Artifact	[13]C1C4H10O6	-1.24	Arabinonic acid C5H10O6 + [13]C1C-1 -> [13]C1C4H10O6
370	167.051	2.84	5.97	Artifact	[13]C1C4H10O6	-1.24	Arabinonic acid C5H10O6 + [13]C1C-1 -> [13]C1C4H10O6
371	256.115	16.76	6.24	Artifact	C8H17N4Na1O4	0.19	L-Arginine C6H14N4O2 + C2H3Na1O2 -> C8H17N4Na1O4
372	256.117	11.85	5.13	Metabolite	C10H16N4O4	0.21	2-(3-Carboxy-3-aminopropyl)-L-histidine C10H16N4O4
373	539.499	2.46	6.13	Artifact	[13]C1C33H66O4	0.68	FAHFA(16:0/9-O-18:0) C34H66O4 + [13]C1C-1 -> [13]C1C33H66O4
374	351.195	13.65	6.17	Artifact	[13]C1C11H26N6O6	0.11	citrulline C6H13N3O3 * 2 -> C12H26N6O6 + [13]C1C-1 -> [13]C1C11H26N6O6
375	892.538	2.48	6.12	Unknown	Unknown	0.23	Unknown
376	275.021	13.65	6.21	Artifact	C6Cr1H13N3O6	0.16	citrulline C6H13N3O3 + Cr1O3 -> C6Cr1H13N3O6
377	106.027	11.3	6.19	Metabolite	C3H6O4	0.08	Glyceric acid C3H6O4
378	253.9	13.92	6.13	Artifact	C3H5K3O6	0.13	KHCO3 C1H1K1O3 + C2H3K1O2 + H1K1O1 -> C3H5K3O6
379	257.099	13.64	6.2	Artifact	C8H16N3Na1O5	0.25	citrulline C6H13N3O3 + C2H3Na1O2 -> C8H16N3Na1O5
380	257.099	14.4	4.41	Putative metabolite	C14H15N3S1	-0.12	Isothipendyl C16H19N3S1 - C2H4 -> C14H15N3S1
381	393.887	13.91	6.08	Artifact	C7H10K4O9	-0.23	KHCO3 C1H1K1O3 + C2H3K1O2 + C2H3K1O2 -> C5H7K3O7 + C2H3K1O2 -> C7H10K4O9
382	319.103	13.57	6.15	Artifact	C9H22N1O9P1	0.37	Glycerophosphocholine C8H20N1O6P1 + C1H2O3 -> C9H22N1O9P1
383	146.997	13.51	6.18	Artifact	Ring_artifact_C5H9N1O4	0.59	glutamate C5H9N1O4 + Ring_artifact -> Ring_artifact_C5H9N1O4
384	160.002	13.89	6.22	Artifact	[18]O1C4H7K1O3	3.04	CH3COOK C2H3K1O2 + C2H4O2 + [18]O1O-1 -> [18]O1C4H7K1O3
385	380.259	2.43	6.07	Artifact	C18H40O6Si1	0.04	Stearic acid C18H36O2 + H4O4Si1 -> C18H40O6Si1
386	202.988	13.5	6.2	Artifact	C4Cr1H9N1O5	0.39	glutamate C5H9N1O4 - C1O2 -> C4H9N1O2 + Cr1O3 -> C4Cr1H9N1O5
387	245.994	13.39	6.2	Artifact	C5Cr1H10N2O6	0.79	glutamine C5H10N2O3 + Cr1O3 -> C5Cr1H10N2O6
388	216.172	2.62	6.13	Metabolite	C12H24O3	0.67	3-Hydroxydodecanoic acid C12H24O3
389	202.988	12.19	4.04	Artifact	C4Cr1H9N1O5	0.39	b-Aminoisobutyric acid C4H9N1O2 + Cr1O3 -> C4Cr1H9N1O5
390	147.066	13.39	6.17	Artifact	Ring_artifact_C5H9N1O4	0.59	glutamate C5H9N1O4 + Ring_artifact -> Ring_artifact_C5H9N1O4
391	495.26	7.1	6.08	Putative metabolite	C22H42N1O9P1	0.04	LysoPE(0:0/16:1(9Z)) C21H42N1O7P1 + C1O2 -> C22H42N1O9P1
392	237.868	13.93	6.09	Artifact	C2H1K3O6	0.56	KHCO3 C1H1K1O3 + C1H2O3 + H-2K2 -> C2H1K3O6
393	144.06	4.21	6.23	Artifact	Ring_artifact_C8H16O2	0.6	Caprylic acid C8H16O2 + Ring_artifact -> Ring_artifact_C8H16O2
394	144.061	2.82	6.11	Artifact	Ring_artifact_C8H16O2	0.6	Caprylic acid C8H16O2 + Ring_artifact -> Ring_artifact_C8H16O2
395	177.064	13.38	6.19	Artifact	C6H11N1O5	1.26	Oxoadipic acid C6H8O5 + H3N1 -> C6H11N1O5
396	216.122	13.38	6.15	Metabolite	C8H16N4O3	1.11	N-Acetyl-L-arginine C8H16N4O3
397	497.185	13.89	5.89	Putative metabolite	C18H31N3O13	0.38	Serylthreonine C7H14N2O5 + C11H17N1O8 -> C18H31N3O13
398	497.186	14.83	4.93	Putative metabolite	C18H31N3O13	-0.02	Serylthreonine C7H14N2O5 + C11H17N1O8 -> C18H31N3O13
399	225.035	2.62	5.96	Unknown	Unknown	0.44	Unknown
400	304.24	2.49	6.05	Metabolite	C20H32O2	0.43	Arachidonic acid C20H32O2
401	146.119	4.21	6.07	Artifact	[18]O1C8H16O1	0.52	Caprylic acid C8H16O2 + [18]O1O-1 -> [18]O1C8H16O1
402	146.119	2.82	5.95	Artifact	[18]O1C8H16O1	0.52	Caprylic acid C8H16O2 + [18]O1O-1 -> [18]O1C8H16O1
403	305.068	13.48	6.12	Artifact	C10H15N3O6S1	-0.14	Dimethylglycine C4H9N1O2 + Peak 452 -> C10H15N3O6S1
404	305.068	13.02	5.98	Artifact	C10H15N3O6S1	0.18	S-Formylglutathione C11H17N3O7S1 - C1H2O1 -> C10H15N3O6S1
405	305.068	12.23	4.65	Artifact	B1C6H17N1O10P1	0.37	Mannitol-1-phosphate C6H15O9P1 + H3N1 + B1H-1O1 -> B1C6H17N1O10P1
406	512.48	2.47	6.02	Artifact	C32H64O4	0.51	Palmitic acid C16H32O2 * 2 -> C32H64O4
407	280.046	7.59	6.14	Artifact	C9Cl1H13N2O6	0.41	uridine C9H12N2O6 + Cl1H1 -> C9Cl1H13N2O6
408	251.152	2.05	6	Putative metabolite	C14H21N1O3	0.17	Homocapsaicin C19H29N1O3 - C5H8 -> C14H21N1O3
409	251.152	2.61	5.17	Artifact	C14H21N1O3	-0.22	Peak 326 C14H22O4 - C1H2O1 -> C13H20O3 + C1H1N1 -> C14H21N1O3
410	276.132	14.01	6.13	Metabolite	C11H20N2O6	0.13	Saccharopine C11H20N2O6
411	250.062	13.39	6.08	Metabolite	C8H14N2O5S1	0.57	gamma-Glutamylcysteine C8H14N2O5S1
412	158.058	10.19	5.93	Metabolite	C7H10O4	1.32	Succinylacetone C7H10O4
413	537.484	2.47	6.02	Artifact	[13]C1C33H64O4	0.4	Cyclohexaneundecanoic acid C17H32O2 * 2 -> C34H64O4 + [13]C1C-1 -> [13]C1C33H64O4
414	166.082	8.83	6.17	Artifact	[13]C1C8H11N1O2	1.41	phenylalanine C9H11N1O2 + [13]C1C-1 -> [13]C1C8H11N1O2
415	236.178	2.52	6.11	Artifact	C15H24O2	0.13	4-(1,1,3,3-Tetramethylbutyl)-phenol C14H22O1 + C2H4O2 -> C16H26O3 - C1H2O1 -> C15H24O2
416	257.973	13.89	6.11	Artifact	[41]K1C6H10K1O6	-0.11	CH3COOK C2H3K1O2 + C2H4O2 + [41]K1K-1 -> [41]K1C4H7O4 + C2H3K1O2 -> [41]K1C6H10K1O6
417	132.042	13.08	6.13	Metabolite	C5H8O4	1.2	2-Methylsuccinic acid C5H8O4
418	197.08	11.28	6.13	Metabolite	C8H11N3O3	0.72	N-Acetylhistidine C8H11N3O3
419	328.261	2.43	6.12	Artifact	C19H36O4	-0.12	Oleic acid C18H34O2 + C1H2O2 -> C19H36O4
420	229.056	13.5	6.12	Artifact	C7H12N1Na1O6	0.14	glutamate C5H9N1O4 + C2H3Na1O2 -> C7H12N1Na1O6
421	229.056	14.44	4.05	Putative metabolite	C13H11N1O1S1	-0.28	6-Methoxy-3-(2-thiazolyl)-1H-indole C12H10N2O1S1 - H1N1 -> C12H9N1O1S1 + C1H2 -> C13H11N1O1S1
422	282.404	2.44	6.47	Artifact	Ring_artifact_C18H34O2	0.38	Oleic acid C18H34O2 + Ring_artifact -> Ring_artifact_C18H34O2
423	204.136	4.2	6.11	Artifact	C10H20O4	0.29	Caprylic acid C8H16O2 + C2H4O2 -> C10H20O4
424	204.136	2.82	5.98	Metabolite	C10H20O4	0.29	(2xi,6xi)-7-Methyl-3-methylene-1,2,6,7-octanetetrol C10H20O4
425	299.164	2.1	6.1	Artifact	[13]C1C15H26O3S1	0.07	Peak 109 C16H26O3S1 + [13]C1C-1 -> [13]C1C15H26O3S1
426	315.249	2.5	5.99	Artifact	[13]C1C17H34O4	-0.43	Hypogeic acid C16H30O2 + [13]C1C-1 -> [13]C1C15H30O2 + C2H4O2 -> [13]C1C17H34O4
427	315.249	4.21	5.24	Artifact	[13]C1C17H34O4	-0.43	Octadecanedioic acid C18H34O4 + [13]C1C-1 -> [13]C1C17H34O4
428	315.249	3.7	4.39	Unknown	Unknown	0.36	Unknown
429	146.021	12.86	6.12	Artifact	C5H6O5	0.84	Ascorbic acid C6H8O6 - C1H2O1 -> C5H6O5
430	285.266	2.44	5.92	Artifact	[13]C3C15H34O2	-1.25	Oleic acid C18H34O2 + [13]C1C-1 -> [13]C1C17H34O2 + [13]C1C-1 -> [13]C2C16H34O2 + [13]C1C-1 -> [13]C3C15H34O2
431	242.152	2.19	6.08	Metabolite	C13H22O4	0.04	2-Carboxy-4-dodecanolide C13H22O4
432	232.106	13.41	6.1	Artifact	C9H16N2O5	0.95	Glycylproline C7H12N2O3 + C2H4O2 -> C9H16N2O5
433	445.726	13.85	6.08	Artifact	H2K4O12S3	0.37	KHSO4 H1K1O4S1 + H2O4S1 + H-2K2 -> H1K3O8S2 + H1K1O4S1 -> H2K4O12S3
434	176.093	13.64	6.11	Artifact	[15]N1C6H13N2O3	0.72	citrulline C6H13N3O3 + [15]N1N-1 -> [15]N1C6H13N2O3
435	89.0356	13.01	5.56	Artifact	Ring_artifact_C3H7N1O2	1.09	alanine C3H7N1O2 + Ring_artifact -> Ring_artifact_C3H7N1O2
436	311.801	13.85	6.05	Artifact	[41]K1H1K2O8S2	-0.25	KHSO4 H1K1O4S1 + H1K1O4S1 + H-1K1 -> H1K3O8S2 + [41]K1K-1 -> [41]K1H1K2O8S2
437	167.066	4.2	6.08	Artifact	[13]C1C8H10O3	0.89	4-Hydroxystyrene C8H8O1 + C1H2O2 -> C9H10O3 + [13]C1C-1 -> [13]C1C8H10O3
438	167.066	2.86	5.59	Artifact	[13]C1C8H10O3	0.89	L-(?)-3-Phenyllactic acid C9H10O3 + [13]C1C-1 -> [13]C1C8H10O3
439	169.05	14.35	6.09	Metabolite	C4H12N1O4P1	0.56	Phosphodimethylethanolamine C4H12N1O4P1
440	169.05	13.58	4.92	Metabolite	C4H12N1O4P1	1.15	Phosphodimethylethanolamine C4H12N1O4P1
441	175.051	6.01	6.13	Artifact	C9H7N2O2	0.87	tryptophan C11H12N2O2 - C2H4 - H1 -> C9H7N2O2
442	315.085	2.57	6.39	Putative metabolite	C15H13N3O5	0.38	5'-Hydroxypiroxicam C15H13N3O5S1 - S1 -> C15H13N3O5
443	135.025	13.54	6.12	Artifact	[13]C1C3H6O5	0.58	malate C4H6O5 + [13]C1C-1 -> [13]C1C3H6O5
444	259.186	2.63	6.07	Artifact	[13]C1C13H26O4	0.63	Tetradecanedioic acid C14H26O4 + [13]C1C-1 -> [13]C1C13H26O4
445	259.186	4.05	5.1	Artifact	[13]C1C13H26O4	0.63	Tetradecanedioic acid C14H26O4 + [13]C1C-1 -> [13]C1C13H26O4
446	111.993	13.7	6.08	Artifact	C1H5O4P1	0.4	Methylphosphate C1H5O4P1
447	89.0209	13.02	6.49	Artifact	Ring_artifact_C3H7N1O2	1.09	alanine C3H7N1O2 + Ring_artifact -> Ring_artifact_C3H7N1O2
448	139.004	13.93	6.13	Artifact	C4H6K1N1O2	0.43	CH3CN C2H3N1 + C2H3K1O2
449	138.068	3.03	6.05	Artifact	C8H10O2	0.58	L-(?)-3-Phenyllactic acid C9H10O3 - Library_MS2_fragment -> C8H10O2
450	226.015	4.22	5.78	Unknown	Unknown	0.44	Unknown
451	226.015	3.07	5.71	Putative metabolite	C6H10O7S1	-0.78	citrate/isocitrate C6H8O7 + H2S1 -> C6H10O7S1
452	202.005	13.39	6.09	Artifact	C4Cr1H10N2O4	0.32	glutamine C5H10N2O3 + Cr1O3 -> C5Cr1H10N2O6 - C1O2 -> C4Cr1H10N2O4
453	100.016	13.31	6.06	Metabolite	C4H4O3	0.44	Succinic anhydride C4H4O3
454	408.245	16.77	6.05	Artifact	C14H32N8O6	-0.05	L-Arginine C6H14N4O2 + Peak 1180 -> C14H32N8O6
455	290.123	14.19	6.03	Metabolite	C10H18N4O6	-0.23	Argininosuccinic acid C10H18N4O6
456	555.317	3.07	6.02	Artifact	C25H50N1O10P1	0.06	1-Oleoylglycerophosphoserine C24H46N1O9P1 + C1H4O1 -> C25H50N1O10P1
457	555.317	7.09	5.86	Artifact	C25H50N1O10P1	-0.12	1-Oleoylglycerophosphoserine C24H46N1O9P1 + C1H4O1 -> C25H50N1O10P1
458	645.038	13.77	5.96	Artifact	C17H26K1N3O17P2	-0.08	Uridine diphosphate-N-acetylglucosamine C17H27N3O17P2 + H-1K1 -> C17H26K1N3O17P2
459	303.541	13.75	6.05	Artifact	C8.5H13.5N1.5O8.5P1	0.28	Uridine diphosphate-N-acetylglucosamine C17H27N3O17P2 / 2 -> C8.5H13.5N1.5O8.5P1
460	294.106	13.5	6.02	Artifact	C10H18N2O8	0.05	glutamate C5H9N1O4 * 2 -> C10H18N2O8
461	230.163	7.08	5.99	Metabolite	C11H22N2O3	0.62	Isoleucyl-Valine C11H22N2O3
462	183.994	13.4	6.06	Artifact	C4Cr1H8N2O3	0.54	glutamine C5H10N2O3 + Cr1O3 -> C5Cr1H10N2O6 - C1O2 -> C4Cr1H10N2O4 - H2O1 -> C4Cr1H8N2O3
463	891.526	2.49	5.94	Unknown	Unknown	0.23	Unknown
464	306.578	14.19	6.03	Artifact	[13]C0.5C9.5H16N3O6S1	-0.46	glutathione disulfide C20H32N6O12S2 / 2 -> C10H16N3O6S1 + [13]C0.5C-0.5 -> [13]C0.5C9.5H16N3O6S1
465	339.074	13.98	6.03	Artifact	C10H17N3O8S1	-0.49	Peak 3096 C8H14N2O8S1 + C2H3N1 -> C10H17N3O8S1
466	288.23	4.22	6.03	Metabolite	C16H32O4	0.21	(S)-10,16-Dihydroxyhexadecanoic acid C16H32O4
467	132.098	9.83	6.07	Artifact	[13]C1C5H13N1O2	0.63	isoleucine C6H13N1O2 + [13]C1C-1 -> [13]C1C5H13N1O2
468	132.098	9.31	5.96	Artifact	[13]C1C5H13N1O2	0.63	leucine C6H13N1O2 + [13]C1C-1 -> [13]C1C5H13N1O2
469	235.898	13.85	6.01	Artifact	[41]K1C2H4K1O6S1	0.39	KHSO4 H1K1O4S1 + C2H3K1O2 + [41]K1K-1 -> [41]K1C2H4K1O6S1
470	94.0418	4.21	5.96	Metabolite	C6H6O1	0.48	Phenol C6H6O1
471	300.034	2.95	5.87	Putative metabolite	C9H16O7S2	0.15	Cibulins C3H8O1S1 + C6H8O6 -> C9H16O7S1 + S1 -> C9H16O7S2
472	300.034	2.65	5.87	Putative metabolite	C9H16O7S2	0.15	Cibulins C3H8O1S1 + C6H8O6 -> C9H16O7S1 + S1 -> C9H16O7S2
473	282.757	2.43	5.87	Artifact	[13]C0.5C17.5H34O2	0.91	Oleic acid C18H34O2 + [13]C0.5C-0.5 -> [13]C0.5C17.5H34O2
474	146.125	13.38	6.04	Artifact	Ring_artifact_C5H10N2O3	0.59	glutamine C5H10N2O3 + Ring_artifact -> Ring_artifact_C5H10N2O3
475	505.737	13.85	5.92	Artifact	H5K3O16S4	-0.07	KHSO4 H1K1O4S1 + H2O4S1 + Peak 136 -> H5K3O16S4
476	343.28	2.43	5.95	Artifact	[13]C1C19H38O4	0.19	Oleic acid C18H34O2 + [13]C1C-1 -> [13]C1C17H34O2 + C2H4O2 -> [13]C1C19H38O4
477	244.167	2.63	6.02	Metabolite	C13H24O4	0.65	1,11-Undecanedicarboxylic acid C13H24O4
478	244.167	8.59	5.31	Metabolite	C13H24O4	0.65	1,11-Undecanedicarboxylic acid C13H24O4
479	244.167	4.08	5.14	Metabolite	C13H24O4	0.65	1,11-Undecanedicarboxylic acid C13H24O4
480	511.468	2.48	5.91	Artifact	[13]C1C31H62O4	0.71	Propylene glycol mono- and diesters of fats and fatty acids C32H62O4 + [13]C1C-1 -> [13]C1C31H62O4
481	122.079	2.92	5.07	Unknown	Unknown	0.67	Unknown
482	179.98	14.39	5.99	Artifact	C4H6K1Na1O4	1.03	CH3COOK C2H3K1O2 + C2H3Na1O2
483	213.964	13.92	6	Artifact	C4H8K2O5	0.41	CH3COOK C2H3K1O2 + C2H4O2 + H1K1O1 -> C4H8K2O5
484	259.046	13.68	6.01	Metabolite	C6H14N1O8P1	0.78	D-glucosamine-1/6-phosphate C6H14N1O8P1
485	259.046	14.14	5.4	Metabolite	C6H14N1O8P1	0.78	D-glucosamine-1/6-phosphate C6H14N1O8P1
486	330.092	7.63	6.03	Artifact	C10H14N6O7	-0.31	Adenosine C10H13N5O4 + H1N1O3 -> C10H14N6O7
487	330.094	13.38	4.69	Artifact	C10H19K1N4O6	0.2	glutamine C5H10N2O3 * 2 -> C10H20N4O6 + H-1K1 -> C10H19K1N4O6
488	89.1354	13.01	5.9	Artifact	Ring_artifact_C3H7N1O2	1.09	alanine C3H7N1O2 + Ring_artifact -> Ring_artifact_C3H7N1O2
489	216.04	6.82	4.52	Unknown	Unknown	0.45	Unknown
490	130.027	6.51	5.79	Metabolite	C5H6O4	0.07	Glutaconic acid C5H6O4
491	581.369	3.07	5.53	Putative metabolite	C28H56N1O9P1	-0.05	PS(18:0/20:0) C44H86N1O10P1 - C16H30O1 -> C28H56N1O9P1
492	581.369	7.1	5.98	Putative metabolite	C28H56N1O9P1	-0.05	PS(18:0/20:0) C44H86N1O10P1 - C16H30O1 -> C28H56N1O9P1
493	581.369	3.61	3.9	Putative metabolite	C28H56N1O9P1	0.12	PS(18:0/20:0) C44H86N1O10P1 - C16H30O1 -> C28H56N1O9P1
494	191.062	7.1	5.99	Metabolite	C7H13N1O3S1	0.07	N-Acetyl-L-methionine C7H13N1O3S1
495	130.046	11.14	5.66	Artifact	[13]C1C4H7N1O3	0.37	Pyroglutamic acid C5H7N1O3 + [13]C1C-1 -> [13]C1C4H7N1O3
496	147.089	9.91	6.05	Metabolite	C6H13N1O3	0.29	(2R,3R,4R)-2-Amino-4-hydroxy-3-methylpentanoic acid C6H13N1O3
497	157.935	13.89	6.03	Artifact	Ring_artifact_C4H7K1O4	0.56	CH3COOK C2H3K1O2 + C2H4O2 + Ring_artifact -> Ring_artifact_C4H7K1O4
498	213.02	13.65	6.03	Artifact	C5Cr1H11N3O3	0.23	citrulline C6H13N3O3 + Cr1O3 -> C6Cr1H13N3O6 - C1O2 -> C5Cr1H13N3O4 - H2O1 -> C5Cr1H11N3O3
499	605.077	14.11	6	Metabolite	C16H25N5O16P2	0.09	Guanosine diphosphate mannose C16H25N5O16P2
500	216.968	13.5	5.98	Artifact	C4Cr1H7N1O6	1.13	glutamate C5H9N1O4 + Cr1O3 -> C5Cr1H9N1O7 - C1H2O1 -> C4Cr1H7N1O6
501	188.116	12.95	6.03	Metabolite	C8H16N2O3	0.49	N6-Acetyl-L-lysine C8H16N2O3
502	188.116	8.64	5.17	Metabolite	C8H16N2O3	0.49	N6-Acetyl-L-lysine C8H16N2O3
503	188.116	9.51	5.48	Metabolite	C8H16N2O3	0.49	N6-Acetyl-L-lysine C8H16N2O3
504	570.28	7.09	5.95	Putative metabolite	C25H47O12P1	0.02	1-Oleoylglycerophosphoinositol C27H51O12P1 - C2H4 -> C25H47O12P1
505	357.111	5.01	5.95	Artifact	C13H19N5O5S1	-0.31	5'-Methylthioadenosine C11H15N5O3S1 + C2H4O2 -> C13H19N5O5S1
506	357.111	14.97	5.59	Artifact	C13H19N5O5S1	-0.31	5'-Methylthioadenosine C11H15N5O3S1 + C2H4O2 -> C13H19N5O5S1
507	250.085	2.35	5.97	Artifact	[34]S0.5C12H17O3.5S0.5	0.38	No edge connections.
508	250.085	3.34	4.47	Unknown	Unknown	0.41	Unknown
509	363.058	14.08	6	Metabolite	C10H14N5O8P1	-0.28	GMP C10H14N5O8P1
510	555.13	14.19	5.98	Unknown	Unknown	0.27	Unknown
511	111.983	8.18	5.05	Putative metabolite	C1H4O4S1	0.26	Heptadecanoic acid C17H34O2 + O3S1 -> C17H34O5S1 - C16H30O1 -> C1H4O4S1
512	297.889	13.93	5.91	Artifact	C4H5K3O8	0.21	KHCO3 C1H1K1O3 + C2H3K1O2 + C1H1K1O3 -> C4H5K3O8
513	188.973	12.99	6	Artifact	C3Cr1H7N1O5	0.69	alanine C3H7N1O2 + Cr1O3 -> C3Cr1H7N1O5
514	269.243	2.45	5.95	Artifact	[13]C1C16H32O2	0.69	Cyclohexaneundecanoic acid C17H32O2 + [13]C1C-1 -> [13]C1C16H32O2
515	256.204	2.62	5.96	Artifact	Ring_artifact_C16H32O2	0.41	Palmitic acid C16H32O2 + Ring_artifact -> Ring_artifact_C16H32O2
516	523.291	7.09	5.95	Metabolite	C24H46N1O9P1	0.61	1-Oleoylglycerophosphoserine C24H46N1O9P1
517	920.565	2.45	5.77	Putative metabolite	C57H76Mg1N4O5	1.32	Chlorophyll a C55H72Mg1N4O5 + C2H4 -> C57H76Mg1N4O5
518	146.121	4.21	5.98	Artifact	[13]C2C6H16O2	1.64	Caprylic acid C8H16O2 + [13]C1C-1 -> [13]C1C7H16O2 + [13]C1C-1 -> [13]C2C6H16O2
519	146.121	2.82	5.85	Artifact	[13]C2C6H16O2	1.64	Caprylic acid C8H16O2 + [13]C1C-1 -> [13]C1C7H16O2 + [13]C1C-1 -> [13]C2C6H16O2
520	257.199	2.62	5.91	Artifact	Ring_artifact_[13]C1C15H32O2	0.4	Palmitic acid C16H32O2 + [13]C1C-1 -> [13]C1C15H32O2 + Ring_artifact -> Ring_artifact_[13]C1C15H32O2
521	257.199	3.96	5.15	Metabolite	C14H27N1O3	-0.02	N-Lauroylglycine C14H27N1O3
522	244.204	4.23	5.91	Metabolite	C14H28O3	0.59	2-Hydroxymyristic acid C14H28O3
523	101.941	13.01	5.96	Unknown	Unknown	0.78	Unknown
524	101.941	11.31	4.44	Unknown	Unknown	0.78	Unknown
525	101.941	8.82	3.78	Unknown	Unknown	0.78	Unknown
526	324.036	13.93	5.96	Metabolite	C9H13N2O9P1	-0.1	UMP C9H13N2O9P1
527	409.919	13.9	5.86	Artifact	C8H14K4O9	-0.22	CH3COOK C2H3K1O2 + C2H4O2 + Peak 173 -> C9H14K4O11 - C1O2 -> C8H14K4O9
528	202.12	2.31	5.47	Metabolite	C10H18O4	0.05	Sebacic acid C10H18O4
529	194.115	4.35	5.8	Metabolite	C8H18O5	0.64	Tetraethylene glycol C8H18O5
530	314.172	2.08	5.93	Artifact	[34]S1C17H28O3	-0.6	N-Undecylbenzenesulfonic acid C17H28O3S1 + [34]S1S-1 -> [34]S1C17H28O3
531	257.954	13.91	6.03	Artifact	C5H8K2O7	0.06	CH3COOK C2H3K1O2 + C2H4O2 + C1H1K1O3 -> C5H8K2O7
532	235.886	13.85	6.34	Artifact	[34]S1H3K1O8S1	0.58	KHSO4 H1K1O4S1 + H2O4S1 + [34]S1S-1 -> [34]S1H3K1O8S1
533	522.335	16.77	5.98	Artifact	C18H42N12O6	0.82	L-Arginine C6H14N4O2 * 3 -> C18H42N12O6
534	281.243	2.46	5.9	Artifact	[13]C1C17H32O2	0.66	Linoleic acid C18H32O2 + [13]C1C-1 -> [13]C1C17H32O2
535	328.298	2.54	5.9	Metabolite	C20H40O3	-0.17	Polyoxyethylene 40 monostearate C20H40O3
536	302.224	2.47	5.9	Metabolite	C20H30O2	0.6	Eicosapentaenoic acid C20H30O2
537	297.908	13.92	5.89	Artifact	[41]K1C5H7K2O7	0.39	KHCO3 C1H1K1O3 + C2H3K1O2 + C2H3K1O2 -> C5H7K3O7 + [41]K1K-1 -> [41]K1C5H7K2O7
538	540.512	2.45	5.85	Artifact	C34H68O4	-0.07	Heptadecanoic acid C17H34O2 * 2 -> C34H68O4
539	185.032	12.92	5.95	Metabolite	C7H7N1O5	0.66	2-Amino-3-carboxymuconic acid semialdehyde C7H7N1O5
540	256.095	2.33	5.92	Artifact	Ring_artifact_C16H32O2	0.41	Palmitic acid C16H32O2 + Ring_artifact -> Ring_artifact_C16H32O2
541	104.067	13.49	5.97	Artifact	[13]C1C3H9N1O2	-0.16	glutamate C5H9N1O4 - C1O2 -> C4H9N1O2 + [13]C1C-1 -> [13]C1C3H9N1O2
542	104.067	12.19	5.26	Artifact	[13]C1C3H9N1O2	-0.16	b-Aminoisobutyric acid C4H9N1O2 + [13]C1C-1 -> [13]C1C3H9N1O2
543	388.105	2.56	5.72	Metabolite	C17Cl1H17N6O3	0.94	Eszopiclone C17Cl1H17N6O3
544	239.075	11.3	5.96	Artifact	C6H13N3O7	0.63	L-2-Amino-4-methylenepentanedioic acid C6H9N1O4 + H3N1 -> C6H12N2O4 + H1N1O3 -> C6H13N3O7
545	235.889	13.85	6.03	Artifact	[41]K1H3O8S2	-0.17	KHSO4 H1K1O4S1 + H2O4S1 + [41]K1K-1 -> [41]K1H3O8S2
546	309.08	13.5	5.82	Artifact	[34]S1C10H17N3O6	-0.32	glutathione C10H17N3O6S1 + [34]S1S-1 -> [34]S1C10H17N3O6
547	256.369	2.47	6.26	Artifact	Ring_artifact_C16H32O2	0.41	Palmitic acid C16H32O2 + Ring_artifact -> Ring_artifact_C16H32O2
548	297.107	7.88	5.98	Metabolite	C11H15N5O5	0.4	7-Methylguanosine C11H15N5O5
549	148.05	13.49	5.98	Artifact	[15]N1C5H9O4	1.98	glutamate C5H9N1O4 + [15]N1N-1 -> [15]N1C5H9O4
550	168.051	13.39	5.96	Artifact	C5H9N2Na1O3	1.11	glutamine C5H10N2O3 + H-1Na1 -> C5H9N2Na1O3
551	168.051	14.39	4.14	Unknown	Unknown	0.53	Unknown
552	284.422	2.44	6	Artifact	Ring_artifact_C18H36O2	0.38	Stearic acid C18H36O2 + Ring_artifact -> Ring_artifact_C18H36O2
553	522.144	2.51	5.6	Unknown	Unknown	0.28	Unknown
554	525.119	2.53	5.7	Unknown	Unknown	0.28	Unknown
555	100.933	13.02	5.95	Unknown	Unknown	0.98	Unknown
556	254.995	13.44	5.83	Artifact	C6Cr1H9N3O5	0.11	asparagine C4H8N2O3 + Cr1O3 -> C4Cr1H8N2O6 + C2H3N1 -> C6Cr1H11N3O6 - H2O1 -> C6Cr1H9N3O5
557	254.995	14.11	5.23	Putative metabolite	C8H5N3O5S1	1.14	Furazolidone C8H7N3O5 - H2 -> C8H5N3O5 + S1 -> C8H5N3O5S1
558	254.995	14.31	5.07	Putative metabolite	C8H5N3O5S1	1.14	Furazolidone C8H7N3O5 - H2 -> C8H5N3O5 + S1 -> C8H5N3O5S1
559	204.036	13.01	5.95	Artifact	C4H9N2Na1O6	-0.34	threonine C4H9N1O3 + N1Na1O3 -> C4H9N2Na1O6
560	292.187	2.57	5.85	Artifact	[13]C1C16H25N1O3	0	Cyclopentolate C17H25N1O3 + [13]C1C-1 -> [13]C1C16H25N1O3
561	292.187	3.79	5.02	Artifact	[13]C1C16H25N1O3	0	Cyclopentolate C17H25N1O3 + [13]C1C-1 -> [13]C1C16H25N1O3
562	147.973	3.21	5.68	Artifact	H1N2Na1O6	0.21	NaNO3 N1Na1O3 + H1N1O3
563	387.176	2.78	5.87	Artifact	[13]C1C21H26O6	-0.53	Porson C22H26O6 + [13]C1C-1 -> [13]C1C21H26O6
564	301.212	2.5	5.77	Artifact	[13]C1C19H28O2	0.28	Retinoic Acid C20H28O2 + [13]C1C-1 -> [13]C1C19H28O2
565	289.867	13.88	5.92	Artifact	C2H5K3O7S1	-0.28	KHSO4 H1K1O4S1 + C2H3K1O2 + H1K1O1 -> C2H5K3O7S1
566	608.085	13.75	5.87	Artifact	[13]C1C16H27N3O17P2	0.04	Uridine diphosphate-N-acetylglucosamine C17H27N3O17P2 + [13]C1C-1 -> [13]C1C16H27N3O17P2
567	302.165	7.1	5.9	Putative metabolite	C15H27O4P1	-0.01	7Z,10Z-Hexadecadienoic acid C16H28O2 + H1O3P1 -> C16H29O5P1 - C1H2O1 -> C15H27O4P1
568	267.192	2.58	5.89	Artifact	[13]C1C15H26O3	0.19	4-(1,1,3,3-Tetramethylbutyl)-phenol C14H22O1 + [13]C1C-1 -> [13]C1C13H22O1 + C2H4O2 -> [13]C1C15H26O3
569	153.054	13.56	5.66	Putative metabolite	C6H7N3O2	0.17	(S)-Spinacine C7H9N3O2 - C1H2 -> C6H7N3O2
570	195.954	14.13	5.94	Artifact	C2H6K1O6P1	1.05	Methylphosphate C1H5O4P1 + C1H1K1O2
571	89.0244	13.01	5.1	Artifact	Ring_artifact_C3H7N1O2	1.09	alanine C3H7N1O2 + Ring_artifact -> Ring_artifact_C3H7N1O2
572	893.541	2.48	5.85	Unknown	Unknown	0.23	Unknown
573	177.042	5.86	5.59	Metabolite	C9H7N1O3	0.53	4-Acetyl-2(3H)-benzoxazolone C9H7N1O3
574	189.083	11.29	5.9	Artifact	[13]C1C6H12N2O4	0.86	Peak 3989 C14H24N4O8 / 2 -> C7H12N2O4 + [13]C1C-1 -> [13]C1C6H12N2O4
575	355.95	13.88	5.85	Artifact	[41]K1C8H13K2O8	-0.33	CH3COOK C2H3K1O2 + C2H4O2 + [41]K1K-1 -> [41]K1C4H7O4 + C2H3K1O2 -> [41]K1C6H10K1O6 + C2H3K1O2 -> [41]K1C8H13K2O8
576	226.032	2.57	5.78	Putative metabolite	C6H10O9	-0.08	{[2,3,4-trihydroxy-5-(hydroxymethyl)oxolan-2-yl]methoxy}sulfonic acid C6H12O9S1 - H2S1 -> C6H10O9
577	101.941	13.38	5.96	Unknown	Unknown	0.78	Unknown
578	160.037	13.38	5.92	Metabolite	C6H8O5	1.71	Oxoadipic acid C6H8O5
579	538.06	13.85	5.87	Artifact	C14H27K1O17S1	0.56	Lactose C12H22O11 + C2H4O2 -> C14H26O13 + H1K1O4S1 -> C14H27K1O17S1
580	175.048	13.38	5.91	Artifact	C6H9N1O5	0.98	Peak 3132 C7H11N1O6 - C1H2O1 -> C6H9N1O5
581	372.073	2.64	5.6	Putative metabolite	C11F1H18N2O9P1	0.52	5-Fluorouridine monophosphate C9F1H12N2O9P1 + C2H4 -> C11F1H16N2O9P1 + H2 -> C11F1H18N2O9P1
582	174.04	16.77	5.9	Artifact	Ring_artifact_C6H14N4O2	0.52	L-Arginine C6H14N4O2 + Ring_artifact -> Ring_artifact_C6H14N4O2
583	224.141	2.69	5.66	Artifact	C13H20O3	0.2	Peak 326 C14H22O4 - C1H2O1 -> C13H20O3
584	141.042	12.92	5.92	Metabolite	C6H7N1O3	0.66	2-Aminomuconic acid semialdehyde C6H7N1O3
585	430.163	2.78	5.85	Metabolite	C23H26O8	0.16	Cubebinone C23H26O8
586	454.086	13.9	5.67	Unknown	Unknown	0.3	Unknown
587	583.348	3.07	5.89	Artifact	C27H54N1O10P1	0.06	LysoPE(0:0/16:1(9Z)) C21H42N1O7P1 + Peak 113 -> C27H54N1O10P1
588	583.348	7.1	5.58	Putative metabolite	C27H54N1O10P1	0.06	Phosphorylcholine C5H14N1O4P1 + C6H10O5 -> C11H24N1O9P1 + C16H30O1 -> C27H54N1O10P1
589	583.348	3.57	4.63	Putative metabolite	C27H54N1O10P1	0.06	Phosphorylcholine C5H14N1O4P1 + C6H10O5 -> C11H24N1O9P1 + C16H30O1 -> C27H54N1O10P1
590	199.082	11.2	5.92	Artifact	C7H14N1Na1O4	0.26	DL-Valine C5H11N1O2 + C2H3Na1O2 -> C7H14N1Na1O4
591	199.082	9.3	4.61	Artifact	C7H14N1Na1O4	0.26	leucine C6H13N1O2 + C1H1Na1O2 -> C7H14N1Na1O4
592	199.082	9.84	4.29	Artifact	C7H14N1Na1O4	0.26	isoleucine C6H13N1O2 + C1H1Na1O2 -> C7H14N1Na1O4
593	88.9596	13.01	5.9	Artifact	Ring_artifact_C3H7N1O2	1.09	alanine C3H7N1O2 + Ring_artifact -> Ring_artifact_C3H7N1O2
594	320.051	14.17	5.9	Artifact	C8H17O11P1	0.15	glucose-1-phosphate C6H13O9P1 + C2H4O2 -> C8H17O11P1
595	320.218	2.49	5.78	Artifact	[13]C1C18H29N1O3	0.62	Homocapsaicin C19H29N1O3 + [13]C1C-1 -> [13]C1C18H29N1O3
596	320.218	3.71	4.67	Artifact	[13]C1C18H29N1O3	0.31	Homocapsaicin C19H29N1O3 + [13]C1C-1 -> [13]C1C18H29N1O3
597	404.002	14.11	5.92	Metabolite	C9H14N2O12P2	-0.01	UDP C9H14N2O12P2
598	215.029	9.03	5.93	Artifact	C5H5N5O5	0.32	Xanthine C5H4N4O2 + H1N1O3 -> C5H5N5O5
599	180.042	2.84	5.14	Metabolite	C9H8O4	-0.23	hydroxyphenylpyruvate C9H8O4
600	349.227	16.77	5.89	Artifact	[13]C1C11H28N8O4	0.02	L-Arginine C6H14N4O2 * 2 -> C12H28N8O4 + [13]C1C-1 -> [13]C1C11H28N8O4
601	497.275	7.09	5.86	Artifact	C22H44N1O9P1	0.14	LysoPE(0:0/16:1(9Z)) C21H42N1O7P1 + C1H2O2 -> C22H44N1O9P1
602	156.017	8.57	5.92	Metabolite	C5H4N2O4	1.32	Orotic acid C5H4N2O4
603	283.107	2.43	5.83	Artifact	Ring_artifact_[13]C1C17H34O2	0.38	Oleic acid C18H34O2 + [13]C1C-1 -> [13]C1C17H34O2 + Ring_artifact -> Ring_artifact_[13]C1C17H34O2
604	124.043	4.21	5.57	Artifact	[13]C2C5H6O2	0.72	Benzoic acid C7H6O2 + [13]C1C-1 -> [13]C1C6H6O2 + [13]C1C-1 -> [13]C2C5H6O2
605	355.932	13.9	5.81	Artifact	C7H11K3O9	-0.2	CH3COOK C2H3K1O2 + C2H4O2 + Peak 1704 -> C7H11K3O9
606	372.173	13.64	5.86	Artifact	C12H25N6Na1O6	0.34	citrulline C6H13N3O3 + Peak 884 -> C12H25N6Na1O6
607	212.089	9.9	5.9	Artifact	C7H16O7	0.48	D-Arabitol C5H12O5 + C2H4O2 -> C7H16O7
608	212.091	13.16	5.33	Metabolite	C8H12N4O3	0.19	Glycyl-Histidine C8H12N4O3
609	212.091	12.44	4.91	Metabolite	C8H12N4O3	0.19	Glycyl-Histidine C8H12N4O3
610	387.172	2.08	4.43	Artifact	C18H29N1O6S1	-0.62	Peak 1364 C18H28O3S1 + H1N1O3 -> C18H29N1O6S1
611	283.092	9.71	5.89	Metabolite	C10H13N5O5	0.24	guanosine C10H13N5O5
612	260.199	4.2	5.76	Artifact	C14H28O4	0.61	Caprylic acid C8H16O2 + Peak 16 -> C14H28O4
613	238.193	2.52	5.82	Artifact	C15H26O2	-0.08	4-(1,1,3,3-Tetramethylbutyl)-phenol C14H22O1 + C1H4O1 -> C15H26O2
614	143.058	7.17	5.9	Metabolite	C6H9N1O3	1	Vinylacetylglycine C6H9N1O3
615	235.165	2.53	5.66	Artifact	[13]C1C14H22O2	0.57	Valerenic acid C15H22O2 + [13]C1C-1 -> [13]C1C14H22O2
616	295.922	13.85	5.81	Unknown	Unknown	0.37	Unknown
617	179.095	2.89	5.68	Metabolite	C10H13N1O2	0.72	2(N)-Methyl-norsalsolinol C10H13N1O2
618	448.201	2.77	5.79	Artifact	[13]C2C22H30O8	0.4	Estrone glucuronide C24H30O8 + [13]C1C-1 -> [13]C1C23H30O8 + [13]C1C-1 -> [13]C2C22H30O8
619	498.175	2.35	5.82	Artifact	C24H34O7S2	0.19	Peak 73 C12H18O1S2 + Peak 540 -> C24H34O7S2
620	498.174	3.33	4.68	Metabolite	C23H30O12	-1.35	Eucaglobulin C23H30O12
621	371.812	13.84	5.77	Artifact	C3H4K4O9S1	0.62	KHSO4 H1K1O4S1 + C2H3K1O2 + C1H1K1O3 -> C3H5K3O9S1 + H-1K1 -> C3H4K4O9S1
622	159.089	7.09	5.82	Metabolite	C7H13N1O3	0.9	N-Iso valerylglycine C7H13N1O3
623	451.929	13.89	5.77	Artifact	C8H16K3O12P1	-0.31	CH3COOK C2H3K1O2 + C2H4O2 + C2H3K1O2 -> C6H10K2O6 + C2H3K1O2 -> C8H13K3O8 + H3O4P1 -> C8H16K3O12P1
624	317.265	2.48	5.79	Artifact	[13]C1C17H36O4	0.05	Palmitic acid C16H32O2 + [13]C1C-1 -> [13]C1C15H32O2 + C2H4O2 -> [13]C1C17H36O4
625	317.265	4.21	5.42	Artifact	[13]C1C17H36O4	0.05	MG(0:0/15:0/0:0) C18H36O4 + [13]C1C-1 -> [13]C1C17H36O4
626	208.174	2.57	5.83	Artifact	[13]C2C12H22O1	0.84	4-(1,1,3,3-Tetramethylbutyl)-phenol C14H22O1 + [13]C1C-1 -> [13]C1C13H22O1 + [13]C1C-1 -> [13]C2C12H22O1
627	260.098	13.02	5.88	Artifact	C8H17N2Na1O6	0.89	alanine C3H7N1O2 + Peak 199 -> C8H17N2Na1O6
628	117.064	11.24	4.38	Artifact	Ring_artifact_C5H11N1O2	0.7	DL-Valine C5H11N1O2 + Ring_artifact -> Ring_artifact_C5H11N1O2
629	447.189	2.81	5.8	Metabolite	C23H29N1O8	-0.19	Hydromorphone-3-glucoside C23H29N1O8
630	86.0731	7.08	5.77	Metabolite	C5H10O1	0.29	Iso-Valeraldehyde C5H10O1
631	86.0731	4.2	4.87	Artifact	C5H10O1	0.41	10-Hydroxymyristic acid methyl ester C15H30O3 / 3 -> C5H10O1
632	137.056	4.21	5.83	Artifact	[13]C1C7H8O2	0.62	Phenylacetic acid C8H8O2 + [13]C1C-1 -> [13]C1C7H8O2
633	137.056	2.88	5.14	Artifact	[13]C1C7H8O2	0.62	L-(?)-3-Phenyllactic acid C9H10O3 - C1H2O1 -> C8H8O2 + [13]C1C-1 -> [13]C1C7H8O2
634	177.1	13.64	5.85	Artifact	[18]O1C6H13N3O2	1.34	citrulline C6H13N3O3 + [18]O1O-1 -> [18]O1C6H13N3O2
635	177.1	11.23	4.63	Artifact	C7H15N1O4	0.61	DL-Valine C5H11N1O2 + C2H4O2 -> C7H15N1O4
636	177.1	9.3	4.43	Artifact	C7H15N1O4	1.17	leucine C6H13N1O2 + C1H2O2 -> C7H15N1O4
637	177.1	9.84	4.16	Artifact	C7H15N1O4	0.61	isoleucine C6H13N1O2 + C1H2O2 -> C7H15N1O4
638	184.02	13.42	5.82	Artifact	[13]C1C6H5N1O5	1.23	quinolinate C7H5N1O4 + O1 + [13]C1C-1 -> [13]C1C6H5N1O5
639	73.0164	13.01	5.78	Artifact	C2H3N1O2	0.11	HCN C1H1N1 + C1H2O2
640	452.273	7.1	5.75	Artifact	[13]C1C20H42N1O7P1	-0.12	LysoPE(0:0/16:1(9Z)) C21H42N1O7P1 + [13]C1C-1 -> [13]C1C20H42N1O7P1
641	452.273	3.07	5.49	Artifact	[13]C1C20H42N1O7P1	-0.12	LysoPE(0:0/16:1(9Z)) C21H42N1O7P1 + [13]C1C-1 -> [13]C1C20H42N1O7P1
642	505.756	13.86	5.81	Artifact	C4H7K5O12S2	0.45	KHSO4 H1K1O4S1 + H2O4S1 + H-2K2 -> H1K3O8S2 + C2H3K1O2 -> C2H4K4O10S2 + C2H3K1O2 -> C4H7K5O12S2
643	313.298	2.53	5.77	Putative metabolite	C19H39N1O2	-0.38	Nonadecanoic acid C19H38O2 + H1N1 -> C19H39N1O2
644	133.931	13.01	5.87	Artifact	Cr1H2O5	0.98	Hydrogen peroxide H2O2 + Cr1O3
645	133.931	13.39	5.88	Artifact	Cr1H2O5	0.23	Hydrogen peroxide H2O2 + Cr1O3
646	230.188	4.23	5.58	Artifact	C13H26O3	0.85	3-Hydroxytetradecanedioic acid C14H26O5 - C1O2 -> C13H26O3
647	230.188	2.44	5.71	Metabolite	C13H26O3	0.41	3-[[5-Methyl-2-(1-methylethyl)cyclohexyl]oxy]-1,2-propanediol C13H26O3
648	301.091	2.65	5.34	Artifact	[13]C1C9H20O8S1	-0.85	2-Hydroxyoctanoic acid C8H16O3 + O3S1 + [13]C1C-1 -> [13]C1C7H16O6S1 + C2H4O2 -> [13]C1C9H20O8S1
649	218.056	11.81	5.85	Artifact	C6Cl1H15O6	0.53	Galactitol C6H14O6 + Cl1H1 -> C6Cl1H15O6
650	218.055	11.37	5.77	Artifact	C6Cl1H15O6	0.99	Galactitol C6H14O6 + Cl1H1 -> C6Cl1H15O6
651	328.187	2.08	5.84	Artifact	[34]S1C18H30O3	-0.12	2-Dodecylbenzenesulfonic acid C18H30O3S1 + [34]S1S-1 -> [34]S1C18H30O3
652	599.138	2.52	5.62	Putative metabolite	C21H26N7O12P1	0.01	Nicotinamide riboside C11H14N2O5 + O1 -> C11H14N2O6 + C10H12N5O6P1 -> C21H26N7O12P1
653	190.084	4.1	5.86	Metabolite	C8H14O5	0.65	3-Hydroxysuberic acid C8H14O5
654	116.067	11.97	5.87	Unknown	Unknown	0.7	Unknown
655	296.271	2.42	5.74	Metabolite	C19H36O2	1.12	10Z-Nonadecenoic acid C19H36O2
656	281.754	2.45	5.73	Unknown	Unknown	0.38	Unknown
657	761.087	13.91	5.73	Artifact	C23H30K1N7O16P2	-1.53	NAD C21H27N7O14P2 + C2H3K1O2 -> C23H30K1N7O16P2
658	121.994	4.21	6	Artifact	Ring_artifact_C7H6O2	0.67	Benzoic acid C7H6O2 + Ring_artifact -> Ring_artifact_C7H6O2
659	121.994	2.93	5.07	Unknown	Unknown	0.67	Unknown
660	172.014	13.59	5.84	Metabolite	C3H9O6P1	0.43	sn-glycerol-3-phosphate C3H9O6P1
661	242.046	2.88	5.56	Putative metabolite	C7H14O7S1	-0.73	Arabinonic acid C5H10O6 + C2H2O1 -> C7H12O7 + H2S1 -> C7H14O7S1
662	161.048	7.15	5.8	Metabolite	C9H7N1O2	0.49	2-Indolecarboxylic acid C9H7N1O2
663	97.0528	12.93	5.83	Metabolite	C5H7N1O1	0.14	1-Cyano-2-hydroxy-3-butene C5H7N1O1
664	343.12	14.83	5.63	Artifact	[13]C1C11H22O11	0.19	Melibiose C12H22O11 + [13]C1C-1 -> [13]C1C11H22O11
665	343.12	13.88	5.68	Artifact	[13]C1C11H22O11	-0.1	Lactose C12H22O11 + [13]C1C-1 -> [13]C1C11H22O11
666	115.027	2.75	5.77	Putative metabolite	C4H5N1O3	0.37	Pyroglutamic acid C5H7N1O3 - C1H2 -> C4H5N1O3
667	598.312	7.09	5.76	Metabolite	C27H51O12P1	0.02	1-Oleoylglycerophosphoinositol C27H51O12P1
668	329.888	13.86	5.83	Artifact	C2H8K2O10S1Si1	-0.13	KHSO4 H1K1O4S1 + C2H3K1O2 + H4O4Si1 -> C2H8K2O10S1Si1
669	160.999	13.87	5.79	Artifact	[13]C1[41]K1C3H7O4	1.33	CH3COOK C2H3K1O2 + C2H4O2 + [41]K1K-1 -> [41]K1C4H7O4 + [13]C1C-1 -> [13]C1[41]K1C3H7O4
670	134.999	2.27	5.8	Putative metabolite	C3H5N1O3S1	0.1	Pyruvatoxime C3H5N1O3 + S1 -> C3H5N1O3S1
671	134.999	2.63	5.8	Putative metabolite	C3H5N1O3S1	0.1	Pyruvatoxime C3H5N1O3 + S1 -> C3H5N1O3S1
672	409.777	13.85	5.8	Artifact	[41]K1C2H4K3O10S2	0.82	KHSO4 H1K1O4S1 + C2H4O2 + H1K1O4S1 -> C2H6K2O10S2 + H-2K2 -> C2H4K4O10S2 + [41]K1K-1 -> [41]K1C2H4K3O10S2
673	600.327	7.09	5.74	Metabolite	C27H53O12P1	0.11	1-Stearoylglycerophosphoinositol C27H53O12P1
674	441.087	13.85	5.52	Artifact	[13]C1C11H24O15S1	-0.12	Lactose C12H22O11 + H2O4S1 -> C12H24O15S1 + [13]C1C-1 -> [13]C1C11H24O15S1
675	254.098	2.49	6.18	Artifact	Ring_artifact_C16H30O2	0.41	Hypogeic acid C16H30O2 + Ring_artifact -> Ring_artifact_C16H30O2
676	102.079	13.38	5.82	Artifact	C4H10N2O1	0.13	glutamine C5H10N2O3 - C1O2 -> C4H10N2O1
677	203.127	14.71	5.81	Metabolite	C8H17N3O3	0.45	Glycyl-Lysine C8H17N3O3
678	203.127	14.24	5.55	Metabolite	C8H17N3O3	0.45	Glycyl-Lysine C8H17N3O3
679	149.051	10.08	5.84	Metabolite	C5H11N1O2S1	0.33	methionine C5H11N1O2S1
680	543.693	13.85	5.72	Artifact	H4K4O16S4	0.63	KHSO4 H1K1O4S1 + H1K1O4S1 + H1K1O4S1 -> H3K3O12S3 + H1K1O4S1 -> H4K4O16S4
681	247.978	13.51	5.82	Artifact	[53]Cr1C5H9N1O7	0.61	glutamate C5H9N1O4 + Cr1O3 -> C5Cr1H9N1O7 + [53]Cr1Cr-1 -> [53]Cr1C5H9N1O7
682	134.041	13.58	5.82	Artifact	[13]C1C3H7N1O4	1.21	aspartate C4H7N1O4 + [13]C1C-1 -> [13]C1C3H7N1O4
683	134.041	11.29	5.41	Artifact	[13]C1C3H7N1O4	0.47	L-Aspartic acid C4H7N1O4 + [13]C1C-1 -> [13]C1C3H7N1O4
684	202.107	13.44	5.76	Artifact	C7H14N4O3	0.45	citrulline C6H13N3O3 + C1H1N1 -> C7H14N4O3
685	303.108	13.58	5.82	Artifact	C9H22N1O8P1	0.01	Peak 115 C7H18N1O6P1 + C2H4O2 -> C9H22N1O8P1
686	194.033	14.18	4.94	Unknown	Unknown	0.48	Unknown
687	208.058	4.95	5.83	Artifact	C7H12O7	0.97	L-2-Hydroxyglutaric acid C5H8O5 + C2H4O2 -> C7H12O7
688	208.058	12.23	4.98	Putative metabolite	C7H12O7	0.97	Arabinonic acid C5H10O6 + C2H2O1 -> C7H12O7
689	420.291	2.43	5.68	Artifact	C22H44O5S1	0.11	10,20-Dihydroxyeicosanoic acid C20H40O4 + Peak 1651 -> C22H44O5S1
690	513.484	2.47	5.6	Artifact	[13]C1C31H64O4	0.22	Palmitic acid C16H32O2 * 2 -> C32H64O4 + [13]C1C-1 -> [13]C1C31H64O4
691	183.082	11.81	5.84	Artifact	[13]C1C5H14O6	1.05	Galactitol C6H14O6 + [13]C1C-1 -> [13]C1C5H14O6
692	183.082	11.36	5.71	Artifact	[13]C1C5H14O6	1.05	Galactitol C6H14O6 + [13]C1C-1 -> [13]C1C5H14O6
693	227.069	2.84	5.67	Unknown	Unknown	0.44	Unknown
694	303.053	13.02	5.77	Putative metabolite	C10H13N3O6S1	0.02	glutathione C10H17N3O6S1 - H2 -> C10H15N3O6S1 - H2 -> C10H13N3O6S1
695	303.053	13.51	5.19	Putative metabolite	C10H13N3O6S1	-0.31	glutathione C10H17N3O6S1 - H2 -> C10H15N3O6S1 - H2 -> C10H13N3O6S1
696	116.123	3.01	5.19	Artifact	Ring_artifact_C6H12O2	0.7	4-Methylvaleric acid C6H12O2 + Ring_artifact -> Ring_artifact_C6H12O2
697	116.123	4.23	5.75	Artifact	Ring_artifact_C6H12O2	0.7	Caproic acid C6H12O2 + Ring_artifact -> Ring_artifact_C6H12O2
698	483.681	13.85	5.74	Artifact	H1K5O12S3	0.51	KHSO4 H1K1O4S1 + H1K1O4S1 + H1K1O4S1 -> H3K3O12S3 + H-2K2 -> H1K5O12S3
699	176.118	16.77	5.42	Artifact	[13]C2C4H14N4O2	1.62	L-Arginine C6H14N4O2 + [13]C1C-1 -> [13]C1C5H14N4O2 + [13]C1C-1 -> [13]C2C4H14N4O2
700	300.23	2.47	5.78	Artifact	C17H32O4	-0.13	Hypogeic acid C16H30O2 + C1H2O2 -> C17H32O4
701	242.581	2.37	5.72	Artifact	[13]C0.5C11.5H18O1S2	1.17	Peak 73 C12H18O1S2 + [13]C0.5C-0.5 -> [13]C0.5C11.5H18O1S2
702	242.581	3.38	4.36	Unknown	Unknown	0.42	Unknown
703	431.834	13.88	5.76	Artifact	C5H8K4O11S1	0.14	KHSO4 H1K1O4S1 + C2H3K1O2 + Peak 1704 -> C5H8K4O11S1
704	453.909	13.89	5.73	Artifact	C9H14K4O11	-0.13	CH3COOK C2H3K1O2 + C2H4O2 + Peak 173 -> C9H14K4O11
705	448.071	2.62	5.53	Artifact	C14H24O12S2	-0.63	Peak 96 C7H12O6S1 * 2 -> C14H24O12S2
706	313.94	13.89	5.74	Artifact	[41]K1C6H11K2O7	-0.26	CH3COOK C2H3K1O2 + C2H4O2 + [41]K1K-1 -> [41]K1C4H7O4 + C2H3K1O2 -> [41]K1C6H10K1O6 + H1K1O1 -> [41]K1C6H11K2O7
707	446.06	14.01	5.72	Metabolite	C11H20N4O11P2	0.18	CDP-Ethanolamine C11H20N4O11P2
708	509.452	2.48	5.65	Artifact	[13]C1C31H60O4	0.42	FAHFA(16:1(9Z)/5-O-16:0) C32H60O4 + [13]C1C-1 -> [13]C1C31H60O4
709	177.083	11.3	5.75	Artifact	[13]C1C5H12N2O4	0.91	L-2-Amino-4-methylenepentanedioic acid C6H9N1O4 + H3N1 -> C6H12N2O4 + [13]C1C-1 -> [13]C1C5H12N2O4
710	177.083	12.2	3.89	Unknown	Unknown	0.51	Unknown
711	201.061	13	5.78	Artifact	C6H12N1Na1O5	0.58	threonine C4H9N1O3 + C2H3Na1O2 -> C6H12N1Na1O5
712	387.844	13.88	5.77	Artifact	C4H8K4O9S1	-0.18	KHSO4 H1K1O4S1 + C2H3K1O2 + C2H3K1O2 -> C4H7K3O8S1 + H1K1O1 -> C4H8K4O9S1
713	487.165	12.99	5.75	Unknown	Unknown	0.29	Unknown
714	197.923	13.84	5.77	Artifact	C1H3K1O7S1	0.78	KHCO3 C1H1K1O3 + H2O4S1
715	614.147	14.18	5.78	Artifact	[34]S1C20H32N6O12S1	0.58	glutathione disulfide C20H32N6O12S2 + [34]S1S-1 -> [34]S1C20H32N6O12S1
716	390.152	13.63	5.71	Artifact	C11H27N4O9P1	-0.09	citrulline C6H13N3O3 + Peak 145 -> C11H27N4O9P1
717	248.101	11.27	5.78	Artifact	C9H16N2O6	0.55	Alanyl-Hydroxyproline C8H14N2O4 + C1H2O2 -> C9H16N2O6
718	194.031	14.18	5.82	Artifact	[18]O1C6H8O6	1.28	citrate/isocitrate C6H8O7 + [18]O1O-1 -> [18]O1C6H8O6
719	286.251	2.34	5.77	Metabolite	C17H34O3	-0.02	Avocadene C17H34O3
720	286.251	2.65	5.77	Metabolite	C17H34O3	-0.02	Avocadene C17H34O3
721	286.251	4.2	5.36	Metabolite	C17H34O3	0.33	Avocadene C17H34O3
722	256.978	13.89	5.74	Artifact	[13]C1C5H10K2O6	0.03	CH3COOK C2H3K1O2 + C2H4O2 + C2H3K1O2 -> C6H10K2O6 + [13]C1C-1 -> [13]C1C5H10K2O6
723	117.928	13	5.76	Unknown	Unknown	0.69	Unknown
724	117.928	11.33	4.33	Unknown	Unknown	0.69	Unknown
725	117.928	13.4	5.75	Artifact	Ring_artifact_C4H6O4	0.69	Methylmalonic acid C4H6O4 + Ring_artifact -> Ring_artifact_C4H6O4
726	820.319	2.53	5.72	Unknown	Unknown	0.24	Unknown
727	99.9564	1.99	5.8	Artifact	C1H1K1O3	-0.94	KHCO3 C1H1K1O3
728	464.226	2.08	4.6	Metabolite	C21H36O11	-1.59	Linalool oxide D 3-[apiosyl-(1->6)-glucoside] C21H36O11
729	176.088	12.23	5.79	Artifact	[13]C1C6H13N1O4	1.21	N-Carboxyethyl-g-aminobutyric acid C7H13N1O4 + [13]C1C-1 -> [13]C1C6H13N1O4
730	112.027	7.59	5.84	Artifact	C4H4N2O2	0.69	uridine C9H12N2O6 - Library_MS2_fragment -> C4H4N2O2
731	112.027	8.56	5.82	Metabolite	C4H4N2O2	0.69	Uracil C4H4N2O2
732	142.099	4.23	5.74	Metabolite	C8H14O2	-0.14	2-Octenoic acid C8H14O2
733	142.099	2.82	5.43	Artifact	C8H14O2	-0.14	(2xi,6xi)-7-Methyl-3-methylene-1,2,6,7-octanetetrol C10H20O4 - Library_MS2_fragment -> C8H14O2
734	176.116	16.79	5.8	Artifact	[18]O1C6H14N4O1	1.26	L-Arginine C6H14N4O2 + [18]O1O-1 -> [18]O1C6H14N4O1
735	407.009	13.5	5.67	Artifact	C10Cr1H17N3O9S1	0.14	glutathione C10H17N3O6S1 + Cr1O3 -> C10Cr1H17N3O9S1
736	431.852	13.88	5.77	Artifact	[41]K1C6H10K3O10S1	0.73	KHSO4 H1K1O4S1 + C2H3K1O2 + C2H3K1O2 -> C4H7K3O8S1 + C2H3K1O2 -> C6H10K4O10S1 + [41]K1K-1 -> [41]K1C6H10K3O10S1
737	315.104	13.45	5.68	Artifact	C10H18N3Na1O7	-0.18	Peak 1808 C10H19N3O7 + H-1Na1 -> C10H18N3Na1O7
738	409.767	13.85	5.66	Artifact	[41]K1H3K2O12S3	1.96	KHSO4 H1K1O4S1 + H1K1O4S1 + H1K1O4S1 -> H3K3O12S3 + [41]K1K-1 -> [41]K1H3K2O12S3
739	175.023	13.64	5.79	Artifact	Ring_artifact_C6H13N3O3	0.52	citrulline C6H13N3O3 + Ring_artifact -> Ring_artifact_C6H13N3O3
740	453.286	7.09	5.71	Artifact	C21H44N1O7P1	0.09	LysoPA(0:0/18:1(9Z)) C21H41O7P1 + H3N1 -> C21H44N1O7P1
741	453.286	3.07	5.49	Artifact	C21H44N1O7P1	0.09	LysoPA(0:0/18:1(9Z)) C21H41O7P1 + H3N1 -> C21H44N1O7P1
742	453.286	3.64	3.95	Metabolite	C21H44N1O7P1	0.09	LysoPE(0:0/16:0) C21H44N1O7P1
743	567.058	13.93	5.75	Artifact	[13]C1C14H24N2O17P2	-0.22	UDP-D-glucose C15H24N2O17P2 + [13]C1C-1 -> [13]C1C14H24N2O17P2
744	103.027	9.99	5.74	Artifact	C3H5N1O3	-0.55	CH3CN C2H3N1 + C1H2O3
745	323.052	14.02	5.74	Metabolite	C9H14N3O8P1	0.16	CMP C9H14N3O8P1
746	269.084	8.67	5.78	Artifact	[13]C1C9H12N4O5	0.09	inosine C10H12N4O5 + [13]C1C-1 -> [13]C1C9H12N4O5
747	201.064	7.6	4.39	Artifact	C8H11N1O5	0.61	uridine C9H12N2O6 - Library_MS2_fragment -> C8H11N1O5
748	304.091	7.59	5.76	Artifact	C11H16N2O8	-0.11	uridine C9H12N2O6 + C2H4O2 -> C11H16N2O8
749	517.212	13.89	5.47	Unknown	Unknown	0.28	Unknown
750	175.168	13.64	5.79	Artifact	Ring_artifact_C6H13N3O3	0.52	citrulline C6H13N3O3 + Ring_artifact -> Ring_artifact_C6H13N3O3
751	169.037	2.61	5.59	Metabolite	C7H7N1O4	0.64	2-Furoylglycine C7H7N1O4
752	326.282	2.44	5.7	Artifact	C20H38O3	-0.32	Stearic acid C18H36O2 + C2H4O2 -> C20H40O4 - H2O1 -> C20H38O3
753	144.297	4.2	5.54	Unknown	Unknown	0.6	Unknown
754	144.297	2.81	5.33	Unknown	Unknown	0.6	Unknown
755	256.674	2.47	5.54	Unknown	Unknown	0.41	Unknown
756	650.108	14.16	5.73	Artifact	C20H31K1N6O12S2	-0.09	glutathione disulfide C20H32N6O12S2 + H-1K1 -> C20H31K1N6O12S2
757	194.079	4.5	5.77	Metabolite	C7H14O6	0.71	D-4-O-Methyl-myo-inositol C7H14O6
758	488.317	2.44	5.68	Unknown	Unknown	0.29	Unknown
759	275.112	13.65	5.74	Metabolite	C10H17N3O6	0.13	Norophthalmic acid C10H17N3O6
760	190.12	4.21	5.66	Artifact	C9H18O4	0.57	Caprylic acid C8H16O2 + C1H2O2 -> C9H18O4
761	449.182	2.79	5.66	Putative metabolite	C19H32N1O9P1	-0.07	Fospropofol C13H21O5P1 + C6H10O5 -> C19H31O10P1 - H-1N-1O1 -> C19H32N1O9P1
762	196.094	16.77	5.76	Artifact	C6H13N4Na1O2	0.61	L-Arginine C6H14N4O2 + H-1Na1 -> C6H13N4Na1O2
763	196.095	7.49	5.63	Artifact	C7H16O6	0.96	2-Methylerythritol C5H12O4 + C2H4O2 -> C7H16O6
764	196.095	8.06	5.1	Artifact	C7H16O6	0.96	2-Methylerythritol C5H12O4 + C2H4O2 -> C7H16O6
765	160.085	13.27	5.49	Artifact	C6H12N2O3	1.2	L-2-Amino-5-hydroxypentanoic acid C5H11N1O3 + C1H1N1 -> C6H12N2O3
766	160.085	11.31	5.76	Artifact	C6H12N2O3	1.2	L-2-Amino-5-hydroxypentanoic acid C5H11N1O3 + C1H1N1 -> C6H12N2O3
767	160.085	13.66	5.5	Metabolite	C6H12N2O3	1.2	D-Alanyl-D-alanine C6H12N2O3
768	160.085	12.85	5.44	Artifact	C6H12N2O3	1.2	threonine C4H9N1O3 + C2H3N1 -> C6H12N2O3
769	333.181	2.06	5.66	Artifact	C17.5H27O6	-1.61	Coroloside C35H54O12 / 2 -> C17.5H27O6
770	97.8658	13.86	5.64	Unknown	Unknown	1.01	Unknown
771	278.014	7.05	5.74	Putative metabolite	C7H10N4O4S2	0.17	Methazolamide C5H8N4O3S2 + C2H2O1 -> C7H10N4O4S2
772	285.23	2.54	5.67	Artifact	Ring_artifact_[13]C1C17H36O2	0.38	Stearic acid C18H36O2 + [13]C1C-1 -> [13]C1C17H36O2 + Ring_artifact -> Ring_artifact_[13]C1C17H36O2
773	285.23	3.8	4.69	Metabolite	C16H31N1O3	-0.02	Myristoylglycine C16H31N1O3
774	673.157	2.51	5.46	Unknown	Unknown	0.25	Unknown
775	338.318	2.38	5.62	Metabolite	C22H42O2	-0.06	Erucic acid C22H42O2
776	399.131	13.03	5.7	Artifact	C13H25N3O9S1	0.63	Peak 3035 C12H24N2O9S1 + C1H1N1 -> C13H25N3O9S1
777	507.735	13.85	5.67	Artifact	C3H5K5O13S2	1.36	KHSO4 H1K1O4S1 + H2O4S1 + H-2K2 -> H1K3O8S2 + Peak 1704 -> C3H5K5O13S2
778	274.178	4.23	5.64	Metabolite	C14H26O5	0.09	3-Hydroxytetradecanedioic acid C14H26O5
779	273.1	2.6	5.71	Metabolite	C15H15N1O4	-0.34	L-Thyronine C15H15N1O4
780	178.046	7.13	4.93	Unknown	Unknown	0.51	Unknown
781	220.183	2.59	5.53	Metabolite	C15H24O1	0.52	Nootkatol C15H24O1
782	301.2	7.1	5.67	Artifact	C14H27N3O4	-0.14	Marimastat C15H29N3O5 - C1H2O1 -> C14H27N3O4
783	404.142	13.88	5.59	Artifact	[18]O1C14H26O12	-0.28	Lactose C12H22O11 + C2H4O2 -> C14H26O13 + [18]O1O-1 -> [18]O1C14H26O12
784	404.142	14.83	5.02	Artifact	[18]O1C14H26O12	-0.78	Melibiose C12H22O11 + C2H4O2 -> C14H26O13 + [18]O1O-1 -> [18]O1C14H26O12
785	554.341	7.09	5.66	Artifact	[13]C1C25H52N1O9P1	0.22	Peak 588 C27H54N1O10P1 - C1H2O1 -> C26H52N1O9P1 + [13]C1C-1 -> [13]C1C25H52N1O9P1
786	161.032	13.45	5.65	Artifact	C5H7N1O5	1.38	malate C4H6O5 + C1H1N1 -> C5H7N1O5
787	480.305	7.09	5.66	Artifact	[13]C1C22H46N1O7P1	0.09	LysoPA(0:0/18:0) C21H43O7P1 + C2H3N1 -> C23H46N1O7P1 + [13]C1C-1 -> [13]C1C22H46N1O7P1
788	275.112	11.66	4.74	Metabolite	C10H17N3O6	0.13	Norophthalmic acid C10H17N3O6
789	124.041	4.21	5.82	Artifact	[18]O1C7H6O1	0.2	Benzoic acid C7H6O2 + [18]O1O-1 -> [18]O1C7H6O1
790	264.078	13.46	5.65	Metabolite	C9H16N2O5S1	0.73	N-Acetylcystathionine C9H16N2O5S1
791	129.04	13.01	5.7	Artifact	C3H8N1Na1O3	0.68	alanine C3H7N1O2 + H1Na1O1 -> C3H8N1Na1O3
792	715.515	4.24	5.69	Metabolite	C39H74N1O8P1	-0.13	PE(14:0/20:2(11Z,14Z)) C39H74N1O8P1
793	715.515	3.04	5.57	Metabolite	C39H74N1O8P1	-0.27	PE(14:0/20:2(11Z,14Z)) C39H74N1O8P1
794	174.145	16.77	4.9	Artifact	Ring_artifact_C6H14N4O2	0.52	L-Arginine C6H14N4O2 + Ring_artifact -> Ring_artifact_C6H14N4O2
795	193.965	13.94	5.75	Artifact	C2H7K1O6Si1	1.01	H4SiO4 H4O4Si1 + C2H3K1O2
796	384.122	13.4	5.68	Metabolite	C14H20N6O5S1	0.23	S-adenosyl-L-homoCysteine C14H20N6O5S1
797	89.0559	13.02	5.78	Artifact	Ring_artifact_C3H7N1O2	1.09	alanine C3H7N1O2 + Ring_artifact -> Ring_artifact_C3H7N1O2
798	467.781	13.85	5.6	Artifact	H6K2O16S4	0.39	KHSO4 H1K1O4S1 + H2O4S1 + H1K1O4S1 -> H4K2O12S3 + H2O4S1 -> H6K2O16S4
799	174.1	11.3	5.71	Metabolite	C7H14N2O3	0.82	N-Acetylornithine C7H14N2O3
800	174.1	13.6	5.47	Metabolite	C7H14N2O3	0.24	N-acetyl-L-ornithine C7H14N2O3
801	174.1	11.9	5.22	Metabolite	C7H14N2O3	0.82	N-Acetylornithine C7H14N2O3
802	174.1	13.09	4.75	Metabolite	C7H14N2O3	0.82	N-Acetylornithine C7H14N2O3
803	225.039	2.58	5.51	Artifact	[13]C1C6H12O6S1	-0.38	Peak 96 C7H12O6S1 + [13]C1C-1 -> [13]C1C6H12O6S1
804	664.113	13.92	5.71	Artifact	[13]C1C20H27N7O14P2	-0.19	NAD C21H27N7O14P2 + [13]C1C-1 -> [13]C1C20H27N7O14P2
805	252.209	2.5	5.69	Artifact	C16H28O2	-0.67	Nootkatol C15H24O1 + C1H4O1 -> C16H28O2
806	529.293	7.1	5.61	Unknown	Unknown	0.28	Unknown
807	209.065	13.38	5.72	Artifact	C5H11N3O6	0.89	glutamine C5H10N2O3 + H1N1O3 -> C5H11N3O6
808	281.641	2.44	5.57	Unknown	Unknown	0.38	Unknown
809	218.983	13.02	5.71	Artifact	C4Cr1H9N1O6	0.43	threonine C4H9N1O3 + Cr1O3 -> C4Cr1H9N1O6
810	241.212	2.5	5.54	Artifact	[13]C1C14H28O2	-0.06	9-Pentadecenoic acid C15H28O2 + [13]C1C-1 -> [13]C1C14H28O2
811	428.329	2.75	5.67	Metabolite	C28H44O3	0.11	Ercalcitriol C28H44O3
812	272.089	16.77	5.66	Artifact	C8H17K1N4O4	0.32	L-Arginine C6H14N4O2 + C2H3K1O2 -> C8H17K1N4O4
813	203.09	11.34	5.65	Metabolite	C7H13N3O4	0.52	Alanyl-Asparagine C7H13N3O4
814	203.09	13.08	5.07	Metabolite	C7H13N3O4	0.52	Alanyl-Asparagine C7H13N3O4
815	203.091	11.86	4.61	Metabolite	C7H13N3O4	0.03	Alanyl-Asparagine C7H13N3O4
816	203.09	12.77	5.07	Metabolite	C7H13N3O4	0.52	Alanyl-Asparagine C7H13N3O4
817	491.864	13.9	5.6	Artifact	C7H13K4O13P1	0.01	CH3COOK C2H3K1O2 + C2H4O2 + Peak 1397 -> C7H13K4O13P1
818	303.073	7.63	5.69	Artifact	C10Cl1H14N5O4	0.43	Adenosine C10H13N5O4 + Cl1H1 -> C10Cl1H14N5O4
819	207.089	3.04	5.46	Metabolite	C11H13N1O3	0.21	N-(3-Phenylpropionyl)glycine C11H13N1O3
820	207.089	5.78	5.64	Metabolite	C11H13N1O3	0.69	N-Acetyl-L-phenylalanine C11H13N1O3
821	207.089	4.23	5.62	Metabolite	C11H13N1O3	0.69	N-Acetyl-L-phenylalanine C11H13N1O3
822	227.082	13.01	5.68	Artifact	C7H17N1O5S1	1.51	Peak 2121 C8H19N1O6S1 - C1H2O1 -> C7H17N1O5S1
823	316.065	2.71	5.42	Artifact	C10H12N4O8	0.99	Peak 926 C11H12N4O10 - C1O2 -> C10H12N4O8
824	176.058	5.91	5.72	Putative metabolite	C9H8N2O2	1.01	tryptophan C11H12N2O2 - C2H4 -> C9H8N2O2
825	480.304	3.07	5.52	Artifact	[13]C1C22H46N1O7P1	0.51	LysoPE(0:0/18:1(11Z)) C23H46N1O7P1 + [13]C1C-1 -> [13]C1C22H46N1O7P1
826	332.181	13.25	4.52	Putative metabolite	C20H28O2S1	0.3	Retinoic Acid C20H28O2 + S1 -> C20H28O2S1
827	335.846	13.92	5.66	Artifact	C4H4K4O8	-0.46	KHCO3 C1H1K1O3 + C2H3K1O2 + C1H1K1O3 -> C4H5K3O8 + H-1K1 -> C4H4K4O8
828	189.1	13.03	4.76	Metabolite	C8H15N1O4	0.57	N-Methylcalystegine B2 C8H15N1O4
829	351.877	13.91	5.59	Artifact	C5H8K4O8	0.13	KHCO3 C1H1K1O3 + C2H3K1O2 + C2H3K1O2 -> C5H7K3O7 + H1K1O1 -> C5H8K4O8
830	541.061	13.91	5.61	Metabolite	C15H21N5O13P2	0.76	Cyclic-ADP-ribose C15H21N5O13P2
831	322.149	13.59	5.69	Artifact	C11H22N4O7	0.46	glutamate C5H9N1O4 + Peak 15 -> C11H22N4O7
832	370.205	16.77	5.7	Artifact	C12H27N8Na1O4	-0.01	L-Arginine C6H14N4O2 + Peak 762 -> C12H27N8Na1O4
833	183.064	11.29	5.62	Artifact	C7H9N3O3	1.04	5-Hydroxymethyl-4-methyluracil C6H8N2O3 + C1H1N1 -> C7H9N3O3
834	138.032	2.4	5.69	Metabolite	C7H6O3	0.68	4-Hydroxybenzoic acid C7H6O3
835	191.972	7.19	5.66	Artifact	C3Cr1H8O6	0.5	Glycerol C3H8O3 + Cr1O3 -> C3Cr1H8O6
836	254.097	3.43	4.11	Unknown	Unknown	0.41	Unknown
837	223.071	14.16	5.69	Artifact	[13]C1C6H14N2O4S1	0.37	cystathionine C7H14N2O4S1 + [13]C1C-1 -> [13]C1C6H14N2O4S1
838	128.024	7.02	5.71	Artifact	C3Cl1H9O3	0.17	Glycerol C3H8O3 + Cl1H1 -> C3Cl1H9O3
839	483.968	14.37	5.65	Metabolite	C9H15N2O15P3	0.26	UTP C9H15N2O15P3
840	334.067	14	5.67	Metabolite	C9H19O11P1	-0.31	1-(sn-Glycero-3-phospho)-1D-myo-inositol C9H19O11P1
841	118.088	4.24	5.55	Artifact	[18]O1C6H12O1	0.64	Caproic acid C6H12O2 + [18]O1O-1 -> [18]O1C6H12O1
842	288.059	11.31	5.65	Metabolite	C10H12N2O8	-0.12	Orotidine C10H12N2O8
843	176.043	13.63	5.68	Metabolite	C5H8N2O5	1.26	N-carbamoyl-L-aspartate C5H8N2O5
844	154.073	7.2	5.89	Artifact	[18]O1C5H12O4	0.77	Ribitol C5H12O5 + [18]O1O-1 -> [18]O1C5H12O4
845	201.136	4.23	5.61	Metabolite	C10H19N1O3	0.46	Capryloylglycine C10H19N1O3
846	201.137	2.91	5.18	Metabolite	C10H19N1O3	-0.03	N-Octanoylglycine C10H19N1O3
847	201.136	3.81	5.51	Metabolite	C10H19N1O3	0.46	Capryloylglycine C10H19N1O3
848	133.085	13.59	5.49	Artifact	Ring_artifact_C4H7N1O4	0.63	aspartate C4H7N1O4 + Ring_artifact -> Ring_artifact_C4H7N1O4
849	319.128	13.58	5.67	Artifact	[18]O1C10H24N1O7P1	1.25	Glycerophosphocholine C8H20N1O6P1 + C2H4O2 -> C10H24N1O8P1 + [18]O1O-1 -> [18]O1C10H24N1O7P1
850	554.341	3.07	5.09	Artifact	[13]C1C25H52N1O9P1	0.22	LysoPE(0:0/20:1(11Z)) C25H50N1O7P1 + C1H2O2 -> C26H52N1O9P1 + [13]C1C-1 -> [13]C1C25H52N1O9P1
851	196.948	13.85	5.66	Artifact	[13]C1C1H5K1O6S1	0.74	KHSO4 H1K1O4S1 + C2H4O2 + [13]C1C-1 -> [13]C1C1H5K1O6S1
852	306.256	2.43	5.56	Metabolite	C20H34O2	-0.06	8,11,14-Eicosatrienoic acid C20H34O2
853	129.062	13.39	5.65	Artifact	[13]C1C4H8N2O2	0.25	glutamine C5H10N2O3 + [13]C1C-1 -> [13]C1C4H10N2O3 - H2O1 -> [13]C1C4H8N2O2
854	469.789	13.88	5.56	Artifact	C5H7K5O11S1	0.73	KHSO4 H1K1O4S1 + C2H3K1O2 + Peak 545 -> C5H7K5O11S1
855	270.096	13.59	5.62	Metabolite	C10H14N4O5	1.18	Aspartyl-Histidine C10H14N4O5
856	447.723	13.85	5.59	Artifact	[41]K1H2K3O12S3	1.53	KHSO4 H1K1O4S1 + H1K1O4S1 + H-1K1 -> H1K3O8S2 + H1K1O4S1 -> H2K4O12S3 + [41]K1K-1 -> [41]K1H2K3O12S3
857	235.072	2.39	5.61	Putative metabolite	C11H11N2O4	1.2	Aminochrome o-semiquinone C8H8N1O2 + H1N1 -> C8H9N2O2 + C2H2O1 -> C10H11N2O3 + C1O1 -> C11H11N2O4
858	217.952	13.31	5.64	Artifact	C4Cr1H6O7	0.73	Methylmalonic acid C4H6O4 + Cr1O3 -> C4Cr1H6O7
859	282.87	2.44	5.56	Unknown	Unknown	0.38	Unknown
860	258.085	5.29	5.68	Metabolite	C10H14N2O6	-0.05	Ribothymidine C10H14N2O6
861	258.085	7.96	4.38	Metabolite	C10H14N2O6	-0.05	Ribothymidine C10H14N2O6
862	302.085	2.65	5.48	Artifact	C9H18O11	0.37	Peak 183 C7H14O9 + C2H4O2 -> C9H18O11
863	576.017	13.86	5.63	Artifact	C14H26K2O17S1	-0.55	Lactose C12H22O11 + H1K1O4S1 -> C12H23K1O15S1 + C2H3K1O2 -> C14H26K2O17S1
864	244.035	7.06	5.61	Metabolite	C6H13O8P1	0.43	Fucose 1-phosphate C6H13O8P1
865	408.228	7.1	5.64	Metabolite	C19H37O7P1	-0.27	1-palmitoyl-dihydroxyacetone-phosphate C19H37O7P1
866	262.08	13.39	5.63	Artifact	C9H14N2O7	0.77	Peak 1993 C8H12N2O4 + C1H2O3 -> C9H14N2O7
867	262.08	14.02	4.87	Metabolite	C9H14N2O7	0.77	L-beta-aspartyl-L-glutamic acid C9H14N2O7
868	246.085	7.85	5.63	Metabolite	C9H14N2O6	0.35	5,6-Dihydrouridine C9H14N2O6
869	246.084	9.06	5.05	Artifact	[34]S1C10H16N2O3	0.65	biotin C10H16N2O3S1 + [34]S1S-1 -> [34]S1C10H16N2O3
870	342.203	2.07	5.61	Artifact	[34]S1C19H32O3	-0.26	Peak 84 C19H32O3S1 + [34]S1S-1 -> [34]S1C19H32O3
871	348.066	13.73	5.65	Artifact	[13]C1C9H14N5O7P1	0.11	dGMP C10H14N5O7P1 + [13]C1C-1 -> [13]C1C9H14N5O7P1
872	299.29	2.41	5.61	Artifact	[13]C1C18H38O2	0.79	Nonadecanoic acid C19H38O2 + [13]C1C-1 -> [13]C1C18H38O2
873	140.03	13.42	5.56	Artifact	[13]C1C5H5N1O3	-0.02	4-Nitrophenol C6H5N1O3 + [13]C1C-1 -> [13]C1C5H5N1O3
874	210.162	2.7	5.61	Metabolite	C13H22O2	0.38	Linalyl propionate C13H22O2
875	210.162	4.17	5.17	Metabolite	C13H22O2	0.38	Linalyl propionate C13H22O2
876	433.202	13.61	5.58	Artifact	[13]C1C13H33N4O9P1	0.16	citrulline C6H13N3O3 + Peak 1326 -> C14H33N4O9P1 + [13]C1C-1 -> [13]C1C13H33N4O9P1
877	254.653	2.48	5.5	Unknown	Unknown	0.41	Unknown
878	354.179	2.57	5.54	Artifact	C17H26N2O6	-0.32	Cyclopentolate C17H25N1O3 + H1N1O3 -> C17H26N2O6
879	178.095	13	5.63	Artifact	C6H14N2O4	0.88	alanine C3H7N1O2 * 2 -> C6H14N2O4
880	312.105	2.96	5.09	Putative metabolite	C16H16N4O1S1	-0.38	Sulfaphenazole C15H14N4O2S1 + C2H4 -> C17H18N4O2S1 - C1H2O1 -> C16H16N4O1S1
881	312.105	14.19	4.42	Artifact	C10H17N4Na1O6	-0.39	Argininosuccinic acid C10H18N4O6 + H-1Na1 -> C10H17N4Na1O6
882	390.141	13.58	5.61	Artifact	C12H27N2O10P1	-0.69	Peak 3049 C11H26N1O10P1 + C1H1N1 -> C12H27N2O10P1
883	280.102	11.31	5.61	Artifact	C8H16N4O7	0.35	N-a-Acetylcitrulline C8H15N3O4 + H1N1O3 -> C8H16N4O7
884	197.077	13.65	5.57	Artifact	C6H12N3Na1O3	0.69	citrulline C6H13N3O3 + H-1Na1 -> C6H12N3Na1O3
885	197.077	14.38	4.08	Unknown	Unknown	0.48	Unknown
886	192.111	6.17	5.67	Putative metabolite	C7H16N2O4	0.04	N-Carboxyethyl-g-aminobutyric acid C7H13N1O4 + H3N1 -> C7H16N2O4
887	120.031	13.31	5.64	Artifact	[18]O1C4H6O3	1.29	Methylmalonic acid C4H6O4 + [18]O1O-1 -> [18]O1C4H6O3
888	244.058	13.37	4.63	Metabolite	C10H12O7	0.83	1-O-Galloylglycerol C10H12O7
889	281.757	2.44	5.4	Unknown	Unknown	0.38	Unknown
890	332.881	13.87	5.57	Artifact	[13]C1C3H7K3O8S1	-0.79	KHSO4 H1K1O4S1 + C2H3K1O2 + C2H3K1O2 -> C4H7K3O8S1 + [13]C1C-1 -> [13]C1C3H7K3O8S1
891	428.329	4.22	5.58	Metabolite	C28H44O3	0.57	Ercalcitriol C28H44O3
892	231.031	13.65	5.6	Artifact	C5Cr1H13N3O4	0.92	citrulline C6H13N3O3 + Cr1O3 -> C6Cr1H13N3O6 - C1O2 -> C5Cr1H13N3O4
893	231.03	14.32	4.27	Artifact	C8H10N1O5P1	0.69	pyridoxamine-5-phosphate C8H13N2O5P1 - H3N1 -> C8H10N1O5P1
894	240.001	13.93	5.58	Artifact	C6H10K1Na1O6	0.06	CH3COOK C2H3K1O2 + C2H4O2 + C2H3Na1O2 -> C6H10K1Na1O6
895	240.001	14.41	5.35	Artifact	C6H10K1Na1O6	0.06	CH3COOK C2H3K1O2 + C2H3Na1O2 + C2H4O2 -> C6H10K1Na1O6
896	332.079	13.49	5.6	Artifact	C11H16N4O6S1	0.17	Peak 403 C10H15N3O6S1 + C1H1N1 -> C11H16N4O6S1
897	297.081	9.47	5.65	Artifact	C8H15N3O9	0.1	L-beta-aspartyl-L-threonine C8H14N2O6 + H1N1O3 -> C8H15N3O9
898	331.069	13.51	4.52	Metabolite	C10H14N5O6P1	-1.6	dAMP C10H14N5O6P1
899	308.272	2.41	5.59	Metabolite	C20H36O2	-0.23	Eicosadienoic acid C20H36O2
900	529.077	2.74	5.29	Artifact	C16H20N7O10P1Si1	1.23	nicotinamide C6H6N2O1 + C10H12N5O6P1 + H2O3Si1 -> C16H20N7O10P1Si1
901	209.072	13	5.57	Artifact	C6H15N1O5Si1	0.71	alanine C3H7N1O2 + C3H8O3Si1 -> C6H15N1O5Si1
902	228.173	2.77	5.58	Metabolite	C13H24O3	0.2	11-Hydroxy-9-tridecenoic acid C13H24O3
903	317.199	2.52	5.51	Metabolite	C19H27N1O3	0.61	Nateglinide C19H27N1O3
904	317.199	3.74	4.45	Metabolite	C19H27N1O3	0.3	Nateglinide C19H27N1O3
905	243.067	2.61	5.2	Artifact	[13]C1C6H14O9	0.15	Peak 183 C7H14O9 + [13]C1C-1 -> [13]C1C6H14O9
906	243.066	5.93	4.05	Putative metabolite	C11Cl1H14N1O3	-0.32	Lorcaserin sulfamate C11Cl1H14N1O3S1 - S1 -> C11Cl1H14N1O3
907	164.047	12.42	5.66	Metabolite	C9H8O3	0.27	Phenylpyruvic acid C9H8O3
908	267.119	2.78	5.54	Artifact	[13]C1C13H18O5	0.29	3',4',5'-Trimethoxycinnamyl alcohol acetate C14H18O5 + [13]C1C-1 -> [13]C1C13H18O5
909	214.093	16.25	5.64	Artifact	C7H15N2Na1O4	0.24	ornithine C5H12N2O2 + C2H3Na1O2 -> C7H15N2Na1O4
910	330.165	13.72	5.56	Artifact	C12H22N6O5	-0.1	Arginyl-Glutamic acid C11H21N5O5 + C1H1N1 -> C12H22N6O5
911	88.9399	13.01	5.4	Unknown	Unknown	1.09	Unknown
912	282.325	2.44	5.5	Artifact	Ring_artifact_C18H34O2	0.38	Oleic acid C18H34O2 + Ring_artifact -> Ring_artifact_C18H34O2
913	331.076	8.67	5.64	Artifact	C10H13N5O8	0.04	inosine C10H12N4O5 + H1N1O3 -> C10H13N5O8
914	331.075	11.42	3.9	Putative metabolite	C9H17N1O12	0.23	Melibiose C12H22O11 + C2H2O1 -> C14H24O12 - C5H8 -> C9H16O12 + H1N1 -> C9H17N1O12
915	395.885	13.9	5.52	Artifact	[41]K1C7H10K3O9	0.07	KHCO3 C1H1K1O3 + C2H3K1O2 + C2H3K1O2 -> C5H7K3O7 + C2H3K1O2 -> C7H10K4O9 + [41]K1K-1 -> [41]K1C7H10K3O9
916	316.089	2.52	5.27	Putative metabolite	C10H14N5O7	0.39	7-methylguanosine C11H16N5O5 + H2O1 -> C11H18N5O6 + C1O1 -> C12H18N5O7 - C2H4 -> C10H14N5O7
917	113.031	5.33	5.64	Unknown	Unknown	0.72	Unknown
918	113.031	8.52	4.48	Artifact	[13]C1C3H4N2O2	0.28	Uracil C4H4N2O2 + [13]C1C-1 -> [13]C1C3H4N2O2
919	113.031	7.59	4.47	Artifact	[13]C1C3H4N2O2	0.28	Uracil C4H4N2O2 + [13]C1C-1 -> [13]C1C3H4N2O2
920	214.095	13.42	4.31	Artifact	C9H14N2O4	0.27	Glycylproline C7H12N2O3 + C2H4O2 -> C9H16N2O5 - H2O1 -> C9H14N2O4
921	214.094	9.91	3.92	Artifact	[18]O1C7H16O6	0.23	D-Arabitol C5H12O5 + C2H4O2 -> C7H16O7 + [18]O1O-1 -> [18]O1C7H16O6
922	272.044	13.39	4.51	Artifact	C8H13N2Na1O5S1	-0.05	gamma-Glutamylcysteine C8H14N2O5S1 + H-1Na1 -> C8H13N2Na1O5S1
923	147.241	13.51	5.49	Unknown	Unknown	0.59	Unknown
924	238.157	2.37	5.53	Metabolite	C14H22O3	-0.44	Geranyl acetoacetate C14H22O3
925	238.157	2.68	5.53	Metabolite	C14H22O3	-0.02	Geranyl acetoacetate C14H22O3
926	360.055	2.66	5.66	Artifact	C11H20O9S2	-0.35	Peak 472 C9H16O7S2 + C2H4O2 -> C11H20O9S2
927	260.023	14.15	5.54	Artifact	C7H13K1N2O4S1	0.04	cystathionine C7H14N2O4S1 + H-1K1 -> C7H13K1N2O4S1
928	318.233	2.43	5.48	Unknown	Unknown	0.36	Unknown
929	227.073	2.83	5.45	Artifact	[13]C1C6H14O8	-1.66	2,3,4,5,6,7-Hexahydroxyheptanoic acid C7H14O8 + [13]C1C-1 -> [13]C1C6H14O8
930	416.314	2.67	5.56	Artifact	C23H44O6	-0.51	Stearic acid C18H36O2 + C6H10O5 - C1H2O1 -> C23H44O6
931	282.043	7.59	5.62	Artifact	[37]Cl1C9H13N2O6	0.23	uridine C9H12N2O6 + Cl1H1 -> C9Cl1H13N2O6 + [37]Cl1Cl-1 -> [37]Cl1C9H13N2O6
932	381.04	2.93	5.41	Putative metabolite	C9H19N1O11S2	-0.13	3-Deoxy-D-glycero-D-galacto-2-nonulosonic acid C9H16O9 + H3N1O-1 -> C9H19N1O8 + O3S1 -> C9H19N1O11S1 + S1 -> C9H19N1O11S2
933	175.954	14.22	5.59	Artifact	H5O7P1Si1	0.66	H2SiO3 H2O3Si1 + H3O4P1
934	687.484	4.24	5.56	Metabolite	C37H70N1O8P1	-0.14	PE(14:0/18:2(9Z,12Z)) C37H70N1O8P1
935	687.484	3.04	5.52	Metabolite	C37H70N1O8P1	-0.28	PE(14:0/18:2(9Z,12Z)) C37H70N1O8P1
936	122.079	4.22	6	Artifact	Ring_artifact_C7H6O2	0.67	Benzoic acid C7H6O2 + Ring_artifact -> Ring_artifact_C7H6O2
937	172.121	4.24	5.47	Putative metabolite	C8H16N2O2	1.03	N-Acetyl-L-leucine C8H15N1O3 - H-1N-1O1 -> C8H16N2O2
938	172.121	3.18	4.71	Putative metabolite	C8H16N2O2	0.45	N-Acetyl-L-leucine C8H15N1O3 - H-1N-1O1 -> C8H16N2O2
939	282.303	2.43	5.5	Artifact	Ring_artifact_C18H34O2	0.38	Oleic acid C18H34O2 + Ring_artifact -> Ring_artifact_C18H34O2
940	307.074	14.19	5.59	Artifact	[34]S0.5C10H16N3O6S0.5	-0.07	glutathione disulfide C20H32N6O12S2 / 2 -> C10H16N3O6S1 + [34]S0.5S-0.5 -> [34]S0.5C10H16N3O6S0.5
941	791.531	3.07	5.55	Artifact	C41H78N1O11P1	-0.19	PS(16:0/18:2(9Z,12Z)) C40H74N1O10P1 + C1H4O1 -> C41H78N1O11P1
942	791.531	4.41	5.57	Putative metabolite	C41H78N1O11P1	0.06	PS(16:0/18:0) C40H78N1O10P1 + C1O1 -> C41H78N1O11P1
943	451.1	2.56	5.44	Unknown	Unknown	0.3	Unknown
944	250.09	3.36	4	Putative metabolite	C16F1H11N2	0.51	Citalopram propionic acid C18F1H14N1O3 - C2H2O1 -> C16F1H12N1O2 - H2O1 -> C16F1H10N1O1 - H-1N-1O1 -> C16F1H11N2
945	228.066	2.84	5.49	Artifact	C6H16O7Si1	1.88	2-Hydroxycaproic acid C6H12O3 + H4O4Si1 -> C6H16O7Si1
946	179.042	7.15	5.6	Artifact	[34]S1C6H11N1O3	0.34	N-Formyl-L-methionine C6H11N1O3S1 + [34]S1S-1 -> [34]S1C6H11N1O3
947	325.262	2.44	5.53	Putative metabolite	C19H35N1O3	0.29	N-Lauroylglycine C14H27N1O3 + C5H8 -> C19H35N1O3
948	234.89	13.84	5.48	Artifact	[41]K0.5H3K0.5O8S2	-0.85	KHSO4 H1K1O4S1 + H2O4S1 + [41]K0.5K-0.5 -> [41]K0.5H3K0.5O8S2
949	297.089	5	5.56	Metabolite	C11H15N5O3S1	0.54	5'-Methylthioadenosine C11H15N5O3S1
950	317.082	2.57	5.35	Unknown	Unknown	0.36	Unknown
951	240.103	4.2	5.5	Artifact	C8H20O6Si1	0.48	Caprylic acid C8H16O2 + H4O4Si1 -> C8H20O6Si1
952	240.103	2.82	5.41	Artifact	Ring_artifact_C8H16O6S1	0.42	2-Hydroxyoctanoic acid C8H16O3 + O3S1 + Ring_artifact -> Ring_artifact_C8H16O6S1
953	242.188	2.68	5.55	Metabolite	C14H26O3	-0.02	3-Oxotetradecanoic acid C14H26O3
954	921.572	2.45	5.47	Artifact	[13]C1C56H76Mg1N4O5	-1.99	Peak 517 C57H76Mg1N4O5 + [13]C1C-1 -> [13]C1C56H76Mg1N4O5
955	309.081	7.85	5.56	Artifact	C9H15N3O9	-0.23	5,6-Dihydrouridine C9H14N2O6 + H1N1O3 -> C9H15N3O9
956	462.301	2.47	5.34	Artifact	C23H46O7Si1	-0.04	Oleic acid C18H34O2 + C2H4O2 -> C20H38O4 + C3H8O3Si1 -> C23H46O7Si1
957	258.219	4.22	5.39	Metabolite	C15H30O3	0.37	10-Hydroxymyristic acid methyl ester C15H30O3
958	258.219	2.75	5.56	Metabolite	C15H30O3	-0.02	10-Hydroxymyristic acid methyl ester C15H30O3
959	314.102	3.06	5.09	Unknown	Unknown	0.36	Unknown
960	574.227	13.58	5.5	Artifact	C18H44N2O14P2	0.31	Peak 34 C10H24N1O8P1 + Peak 1326 -> C18H44N2O14P2
961	137.042	7.67	5.59	Artifact	[13]C1C4H4N4O1	1.21	hypoxanthine C5H4N4O1 + [13]C1C-1 -> [13]C1C4H4N4O1
962	137.042	8.67	3.98	Unknown	Unknown	0.62	Unknown
963	218.115	7.1	5.33	Metabolite	C10H18O5	0.57	3-Hydroxysebacic acid C10H18O5
964	208.019	2.33	5.49	Putative metabolite	C10H8O3S1	0.55	Methoxsalen C12H8O4 + H2S1 -> C12H10O4S1 - C2H2O1 -> C10H8O3S1
965	267.097	7.62	5.57	Metabolite	C10H13N5O4	0.58	Adenosine C10H13N5O4
966	267.097	8.65	4.22	Metabolite	C10H13N5O4	0.58	adenosine C10H13N5O4
967	366.238	2.45	5.58	Artifact	C19H35Na1O5	0.05	Oleic acid C18H34O2 + C1H1Na1O3 -> C19H35Na1O5
968	245.174	13.44	5.56	Metabolite	C11H23N3O3	0.99	Lysyl-Valine C11H23N3O3
969	245.174	13.75	5.56	Metabolite	C11H23N3O3	0.99	Lysyl-Valine C11H23N3O3
970	351.216	2.48	5.44	Artifact	[13]C1C15H34O6Si1	-0.51	Hypogeic acid C16H30O2 + [13]C1C-1 -> [13]C1C15H30O2 + H4O4Si1 -> [13]C1C15H34O6Si1
971	351.215	2.09	5.6	Unknown	Unknown	0.34	Unknown
972	555.354	7.09	5.48	Artifact	C26H54N1O9P1	-0.33	Peak 3191 C27H56N1O10P1 - C1H2O1 -> C26H54N1O9P1
973	149.015	11.26	5.51	Putative metabolite	C4H7N1O3S1	0.43	N-Formyl-L-methionine C6H11N1O3S1 - C2H4 -> C4H7N1O3S1
974	149.015	10.38	4.22	Putative metabolite	C4H7N1O3S1	0.43	N-Formyl-L-methionine C6H11N1O3S1 - C2H4 -> C4H7N1O3S1
975	390.084	2.63	5.34	Artifact	C14Ca1H22O10	-0.29	2-Octenoic acid C8H14O2 + C2Ca1H2O2 -> C10Ca1H16O4 + Peak 240 -> C14Ca1H22O10
976	426.131	13.02	5.58	Artifact	C15H26N2O10S1	0.27	Peak 2909 C13H23N1O10S1 + C2H3N1 -> C15H26N2O10S1
977	157.074	12.24	5.58	Metabolite	C7H11N1O3	0.59	3-Methylcrotonylglycine C7H11N1O3
978	235.895	13.85	5.52	Artifact	[34]S1C2H4K2O6	2.41	KHSO4 H1K1O4S1 + C2H3K1O2 + [34]S1S-1 -> [34]S1C2H4K2O6
979	253.796	2.47	5.36	Unknown	Unknown	0.41	Unknown
980	338.208	2.5	4.96	Unknown	Unknown	0.35	Unknown
981	228.115	2.73	5.51	Metabolite	C15H16O2	0.13	Nabumetone C15H16O2
982	90.0446	13.02	6.37	Artifact	[15]N1C3H7O2	1.15	alanine C3H7N1O2 + [15]N1N-1 -> [15]N1C3H7O2
983	280.011	7.05	5.57	Artifact	C6Cl1H14O8P1	0.29	Fucose 1-phosphate C6H13O8P1 + Cl1H1 -> C6Cl1H14O8P1
984	250.095	3.97	3.73	Unknown	Unknown	0.41	Unknown
985	405.159	13.55	5.49	Artifact	[13]C1C12H29N2O10P1	0.34	Peak 263 C13H29N2O10P1 + [13]C1C-1 -> [13]C1C12H29N2O10P1
986	157.789	13.87	5.36	Unknown	Unknown	0.56	Unknown
987	598.091	13.88	5.58	Artifact	C16H32K1O19P1	-0.09	Lactose C12H22O11 + C2H4O2 -> C14H26O13 + C2H3K1O2 -> C16H29K1O15 + H3O4P1 -> C16H32K1O19P1
988	133.082	4.2	5.62	Artifact	[13]C1C5H12O3	0.74	Hexyl glucoside C12H24O6 / 2 -> C6H12O3 + [13]C1C-1 -> [13]C1C5H12O3
989	133.082	2.94	4.75	Artifact	[13]C1C5H12O3	0.74	2-Hydroxycaproic acid C6H12O3 + [13]C1C-1 -> [13]C1C5H12O3
990	143.933	4.2	5.52	Artifact	C1H4O3Se1	-0.24	Hydrogen selenide H2Se1 + C1H2O3
991	245.021	13.49	5.55	Artifact	C7Ca1H11N1O6	0.93	glutamate C5H9N1O4 + C2Ca1H2O2 -> C7Ca1H11N1O6
992	455.059	2.8	5.31	Putative metabolite	C19F3H16N3O3S2	-0.4	Celecoxib C17F3H14N3O2S1 + C2H2O1 -> C19F3H16N3O3S1 + S1 -> C19F3H16N3O3S2
993	382.211	2.49	5.43	Artifact	C19H30N2O6	-0.3	Homocapsaicin C19H29N1O3 + H1N1O3 -> C19H30N2O6
994	382.211	3.74	4.05	Artifact	C19H30N2O6	-0.3	Homocapsaicin C19H29N1O3 + H1N1O3 -> C19H30N2O6
995	333.857	13.84	5.52	Artifact	C3H5K3O9S1	-0.45	KHSO4 H1K1O4S1 + C2H3K1O2 + C1H1K1O3 -> C3H5K3O9S1
996	445.04	13.77	5.46	Artifact	C12H17K1N5O9P1	0.44	dGMP C10H14N5O7P1 + C2H3K1O2 -> C12H17K1N5O9P1
997	247.037	13.01	5.56	Artifact	C7Ca1H13N1O6	0.72	alanine C3H7N1O2 + C2H4O2 -> C5H11N1O4 + C2Ca1H2O2 -> C7Ca1H13N1O6
998	90.0537	13.01	5.58	Artifact	[2]H1C3H6N1O2	2.83	alanine C3H7N1O2 + [2]H1H-1 -> [2]H1C3H6N1O2
999	282.204	2.43	5.56	Artifact	Ring_artifact_C18H34O2	0.38	Oleic acid C18H34O2 + Ring_artifact -> Ring_artifact_C18H34O2
1000	208.037	11.85	5.54	Metabolite	C10H8O5	0.35	3-(2H-1,3-benzodioxol-5-yl)-3-oxopropanoic acid C10H8O5
1001	96.9596	13.84	5.21	Unknown	Unknown	1.01	Unknown
1002	96.9596	7.22	5.57	Artifact	C1N1Na1O1S1	2.77	Hypothiocyanite C1H1N1O1S1 + H-1Na1
1003	89.0398	13.03	5.66	Artifact	Ring_artifact_C3H7N1O2	1.09	alanine C3H7N1O2 + Ring_artifact -> Ring_artifact_C3H7N1O2
1004	228.968	13.49	5.54	Artifact	C5Cr1H7N1O6	0.19	glutamate C5H9N1O4 - H2O1 -> C5H7N1O3 + Cr1O3 -> C5Cr1H7N1O6
1005	228.968	10.85	4.88	Putative metabolite	C7H3N1O6S1	1.34	4-Nitrophenyl sulfate C6H5N1O6S1 + C1O1 -> C7H5N1O7S1 - H2O1 -> C7H3N1O6S1
1006	228.968	11.14	4.88	Artifact	C5Cr1H7N1O6	0.19	Pyroglutamic acid C5H7N1O3 + Cr1O3 -> C5Cr1H7N1O6
1007	251.075	11.29	5.54	Artifact	C7H13N3O7	0.2	Peak 3989 C14H24N4O8 / 2 -> C7H12N2O4 + H1N1O3 -> C7H13N3O7
1008	490.332	2.43	5.45	Putative metabolite	C26H50O6S1	0.84	2-Methyl-1-propanethiol C4H10S1 + C6H10O5 -> C10H20O5S1 + C16H30O1 -> C26H50O6S1
1009	335.21	2.68	5.48	Putative metabolite	C19H29N1O4	-0.42	Homocapsaicin C19H29N1O3 + O1 -> C19H29N1O4
1010	335.21	4.2	5.31	Putative metabolite	C19H29N1O4	-0.12	Homocapsaicin C19H29N1O3 + O1 -> C19H29N1O4
1011	122.023	4.21	5.04	Artifact	Ring_artifact_C7H6O2	0.67	Benzoic acid C7H6O2 + Ring_artifact -> Ring_artifact_C7H6O2
1012	133.057	13.4	5.54	Artifact	[13]C1C3H8N2O3	0.35	asparagine C4H8N2O3 + [13]C1C-1 -> [13]C1C3H8N2O3
1013	133.056	11.25	4.35	Artifact	Ring_artifact_C4H7N1O4	0.63	L-Aspartic acid C4H7N1O4 + Ring_artifact -> Ring_artifact_C4H7N1O4
1014	89.0706	13.01	5.02	Artifact	Ring_artifact_C3H7N1O2	1.09	alanine C3H7N1O2 + Ring_artifact -> Ring_artifact_C3H7N1O2
1015	213.023	7.12	5.52	Artifact	C6Cl1H12N1O3S1	0.2	N-Formyl-L-methionine C6H11N1O3S1 + Cl1H1 -> C6Cl1H12N1O3S1
1016	213.023	6.12	4.17	Unknown	Unknown	0.46	Unknown
1017	127.063	7.2	5.57	Metabolite	C6H9N1O2	0.22	D-1-Piperideine-2-carboxylic acid C6H9N1O2
1018	217.926	13.85	5.55	Artifact	C2H4K1Na1O6S1	0.62	KHSO4 H1K1O4S1 + C2H3Na1O2
1019	303.08	13.27	5.47	Putative metabolite	C8H17N1O11	0.2	Lactosamine C12H23N1O10 - C5H8 -> C7H15N1O10 + C1H2O1 -> C8H17N1O11
1020	303.08	11.92	5.55	Artifact	C8H17N1O11	0.2	Peak 4640 C7H15N1O9 + C1H2O2 -> C8H17N1O11
1021	303.08	12.79	5.53	Putative metabolite	C8H17N1O11	0.2	Lactosamine C12H23N1O10 - C5H8 -> C7H15N1O10 + C1H2O1 -> C8H17N1O11
1022	301.087	2.65	5.65	Unknown	Unknown	0.37	Unknown
1023	208.085	8.95	5.57	Metabolite	C10H12N2O3	0.44	L-Kynurenine C10H12N2O3
1024	133.056	7.19	4.65	Artifact	C5H11N1O1S1	0.26	N-Formyl-L-methionine C6H11N1O3S1 - C1O2 -> C5H11N1O1S1
1025	244.187	5.27	5.02	Unknown	Unknown	0.42	Unknown
1026	254.138	11.26	5.52	Metabolite	C11H18N4O3	0.36	Homoanserine C11H18N4O3
1027	255.806	2.47	5.39	Unknown	Unknown	0.41	Unknown
1028	282.004	11.82	5.55	Artifact	C6Cr1H14O9	0.32	Galactitol C6H14O6 + Cr1O3 -> C6Cr1H14O9
1029	282.004	11.36	5.48	Artifact	C6Cr1H14O9	0.32	Galactitol C6H14O6 + Cr1O3 -> C6Cr1H14O9
1030	247.982	13.51	5.48	Artifact	[13]C1C4Cr1H9N1O7	0.66	glutamate C5H9N1O4 + [13]C1C-1 -> [13]C1C4H9N1O4 + Cr1O3 -> [13]C1C4Cr1H9N1O7
1031	375.219	4.22	5.44	Putative metabolite	C17H33N3O4S1	-0.06	Val-Val-Val C15H29N3O4 + C2H4 -> C17H33N3O4 + S1 -> C17H33N3O4S1
1032	345.296	4.1	4.21	Artifact	[13]C1C19H40O4	0.04	10,20-Dihydroxyeicosanoic acid C20H40O4 + [13]C1C-1 -> [13]C1C19H40O4
1033	181.929	13.85	5.51	Artifact	C1H3K1O6S1	0.22	KHSO4 H1K1O4S1 + C1H2O2
1034	204.075	13.72	5.53	Metabolite	C7H12N2O5	0.6	L-beta-aspartyl-L-alanine C7H12N2O5
1035	204.075	11.3	5.34	Metabolite	C7H12N2O5	0.11	L-beta-aspartyl-L-alanine C7H12N2O5
1036	293.024	13.1	5.48	Artifact	C4H15N1O10Si2	-0.18	threonine C4H9N1O3 + H4O4Si1 -> C4H13N1O7Si1 + H2O3Si1 -> C4H15N1O10Si2
1037	264.051	6.41	5.54	Artifact	C9Cl1H13N2O5	0.38	deoxyuridine C9H12N2O5 + Cl1H1 -> C9Cl1H13N2O5
1038	222.089	2.59	5.53	Metabolite	C12H14O4	0.49	Monoisobutyl phthalic acid C12H14O4
1039	315.117	11.29	5.47	Artifact	C10H21N1O10	-0.49	Peak 4479 C9H20O10 + C1H1N1 -> C10H21N1O10
1040	71.4463	2.43	5.49	Unknown	Unknown	1.32	Unknown
1041	255.099	2.49	5.51	Artifact	Ring_artifact_[13]C1C15H30O2	0.41	Hypogeic acid C16H30O2 + [13]C1C-1 -> [13]C1C15H30O2 + Ring_artifact -> Ring_artifact_[13]C1C15H30O2
1042	581.648	13.85	5.4	Artifact	H3K5O16S4	0.91	KHSO4 H1K1O4S1 + H2O4S1 + H-2K2 -> H1K3O8S2 + Peak 136 -> H3K5O16S4
1043	405.79	13.85	5.5	Artifact	H5K3O12S2Si1	-0.03	KHSO4 H1K1O4S1 + H2O4S1 + Peak 3105 -> H5K3O12S2Si1
1044	305.244	2.49	5.35	Artifact	[13]C1C19H32O2	-0.7	Arachidonic acid C20H32O2 + [13]C1C-1 -> [13]C1C19H32O2
1045	143.933	2.82	5.29	Unknown	Unknown	0.6	Unknown
1046	329.066	13.49	5.46	Artifact	C10H16N3Na1O6S1	0.15	glutathione C10H17N3O6S1 + H-1Na1 -> C10H16N3Na1O6S1
1047	315.903	13.86	5.51	Artifact	C4H7K2Na1O8S1	-0.17	KHSO4 H1K1O4S1 + C2H3K1O2 + C2H3Na1O2 -> C4H7K2Na1O8S1
1048	122.178	4.21	5.31	Unknown	Unknown	0.67	Unknown
1049	147.035	7.11	6.08	Artifact	C5H9N1O2S1	-0.01	N-Formyl-L-methionine C6H11N1O3S1 - C1H2O1 -> C5H9N1O2S1
1050	147.036	13.5	5.33	Artifact	Ring_artifact_C5H9N1O4	0.59	glutamate C5H9N1O4 + Ring_artifact -> Ring_artifact_C5H9N1O4
1051	147.035	8.74	5.26	Metabolite	C5H9N1O2S1	0.68	Thiomorpholine 3-carboxylate C5H9N1O2S1
1052	372.324	2.56	5.49	Metabolite	C22H44O4	-0.11	MG(19:0/0:0/0:0) C22H44O4
1053	372.324	3.87	4.51	Metabolite	C22H44O4	-0.11	MG(19:0/0:0/0:0) C22H44O4
1054	216.147	7.16	5.53	Metabolite	C10H20N2O3	0.89	Valyl-Valine C10H20N2O3
1055	216.155	4.2	5.45	Artifact	[13]C1C10H21N1O3	0.92	N-Nonanoylglycine C11H21N1O3 + [13]C1C-1 -> [13]C1C10H21N1O3
1056	216.155	2.81	5.25	Artifact	[13]C1C10H21N1O3	0.45	N-Nonanoylglycine C11H21N1O3 + [13]C1C-1 -> [13]C1C10H21N1O3
1057	161.113	4.22	5.44	Artifact	[13]C1C7H16O3	1.24	7-Hydroxyoctanoic acid C8H16O3 + [13]C1C-1 -> [13]C1C7H16O3
1058	161.113	7.11	4.6	Unknown	Unknown	0.55	Unknown
1059	161.113	3.81	5.44	Unknown	Unknown	0.55	Unknown
1060	185.978	13.51	5.45	Artifact	[53]Cr1C4H7N1O4	0.84	2-Pyrrolidinone C4H7N1O1 + Cr1O3 -> C4Cr1H7N1O4 + [53]Cr1Cr-1 -> [53]Cr1C4H7N1O4
1061	255.898	13.92	5.44	Artifact	[41]K1C3H5K2O6	-0.19	KHCO3 C1H1K1O3 + C2H3K1O2 + H1K1O1 -> C3H5K3O6 + [41]K1K-1 -> [41]K1C3H5K2O6
1062	283.409	2.44	5.83	Artifact	Ring_artifact_[13]C1C17H34O2	0.38	Oleic acid C18H34O2 + [13]C1C-1 -> [13]C1C17H34O2 + Ring_artifact -> Ring_artifact_[13]C1C17H34O2
1063	293.142	13.37	5.52	Artifact	[13]C1C9H20N4O6	0.13	glutamine C5H10N2O3 * 2 -> C10H20N4O6 + [13]C1C-1 -> [13]C1C9H20N4O6
1064	304.152	7.09	4.88	Putative metabolite	C14H24O7	-0.32	2-Octenoic acid C8H14O2 + C6H10O5 -> C14H24O7
1065	304.152	7.44	4.88	Putative metabolite	C14H24O7	-0.32	2-Octenoic acid C8H14O2 + C6H10O5 -> C14H24O7
1066	189.042	6.59	5.53	Metabolite	C10H7N1O3	0.49	Kynurenic acid C10H7N1O3
1067	218.126	14.43	5.53	Metabolite	C9H18N2O4	0.72	Meprobamate C9H18N2O4
1068	218.126	8.89	5.38	Metabolite	C9H18N2O4	0.72	Meprobamate C9H18N2O4
1069	218.126	9.26	5.39	Artifact	C9H18N2O4	0.72	leucine C6H13N1O2 + C1H2O2 -> C7H15N1O4 + C2H3N1 -> C9H18N2O4
1070	329.078	13.01	5.47	Putative metabolite	C10H19N1O9S1	0.46	Distichonic acid A C10H18N2O8 + H2S1 -> C10H20N2O8S1 + H-1N-1O1 -> C10H19N1O9S1
1071	270.099	16.79	5.49	Artifact	C6H18N4O6Si1	0.23	L-Arginine C6H14N4O2 + H4O4Si1 -> C6H18N4O6Si1
1072	89.0597	13	5.57	Artifact	Ring_artifact_C3H7N1O2	1.09	alanine C3H7N1O2 + Ring_artifact -> Ring_artifact_C3H7N1O2
1073	582.373	7.1	5.45	Unknown	Unknown	0.27	Unknown
1074	299.054	2.63	5.23	Putative metabolite	C14H9N3O5	1.41	Cinnavalininate C14H8N2O6 - H-1N-1O1 -> C14H9N3O5
1075	158.069	9.18	4.95	Artifact	C6H10N2O3	1.53	N-Acetylglycine C4H7N1O3 + C2H3N1 -> C6H10N2O3
1076	158.207	13.9	5.36	Unknown	Unknown	0.56	Unknown
1077	496.263	7.1	5.43	Artifact	[13]C1C21H42N1O9P1	-0.05	Peak 391 C22H42N1O9P1 + [13]C1C-1 -> [13]C1C21H42N1O9P1
1078	166.068	7.75	5.51	Artifact	[13]C1C5H7N5O1	1.29	7-Methylguanine C6H7N5O1 + [13]C1C-1 -> [13]C1C5H7N5O1
1079	163.056	13.05	5.51	Artifact	[13]C1C5H10O5	0.48	2-Hydroxyhexanedioic Acid C6H10O5 + [13]C1C-1 -> [13]C1C5H10O5
1080	248.079	2.39	5.45	Metabolite	C12H12N2O4	0.83	5-Hydroxyindoleacetylglycine C12H12N2O4
1081	248.079	3.44	4.27	Metabolite	C12H12N2O4	1.24	5-Hydroxyindoleacetylglycine C12H12N2O4
1082	244.984	13.5	5.47	Artifact	C8H4K1N3O4	0.36	hypoxanthine C5H4N4O1 + C1O1 + C2H3K1O2 -> C8H7K1N4O4 - H3N1 -> C8H4K1N3O4
1083	501.118	13.85	5.52	Artifact	[13]C1C15H29K1O15	0.01	Lactose C12H22O11 + C2H4O2 -> C14H26O13 + [13]C1C-1 -> [13]C1C13H26O13 + C2H3K1O2 -> [13]C1C15H29K1O15
1084	501.118	14.83	3.82	Artifact	[13]C1C15H29K1O15	-0.19	Melibiose C12H22O11 + C2H4O2 -> C14H26O13 + [13]C1C-1 -> [13]C1C13H26O13 + C2H3K1O2 -> [13]C1C15H29K1O15
1085	182.058	12.42	5.54	Metabolite	C9H10O4	0.6	Homovanillic acid C9H10O4
1086	323.098	13.68	5.47	Artifact	[13]C1C9H18N4O6S1	-0.12	Peak 230 C10H18N4O6S1 + [13]C1C-1 -> [13]C1C9H18N4O6S1
1087	117.986	13.31	5.52	Artifact	Ring_artifact_C4H6O4	0.69	Methylmalonic acid C4H6O4 + Ring_artifact -> Ring_artifact_C4H6O4
1088	117.986	13.9	5.07	Artifact	[41]K1C2H5O3	0.81	CH3OH C1H4O1 + C1H1K1O2 + [41]K1K-1 -> [41]K1C2H5O3
1089	308.133	13.61	5.47	Artifact	C10H20N4O7	-0.33	citrulline C6H13N3O3 + Peak 67 -> C10H20N4O7
1090	330.241	8.03	4.89	Metabolite	C18H34O5	-0.23	9,12,13-TriHOME C18H34O5
1091	366.147	2.35	5.5	Metabolite	C22H22O5	0.07	Curcumin II C22H22O5
1092	366.145	11.29	4.73	Artifact	B1C12H23N2O10	-0.34	Lactosamine C12H23N1O10 + H3N1 -> C12H26N2O10 + B1H-3 -> B1C12H23N2O10
1093	237.995	13.53	5.47	Unknown	Unknown	0.42	Unknown
1094	581.659	13.86	5.46	Artifact	C2H4K6O14S3	-0.59	KHSO4 H1K1O4S1 + C2H3K1O2 + Peak 114 -> C2H5K5O14S3 + H-1K1 -> C2H4K6O14S3
1095	579.017	13.9	5.35	Artifact	C15H20K1N5O13P2	-0.02	Cyclic-ADP-ribose C15H21N5O13P2 + H-1K1 -> C15H20K1N5O13P2
1096	388.147	13.7	5.38	Artifact	C12H25K1N6O6	-0.09	citrulline C6H13N3O3 + Peak 1363 -> C12H25K1N6O6
1097	329.265	2.44	5.36	Artifact	[13]C1C18H36O4	0.35	Oleic acid C18H34O2 + [13]C1C-1 -> [13]C1C17H34O2 + C1H2O2 -> [13]C1C18H36O4
1098	522.09	2.56	5.18	Artifact	C16H30O13S2Si1	0.21	Methanethiol C1H4S1 + C3H8O3Si1 - H2O1 -> C4H10O2S1Si1 + Peak 581 -> C16H30O13S2Si1
1099	403.172	13.56	5.45	Artifact	C13H30N3O9P1	0.16	Peak 1816 C11H27N2O9P1 + C2H3N1 -> C13H30N3O9P1
1100	485.679	13.85	5.37	Artifact	[41]K1H1K4O12S3	1.17	KHSO4 H1K1O4S1 + H1K1O4S1 + H1K1O4S1 -> H3K3O12S3 + H-2K2 -> H1K5O12S3 + [41]K1K-1 -> [41]K1H1K4O12S3
1101	223.084	7.46	5.5	Metabolite	C11H13N1O4	0.26	N-Acetyltyrosine C11H13N1O4
1102	259.189	12.99	5.48	Metabolite	C12H25N3O3	0.74	Isoleucyl-Lysine C12H25N3O3
1103	259.189	11.87	4.69	Metabolite	C12H25N3O3	0.74	Isoleucyl-Lysine C12H25N3O3
1104	259.189	13.37	5.48	Metabolite	C12H25N3O3	0.74	Isoleucyl-Lysine C12H25N3O3
1105	262.076	2.7	5.48	Unknown	Unknown	0.4	Unknown
1106	482.171	13.37	5.5	Artifact	C15H28N6Na2O9	0.45	glutamine C5H10N2O3 + Peak 550 -> C10H19N4Na1O6 + Peak 550 -> C15H28N6Na2O9
1107	283.763	2.45	5.42	Unknown	Unknown	0.38	Unknown
1108	134.094	4.35	5.31	Metabolite	C6H14O3	0.7	Polypropylene glycol (m w 1,200-3,000) C6H14O3
1109	556.321	3.07	5.44	Artifact	[13]C1C24H50N1O10P1	-0.2	1-Oleoylglycerophosphoserine C24H46N1O9P1 + C1H4O1 -> C25H50N1O10P1 + [13]C1C-1 -> [13]C1C24H50N1O10P1
1110	188.032	13.07	5.23	Metabolite	C7H8O6	1	cis-2-Methylaconitate C7H8O6
1111	188.032	13.92	5.44	Metabolite	C7H8O6	0.47	cis-2-Methylaconitate C7H8O6
1112	176.105	8.5	5.01	Putative metabolite	C8H16O4	0.9	7-Hydroxyoctanoic acid C8H16O3 + O1 -> C8H16O4
1113	246.121	13.02	5.46	Metabolite	C10H18N2O5	0.7	L-beta-aspartyl-L-leucine C10H18N2O5
1114	246.121	12.65	5.46	Metabolite	C10H18N2O5	0.29	L-beta-aspartyl-L-leucine C10H18N2O5
1115	230.09	13.72	4.76	Metabolite	C9H14N2O5	0.75	Aspartyl-L-proline C9H14N2O5
1116	315.118	13.37	4.43	Artifact	[15]N1C10H19N3Na1O6	-1.38	glutamine C5H10N2O3 + Peak 550 -> C10H19N4Na1O6 + [15]N1N-1 -> [15]N1C10H19N3Na1O6
1117	97.9769	14.21	7.11	Artifact	H3O4P1	0.36	H3PO4 H3O4P1
1118	443.024	14.27	5.45	Metabolite	C10H15N5O11P2	-0.16	GDP C10H15N5O11P2
1119	156.983	13.03	5.47	Artifact	C3Cr1H7N1O3	0.64	threonine C4H9N1O3 + Cr1O3 -> C4Cr1H9N1O6 - C1O2 -> C3Cr1H9N1O4 - H2O1 -> C3Cr1H7N1O3
1120	230.088	13.01	5.45	Artifact	C7H15N2Na1O5	0.72	alanine C3H7N1O2 + Peak 1815 -> C7H15N2Na1O5
1121	613.962	13.85	5.41	Artifact	C12H24K2O19S2	0.71	Lactose C12H22O11 + H1K1O4S1 -> C12H23K1O15S1 + H1K1O4S1 -> C12H24K2O19S2
1122	478.039	13.85	5.36	Artifact	C12H23K1O15S1	0.15	Lactose C12H22O11 + H1K1O4S1 -> C12H23K1O15S1
1123	89.1552	13.03	5.4	Unknown	Unknown	1.09	Unknown
1124	163.048	13.63	5.45	Metabolite	C5H9N1O5	1.06	4-Hydroxy-L-glutamic acid C5H9N1O5
1125	163.047	7.61	4.96	Artifact	[34]S1C6H11N1O2	0.89	trans-S-(1-Propenyl)-L-cysteine C6H11N1O2S1 + [34]S1S-1 -> [34]S1C6H11N1O2
1126	163.049	8.3	4.95	Metabolite	C6H5N5O1	0.67	Pterin C6H5N5O1
1127	163.048	16.28	4.88	Metabolite	C5H9N1O5	1.06	4-Hydroxy-L-glutamic acid C5H9N1O5
1128	174.994	13.02	5.46	Artifact	C3Cr1H9N1O4	0.94	threonine C4H9N1O3 + Cr1O3 -> C4Cr1H9N1O6 - C1O2 -> C3Cr1H9N1O4
1129	354.955	13.89	5.42	Artifact	[13]C1C7H13K3O8	0.05	CH3COOK C2H3K1O2 + C2H4O2 + C2H3K1O2 -> C6H10K2O6 + C2H3K1O2 -> C8H13K3O8 + [13]C1C-1 -> [13]C1C7H13K3O8
1130	154.003	9.73	5.5	Putative metabolite	C3H7O5P1	0.71	Propionic acid C3H6O2 + H1O3P1 -> C3H7O5P1
1131	136.026	13.54	5.5	Artifact	[18]O1C4H6O4	0.51	malate C4H6O5 + [18]O1O-1 -> [18]O1C4H6O4
1132	161.115	7.62	3.94	Artifact	Ring_artifact_C6H11N1O2S1	0.55	trans-S-(1-Propenyl)-L-cysteine C6H11N1O2S1 + Ring_artifact -> Ring_artifact_C6H11N1O2S1
1133	300.156	2.1	5.47	Artifact	[34]S1C16H26O3	-0.79	Peak 109 C16H26O3S1 + [34]S1S-1 -> [34]S1C16H26O3
1134	137.921	13.84	5.44	Artifact	[41]K1H1O4S1	0.58	KHSO4 H1K1O4S1 + [41]K1K-1 -> [41]K1H1O4S1
1135	197.948	13.86	5.45	Artifact	[18]O1C2H5K1O5S1	0.69	KHSO4 H1K1O4S1 + C2H4O2 + [18]O1O-1 -> [18]O1C2H5K1O5S1
1136	187.025	13.86	5.45	Artifact	C5H10K1N1O4	0.48	aspartate C4H7N1O4 + C2H3K1O2 -> C6H10K1N1O6 - C1O2 -> C5H10K1N1O4
1137	187.024	13.01	5.04	Artifact	C5H10K1N1O4	1.01	alanine C3H7N1O2 + C2H3K1O2 -> C5H10K1N1O4
1138	360.132	13.13	4.59	Metabolite	C18H20N2O6	-0.18	Dityrosine C18H20N2O6
1139	360.132	12.54	4.38	Metabolite	C18H20N2O6	-0.45	Dityrosine C18H20N2O6
1140	282.207	2.44	5.71	Artifact	Ring_artifact_C18H34O2	0.38	Oleic acid C18H34O2 + Ring_artifact -> Ring_artifact_C18H34O2
1141	219.094	13.59	5.41	Artifact	[13]C1C7H14N2O5	0.58	Glutamylalanine C8H14N2O5 + [13]C1C-1 -> [13]C1C7H14N2O5
1142	471.769	13.88	5.43	Artifact	C4H5K5O12S1	0.44	KHSO4 H1K1O4S1 + C2H3K1O2 + Peak 392 -> C4H5K5O12S1
1143	412.213	2.67	5.28	Artifact	C20Ca1H36O6	0.92	Octadecanedioic acid C18H34O4 + C2Ca1H2O2 -> C20Ca1H36O6
1144	89.0384	13.02	5.71	Artifact	Ring_artifact_C3H7N1O2	1.09	alanine C3H7N1O2 + Ring_artifact -> Ring_artifact_C3H7N1O2
1145	148.052	4.08	5.13	Metabolite	C9H8O2	0.2	Cinnamic acid C9H8O2
1146	148.052	8.86	5.48	Artifact	C9H8O2	0.2	phenylalanine C9H11N1O2 - H3N1 -> C9H8O2
1147	493.844	13.91	5.41	Artifact	C8H11K5O12	0.17	KHCO3 C1H1K1O3 + C2H3K1O2 + C2H3K1O2 -> C5H7K3O7 + Peak 1704 -> C8H11K5O12
1148	600.138	2.51	5.22	Unknown	Unknown	0.27	Unknown
1149	134.094	13.64	5.44	Artifact	Ring_artifact_C4H6O5	0.63	malate C4H6O5 + Ring_artifact -> Ring_artifact_C4H6O5
1150	312.294	2.41	5.35	Artifact	[13]C2C18H38O2	-0.03	11Z-Eicosenoic acid C20H38O2 + [13]C1C-1 -> [13]C1C19H38O2 + [13]C1C-1 -> [13]C2C18H38O2
1151	150.043	4.2	4.86	Putative metabolite	C7H6N2O2	1.52	(S)-Spinacine C7H9N3O2 - H3N1 -> C7H6N2O2
1152	150.042	13.73	5.49	Unknown	Unknown	0.58	Unknown
1153	231.155	2.6	5.42	Artifact	[13]C1C11H22O4	0.28	Dodecanedioic acid C12H22O4 + [13]C1C-1 -> [13]C1C11H22O4
1154	231.155	3.9	4.48	Unknown	Unknown	0.43	Unknown
1155	369.823	13.84	5.37	Artifact	C2H5K3O10S2	0.63	KHSO4 H1K1O4S1 + C2H3K1O2 + H1K1O4S1 -> C2H5K3O10S2
1156	374.176	2.08	5.4	Artifact	C18H30O6S1	-0.24	N-Undecylbenzenesulfonic acid C17H28O3S1 + C1H2O3 -> C18H30O6S1
1157	245.163	7.1	5.24	Metabolite	C12H23N1O4	0.44	2-Methylbutyroylcarnitine C12H23N1O4
1158	245.162	4.22	5.37	Metabolite	C12H23N1O4	0.85	2-Methylbutyroylcarnitine C12H23N1O4
1159	245.163	2.89	4.81	Metabolite	C12H23N1O4	0.44	2-Methylbutyroylcarnitine C12H23N1O4
1160	289.233	4.22	5.27	Artifact	[13]C1C15H32O4	0.05	(S)-10,16-Dihydroxyhexadecanoic acid C16H32O4 + [13]C1C-1 -> [13]C1C15H32O4
1161	377.081	2.6	5.28	Artifact	C11H23N1O9S2	0.06	Peak 472 C9H16O7S2 + C2H4O2 -> C11H20O9S2 + H3N1 -> C11H23N1O9S2
1162	545.69	13.85	5.41	Artifact	C3H4K6O13S2	2.33	KHSO4 H1K1O4S1 + C2H3K1O2 + Peak 1643 -> C3H5K5O13S2 + H-1K1 -> C3H4K6O13S2
1163	138.045	7.66	3.74	Artifact	[13]C2C3H4N4O1	1.6	hypoxanthine C5H4N4O1 + [13]C1C-1 -> [13]C1C4H4N4O1 + [13]C1C-1 -> [13]C2C3H4N4O1
1164	357.911	13.91	5.36	Artifact	C6H9K3O10	-0.02	CH3COOK C2H3K1O2 + C2H4O2 + C1H1K1O3 -> C5H8K2O7 + C1H1K1O3 -> C6H9K3O10
1165	284.235	2.55	5.44	Artifact	Ring_artifact_[13]C2C16H34O2	0.38	Oleic acid C18H34O2 + [13]C1C-1 -> [13]C1C17H34O2 + [13]C1C-1 -> [13]C2C16H34O2 + Ring_artifact -> Ring_artifact_[13]C2C16H34O2
1166	328.115	7.61	4.56	Artifact	[15]N1C12H17N4O6	-0.55	Adenosine C10H13N5O4 + C2H4O2 -> C12H17N5O6 + [15]N1N-1 -> [15]N1C12H17N4O6
1167	231.059	13	5.44	Artifact	C9H19N1Ni1S1	-0.16	Peak 2431 C9H19N1O1S1 + C2H2Ni1O2 -> C11H21N1Ni1O3S1 - C1O2 -> C10H21N1Ni1O1S1 - C1H2O1 -> C9H19N1Ni1S1
1168	291.942	13.93	5.41	Artifact	C4H10K2O8Si1	-0.32	H4SiO4 H4O4Si1 + C2H3K1O2 + C2H3K1O2 -> C4H10K2O8Si1
1169	308.068	7.6	5.47	Artifact	[13]C1C8H13N3O9	0.11	uridine C9H12N2O6 + H1N1O3 -> C9H13N3O9 + [13]C1C-1 -> [13]C1C8H13N3O9
1170	224.063	14.17	5.45	Artifact	[34]S1C7H14N2O4	0.11	cystathionine C7H14N2O4S1 + [34]S1S-1 -> [34]S1C7H14N2O4
1171	392.205	7.09	4.52	Unknown	Unknown	0.32	Unknown
1172	278.123	13.39	5.44	Artifact	C9H18N4O6	0.48	N-Acetyl-L-arginine C8H16N4O3 + C1H2O3 -> C9H18N4O6
1173	161.975	13.91	5.44	Artifact	[41]K1C3H5O5	1.38	KHCO3 C1H1K1O3 + C2H4O2 + [41]K1K-1 -> [41]K1C3H5O5
1174	153.934	13.85	5.42	Artifact	H3K1O5S1	0.17	KOH H1K1O1 + H2O4S1
1175	281.174	7.09	5.41	Putative metabolite	C14H23N3O3	-0.21	Tyrosyl-Valine C14H20N2O4 + H3N1O-1 -> C14H23N3O3
1176	154.003	13.6	4.78	Artifact	C3H7O5P1	0.71	sn-glycerol-3-phosphate C3H9O6P1 - H2O1 -> C3H7O5P1
1177	220.106	11.29	5.45	Artifact	C8H16N2O5	0.55	N-Acetylornithine C7H14N2O3 + C1H2O2 -> C8H16N2O5
1178	255.155	2.7	5.42	Artifact	[13]C1C13H22O4	0.25	Peak 326 C14H22O4 + [13]C1C-1 -> [13]C1C13H22O4
1179	255.155	4.17	4.93	Artifact	[13]C1C13H22O4	0.25	Peak 327 C14H22O4 + [13]C1C-1 -> [13]C1C13H22O4
1180	234.133	16.77	5.46	Artifact	C8H18N4O4	0.45	L-Arginine C6H14N4O2 + C2H4O2 -> C8H18N4O4
1181	159.051	13.02	5.4	Artifact	C4H10N1Na1O4	0.96	threonine C4H9N1O3 + H1Na1O1 -> C4H10N1Na1O4
1182	233.947	13.53	5.36	Artifact	C4Cr1H6O8	0.75	malate C4H6O5 + Cr1O3 -> C4Cr1H6O8
1183	221.032	7.07	5.42	Putative metabolite	C10H7N1O5	0.1	4-Acetyl-2(3H)-benzoxazolone C9H7N1O3 + C1O2 -> C10H7N1O5
1184	138.027	2.93	5.24	Artifact	[13]C1C6H5O3	0.9	Peak 174 C7H5O3 + [13]C1C-1 -> [13]C1C6H5O3
1185	245.091	13.59	4.81	Artifact	[18]O1C7H18N1O5P1	1.3	Peak 115 C7H18N1O6P1 + [18]O1O-1 -> [18]O1C7H18N1O5P1
1186	245.091	9.07	5.46	Artifact	[13]C1C9H16N2O3S1	0.48	biotin C10H16N2O3S1 + [13]C1C-1 -> [13]C1C9H16N2O3S1
1187	245.091	14.35	4.54	Artifact	[18]O1C7H18N1O5P1	0.9	Phosphorylcholine C5H14N1O4P1 + C2H4O2 -> C7H18N1O6P1 + [18]O1O-1 -> [18]O1C7H18N1O5P1
1188	556.321	7.1	5.26	Artifact	[13]C1C24H50N1O10P1	-0.38	1-Oleoylglycerophosphoserine C24H46N1O9P1 + C1H4O1 -> C25H50N1O10P1 + [13]C1C-1 -> [13]C1C24H50N1O10P1
1189	89.055	13	5.55	Artifact	Ring_artifact_C3H7N1O2	1.09	alanine C3H7N1O2 + Ring_artifact -> Ring_artifact_C3H7N1O2
1190	280.099	4.87	5.46	Putative metabolite	C12H16N4O2S1	0.34	Histidylproline diketopiperazine C12H16N4O2 + S1 -> C12H16N4O2S1
1191	607.294	13.62	5.37	Artifact	C20H46N7O12P1	0.5	citrulline C6H13N3O3 + Peak 226 -> C20H46N7O12P1
1192	121.062	13.01	5.44	Artifact	[18]O1C4H9N1O2	0.73	threonine C4H9N1O3 + [18]O1O-1 -> [18]O1C4H9N1O2
1193	375.219	2.87	4.97	Putative metabolite	C17H33N3O4S1	0.21	Val-Val-Val C15H29N3O4 + C2H4 -> C17H33N3O4 + S1 -> C17H33N3O4S1
1194	294.036	13.01	5.37	Artifact	C8H16N2Ni1O6	-0.07	alanine C3H7N1O2 * 2 -> C6H14N2O4 + C2H2Ni1O2 -> C8H16N2Ni1O6
1195	258.162	2.65	5.28	Artifact	C17H22O2	-0.08	Retinoic Acid C20H28O2 - Library_MS2_fragment -> C17H22O2
1196	258.162	3.8	4.23	Metabolite	C17H22O2	-0.08	Linalyl benzoate C17H22O2
1197	582.356	16.77	5.44	Artifact	C20H46N12O8	0.27	L-Arginine C6H14N4O2 + Peak 454 -> C20H46N12O8
1198	149.06	13.5	5.43	Artifact	[13]C2C3H9N1O4	2.46	glutamate C5H9N1O4 + [13]C1C-1 -> [13]C1C4H9N1O4 + [13]C1C-1 -> [13]C2C3H9N1O4
1199	295.127	11.96	5.45	Putative metabolite	C11H21N1O8	-0.28	L-2-Amino-5-hydroxypentanoic acid C5H11N1O3 + C6H10O5 -> C11H21N1O8
1200	294.925	13.86	5.34	Artifact	[13]C1C3H8K2O8S1	-0.49	CH3COOK C2H3K1O2 + C2H4O2 + [13]C1C-1 -> [13]C1C3H7K1O4 + H1K1O4S1 -> [13]C1C3H8K2O8S1
1201	488.185	13.88	5.15	Putative metabolite	C17H32N2O14	0.11	N-Acetylneuraminic acid C11H19N1O9 + H3N1 -> C11H22N2O9 + C6H10O5 -> C17H32N2O14
1202	259.249	2.47	5.6	Unknown	Unknown	0.4	Unknown
1203	438.257	2.44	5.31	Putative metabolite	C21H43O5P1S1	0.41	LysoPA(0:0/18:1(9Z)) C21H41O7P1 + H2S1 -> C21H43O7P1S1 - C1O2 -> C20H43O5P1S1 - H2O1 -> C20H41O4P1S1 + C1H2O1 -> C21H43O5P1S1
1204	141.09	13.62	5.46	Metabolite	C6H11N3O1	0.79	L-Histidinol C6H11N3O1
1205	177.072	11.96	5.27	Artifact	[13]C1C6H12O5	0.72	2-Isopropylmalic acid C7H12O5 + [13]C1C-1 -> [13]C1C6H12O5
1206	177.072	13.01	5.43	Unknown	Unknown	0.51	Unknown
1207	231.133	14.5	5.39	Metabolite	C8H17N5O3	0.6	Arginyl-Glycine C8H17N5O3
1208	215.064	9.9	5.47	Artifact	C5H13N1O8	0.08	D-Arabitol C5H12O5 + H1N1O3 -> C5H13N1O8
1209	619.605	13.85	5.28	Artifact	H2K6O16S4	0.01	KHSO4 H1K1O4S1 + H1K1O4S1 + H-1K1 -> H1K3O8S2 + Peak 136 -> H3K5O16S4 + H-1K1 -> H2K6O16S4
1210	311.019	13.81	5.39	Artifact	C6H14K1N3O7S1	-0.15	citrulline C6H13N3O3 + H1K1O4S1 -> C6H14K1N3O7S1
1211	114.933	13.02	5.41	Unknown	Unknown	0.71	Unknown
1212	114.933	11.96	4.28	Unknown	Unknown	0.71	Unknown
1213	114.933	13.4	5.48	Unknown	Unknown	0.71	Unknown
1214	213.098	9.82	5.44	Artifact	C8H16N1Na1O4	0.01	isoleucine C6H13N1O2 + C2H3Na1O2 -> C8H16N1Na1O4
1215	213.098	9.34	5.27	Artifact	C8H16N1Na1O4	0.01	leucine C6H13N1O2 + C2H3Na1O2 -> C8H16N1Na1O4
1216	317.092	13.5	5.34	Artifact	Ring_artifact_C10H24N1O8P1	0.36	Glycerophosphocholine C8H20N1O6P1 + C2H4O2 -> C10H24N1O8P1 + Ring_artifact -> Ring_artifact_C10H24N1O8P1
1217	174.072	10.34	4.92	Artifact	[13]C1C6H11N1O4	0.93	N-Acetyl-L-glutamate 5-semialdehyde C7H11N1O4 + [13]C1C-1 -> [13]C1C6H11N1O4
1218	174.072	11.27	5.43	Artifact	[13]C1C6H11N1O4	0.93	N-Acetyl-L-glutamate 5-semialdehyde C7H11N1O4 + [13]C1C-1 -> [13]C1C6H11N1O4
1219	174.072	9.38	4.48	Unknown	Unknown	0.52	Unknown
1220	108.044	1.87	4.81	Putative metabolite	C4H4N4	-0.04	hypoxanthine C5H4N4O1 - C1O1 -> C4H4N4
1221	216.059	13.61	5.39	Artifact	[13]C1C4H14N1O6P1	0.13	Phosphodimethylethanolamine C4H12N1O4P1 + C1H2O2 -> C5H14N1O6P1 + [13]C1C-1 -> [13]C1C4H14N1O6P1
1222	220.069	13.62	5.41	Metabolite	C7H12N2O6	0.62	L-beta-aspartyl-L-serine C7H12N2O6
1223	248.178	2.59	5.27	Metabolite	C16H24O2	0.12	Dimethylbenzyl carbinyl hexanoate C16H24O2
1224	557.324	7.09	5.32	Artifact	C25H51N1O10S1	-0.78	Peak 3399 C24H47N1O9S1 + C1H4O1 -> C25H51N1O10S1
1225	244.231	2.48	5.3	Artifact	[13]C2C13H30O2	-0.04	Pentadecanoic acid C15H30O2 + [13]C1C-1 -> [13]C1C14H30O2 + [13]C1C-1 -> [13]C2C13H30O2
1226	551.885	13.9	5.32	Artifact	C9H17K4O15P1	0.24	CH3COOK C2H3K1O2 + C2H4O2 + Peak 381 -> C9H17K4O15P1
1227	300.104	13.39	5.41	Artifact	C9H17N4Na1O6	0.26	N-Acetyl-L-arginine C8H16N4O3 + C1H1Na1O3 -> C9H17N4Na1O6
1228	283.027	13.91	5.12	Artifact	C7.5H12N1O8.5P1	0.39	UDP-D-glucose C15H24N2O17P2 / 2 -> C7.5H12N1O8.5P1
1229	237.107	16.78	5.42	Artifact	C6H15N5O5	0.5	L-Arginine C6H14N4O2 + H1N1O3 -> C6H15N5O5
1230	276.063	13	5.35	Artifact	C8Ca1H16N2O6	0.46	alanine C3H7N1O2 * 2 -> C6H14N2O4 + C2Ca1H2O2 -> C8Ca1H16N2O6
1231	276.061	11.92	4.53	Unknown	Unknown	0.39	Unknown
1232	716.519	4.23	5.37	Artifact	[13]C1C38H74N1O8P1	-0.2	PE(14:0/20:2(11Z,14Z)) C39H74N1O8P1 + [13]C1C-1 -> [13]C1C38H74N1O8P1
1233	716.519	3.04	5.21	Artifact	[13]C1C38H74N1O8P1	-0.34	PE(14:0/20:2(11Z,14Z)) C39H74N1O8P1 + [13]C1C-1 -> [13]C1C38H74N1O8P1
1234	453.079	2.64	5.19	Artifact	C14Ca1H23N1O13	0.29	Tartaric acid C4H6O6 + Peak 1337 -> C14Ca1H23N1O13
1235	571.284	7.09	5.38	Artifact	[13]C1C24H47O12P1	-0.23	Peak 504 C25H47O12P1 + [13]C1C-1 -> [13]C1C24H47O12P1
1236	432.234	2.07	4.1	Metabolite	C28Cl1H33N2	-0.86	Buclizine C28Cl1H33N2
1237	320.034	13.33	5.4	Artifact	C5H16N2O10Si2	0.46	glutamine C5H10N2O3 + H4O4Si1 -> C5H14N2O7Si1 + H2O3Si1 -> C5H16N2O10Si2
1238	320.035	14.16	4.35	Artifact	C7H16N2O8S2	-0.6	cystathionine C7H14N2O4S1 + H2O4S1 -> C7H16N2O8S2
1239	302.273	2.63	5.42	Artifact	[13]C2C16H36O3	-0.48	(R)-3-Hydroxy-Octadecanoic acid C18H36O3 + [13]C1C-1 -> [13]C1C17H36O3 + [13]C1C-1 -> [13]C2C16H36O3
1240	634.134	14.19	5.39	Artifact	C20H31N6Na1O12S2	-0.3	glutathione disulfide C20H32N6O12S2 + H-1Na1 -> C20H31N6Na1O12S2
1241	146.255	13.39	5.21	Unknown	Unknown	0.59	Unknown
1242	237.181	2.52	5.33	Artifact	[13]C1C14H24O2	-0.49	Capsidiol C15H24O2 + [13]C1C-1 -> [13]C1C14H24O2
1243	367.844	13.86	5.37	Artifact	C2H7K3O10S1Si1	0.11	KHSO4 H1K1O4S1 + C2H3K1O2 + H1K1O1 -> C2H5K3O7S1 + H2O3Si1 -> C2H7K3O10S1Si1
1244	507.753	13.86	5.4	Artifact	[41]K1C4H7K4O12S2	2.06	KHSO4 H1K1O4S1 + C2H4O2 + H-1K1 -> C2H4K2O6S1 + Peak 3105 -> C3H6K4O9S2 + C1H1K1O3 -> C4H7K5O12S2 + [41]K1K-1 -> [41]K1C4H7K4O12S2
1245	576.006	13.85	5.33	Artifact	C12H25K1O19S2	0.96	Lactose C12H22O11 + H2O4S1 -> C12H24O15S1 + H1K1O4S1 -> C12H25K1O19S2
1246	215.046	13.02	5.4	Artifact	C4H13N1O7Si1	0.13	threonine C4H9N1O3 + H4O4Si1 -> C4H13N1O7Si1
1247	303.228	2.47	5.23	Artifact	[13]C1C19H30O2	-0.21	Eicosapentaenoic acid C20H30O2 + [13]C1C-1 -> [13]C1C19H30O2
1248	293.829	13.85	5.38	Artifact	H1K2Na1O8S2	-0.45	KHSO4 H1K1O4S1 + H1K1O4S1 + H-1Na1 -> H1K2Na1O8S2
1249	263.103	2.32	5.29	Unknown	Unknown	0.4	Unknown
1250	263.1	13	4.65	Putative metabolite	C10H17N1O7	0.39	3-Hydroxy-4-butanolide C10H16O8 - H-1N-1O1 -> C10H17N1O7
1251	304.042	13.75	5.3	Artifact	[13]C0.5C8H13.5N1.5O8.5P1	0.2	Uridine diphosphate-N-acetylglucosamine C17H27N3O17P2 / 2 -> C8.5H13.5N1.5O8.5P1 + [13]C0.5C-0.5 -> [13]C0.5C8H13.5N1.5O8.5P1
1252	584.335	16.78	5.42	Artifact	C19H44N12O9	0.04	L-Arginine C6H14N4O2 * 3 -> C18H42N12O6 + C1H2O3 -> C19H44N12O9
1253	381.263	2.43	5.31	Artifact	[13]C1C17H40O6Si1	-0.08	Stearic acid C18H36O2 + [13]C1C-1 -> [13]C1C17H36O2 + H4O4Si1 -> [13]C1C17H40O6Si1
1254	145.981	13.9	5.38	Artifact	[41]K1C3H5O4	0.07	C2H4O2 C2H4O2 + C1H1K1O2 + [41]K1K-1 -> [41]K1C3H5O4
1255	305.199	2.52	5.39	Metabolite	C18H27N1O3	0.31	Capsaicin C18H27N1O3
1256	305.199	3.7	4.42	Metabolite	C18H27N1O3	-0.02	Capsaicin C18H27N1O3
1257	302.123	13.51	5.38	Artifact	C11H18N4O6	0.11	Aspartyl-Histidine C10H14N4O5 + C1H4O1 -> C11H18N4O6
1258	174.354	16.79	5.24	Unknown	Unknown	0.52	Unknown
1259	281.057	13.37	5.38	Artifact	C8H15N1O8Si1	-0.38	malate C4H6O5 + Peak 1050 -> C8H15N1O8Si1
1260	345.047	11.3	5.37	Metabolite	C10H12N5O7P1	0.1	Cyclic GMP C10H12N5O7P1
1261	234.085	13.52	5.31	Metabolite	C8H14N2O6	0.8	L-beta-aspartyl-L-threonine C8H14N2O6
1262	271.215	2.57	5.38	Metabolite	C15H29N1O3	0.53	Tridecanoylglycine C15H29N1O3
1263	271.215	2.96	5.41	Metabolite	C15H29N1O3	0.16	Tridecanoylglycine C15H29N1O3
1264	485.821	13.88	5.32	Artifact	C6H11K5O11S1	0.29	KHSO4 H1K1O4S1 + C2H3K1O2 + Peak 173 -> C7H11K5O13S1 - C1O2 -> C6H11K5O11S1
1265	605.014	13.91	5.38	Artifact	[13]C1C14H23K1N2O17P2	-0.24	UDP-D-glucose C15H24N2O17P2 + H-1K1 -> C15H23K1N2O17P2 + [13]C1C-1 -> [13]C1C14H23K1N2O17P2
1266	388.192	2.08	5.36	Artifact	C19H32O6S1	-0.36	2-Dodecylbenzenesulfonic acid C18H30O3S1 + C1H2O3 -> C19H32O6S1
1267	584.352	3.07	5.35	Artifact	[13]C1C26H54N1O10P1	-0.19	Peak 587 C27H54N1O10P1 + [13]C1C-1 -> [13]C1C26H54N1O10P1
1268	89.0691	13.02	4.57	Artifact	Ring_artifact_C3H7N1O2	1.09	alanine C3H7N1O2 + Ring_artifact -> Ring_artifact_C3H7N1O2
1269	162.072	10.76	5.31	Artifact	[13]C1C5H11N1O4	1	Aminoadipic acid C6H11N1O4 + [13]C1C-1 -> [13]C1C5H11N1O4
1270	257.113	2.47	5.51	Artifact	Ring_artifact_[13]C1C15H32O2	0.4	Palmitic acid C16H32O2 + [13]C1C-1 -> [13]C1C15H32O2 + Ring_artifact -> Ring_artifact_[13]C1C15H32O2
1271	696.447	16.77	5.41	Artifact	C24H56N16O8	-0.28	L-Arginine C6H14N4O2 * 4 -> C24H56N16O8
1272	440.093	13.89	5.32	Artifact	C14H25K1O13	0.28	Lactose C12H22O11 + C2H3K1O2 -> C14H25K1O13
1273	440.093	14.82	5.04	Artifact	C14H25K1O13	0.28	Melibiose C12H22O11 + C2H3K1O2 -> C14H25K1O13
1274	290.131	13.46	5.4	Artifact	[13]C1C10H19N3O6	0.14	Ophthalmic acid C11H19N3O6 + [13]C1C-1 -> [13]C1C10H19N3O6
1275	275.148	14.13	5.42	Metabolite	C11H21N3O5	0.08	Epsilon-(gamma-Glutamyl)-lysine C11H21N3O5
1276	144.097	4.2	5.36	Artifact	Ring_artifact_C8H16O2	0.6	Caprylic acid C8H16O2 + Ring_artifact -> Ring_artifact_C8H16O2
1277	133.053	2.8	5.38	Metabolite	C8H7N1O1	-0.27	Indoxyl C8H7N1O1
1278	132.061	9.04	5.42	Artifact	[13]C1C4H9N1O3	0.74	4-Hydroxyproline C5H9N1O3 + [13]C1C-1 -> [13]C1C4H9N1O3
1279	132.061	12.69	4.11	Artifact	[13]C1C4H9N1O3	0.74	hydroxyproline C5H9N1O3 + [13]C1C-1 -> [13]C1C4H9N1O3
1280	530.288	2.81	5.33	Metabolite	C30H42O8	0.32	Cavipetin A C30H42O8
1281	257.374	2.47	5.47	Artifact	Ring_artifact_[13]C1C15H32O2	0.4	Palmitic acid C16H32O2 + [13]C1C-1 -> [13]C1C15H32O2 + Ring_artifact -> Ring_artifact_[13]C1C15H32O2
1282	239.867	13.93	5.4	Artifact	[41]K1C2H1K2O6	0.22	KHCO3 C1H1K1O3 + C1H2O3 + H-2K2 -> C2H1K3O6 + [41]K1K-1 -> [41]K1C2H1K2O6
1283	197.066	12.24	5.4	Artifact	C7H12N1Na1O4	0.52	N-Carboxyethyl-g-aminobutyric acid C7H13N1O4 + H-1Na1 -> C7H12N1Na1O4
1284	197.066	11.96	5.4	Unknown	Unknown	0.48	Unknown
1285	328.199	2.08	5.36	Artifact	[13]C2C16H30O3S1	-0.68	2-Dodecylbenzenesulfonic acid C18H30O3S1 + [13]C1C-1 -> [13]C1C17H30O3S1 + [13]C1C-1 -> [13]C2C16H30O3S1
1286	464.985	13.98	5.36	Artifact	C10H14K1N5O10P2	0.42	dGDP C10H15N5O10P2 + H-1K1 -> C10H14K1N5O10P2
1287	218.015	11.28	5.39	Artifact	C4H7N2Na1O7	1.81	L-Aspartic acid C4H7N1O4 + N1Na1O3 -> C4H7N2Na1O7
1288	328.094	13.01	5.37	Artifact	C10H20N2O8S1	0.72	Peak 3053 C11H22N2O9S1 - C1H2O1 -> C10H20N2O8S1
1289	144.132	4.2	5.34	Artifact	Ring_artifact_C8H16O2	0.6	Caprylic acid C8H16O2 + Ring_artifact -> Ring_artifact_C8H16O2
1290	147.053	4.1	5.51	Metabolite	C5H9N1O4	0.39	L-Glutamic acid C5H9N1O4
1291	355.069	13.95	5.4	Putative metabolite	C10H17N3O9S1	-0.42	Norophthalmic acid C10H17N3O6 + O3S1 -> C10H17N3O9S1
1292	117.038	11.22	5.36	Artifact	Ring_artifact_C5H11N1O2	0.7	DL-Valine C5H11N1O2 + Ring_artifact -> Ring_artifact_C5H11N1O2
1293	147.053	2.83	5.36	Metabolite	C5H9N1O4	0.39	L-Glutamic acid C5H9N1O4
1294	256.597	2.34	5.28	Unknown	Unknown	0.41	Unknown
1295	377.03	13.97	5.34	Artifact	C10H16K1N3O8S1	-0.22	Peak 3096 C8H14N2O8S1 + C2H3N1 -> C10H17N3O8S1 + H-1K1 -> C10H16K1N3O8S1
1296	164.12	2.63	5.17	Artifact	C11H16O1	0.09	Nootkatol C15H24O1 - Library_MS2_fragment -> C11H16O1
1297	557.333	3.07	5.34	Putative metabolite	C25H52N1O10P1	-0.39	1-Stearoylglycerophosphoserine C24H48N1O9P1 + C1H2O1 -> C25H50N1O10P1 + H2 -> C25H52N1O10P1
1298	701.986	13.92	5.22	Artifact	C15H26K1N2O21P3	3.13	UDP-D-glucose C15H24N2O17P2 + H2K1O4P1 -> C15H26K1N2O21P3
1299	109.029	2.92	5.2	Unknown	Unknown	0.74	Unknown
1300	458.376	2.36	5.35	Metabolite	C30H50O3	-0.23	(20S,24E)-20,26-Dihydroxy-24-dammaren-3-one C30H50O3
1301	524.294	7.09	5.35	Artifact	[13]C1C23H46N1O9P1	0.52	1-Oleoylglycerophosphoserine C24H46N1O9P1 + [13]C1C-1 -> [13]C1C23H46N1O9P1
1302	203.041	13.02	5.37	Artifact	C5H10N1Na1O6	0.4	threonine C4H9N1O3 + C1H1Na1O3 -> C5H10N1Na1O6
1303	498.189	13.88	5.2	Artifact	[13]C1C17H31N3O13	0.09	Peak 397 C18H31N3O13 + [13]C1C-1 -> [13]C1C17H31N3O13
1304	498.189	14.81	4.29	Artifact	[13]C1C17H31N3O13	-0.11	Peak 398 C18H31N3O13 + [13]C1C-1 -> [13]C1C17H31N3O13
1305	411.917	13.9	5.31	Artifact	C6H16K3O9P1S1	-1.01	CH3COOK C2H3K1O2 + Peak 706 -> C6H16K3O9P1S1
1306	136.073	8.07	4.88	Metabolite	C5H12O4	0.43	2-Methylerythritol C5H12O4
1307	136.073	7.51	5.38	Metabolite	C5H12O4	0.43	2-Methylerythritol C5H12O4
1308	418.218	2.06	5.37	Unknown	Unknown	0.31	Unknown
1309	215.16	2.82	5.21	Artifact	[13]C1C11H22O3	0.23	3-Oxododecanoic acid C12H22O3 + [13]C1C-1 -> [13]C1C11H22O3
1310	206.09	11.8	5.4	Metabolite	C7H14N2O5	0.83	Serylthreonine C7H14N2O5
1311	178.084	7.17	5.36	Metabolite	C7H14O5	0.69	2-O-Methyl-L-fucose C7H14O5
1312	240.03	13.47	5.36	Putative metabolite	C7H12O7S1	0.31	2-Methylcitric acid C7H10O7 + H2S1 -> C7H12O7S1
1313	282.167	2.05	5.34	Unknown	Unknown	0.38	Unknown
1314	310.16	2.13	5.34	Putative metabolite	C17H26O3S1	-0.43	N-Undecylbenzenesulfonic acid C17H28O3S1 - H2 -> C17H26O3S1
1315	190.067	13.27	5.38	Artifact	[13]C1C6H11N1O5	0.41	Glutarylglycine C7H11N1O5 + [13]C1C-1 -> [13]C1C6H11N1O5
1316	88.029	1.9	3.98	Unknown	Unknown	1.1	Unknown
1317	148.056	9.99	5.33	Artifact	[13]C1C4H9N1O4	0.76	O-acetyl-L-serine C5H9N1O4 + [13]C1C-1 -> [13]C1C4H9N1O4
1318	148.056	11.25	4.42	Unknown	Unknown	0.58	Unknown
1319	288.086	4.34	5.37	Putative metabolite	C13H12N4O4	0.19	Queuine C12H15N5O3 + C1O1 -> C13H15N5O4 - H3N1 -> C13H12N4O4
1320	273.844	13.85	5.83	Artifact	[41]K1H2K1O8S2	4.17	KHSO4 H1K1O4S1 + H1K1O4S1 + [41]K1K-1 -> [41]K1H2K1O8S2
1321	256.196	2.48	5.3	Artifact	Ring_artifact_C16H32O2	0.41	Palmitic acid C16H32O2 + Ring_artifact -> Ring_artifact_C16H32O2
1322	614.158	14.19	5.33	Artifact	[13]C2C18H32N6O12S2	0.44	glutathione disulfide C20H32N6O12S2 + [13]C1C-1 -> [13]C1C19H32N6O12S2 + [13]C1C-1 -> [13]C2C18H32N6O12S2
1323	301.033	2.95	5.14	Unknown	Unknown	0.37	Unknown
1324	301.033	2.69	5.14	Unknown	Unknown	0.37	Unknown
1325	250.587	2.36	5.36	Unknown	Unknown	0.41	Unknown
1326	257.103	13.58	5.24	Metabolite	C8H20N1O6P1	0.87	Glycerophosphocholine C8H20N1O6P1
1327	819.562	4.38	5.38	Putative metabolite	C43H82N1O11P1	0.18	PS(18:0/18:1(9Z)) C42H80N1O10P1 + C1H2O1 -> C43H82N1O11P1
1328	121.895	4.21	5.31	Unknown	Unknown	0.68	Unknown
1329	192.11	14.19	5.35	Artifact	Ring_artifact_C6H8O7	0.49	citrate/isocitrate C6H8O7 + Ring_artifact -> Ring_artifact_C6H8O7
1330	192.111	16.24	4.19	Artifact	C7H16N2O4	0.56	ornithine C5H12N2O2 + C2H4O2 -> C7H16N2O4
1331	243.072	10.58	5.39	Artifact	C8H14N1Na1O6	0.34	Aminoadipic acid C6H11N1O4 + C2H3Na1O2 -> C8H14N1Na1O6
1332	351.189	13.64	5.31	Artifact	[15]N1C12H26N5O6	-0.52	citrulline C6H13N3O3 * 2 -> C12H26N6O6 + [15]N1N-1 -> [15]N1C12H26N5O6
1333	370.128	11.86	5.36	Artifact	B1C12H23O12	-0.12	Peak 1817 C12H26O12 + B1H-3 -> B1C12H23O12
1334	311.029	13.77	5.29	Artifact	C6H15K1N3O7P1	-0.42	citrulline C6H13N3O3 + H2K1O4P1 -> C6H15K1N3O7P1
1335	91.0542	13.01	5.31	Artifact	[13]C2C1H7N1O2	1.63	alanine C3H7N1O2 + [13]C1C-1 -> [13]C1C2H7N1O2 + [13]C1C-1 -> [13]C2C1H7N1O2
1336	303.062	13.02	5.31	Artifact	C8H17N1O9S1	1	threonine C4H9N1O3 + Peak 3658 -> C8H17N1O9S1
1337	303.062	2.67	5.27	Artifact	C8H17N1O9S1	0.67	2-Hydroxyoctanoic acid C8H16O3 + O3S1 + H1N1O3 -> C8H17N1O9S1
1338	482.433	2.51	5.22	Artifact	C30H58O4	0.23	Stearic acid C18H36O2 + Peak 363 -> C30H58O4
1339	191.943	14.19	5.38	Artifact	Ring_artifact_C6H8O7	0.49	citrate/isocitrate C6H8O7 + Ring_artifact -> Ring_artifact_C6H8O7
1340	191.943	16.35	4.01	Unknown	Unknown	0.49	Unknown
1341	307.178	4.21	5.32	Metabolite	C17H25N1O4	-0.14	Ibopamine C17H25N1O4
1342	233.066	8.81	5.39	Artifact	C10H12N1Na1O4	0.44	phenylalanine C9H11N1O2 + C1H1Na1O2 -> C10H12N1Na1O4
1343	168.027	2.65	5.27	Artifact	C4H12O3S1Si1	1.44	Methanethiol C1H4S1 + C3H8O3Si1
1344	168.027	3.07	5.3	Artifact	C4H12O3S1Si1	2.03	Methanethiol C1H4S1 + C3H8O3Si1
1345	294.158	7.09	5.31	Metabolite	C15H22N2O4	-0.49	Isoleucyl-Tyrosine C15H22N2O4
1346	130.021	7.03	5.29	Artifact	[37]Cl1C3H9O3	-0.22	Glycerol C3H8O3 + Cl1H1 -> C3Cl1H9O3 + [37]Cl1Cl-1 -> [37]Cl1C3H9O3
1347	657.561	13.84	5.26	Artifact	H1K7O16S4	-0.17	KHSO4 H1K1O4S1 + H2O4S1 + H-2K2 -> H1K3O8S2 + Peak 136 -> H3K5O16S4 + H-2K2 -> H1K7O16S4
1348	410.319	2.44	4.87	Metabolite	C28H42O2	-0.53	Gamma-Tocotrienol C28H42O2
1349	390.102	2.56	4.92	Putative metabolite	C13H26O9S2	0.06	R-3-(Methylthio)-1-hexanol C7H16O1S1 + O3S1 -> C7H16O4S2 + C6H10O5 -> C13H26O9S2
1350	374.107	2.6	5.18	Artifact	C13H18N4O9	1.28	Peak 44 C11H14N4O7 + C2H4O2 -> C13H18N4O9
1351	147.061	7.15	5.33	Artifact	[13]C1C5H10O4	0.43	2-Methylglutaric acid C6H10O4 + [13]C1C-1 -> [13]C1C5H10O4
1352	507.895	13.9	5.2	Artifact	C6H17K3O15P2	0.17	CH3COOK C2H3K1O2 + C2H4O2 + Peak 381 -> C7H17K3O17P2 - C1O2 -> C6H17K3O15P2
1353	173.03	13	5.34	Artifact	C4H8N1Na1O5	0.1	alanine C3H7N1O2 + C1H1Na1O3 -> C4H8N1Na1O5
1354	307.178	2.78	5.18	Metabolite	C17H25N1O4	-0.46	Ibopamine C17H25N1O4
1355	378.093	13.88	5.05	Artifact	C12Cl1H23O11	-0.03	Lactose C12H22O11 + Cl1H1 -> C12Cl1H23O11
1356	378.093	14.82	4.63	Artifact	C12Cl1H23O11	-0.03	Melibiose C12H22O11 + Cl1H1 -> C12Cl1H23O11
1357	151.024	10.35	4.53	Artifact	C5H6N1Na1O3	2.24	Pyroglutamic acid C5H7N1O3 + H-1Na1 -> C5H6N1Na1O3
1358	442.079	13.85	5	Artifact	[34]S1C12H24O15	-0.26	Lactose C12H22O11 + H2O4S1 -> C12H24O15S1 + [34]S1S-1 -> [34]S1C12H24O15
1359	143.892	4.2	5.13	Unknown	Unknown	0.6	Unknown
1360	286.072	2.68	5.17	Artifact	C9H18O8S1	-0.91	2-Hydroxyoctanoic acid C8H16O3 + O3S1 + C1H2O2 -> C9H18O8S1
1361	144.978	13.9	5.3	Artifact	C2H4K1N1O4	0.96	Nitrite H1N1O2 + C2H3K1O2
1362	296.914	13.91	5.28	Artifact	[13]C1C4H7K3O7	0.18	KHCO3 C1H1K1O3 + C2H3K1O2 + C2H3K1O2 -> C5H7K3O7 + [13]C1C-1 -> [13]C1C4H7K3O7
1363	213.052	13.74	5.32	Artifact	C6H12K1N3O3	0.34	citrulline C6H13N3O3 + H-1K1 -> C6H12K1N3O3
1364	324.176	2.11	5.33	Putative metabolite	C18H28O3S1	-0.26	2-Dodecylbenzenesulfonic acid C18H30O3S1 - H2 -> C18H28O3S1
1365	236.083	14.29	5.34	Metabolite	C8H16N2O4S1	0.33	Methionyl-Serine C8H16N2O4S1
1366	297.275	2.43	5.2	Artifact	[13]C1C18H36O2	0.62	10Z-Nonadecenoic acid C19H36O2 + [13]C1C-1 -> [13]C1C18H36O2
1367	287.088	13.67	5.3	Artifact	C7H18N3O7P1	0.13	citrulline C6H13N3O3 + Peak 446 -> C7H18N3O7P1
1368	229.168	6.55	5.35	Metabolite	C12H23N1O3	0.41	N-Decanoylglycine C12H23N1O3
1369	229.168	2.75	5.31	Metabolite	C12H23N1O3	0.84	N-Decanoylglycine C12H23N1O3
1370	460.286	2.49	5.13	Putative metabolite	C24H44O6S1	0.56	3-Hydroxysuberic acid C8H14O5 + S1 -> C8H14O5S1 + C16H30O1 -> C24H44O6S1
1371	651.918	13.85	5.24	Artifact	C12H23K3O19S2	0.33	Lactose C12H22O11 + H2O4S1 -> C12H24O15S1 + H1K1O4S1 -> C12H25K1O19S2 + H-2K2 -> C12H23K3O19S2
1372	153.037	9.01	5.36	Artifact	[13]C1C4H4N4O2	1.18	Xanthine C5H4N4O2 + [13]C1C-1 -> [13]C1C4H4N4O2
1373	148.074	7.11	6.48	Metabolite	C6H12O4	-0.28	Mevalonic acid C6H12O4
1374	248.04	13.04	4.35	Artifact	[13]C1C6Ca1H13N1O6	0.54	alanine C3H7N1O2 + C2H4O2 -> C5H11N1O4 + C2Ca1H2O2 -> C7Ca1H13N1O6 + [13]C1C-1 -> [13]C1C6Ca1H13N1O6
1375	223.051	8.79	5.35	Putative metabolite	C7H13N1O5S1	0.19	cystathionine C7H14N2O4S1 + H-1N-1O1 -> C7H13N1O5S1
1376	223.043	13.03	5.33	Artifact	C6H11N1Na2O5	0.28	threonine C4H9N1O3 + C2H3Na1O2 -> C6H12N1Na1O5 + H-1Na1 -> C6H11N1Na2O5
1377	83.9614	2.41	5.21	Artifact	C1H1K1O2	-0.34	HCOOK C1H1K1O2
1378	172.037	10.34	4.77	Putative metabolite	C7H8O5	0.43	N-Acetyl-L-glutamate 5-semialdehyde C7H11N1O4 - H3N1O-1 -> C7H8O5
1379	172.037	11.26	4.44	Putative metabolite	C7H8O5	0.43	N-Acetyl-L-glutamate 5-semialdehyde C7H11N1O4 - H3N1O-1 -> C7H8O5
1380	172.037	10.89	4.42	Putative metabolite	C7H8O5	0.43	N-Acetyl-L-glutamate 5-semialdehyde C7H11N1O4 - H3N1O-1 -> C7H8O5
1381	529.811	13.86	5.32	Artifact	C7H11K5O13S1	0.13	KHSO4 H1K1O4S1 + C2H3K1O2 + Peak 173 -> C7H11K5O13S1
1382	247.153	14.08	5.29	Metabolite	C10H21N3O4	0.43	Lysyl-Threonine C10H21N3O4
1383	247.153	14.34	5.29	Metabolite	C10H21N3O4	0.43	Lysyl-Threonine C10H21N3O4
1384	244.053	7.07	5.36	Putative metabolite	C7H17O5P1S1	0.54	Malaoxon C10H19O7P1S1 - C1O1 -> C9H19O6P1S1 - C2H2O1 -> C7H17O5P1S1
1385	113.962	7.25	5.38	Unknown	Unknown	0.71	Unknown
1386	526.119	2.54	5.16	Artifact	C21H26N4O8S2	0.58	Peak 96 C7H12O6S1 + Peak 862 -> C21H26N4O8S2
1387	403.018	14.18	5.33	Metabolite	C9H15N3O11P2	-0.05	CDP C9H15N3O11P2
1388	320.141	4.23	5.24	Putative metabolite	C13H24N2O5S1	-0.34	Pantetheine C11H22N2O4S1 + C2H2O1 -> C13H24N2O5S1
1389	320.141	3.09	4.3	Putative metabolite	C13H24N2O5S1	-0.34	Pantetheine C11H22N2O4S1 + C2H2O1 -> C13H24N2O5S1
1390	320.14	3.62	4.25	Putative metabolite	C13H24N2O5S1	0.29	Pantetheine C11H22N2O4S1 + C2H2O1 -> C13H24N2O5S1
1391	232.142	4.24	5.17	Metabolite	C10H20N2O4	0.89	Spermic acid 2 C10H20N2O4
1392	232.142	3.01	4.41	Metabolite	C10H20N2O4	0.46	Spermic acid 2 C10H20N2O4
1393	245.207	4.23	5.08	Artifact	[13]C1C13H28O3	0.81	2-Hydroxymyristic acid C14H28O3 + [13]C1C-1 -> [13]C1C13H28O3
1394	256.299	2.48	5.12	Artifact	Ring_artifact_C16H32O2	0.41	Palmitic acid C16H32O2 + Ring_artifact -> Ring_artifact_C16H32O2
1395	120.055	13.02	5.24	Artifact	[15]N1C4H9O3	1.48	threonine C4H9N1O3 + [15]N1N-1 -> [15]N1C4H9O3
1396	299.869	13.93	5.25	Artifact	C3H3K3O9	0.09	KHCO3 C1H1K1O3 + C1H2O3 + H-2K2 -> C2H1K3O6 + C1H2O3 -> C3H3K3O9
1397	333.865	13.84	5.29	Artifact	[41]K1C2H6K1O10S2	1.11	KHSO4 H1K1O4S1 + C2H4O2 + H1K1O4S1 -> C2H6K2O10S2 + [41]K1K-1 -> [41]K1C2H6K1O10S2
1398	140.983	13.9	5.3	Artifact	C1H4N1O5P1	-0.65	Carbamoyl phosphate C1H4N1O5P1
1399	176.032	12.95	5.3	Metabolite	C6H8O6	1.07	Ascorbic acid C6H8O6
1400	176.035	7.17	4.44	Putative metabolite	C9H6N1O3	0.95	Aminochrome o-semiquinone C8H8N1O2 - H2O1 -> C8H6N1O1 + C1O2 -> C9H6N1O3
1401	282.052	14	5.32	Putative metabolite	C8H14N2O7S1	0.25	Cystathionine sulfoxide C7H14N2O5S1 + C1O2 -> C8H14N2O7S1
1402	147.034	13.5	5.37	Artifact	Ring_artifact_C5H9N1O4	0.59	glutamate C5H9N1O4 + Ring_artifact -> Ring_artifact_C5H9N1O4
1403	243.078	7.58	5.24	Artifact	C7H17N1O6S1	0.24	Peak 3834 C5H13N1O4S1 + C2H4O2 -> C7H17N1O6S1
1404	243.077	2.37	5.25	Putative metabolite	C7H17N1O6S1	0.65	Quinic acid C7H12O6 + H3N1 -> C7H15N1O6 + H2S1 -> C7H17N1O6S1
1405	243.077	4.23	5.16	Putative metabolite	C7H17N1O6S1	1.06	Quinic acid C7H12O6 + H3N1 -> C7H15N1O6 + H2S1 -> C7H17N1O6S1
1406	243.077	3.39	4	Putative metabolite	C10Cl1H14N3O2	0.22	chondroitin sulfate E (GalNAc4,6diS-GlcA) proteoglycan C10Cl1H10N3 + H2O1 -> C10Cl1H12N3O1 + H2O1 -> C10Cl1H14N3O2
1407	236.086	17.12	4.5	Unknown	Unknown	0.43	Unknown
1408	236.086	16.69	4.54	Artifact	C6H14N4Na2O3	0.55	L-Arginine C6H14N4O2 + H-1Na1 -> C6H13N4Na1O2 + H1Na1O1 -> C6H14N4Na2O3
1409	397.865	13.91	5.21	Artifact	C5H11K1O9S2Se1	-0.06	taurine C2H7N1O3S1 + H2S1 + H1K1O1 -> C2H10K1N1O4S2 - H3N1 -> C2H7K1O4S2 + Peak 2656 -> C5H11K1O9S2Se1
1410	406.115	13.88	5.06	Artifact	[13]C1C11H23N1O14	0.02	Lactose C12H22O11 + H1N1O3 -> C12H23N1O14 + [13]C1C-1 -> [13]C1C11H23N1O14
1411	406.115	14.82	5.3	Artifact	[13]C1C11H23N1O14	0.02	Melibiose C12H22O11 + H1N1O3 -> C12H23N1O14 + [13]C1C-1 -> [13]C1C11H23N1O14
1412	159.035	4.22	5.24	Putative metabolite	C6H9N1O2S1	1.25	N-Formyl-L-methionine C6H11N1O3S1 - H2O1 -> C6H9N1O2S1
1413	159.035	7.11	4.41	Artifact	C6H9N1O2S1	1.25	N-Formyl-L-methionine C6H11N1O3S1 - H2O1 -> C6H9N1O2S1
1414	159.035	4.86	4.78	Putative metabolite	C6H9N1O2S1	0.62	N-Formyl-L-methionine C6H11N1O3S1 - H2O1 -> C6H9N1O2S1
1415	246.078	11.81	5.34	Artifact	[13]C1C5H15N1O9	0.55	Galactitol C6H14O6 + H1N1O3 -> C6H15N1O9 + [13]C1C-1 -> [13]C1C5H15N1O9
1416	246.078	11.37	5.28	Artifact	[13]C1C5H15N1O9	0.55	Galactitol C6H14O6 + H1N1O3 -> C6H15N1O9 + [13]C1C-1 -> [13]C1C5H15N1O9
1417	177.102	13.63	5.3	Artifact	[13]C2C4H13N3O3	1.7	citrulline C6H13N3O3 + [13]C1C-1 -> [13]C1C5H13N3O3 + [13]C1C-1 -> [13]C2C4H13N3O3
1418	319.084	13.27	5.22	Putative metabolite	C11H17N3O6S1	0.33	N-Ribosylhistidine C11H17N3O6 + S1 -> C11H17N3O6S1
1419	206.072	2.57	5.45	Artifact	Ring_artifact_C14H22O1	0.47	4-(1,1,3,3-Tetramethylbutyl)-phenol C14H22O1 + Ring_artifact -> Ring_artifact_C14H22O1
1420	333.683	2.06	5.22	Unknown	Unknown	0.35	Unknown
1421	317.861	13.85	5.32	Artifact	C3H5K3O8S1	0.42	KHSO4 H1K1O4S1 + C2H3K1O2 + C1H1K1O2 -> C3H5K3O8S1
1422	260.086	13	5.27	Unknown	Unknown	0.4	Unknown
1423	223.043	10.56	4.51	Artifact	C6H11N1Na2O5	0.28	Aminoadipic acid C6H11N1O4 + H-1Na1 -> C6H10N1Na1O4 + H1Na1O1 -> C6H11N1Na2O5
1424	179.051	13.37	5.24	Unknown	Unknown	0.51	Unknown
1425	254.283	2.48	5.16	Artifact	Ring_artifact_C16H30O2	0.41	Hypogeic acid C16H30O2 + Ring_artifact -> Ring_artifact_C16H30O2
1426	248.048	7.15	5.31	Artifact	C6Cl1H17O6Si1	0.37	Glycerol C3H8O3 + Cl1H1 -> C3Cl1H9O3 + C3H8O3Si1 -> C6Cl1H17O6Si1
1427	282.186	2.43	5.48	Artifact	Ring_artifact_C18H34O2	0.38	Oleic acid C18H34O2 + Ring_artifact -> Ring_artifact_C18H34O2
1428	123.032	13.44	5.23	Artifact	C6H5N1O2	0.23	quinolinate C7H5N1O4 - C1O2 -> C6H5N1O2
1429	229.044	13.5	5.3	Artifact	C6H10N2Na1O6	0.24	glutamine C5H10N2O3 + C1H1Na1O3 -> C6H11N2Na1O6 - H1 -> C6H10N2Na1O6
1430	471.787	13.88	5.13	Artifact	[41]K1C5H7K4O11S1	0.76	KHSO4 H1K1O4S1 + C2H3K1O2 + Peak 545 -> C5H7K5O11S1 + [41]K1K-1 -> [41]K1C5H7K4O11S1
1431	116.215	4.26	4.94	Unknown	Unknown	0.7	Unknown
1432	89.0344	13	5.29	Artifact	Ring_artifact_C3H7N1O2	1.09	alanine C3H7N1O2 + Ring_artifact -> Ring_artifact_C3H7N1O2
1433	96.0405	13.42	5.27	Artifact	[13]C1C4H5N1O1	0.19	2-hydroxypyridine C5H5N1O1 + [13]C1C-1 -> [13]C1C4H5N1O1
1434	203.079	7.22	5.3	Metabolite	C8H13N1O5	0.36	N-acetyl-L-2-aminoadipate(2-) C8H13N1O5
1435	88.0418	3.01	4.46	Artifact	Ring_artifact_C3H4O3	1.1	Pyruvic acid C3H4O3 + Ring_artifact -> Ring_artifact_C3H4O3
1436	210.049	13.52	5.23	Artifact	C5H10N2O7	0.48	glutamate C5H9N1O4 + H1N1O3 -> C5H10N2O7
1437	367.835	13.83	5.27	Artifact	H6K2O12S2Si1	-0.52	KHSO4 H1K1O4S1 + H1K1O4S1 + H4O4Si1 -> H6K2O12S2Si1
1438	205.026	13.02	5.28	Unknown	Unknown	0.47	Unknown
1439	282.08	13.01	5.29	Artifact	C8H16N2Na2O6	0.27	threonine C4H9N1O3 + Peak 1815 -> C8H17N2Na1O6 + H-1Na1 -> C8H16N2Na2O6
1440	425.255	7.1	5.18	Artifact	C19H40N1O7P1	-0.85	1-palmitoyl-dihydroxyacetone-phosphate C19H37O7P1 + H3N1 -> C19H40N1O7P1
1441	279.936	13.93	5.33	Artifact	C5H7K2Na1O7	0.22	KHCO3 C1H1K1O3 + C2H3K1O2 + C2H3Na1O2 -> C5H7K2Na1O7
1442	337.844	13.92	5.1	Artifact	[41]K1C4H4K3O8	-0.11	KHCO3 C1H1K1O3 + C2H3K1O2 + C1H1K1O3 -> C4H5K3O8 + H-1K1 -> C4H4K4O8 + [41]K1K-1 -> [41]K1C4H4K3O8
1443	189.144	2.74	5.26	Unknown	Unknown	0.49	Unknown
1444	199.165	2.61	5.3	Artifact	[13]C1C11H22O2	0.17	3-Hydroxydodecanoic acid C12H24O3 - H2O1 -> C12H22O2 + [13]C1C-1 -> [13]C1C11H22O2
1445	199.165	2.18	5.09	Artifact	[13]C1C11H22O2	0.17	5Z-Dodecenoic acid C12H22O2 + [13]C1C-1 -> [13]C1C11H22O2
1446	199.165	3.93	4.22	Unknown	Unknown	0.48	Unknown
1447	148.075	13.38	5.31	Artifact	Ring_artifact_[13]C1C4H9N1O4	0.58	glutamate C5H9N1O4 + [13]C1C-1 -> [13]C1C4H9N1O4 + Ring_artifact -> Ring_artifact_[13]C1C4H9N1O4
1448	101.953	2	5.32	Unknown	Unknown	0.78	Unknown
1449	191.058	8.95	5.32	Artifact	C10H9N1O3	0.23	L-Kynurenine C10H12N2O3 - H3N1 -> C10H9N1O3
1450	118.09	3.02	4.63	Artifact	[13]C2C4H12O2	0.33	4-Methylvaleric acid C6H12O2 + [13]C1C-1 -> [13]C1C5H12O2 + [13]C1C-1 -> [13]C2C4H12O2
1451	118.09	4.23	5.21	Artifact	[13]C2C4H12O2	0.33	Caproic acid C6H12O2 + [13]C1C-1 -> [13]C1C5H12O2 + [13]C1C-1 -> [13]C2C4H12O2
1452	333.085	13.64	5.23	Artifact	C10Ca1H19N3O7	-0.03	citrulline C6H13N3O3 + C2Ca1H2O2 -> C8Ca1H15N3O5 + C2H4O2 -> C10Ca1H19N3O7
1453	453.927	13.88	5.16	Artifact	C8H18K3O10P1S1	-0.33	CH3COOK C2H3K1O2 + Peak 575 -> C8H18K3O10P1S1
1454	158.016	13.91	5.05	Artifact	Ring_artifact_C4H7K1O4	0.56	CH3COOK C2H3K1O2 + C2H4O2 + Ring_artifact -> Ring_artifact_C4H7K1O4
1455	145.883	13.39	5.25	Unknown	Unknown	0.59	Unknown
1456	244.06	2.59	4.93	Unknown	Unknown	0.42	Unknown
1457	172.384	2.66	5.22	Unknown	Unknown	0.52	Unknown
1458	624.497	2.5	5.2	Metabolite	C37H68O7	-0.47	Rollinecin A C37H68O7
1459	217.176	2.62	5.23	Artifact	[13]C1C11H24O3	0.92	3-Hydroxydodecanoic acid C12H24O3 + [13]C1C-1 -> [13]C1C11H24O3
1460	217.176	2.96	5.23	Unknown	Unknown	0.45	Unknown
1461	191.89	13.85	5.16	Artifact	H2K2O5S1	0.56	KOH H1K1O1 + H1K1O4S1
1462	196.944	13.86	5.21	Artifact	C3H5.5K0.5O5S0.5Se0.5	0.31	No edge connections.
1463	262.105	11.29	4.46	Putative metabolite	C11H18O7	0.58	Iso-Valeraldehyde C5H10O1 + C6H8O6 -> C11H18O7
1464	388.283	2.7	5.29	Artifact	C21H40O6	-0.54	Caprylic acid C8H16O2 + Peak 477 -> C21H40O6
1465	422.083	14.39	5.31	Metabolite	C12H23O14P1	-0.37	trehalose-6-Phosphate C12H23O14P1
1466	455.888	13.89	5.2	Artifact	C8H12K4O12	-0.21	CH3COOK C2H3K1O2 + C2H4O2 + Peak 512 -> C8H12K4O12
1467	523.338	16.77	5.27	Artifact	[13]C1C17H42N12O6	-0.23	L-Arginine C6H14N4O2 * 3 -> C18H42N12O6 + [13]C1C-1 -> [13]C1C17H42N12O6
1468	160.946	13.01	4.94	Artifact	[53]Cr1C2H4O5	0.76	CrO3 Cr1O3 + C2H4O2 + [53]Cr1Cr-1 -> [53]Cr1C2H4O5
1469	449.169	2.78	5.19	Artifact	C22H27N1O9	-0.49	Porson C22H26O6 + H1N1O3 -> C22H27N1O9
1470	283.164	15.25	5.31	Metabolite	C12H21N5O3	0.14	Histidinyl-Lysine C12H21N5O3
1471	283.164	14.75	4.95	Metabolite	C12H21N5O3	0.14	Histidinyl-Lysine C12H21N5O3
1472	156.09	4.23	5.1	Putative metabolite	C7H12N2O2	0.5	Dihydrothymine C5H8N2O2 + C2H4 -> C7H12N2O2
1473	144.097	2.83	5.24	Artifact	Ring_artifact_C8H16O2	0.6	Caprylic acid C8H16O2 + Ring_artifact -> Ring_artifact_C8H16O2
1474	314.301	2.53	5.1	Artifact	Ring_artifact_C11H14N4O7	0.36	Peak 44 C11H14N4O7 + Ring_artifact -> Ring_artifact_C11H14N4O7
1475	110.999	8.77	5.29	Artifact	C1H5N1O3S1	0.12	Methanethiol C1H4S1 + H1N1O3
1476	199.121	7.1	5.21	Metabolite	C10H17N1O3	0.22	Ecgonine methyl ester C10H17N1O3
1477	149.077	7.1	5.28	Artifact	[13]C1C5H12O4	0.09	Mevalonic acid C6H12O4 + [13]C1C-1 -> [13]C1C5H12O4
1478	507.999	14.22	5.26	Artifact	[13]C1C9H16N5O13P3	0	ATP C10H16N5O13P3 + [13]C1C-1 -> [13]C1C9H16N5O13P3
1479	120.057	4.14	4.97	Metabolite	C8H8O1	0.96	4-Hydroxystyrene C8H8O1
1480	120.057	2.76	5.32	Artifact	C8H8O1	0.96	Nabumetone C15H16O2 - Library_MS2_fragment -> C8H8O1
1481	120.057	10.76	4.4	Metabolite	C8H8O1	1.79	4-Hydroxystyrene C8H8O1
1482	120.057	8.87	4.02	Artifact	C8H8O1	0.96	phenylalanine C9H11N1O2 - Library_MS2_fragment -> C8H8O1
1483	210.093	2.09	5.3	Metabolite	C8H18O4S1	0.38	2-Ethyl-1-hexanol sulfate C8H18O4S1
1484	89.0578	13.02	5.39	Artifact	Ring_artifact_C3H7N1O2	1.09	alanine C3H7N1O2 + Ring_artifact -> Ring_artifact_C3H7N1O2
1485	230.051	13.38	5.22	Artifact	C6H11N2Na1O6	0.79	glutamine C5H10N2O3 + C1H1Na1O3 -> C6H11N2Na1O6
1486	284.086	10.05	5.27	Artifact	C8H16N2O9	0.28	Peak 2593 C6H12N2O7 + C2H4O2 -> C8H16N2O9
1487	299.888	13.92	5.2	Artifact	[41]K1C4H5K2O8	0.27	KHCO3 C1H1K1O3 + C2H3K1O2 + C1H1K1O3 -> C4H5K3O8 + [41]K1K-1 -> [41]K1C4H5K2O8
1488	220.053	11.81	5.32	Artifact	[37]Cl1C6H15O6	0.3	Galactitol C6H14O6 + Cl1H1 -> C6Cl1H15O6 + [37]Cl1Cl-1 -> [37]Cl1C6H15O6
1489	220.053	11.37	5.23	Artifact	[37]Cl1C6H15O6	0.3	Galactitol C6H14O6 + Cl1H1 -> C6Cl1H15O6 + [37]Cl1Cl-1 -> [37]Cl1C6H15O6
1490	646.041	13.77	5.22	Artifact	[13]C1C16H26K1N3O17P2	-0.15	Uridine diphosphate-N-acetylglucosamine C17H27N3O17P2 + H-1K1 -> C17H26K1N3O17P2 + [13]C1C-1 -> [13]C1C16H26K1N3O17P2
1491	294.493	14.23	5.22	Unknown	Unknown	0.37	Unknown
1492	469.265	14.75	5.29	Unknown	Unknown	0.29	Unknown
1493	319.138	11.3	5.23	Putative metabolite	C12H21N3O7	-0.16	N-(1-Deoxy-1-fructosyl)histidine C12H19N3O7 + H2 -> C12H21N3O7
1494	524.294	3.07	4.61	Artifact	[13]C1C23H46N1O9P1	0.33	1-Oleoylglycerophosphoserine C24H46N1O9P1 + [13]C1C-1 -> [13]C1C23H46N1O9P1
1495	252.155	2.06	5.12	Artifact	[13]C1C13H21N1O3	-0.01	Peak 408 C14H21N1O3 + [13]C1C-1 -> [13]C1C13H21N1O3
1496	262.142	7.09	4.93	Metabolite	C12H22O6	0.53	Phaseolic acid C12H22O6
1497	245.073	7.61	5.3	Artifact	[13]C1C8H12N2O6	0.78	uridine C9H12N2O6 + [13]C1C-1 -> [13]C1C8H12N2O6
1498	412.172	13.57	5.27	Artifact	C16H29K1N4O6	0.28	Peak 2763 C16H30N4O6 + H-1K1 -> C16H29K1N4O6
1499	90.0202	5.01	5.08	Artifact	[18]O1C3H4O2	0.55	Pyruvic acid C3H4O3 + [18]O1O-1 -> [18]O1C3H4O2
1500	148.073	8.74	5.85	Metabolite	C6H12O4	0.4	Mevalonic acid C6H12O4
1501	146.823	13.51	5.06	Unknown	Unknown	0.59	Unknown
1502	601.331	7.1	5.23	Artifact	[13]C1C26H53O12P1	0.03	1-Stearoylglycerophosphoinositol C27H53O12P1 + [13]C1C-1 -> [13]C1C26H53O12P1
1503	282.307	2.44	5.66	Artifact	Ring_artifact_C18H34O2	0.38	Oleic acid C18H34O2 + Ring_artifact -> Ring_artifact_C18H34O2
1504	314.282	2.59	5.23	Artifact	Ring_artifact_C11H14N4O7	0.36	Peak 44 C11H14N4O7 + Ring_artifact -> Ring_artifact_C11H14N4O7
1505	314.282	2.31	5.23	Metabolite	C19H38O3	-0.65	3-hydroxypristanic acid C19H38O3
1506	389.842	13.87	5.24	Artifact	[41]K1C4H8K3O9S1	-0.13	KHSO4 H1K1O4S1 + C2H3K1O2 + C2H3K1O2 -> C4H7K3O8S1 + [41]K1K-1 -> [41]K1C4H7K2O8S1 + H1K1O1 -> [41]K1C4H8K3O9S1
1507	99.0684	7.89	5.13	Metabolite	C5H9N1O1	0.04	2-Piperidinone C5H9N1O1
1508	99.0684	7.16	4.71	Artifact	C5H9N1O1	0.04	Vinylacetylglycine C6H9N1O3 - C1O2 -> C5H9N1O1
1509	99.0684	9.5	4.32	Artifact	C5H9N1O1	-0.26	leucine C6H13N1O2 - Library_MS2_fragment -> C5H9N1O1
1510	194.058	2.27	4.88	Metabolite	C10H10O4	0.56	trans-Ferulic acid C10H10O4
1511	332.053	13.49	5.22	Artifact	C10Ca1H16N2O8	-0.43	L-beta-aspartyl-L-threonine C8H14N2O6 + C2Ca1H2O2 -> C10Ca1H16N2O8
1512	332.051	11.25	4.29	Artifact	C11H17K1O9	0.49	Peak 4432 C10H16O7 + C1H1K1O2 -> C11H17K1O9
1513	147.109	16.92	5.31	Artifact	[13]C1C5H14N2O2	0.56	L-Lysine C6H14N2O2 + [13]C1C-1 -> [13]C1C5H14N2O2
1514	403.33	2.87	5.23	Putative metabolite	C22H45N1O5	-0.07	Mevalonic acid C6H12O4 + H3N1 -> C6H15N1O4 + C16H30O1 -> C22H45N1O5
1515	172.054	13.02	5.25	Artifact	[13]C1C4H10N1Na1O4	0.62	alanine C3H7N1O2 + [13]C1C-1 -> [13]C1C2H7N1O2 + C2H3Na1O2 -> [13]C1C4H10N1Na1O4
1516	548.128	13.96	5.23	Artifact	C16H30N4O13P2	0.66	Citicoline C14H26N4O11P2 + C2H4O2 -> C16H30N4O13P2
1517	387.041	13.52	5.24	Putative metabolite	C10H17N3O9S2	-0.21	glutathione C10H17N3O6S1 + O3S1 -> C10H17N3O9S2
1518	544.265	7.11	5.22	Putative metabolite	C23H45O12P1	0.48	1-tetradecanoyl-sn-glycero-3-phosphate C17H35O7P1 + C6H10O5 -> C23H45O12P1
1519	792.535	4.41	5.26	Artifact	[13]C1C40H78N1O11P1	0	Peak 942 C41H78N1O11P1 + [13]C1C-1 -> [13]C1C40H78N1O11P1
1520	792.535	3.07	5.22	Artifact	[13]C1C40H78N1O11P1	-0.12	PS(16:0/18:2(9Z,12Z)) C40H74N1O10P1 + C1H4O1 -> C41H78N1O11P1 + [13]C1C-1 -> [13]C1C40H78N1O11P1
1521	292.152	2.13	4.9	Unknown	Unknown	0.38	Unknown
1522	292.152	7.1	4.65	Putative metabolite	C13H24O7	-0.33	Phaseolic acid C12H22O6 + C1H2O1 -> C13H24O7
1523	688.488	3.04	5.15	Artifact	[13]C1C36H70N1O8P1	-0.49	PE(14:0/18:2(9Z,12Z)) C37H70N1O8P1 + [13]C1C-1 -> [13]C1C36H70N1O8P1
1524	688.488	4.24	5.14	Artifact	[13]C1C36H70N1O8P1	-0.49	PE(14:0/18:2(9Z,12Z)) C37H70N1O8P1 + [13]C1C-1 -> [13]C1C36H70N1O8P1
1525	303.992	3.07	5.1	Artifact	C6H12O10S1Si1	-0.84	Galacturonic acid C6H10O7 + S1 + H2O3Si1 -> C6H12O10S1Si1
1526	234.085	11.46	4.91	Metabolite	C8H14N2O6	0.37	L-beta-aspartyl-L-threonine C8H14N2O6
1527	273.096	13.5	5.14	Unknown	Unknown	0.39	Unknown
1528	273.096	14.18	4.43	Artifact	C10H15N3O6	0.31	Argininosuccinic acid C10H18N4O6 - H3N1 -> C10H15N3O6
1529	609.086	13.75	5.24	Artifact	[18]O1C17H27N3O16P2	-0.63	Uridine diphosphate-N-acetylglucosamine C17H27N3O17P2 + [18]O1O-1 -> [18]O1C17H27N3O16P2
1530	197.043	14.19	4.99	Putative metabolite	C7H7N3O4	0.79	Furazolidone C8H7N3O5 - C1O1 -> C7H7N3O4
1531	93.0507	7.09	5.24	Artifact	[13]C1C2H8O3	-0.12	Glycerol C3H8O3 + [13]C1C-1 -> [13]C1C2H8O3
1532	282.096	7.27	5.27	Metabolite	C11H14N4O5	0.07	1-Methylinosine C11H14N4O5
1533	282.095	4.9	4	Artifact	[34]S1C12H16N4O2	-0.38	Peak 1190 C12H16N4O2S1 + [34]S1S-1 -> [34]S1C12H16N4O2
1534	469.244	7.1	5.17	Putative metabolite	C20H40N1O9P1	0.15	LysoPE(0:0/14:0) C19H40N1O7P1 + C1O2 -> C20H40N1O9P1
1535	312.945	13.89	5.21	Artifact	[13]C1C5H11K3O7	-0.47	CH3COOK C2H3K1O2 + C2H4O2 + C2H3K1O2 -> C6H10K2O6 + H1K1O1 -> C6H11K3O7 + [13]C1C-1 -> [13]C1C5H11K3O7
1536	257.207	2.63	5.18	Artifact	Ring_artifact_[13]C1C15H32O2	0.4	Palmitic acid C16H32O2 + [13]C1C-1 -> [13]C1C15H32O2 + Ring_artifact -> Ring_artifact_[13]C1C15H32O2
1537	589.841	13.89	5.1	Artifact	C9H16K5O15P1	-0.48	H3PO4 H3O4P1 + Peak 817 -> C9H16K5O15P1
1538	160.048	11.54	5.24	Metabolite	C5H8N2O4	0.67	Tricholomic acid C5H8N2O4
1539	556.134	14.19	5.25	Artifact	C16H33N2O15P1S1	-0.31	cystathionine C7H14N2O4S1 + Peak 840 -> C16H33N2O15P1S1
1540	338.192	2.09	5.2	Unknown	Unknown	0.35	Unknown
1541	431.166	2.78	5.2	Artifact	[13]C1C22H26O8	0.52	Cubebinone C23H26O8 + [13]C1C-1 -> [13]C1C22H26O8
1542	254.267	2.49	5.31	Artifact	Ring_artifact_C16H30O2	0.41	Hypogeic acid C16H30O2 + Ring_artifact -> Ring_artifact_C16H30O2
1543	239.197	2.52	5.03	Artifact	[13]C1C14H26O2	0.15	4-(1,1,3,3-Tetramethylbutyl)-phenol C14H22O1 + [13]C1C-1 -> [13]C1C13H22O1 + C1H4O1 -> [13]C1C14H26O2
1544	539.064	13.85	5.07	Artifact	[13]C1C13H27K1O17S1	0.66	Lactose C12H22O11 + C2H4O2 -> C14H26O13 + [13]C1C-1 -> [13]C1C13H26O13 + H1K1O4S1 -> [13]C1C13H27K1O17S1
1545	374.107	13.69	5.23	Putative metabolite	C13H18N4O9	0.21	5-Acetylamino-6-amino-3-methyluracil C7H10N4O3 + C6H8O6 -> C13H18N4O9
1546	160.981	13.89	5.1	Artifact	[13]C1C2H5K1O5	1.62	KHCO3 C1H1K1O3 + C2H4O2 + [13]C1C-1 -> [13]C1C2H5K1O5
1547	268.204	2.28	5.25	Putative metabolite	C16H28O3	0.17	4-Hydroxy-3-methoxy-2,10-bisaboladien-9-one C16H26O3 + H2 -> C16H28O3
1548	268.204	2.63	5.25	Artifact	C16H28O3	0.17	Capsidiol C15H24O2 + C1H4O1 -> C16H28O3
1549	241.959	13.88	5.19	Artifact	C5H8K2O6	0.01	CH3COOK C2H3K1O2 + C2H4O2 + C1H1K1O2 -> C5H8K2O6
1550	433.822	13.91	5.12	Artifact	C6H7K5O10	0.13	CH3COOK C2H3K1O2 + C2H4O2 + C1H1K1O3 -> C5H8K2O7 + C1H1K1O3 -> C6H9K3O10 + H-2K2 -> C6H7K5O10
1551	523.291	3.07	5.21	Metabolite	C24H46N1O9P1	0.42	1-Oleoylglycerophosphoserine C24H46N1O9P1
1552	115.063	16.81	5.25	Artifact	C5H9N1O2	1.12	ornithine C5H12N2O2 - H3N1 -> C5H9N1O2
1553	171.908	2.68	5.2	Artifact	B1H1O5Se1	1.31	Selenate H2O4Se1 + B1H-1O1
1554	107.021	13.39	5.08	Unknown	Unknown	0.75	Unknown
1555	134.006	13.56	4.26	Artifact	Ring_artifact_C4H6O5	0.63	malate C4H6O5 + Ring_artifact -> Ring_artifact_C4H6O5
1556	337.177	7.09	5.16	Unknown	Unknown	0.35	Unknown
1557	135.068	2.86	5.09	Metabolite	C8H9N1O1	0.1	N-Acetylarylamine C8H9N1O1
1558	328.24	2.38	5.18	Metabolite	C22H32O2	0.09	Docosahexaenoic acid C22H32O2
1559	583.656	13.87	5.14	Artifact	[41]K1C2H4K5O14S3	0.48	KHSO4 H1K1O4S1 + H1K1O4S1 + H1K1O4S1 -> H3K3O12S3 + H-2K2 -> H1K5O12S3 + C2H3K1O2 -> C2H4K6O14S3 + [41]K1K-1 -> [41]K1C2H4K5O14S3
1560	118.076	11.21	5.25	Artifact	[15]N1C5H11O2	0.11	DL-Valine C5H11N1O2 + [15]N1N-1 -> [15]N1C5H11O2
1561	409.248	16.76	5.18	Artifact	[13]C1C13H32N8O6	-0.16	L-Arginine C6H14N4O2 + Peak 1180 -> C14H32N8O6 + [13]C1C-1 -> [13]C1C13H32N8O6
1562	433.831	13.87	5.2	Artifact	[41]K1C5H8K3O11S1	0.87	KHSO4 H1K1O4S1 + C2H3K1O2 + Peak 1704 -> C5H8K4O11S1 + [41]K1K-1 -> [41]K1C5H8K3O11S1
1563	430.858	13.87	5.1	Artifact	[13]C1C5H10K4O10S1	0.12	KHSO4 H1K1O4S1 + C2H3K1O2 + C2H3K1O2 -> C4H7K3O8S1 + C2H3K1O2 -> C6H10K4O10S1 + [13]C1C-1 -> [13]C1C5H10K4O10S1
1564	462.189	2.93	5.24	Metabolite	C24H30O9	-0.25	13-Hydroxy-5'-O-methylmelledonal C24H30O9
1565	375.052	2.67	4.97	Unknown	Unknown	0.33	Unknown
1566	599.315	7.09	5.2	Artifact	[13]C1C26H51O12P1	-0.05	1-Oleoylglycerophosphoinositol C27H51O12P1 + [13]C1C-1 -> [13]C1C26H51O12P1
1567	89.0322	13	5.18	Artifact	Ring_artifact_C3H7N1O2	1.09	alanine C3H7N1O2 + Ring_artifact -> Ring_artifact_C3H7N1O2
1568	198.029	13.58	5.2	Putative metabolite	C5H11O6P1	0.63	Glycerylphosphorylethanolamine C5H14N1O6P1 - H3N1 -> C5H11O6P1
1569	275.067	7.24	4.79	Putative metabolite	C7H17N1O8S1	0.68	N-Methyl-1-deoxynojirimycin C7H15N1O4 + O3S1 -> C7H15N1O7S1 + H2O1 -> C7H17N1O8S1
1570	275.068	11.2	5.26	Artifact	C9Ca1H17N1O6	-0.08	DL-Valine C5H11N1O2 + C2H4O2 -> C7H15N1O4 + C2Ca1H2O2 -> C9Ca1H17N1O6
1571	193.067	12.09	4.52	Artifact	[13]C1C6H12O6	0.22	N-acetyl-glutamate C7H12O6 + [13]C1C-1 -> [13]C1C6H12O6
1572	193.067	13.02	5.16	Artifact	[13]C1C6H12O6	0.22	2-Methylsuccinic acid C5H8O4 + C2H4O2 -> C7H12O6 + [13]C1C-1 -> [13]C1C6H12O6
1573	350.213	2.09	6.28	Unknown	Unknown	0.34	Unknown
1574	212.12	2.64	5.18	Metabolite	C15H16O1	0.54	11,12-Dihydrolactaroviolin C15H16O1
1575	147.098	4.22	5.18	Unknown	Unknown	0.59	Unknown
1576	147.098	2.88	4.61	Unknown	Unknown	0.59	Unknown
1577	493.862	13.89	5.16	Artifact	[41]K1C7H13K3O13P1	0.05	KHCO3 C1H1K1O3 + C2H4O2 + H2K1O4P1 -> C3H7K2O9P1 + C2H3K1O2 -> C5H10K3O11P1 + C2H3K1O2 -> C7H13K4O13P1 + [41]K1K-1 -> [41]K1C7H13K3O13P1
1578	310.164	2.83	5.13	Putative metabolite	C14H30O3S2	0.12	2-Hydroxymyristic acid C14H28O3 + S1 -> C14H28O3S1 + H2S1 -> C14H30O3S2
1579	88.8825	13.01	5.12	Unknown	Unknown	1.09	Unknown
1580	259.952	13.9	5.18	Artifact	[41]K1C5H8K1O7	0.91	KHCO3 C1H1K1O3 + C2H4O2 + C2H3K1O2 -> C5H8K2O7 + [41]K1K-1 -> [41]K1C5H8K1O7
1581	357.93	13.89	5.15	Artifact	[41]K1C7H11K2O9	-0.15	KHCO3 C1H1K1O3 + C2H4O2 + C2H3K1O2 -> C5H8K2O7 + C2H3K1O2 -> C7H11K3O9 + [41]K1K-1 -> [41]K1C7H11K2O9
1582	176.112	16.78	5.17	Artifact	[13]C1[15]N1C5H14N3O2	0.94	L-Arginine C6H14N4O2 + [13]C1C-1 -> [13]C1C5H14N4O2 + [15]N1N-1 -> [13]C1[15]N1C5H14N3O2
1583	789.552	4.42	5.23	Metabolite	C42H80N1O10P1	-0.27	PS(18:0/18:1(9Z)) C42H80N1O10P1
1584	789.552	3.08	5.15	Metabolite	C42H80N1O10P1	-0.4	PS(18:0/18:1(9Z)) C42H80N1O10P1
1585	429.332	2.75	5.17	Artifact	[13]C1C27H44O3	0.23	Ercalcitriol C28H44O3 + [13]C1C-1 -> [13]C1C27H44O3
1586	331.048	13.01	4.83	Artifact	B1C7H15N1O11P1	0.23	Peak 2764 C7H18N1O11P1 + B1H-3 -> B1C7H15N1O11P1
1587	331.048	11.26	5.23	Artifact	C9Cr1H17N3O7	-1.03	Asparaginyl-Valine C9H17N3O4 + Cr1O3 -> C9Cr1H17N3O7
1588	606.081	14.12	5.21	Artifact	[13]C1C15H25N5O16P2	-0.32	Guanosine diphosphate mannose C16H25N5O16P2 + [13]C1C-1 -> [13]C1C15H25N5O16P2
1589	245.171	2.63	5.13	Artifact	[13]C1C12H24O4	0.47	1,11-Undecanedicarboxylic acid C13H24O4 + [13]C1C-1 -> [13]C1C12H24O4
1590	245.171	4.08	4.29	Artifact	[13]C1C12H24O4	0.47	1,11-Undecanedicarboxylic acid C13H24O4 + [13]C1C-1 -> [13]C1C12H24O4
1591	211.033	4.96	5.23	Artifact	C5H9N1O8	0.55	L-2-Hydroxyglutaric acid C5H8O5 + H1N1O3 -> C5H9N1O8
1592	436.259	7.1	5.24	Metabolite	C21H41O7P1	-0.02	LysoPA(0:0/18:1(9Z)) C21H41O7P1
1593	221.105	2.93	4.59	Artifact	C12H15N1O3	0.42	Indole-3-ethanol C10H11N1O1 + C2H4O2 -> C12H15N1O3
1594	296.141	2.53	5.07	Metabolite	C19H20O3	0.49	5-[(4-Hydroxypheny)ethenyl]-2-(3-methyl-1-butenyl)-1,3-benzenediol C19H20O3
1595	193.06	9.27	5.25	Putative metabolite	C7H7N5O2	0.39	7-Methylguanine C6H7N5O1 + C1O1 -> C7H7N5O2
1596	206.079	12.97	5.18	Metabolite	C8H14O6	0.67	Diethyl tartrate C8H14O6
1597	232.963	13.56	5.18	Artifact	C4Cr1H7N1O7	0.68	aspartate C4H7N1O4 + Cr1O3 -> C4Cr1H7N1O7
1598	118.926	13.02	5.14	Unknown	Unknown	0.69	Unknown
1599	118.926	13.4	5.15	Unknown	Unknown	0.69	Unknown
1600	455.907	13.9	5.16	Artifact	[41]K1C9H14K3O11	-0.09	KHCO3 C1H1K1O3 + C2H4O2 - C1O2 -> C2H5K1O3 - H2O1 -> C2H3K1O2 + Peak 605 -> C9H14K4O11 + [41]K1K-1 -> [41]K1C9H14K3O11
1601	404.563	13.51	5.19	Artifact	C11.5H19N3.5O8.5P1.5S0.5	0.21	acetyl-CoA C23H38N7O17P3S1 / 2 -> C11.5H19N3.5O8.5P1.5S0.5
1602	518.36	2.66	5.11	Putative metabolite	C31H50O6	0.65	Pitheduloside I C30H48O5 + C1H2O1 -> C31H50O6
1603	300.216	7.9	5.25	Putative metabolite	C14H28N4O3	0.14	Isoleucyl-Lysine C12H25N3O3 + C2H2O1 -> C14H27N3O4 - H-1N-1O1 -> C14H28N4O3
1604	145.037	7.51	5.17	Metabolite	C5H7N1O4	0.74	2-Keto-glutaramic acid C5H7N1O4
1605	166.115	2.84	5.04	Artifact	Ring_artifact_C5H10O6	0.54	Arabinonic acid C5H10O6 + Ring_artifact -> Ring_artifact_C5H10O6
1606	234.085	9.47	5.25	Metabolite	C8H14N2O6	0.37	L-beta-aspartyl-L-threonine C8H14N2O6
1607	498.279	7.09	5.22	Artifact	[13]C1C21H44N1O9P1	-0.15	LysoPE(0:0/16:1(9Z)) C21H42N1O7P1 + C1H2O2 -> C22H44N1O9P1 + [13]C1C-1 -> [13]C1C21H44N1O9P1
1608	150.053	11.28	5.24	Metabolite	C5H10O5	0.82	D-Xylose C5H10O5
1609	182.983	13.51	5.1	Artifact	Ring_artifact_C7H5N1O5	0.5	quinolinate C7H5N1O4 + O1 + Ring_artifact -> Ring_artifact_C7H5N1O5
1610	239.072	13.07	5.17	Artifact	[13]C1C7H14O8	0.09	3,4,5-trihydroxy-6-(2-hydroxyethoxy)oxane-2-carboxylic acid C8H14O8 + [13]C1C-1 -> [13]C1C7H14O8
1611	361.992	13.92	5.1	Artifact	C9H12K1N2O9P1	-0.42	UMP C9H13N2O9P1 + H-1K1 -> C9H12K1N2O9P1
1612	568.06	13.93	5.14	Artifact	[18]O1C15H24N2O16P2	-0.76	UDP-D-glucose C15H24N2O17P2 + [18]O1O-1 -> [18]O1C15H24N2O16P2
1613	499.178	2.35	5.2	Artifact	[13]C1C23H34O7S2	-0.3	Peak 73 C12H18O1S2 + Peak 540 -> C24H34O7S2 + [13]C1C-1 -> [13]C1C23H34O7S2
1614	499.178	3.36	4	Artifact	[13]C1C22H30O12	-1.84	Eucaglobulin C23H30O12 + [13]C1C-1 -> [13]C1C22H30O12
1615	158.02	7.66	5.28	Artifact	C5H3N4Na1O1	1.62	hypoxanthine C5H4N4O1 + H-1Na1 -> C5H3N4Na1O1
1616	158.019	8.88	4.62	Putative metabolite	C10H6S1	0.77	{[(2E)-1-(4-methoxyphenyl)-3-phenylprop-2-en-1-yl]oxy}sulfonic acid C16H16O5S1 - C6H10O5 -> C10H6S1
1617	234.904	13.84	5.19	Artifact	[13]C1C1H4K2O6S1	0.12	KHSO4 H1K1O4S1 + C2H3K1O2 + [13]C1C-1 -> [13]C1C1H4K2O6S1
1618	137.919	13.84	5.15	Artifact	[34]S1H1K1O4	0.42	KHSO4 H1K1O4S1 + [34]S1S-1 -> [34]S1H1K1O4
1619	429.332	4.23	5.04	Artifact	[13]C1C27H44O3	0.23	Ercalcitriol C28H44O3 + [13]C1C-1 -> [13]C1C27H44O3
1620	89.0611	13.02	5.22	Artifact	Ring_artifact_C3H7N1O2	1.09	alanine C3H7N1O2 + Ring_artifact -> Ring_artifact_C3H7N1O2
1621	174.108	7.09	5.13	Artifact	[13]C1C7H15N1O3	0.85	N-Acetyl-L-leucine C8H15N1O3 + [13]C1C-1 -> [13]C1C7H15N1O3
1622	263.077	10.75	5.23	Artifact	C11H14N1Na1O5	0.64	tyrosine C9H11N1O3 + C2H3Na1O2 -> C11H14N1Na1O5
1623	248.977	13.5	5.18	Unknown	Unknown	0.41	Unknown
1624	276.005	11.3	5.17	Artifact	C6Cr1H12N2O7	-0.15	L-2-Amino-4-methylenepentanedioic acid C6H9N1O4 + H3N1 -> C6H12N2O4 + Cr1O3 -> C6Cr1H12N2O7
1625	307.079	14.19	5.19	Artifact	[18]O0.5C10H16N3O5.5S1	-1.94	glutathione disulfide C20H32N6O12S2 / 2 -> C10H16N3O6S1 + [18]O0.5O-0.5 -> [18]O0.5C10H16N3O5.5S1
1626	119.083	11.23	5.22	Artifact	[18]O1C5H11N1O1	0.2	DL-Valine C5H11N1O2 + [18]O1O-1 -> [18]O1C5H11N1O1
1627	228.078	16.24	5.22	Artifact	C5H16N2O6Si1	-0.16	ornithine C5H12N2O2 + H4O4Si1 -> C5H16N2O6Si1
1628	205.139	4.21	5.11	Artifact	[13]C1C9H20O4	1.04	Caprylic acid C8H16O2 + [13]C1C-1 -> [13]C1C7H16O2 + C2H4O2 -> [13]C1C9H20O4
1629	205.139	2.83	4.99	Artifact	[13]C1C9H20O4	0.56	(2xi,6xi)-7-Methyl-3-methylene-1,2,6,7-octanetetrol C10H20O4 + [13]C1C-1 -> [13]C1C9H20O4
1630	134.07	13.54	5.26	Artifact	Ring_artifact_C4H6O5	0.63	malate C4H6O5 + Ring_artifact -> Ring_artifact_C4H6O5
1631	315.216	7.1	5.08	Metabolite	C15H29N3O4	-0.3	Val-Val-Val C15H29N3O4
1632	428.033	14.01	5.2	Artifact	[13]C1C9H15N5O10P2	0.16	dGDP C10H15N5O10P2 + [13]C1C-1 -> [13]C1C9H15N5O10P2
1633	97.9938	13.84	4.71	Artifact	Ring_artifact_C2H3K1O2	1	CH3COOK C2H3K1O2 + Ring_artifact -> Ring_artifact_C2H3K1O2
1634	215.963	13.91	5.09	Artifact	[41]K1C4H8K1O5	0.03	CH3COOK C2H3K1O2 + C2H4O2 + [41]K1K-1 -> [41]K1C4H7O4 + H1K1O1 -> [41]K1C4H8K1O5
1635	321.165	13.63	5.22	Artifact	C11H23N5O6	0.42	Peak 3775 C9H20N4O6 + C2H3N1 -> C11H23N5O6
1636	299.067	13.01	5.12	Artifact	C9H17N1O8S1	0.96	Peak 1070 C10H19N1O9S1 - C1H2O1 -> C9H17N1O8S1
1637	277.135	14.01	5.17	Artifact	[13]C1C10H20N2O6	0.33	Saccharopine C11H20N2O6 + [13]C1C-1 -> [13]C1C10H20N2O6
1638	538.07	13.88	5.08	Artifact	C14H28K1O17P1	-0.15	Lactose C12H22O11 + C2H4O2 -> C14H26O13 + H2K1O4P1 -> C14H28K1O17P1
1639	143.892	2.82	5.09	Unknown	Unknown	0.6	Unknown
1640	543.703	13.86	5.11	Artifact	C2H5K5O14S3	0.14	KHSO4 H1K1O4S1 + H2O4S1 + H-2K2 -> H1K3O8S2 + C2H3K1O2 -> C2H4K4O10S2 + H1K1O4S1 -> C2H5K5O14S3
1641	71.9533	6.76	5.2	Artifact	Cl2H2	0.49	HCl Cl1H1 + Cl1H1
1642	98.0688	13.87	5.61	Unknown	Unknown	1	Unknown
1643	273.836	13.86	5.18	Artifact	C1H1K3O7S1	-0.3	KHCO3 C1H1K1O3 + H2O4S1 + H-2K2 -> C1H1K3O7S1
1644	350.061	14.26	5.22	Artifact	C11H19K1O10	0.37	Galactose-beta-1,4-xylose C11H20O10 + H-1K1 -> C11H19K1O10
1645	237.072	13.51	4.85	Unknown	Unknown	0.43	Unknown
1646	484.159	2.37	5.14	Metabolite	C22H28O12	-1.7	7-Methyl-1,4,5-naphthalenetriol 4-[xylosyl-(1->6)-glucoside] C22H28O12
1647	484.159	3.35	4	Putative metabolite	C26Cl1H29N2O3S1	-0.12	Buclizine C28Cl1H33N2 + O3S1 -> C28Cl1H33N2O3S1 - C2H4 -> C26Cl1H29N2O3S1
1648	144.095	4.21	5.11	Artifact	Ring_artifact_C8H16O2	0.6	Caprylic acid C8H16O2 + Ring_artifact -> Ring_artifact_C8H16O2
1649	673.994	13.85	5.09	Artifact	C14H29K2O21P1S1	-0.33	Lactose C12H22O11 + C2H4O2 -> C14H26O13 + H1K1O4S1 -> C14H27K1O17S1 + H2K1O4P1 -> C14H29K2O21P1S1
1650	144.338	4.2	5.07	Unknown	Unknown	0.6	Unknown
1651	75.998	2.58	5.06	Unknown	Unknown	1.25	Unknown
1652	144.098	4.21	5.27	Artifact	Ring_artifact_C8H16O2	0.6	Caprylic acid C8H16O2 + Ring_artifact -> Ring_artifact_C8H16O2
1653	198.05	7.47	5.28	Metabolite	C13H10S1	1.12	4-Methyldibenzothiophene C13H10S1
1654	267.095	14.2	5.16	Metabolite	C9H17N1O8	0.44	Neuraminic acid C9H17N1O8
1655	531.29	7.09	5.1	Unknown	Unknown	0.28	Unknown
1656	257.163	2.89	4.89	Metabolite	C13H23N1O4	0.03	2-Hexenoylcarnitine C13H23N1O4
1657	329.301	2.54	5.19	Artifact	[13]C1C19H40O3	0.3	Polyoxyethylene 40 monostearate C20H40O3 + [13]C1C-1 -> [13]C1C19H40O3
1658	329.301	3.92	3.94	Unknown	Unknown	0.35	Unknown
1659	320.044	14.18	5.18	Artifact	C9H17K1N2O6S1	0.12	cystathionine C7H14N2O4S1 + C2H3K1O2 -> C9H17K1N2O6S1
1660	495.26	3.07	5.14	Putative metabolite	C22H42N1O9P1	0.04	LysoPE(0:0/16:1(9Z)) C21H42N1O7P1 + C1O2 -> C22H42N1O9P1
1661	295.968	13.89	5.16	Artifact	C6H11K2Na1O7	0.21	CH3COOK C2H3K1O2 + C2H4O2 + C2H3K1O2 -> C6H10K2O6 + H1Na1O1 -> C6H11K2Na1O7
1662	201.081	13.01	5.14	Artifact	[13]C1C5H13N2Na1O4	0.28	alanine C3H7N1O2 * 2 -> C6H14N2O4 + H-1Na1 -> C6H13N2Na1O4 + [13]C1C-1 -> [13]C1C5H13N2Na1O4
1663	337.825	13.93	5.15	Artifact	C3H2K4O9	-0.56	KHCO3 C1H1K1O3 + C1H2O3 + H-2K2 -> C2H1K3O6 + C1H1K1O3 -> C3H2K4O9
1664	320.108	13.56	5.13	Artifact	C9H24N2O6S2	-0.07	Peak 1821 C8H20N2O5S2 + C1H4O1 -> C9H24N2O6S2
1665	353.875	13.92	5.01	Artifact	[41]K1C5H8K3O8	0.18	KHCO3 C1H1K1O3 + C2H3K1O2 + C2H3K1O2 -> C5H7K3O7 + [41]K1K-1 -> [41]K1C5H7K2O7 + H1K1O1 -> [41]K1C5H8K3O8
1666	652.528	2.52	5.17	Putative metabolite	C39H72O7	-0.3	Rollinecin A C37H68O7 + C2H4 -> C39H72O7
1667	93.0327	7.66	5.24	Artifact	C4H3N3	0.08	adenine C5H5N5 - Library_MS2_fragment -> C4H3N3
1668	306.106	7.85	5.23	Artifact	C11H18N2O8	0.05	5,6-Dihydrouridine C9H14N2O6 + C2H4O2 -> C11H18N2O8
1669	306.106	13	3.95	Artifact	C11H18N2O8	0.38	Peak 2422 C11H17N1O5 + H1N1O3 -> C11H18N2O8
1670	442.089	13.86	4.87	Artifact	[18]O1C12H24O14S1	-2.63	Lactose C12H22O11 + H2O4S1 -> C12H24O15S1 + [18]O1O-1 -> [18]O1C12H24O14S1
1671	274.08	12.98	4.63	Artifact	C10H14N2O7	0	alanine C3H7N1O2 + Peak 539 -> C10H14N2O7
1672	274.08	12.4	3.6	Putative metabolite	C10H14N2O7	0	uridine C9H12N2O6 + C1H2O1 -> C10H14N2O7
1673	272.162	4.23	5.11	Artifact	C14H24O5	-0.1	Linalyl propionate C13H22O2 + C1H2O3 -> C14H24O5
1674	134.077	11.3	5.19	Artifact	[13]C1C4H11N1O3	0.36	L-2-Amino-5-hydroxypentanoic acid C5H11N1O3 + [13]C1C-1 -> [13]C1C4H11N1O3
1675	605.713	13.87	5.12	Artifact	C5H8K6O15S2	0.17	KHSO4 H1K1O4S1 + C2H4O2 + Peak 738 -> C5H8K6O15S2
1676	445.031	13.84	5.04	Artifact	C10H16N5O11P1S1	-0.31	dGMP C10H14N5O7P1 + H2O4S1 -> C10H16N5O11P1S1
1677	243.155	2.18	5.2	Artifact	[13]C1C12H22O4	-0.15	2-Carboxy-4-dodecanolide C13H22O4 + [13]C1C-1 -> [13]C1C12H22O4
1678	132.042	13.23	6.13	Metabolite	C5H8O4	0.44	2-Methylsuccinic acid C5H8O4
1679	665.125	13.42	5.11	Metabolite	C21H29N7O14P2	0.11	NADH C21H29N7O14P2
1680	304.138	13.83	4.93	Putative metabolite	C11H20N4O6	-0.05	Ophthalmic acid C11H19N3O6 + H1N1 -> C11H20N4O6
1681	304.138	11.87	4.62	Putative metabolite	C11H20N4O6	-0.38	Ophthalmic acid C11H19N3O6 + H1N1 -> C11H20N4O6
1682	282.986	13.84	4.99	Artifact	C3H11N1O10P2	-0.64	D-phospho-L-serine C3H8N1O6P1 + H3O4P1 -> C3H11N1O10P2
1683	440.103	14.16	5.15	Putative metabolite	C14H24N4O8S2	0.13	Cysteine-glutathione disulphide C13H22N4O8S2 + C1H2 -> C14H24N4O8S2
1684	244.179	3.03	5.01	Metabolite	C12H24N2O3	0.79	Isoleucyl-Isoleucine C12H24N2O3
1685	822.29	2.55	4.9	Unknown	Unknown	0.24	Unknown
1686	641.967	13.91	5.1	Artifact	C15H22K2N2O17P2	-0.65	UDP-D-glucose C15H24N2O17P2 + H-2K2 -> C15H22K2N2O17P2
1687	488.35	2.77	5.1	Metabolite	C30H48O5	0.36	Pitheduloside I C30H48O5
1688	327.277	2.48	4.88	Metabolite	C19H37N1O3	-0.17	Margaroylglycine C19H37N1O3
1689	159.061	10.2	4.78	Artifact	[13]C1C6H10O4	1.03	Succinylacetone C7H10O4 + [13]C1C-1 -> [13]C1C6H10O4
1690	701.065	13.92	5.17	Artifact	C21H26K1N7O14P2	-0.28	NAD C21H27N7O14P2 + H-1K1 -> C21H26K1N7O14P2
1691	476.119	13.5	5.14	Artifact	C15H25N4Na1O10S1	0.44	glutamate C5H9N1O4 + Peak 1046 -> C15H25N4Na1O10S1
1692	224.072	14.18	4.69	Artifact	[18]O1C7H14N2O3S1	0.33	cystathionine C7H14N2O4S1 + [18]O1O-1 -> [18]O1C7H14N2O3S1
1693	224.072	3.07	5.12	Putative metabolite	C8H16O5S1	0.2	Caprylic acid C8H16O2 + O3S1 -> C8H16O5S1
1694	175.07	13.63	4.77	Artifact	Ring_artifact_C6H13N3O3	0.52	citrulline C6H13N3O3 + Ring_artifact -> Ring_artifact_C6H13N3O3
1695	391.805	13.85	5.09	Artifact	C2H4K3Na1O10S2	-0.06	KHSO4 H1K1O4S1 + H2O4S1 + H-2K2 -> H1K3O8S2 + C2H3Na1O2 -> C2H4K3Na1O10S2
1696	315.988	13.87	5.11	Unknown	Unknown	0.36	Unknown
1697	337.978	13.9	5.1	Artifact	C8H13K2Na1O8	-0.22	CH3COOK C2H3K1O2 + C2H4O2 + C2H3K1O2 -> C6H10K2O6 + C2H3Na1O2 -> C8H13K2Na1O8
1698	302.067	2.88	4.95	Artifact	C9H18O9S1	-0.49	Peak 661 C7H14O7S1 + C2H4O2 -> C9H18O9S1
1699	603.733	13.87	5.1	Artifact	C4H10K5O16P1S2	-0.13	KHSO4 H1K1O4S1 + C2H3K1O2 + C2H3K1O2 -> C4H7K3O8S1 + H1K1O4S1 -> C4H8K4O12S2 + H2K1O4P1 -> C4H10K5O16P1S2
1700	132.055	9.04	4.32	Artifact	[15]N1C5H9O3	0.59	4-Hydroxyproline C5H9N1O3 + [15]N1N-1 -> [15]N1C5H9O3
1701	215.984	13.39	5.16	Artifact	C4Cr1H8N2O5	0.13	glutamine C5H10N2O3 + Cr1O3 -> C5Cr1H10N2O6 - C1H2O1 -> C4Cr1H8N2O5
1702	444.324	2.82	5.06	Metabolite	C28H44O4	-0.09	1-a,24R,25-Trihydroxyvitamin D2 C28H44O4
1703	140.059	5.74	5.17	Metabolite	C6H8N2O2	0.55	1,3-Dimethyluracil C6H8N2O2
1704	197.933	13.93	5.13	Artifact	C3H4K2O5	0.94	KHCO3 C1H1K1O3 + C2H3K1O2
1705	329.898	13.91	4.96	Artifact	C4H9K3O8Si1	-0.03	H4SiO4 H4O4Si1 + C2H3K1O2 + C2H3K1O2 -> C4H10K2O8Si1 + H-1K1 -> C4H9K3O8Si1
1706	157.968	13.92	4.9	Artifact	Ring_artifact_C4H7K1O4	0.56	CH3COOK C2H3K1O2 + C2H4O2 + Ring_artifact -> Ring_artifact_C4H7K1O4
1707	422.15	2.77	5.09	Unknown	Unknown	0.31	Unknown
1708	147.027	13.5	5.15	Artifact	Ring_artifact_C5H9N1O4	0.59	glutamate C5H9N1O4 + Ring_artifact -> Ring_artifact_C5H9N1O4
1709	203.989	13.49	5.19	Artifact	[53]Cr1C4H9N1O5	0.6	glutamate C5H9N1O4 - C1O2 -> C4H9N1O2 + Cr1O3 -> C4Cr1H9N1O5 + [53]Cr1Cr-1 -> [53]Cr1C4H9N1O5
1710	400.355	3.84	4.15	Metabolite	C24H48O4	0.15	MG(a-21:0/0:0/0:0)[rac] C24H48O4
1711	78.0468	4.22	5.11	Metabolite	C6H6	2.05	Benzene C6H6
1712	284.145	2.12	5.07	Artifact	C15H24O3S1	-0.65	2-Dodecylbenzenesulfonic acid C18H30O3S1 - Library_MS2_fragment -> C15H24O3S1
1713	246.994	13.39	5.21	Artifact	[53]Cr1C5H10N2O6	0.95	glutamine C5H10N2O3 + Cr1O3 -> C5Cr1H10N2O6 + [53]Cr1Cr-1 -> [53]Cr1C5H10N2O6
1714	214.021	13.66	5.02	Unknown	Unknown	0.45	Unknown
1715	214.02	11.15	5.23	Artifact	C5H7N2Na1O6	-1.02	Pyroglutamic acid C5H7N1O3 + N1Na1O3 -> C5H7N2Na1O6
1716	214.02	10.84	5.23	Artifact	C5H7N2Na1O6	-1.02	N-carbamoyl-L-aspartate C5H8N2O5 + O1 + H-1Na1 -> C5H7N2Na1O6
1717	248.126	7.13	4.69	Metabolite	C11H20O6	0.36	Prenyl glucoside C11H20O6
1718	341.132	11.33	5.13	Metabolite	C12H23N1O10	-0.01	Lactosamine C12H23N1O10
1719	172.085	13.4	5.14	Metabolite	C7H12N2O3	0.54	Glycylproline C7H12N2O3
1720	172.085	11.6	4.37	Metabolite	C7H12N2O3	-0.04	Glycylproline C7H12N2O3
1721	172.085	12.53	4.99	Metabolite	C7H12N2O3	0.54	Glycyl-L-proline C7H12N2O3
1722	329.184	2.31	5.1	Putative metabolite	C16H27N1O6	-0.19	(-)-trans-Carveol glucoside C16H26O6 + H1N1 -> C16H27N1O6
1723	157.742	13.9	5.02	Unknown	Unknown	0.56	Unknown
1724	762.09	13.9	5.12	Artifact	[13]C1C22H30K1N7O16P2	-1.2	NAD C21H27N7O14P2 + C2H3K1O2 -> C23H30K1N7O16P2 + [13]C1C-1 -> [13]C1C22H30K1N7O16P2
1725	301.139	13.44	5.06	Artifact	C11H19N5O5	0.39	Glutamylhistidine C11H16N4O5 + H3N1 -> C11H19N5O5
1726	469.779	13.84	4.94	Artifact	C3H6K4O13S2	2.36	KHSO4 H1K1O4S1 + C2H3K1O2 + C1H1K1O3 -> C3H5K3O9S1 + H1K1O4S1 -> C3H6K4O13S2
1727	214.056	13.4	5.11	Artifact	C6H11N2Na1O5	0.31	asparagine C4H8N2O3 + C2H3Na1O2 -> C6H11N2Na1O5
1728	289.139	14.17	5.12	Metabolite	C10H19N5O5	0.07	Arginyl-Aspartic acid C10H19N5O5
1729	289.139	14.82	4.98	Metabolite	C10H19N5O5	-0.28	Arginyl-Aspartic acid C10H19N5O5
1730	402.208	2.08	5.18	Artifact	C20H34O6S1	0.02	Peak 84 C19H32O3S1 + C1H2O3 -> C20H34O6S1
1731	254.1	12.16	5.2	Metabolite	C9H18O8	0.27	Galactosylglycerol C9H18O8
1732	254.1	11.6	4.81	Metabolite	C9H18O8	0.27	Galactosylglycerol C9H18O8
1733	495.823	13.92	5.07	Artifact	C7H9K5O13	0.1	CH3COOK C2H3K1O2 + C2H4O2 + Peak 1663 -> C7H9K5O13
1734	185.981	13.51	5.04	Artifact	[13]C1C3Cr1H7N1O4	1.45	2-Pyrrolidinone C4H7N1O1 + Cr1O3 -> C4Cr1H7N1O4 + [13]C1C-1 -> [13]C1C3Cr1H7N1O4
1735	473.767	13.89	5.03	Artifact	[41]K1C4H5K4O12S1	0.69	KHCO3 C1H1K1O3 + C2H3K1O2 + C1H1K1O3 -> C4H5K3O8 + H-1K1 -> C4H4K4O8 + H1K1O4S1 -> C4H5K5O12S1 + [41]K1K-1 -> [41]K1C4H5K4O12S1
1736	190.095	11.34	5.18	Artifact	C7H14N2O4	0.3	L-cis-3-Amino-2-pyrrolidinecarboxylic acid C5H10N2O2 + C2H4O2 -> C7H14N2O4
1737	261.983	14.41	5.11	Artifact	C6H9K1Na2O6	0.99	CH3COOK C2H3K1O2 + C2H3Na1O2 + C2H3Na1O2 -> C6H9K1Na2O6
1738	261.983	16.09	4.7	Putative metabolite	C5H12O6P2S1	0.31	Dimethylallylpyrophosphate C5H12O7P2 + H2S1 -> C5H14O7P2S1 - H2O1 -> C5H12O6P2S1
1739	564.225	2.58	5.03	Artifact	Ring_artifact_C36H68O4	0.27	Oleic acid C18H34O2 * 2 -> C36H68O4 + Ring_artifact -> Ring_artifact_C36H68O4
1740	192.994	13.49	5.09	Unknown	Unknown	0.49	Unknown
1741	192.994	14.11	4.57	Unknown	Unknown	0.49	Unknown
1742	192.994	14.3	4.47	Unknown	Unknown	0.49	Unknown
1743	522.159	13.7	5.04	Artifact	C16H27N8O10P1	0.53	citrulline C6H13N3O3 + Peak 171 -> C16H27N8O10P1
1744	211.084	8.84	5.17	Artifact	C10H13N1O4	0.27	phenylalanine C9H11N1O2 + C1H2O2 -> C10H13N1O4
1745	244.142	7.12	5.08	Metabolite	C11H20N2O4	0.44	Hydroxyprolyl-Isoleucine C11H20N2O4
1746	244.142	6.5	3.81	Metabolite	C11H20N2O4	0.44	Hydroxyprolyl-Isoleucine C11H20N2O4
1747	242.057	13.38	5.09	Artifact	C5H14N2O7Si1	0.53	glutamine C5H10N2O3 + H4O4Si1 -> C5H14N2O7Si1
1748	385.019	13.76	5.13	Artifact	C10H13K1N5O7P1	-0.09	dGMP C10H14N5O7P1 + H-1K1 -> C10H13K1N5O7P1
1749	257.118	16.78	5.14	Artifact	[13]C1C7H17N4Na1O4	0.41	L-Arginine C6H14N4O2 + [13]C1C-1 -> [13]C1C5H14N4O2 + C2H3Na1O2 -> [13]C1C7H17N4Na1O4
1750	482.264	4.23	4.98	Putative metabolite	C22H43O9P1	0.35	Fucose 1-phosphate C6H13O8P1 + C16H30O1 -> C22H43O9P1
1751	97.9762	13.85	7.11	Artifact	C2H3K1O2	8.38	CH3COOK C2H3K1O2
1752	349.221	16.79	5.16	Artifact	[15]N1C12H28N7O4	-0.33	L-Arginine C6H14N4O2 * 2 -> C12H28N8O4 + [15]N1N-1 -> [15]N1C12H28N7O4
1753	329.191	2.08	5.12	Artifact	[13]C1[34]S1C17H30O3	-0.25	2-Dodecylbenzenesulfonic acid C18H30O3S1 + [13]C1C-1 -> [13]C1C17H30O3S1 + [34]S1S-1 -> [13]C1[34]S1C17H30O3
1754	145.841	13.39	5	Unknown	Unknown	0.59	Unknown
1755	146.051	13.4	5.2	Artifact	Ring_artifact_C5H10N2O3	0.59	glutamine C5H10N2O3 + Ring_artifact -> Ring_artifact_C5H10N2O3
1756	372.144	11.81	5.17	Artifact	B1C12H25O12	-0.25	Galactitol C6H14O6 * 2 -> C12H28O12 + B1H-3 -> B1C12H25O12
1757	372.144	11.3	4.06	Artifact	B1C15H26N2O4P1S1	0.52	Peak 3078 C15H29N2O4P1S1 + B1H-3 -> B1C15H26N2O4P1S1
1758	73.9504	6.67	5.14	Unknown	Unknown	1.28	Unknown
1759	759.505	3.04	5.09	Metabolite	C40H74N1O10P1	-0.35	PS(16:0/18:2(9Z,12Z)) C40H74N1O10P1
1760	615.152	14.18	5.04	Artifact	[13]C1[34]S1C19H32N6O12S1	-1.12	glutathione disulfide C20H32N6O12S2 + [13]C1C-1 -> [13]C1C19H32N6O12S2 + [34]S1S-1 -> [13]C1[34]S1C19H32N6O12S1
1761	659.558	13.85	5.03	Unknown	Unknown	0.26	Unknown
1762	293.913	13.85	5.14	Artifact	C2H7K1O10S2	-3.51	KHSO4 H1K1O4S1 + H2O4S1 + C2H4O2 -> C2H7K1O10S2
1763	190.048	13.06	5.05	Metabolite	C7H10O6	0.73	3-Dehydroquinate C7H10O6
1764	76.085	3.43	5.01	Unknown	Unknown	1.25	Unknown
1765	449.854	13.9	4.99	Artifact	C7H11K5O10	-0.1	KHCO3 C1H1K1O3 + C2H3K1O2 + H-1K1 -> C3H3K3O5 + Peak 483 -> C7H11K5O10
1766	206.949	2.07	5.14	Unknown	Unknown	0.46	Unknown
1767	169.004	12.96	5.18	Metabolite	C3H7N1O5S1	0.55	L-Cysteic acid C3H7N1O5S1
1768	211.072	13.66	5.03	Artifact	C6Cl1H14N3O3	0.33	citrulline C6H13N3O3 + Cl1H1 -> C6Cl1H14N3O3
1769	162	13.88	5.07	Artifact	[18]O1[41]K1C4H7O3	1.27	CH3COOK C2H3K1O2 + C2H4O2 + [41]K1K-1 -> [41]K1C4H7O4 + [18]O1O-1 -> [18]O1[41]K1C4H7O3
1770	454.289	7.09	5.07	Artifact	[13]C1C20H44N1O7P1	-0.01	LysoPA(0:0/18:1(9Z)) C21H41O7P1 + H3N1 -> C21H44N1O7P1 + [13]C1C-1 -> [13]C1C20H44N1O7P1
1771	303.168	7.1	5.1	Metabolite	C14H25N1O6	0.29	Pimelylcarnitine C14H25N1O6
1772	144.983	13	5.16	Artifact	C2Cr1H7N1O3	0.69	alanine C3H7N1O2 + Cr1O3 -> C3Cr1H7N1O5 - C1O2 -> C2Cr1H7N1O3
1773	144.983	13.57	4.68	Unknown	Unknown	0.59	Unknown
1774	206.001	7.14	5.09	Artifact	C3Cl1H11O6Si1	0.69	Glycerol C3H8O3 + Cl1H1 -> C3Cl1H9O3 + H2O3Si1 -> C3Cl1H11O6Si1
1775	372.151	12.23	4.52	Metabolite	C20H24N2O3S1	-0.37	Deacetyldiltiazem C20H24N2O3S1
1776	274.076	13.75	5.15	Artifact	[13]C1C7H16K1N3O5	0.21	citrulline C6H13N3O3 + [13]C1C-1 -> [13]C1C5H13N3O3 + C2H3K1O2 -> [13]C1C7H16K1N3O5
1777	246.046	10.53	5.16	Artifact	C6H11N2Na1O7	0.39	Aminoadipic acid C6H11N1O4 + H-1Na1 -> C6H10N1Na1O4 + H1N1O3 -> C6H11N2Na1O7
1778	588.986	14.23	5.13	Unknown	Unknown	0.27	Unknown
1779	148.073	2.81	5.84	Metabolite	C6H12O4	0.4	Mevalonic acid C6H12O4
1780	162.054	7.59	5.26	Putative metabolite	C7H6N4O1	0.38	Dihydropteridine C6H6N4 + C1O1 -> C7H6N4O1
1781	302.013	2.91	4.87	Putative metabolite	C8H14O8S2	0.36	3-Hydroxysuberic acid C8H14O5 + S1 -> C8H14O5S1 + O3S1 -> C8H14O8S2
1782	325.207	3.07	5.07	Metabolite	C18H31N1O2S1	0.15	Farnesylcysteine C18H31N1O2S1
1783	325.207	4.49	5.06	Metabolite	C18H31N1O2S1	0.15	Farnesylcysteine C18H31N1O2S1
1784	271.01	13.59	5.13	Putative metabolite	C7H14N1O4P1S2	-0.05	2,5-Dimethyl-3-(methyldithio)furan C7H10O1S2 + H3N1 -> C7H13N1O1S2 + H1O3P1 -> C7H14N1O4P1S2
1785	247.08	13.67	5.11	Artifact	Ring_artifact_C5Cr1H9N1O7	0.41	glutamate C5H9N1O4 + Cr1O3 -> C5Cr1H9N1O7 + Ring_artifact -> Ring_artifact_C5Cr1H9N1O7
1786	463.746	13.86	5.07	Artifact	C2H5K5O11S2	0.13	KHSO4 H1K1O4S1 + H2O4S1 + H-2K2 -> H1K3O8S2 + C2H3K1O2 -> C2H4K4O10S2 + H1K1O1 -> C2H5K5O11S2
1787	509.733	13.86	5	Artifact	[41]K1C3H5K4O13S2	1.79	KHSO4 H1K1O4S1 + C2H4O2 + H-1K1 -> C2H4K2O6S1 + Peak 1643 -> C3H5K5O13S2 + [41]K1K-1 -> [41]K1C3H5K4O13S2
1788	163.092	4.21	5.05	Unknown	Unknown	0.55	Unknown
1789	144.14	4.22	5.13	Artifact	Ring_artifact_C8H16O2	0.6	Caprylic acid C8H16O2 + Ring_artifact -> Ring_artifact_C8H16O2
1790	157.035	13.3	5.14	Artifact	C4H8N1Na1O4	1.29	glycine C2H5N1O2 + C2H3Na1O2 -> C4H8N1Na1O4
1791	157.035	13.01	5.14	Artifact	C4H8N1Na1O4	0.65	alanine C3H7N1O2 + C1H1Na1O2 -> C4H8N1Na1O4
1792	282.122	8.49	4.14	Metabolite	C13H18N2O5	0.25	Threoninyl-Tyrosine C13H18N2O5
1793	275.159	13.88	4.97	Metabolite	C10H21N5O4	0.2	Arginyl-Threonine C10H21N5O4
1794	275.159	14.13	4.97	Metabolite	C10H21N5O4	-0.17	Arginyl-Threonine C10H21N5O4
1795	919.308	2.56	5.04	Unknown	Unknown	0.23	Unknown
1796	402.168	2.94	5.11	Artifact	C22H26O7	-0.12	13-Hydroxy-5'-O-methylmelledonal C24H30O9 - Library_MS2_fragment -> C22H26O7
1797	169.041	7.58	5.17	Metabolite	C4H11N1O4S1	1.06	[2-(dimethylamino)ethoxy]sulfonic acid C4H11N1O4S1
1798	584.352	7.11	5.06	Artifact	[13]C1C26H54N1O10P1	-0.36	Peak 588 C27H54N1O10P1 + [13]C1C-1 -> [13]C1C26H54N1O10P1
1799	75.9469	3.12	5.03	Unknown	Unknown	1.25	Unknown
1800	75.9469	3.42	5.03	Unknown	Unknown	1.25	Unknown
1801	315.175	2.09	5.13	Artifact	[13]C1[34]S1C16H28O3	-0.74	N-Undecylbenzenesulfonic acid C17H28O3S1 + [13]C1C-1 -> [13]C1C16H28O3S1 + [34]S1S-1 -> [13]C1[34]S1C16H28O3
1802	320.098	13.58	5.14	Artifact	C8H21N2O9P1	0.21	Glycerophosphocholine C8H20N1O6P1 + H1N1O3 -> C8H21N2O9P1
1803	217.143	14.37	5.17	Metabolite	C9H19N3O3	0.65	Gamma-glutamyl-L-putrescine C9H19N3O3
1804	261.033	14.18	5.13	Artifact	[13]C1C5H13O9P1	0.66	glucose-1-phosphate C6H13O9P1 + [13]C1C-1 -> [13]C1C5H13O9P1
1805	258.202	2.61	5.08	Artifact	Ring_artifact_C14H26O4	0.4	Tetradecanedioic acid C14H26O4 + Ring_artifact -> Ring_artifact_C14H26O4
1806	258.202	4.06	4.39	Artifact	[13]C1C13H27N1O3	0.19	N-Lauroylglycine C14H27N1O3 + [13]C1C-1 -> [13]C1C13H27N1O3
1807	306.072	13.47	5.13	Artifact	[13]C1C9H15N3O6S1	0.04	Peak 403 C10H15N3O6S1 + [13]C1C-1 -> [13]C1C9H15N3O6S1
1808	293.122	13.45	5.04	Artifact	C10H19N3O7	0	gamma-Glutamylglutamic acid C10H16N2O7 + H3N1 -> C10H19N3O7
1809	126.008	13.53	5.1	Metabolite	C2H7O4P1	0.76	Ethylphosphate C2H7O4P1
1810	555.354	3.07	5.04	Artifact	C26H54N1O9P1	-0.15	Peak 2041 C27H56N1O10P1 - C1H2O1 -> C26H54N1O9P1
1811	302.031	2.95	4.93	Putative metabolite	C8H14O10S1	0.89	{[2,3,4-trihydroxy-5-(hydroxymethyl)oxolan-2-yl]methoxy}sulfonic acid C6H12O9S1 + C2H2O1 -> C8H14O10S1
1812	324.104	13.49	5.07	Artifact	C11H17N4Na1O6	0.24	Glutamylhistidine C11H16N4O5 + H1Na1O1 -> C11H17N4Na1O6
1813	324.103	11.8	4.57	Artifact	C10H21Na1O10	0.13	Galactitol C6H14O6 + C2H3Na1O2 -> C8H17Na1O8 + C2H4O2 -> C10H21Na1O10
1814	193.074	5.61	4.87	Metabolite	C10H11N1O3	0.48	Phenylacetylglycine C10H11N1O3
1815	141.04	13.01	5.11	Artifact	C4H8N1Na1O3	-0.09	threonine C4H9N1O3 + H-1Na1 -> C4H8N1Na1O3
1816	362.145	13.57	5.08	Artifact	C11H27N2O9P1	0.32	serine C3H7N1O3 + Peak 1326 -> C11H27N2O9P1
1817	362.143	11.84	4.79	Putative metabolite	C12H26O12	-0.48	Maltitol C12H24O11 + H2O1 -> C12H26O12
1818	258.102	13.65	5.06	Artifact	[13]C1C7H16N3Na1O5	0.08	citrulline C6H13N3O3 + [13]C1C-1 -> [13]C1C5H13N3O3 + C2H3Na1O2 -> [13]C1C7H16N3Na1O5
1819	118.027	13.31	7.71	Metabolite	C4H6O4	0.07	Methylmalonic acid C4H6O4
1820	207.046	14.03	5.1	Artifact	[13]C1C6H10O7	1	2-Methylcitric acid C7H10O7 + [13]C1C-1 -> [13]C1C6H10O7
1821	288.081	13.38	5.15	Artifact	C7H20N2O6S1Si1	1.16	Peak 2968 C9H20N2O6S1 + H2O3Si1 -> C9H22N2O9S1Si1 - C1O2 -> C8H22N2O7S1Si1 - C1H2O1 -> C7H20N2O6S1Si1
1822	164.068	4.11	5.08	Artifact	C6H12O5	0.45	2-Hydroxyvaleric acid C5H10O3 + C1H2O2 -> C6H12O5
1823	179.067	16.76	5.15	Artifact	C6H10N3Na1O2	0.96	L-Arginine C6H14N4O2 - H3N1 -> C6H11N3O2 + H-1Na1 -> C6H10N3Na1O2
1824	121.863	4.21	4.85	Unknown	Unknown	0.68	Unknown
1825	275.071	13.74	5.08	Artifact	[41]K1C8H16N3O5	0.08	citrulline C6H13N3O3 + C2H3K1O2 -> C8H16K1N3O5 + [41]K1K-1 -> [41]K1C8H16N3O5
1826	388.122	13.88	5.07	Artifact	C13H24O13	-0.54	Lactose C12H22O11 + C1H2O2 -> C13H24O13
1827	388.122	14.84	4.62	Artifact	C13H24O13	-0.28	Melibiose C12H22O11 + C1H2O2 -> C13H24O13
1828	427.865	13.86	5.03	Artifact	C4H11K3O12S1Si1	0.16	KHSO4 H1K1O4S1 + C2H3K1O2 + Peak 795 -> C4H11K3O12S1Si1
1829	295.109	13	5.1	Artifact	B1C10H14N5O5	0	Asparaginyl-Histidine C10H15N5O4 + B1H-1O1 -> B1C10H14N5O5
1830	295.11	13.5	5.01	Artifact	[13]C1C9H18N2O8	-0.1	glutamate C5H9N1O4 * 2 -> C10H18N2O8 + [13]C1C-1 -> [13]C1C9H18N2O8
1831	103.096	13.49	5.15	Artifact	Ring_artifact_C4H9N1O2	0.77	glutamate C5H9N1O4 - C1O2 -> C4H9N1O2 + Ring_artifact -> Ring_artifact_C4H9N1O2
1832	103.096	12.16	4.43	Artifact	Ring_artifact_C4H9N1O2	0.77	b-Aminoisobutyric acid C4H9N1O2 + Ring_artifact -> Ring_artifact_C4H9N1O2
1833	358.007	14.18	5.05	Artifact	C8H16K1O11P1	0.08	glucose-1-phosphate C6H13O9P1 + C2H3K1O2 -> C8H16K1O11P1
1834	211.005	13.45	5.07	Artifact	C5Cr1H9N3O3	0.47	asparagine C4H8N2O3 + Cr1O3 -> C4Cr1H8N2O6 + C2H3N1 -> C6Cr1H11N3O6 - H2O1 -> C6Cr1H9N3O5 - C1O2 -> C5Cr1H9N3O3
1835	211.005	14.11	4.44	Unknown	Unknown	0.46	Unknown
1836	242.019	12.07	5.16	Metabolite	C6H11O8P1	-0.19	Inositol cyclic phosphate C6H11O8P1
1837	355.094	13.01	5.06	Artifact	C12H21N1O9S1	0.57	Peak 2909 C13H23N1O10S1 - C1H2O1 -> C12H21N1O9S1
1838	583.385	7.09	5.04	Unknown	Unknown	0.27	Unknown
1839	305.122	12.98	5.13	Artifact	C11H19N3O7	0	Glutaminylproline C10H17N3O4 + C1H2O3 -> C11H19N3O7
1840	103.031	12.16	4.43	Artifact	Ring_artifact_C4H9N1O2	0.77	b-Aminoisobutyric acid C4H9N1O2 + Ring_artifact -> Ring_artifact_C4H9N1O2
1841	637.302	2.51	4.98	Unknown	Unknown	0.26	Unknown
1842	252.011	13.37	5.04	Unknown	Unknown	0.41	Unknown
1843	316.944	13.58	5.11	Artifact	Ring_artifact_C10H24N1O8P1	0.36	Glycerophosphocholine C8H20N1O6P1 + C2H4O2 -> C10H24N1O8P1 + Ring_artifact -> Ring_artifact_C10H24N1O8P1
1844	177.051	14.42	5.14	Unknown	Unknown	0.51	Unknown
1845	430.199	2.85	5.12	Metabolite	C24H30O7	-0.11	Mammea E/BB C24H30O7
1846	359.89	13.93	5.02	Artifact	C5H7K3O11	-0.4	KHCO3 C1H1K1O3 + C2H3K1O2 + C1H1K1O3 -> C4H5K3O8 + C1H2O3 -> C5H7K3O11
1847	305.041	11.31	5.13	Metabolite	C9H12N3O7P1	-0.05	Cytidine 2',3'-cyclic phosphate C9H12N3O7P1
1848	105.014	13.4	5.04	Artifact	[13]C1C2H4O4	0.13	Malonic acid C3H4O4 + [13]C1C-1 -> [13]C1C2H4O4
1849	157.976	13.91	5.09	Artifact	Ring_artifact_C4H7K1O4	0.56	CH3COOK C2H3K1O2 + C2H4O2 + Ring_artifact -> Ring_artifact_C4H7K1O4
1850	288.005	11.3	5.09	Artifact	C7Cr1H12N2O7	-0.15	Peak 3989 C14H24N4O8 / 2 -> C7H12N2O4 + Cr1O3 -> C7Cr1H12N2O7
1851	710.13	14.2	5.13	Artifact	C22H35K1N6O14S2	-1.45	glutathione disulfide C20H32N6O12S2 + C2H3K1O2 -> C22H35K1N6O14S2
1852	358.226	3.94	3.86	Artifact	C21H30N2O3	0.12	Nateglinide C19H27N1O3 + C2H3N1 -> C21H30N2O3
1853	340.12	4.87	5.12	Artifact	C14H20N4O4S1	1.55	Peak 1190 C12H16N4O2S1 + C2H4O2 -> C14H20N4O4S1
1854	665.115	13.92	5.03	Putative metabolite	C23H25N9O11P2	0.26	Levosimendan C14H12N6O1 + C9H13N3O10P2 -> C23H25N9O11P2
1855	247.082	9.05	4.72	Putative metabolite	C9H9N7O2	-0.52	Azathioprine C9H7N7O2S1 + H2 -> C9H9N7O2S1 - S1 -> C9H9N7O2
1856	247.079	11.81	4.77	Artifact	[18]O1C6H15N1O8	0.51	Galactitol C6H14O6 + H1N1O3 -> C6H15N1O9 + [18]O1O-1 -> [18]O1C6H15N1O8
1857	247.079	11.36	4.68	Artifact	[18]O1C6H15N1O8	0.51	Galactitol C6H14O6 + H1N1O3 -> C6H15N1O9 + [18]O1O-1 -> [18]O1C6H15N1O8
1858	144.986	13.9	5.04	Artifact	[13]C1C2H5K1O4	1	C2H4O2 C2H4O2 + C1H1K1O2 + [13]C1C-1 -> [13]C1C2H5K1O4
1859	273.057	11.29	5.05	Artifact	C7H12N3Na1O7	-0.02	Peak 3989 C14H24N4O8 / 2 -> C7H12N2O4 + N1Na1O3 -> C7H12N3Na1O7
1860	273.063	13.76	5	Artifact	C6H15N3O7S1	-0.84	citrulline C6H13N3O3 + H2O4S1 -> C6H15N3O7S1
1861	135.042	13.57	5.09	Artifact	[18]O1C4H7N1O3	1.14	aspartate C4H7N1O4 + [18]O1O-1 -> [18]O1C4H7N1O3
1862	135.042	11.29	4.69	Artifact	[18]O1C4H7N1O3	0.4	L-Aspartic acid C4H7N1O4 + [18]O1O-1 -> [18]O1C4H7N1O3
1863	473.748	13.88	4.98	Artifact	C3H3K5O13S1	0.36	KHCO3 C1H1K1O3 + H2O4S1 - C1O2 -> H3K1O5S1 - H2O1 -> H1K1O4S1 + Peak 1663 -> C3H3K5O13S1
1864	287.196	12.95	4.57	Metabolite	C12H25N5O3	0.14	Arginyl-Isoleucine C12H25N5O3
1865	287.196	12.12	5.14	Metabolite	C12H25N5O3	0.14	Arginyl-Isoleucine C12H25N5O3
1866	361.054	2.65	4.83	Artifact	C15H11N3O8	0.87	Peak 1074 C14H9N3O5 + C1H2O3 -> C15H11N3O8
1867	370.104	13.01	5.13	Artifact	C12H22N2O9S1	0.54	Peak 1070 C10H19N1O9S1 + C2H3N1 -> C12H22N2O9S1
1868	308.082	13.49	5.07	Putative metabolite	C15H17O5P1	-0.45	Nabumetone C15H16O2 + H1O3P1 -> C15H17O5P1
1869	175.021	13.72	5.49	Artifact	Ring_artifact_C6H13N3O3	0.52	citrulline C6H13N3O3 + Ring_artifact -> Ring_artifact_C6H13N3O3
1870	175.02	14.18	4.98	Unknown	Unknown	0.52	Unknown
1871	195.089	2.54	5.07	Metabolite	C10H13N1O3	0.22	Metyrosine C10H13N1O3
1872	217.125	13.37	5.05	Artifact	[13]C1C7H16N4O3	0.9	N-Acetyl-L-arginine C8H16N4O3 + [13]C1C-1 -> [13]C1C7H16N4O3
1873	689.302	13.6	4.98	Artifact	C39H47N1O8S1	0.78	S-Furanopetasitin C24H32O5S1 + Peak 1326 -> C39H47N1O8S1
1874	158.088	16.78	5.11	Artifact	[13]C1C5H11N3O2	1.78	L-Arginine C6H14N4O2 + [13]C1C-1 -> [13]C1C5H14N4O2 - H3N1 -> [13]C1C5H11N3O2
1875	321.081	5.3	5.12	Artifact	C10H15N3O9	0.09	Ribothymidine C10H14N2O6 + H1N1O3 -> C10H15N3O9
1876	836.988	13.88	4.94	Artifact	C21H27K2N7O18P2S1	-0.16	NAD C21H27N7O14P2 + H-1K1 -> C21H26K1N7O14P2 + H1K1O4S1 -> C21H27K2N7O18P2S1
1877	219.885	13.86	5	Artifact	C1H2K2O6S1	0.56	KHSO4 H1K1O4S1 + C1H1K1O2
1878	244.046	13.77	5.07	Artifact	C7H13K1N2O5	0.63	D-Alanyl-D-alanine C6H12N2O3 + C1H1K1O2 -> C7H13K1N2O5
1879	244.046	13.38	5.08	Artifact	C5H13N2O7P1	0.56	glutamine C5H10N2O3 + H3O4P1 -> C5H13N2O7P1
1880	145.173	4.2	5.15	Artifact	Ring_artifact_[13]C1C7H16O2	0.59	Caprylic acid C8H16O2 + [13]C1C-1 -> [13]C1C7H16O2 + Ring_artifact -> Ring_artifact_[13]C1C7H16O2
1881	152.068	9.89	6.36	Metabolite	C5H12O5	1.14	D-Arabitol C5H12O5
1882	284.112	13.53	5.01	Metabolite	C11H16N4O5	0.25	Glutamylhistidine C11H16N4O5
1883	175.34	13.66	4.94	Unknown	Unknown	0.52	Unknown
1884	772.346	2.78	5.03	Artifact	C44H52O12	-0.03	Porson C22H26O6 * 2 -> C44H52O12
1885	273.132	13	5.01	Artifact	C11H19N3O5	-0.11	L-beta-aspartyl-L-leucine C10H18N2O5 + C1H1N1 -> C11H19N3O5
1886	503.767	13.86	5	Artifact	C2H8K4O14S2Si1	0	KHSO4 H1K1O4S1 + H2O4S1 + H-2K2 -> H1K3O8S2 + Peak 795 -> C2H8K4O14S2Si1
1887	606.009	13.91	4.94	Artifact	[41]K1C15H23N2O17P2	0.7	UDP-D-glucose C15H24N2O17P2 + H-1K1 -> C15H23K1N2O17P2 + [41]K1K-1 -> [41]K1C15H23N2O17P2
1888	244.037	13.39	5.06	Artifact	C7Ca1H12N2O5	0.87	glutamine C5H10N2O3 + C2Ca1H2O2 -> C7Ca1H12N2O5
1889	90.0776	13	5.08	Artifact	Ring_artifact_[13]C1C2H7N1O2	1.08	alanine C3H7N1O2 + [13]C1C-1 -> [13]C1C2H7N1O2 + Ring_artifact -> Ring_artifact_[13]C1C2H7N1O2
1890	379.257	2.75	5.03	Artifact	C18H37N1O7	0.01	MG(0:0/15:0/0:0) C18H36O4 + H1N1O3 -> C18H37N1O7
1891	351.11	14.24	5.1	Metabolite	C12H21N3O7S1	-0.23	S-(2-Hydroxyethyl)glutathione C12H21N3O7S1
1892	203.004	13.41	5.09	Artifact	[53]Cr1C4H10N2O4	1.51	glutamine C5H10N2O3 + Cr1O3 -> C5Cr1H10N2O6 - C1O2 -> C4Cr1H10N2O4 + [53]Cr1Cr-1 -> [53]Cr1C4H10N2O4
1893	821.322	2.53	4.94	Unknown	Unknown	0.24	Unknown
1894	223.051	13.51	5.04	Artifact	C7H13N1O5S1	0.64	2-hydroxypyridine C5H5N1O1 + Peak 3426 -> C7H13N1O5S1
1895	165.98	2.56	5.04	Artifact	Ring_artifact_C5H10O6	0.54	Arabinonic acid C5H10O6 + Ring_artifact -> Ring_artifact_C5H10O6
1896	591.821	13.9	4.97	Artifact	C8H14K5O16P1	-0.37	CH3COOK C2H3K1O2 + C2H4O2 + Peak 1550 -> C8H14K5O16P1
1897	332.235	2.6	4.89	Artifact	C21H32O3	-0.17	Retinoic Acid C20H28O2 + C1H4O1 -> C21H32O3
1898	237.926	13.94	5.11	Artifact	C3H5K2Na1O6	0.4	KHCO3 C1H1K1O3 + C2H3K1O2 + H1Na1O1 -> C3H5K2Na1O6
1899	287.254	2.66	5.01	Artifact	[13]C1C16H34O3	0.17	Avocadene C17H34O3 + [13]C1C-1 -> [13]C1C16H34O3
1900	435.802	13.92	4.97	Artifact	C5H5K5O11	0.05	KHCO3 C1H1K1O3 + C2H3K1O2 + C1H1K1O3 -> C4H5K3O8 + H-1K1 -> C4H4K4O8 + C1H1K1O3 -> C5H5K5O11
1901	91.0479	13.01	4.97	Artifact	[13]C1[15]N1C2H7O2	1.63	alanine C3H7N1O2 + [13]C1C-1 -> [13]C1C2H7N1O2 + [15]N1N-1 -> [13]C1[15]N1C2H7O2
1902	582.373	3.07	5.02	Unknown	Unknown	0.27	Unknown
1903	147.123	4.2	4.92	Artifact	[13]C1[18]O1C7H16O1	0.89	Caprylic acid C8H16O2 + [13]C1C-1 -> [13]C1C7H16O2 + [18]O1O-1 -> [13]C1[18]O1C7H16O1
1904	294.062	5.3	5.12	Artifact	C10Cl1H15N2O6	-0.12	Ribothymidine C10H14N2O6 + Cl1H1 -> C10Cl1H15N2O6
1905	294.059	7.67	4.6	Artifact	C10H7N8Na1O2	-0.12	hypoxanthine C5H4N4O1 + Peak 1615 -> C10H7N8Na1O2
1906	294.059	8.76	4.09	Artifact	C12H12N2Na2O4	-0.18	tryptophan C11H12N2O2 + C1H2O2 -> C12H14N2O4 + H-2Na2 -> C12H12N2Na2O4
1907	146.087	13.4	5.17	Artifact	Ring_artifact_C5H10N2O3	0.59	glutamine C5H10N2O3 + Ring_artifact -> Ring_artifact_C5H10N2O3
1908	336.068	8.67	5.13	Artifact	C11H13N4Na1O7	-0.32	inosine C10H12N4O5 + C1H1Na1O2 -> C11H13N4Na1O7
1909	182.079	11.36	6.87	Metabolite	C6H14O6	0.76	Galactitol C6H14O6
1910	182.077	10.79	5.83	Artifact	[13]C1C8H11N1O3	0.26	tyrosine C9H11N1O3 + [13]C1C-1 -> [13]C1C8H11N1O3
1911	296.145	2.14	5.07	Putative metabolite	C16H24O3S1	0.05	Tertatolol C16H25N1O2S1 + H-1N-1O1 -> C16H24O3S1
1912	268.153	9.79	5.09	Metabolite	C12H20N4O3	0.52	Histidinyl-Isoleucine C12H20N4O3
1913	97.7765	13.84	4.93	Unknown	Unknown	1.01	Unknown
1914	237.885	13.85	5.04	Artifact	[34]S1[41]K1H3O8S1	0.23	KHSO4 H1K1O4S1 + H2O4S1 + [34]S1S-1 -> [34]S1H3K1O8S1 + [41]K1K-1 -> [34]S1[41]K1H3O8S1
1915	147.079	13.49	5.19	Artifact	Ring_artifact_C5H9N1O4	0.59	glutamate C5H9N1O4 + Ring_artifact -> Ring_artifact_C5H9N1O4
1916	250.095	7.1	5.05	Putative metabolite	C12H14N2O4	0.23	L-Kynurenine C10H12N2O3 + C2H2O1 -> C12H14N2O4
1917	250.095	8.72	4.79	Artifact	C12H14N2O4	0.23	tryptophan C11H12N2O2 + C1H2O2 -> C12H14N2O4
1918	440.227	13.05	5.01	Unknown	Unknown	0.3	Unknown
1919	820.566	4.37	5.11	Artifact	[13]C1C42H82N1O11P1	0.13	Peak 1327 C43H82N1O11P1 + [13]C1C-1 -> [13]C1C42H82N1O11P1
1920	820.566	3.08	4.89	Unknown	Unknown	0.24	Unknown
1921	164.051	3.45	5.13	Putative metabolite	C6H12O3S1	0.7	3-(Methylthio)propyl acetate C6H12O2S1 + O1 -> C6H12O3S1
1922	348.975	13.81	5.04	Artifact	C6H13K2N3O7S1	0.38	citrulline C6H13N3O3 + H1K1O4S1 -> C6H14K1N3O7S1 + H-1K1 -> C6H13K2N3O7S1
1923	247.962	13.48	5	Unknown	Unknown	0.41	Unknown
1924	152.106	2.92	4.87	Artifact	Ring_artifact_C8H8O3	0.57	3-Hydroxyphenylacetic acid C8H8O3 + Ring_artifact -> Ring_artifact_C8H8O3
1925	696.069	13.88	4.98	Artifact	C18H35K2O21P1	-0.78	CH3COOK C2H3K1O2 + C2H4O2 + Peak 1638 -> C18H35K2O21P1
1926	290.993	13.83	5.06	Artifact	C6Ca1H10N3O6P1	1.76	Phosphocreatinine C4H8N3O4P1 + C2Ca1H2O2 -> C6Ca1H10N3O6P1
1927	257.979	13.9	4.98	Artifact	[18]O1C6H10K2O5	0.77	CH3COOK C2H3K1O2 + C2H4O2 + C2H3K1O2 -> C6H10K2O6 + [18]O1O-1 -> [18]O1C6H10K2O5
1928	484.28	4.22	4.89	Putative metabolite	C22H45O9P1	0.66	Fucose 1-phosphate C6H13O8P1 + C16H30O1 -> C22H43O9P1 + H2 -> C22H45O9P1
1929	133.954	13.86	5	Artifact	C2Cl1H4K1O2	0.66	CH3COOK C2H3K1O2 + Cl1H1
1930	335.873	13.86	5.07	Artifact	[41]K2C4H7K1O8S1	0.96	KHSO4 H1K1O4S1 + C2H3K1O2 + C2H3K1O2 -> C4H7K3O8S1 + [41]K1K-1 -> [41]K1C4H7K2O8S1 + [41]K1K-1 -> [41]K2C4H7K1O8S1
1931	146.297	13.38	4.99	Unknown	Unknown	0.59	Unknown
1932	340.077	13.98	5.01	Artifact	[13]C1C9H17N3O8S1	-0.03	Peak 3096 C8H14N2O8S1 + C2H3N1 -> C10H17N3O8S1 + [13]C1C-1 -> [13]C1C9H17N3O8S1
1933	257.087	12.23	5.11	Artifact	C9H16N1Na1O6	0.12	N-Carboxyethyl-g-aminobutyric acid C7H13N1O4 + C2H3Na1O2 -> C9H16N1Na1O6
1934	185.021	13.41	4.91	Artifact	[18]O1C7H5N1O4	1.18	quinolinate C7H5N1O4 + O1 + [18]O1O-1 -> [18]O1C7H5N1O4
1935	569.746	13.88	4.96	Artifact	C6H8K6O14S1	0.03	CH3COOK C2H3K1O2 + C2H4O2 + Peak 2688 -> C6H8K6O14S1
1936	281.505	2.26	4.96	Unknown	Unknown	0.38	Unknown
1937	126.079	11.3	5.05	Artifact	C6H10N2O1	0.9	2-Pyrrolidinone C4H7N1O1 + C2H3N1 -> C6H10N2O1
1938	245.149	14.1	5.11	Metabolite	C9H19N5O3	0.77	Alanyl-Arginine C9H19N5O3
1939	146.094	13.38	5.04	Artifact	Ring_artifact_C5H10N2O3	0.59	glutamine C5H10N2O3 + Ring_artifact -> Ring_artifact_C5H10N2O3
1940	231.921	13.93	5.07	Artifact	C2H6K2O6Si1	0.77	H4SiO4 H4O4Si1 + C2H3K1O2 + H-1K1 -> C2H6K2O6Si1
1941	423.984	2.15	5.07	Putative metabolite	C15H8N2O11S1	1.13	Cinnavalininate C14H8N2O6 + C1O2 -> C15H8N2O8 + O3S1 -> C15H8N2O11S1
1942	187.046	13.45	4.96	Artifact	C5H10N1Na1O5	0.89	serine C3H7N1O3 + C2H3Na1O2 -> C5H10N1Na1O5
1943	226.039	2.63	4.55	Unknown	Unknown	0.44	Unknown
1944	122.05	4.2	5.06	Artifact	Ring_artifact_C7H6O2	0.67	Benzoic acid C7H6O2 + Ring_artifact -> Ring_artifact_C7H6O2
1945	147.283	13.5	5.06	Unknown	Unknown	0.59	Unknown
1946	484.19	12.97	4.96	Putative metabolite	C18H32N2O13	0.29	N-Carboxyethyl-g-aminobutyric acid C7H13N1O4 + H2O1 -> C7H15N1O5 + C11H17N1O8 -> C18H32N2O13
1947	218.024	4.21	4.93	Artifact	C7H10O6Si1	0.75	Benzoic acid C7H6O2 + H4O4Si1 -> C7H10O6Si1
1948	117.025	7.64	4.34	Metabolite	C4H7N1O1S1	0.3	Homocysteine thiolactone C4H7N1O1S1
1949	151.063	3.71	4.73	Metabolite	C8H9N1O2	1.51	Acetaminophen C8H9N1O2
1950	370.159	11.3	5.08	Artifact	C13H26N2O10	0.12	Peak 4632 C13H23N1O10 + H3N1 -> C13H26N2O10
1951	266.05	14.21	4.77	Artifact	B1C13H7N2O4	0.7	Thalidomide C13H10N2O4 + B1H-3 -> B1C13H7N2O4
1952	296.032	13.01	4.98	Artifact	[60]Ni1C8H16N2O6	0.08	alanine C3H7N1O2 * 2 -> C6H14N2O4 + C2H2Ni1O2 -> C8H16N2Ni1O6 + [60]Ni1Ni-1 -> [60]Ni1C8H16N2O6
1953	572.296	3.07	5.01	Metabolite	C25H49O12P1	0.11	1-Palmitoylglycerophosphoinositol C25H49O12P1
1954	260.148	14.79	4.77	Metabolite	C10H20N4O4	0.6	Asparaginyl-Lysine C10H20N4O4
1955	260.148	14.34	5.1	Metabolite	C10H20N4O4	0.6	Asparaginyl-Lysine C10H20N4O4
1956	530.297	7.1	5.03	Putative metabolite	C27F3H41N2O5	0.48	2-hydroxyflutamide C11F3H11N2O4 + C16H30O1 -> C27F3H41N2O5
1957	404.993	13.47	5.04	Artifact	C10Cr1H15N3O9S1	0.02	Peak 403 C10H15N3O6S1 + Cr1O3 -> C10Cr1H15N3O9S1
1958	158.021	13.84	5.08	Artifact	Ring_artifact_C4H7K1O4	0.56	CH3COOK C2H3K1O2 + C2H4O2 + Ring_artifact -> Ring_artifact_C4H7K1O4
1959	681.614	13.85	4.99	Artifact	C3H5K7O17S3	0.93	KHSO4 H1K1O4S1 + H2O4S1 + Peak 856 -> C3H5K7O17S3
1960	193.975	7.07	5.09	Unknown	Unknown	0.48	Unknown
1961	322.145	4.23	4.91	Putative metabolite	C14H26O6S1	0.65	3-Oxotetradecanoic acid C14H26O3 + O3S1 -> C14H26O6S1
1962	278.13	4.31	5.06	Metabolite	C11H22N2O4S1	0.1	Pantetheine C11H22N2O4S1
1963	278.13	3.15	4.05	Metabolite	C11H22N2O4S1	0.1	Pantetheine C11H22N2O4S1
1964	273.18	13.06	5.05	Metabolite	C11H23N5O3	0.33	Arginyl-Valine C11H23N5O3
1965	122.017	4.22	4.93	Artifact	Ring_artifact_C7H6O2	0.67	Benzoic acid C7H6O2 + Ring_artifact -> Ring_artifact_C7H6O2
1966	240.184	2.58	5.09	Artifact	Ring_artifact_C8H16O6S1	0.42	2-Hydroxyoctanoic acid C8H16O3 + O3S1 + Ring_artifact -> Ring_artifact_C8H16O6S1
1967	332.101	16.77	5.07	Artifact	C10Ca1H20N4O6	-0.37	L-Arginine C6H14N4O2 + C2H4O2 -> C8H18N4O4 + C2Ca1H2O2 -> C10Ca1H20N4O6
1968	150.06	13.5	5.06	Artifact	[13]C1[18]O1C4H9N1O3	2.39	glutamate C5H9N1O4 + [13]C1C-1 -> [13]C1C4H9N1O4 + [18]O1O-1 -> [13]C1[18]O1C4H9N1O3
1969	230.036	13.57	5.03	Artifact	C8H10N2O4S1	0.99	Pyridoxamine C8H12N2O2 + O3S1 - H2O1 -> C8H10N2O4S1
1970	132.137	16.78	5.12	Artifact	Ring_artifact_C5H12N2O2	0.64	ornithine C5H12N2O2 + Ring_artifact -> Ring_artifact_C5H12N2O2
1971	132.137	16.24	5.13	Artifact	Ring_artifact_C5H12N2O2	0.64	ornithine C5H12N2O2 + Ring_artifact -> Ring_artifact_C5H12N2O2
1972	115.063	7.6	5.12	Metabolite	C5H9N1O2	0.25	L-Proline C5H9N1O2
1973	189.973	13.01	5.04	Artifact	[53]Cr1C3H7N1O5	0.38	alanine C3H7N1O2 + Cr1O3 -> C3Cr1H7N1O5 + [53]Cr1Cr-1 -> [53]Cr1C3H7N1O5
1974	238.062	13.97	5.08	Metabolite	C7H14N2O5S1	0.18	Cystathionine sulfoxide C7H14N2O5S1
1975	233.109	13.4	5.05	Artifact	[13]C1C8H16N2O5	0.76	Glycylproline C7H12N2O3 + C2H4O2 -> C9H16N2O5 + [13]C1C-1 -> [13]C1C8H16N2O5
1976	217.968	13.5	5.01	Artifact	[53]Cr1C4H7N1O6	0.85	glutamate C5H9N1O4 + Cr1O3 -> C5Cr1H9N1O7 - C1H2O1 -> C4Cr1H7N1O6 + [53]Cr1Cr-1 -> [53]Cr1C4H7N1O6
1977	228.147	8.88	5.05	Metabolite	C11H20N2O3	-0.03	Isoleucylproline C11H20N2O3
1978	228.147	7.97	4.71	Metabolite	C11H20N2O3	-0.03	Isoleucylproline C11H20N2O3
1979	358.114	4.25	4.53	Putative metabolite	C11H23N2O9P1	-0.23	N-(1-Deoxy-1-fructosyl)proline C11H19N1O7 + H1O3P1 -> C11H20N1O10P1 + H3N1O-1 -> C11H23N2O9P1
1980	89.0628	13.01	5.23	Artifact	Ring_artifact_C3H7N1O2	1.09	alanine C3H7N1O2 + Ring_artifact -> Ring_artifact_C3H7N1O2
1981	208.171	2.57	5.05	Artifact	[18]O1C14H22	0.53	4-(1,1,3,3-Tetramethylbutyl)-phenol C14H22O1 + [18]O1O-1 -> [18]O1C14H22
1982	245.066	14.35	5.05	Artifact	C6H16N1O7P1	0.56	Phosphorylcholine C5H14N1O4P1 + C1H2O3 -> C6H16N1O7P1
1983	446.2	16.77	4.98	Artifact	C14H31K1N8O6	0.36	L-Arginine C6H14N4O2 + Peak 812 -> C14H31K1N8O6
1984	90.0242	13.01	5.06	Artifact	Ring_artifact_[13]C1C2H7N1O2	1.08	alanine C3H7N1O2 + [13]C1C-1 -> [13]C1C2H7N1O2 + Ring_artifact -> Ring_artifact_[13]C1C2H7N1O2
1985	196.031	13.87	5	Artifact	Ring_artifact_C2H5K1O6S1	0.48	KHSO4 H1K1O4S1 + C2H4O2 + Ring_artifact -> Ring_artifact_C2H5K1O6S1
1986	426.259	7.1	4.44	Artifact	[13]C1C18H40N1O7P1	-2.59	1-palmitoyl-dihydroxyacetone-phosphate C19H37O7P1 + H3N1 -> C19H40N1O7P1 + [13]C1C-1 -> [13]C1C18H40N1O7P1
1987	252.049	16.24	5.09	Artifact	C7H14K1N2Na1O4	0.53	ornithine C5H12N2O2 + C2H3Na1O2 -> C7H15N2Na1O4 + H-1K1 -> C7H14K1N2Na1O4
1988	460.392	2.54	4.91	Metabolite	C30H52O3	-0.34	(3beta,11alpha,13beta)-3,11,13-Oleananetriol C30H52O3
1989	280.204	2.63	4.89	Artifact	C17H28O3	0.16	Nootkatol C15H24O1 + C2H4O2 -> C17H28O3
1990	89.0588	13.01	5.42	Artifact	Ring_artifact_C3H7N1O2	1.09	alanine C3H7N1O2 + Ring_artifact -> Ring_artifact_C3H7N1O2
1991	220.048	7.48	5.07	Putative metabolite	C10H8N2O4	0.48	5-Hydroxyindoleacetylglycine C12H12N2O4 - C2H4 -> C10H8N2O4
1992	220.048	7.08	5.03	Putative metabolite	C10H8N2O4	0.48	5-Hydroxyindoleacetylglycine C12H12N2O4 - C2H4 -> C10H8N2O4
1993	200.08	13.59	5.04	Artifact	C8H12N2O4	0.53	Glutamylalanine C8H14N2O5 - H2O1 -> C8H12N2O4
1994	200.08	11.3	4.44	Artifact	C8H12N2O4	0.53	L-2-Amino-4-methylenepentanedioic acid C6H9N1O4 + C2H3N1 -> C8H12N2O4
1995	288.107	14.02	5.04	Artifact	C10H16N4O6	0.29	Asparaginyl-Glutamic acid C9H15N3O6 + C1H1N1 -> C10H16N4O6
1996	288.105	14.68	4.03	Artifact	C8H17N4Na1O6	-0.07	Glycyl-Lysine C8H17N3O3 + N1Na1O3 -> C8H17N4Na1O6
1997	146.049	13.39	5.18	Artifact	Ring_artifact_C5H10N2O3	0.59	glutamine C5H10N2O3 + Ring_artifact -> Ring_artifact_C5H10N2O3
1998	362.081	13.33	5.03	Artifact	C8H22N2O10Si2	-0.28	glutamine C5H10N2O3 + H4O4Si1 -> C5H14N2O7Si1 + C3H8O3Si1 -> C8H22N2O10Si2
1999	269.867	13.85	5.02	Artifact	H4K2O8S1Si1	0.1	KOH H1K1O1 + H1K1O4S1 + H2O3Si1 -> H4K2O8S1Si1
[truncated: 3,589 more rows]

## Sheet: full annotations with scores
peak_id	medMz	medRt	log10_inten	class	formula	ppm_error	annotation	ilp_node_id	mass	rdbe	category	parent_id	parent_formula	transform	direction	steps	struct_set_id	score_database_origin	score_mz	score_known_rt	score_RDBE	score_element_ratio	score_missing_isotope_Cl	score_propagation	sum_score	Input_id	score_class	cplex_score	ilp_solution
1	282.256	2.44	9	Metabolite	C18H34O2	0.28	Oleic acid C18H34O2	1	282.256	2	Metabolite	5718	C18H34O2		1	0	2	0.5	-0.0493131		0	0		0	0.450687	1	0.1	0.550687	1
2	256.24	2.47	8.66	Metabolite	C16H32O2	0.51	Palmitic acid C16H32O2	5	256.24	1	Metabolite	5730	C16H32O2		1	0	27	0.5	-0.0514292		0	0		0	0.448571	2	0.1	0.548571	1
3	254.225	2.48	8.66	Metabolite	C16H30O2	-0.08	Hypogeic acid C16H30O2	9	254.225	2	Metabolite	7021	C16H30O2		1	0	51	0.5	-0.242735		0	0		0	0.257265	3	0.1	0.357265	1
4	89.0476	13.01	8.65	Metabolite	C3H7N1O2	0.88	alanine C3H7N1O2	13	89.0477	1	Metabolite	119031	C3H7N1O2		1	0	86	0.5	-0.10398	0.97776	0	0		0	1.37378	4	0.1	1.47378	1
5	144.115	4.21	8.45	Metabolite	C8H16O2	0.9	Caprylic acid C8H16O2	17	144.115	1	Metabolite	5949	C8H16O2		1	0	134	0.5	-0.152425		0	0		0	0.347575	6	0.1	0.447575	1
6	144.115	2.82	8.33	Metabolite	C8H16O2	0.9	Caprylic acid C8H16O2	21	144.115	1	Metabolite	5949	C8H16O2		1	0	187	0.5	-0.152425		0	0		0	0.347575	7	0.1	0.447575	1
7	284.271	2.43	8.43	Metabolite	C18H36O2	1.16	Stearic acid C18H36O2	24	284.272	1	Metabolite	119234	C18H36O2		1	0	241	0.5	-0.390361	0.917605	0	0		0	1.02724	8	0.1	1.12724	1
8	147.053	13.5	8.42	Metabolite	C5H9N1O4	1.07	glutamate C5H9N1O4	28	147.053	2	Metabolite	119116	C5H9N1O4		1	0	280	0.5	-0.242973	0.71187	0	0		0	0.968897	11	0.1	1.0689	1
9	147.053	9.98	6.61	Metabolite	C5H9N1O4	0.39	O-acetyl-L-serine C5H9N1O4	36	147.053	2	Metabolite	119202	C5H9N1O4		1	0	374	0.5	-0.0970401	0.780596	0	0		0	1.18356	12	0.1	1.28356	1
10	283.259	2.44	8.3	Artifact	[13]C1C17H34O2	0.48	Oleic acid C18H34O2 + [13]C1C-1 -> [13]C1C17H34O2	40	283.259	2	Natural_abundance	1	C18H34O2	[13]C1C-1	1	0.01	431	0	-0.0473778	0	0	0		0	-0.0473778	13	0	-0.0473778	1
11	157.998	13.89	8.31	Artifact	C4H7K1O4	0.89	CH3COOK C2H3K1O2 + C2H4O2	42	157.998	0	Adduct	1751	C2H3K1O2	C2H4O2	1	0.01	445	0	-0.166139	0	0	0		0	-0.166139	14	0	-0.166139	1
12	122.037	4.21	8.2	Metabolite	C7H6O2	0.65	Benzoic acid C7H6O2	46	122.037	5	Metabolite	6800	C7H6O2		1	0	458	0.5	-0.0119099		0	0		0	0.48809	15	0.1	0.58809	1
13	146.069	11.29	5.4	Metabolite	C5H10N2O3	0.29	L-Glutamine C5H10N2O3	49	146.069	2	Metabolite	6077	C5H10N2O3		1	0	492	0.5	-0.15055		0	0		0	0.34945	17	0.1	0.44945	1
14	174.112	16.77	8.19	Metabolite	C6H14N4O2	1.01	L-Arginine C6H14N4O2	54	174.112	2	Metabolite	5978	C6H14N4O2		1	0	556	0.5	-0.244089		0	0		0	0.255911	18	0.1	0.355911	1
15	175.095	13.64	8.06	Metabolite	C6H13N3O3	1.09	citrulline C6H13N3O3	63	175.096	2	Metabolite	119056	C6H13N3O3		1	0	585	0.5	-0.286811	0.91668	0	0		0	1.12987	21	0.1	1.22987	1
16	116.084	4.24	7.94	Metabolite	C6H12O2	0.25	Caproic acid C6H12O2	68	116.084	1	Metabolite	5994	C6H12O2		1	0	620	0.5	-0.222887		0	0		0	0.277113	25	0.1	0.377113	1
17	116.084	3.01	7.37	Metabolite	C6H12O2	0.25	4-Methylvaleric acid C6H12O2	72	116.084	1	Metabolite	119387	C6H12O2		1	0	687	0.5	-0.222887	0.985594	0	0		0	1.26271	26	0.1	1.36271	1
18	257.243	2.47	7.9	Artifact	[13]C1C15H32O2	0.33	Palmitic acid C16H32O2 + [13]C1C-1 -> [13]C1C15H32O2	77	257.244	1	Natural_abundance	2	C16H32O2	[13]C1C-1	1	0.01	713	0	-0.0370025	0	0	0		0	-0.0370025	27	0	-0.0370025	1
19	255.228	2.48	7.91	Artifact	[13]C1C15H30O2	0.14	Hypogeic acid C16H30O2 + [13]C1C-1 -> [13]C1C15H30O2	79	255.228	2	Natural_abundance	3	C16H30O2	[13]C1C-1	1	0.01	715	0	-0.134751	0	0	0		0	-0.134751	28	0	-0.134751	1
20	206.167	2.58	7.83	Metabolite	C14H22O1	0.8	4-(1,1,3,3-Tetramethylbutyl)-phenol C14H22O1	80	206.167	4	Metabolite	14081	C14H22O1		1	0	717	0.5	-0.168381		0	0		0	0.331619	30	0.1	0.431619	1
21	132.09	13.64	7.85	Metabolite	C5H12N2O2	0.59	Ornithine C5H12N2O2	85	132.09	1	Metabolite	5725	C5H12N2O2		1	0	735	0.5	-0.0239522		0	0		0	0.476048	31	0.1	0.576048	1
22	132.09	16.24	7.34	Metabolite	C5H12N2O2	0.59	ornithine C5H12N2O2	88	132.09	1	Metabolite	119204	C5H12N2O2		1	0	784	0.5	-0.0239522	0.64229	0	0		0	1.11834	32	0.1	1.21834	1
23	132.09	16.78	7.34	Metabolite	C5H12N2O2	0.59	ornithine C5H12N2O2	91	132.09	1	Metabolite	119204	C5H12N2O2		1	0	831	0.5	-0.0239522	0.81667	0	0		0	1.29272	33	0.1	1.39272	1
24	132.092	9.84	4.83	Artifact	[15]N1C6H13O2	0.48	isoleucine C6H13N1O2 + [15]N1N-1 -> [15]N1C6H13O2	95	132.092	1	Natural_abundance	63	C6H13N1O2	[15]N1N-1	1	0.01	877	0	-0.0770146	0	0	0		0.721486	0.644471	34	0	0.644471	1
25	132.092	9.29	4.77	Artifact	[15]N1C6H13O2	0.48	leucine C6H13N1O2 + [15]N1N-1 -> [15]N1C6H13O2	97	132.092	1	Natural_abundance	64	C6H13N1O2	[15]N1N-1	1	0.01	879	0	-0.0770146	0	0	0		0.694275	0.61726	35	0	0.61726	1
26	285.275	2.44	7.72	Artifact	[13]C1C17H36O2	0.65	Stearic acid C18H36O2 + [13]C1C-1 -> [13]C1C17H36O2	99	285.275	1	Natural_abundance	7	C18H36O2	[13]C1C-1	1	0.01	881	0	-0.134234	0	0	0		0.527244	0.393009	36	0	0.393009	1
27	152.068	7.19	7.7	Metabolite	C5H12O5	1.14	Ribitol C5H12O5	101	152.068	0	Metabolite	5970	C5H12O5		1	0	893	0.5	-0.283923		0	0		0	0.216077	38	0.1	0.316077	1
28	192.027	14.18	7.67	Metabolite	C6H8O7	0.01	citrate/isocitrate C6H8O7	105	192.027	3	Metabolite	119055	C6H8O7		1	0	940	0.5	-0.236922	0.79779	0	0		0	1.06087	39	0.1	1.16087	1
29	119.058	13.01	7.66	Metabolite	C4H9N1O3	0.36	threonine C4H9N1O3	110	119.058	1	Metabolite	119238	C4H9N1O3		1	0	1017	0.5	-0.162218	0.96089	0	0		0	1.29867	40	0.1	1.39867	1
30	240.067	2.62	7.47	Putative metabolite	C8H16O6S1	-0.59	7-Hydroxyoctanoic acid C8H16O3 + O3S1 -> C8H16O6S1	116	240.067	1	Metabolite	119292	C8H16O3	O3S1	1	0	1049	0	-0.504747	0	0	0		0	-0.504747	42	0	-0.504747	1
31	117.079	11.21	7.61	Metabolite	C5H11N1O2	-0.18	DL-Valine C5H11N1O2	124	117.079	1	Metabolite	119099	C5H11N1O2		1	0	1134	0.5	-0.439479	0.76016	0	0		0	0.820681	44	0.1	0.920681	1
32	166.048	2.56	7.34	Metabolite	C5H10O6	-1.58	Arabinonic acid C5H10O6	129	166.048	1	Metabolite	5997	C5H10O6		1	0	1173	0.5	-1.05814		0	0		0	-0.558137	46	0.1	-0.458137	1
33	166.048	2.84	7.34	Metabolite	C5H10O6	-1.58	Arabinonic acid C5H10O6	137	166.048	1	Metabolite	5997	C5H10O6		1	0	1246	0.5	-1.05814		0	0		0	-0.558137	47	0.1	-0.458137	1
34	317.124	13.58	7.55	Artifact	C10H24N1O8P1	0.48	Glycerophosphocholine C8H20N1O6P1 + C2H4O2 -> C10H24N1O8P1	143	317.124	0	Adduct	1326	C8H20N1O6P1	C2H4O2	1	0.01	1322	0	-0.0622921	0	0	0		0.496795	0.434503	48	0	0.434503	1
35	88.016	4.2	7.42	Metabolite	C3H4O3	0.84	pyruvate C3H4O3	153	88.016	2	Metabolite	119222	C3H4O3		1	0	1355	0.5	-0.129703	0.879339	0	0		0	1.24964	51	0.1	1.34964	1
36	88.016	3.02	6.59	Artifact	C3H4O3	0.61	L-(?)-3-Phenyllactic acid C9H10O3 - Library_MS2_fragment -> C3H4O3	156	88.016	5	Library_MS2_fragment	75	C9H10O3	Library_MS2_fragment	-1	0.01	1399	0	-0.243331	0	0	0		0.632244	0.388913	52	0	0.388913	1
37	88.016	4.95	7.25	Metabolite	C3H4O3	0.61	Pyruvic acid C3H4O3	160	88.016	2	Metabolite	5749	C3H4O3		1	0	1421	0.5	-0.243319		0	0		0	0.256681	53	0.1	0.356681	1
38	159.137	14.71	3.99	Artifact	C7H17N3O1	1.65	Glycyl-Lysine C8H17N3O3 - C1O2 -> C7H17N3O1	165	159.137	1	Fragment	677	C8H17N3O3	C1O2	-1	0.01	1446	0	-0.546295	0	0	0		0	-0.546295	54	0	-0.546295	1
39	134.021	13.54	7.48	Metabolite	C4H6O5	0.92	malate C4H6O5	166	134.022	2	Metabolite	119161	C4H6O5		1	0	1468	0.5	-0.145726	0.73778	0	0		0	1.09205	55	0.1	1.19205	1
40	145.118	4.21	7.41	Artifact	[13]C1C7H16O2	1.27	Caprylic acid C8H16O2 + [13]C1C-1 -> [13]C1C7H16O2	172	145.118	1	Natural_abundance	5	C8H16O2	[13]C1C-1	1	0.01	1504	0	-0.339515	0	0	0		0	-0.339515	56	0	-0.339515	1
41	145.118	2.82	7.28	Artifact	[13]C1C7H16O2	0.58	Caprylic acid C8H16O2 + [13]C1C-1 -> [13]C1C7H16O2	174	145.118	1	Natural_abundance	6	C8H16O2	[13]C1C-1	1	0.01	1506	0	-0.00503095	0	0	0		0	-0.00503095	57	0	-0.00503095	1
42	233.891	13.84	7.34	Artifact	H3K1O8S2	0.17	KHSO4 H1K1O4S1 + H2O4S1	177	233.891	0	Adduct	119418	H1K1O4S1	H2O4S1	1	0	1508	0	-0.128103	0	0	0		0	-0.128103	59	0	-0.128103	1
43	195.944	13.85	7.36	Artifact	C2H5K1O6S1	0.97	KHSO4 H1K1O4S1 + C2H4O2	200	195.944	0	Adduct	119418	H1K1O4S1	C2H4O2	1	0	1546	0	-0.245701	0	0	0		0	-0.245701	60	0	-0.245701	1
44	314.086	2.6	7.14	Putative metabolite	C11H14N4O7	1.43	Xanthine C5H4N4O2 + C6H10O5 -> C11H14N4O7	210	314.086	7	Metabolite	855	C10H14N4O5	C1O2	1	1	1584	0	-0.534106	0	0	0		0	-0.534106	61	0	-0.534106	1
45	314.088	14	5.31	Artifact	C11H19K1N2O6	-0.26	Saccharopine C11H20N2O6 + H-1K1 -> C11H19K1N2O6	216	314.088	3	Adduct	410	C11H20N2O6	H-1K1	1	0.01	1631	0	-0.310426	0	0	0		0	-0.310426	62	0	-0.310426	1
46	446.194	2.78	7.3	Metabolite	C24H30O8	-0.07	Estrone glucuronide C24H30O8	227	446.194	10	Metabolite	7659	C24H30O8		1	0	1670	0.5	-0.186767		0	0		0	0.313233	63	0.1	0.413233	1
47	402.137	13.88	7.19	Artifact	C14H26O13	0.1	Lactose C12H22O11 + C2H4O2 -> C14H26O13	234	402.137	2	Adduct	130	C12H22O11	C2H4O2	1	0.01	1686	0	-0.107672	0	0	0		0.82025	0.712578	64	0	0.712578	1
48	402.137	14.82	6.65	Artifact	C14H26O13	0.1	Melibiose C12H22O11 + C2H4O2 -> C14H26O13	243	402.137	2	Adduct	129	C12H22O11	C2H4O2	1	0.01	1724	0	-0.107672	0	0	0		0	-0.107672	65	0	-0.107672	1
49	312.176	2.08	7.31	Metabolite	C17H28O3S1	-0.27	N-Undecylbenzenesulfonic acid C17H28O3S1	250	312.176	4	Metabolite	18985	C17H28O3S1		1	0	1760	0.5	-0.316267		0	0		0	0.183733	66	0.1	0.283733	1
50	103.063	13.5	7.32	Artifact	C4H9N1O2	0.28	glutamate C5H9N1O4 - C1O2 -> C4H9N1O2	259	103.063	2	Library_MS2_fragment	4664	C5H10N2O3	Library_MS2_fragment	-1	0.01	1827	0	-0.246014	0	0	0		0.720566	0.474553	67	0	0.474553	1
51	103.063	12.17	6.6	Metabolite	C4H9N1O2	0.28	b-Aminoisobutyric acid C4H9N1O2	263	103.063	1	Metabolite	119044	C4H9N1O2		1	0	1866	0.5	-0.246198	0.99641	0	0		0	1.25021	68	0.1	1.35021	1
52	307.084	13.5	7.21	Metabolite	C10H17N3O6S1	0.02	glutathione C10H17N3O6S1	267	307.084	4	Metabolite	119119	C10H17N3O6S1		1	0	1924	0.5	-0.17282	0.55187	0	0		0	0.87905	71	0.1	0.97905	1
53	170.131	2.71	7.26	Metabolite	C10H18O2	0.47	cis-4-Decenoic acid C10H18O2	278	170.131	2	Metabolite	7857	C10H18O2		1	0	1986	0.5	-0.0301554		0	0		0	0.469845	72	0.1	0.569845	1
54	170.131	4.16	6.68	Metabolite	C10H18O2	0.47	cis-4-Decenoic acid C10H18O2	281	170.131	2	Metabolite	7857	C10H18O2		1	0	2041	0.5	-0.0301554		0	0		0	0.469845	73	0.1	0.569845	1
55	129.043	13.49	7.26	Artifact	C5H7N1O3	-0.05	glutamate C5H9N1O4 - H2O1 -> C5H7N1O3	284	129.043	2	Library_MS2_fragment	4664	C5H10N2O3	Library_MS2_fragment	-1	0.01	2124	0	-0.350049	0	0	0		0.720566	0.370518	74	0	0.370518	1
56	129.043	10.34	6.47	Metabolite	C5H7N1O3	-0.05	Pyroglutamic acid C5H7N1O3	288	129.043	3	Metabolite	5767	C5H7N1O3		1	0	2159	0.5	-0.350026		0	0		0	0.149974	75	0.1	0.249974	1
57	129.042	11.15	6.92	Metabolite	C5H7N1O3	0.72	Pyroglutamic acid C5H7N1O3	291	129.043	3	Metabolite	5767	C5H7N1O3		1	0	2213	0.5	-0.0374435		0	0		0	0.462556	76	0.1	0.562556	1
58	326.192	2.08	7.22	Metabolite	C18H30O3S1	0.2	2-Dodecylbenzenesulfonic acid C18H30O3S1	296	326.192	4	Metabolite	17609	C18H30O3S1		1	0	2268	0.5	-0.0760616		0	0		0	0.423938	77	0.1	0.523938	1
59	300.266	2.64	7.25	Metabolite	C18H36O3	0.15	(R)-3-Hydroxy-Octadecanoic acid C18H36O3	306	300.266	1	Metabolite	12251	C18H36O3		1	0	2288	0.5	-0.109972		0	0		0	0.390028	78	0.1	0.490028	1
60	300.266	4.19	6.64	Metabolite	C18H36O3	0.15	(R)-3-Hydroxy-Octadecanoic acid C18H36O3	310	300.266	1	Metabolite	12251	C18H36O3		1	0	2318	0.5	-0.109972		0	0		0	0.390028	79	0.1	0.490028	1
61	242.225	2.48	7.25	Metabolite	C15H30O2	-0.08	Pentadecanoic acid C15H30O2	314	242.225	1	Metabolite	6234	C15H30O2		1	0	2348	0.5	-0.250767		0	0		0	0.249233	80	0.1	0.349233	1
62	284.263	2.44	7.22	Artifact	[13]C2C16H34O2	-2.85	Oleic acid C18H34O2 + [13]C1C-1 -> [13]C1C17H34O2 + [13]C1C-1 -> [13]C2C16H34O2	318	284.263	2	Natural_abundance	10	[13]C1C17H34O2	[13]C1C-1	1	0.02	2372	0	-1.61555	0	0	0		0	-1.61555	81	0	-1.61555	1
63	131.095	9.84	7.23	Metabolite	C6H13N1O2	0.98	isoleucine C6H13N1O2	319	131.095	1	Metabolite	119150	C6H13N1O2		1	0	2406	0.5	-0.171375	0.892861	0	0		0	1.22149	82	0.1	1.32149	1
64	131.095	9.31	7.14	Metabolite	C6H13N1O2	0.98	leucine C6H13N1O2	322	131.095	1	Metabolite	119157	C6H13N1O2		1	0	2470	0.5	-0.171375	0.86565	0	0		0	1.19427	83	0.1	1.29427	1
65	90.0509	13.01	7.2	Artifact	[13]C1C2H7N1O2	1.48	alanine C3H7N1O2 + [13]C1C-1 -> [13]C1C2H7N1O2	326	90.051	1	Natural_abundance	4	C3H7N1O2	[13]C1C-1	1	0.01	2507	0	-0.200586	0	0	0		0.87378	0.673194	84	0	0.673194	1
66	159.996	13.89	7.18	Artifact	[41]K1C4H7O4	1	CH3COOK C2H3K1O2 + C2H4O2 + [41]K1K-1 -> [41]K1C4H7O4	331	159.996	0	Natural_abundance	11	C4H7K1O4	[41]K1K-1	1	0.01	2509	0	-0.222653	0	0	0		0	-0.222653	85	0	-0.222653	1
67	133.037	13.58	7.19	Metabolite	C4H7N1O4	0.81	aspartate C4H7N1O4	333	133.038	2	Metabolite	119041	C4H7N1O4		1	0	2519	0.5	-0.0887703	0.87981	0	0		0	1.29104	87	0.1	1.39104	1
68	133.037	11.29	6.78	Metabolite	C4H7N1O4	0.81	L-Aspartic acid C4H7N1O4	337	133.038	2	Metabolite	5708	C4H7N1O4		1	0	2571	0.5	-0.0887703		0	0		0	0.41123	88	0.1	0.51123	1
69	148.056	13.5	7.17	Artifact	[13]C1C4H9N1O4	2.11	glutamate C5H9N1O4 + [13]C1C-1 -> [13]C1C4H9N1O4	342	148.057	2	Natural_abundance	8	C5H9N1O4	[13]C1C-1	1	0.01	2636	0	-0.763473	0	0	0		0.468897	-0.294576	89	0	-0.294576	1
70	165.079	8.83	7.17	Metabolite	C9H11N1O2	0.48	phenylalanine C9H11N1O2	348	165.079	5	Metabolite	119211	C9H11N1O2		1	0	2679	0.5	-0.032246	0.827077	0	0		0	1.29483	92	0.1	1.39483	1
71	165.079	13.39	5.38	Metabolite	C9H11N1O2	0.48	L-Phenylalanine C9H11N1O2	352	165.079	5	Metabolite	5689	C9H11N1O2		1	0	2719	0.5	-0.032246		0	0		0	0.467754	93	0.1	0.567754	1
72	242.08	4.24	7.02	Putative metabolite	C12H10N4O2	0.31	Metabolite M6 C30H42N4O4 - C16H30O1 -> C14H12N4O3 - C2H2O1 -> C12H10N4O2	356	242.08	10	Metabolite	2422	C12H13N5O1	H3N1O-1	-1	2	2774	0	-0.0537397	0	0	0		0	-0.0537397	95	0	-0.0537397	1
73	242.079	2.37	6.37	Putative metabolite	C12H18O1S2	1.68	2,5-Dimethyl-3-(methyldithio)furan C7H10O1S2 + C5H8 -> C12H18O1S2	361	242.08	4	Metabolite	540	C13H20O1S2	C1H2	-1	2	2800	0	-0.629849	0	0	0		0	-0.629849	96	0	-0.629849	1
74	166.063	4.2	7.1	Artifact	C9H10O3	1.17	4-Hydroxystyrene C8H8O1 + C1H2O2 -> C9H10O3	371	166.063	6	Heterodimer	35	C3H4O3	1711	1	0.01	2873	0	-0.315323	0	0	0		0.749636	0.434312	103	0	0.434312	1
75	166.063	2.85	6.63	Metabolite	C9H10O3	1.17	L-(?)-3-Phenyllactic acid C9H10O3	375	166.063	5	Metabolite	119282	C9H10O3		1	0	2946	0.5	-0.315528	0.947772	0	0		0	1.13224	104	0.1	1.23224	1
76	350.191	13.65	7.08	Artifact	C12H26N6O6	-0.05	citrulline C6H13N3O3 * 2 -> C12H26N6O6	379	350.191	4	Oligomer	15	C6H13N3O3	2	1	0.01	2976	0	-0.194943	0	0	0		0.629869	0.434926	107	0	0.434926	1
77	310.287	2.41	7.05	Metabolite	C20H38O2	-0.06	11Z-Eicosenoic acid C20H38O2	384	310.287	2	Metabolite	7054	C20H38O2		1	0	2981	0.5	-0.212959		0	0		0	0.287041	108	0.1	0.387041	1
78	249.087	2.35	7.05	Artifact	C12H17O3.5S1	0.39	No edge connections.	389	249.087	4.5	Multicharge	619	C24H34O7S2	2	-1	1.02	3035	0	-0.010792	0	0	0		0	-0.010792	109	0	-0.010792	1
79	249.087	3.31	5.59	Artifact	C11.5H15O6	-1.35	Eucaglobulin C23H30O12 / 2 -> C11.5H15O6	402	249.087	4.5	Multicharge	620	C23H30O12	2	-1	0.01	3061	0	-0.882404	0	0	0		0	-0.882404	110	0	-0.882404	1
80	123.04	4.21	7.08	Artifact	[13]C1C6H6O2	1.09	Benzoic acid C7H6O2 + [13]C1C-1 -> [13]C1C6H6O2	410	123.04	5	Natural_abundance	12	C7H6O2	[13]C1C-1	1	0.01	3101	0	-0.210384	0	0	0		0	-0.210384	111	0	-0.210384	1
81	123.04	2.93	6.16	Unknown	Unknown	0.67	Unknown	411	123.04	0	Unknown	81	Unknown		0	0	3102	0	0		0	0		0	0	112	-0.5	-0.5	1
82	207.17	2.58	7.02	Artifact	[13]C1C13H22O1	0.58	4-(1,1,3,3-Tetramethylbutyl)-phenol C14H22O1 + [13]C1C-1 -> [13]C1C13H22O1	413	207.17	4	Natural_abundance	20	C14H22O1	[13]C1C-1	1	0.01	3104	0	-0.0581831	0	0	0		0	-0.0581831	113	0	-0.0581831	1
83	152.047	2.92	7.13	Metabolite	C8H8O3	0.95	3-Hydroxyphenylacetic acid C8H8O3	416	152.047	5	Metabolite	119289	C8H8O3		1	0	3153	0.5	-0.187293	0.941083	0	0		0	1.25379	115	0.1	1.35379	1
84	340.207	2.07	7.02	Putative metabolite	C19H32O3S1	0.05	N-Undecylbenzenesulfonic acid C17H28O3S1 + C2H4 -> C19H32O3S1	422	340.207	4	Metabolite	58	C18H30O3S1	C1H2	1	1	3187	0	-0.14964	0	0	0		0	-0.14964	116	0	-0.14964	1
85	270.256	2.46	6.99	Metabolite	C17H34O2	-0.07	Heptadecanoic acid C17H34O2	425	270.256	1	Metabolite	7068	C17H34O2		1	0	3189	0.5	-0.232933		0	0		0	0.267067	117	0.1	0.367067	1
86	147.072	13.39	7.03	Artifact	[13]C1C4H10N2O3	2.7	glutamine C5H10N2O3 + [13]C1C-1 -> [13]C1C4H10N2O3	429	147.072	2	Natural_abundance	4664	C5H10N2O3	[13]C1C-1	1	0.01	3224	0	-1.05615	0	0	0		0.720566	-0.335582	118	0	-0.335582	1
87	188.08	11.29	7.01	Artifact	C7H12N2O4	0.57	Peak 3989 C14H24N4O8 / 2 -> C7H12N2O4	436	188.08	3	Adduct	1937	C6H10N2O1	C1H2O3	1	0.01	3269	0	-0.0369139	0	0	0		0	-0.0369139	119	0	-0.0369139	1
88	331.877	13.87	7.02	Artifact	C4H7K3O8S1	-0.05	KHSO4 H1K1O4S1 + C2H3K1O2 + C2H3K1O2 -> C4H7K3O8S1	453	331.877	0	Adduct	1940	C3H6K2O5S1	C1H1K1O3	1	0.02	3408	0	-0.199655	0	0	0		0	-0.199655	120	0	-0.199655	1
89	255.975	13.9	6.98	Artifact	C6H10K2O6	0.2	CH3COOK C2H3K1O2 + C2H4O2 + C2H3K1O2 -> C6H10K2O6	492	255.975	0	Adduct	11	C4H7K1O4	C2H3K1O2	1	0.01	3502	0	-0.101691	0	0	0		0	-0.101691	121	0	-0.101691	1
90	182.079	11.81	7.02	Metabolite	C6H14O6	0.21	Galactitol C6H14O6	499	182.079	0	Metabolite	5655	C6H14O6		1	0	3533	0.5	-0.147703		0	0		0	0.352297	122	0.1	0.452297	1
91	175.115	16.77	7.02	Artifact	[13]C1C5H14N4O2	1.32	L-Arginine C6H14N4O2 + [13]C1C-1 -> [13]C1C5H14N4O2	506	175.115	2	Natural_abundance	14	C6H14N4O2	[13]C1C-1	1	0.01	3569	0	-0.398811	0	0	0		0	-0.398811	123	0	-0.398811	1
92	612.152	14.19	6.98	Metabolite	C20H32N6O12S2	-0.23	glutathione disulfide C20H32N6O12S2	512	612.152	8	Metabolite	119120	C20H32N6O12S2		1	0	3579	0.5	-0.244486	0.56822	0	0		0	0.823734	124	0.1	0.923734	1
[truncated: 5,496 more rows]

## Sheet: atom difference rule table
category	name	formula	mass	direction	rdbe	note
[truncated: 84 more rows]

[truncated: 1 more sheets: HMDB metabolite information]
